# Supplementary material
Source: PubMed Central journal article supplement (PMC6994383)
Supplement: NIHMS1045886-supplement-Supp_TableS1.pdf [file NIHMS1045886-supplement-Supp_TableS1.pdf]

**Supplementary Table 1. Proteins included on the array**

| <b>Protein name</b>                           | <b>UniProt ID</b> |
|-----------------------------------------------|-------------------|
| 78 kDa glucose-regulated protein              | P11021            |
| Actin-related protein 2/3 complex subunit 1B  | O15143            |
| Actin, cytoplasmic 2                          | P63261            |
| Alpha-1-antitrypsin                           | P01009            |
| Alpha-2-macroglobulin                         | P01023            |
| Alpha-enolase                                 | P06733            |
| Annexin A1                                    | P04083            |
| Antithrombin-III                              | P01008            |
| Apolipoprotein A-I                            | P02647            |
| Apolipoprotein A-IV                           | P06727            |
| Apolipoprotein B-100                          | P04114            |
| Apolipoprotein C-I                            | P02654            |
| Apolipoprotein C-III                          | P02656            |
| Apolipoprotein E                              | P02649            |
| Beta-2-glycoprotein 1                         | P02749            |
| Beta-actin (actin cytoplasmic 1)              | P60709            |
| C4b-binding protein alpha chain               | P04003            |
| C4b-binding protein beta chain                | P20851            |
| CD44 antigen                                  | P16070            |
| Ceruloplasmin                                 | P00450            |
| Charged multivesicular body protein 2a        | O43633            |
| Clusterin                                     | P10909            |
| Coagulation factor XII                        | P00748            |
| Collagen alpha-1(I) chain (Type I collagen)   | P02452            |
| Collagen alpha-1(II) chain (Type II collagen) | P02458            |
| Collagen alpha-2(I) chain (Type I collagen)   | P08123            |
| Complement C1q subcomponent subunit A         | P02745            |
| Complement C1q subcomponent subunit B         | P02746            |
| Complement C1q subcomponent subunit C         | P02747            |
| Complement C1r subcomponent                   | P00736            |
| Complement C1s subcomponent                   | P09871            |
| Complement C2                                 | P06681            |
| Complement C3                                 | P01024            |
| Complement C4-A                               | P0C0L4            |
| Complement C4-B                               | P0C0L5            |
| Complement C5                                 | P01031            |
| Complement component C6                       | P13671            |
| Complement component C7                       | P10643            |
| Complement component C8 alpha chain           | P07357            |
| Complement component C8 beta chain            | P07358            |

|                                             |               |
|---------------------------------------------|---------------|
| Complement component C8 gamma chain         | P07360        |
| Complement component C9                     | P02748        |
| Complement factor B                         | P00751        |
| Complement factor H                         | P08603        |
| Complement factor H-related protein 1       | Q03591        |
| Complement factor H-related protein 2       | P36980        |
| Complement factor H-related protein 3       | Q02985        |
| Complement factor H-related protein 4       | Q92496        |
| Complement factor H-related protein 5       | Q9BXR6        |
| Complement factor I                         | P05156        |
| Coronin 1A                                  | P31146        |
| Cytotoxic T-lymphocyte protein 4            | P16410        |
| Eosinophil lysophospholipase                | Q05315        |
| Fibrinogen alpha chain                      | P02671        |
| Fibrinogen beta chain                       | P02675        |
| Fibrinogen gamma chain                      | P02679        |
| Fibronectin                                 | P02751        |
| filaggrin                                   | P20930        |
| Gelsolin                                    | P06396        |
| Glyceraldehyde-3-phosphate dehydrogenase    | P04406        |
| Haptoglobin                                 | P00738        |
| Heat shock 70 kDa protein 1A/1B             | P0DMV8        |
| Heat shock protein HSP 90-alpha -reference  | P07900        |
| Hemopexin (beta-1B-glycoprotein)            | P02790        |
| Heterochromatin protein 1-binding protein 3 | Q5SSJ5        |
| High mobility group protein B1              | P09429        |
| High mobility group protein B2              | P26583        |
|                                             | A3ROT8        |
|                                             | A1L407        |
|                                             | Q4VB24        |
|                                             | P07305        |
|                                             | Q02539        |
|                                             | P16403        |
| Histone H1                                  | P16402        |
|                                             | P10412        |
|                                             | P16401        |
|                                             | Q8IZA3        |
|                                             | P22492        |
|                                             | <b>Q92522</b> |
|                                             | O75367        |
|                                             | Q9P0M6        |
|                                             | P0C0S8        |

Histone H2A

Q96QV6  
P04908  
Q93077  
P20671  
Q96KK5  
Q99878  
Q6FI13  
Q8IUE6  
**Q16777**  
Q7L7L0  
A0A024QZP6  
A0A024R017  
A0A024RAS2  
A0A0U1RR32  
A0A0U1RRH7  
A2RUA4  
A3KPC7  
A4FTV9  
B2R5B3  
B2R5B6  
B4DJC3  
B4E0B3  
C9J0D1  
C9J386  
D6RCF2  
E5RJU1  
H0YFX9  
P0C5Y9  
P0C5Z0  
Q08AJ9  
Q59FH0  
Q5SQT3  
Q92646  
Q9HA11  
Q9BTM1  
Q71UI9  
P0C0S5  
P16104  
Q96A08  
P33778  
P62807  
P58876

Histone H2B

Q93079  
P06899  
O60814  
Q99880  
Q99879  
Q99877  
P23527  
**Q16778**  
Q5QNW6  
Q8N257  
P0C1H6  
P57053  
Q7Z2G1  
A0A024QZZ7  
A0A024RCJ2  
A0A024RCJ9  
A0A024RCL8  
A8K9J7  
A9UJN3  
B2R4S9  
B4DR52  
I6L9F7  
L0R4T3  
U3KPT8  
U3KQK0  
W0TYI6  
Q6DN03  
Q6DRA6  
B2R4P9  
B4DEB1  
K7EK07  
Q5TEC6  
A8K4Y7  
B2R6Y1  
B4E380  
K7EMV3  
K7EP01  
K7ES00  
P68431  
Q16695  
Q71DI3  
**P84243**

Histone H3

|                                              |               |
|----------------------------------------------|---------------|
|                                              | Q6NXT2        |
|                                              | <b>B2R4R0</b> |
| Histone H4                                   | P62805        |
|                                              | Q0VAS5        |
|                                              | Q6B823        |
| Hyaluronan-binding protein 2                 | Q14520        |
| Ig alpha-1 chain C region                    | P01876        |
| Ig alpha-2 chain C region                    | P01877        |
| Ig delta chain C region                      | P01880        |
| Ig epsilon chain C region                    | P01854        |
| Ig gamma-1 chain C region (secreted)         | P01857        |
| Ig gamma-2 chain C region (SECRETED)         | P01859        |
| Ig gamma-3 chain C region (secreted)         | P01860        |
| Ig gamma-4 chain C region (secreted)         | P01861        |
| Ig kappa chain C region                      | P01834        |
|                                              | P0CG04        |
|                                              | P0CG05        |
| Ig lambda chain C regions                    | P0CG06        |
|                                              | P0CF74        |
|                                              | A0M8Q6        |
| Ig mu chain C region (secreted - isoform 1)  | P01871        |
| Inter-alpha-trypsin inhibitor heavy chain H2 | P19823        |
| Inter-alpha-trypsin inhibitor heavy chain H4 | Q14624        |
| Kininogen-1                                  | P01042        |
| Lamin-B receptor                             | Q14739        |
| Leucine-rich alpha-2-glycoprotein            | P02750        |
| MMP8 (neutrophil collagenase)                | P22894        |
| Myeloid cell nuclear differentiation antigen | P41218        |
| Myeloperoxidase                              | P05164        |
| Myosin-9                                     | P35579        |
| Neutrophil cytosol factor 1                  | P14598        |
| Peptidyl-prolyl cis-trans isomerase A        | P62937        |
| Plasminogen                                  | P00747        |
| Polyadenylate-binding protein 1              | P11940        |
| Profilin 1                                   | P07737        |
| Protein kinase C delta type                  | Q05655        |
| Protein S100-A8                              | P05109        |
| Protein S100-A9                              | P06702        |
| Protein-arginine deiminase type-1            | Q9ULC6        |
| Protein-arginine deiminase type-2            | Q9Y2J8        |
| Protein-arginine deiminase type-3            | Q9ULW8        |
| Protein-arginine deiminase type-4            | Q9UM07        |

|                                                   |        |
|---------------------------------------------------|--------|
| Protein-arginine deiminase type-6                 | Q6TGC4 |
| Proteoglycan 4                                    | Q92954 |
| Prothrombin                                       | P00734 |
| Serotransferrin                                   | P02787 |
| Serum albumin                                     | P02768 |
| Serum amyloid A-2 protein                         | P0DJI9 |
| STAT4                                             | Q14765 |
| Tenascin                                          | P24821 |
| Transgelin-2                                      | P37802 |
| Tubulin alpha-1B chain                            | P68363 |
| Tumor necrosis factor-inducible gene 6 protein    | P98066 |
| Tyrosine-protein phosphatase non-receptor type 22 | Q9Y2R2 |
| Vimentin                                          | P08670 |
| Vinculin                                          | P18206 |
| Vitamin D-binding protein                         | P02774 |
| Zinc-alpha-2-glycoprotein                         | P25311 |

**Proteins in bold are included in the array in duplicate.**
