# Supplementary material
Source: PubMed Central journal article supplement (PMC6994383)
Supplement: NIHMS1045886-supplement-Supp_TableS2.pdf [file NIHMS1045886-supplement-Supp_TableS2.pdf]

**Supplementary Table 2: Patient Demographics**

|                             | Control    | CCP+RF+    | CCP+RF-    | CCP-RF+    | CCP-RF-    | p    |
|-----------------------------|------------|------------|------------|------------|------------|------|
|                             | n=12       | n=12       | n=12       | n=12       | n=12       |      |
| Age, mean (SE)              | 56.8 (4.1) | 59.0 (3.8) | 63.4 (3.5) | 58.5 (1.9) | 61.6 (3.6) | 0.69 |
| Female, number (%)          | 8 (66.7)   | 8 (66.7)   | 8 (66.7)   | 10 (83.3)  | 9 (75.0)   | 0.91 |
| Race/Ethnicity, number (%)  |            |            |            |            |            |      |
| White                       | 10 (83.3)  | 10 (83.3)  | 10 (83.3)  | 7 (58.3)   | 10 (83.3)  | 0.38 |
| Black                       | 1 (8.3)    | 0 (0.0)    | 1 (8.3)    | 1 (8.3)    | 0 (0.0)    |      |
| Hispanic                    | 0 (0.0)    | 2 (16.7)   | 0 (0.0)    | 0 (0.0)    | 0 (0.0)    |      |
| Native American             | 1 (8.3)    | 0 (0.0)    | 1 (8.3)    | 3 (25.0)   | 2 (16.7)   |      |
| Asian                       | 0 (0.0)    | 0 (0.0)    | 0 (0.0)    | 1 (8.3)    | 0 (0.0)    |      |
| Ever Smoked, number (%)     | 4 (33.3)   | 5 (41.7)   | 3 (25.0)   | 5 (41.7)   | 6 (50.0)   | 0.85 |
| Peak RF, mean (SE)          | -          | 124 (22)   | -          | 128 (25)   | -          | 0.90 |
| Peak CCP, mean (SE)         | -          | 156 (14)   | 144 (18)   | -          | -          | 0.60 |
| Years with RA, mean (SE) *  | -          | 12.3 (3.9) | 14.6 (3.6) | 6.4 (1.2)  | 13.2 (3.5) | 0.30 |
| Erosive Disease, number (%) | -          | 5 (41.7)   | 6 (50.0)   | 3 (25.0)   | 7 (58.3)   | 0.48 |

\* Rheumatoid Arthritis (RA)
