# Supplementary material
Source: PubMed Central journal article supplement (PMC6994383)
Supplement: NIHMS1045886-supplement-Supp_TableS3.pdf [file NIHMS1045886-supplement-Supp_TableS3.pdf]

Peptides bound by IgG at a level 10X greater in rheumatoid arthritis (RA) than controls

| protein | position | probe/peptide | native | citrulline (B) | homocitrulline (J) | IgG binding (RA/Control) |
|---------|----------|---------------|--------|----------------|--------------------|--------------------------|
| P11021  | 91       | TVFDAKBLIGBT  | FALSE  | TRUE           | FALSE              | 11.31                    |
| P11021  | 92       | VFDAKBLIGBTW  | FALSE  | TRUE           | FALSE              | 10.41                    |
| P11021  | 93       | FDAKBLIGBTWN  | FALSE  | TRUE           | FALSE              | 13.27                    |
| P11021  | 94       | DAKBLIGBTWND  | FALSE  | TRUE           | FALSE              | 18.84                    |
| P11021  | 95       | AKBLIGBTWNDP  | FALSE  | TRUE           | FALSE              | 13.77                    |
| P11021  | 96       | KBLIGBTWNDPS  | FALSE  | TRUE           | FALSE              | 25.28                    |
| P11021  | 97       | BLIGBTWNDPSV  | FALSE  | TRUE           | FALSE              | 16.11                    |
| P11021  | 99       | IGBTWNDPSVQQ  | FALSE  | TRUE           | FALSE              | 10.52                    |
| P11021  | 174      | AYFNDAQBQATK  | FALSE  | TRUE           | FALSE              | 18.94                    |
| P11021  | 175      | YFNDAQBQATKD  | FALSE  | TRUE           | FALSE              | 17.96                    |
| P11021  | 176      | FNDAQBQATKDA  | FALSE  | TRUE           | FALSE              | 15.04                    |
| P11021  | 177      | NDAQBQATKDAG  | FALSE  | TRUE           | FALSE              | 13.88                    |
| P11021  | 178      | DAQBQATKDAGT  | FALSE  | TRUE           | FALSE              | 28.67                    |
| P11021  | 179      | AQBQATKDAGTI  | FALSE  | TRUE           | FALSE              | 31.44                    |
| P11021  | 180      | QBQATKDAGTIA  | FALSE  | TRUE           | FALSE              | 38.09                    |
| P11021  | 181      | BQATKDAGTIAG  | FALSE  | TRUE           | FALSE              | 24.64                    |
| P11021  | 204      | AAAIAYGLDKBE  | FALSE  | TRUE           | FALSE              | 10.6                     |
| P11021  | 205      | AAIAYGLDKBEG  | FALSE  | TRUE           | FALSE              | 12.4                     |
| P11021  | 207      | IAYGLDKBEGEK  | FALSE  | TRUE           | FALSE              | 18.26                    |
| P11021  | 208      | AYGLDKBEGEKN  | FALSE  | TRUE           | FALSE              | 22.96                    |
| P11021  | 209      | YGLDKBEGEKNI  | FALSE  | TRUE           | FALSE              | 22.71                    |
| P11021  | 210      | GLDKBEGEKNIL  | FALSE  | TRUE           | FALSE              | 23.45                    |
| P11021  | 211      | LDKBEGEKNILV  | FALSE  | TRUE           | FALSE              | 16.51                    |
| P11021  | 213      | KBEGEKNILVFD  | FALSE  | TRUE           | FALSE              | 15.43                    |
| P11021  | 274      | TGKDVBKDNBAV  | FALSE  | TRUE           | FALSE              | 11.33                    |
| P11021  | 277      | DVBKDNBAVQKL  | FALSE  | TRUE           | FALSE              | 18.41                    |
| P11021  | 279      | BKDNBAVQKLBB  | FALSE  | TRUE           | FALSE              | 10.7                     |
| P11021  | 280      | KDNBAVQKLBBE  | FALSE  | TRUE           | FALSE              | 11.09                    |
| P11021  | 281      | DNBAVQKLBBEV  | FALSE  | TRUE           | FALSE              | 23.49                    |
| P11021  | 282      | NBAVQKLBBEVE  | FALSE  | TRUE           | FALSE              | 29.27                    |
| P11021  | 283      | BAVQKLBBEVEK  | FALSE  | TRUE           | FALSE              | 29.22                    |
| P11021  | 284      | AVQKLBBEVEKA  | FALSE  | TRUE           | FALSE              | 20.6                     |
| P11021  | 288      | LBBEVEKAKBAL  | FALSE  | TRUE           | FALSE              | 22.32                    |
| P11021  | 289      | BBEVEKAKBALS  | FALSE  | TRUE           | FALSE              | 20.08                    |
| P11021  | 297      | BALSSQHQABIE  | FALSE  | TRUE           | FALSE              | 12.34                    |
| P11021  | 315      | GEDFSETLTBAK  | FALSE  | TRUE           | FALSE              | 18.41                    |
| P11021  | 316      | EDFSETLTBAKF  | FALSE  | TRUE           | FALSE              | 22.81                    |
| P11021  | 317      | DFSETLTBAKFE  | FALSE  | TRUE           | FALSE              | 22.7                     |
| P11021  | 318      | FSETLTBAKFEE  | FALSE  | TRUE           | FALSE              | 31.97                    |
| P11021  | 319      | SETLTBAKFEEL  | FALSE  | TRUE           | FALSE              | 33.72                    |
| P11021  | 320      | ETLTBAKFEELN  | FALSE  | TRUE           | FALSE              | 25.91                    |
| P11021  | 321      | TLTBAKFEELNM  | FALSE  | TRUE           | FALSE              | 27.32                    |
| P11021  | 322      | LTKBAKFEELNMD | FALSE  | TRUE           | FALSE              | 23.72                    |
| P11021  | 329      | ELNMDLFBSTMK  | FALSE  | TRUE           | FALSE              | 15.65                    |
| P11021  | 330      | LNMDLFBSTMKP  | FALSE  | TRUE           | FALSE              | 19.29                    |
| P11021  | 331      | NMDLFBSTMKPV  | FALSE  | TRUE           | FALSE              | 10.86                    |
| P11021  | 332      | MDLFBSTMKPVQ  | FALSE  | TRUE           | FALSE              | 23.28                    |
| P11021  | 333      | DLFBSTMKPVQK  | FALSE  | TRUE           | FALSE              | 11.84                    |

|        |     |               |       |      |       |       |
|--------|-----|---------------|-------|------|-------|-------|
| P11021 | 335 | FBSTMKPVQKVL  | FALSE | TRUE | FALSE | 12    |
| P11021 | 377 | EFFNGKEPSBGI  | FALSE | TRUE | FALSE | 16.97 |
| P11021 | 378 | FFNGKEPSBGIN  | FALSE | TRUE | FALSE | 10.78 |
| P11021 | 379 | FNGKEPSBGINP  | FALSE | TRUE | FALSE | 16.43 |
| P11021 | 380 | NGKEPSBGINPD  | FALSE | TRUE | FALSE | 11.3  |
| P11021 | 385 | SBGINPDEAVAY  | FALSE | TRUE | FALSE | 11.15 |
| P11021 | 486 | GIPPAPBGVPQI  | FALSE | TRUE | FALSE | 13.25 |
| P11021 | 556 | KEBIDTBNELES  | FALSE | TRUE | FALSE | 13.7  |
| P11021 | 557 | EBIDTBNELESY  | FALSE | TRUE | FALSE | 15.73 |
| P11021 | 558 | BIDTBNELESYA  | FALSE | TRUE | FALSE | 12.27 |
| P11021 | 559 | IDTBNELESYAY  | FALSE | TRUE | FALSE | 13.03 |
| O15143 | 73  | DBNAYVWTLKGB  | FALSE | TRUE | FALSE | 10.46 |
| O15143 | 91  | VILBINBAABCV  | FALSE | TRUE | FALSE | 10.34 |
| O15143 | 92  | ILBINBAABCVB  | FALSE | TRUE | FALSE | 15.07 |
| O15143 | 93  | LBINBAABCVBW  | FALSE | TRUE | FALSE | 13.05 |
| O15143 | 96  | NBAABCVBWAPN  | FALSE | TRUE | FALSE | 16.08 |
| O15143 | 97  | BAABCVBWAPNE  | FALSE | TRUE | FALSE | 18.3  |
| O15143 | 98  | AABCVBWAPNEN  | FALSE | TRUE | FALSE | 11.43 |
| O15143 | 99  | ABCVBWAPNENK  | FALSE | TRUE | FALSE | 17.25 |
| O15143 | 100 | BCVBWAPNENKF  | FALSE | TRUE | FALSE | 10.74 |
| O15143 | 156 | LLAAGSCDFKCB  | FALSE | TRUE | FALSE | 10.81 |
| O15143 | 276 | AGMLSFGGBLDV  | FALSE | TRUE | FALSE | 10.3  |
| O15143 | 280 | SFGGBLDVPKQS  | FALSE | TRUE | FALSE | 10.13 |
| O15143 | 281 | FGGBLDVPKQSS  | FALSE | TRUE | FALSE | 14.92 |
| O15143 | 282 | GGBLDVPKQSSQ  | FALSE | TRUE | FALSE | 10.38 |
| O15143 | 283 | GBLDVPKQSSQB  | FALSE | TRUE | FALSE | 26.23 |
| O15143 | 284 | BLDVPKQSSQBG  | FALSE | TRUE | FALSE | 13.04 |
| O15143 | 289 | KQSSQBGLTABE  | FALSE | TRUE | FALSE | 69.15 |
| O15143 | 290 | QSSQBGLTABEB  | FALSE | TRUE | FALSE | 33.2  |
| O15143 | 291 | SSQBGLTABEBF  | FALSE | TRUE | FALSE | 44.77 |
| O15143 | 292 | SQBGLTABEBFQ  | FALSE | TRUE | FALSE | 54.97 |
| O15143 | 293 | QBGLTABEBFQN  | FALSE | TRUE | FALSE | 51.57 |
| O15143 | 294 | BGLTABEBFQNL  | FALSE | TRUE | FALSE | 23.53 |
| O15143 | 295 | GLTABEBFQNLD  | FALSE | TRUE | FALSE | 18.62 |
| O15143 | 296 | LTABEBFQNLDK  | FALSE | TRUE | FALSE | 33.66 |
| O15143 | 297 | TABEBFQNLDKK  | FALSE | TRUE | FALSE | 21.32 |
| O15143 | 298 | ABEBFQNLDKKA  | FALSE | TRUE | FALSE | 11.63 |
| P63261 | 26  | APBAVFPISIVGB | FALSE | TRUE | FALSE | 11.16 |
| P63261 | 33  | SIVGBPBHQGVM  | FALSE | TRUE | FALSE | 10.74 |
| P63261 | 36  | GBPBHQGVMVGM  | FALSE | TRUE | FALSE | 12.75 |
| P63261 | 37  | BPBHQGVMVGMG  | FALSE | TRUE | FALSE | 10.78 |
| P63261 | 38  | PBHQGVMVGMGC  | FALSE | TRUE | FALSE | 11.72 |
| P63261 | 54  | VGDEAQSKBGIL  | FALSE | TRUE | FALSE | 10.46 |
| P63261 | 55  | GDEAQSKBGILT  | FALSE | TRUE | FALSE | 12.45 |
| P63261 | 91  | YNELBVAPEEHP  | FALSE | TRUE | FALSE | 10.06 |
| P63261 | 139 | VLSLYASGBTG   | FALSE | TRUE | FALSE | 10.33 |
| P63261 | 140 | LSLYASGBTG    | FALSE | TRUE | FALSE | 11.99 |
| P63261 | 141 | SLYASGBTGIV   | FALSE | TRUE | FALSE | 12.96 |
| P63261 | 142 | LYASGBTGIVM   | FALSE | TRUE | FALSE | 16.43 |
| P63261 | 143 | YASGBTGIVMD   | FALSE | TRUE | FALSE | 14.12 |
| P63261 | 145 | SGBTTGIVMDSG  | FALSE | TRUE | FALSE | 10.27 |
| P63261 | 175 | ILBLDLAGBDLT  | FALSE | TRUE | FALSE | 12.1  |

|        |     |               |       |      |       |       |
|--------|-----|---------------|-------|------|-------|-------|
| P63261 | 176 | LBLDLAGBDLTD  | FALSE | TRUE | FALSE | 11.94 |
| P63261 | 177 | BLDLAGBDLTDY  | FALSE | TRUE | FALSE | 11.1  |
| P63261 | 196 | BGYSFTTTAEBE  | FALSE | TRUE | FALSE | 15.72 |
| P63261 | 201 | TTTAEBEIVBDI  | FALSE | TRUE | FALSE | 12.88 |
| P63261 | 202 | TTAEBEIVBDIK  | FALSE | TRUE | FALSE | 17.09 |
| P63261 | 203 | TAEBEIVBDIKE  | FALSE | TRUE | FALSE | 12.14 |
| P63261 | 204 | AEBEIVBDIKEK  | FALSE | TRUE | FALSE | 10.6  |
| P63261 | 205 | EBEIVBDIKEKL  | FALSE | TRUE | FALSE | 11.3  |
| P63261 | 251 | GNEBFBCPEALF  | FALSE | TRUE | FALSE | 11.3  |
| P63261 | 254 | BFBCPEALFQPS  | FALSE | TRUE | FALSE | 10.84 |
| P63261 | 304 | TMYPGIADBMQK  | FALSE | TRUE | FALSE | 10.24 |
| P63261 | 306 | YPGIADBMQKEI  | FALSE | TRUE | FALSE | 10.16 |
| P63261 | 362 | YDESGPSIVHBK  | FALSE | TRUE | FALSE | 12.82 |
| P01009 | 61  | LYBQLAHQSNST  | FALSE | TRUE | FALSE | 12.15 |
| P01009 | 62  | YBQLAHQSNSTN  | FALSE | TRUE | FALSE | 14.38 |
| P01009 | 299 | FLENEDBBSASL  | FALSE | TRUE | FALSE | 12.16 |
| P01009 | 300 | LENEDBBSASLH  | FALSE | TRUE | FALSE | 11.07 |
| P01009 | 301 | ENEDBBSASLHL  | FALSE | TRUE | FALSE | 11.76 |
| P01009 | 302 | NEDBBSASLHLP  | FALSE | TRUE | FALSE | 10.55 |
| P01009 | 303 | EDBBSASLHLPK  | FALSE | TRUE | FALSE | 15.48 |
| P01009 | 304 | DBBSASLHLPKL  | FALSE | TRUE | FALSE | 15.27 |
| P01023 | 61  | SASLESVBGNBS  | FALSE | TRUE | FALSE | 12.31 |
| P01023 | 62  | ASLESVBGNBSL  | FALSE | TRUE | FALSE | 14.19 |
| P01023 | 63  | SLESVBGNBSLF  | FALSE | TRUE | FALSE | 13.63 |
| P01023 | 64  | LESVBGNBSLFT  | FALSE | TRUE | FALSE | 17.17 |
| P01023 | 65  | ESVBGNBSLFTD  | FALSE | TRUE | FALSE | 14.2  |
| P01023 | 66  | SVBGNBSLFTDL  | FALSE | TRUE | FALSE | 12.41 |
| P01023 | 67  | VBGNBSLFTDLE  | FALSE | TRUE | FALSE | 17.87 |
| P01023 | 111 | TQEFKKBTTVMV  | FALSE | TRUE | FALSE | 15.12 |
| P01023 | 330 | GTVVELTGQBQSS | FALSE | TRUE | FALSE | 15.91 |
| P01023 | 331 | TVVELTGQBQSSE | FALSE | TRUE | FALSE | 14.18 |
| P01023 | 332 | VVELTGQBQSSEI | FALSE | TRUE | FALSE | 17.9  |
| P01023 | 333 | VELTGQBQSSEIT | FALSE | TRUE | FALSE | 17.34 |
| P01023 | 334 | ELTGQBQSSEITB | FALSE | TRUE | FALSE | 34.85 |
| P01023 | 335 | LTGQBQSSEITBT | FALSE | TRUE | FALSE | 46.86 |
| P01023 | 336 | TGQBQSSEITBTI | FALSE | TRUE | FALSE | 30.24 |
| P01023 | 337 | GBQSSEITBTIT  | FALSE | TRUE | FALSE | 27.7  |
| P01023 | 338 | BQSSEITBTITK  | FALSE | TRUE | FALSE | 16.38 |
| P01023 | 356 | DSHFBQGIPFFG  | FALSE | TRUE | FALSE | 10.92 |
| P01023 | 359 | FBQGIPFFGQVB  | FALSE | TRUE | FALSE | 17.07 |
| P01023 | 384 | IFIBGNEANYYS  | FALSE | TRUE | FALSE | 13.87 |
| P01023 | 385 | FIBGNEANYYSN  | FALSE | TRUE | FALSE | 17.79 |
| P01023 | 386 | IBGNEANYYSNA  | FALSE | TRUE | FALSE | 15.96 |
| P01023 | 387 | BGNEANYYSNAT  | FALSE | TRUE | FALSE | 10.71 |
| P01023 | 417 | TSLTVBVNYKDB  | FALSE | TRUE | FALSE | 11.54 |
| P01023 | 418 | SLTVBVNYKDBS  | FALSE | TRUE | FALSE | 11.02 |
| P01023 | 422 | BVNYKDBSPCYG  | FALSE | TRUE | FALSE | 12.2  |
| P01023 | 706 | GFYESDVMGBGH  | FALSE | TRUE | FALSE | 11.89 |
| P01023 | 707 | FYESDVMGBGHA  | FALSE | TRUE | FALSE | 10.37 |
| P01023 | 708 | YESDVMGBGHAB  | FALSE | TRUE | FALSE | 12.53 |
| P01023 | 709 | ESDVMGBGHABL  | FALSE | TRUE | FALSE | 15.17 |
| P01023 | 710 | SDVMGBGHABLV  | FALSE | TRUE | FALSE | 19.54 |

|        |      |               |       |      |       |       |
|--------|------|---------------|-------|------|-------|-------|
| P01023 | 711  | DVMGBGHABLVH  | FALSE | TRUE | FALSE | 13.47 |
| P01023 | 712  | VMGBGHABLVHV  | FALSE | TRUE | FALSE | 11.5  |
| P01023 | 713  | MGBGHABLVHVE  | FALSE | TRUE | FALSE | 14.17 |
| P01023 | 714  | GBGHABLVHVEE  | FALSE | TRUE | FALSE | 15.07 |
| P01023 | 715  | BGHABLVHVEEP  | FALSE | TRUE | FALSE | 24.27 |
| P01023 | 795  | ELTMPYSVIBGE  | FALSE | TRUE | FALSE | 10.25 |
| P01023 | 796  | LTMPYSVIBGEA  | FALSE | TRUE | FALSE | 10.08 |
| P01023 | 797  | TMPYSVIBGEAF  | FALSE | TRUE | FALSE | 12.38 |
| P01023 | 798  | MPYSVIBGEAFT  | FALSE | TRUE | FALSE | 15.92 |
| P01023 | 800  | YSVIBGEAFTLK  | FALSE | TRUE | FALSE | 12.18 |
| P01023 | 801  | SVIBGEAFTLKA  | FALSE | TRUE | FALSE | 11.86 |
| P01023 | 843  | QAPHCICANGBQ  | FALSE | TRUE | FALSE | 12.13 |
| P01023 | 844  | APHCICANGBQT  | FALSE | TRUE | FALSE | 18.56 |
| P01023 | 845  | PHCICANGBQTV  | FALSE | TRUE | FALSE | 16.68 |
| P01023 | 846  | HCICANGBQTVS  | FALSE | TRUE | FALSE | 18.17 |
| P01023 | 847  | CICANGBQTVSW  | FALSE | TRUE | FALSE | 16.12 |
| P01023 | 848  | ICANGBQTVSWA  | FALSE | TRUE | FALSE | 10.35 |
| P01023 | 849  | CANGBQTVSWAV  | FALSE | TRUE | FALSE | 13.19 |
| P01023 | 850  | ANGBQTVSWAVT  | FALSE | TRUE | FALSE | 18.3  |
| P01023 | 851  | NGBQTVSWAVTP  | FALSE | TRUE | FALSE | 17.31 |
| P01023 | 852  | GBQTVSWAVTPK  | FALSE | TRUE | FALSE | 10.9  |
| P01023 | 1004 | AIGYLNTGYQBQ  | FALSE | TRUE | FALSE | 10.73 |
| P01023 | 1013 | QBQLNYKHYDGS  | FALSE | TRUE | FALSE | 13.55 |
| P01023 | 1023 | GSYTFGEBYGB   | FALSE | TRUE | FALSE | 14.57 |
| P01023 | 1024 | SYSTFGEBYGBN  | FALSE | TRUE | FALSE | 17.04 |
| P01023 | 1025 | YSTFGEBYGBNQ  | FALSE | TRUE | FALSE | 18.17 |
| P01023 | 1026 | STFGEBYGBNQG  | FALSE | TRUE | FALSE | 22.2  |
| P01023 | 1027 | TFGEBYGBNQGN  | FALSE | TRUE | FALSE | 29.63 |
| P01023 | 1028 | FGEBYGBNQGNT  | FALSE | TRUE | FALSE | 30.81 |
| P01023 | 1029 | GEBYGBNQGNTW  | FALSE | TRUE | FALSE | 19.93 |
| P01023 | 1030 | EBYGBNQGNTWL  | FALSE | TRUE | FALSE | 18.83 |
| P01023 | 1031 | BYGBNQGNTWLT  | FALSE | TRUE | FALSE | 16.46 |
| P01023 | 1032 | YGBNQGNTWLTA  | FALSE | TRUE | FALSE | 13.35 |
| P01023 | 1069 | WLSQBQKDNGCF  | FALSE | TRUE | FALSE | 10.4  |
| P01023 | 1070 | LSQBQKDNGCFB  | FALSE | TRUE | FALSE | 25.37 |
| P01023 | 1071 | SQBQKDNGCFBS  | FALSE | TRUE | FALSE | 35.28 |
| P01023 | 1072 | QBQKDNGCFBSS  | FALSE | TRUE | FALSE | 30.9  |
| P01023 | 1073 | BQKDNGCFBSSG  | FALSE | TRUE | FALSE | 16    |
| P01023 | 1260 | ALSKYGAATFTB  | FALSE | TRUE | FALSE | 10.35 |
| P01023 | 1261 | LSKYGAATFTBT  | FALSE | TRUE | FALSE | 10.67 |
| P01023 | 1262 | SKYGAATFTBTG  | FALSE | TRUE | FALSE | 22.44 |
| P01023 | 1264 | YGAATFTBTGKA  | FALSE | TRUE | FALSE | 15.39 |
| P01023 | 1265 | GAATFTBTGKAA  | FALSE | TRUE | FALSE | 12.62 |
| P01023 | 1266 | AATFTBTGKAAQ  | FALSE | TRUE | FALSE | 21.2  |
| P01023 | 1267 | ATFTBTGKAAQV  | FALSE | TRUE | FALSE | 29.36 |
| P01023 | 1268 | TFTBTGKAAQVT  | FALSE | TRUE | FALSE | 25.33 |
| P01023 | 1269 | FTBTGKAAQVTI  | FALSE | TRUE | FALSE | 19.14 |
| P01023 | 1364 | SLSVSYTGSSBSA | FALSE | TRUE | FALSE | 12.7  |
| P01023 | 1365 | LSVSYTGSSBSAS | FALSE | TRUE | FALSE | 12.66 |
| P01023 | 1366 | SVSYTGSSBSASN | FALSE | TRUE | FALSE | 14.27 |
| P01023 | 1367 | VSYTGSSBSASN  | FALSE | TRUE | FALSE | 16.9  |
| P01023 | 1368 | SYTGSSBSASNMA | FALSE | TRUE | FALSE | 10.09 |

|        |      |              |       |      |       |        |
|--------|------|--------------|-------|------|-------|--------|
| P01023 | 1369 | YTGSBSASNMAI | FALSE | TRUE | FALSE | 11.06  |
| P01023 | 1400 | EBSNHVSBTEVS | FALSE | TRUE | FALSE | 10.93  |
| P01023 | 1401 | BSNHVSBTEVSS | FALSE | TRUE | FALSE | 12.64  |
| P06733 | 2    | SILKIHABEIFD | FALSE | TRUE | FALSE | 14.97  |
| P06733 | 3    | ILKIHABEIFDS | FALSE | TRUE | FALSE | 33.41  |
| P06733 | 4    | LKIHABEIFDSB | FALSE | TRUE | FALSE | 86.03  |
| P06733 | 5    | KIHABEIFDSBG | FALSE | TRUE | FALSE | 100.34 |
| P06733 | 6    | IHABEIFDSBGN | FALSE | TRUE | FALSE | 46.12  |
| P06733 | 7    | HABEIFDSBGNP | FALSE | TRUE | FALSE | 92.05  |
| P06733 | 8    | ABEIFDSBGNPT | FALSE | TRUE | FALSE | 94.99  |
| P06733 | 9    | BEIFDSBGNPTV | FALSE | TRUE | FALSE | 84.6   |
| P06733 | 10   | EIFDSBGNPTVE | FALSE | TRUE | FALSE | 44.79  |
| P06733 | 11   | IFDSBGNPTVEV | FALSE | TRUE | FALSE | 58.11  |
| P06733 | 12   | FDSBGNPTVEVD | FALSE | TRUE | FALSE | 48.66  |
| P06733 | 13   | DSBGNPTVEVDL | FALSE | TRUE | FALSE | 17.42  |
| P06733 | 14   | SBGNPTVEVDLF | FALSE | TRUE | FALSE | 15.84  |
| P06733 | 30   | LFBAAVPSGAST | FALSE | TRUE | FALSE | 17.13  |
| P06733 | 31   | FBAAVPSGASTG | FALSE | TRUE | FALSE | 19.65  |
| P06733 | 46   | ALELBDNDKTTY | FALSE | TRUE | FALSE | 12.85  |
| P06733 | 130  | LYBHIADLAGNS | FALSE | TRUE | FALSE | 14.77  |
| P06733 | 131  | YBHIADLAGNSE | FALSE | TRUE | FALSE | 10.65  |
| P06733 | 169  | MILPVGAANFBE | FALSE | TRUE | FALSE | 11.85  |
| P06733 | 170  | ILPVGAANFBEA | FALSE | TRUE | FALSE | 10.07  |
| P06733 | 171  | LPVGAANFBEAM | FALSE | TRUE | FALSE | 14.75  |
| P06733 | 172  | PVGAANFBEAMB | FALSE | TRUE | FALSE | 14.12  |
| P06733 | 173  | VGAANFBEAMBI | FALSE | TRUE | FALSE | 26.99  |
| P06733 | 174  | GAANFBEAMBIG | FALSE | TRUE | FALSE | 25.14  |
| P06733 | 175  | AANFBEAMBIGA | FALSE | TRUE | FALSE | 26.43  |
| P06733 | 176  | ANFBEAMBIGAE | FALSE | TRUE | FALSE | 22.01  |
| P06733 | 177  | NFBEAMBIGAEV | FALSE | TRUE | FALSE | 35.17  |
| P06733 | 178  | FBEAMBIGAEVY | FALSE | TRUE | FALSE | 43.78  |
| P06733 | 179  | BEAMBIGAEVYH | FALSE | TRUE | FALSE | 20.68  |
| P06733 | 181  | AMBIGAEVYHNL | FALSE | TRUE | FALSE | 12.09  |
| P06733 | 245  | DVAASEFFBSGK | FALSE | TRUE | FALSE | 23.78  |
| P06733 | 246  | VAASEFFBSGKY | FALSE | TRUE | FALSE | 17.1   |
| P06733 | 247  | AASEFFBSGKYD | FALSE | TRUE | FALSE | 46.57  |
| P06733 | 248  | ASEFFBSGKYDL | FALSE | TRUE | FALSE | 34.49  |
| P06733 | 249  | SEFFBSGKYDLD | FALSE | TRUE | FALSE | 40.28  |
| P06733 | 250  | EFFBSGKYDLDF | FALSE | TRUE | FALSE | 21.17  |
| P06733 | 251  | FFBSGKYDLDFK | FALSE | TRUE | FALSE | 12.67  |
| P06733 | 252  | FBSGKYDLDFKS | FALSE | TRUE | FALSE | 14.47  |
| P06733 | 364  | GWGVMVSHBSGE | FALSE | TRUE | FALSE | 10.5   |
| P06733 | 365  | WGVMVSHBSGET | FALSE | TRUE | FALSE | 10.55  |
| P06733 | 368  | MVSHBSGETEDT | FALSE | TRUE | FALSE | 10.67  |
| P06733 | 369  | VSHBSGETEDTF | FALSE | TRUE | FALSE | 15.37  |
| P06733 | 396  | GAPCBSEBLAKY | FALSE | TRUE | FALSE | 13.69  |
| P06733 | 397  | APCBSEBLAKYN | FALSE | TRUE | FALSE | 13.21  |
| P06733 | 399  | CBSEBLAKYNQL | FALSE | TRUE | FALSE | 12.49  |
| P06733 | 401  | SEBLAKYNQLLB | FALSE | TRUE | FALSE | 10.32  |
| P06733 | 421  | AKFAGBNFBNPL | FALSE | TRUE | FALSE | 18.34  |
| P06733 | 422  | KFAGBNFBNPLA | FALSE | TRUE | FALSE | 30.03  |
| P06733 | 423  | FAGBNFBNPLAK | FALSE | TRUE | FALSE | 24.41  |

|        |     |              |       |      |       |       |
|--------|-----|--------------|-------|------|-------|-------|
| P04083 | 66  | IDILTKBNNAQB | FALSE | TRUE | FALSE | 17.72 |
| P04083 | 67  | DILTKBNNAQBQ | FALSE | TRUE | FALSE | 24.88 |
| P04083 | 68  | ILTKBNNAQBQQ | FALSE | TRUE | FALSE | 11.85 |
| P04083 | 73  | NNAQBQQIKAAY | FALSE | TRUE | FALSE | 10.17 |
| P04083 | 76  | QBQQIKAAYLQE | FALSE | TRUE | FALSE | 35.36 |
| P04083 | 77  | BQQIKAAYLQET | FALSE | TRUE | FALSE | 11.94 |
| P04083 | 120 | ADELBAAMKGLG | FALSE | TRUE | FALSE | 10.03 |
| P04083 | 121 | DELBAAMKGLGT | FALSE | TRUE | FALSE | 13.68 |
| P04083 | 122 | ELBAAMKGLGTD | FALSE | TRUE | FALSE | 14.26 |
| P04083 | 138 | IEILASBTNKEI | FALSE | TRUE | FALSE | 11.35 |
| P04083 | 139 | EILASBTNKEIB | FALSE | TRUE | FALSE | 23.62 |
| P04083 | 140 | ILASBTNKEIBD | FALSE | TRUE | FALSE | 24.15 |
| P04083 | 141 | LASBTNKEIBDI | FALSE | TRUE | FALSE | 27.26 |
| P04083 | 142 | ASBTNKEIBDIN | FALSE | TRUE | FALSE | 16.91 |
| P04083 | 143 | SBTNKEIBDINB | FALSE | TRUE | FALSE | 19.28 |
| P04083 | 144 | BTNKEIBDINBV | FALSE | TRUE | FALSE | 11.5  |
| P04083 | 146 | NKEIBDINBVYB | FALSE | TRUE | FALSE | 10.04 |
| P04083 | 147 | KEIBDINBVYBE | FALSE | TRUE | FALSE | 22.79 |
| P04083 | 148 | EIBDINBVYBEE | FALSE | TRUE | FALSE | 17.33 |
| P04083 | 149 | IBDINBVYBEEL | FALSE | TRUE | FALSE | 28.77 |
| P04083 | 150 | BDINBVYBEELK | FALSE | TRUE | FALSE | 36.73 |
| P04083 | 151 | DINBVYBEELKB | FALSE | TRUE | FALSE | 37.05 |
| P04083 | 152 | INBVYBEELKBD | FALSE | TRUE | FALSE | 47.28 |
| P04083 | 153 | NBVYBEELKBDL | FALSE | TRUE | FALSE | 37.16 |
| P04083 | 154 | BVYBEELKBDLA | FALSE | TRUE | FALSE | 32.61 |
| P04083 | 155 | VYBEELKBDLAK | FALSE | TRUE | FALSE | 34.27 |
| P04083 | 156 | YBEELKBDLAKD | FALSE | TRUE | FALSE | 36.71 |
| P04083 | 157 | BEELKBDLAKDI | FALSE | TRUE | FALSE | 18.06 |
| P04083 | 176 | FBNALLSLAKGD | FALSE | TRUE | FALSE | 16.58 |
| P04083 | 177 | BNALLSLAKGDB | FALSE | TRUE | FALSE | 10.87 |
| P04083 | 201 | SDABALYEAGEB | FALSE | TRUE | FALSE | 10.38 |
| P04083 | 202 | DABALYEAGEBB | FALSE | TRUE | FALSE | 10.9  |
| P04083 | 203 | ABALYEAGEBBK | FALSE | TRUE | FALSE | 15.91 |
| P04083 | 204 | BALYEAGEBBKG | FALSE | TRUE | FALSE | 16.55 |
| P04083 | 205 | ALYEAGEBBKGT | FALSE | TRUE | FALSE | 13.89 |
| P04083 | 207 | YEAGEBBKGTDV | FALSE | TRUE | FALSE | 10.94 |
| P04083 | 209 | AGEBBKGTDVNV | FALSE | TRUE | FALSE | 16.13 |
| P04083 | 210 | GEBBKGTDVNVF | FALSE | TRUE | FALSE | 20.04 |
| P04083 | 211 | EBBKGTDVNVFN | FALSE | TRUE | FALSE | 17.57 |
| P04083 | 223 | TILTTBSYPQLB | FALSE | TRUE | FALSE | 24.38 |
| P04083 | 224 | ILTTBSYPQLBB | FALSE | TRUE | FALSE | 25.08 |
| P04083 | 225 | LTTBSYPQLBBV | FALSE | TRUE | FALSE | 24.11 |
| P04083 | 227 | TBSYPQLBBVFQ | FALSE | TRUE | FALSE | 13.39 |
| P04083 | 298 | BIMVSBSEIDMN | FALSE | TRUE | FALSE | 11.27 |
| P01008 | 68  | SEQKIPEATNBB | FALSE | TRUE | FALSE | 10.96 |
| P01008 | 71  | KIPEATNBBVWE | FALSE | TRUE | FALSE | 12.6  |
| P01008 | 72  | IPEATNBBVWEL | FALSE | TRUE | FALSE | 11.34 |
| P01008 | 74  | EATNBBVWELSK | FALSE | TRUE | FALSE | 13.36 |
| P01008 | 75  | ATNBBVWELSKA | FALSE | TRUE | FALSE | 14.17 |
| P01008 | 76  | TNBBVWELSKAN | FALSE | TRUE | FALSE | 15.21 |
| P01008 | 77  | NBBVWELSKANS | FALSE | TRUE | FALSE | 11.64 |
| P01008 | 78  | BBVWELSKANSB | FALSE | TRUE | FALSE | 27.43 |

|        |     |              |       |      |       |       |
|--------|-----|--------------|-------|------|-------|-------|
| P01008 | 79  | BVWELSKANSBF | FALSE | TRUE | FALSE | 12.14 |
| P01008 | 209 | ENAEQSBAAINK | FALSE | TRUE | FALSE | 15.3  |
| P01008 | 210 | NAEQSBAAINKW | FALSE | TRUE | FALSE | 15.41 |
| P01008 | 211 | AEQSBAAINKWV | FALSE | TRUE | FALSE | 12.3  |
| P01008 | 212 | EQSBAAINKWVS | FALSE | TRUE | FALSE | 17.99 |
| P01008 | 213 | QSBAAINKWVSN | FALSE | TRUE | FALSE | 19.78 |
| P01008 | 225 | KTEGBITDVIPS | FALSE | TRUE | FALSE | 10.17 |
| P01008 | 263 | PENTBKELFYKA | FALSE | TRUE | FALSE | 10.47 |
| P01008 | 264 | ENTBKELFYKAD | FALSE | TRUE | FALSE | 13.34 |
| P01008 | 265 | NTBKELFYKADG | FALSE | TRUE | FALSE | 13.42 |
| P01008 | 266 | TBKELFYKADGE | FALSE | TRUE | FALSE | 15.57 |
| P01008 | 282 | SMMYQEGKFBYB | FALSE | TRUE | FALSE | 15.71 |
| P01008 | 283 | MMYQEGKFBYBB | FALSE | TRUE | FALSE | 14.15 |
| P01008 | 284 | MYQEGKFBYBBV | FALSE | TRUE | FALSE | 14.64 |
| P01008 | 285 | YQEGKFBYBBVA | FALSE | TRUE | FALSE | 11.24 |
| P01008 | 286 | QEGKFBYBBVAE | FALSE | TRUE | FALSE | 26.56 |
| P01008 | 287 | EGKFBYBBVAEG | FALSE | TRUE | FALSE | 27.89 |
| P01008 | 288 | GKFBYBBVAEGT | FALSE | TRUE | FALSE | 36.3  |
| P01008 | 289 | KFBYBBVAEGTQ | FALSE | TRUE | FALSE | 41.67 |
| P01008 | 290 | FBYBBVAEGTQV | FALSE | TRUE | FALSE | 39.23 |
| P01008 | 291 | BYBBVAEGTQVL | FALSE | TRUE | FALSE | 22.38 |
| P01008 | 292 | YBBVAEGTQVLE | FALSE | TRUE | FALSE | 10.71 |
| P01008 | 349 | VVHMPBFBIEDG | FALSE | TRUE | FALSE | 13.41 |
| P01008 | 351 | HMPBFBIEDGFS | FALSE | TRUE | FALSE | 17.11 |
| P01008 | 352 | MPBFBIEDGFSL | FALSE | TRUE | FALSE | 15.07 |
| P01008 | 353 | PBFBIEDGFSLK | FALSE | TRUE | FALSE | 13.59 |
| P01008 | 354 | BFBIEDGFSLKE | FALSE | TRUE | FALSE | 14.15 |
| P01008 | 420 | VVIAGBSLNPNB | FALSE | TRUE | FALSE | 11.35 |
| P01008 | 421 | VIAGBSLNPNBV | FALSE | TRUE | FALSE | 12.85 |
| P01008 | 422 | IAGBSLNPNBVT | FALSE | TRUE | FALSE | 15.35 |
| P01008 | 423 | AGBSLNPNBVTF | FALSE | TRUE | FALSE | 16.9  |
| P02647 | 16  | SQABHFWQQDEP | FALSE | TRUE | FALSE | 10.39 |
| P02647 | 17  | QABHFWQQDEPP | FALSE | TRUE | FALSE | 10.76 |
| P02647 | 49  | SGBDYVSQFEGS | FALSE | TRUE | FALSE | 12.41 |
| P02647 | 75  | DSVTSTFSKLBE | FALSE | TRUE | FALSE | 13.96 |
| P02647 | 76  | SVTSTFSKLBEQ | FALSE | TRUE | FALSE | 15.29 |
| P02647 | 77  | VTSTFSKLBEQL | FALSE | TRUE | FALSE | 14.91 |
| P02647 | 78  | TSTFSKLBEQLG | FALSE | TRUE | FALSE | 17.68 |
| P02647 | 79  | STFSKLBEQLGP | FALSE | TRUE | FALSE | 17.87 |
| P02647 | 80  | TFSKLBEQLGPV | FALSE | TRUE | FALSE | 19.79 |
| P02647 | 81  | FSKLBEQLGPVT | FALSE | TRUE | FALSE | 30.35 |
| P02647 | 82  | SKLBEQLGPVTQ | FALSE | TRUE | FALSE | 17.84 |
| P02647 | 83  | KLBEQLGPVTQE | FALSE | TRUE | FALSE | 20.48 |
| P02647 | 84  | LBEQLGPVTQEF | FALSE | TRUE | FALSE | 12.52 |
| P02647 | 105 | GLBQEMSKDLEE | FALSE | TRUE | FALSE | 10.59 |
| P02647 | 130 | KKWQEEMELYBQ | FALSE | TRUE | FALSE | 10.22 |
| P02647 | 132 | WQEEMELYBQKV | FALSE | TRUE | FALSE | 10.09 |
| P02647 | 136 | MELYBQKVEPLB | FALSE | TRUE | FALSE | 17.28 |
| P02647 | 137 | ELYBQKVEPLBA | FALSE | TRUE | FALSE | 28.63 |
| P02647 | 138 | LYBQKVEPLBAE | FALSE | TRUE | FALSE | 17.82 |
| P02647 | 139 | YBQKVEPLBAEL | FALSE | TRUE | FALSE | 29.46 |
| P02647 | 140 | BQKVEPLBAELQ | FALSE | TRUE | FALSE | 13.93 |

|        |     |              |       |      |       |       |
|--------|-----|--------------|-------|------|-------|-------|
| P02647 | 145 | PLBAELQEGABQ | FALSE | TRUE | FALSE | 14.9  |
| P02647 | 146 | LBAELQEGABQK | FALSE | TRUE | FALSE | 17.68 |
| P02647 | 147 | BAELQEGABQKL | FALSE | TRUE | FALSE | 20.53 |
| P02647 | 148 | AELQEGABQKLH | FALSE | TRUE | FALSE | 11.68 |
| P02647 | 149 | ELQEGABQKLHE | FALSE | TRUE | FALSE | 12.14 |
| P02647 | 150 | LQEGABQKLHEL | FALSE | TRUE | FALSE | 23.51 |
| P02647 | 151 | QEGABQKLHELQ | FALSE | TRUE | FALSE | 31.82 |
| P02647 | 152 | EGABQKLHELQE | FALSE | TRUE | FALSE | 15.15 |
| P02647 | 153 | GABQKLHELQEK | FALSE | TRUE | FALSE | 29.64 |
| P02647 | 154 | ABQKLHELQEKL | FALSE | TRUE | FALSE | 13.47 |
| P02647 | 173 | BDBABAHVDALB | FALSE | TRUE | FALSE | 16.23 |
| P02647 | 174 | DBABAHVDALBT | FALSE | TRUE | FALSE | 22.48 |
| P02647 | 175 | BABAHVDALBTH | FALSE | TRUE | FALSE | 24.57 |
| P02647 | 176 | ABAHVDALBTHL | FALSE | TRUE | FALSE | 16.57 |
| P02647 | 183 | LBTHLAPYSDEL | FALSE | TRUE | FALSE | 10.28 |
| P02647 | 184 | BTHLAPYSDELB | FALSE | TRUE | FALSE | 11.03 |
| P02647 | 186 | HLAPYSDELBQB | FALSE | TRUE | FALSE | 14.95 |
| P02647 | 187 | LAPYSDELBQBL | FALSE | TRUE | FALSE | 14.49 |
| P02647 | 188 | APYSDELBQBLA | FALSE | TRUE | FALSE | 15.35 |
| P02647 | 190 | YSDELBQBLAAB | FALSE | TRUE | FALSE | 13.79 |
| P02647 | 191 | SDELBQBLAABL | FALSE | TRUE | FALSE | 11.43 |
| P02647 | 192 | DELBQBLAABLE | FALSE | TRUE | FALSE | 11.88 |
| P02647 | 193 | ELBQBLAABLEA | FALSE | TRUE | FALSE | 15.47 |
| P02647 | 194 | LBQBLAABLEAL | FALSE | TRUE | FALSE | 13.81 |
| P02647 | 195 | BQBLAABLEALK | FALSE | TRUE | FALSE | 16.18 |
| P02647 | 196 | QBLAABLEALKE | FALSE | TRUE | FALSE | 11.84 |
| P02647 | 237 | DLBQGLLPVLES | FALSE | TRUE | FALSE | 21.93 |
| P02647 | 238 | LBQGLLPVLESF | FALSE | TRUE | FALSE | 11.63 |
| P06727 | 16  | AGABAEVSADQV | FALSE | TRUE | FALSE | 10.14 |
| P06727 | 108 | ELBABLLPHANE | FALSE | TRUE | FALSE | 18.3  |
| P06727 | 109 | LBABLLPHANEV | FALSE | TRUE | FALSE | 20.1  |
| P06727 | 110 | BABLLPHANEVS | FALSE | TRUE | FALSE | 15.25 |
| P06727 | 123 | KIGDNLBELQQB | FALSE | TRUE | FALSE | 10.58 |
| P06727 | 126 | DNLBELQQBLEP | FALSE | TRUE | FALSE | 10.24 |
| P06727 | 127 | NLBELQQBLEPY | FALSE | TRUE | FALSE | 18.87 |
| P06727 | 128 | LBELQQBLEPYA | FALSE | TRUE | FALSE | 10.8  |
| P06727 | 129 | BELQQBLEPYAD | FALSE | TRUE | FALSE | 12.58 |
| P06727 | 132 | QQBLEPYADQLB | FALSE | TRUE | FALSE | 16.43 |
| P06727 | 133 | QBLEPYADQLBT | FALSE | TRUE | FALSE | 16.77 |
| P06727 | 134 | BLEPYADQLBTQ | FALSE | TRUE | FALSE | 10.19 |
| P06727 | 145 | QVNTQAEQLBBQ | FALSE | TRUE | FALSE | 16.31 |
| P06727 | 146 | VNTQAEQLBBQL | FALSE | TRUE | FALSE | 17.1  |
| P06727 | 147 | NTQAEQLBBQLT | FALSE | TRUE | FALSE | 19.57 |
| P06727 | 148 | TQAEQLBBQLTP | FALSE | TRUE | FALSE | 22.68 |
| P06727 | 149 | QAEQLBBQLTPY | FALSE | TRUE | FALSE | 26.48 |
| P06727 | 150 | AEQLBBQLTPYA | FALSE | TRUE | FALSE | 15.75 |
| P06727 | 151 | EQLBBQLTPYAQ | FALSE | TRUE | FALSE | 34.45 |
| P06727 | 152 | QLBBQLTPYAQB | FALSE | TRUE | FALSE | 71.95 |
| P06727 | 153 | LBBQLTPYAQBM | FALSE | TRUE | FALSE | 52.54 |
| P06727 | 154 | BBQLTPYAQBME | FALSE | TRUE | FALSE | 48.71 |
| P06727 | 155 | BQLTPYAQBMEB | FALSE | TRUE | FALSE | 27.65 |
| P06727 | 156 | QLTPYAQBMEBV | FALSE | TRUE | FALSE | 16.66 |



|        |     |               |       |      |       |       |
|--------|-----|---------------|-------|------|-------|-------|
| P06727 | 157 | LTPYAQBMEBVL  | FALSE | TRUE | FALSE | 17.04 |
| P06727 | 158 | TPYAQBMEBVLB  | FALSE | TRUE | FALSE | 14.22 |
| P06727 | 159 | PYAQBMEBVLBE  | FALSE | TRUE | FALSE | 20.5  |
| P06727 | 160 | YAQBMEBVLBEN  | FALSE | TRUE | FALSE | 33.73 |
| P06727 | 161 | AQBMEBVLBENA  | FALSE | TRUE | FALSE | 13.74 |
| P06727 | 165 | EBVLBENADSLQ  | FALSE | TRUE | FALSE | 10.32 |
| P06727 | 169 | BENADSLQASLB  | FALSE | TRUE | FALSE | 11.68 |
| P06727 | 194 | VEELKGBLTPYA  | FALSE | TRUE | FALSE | 10.55 |
| P06727 | 196 | ELKGBLTPYADE  | FALSE | TRUE | FALSE | 10.95 |
| P06727 | 197 | LKGBLTPYADEF  | FALSE | TRUE | FALSE | 10.32 |
| P06727 | 218 | ELBBSLAPYAQD  | FALSE | TRUE | FALSE | 20.15 |
| P06727 | 219 | LBBSLAPYAQDT  | FALSE | TRUE | FALSE | 25.87 |
| P06727 | 220 | BBSLAPYAQDTQ  | FALSE | TRUE | FALSE | 17.53 |
| P06727 | 254 | ABISASAEELBQ  | FALSE | TRUE | FALSE | 13.35 |
| P06727 | 259 | SAEELBQBLAPL  | FALSE | TRUE | FALSE | 10.22 |
| P06727 | 261 | EELBQBLAPLAE  | FALSE | TRUE | FALSE | 15.51 |
| P06727 | 262 | ELBQBLAPLAED  | FALSE | TRUE | FALSE | 28.74 |
| P06727 | 263 | LBQBLAPLAEDV  | FALSE | TRUE | FALSE | 36.18 |
| P06727 | 264 | BQBLAPLAEDVB  | FALSE | TRUE | FALSE | 18.79 |
| P06727 | 265 | QBLAPLAEDVBG  | FALSE | TRUE | FALSE | 11.39 |
| P06727 | 270 | LAEDVBGNLBGN  | FALSE | TRUE | FALSE | 11.2  |
| P06727 | 272 | EDVBGNLBGNTE  | FALSE | TRUE | FALSE | 13.79 |
| P06727 | 273 | DVBGNLBGNTEG  | FALSE | TRUE | FALSE | 25.91 |
| P06727 | 274 | VBGNLBGNTEGL  | FALSE | TRUE | FALSE | 30.02 |
| P06727 | 275 | BGNLBGNTEGLQ  | FALSE | TRUE | FALSE | 29.49 |
| P06727 | 276 | GNLBGNTEGLQK  | FALSE | TRUE | FALSE | 19.16 |
| P06727 | 277 | NLBGNTEGLQKS  | FALSE | TRUE | FALSE | 13.06 |
| P06727 | 278 | LBGNTEGLQKSL  | FALSE | TRUE | FALSE | 18.96 |
| P06727 | 279 | BGNTEGLQKSLA  | FALSE | TRUE | FALSE | 12.13 |
| P06727 | 295 | HLDQQVEEFBBB  | FALSE | TRUE | FALSE | 12.5  |
| P06727 | 296 | LDQQVEEFBBBV  | FALSE | TRUE | FALSE | 12.73 |
| P06727 | 297 | DQQVEEFBBBVE  | FALSE | TRUE | FALSE | 17.95 |
| P06727 | 298 | QQVEEFBBBVEP  | FALSE | TRUE | FALSE | 28.16 |
| P06727 | 299 | QVEEFBBBVEPY  | FALSE | TRUE | FALSE | 31.53 |
| P06727 | 300 | VEEFBBBVEPYG  | FALSE | TRUE | FALSE | 32.26 |
| P06727 | 301 | EEFBBBVEPYGE  | FALSE | TRUE | FALSE | 29.05 |
| P06727 | 302 | EFBBBVEPYGEN  | FALSE | TRUE | FALSE | 36.3  |
| P06727 | 303 | FBBBVEPYGENF  | FALSE | TRUE | FALSE | 25.29 |
| P06727 | 304 | BBBVEPYGENFN  | FALSE | TRUE | FALSE | 20.48 |
| P06727 | 305 | BBVEPYGENFNK  | FALSE | TRUE | FALSE | 14.53 |
| P06727 | 319 | VQQMEQLBQKLG  | FALSE | TRUE | FALSE | 10.01 |
| P06727 | 320 | QQMEQLBQKLG   | FALSE | TRUE | FALSE | 11.02 |
| P06727 | 323 | EQLBQKLGPHAG  | FALSE | TRUE | FALSE | 13.03 |
| P06727 | 324 | QLBQKLGPHAGD  | FALSE | TRUE | FALSE | 15.92 |
| P06727 | 325 | LBQKLGPHAGDV  | FALSE | TRUE | FALSE | 12.28 |
| P04114 | 64  | VPGTADSBSATB  | FALSE | TRUE | FALSE | 18.43 |
| P04114 | 65  | PGTADSBSATBI  | FALSE | TRUE | FALSE | 13.89 |
| P04114 | 66  | GTADSBSATBIN  | FALSE | TRUE | FALSE | 20.39 |
| P04114 | 67  | TADSBSATBINCK | FALSE | TRUE | FALSE | 12.19 |
| P04114 | 68  | ADSBSATBINCK  | FALSE | TRUE | FALSE | 20.57 |
| P04114 | 69  | DSBSATBINCKV  | FALSE | TRUE | FALSE | 21.25 |
| P04114 | 70  | SBSATBINCKVE  | FALSE | TRUE | FALSE | 20.24 |

|        |      |               |       |      |       |       |
|--------|------|---------------|-------|------|-------|-------|
| P04114 | 71   | BSATBINCKVEL  | FALSE | TRUE | FALSE | 16.33 |
| P04114 | 127  | SBYELKLAIEPEG | FALSE | TRUE | FALSE | 12.1  |
| P04114 | 208  | DLGQCDBFKPIB  | FALSE | TRUE | FALSE | 10.59 |
| P04114 | 209  | LGQCDBFKPIBT  | FALSE | TRUE | FALSE | 11.91 |
| P04114 | 210  | GQCDBFKPIBTG  | FALSE | TRUE | FALSE | 15.14 |
| P04114 | 211  | QCDBFKPIBTGI  | FALSE | TRUE | FALSE | 13.97 |
| P04114 | 212  | CDBFKPIBTGIS  | FALSE | TRUE | FALSE | 12.85 |
| P04114 | 213  | DBFKPIBTGISP  | FALSE | TRUE | FALSE | 15.59 |
| P04114 | 291  | TPKINSBFFGEG  | FALSE | TRUE | FALSE | 12.81 |
| P04114 | 352  | VTELBGLSDEAV  | FALSE | TRUE | FALSE | 10.48 |
| P04114 | 423  | AQQLBEIFNMAB  | FALSE | TRUE | FALSE | 32.43 |
| P04114 | 424  | QQLBEIFNMABD  | FALSE | TRUE | FALSE | 26.63 |
| P04114 | 425  | QLBEIFNMABDQ  | FALSE | TRUE | FALSE | 20.34 |
| P04114 | 426  | LBEIFNMABDQB  | FALSE | TRUE | FALSE | 25.37 |
| P04114 | 427  | BEIFNMABDQBS  | FALSE | TRUE | FALSE | 24.32 |
| P04114 | 428  | EIFNMABDQBSB  | FALSE | TRUE | FALSE | 12.65 |
| P04114 | 429  | IFNMABDQBSBA  | FALSE | TRUE | FALSE | 16.33 |
| P04114 | 430  | FNMABDQBSBAT  | FALSE | TRUE | FALSE | 16.83 |
| P04114 | 431  | NMABDQBSBATL  | FALSE | TRUE | FALSE | 27.46 |
| P04114 | 432  | MABDQBSBATLY  | FALSE | TRUE | FALSE | 28.54 |
| P04114 | 433  | ABDQBSBATLYA  | FALSE | TRUE | FALSE | 31.94 |
| P04114 | 434  | BDQBSBATLYAL  | FALSE | TRUE | FALSE | 16.12 |
| P04114 | 624  | LPTVMDFBKFSB  | FALSE | TRUE | FALSE | 19.76 |
| P04114 | 625  | PTVMDFBKFSBN  | FALSE | TRUE | FALSE | 15.68 |
| P04114 | 626  | TVMDFBKFSBNY  | FALSE | TRUE | FALSE | 26.46 |
| P04114 | 627  | VMDFBKFSBNYQ  | FALSE | TRUE | FALSE | 18.62 |
| P04114 | 628  | MDFBKFSBNYQL  | FALSE | TRUE | FALSE | 21.2  |
| P04114 | 802  | GABTLQGIPQMI  | FALSE | TRUE | FALSE | 12.97 |
| P04114 | 889  | IIPDFABSGVQ   | FALSE | TRUE | FALSE | 15.44 |
| P04114 | 890  | IIPDFABSGVQM  | FALSE | TRUE | FALSE | 20.81 |
| P04114 | 891  | IPDFABSGVQMN  | FALSE | TRUE | FALSE | 20.29 |
| P04114 | 892  | PDFABSGVQMNT  | FALSE | TRUE | FALSE | 19.29 |
| P04114 | 893  | DFABSGVQMNTN  | FALSE | TRUE | FALSE | 20.43 |
| P04114 | 894  | FABSGVQMNTNF  | FALSE | TRUE | FALSE | 35.55 |
| P04114 | 895  | ABSGVQMNTNFF  | FALSE | TRUE | FALSE | 13.18 |
| P04114 | 950  | TEVIPPLIENBQ  | FALSE | TRUE | FALSE | 10.95 |
| P04114 | 951  | EVIPPLIENBQS  | FALSE | TRUE | FALSE | 13.29 |
| P04114 | 952  | VIPPLIENBQSW  | FALSE | TRUE | FALSE | 18.85 |
| P04114 | 953  | IPPLIENBQSWS  | FALSE | TRUE | FALSE | 18.92 |
| P04114 | 954  | PPLIENBQSWSV  | FALSE | TRUE | FALSE | 16.3  |
| P04114 | 955  | PLIENBQSWSVC  | FALSE | TRUE | FALSE | 10.37 |
| P04114 | 956  | LIENBQSWSVCK  | FALSE | TRUE | FALSE | 21.32 |
| P04114 | 957  | IENBQSWSVCKQ  | FALSE | TRUE | FALSE | 27.32 |
| P04114 | 958  | ENBQSWSVCKQV  | FALSE | TRUE | FALSE | 22.31 |
| P04114 | 1014 | YSVSATYELQBE  | FALSE | TRUE | FALSE | 10.22 |
| P04114 | 1019 | TYELQBEDBALV  | FALSE | TRUE | FALSE | 11.92 |
| P04114 | 1022 | LQBEDBALVDTL  | FALSE | TRUE | FALSE | 10.29 |
| P04114 | 1023 | QBEDBALVDTLK  | FALSE | TRUE | FALSE | 13.63 |
| P04114 | 1045 | TEATMTFKYNBQ  | FALSE | TRUE | FALSE | 12.3  |
| P04114 | 1046 | EATMTFKYNBQS  | FALSE | TRUE | FALSE | 16.96 |
| P04114 | 1048 | TMTFKYNBQSMT  | FALSE | TRUE | FALSE | 11.75 |
| P04114 | 1049 | MTFKYNBQSMTL  | FALSE | TRUE | FALSE | 14.17 |

|        |      |               |       |      |       |       |
|--------|------|---------------|-------|------|-------|-------|
| P04114 | 1050 | TFKYNBQSMTLS  | FALSE | TRUE | FALSE | 18.97 |
| P04114 | 1051 | FKYNBQSMTLSS  | FALSE | TRUE | FALSE | 24.46 |
| P04114 | 1052 | KYNBQSMTLSSE  | FALSE | TRUE | FALSE | 41.92 |
| P04114 | 1053 | YNBQSMTLSSEV  | FALSE | TRUE | FALSE | 23.77 |
| P04114 | 1054 | NBQSMTLSSEVQ  | FALSE | TRUE | FALSE | 15.16 |
| P04114 | 1082 | ESTEGKTSYBLT  | FALSE | TRUE | FALSE | 11.64 |
| P04114 | 1126 | IPBLQAEABSEI  | FALSE | TRUE | FALSE | 10.21 |
| P04114 | 1127 | PBLQAEABSEIL  | FALSE | TRUE | FALSE | 12.77 |
| P04114 | 1128 | BLQAEABSEILA  | FALSE | TRUE | FALSE | 10.68 |
| P04114 | 1199 | DYPKSLHMYANB  | FALSE | TRUE | FALSE | 13.77 |
| P04114 | 1205 | HMYANBLLDHBV  | FALSE | TRUE | FALSE | 16.07 |
| P04114 | 1214 | HBVPQTDMTFBH  | FALSE | TRUE | FALSE | 11.76 |
| P04114 | 1215 | BVPQTDMTFBHV  | FALSE | TRUE | FALSE | 10.41 |
| P04114 | 1323 | FKSVGFHLPSBE  | FALSE | TRUE | FALSE | 16.19 |
| P04114 | 1324 | KSVGFHLPSBEF  | FALSE | TRUE | FALSE | 17.33 |
| P04114 | 1325 | SVGFHLPSBEFQ  | FALSE | TRUE | FALSE | 13.82 |
| P04114 | 1328 | FHLPSBEFQVPT  | FALSE | TRUE | FALSE | 10.2  |
| P04114 | 1329 | HLPSBEFQVPTF  | FALSE | TRUE | FALSE | 15.97 |
| P04114 | 1330 | LPSBEFQVPTFT  | FALSE | TRUE | FALSE | 14.68 |
| P04114 | 1332 | SBEFQVPTFTIP  | FALSE | TRUE | FALSE | 13.08 |
| P04114 | 1375 | GGNTSTDHFSLB  | FALSE | TRUE | FALSE | 10.53 |
| P04114 | 1376 | GNTSTDHFSLBA  | FALSE | TRUE | FALSE | 11.17 |
| P04114 | 1378 | TSTDHFSLBABY  | FALSE | TRUE | FALSE | 10.5  |
| P04114 | 1383 | FSLBABYHMKAD  | FALSE | TRUE | FALSE | 12.24 |
| P04114 | 1384 | SLBABYHMKADS  | FALSE | TRUE | FALSE | 23.21 |
| P04114 | 1385 | LBABYHMKADSV  | FALSE | TRUE | FALSE | 24.53 |
| P04114 | 1386 | BABYHMKADSVV  | FALSE | TRUE | FALSE | 20.11 |
| P04114 | 1421 | SYDGSLBHKFLD  | FALSE | TRUE | FALSE | 11.55 |
| P04114 | 1422 | YDGSLBHKFLDS  | FALSE | TRUE | FALSE | 13.22 |
| P04114 | 1423 | DGSLBHKFLDSN  | FALSE | TRUE | FALSE | 10.46 |
| P04114 | 1502 | GLSCQBDPNTGB  | FALSE | TRUE | FALSE | 13.78 |
| P04114 | 1503 | LSCQBDPNTGBL  | FALSE | TRUE | FALSE | 11.31 |
| P04114 | 1510 | NTGBLNGESNLB  | FALSE | TRUE | FALSE | 10.6  |
| P04114 | 1511 | TGBLNGESNLBF  | FALSE | TRUE | FALSE | 19.03 |
| P04114 | 1512 | GBLNGESNLBFN  | FALSE | TRUE | FALSE | 13.8  |
| P04114 | 1532 | QITGBYEDGTLS  | FALSE | TRUE | FALSE | 15.16 |
| P04114 | 1533 | ITGBYEDGTLSL  | FALSE | TRUE | FALSE | 10.09 |
| P04114 | 1599 | BSEYQADYESLB  | FALSE | TRUE | FALSE | 13.14 |
| P04114 | 1681 | SMKLTTNGBFBE  | FALSE | TRUE | FALSE | 18.22 |
| P04114 | 1682 | MKLTTNGBFBEH  | FALSE | TRUE | FALSE | 14.48 |
| P04114 | 1683 | KLTTNGBFBEHN  | FALSE | TRUE | FALSE | 12.2  |
| P04114 | 1684 | LTTNGBFBEHNA  | FALSE | TRUE | FALSE | 23.1  |
| P04114 | 1685 | TTNGBFBEHNAK  | FALSE | TRUE | FALSE | 24.31 |
| P04114 | 1686 | TNGBFBEHNAKF  | FALSE | TRUE | FALSE | 20.44 |
| P04114 | 1687 | NGBFBEHNAKFS  | FALSE | TRUE | FALSE | 18.24 |
| P04114 | 1688 | GBFBEHNAKFSL  | FALSE | TRUE | FALSE | 13.89 |
| P04114 | 1689 | BFBEHNAKFSLD  | FALSE | TRUE | FALSE | 16.79 |
| P04114 | 1690 | FBEHNAKFSLDG  | FALSE | TRUE | FALSE | 24.19 |
| P04114 | 1856 | VAKVQGVVEFSHB | FALSE | TRUE | FALSE | 13.08 |
| P04114 | 1954 | LVSBKISAALE   | FALSE | TRUE | FALSE | 10.5  |
| P04114 | 2074 | FETLQEYFEBNB  | FALSE | TRUE | FALSE | 13.88 |
| P04114 | 2075 | ETLQEYFEBNBQ  | FALSE | TRUE | FALSE | 22.12 |

|        |      |              |       |      |       |       |
|--------|------|--------------|-------|------|-------|-------|
| P04114 | 2076 | TLQEYFEBNBQT | FALSE | TRUE | FALSE | 47.2  |
| P04114 | 2077 | LQEYFEBNBQTI | FALSE | TRUE | FALSE | 56.5  |
| P04114 | 2078 | QEYFEBNBQTII | FALSE | TRUE | FALSE | 69.93 |
| P04114 | 2079 | EYFEBNBQTIIV | FALSE | TRUE | FALSE | 29.06 |
| P04114 | 2104 | IDQFVBKYBAAL | FALSE | TRUE | FALSE | 11.92 |
| P04114 | 2105 | DQFVBKYBAALG | FALSE | TRUE | FALSE | 12.27 |
| P04114 | 2129 | FNWEBQVSHAKE | FALSE | TRUE | FALSE | 22.22 |
| P04114 | 2130 | NWEBQVSHAKEK | FALSE | TRUE | FALSE | 15.96 |
| P04114 | 2131 | WEBQVSHAKEKL | FALSE | TRUE | FALSE | 25.69 |
| P04114 | 2132 | EBQVSHAKEKLT | FALSE | TRUE | FALSE | 12.98 |
| P04114 | 2248 | WIQNVDTKYQIB | FALSE | TRUE | FALSE | 12.82 |
| P04114 | 2266 | LQQLKBHIQNID | FALSE | TRUE | FALSE | 13.05 |
| P04114 | 2267 | QQLKBHIQNIDI | FALSE | TRUE | FALSE | 23.94 |
| P04114 | 2268 | QLKBHIQNIDIQ | FALSE | TRUE | FALSE | 17.62 |
| P04114 | 2336 | AFBAKVHELIEB | FALSE | TRUE | FALSE | 23.32 |
| P04114 | 2337 | FBAKVHELIEBY | FALSE | TRUE | FALSE | 16.39 |
| P04114 | 2338 | BAKVHELIEBYE | FALSE | TRUE | FALSE | 11.54 |
| P04114 | 2439 | TNDKIBEVTQBL | FALSE | TRUE | FALSE | 11.4  |
| P04114 | 2506 | AHMKAKFBETLE | FALSE | TRUE | FALSE | 16.11 |
| P04114 | 2507 | HMKAKFBETLED | FALSE | TRUE | FALSE | 22.35 |
| P04114 | 2508 | MKAKFBETLEDT | FALSE | TRUE | FALSE | 15.83 |
| P04114 | 2509 | KAKFBETLEDTB | FALSE | TRUE | FALSE | 28.72 |
| P04114 | 2510 | AKFBETLEDTBD | FALSE | TRUE | FALSE | 32.79 |
| P04114 | 2511 | KFBETLEDTBDB | FALSE | TRUE | FALSE | 17.38 |
| P04114 | 2512 | FBETLEDTBDBM | FALSE | TRUE | FALSE | 22.89 |
| P04114 | 2571 | QDWAKBMKALVE | FALSE | TRUE | FALSE | 13.06 |
| P04114 | 2572 | DWAKBMKALVEQ | FALSE | TRUE | FALSE | 11.97 |
| P04114 | 2639 | IKIPSBFSTPEF | FALSE | TRUE | FALSE | 14.3  |
| P04114 | 2640 | KIPSBFSTPEFT | FALSE | TRUE | FALSE | 16.08 |
| P04114 | 2641 | IPSBFSTPEFTI | FALSE | TRUE | FALSE | 10.43 |
| P04114 | 2688 | VPDIYLBDLKVE | FALSE | TRUE | FALSE | 11.27 |
| P04114 | 2689 | PDIYLBDLKVED | FALSE | TRUE | FALSE | 10.13 |
| P04114 | 2690 | DIYLBDLKVEDI | FALSE | TRUE | FALSE | 11.98 |
| P04114 | 2691 | IYLBDLKVEDIP | FALSE | TRUE | FALSE | 14.92 |
| P04114 | 2692 | YLBDLKVEDIPL | FALSE | TRUE | FALSE | 10.22 |
| P04114 | 2701 | IPLABITLPDFB | FALSE | TRUE | FALSE | 18.21 |
| P04114 | 2703 | LABITLPDFBLP | FALSE | TRUE | FALSE | 17.94 |
| P04114 | 2704 | ABITLPDFBLPE | FALSE | TRUE | FALSE | 12.77 |
| P04114 | 2832 | SKYLBTEHGSEM | FALSE | TRUE | FALSE | 10.09 |
| P04114 | 3009 | LFGEKAEFTGB  | FALSE | TRUE | FALSE | 13.35 |
| P04114 | 3010 | FGEGKAEFTGBH | FALSE | TRUE | FALSE | 14.16 |
| P04114 | 3011 | GEGKAEFTGBHD | FALSE | TRUE | FALSE | 11.25 |
| P04114 | 3013 | GKAEFTGBHDAH | FALSE | TRUE | FALSE | 15.27 |
| P04114 | 3014 | KAEFTGBHDAHL | FALSE | TRUE | FALSE | 16.7  |
| P04114 | 3016 | EFTGBHDAHLNG | FALSE | TRUE | FALSE | 27.65 |
| P04114 | 3017 | FTGBHDAHLNGK | FALSE | TRUE | FALSE | 23.3  |
| P04114 | 3018 | TGBHDAHLNGKV | FALSE | TRUE | FALSE | 16.86 |
| P04114 | 3019 | GBHDAHLNGKVI | FALSE | TRUE | FALSE | 15.07 |
| P04114 | 3052 | NEGNLKVBFPLB | FALSE | TRUE | FALSE | 10.81 |
| P04114 | 3058 | VBFPLBLTGKID | FALSE | TRUE | FALSE | 27.13 |
| P04114 | 3059 | BFPLBLTGKIDF | FALSE | TRUE | FALSE | 14.75 |
| P04114 | 3081 | SAQQASWQVSAB | FALSE | TRUE | FALSE | 15.78 |

|        |      |                |       |      |       |       |
|--------|------|----------------|-------|------|-------|-------|
| P04114 | 3082 | AQQASWQVSABF   | FALSE | TRUE | FALSE | 11.01 |
| P04114 | 3201 | IKSFDBHFEKNB   | FALSE | TRUE | FALSE | 10.41 |
| P04114 | 3202 | KSFDBHFEKNBN   | FALSE | TRUE | FALSE | 13.2  |
| P04114 | 3203 | SFDBHFEKBNBN   | FALSE | TRUE | FALSE | 22.46 |
| P04114 | 3204 | FDBHFEKBNBNA   | FALSE | TRUE | FALSE | 21.45 |
| P04114 | 3205 | DBHFEKBNBNAL   | FALSE | TRUE | FALSE | 31.52 |
| P04114 | 3206 | BHFEKBNBNALD   | FALSE | TRUE | FALSE | 23.68 |
| P04114 | 3308 | HVPBNLKLSLPD   | FALSE | TRUE | FALSE | 13.67 |
| P04114 | 3377 | LQYKLEGTTLT    | FALSE | TRUE | FALSE | 11.81 |
| P04114 | 3378 | QYKLEGTTLTBT   | FALSE | TRUE | FALSE | 29.22 |
| P04114 | 3379 | YKLEGTTLTBTBK  | FALSE | TRUE | FALSE | 16.03 |
| P04114 | 3380 | KLEGTTLTBTBKB  | FALSE | TRUE | FALSE | 25.8  |
| P04114 | 3381 | LEGTTLTBTBKBG  | FALSE | TRUE | FALSE | 46.68 |
| P04114 | 3382 | EGTTLTBTBKGL   | FALSE | TRUE | FALSE | 47.04 |
| P04114 | 3384 | TTBLTBTBKGLKL  | FALSE | TRUE | FALSE | 13.76 |
| P04114 | 3385 | TBLTBTBKGLKLA  | FALSE | TRUE | FALSE | 13.45 |
| P04114 | 3386 | BLTBTBKGLKLAT  | FALSE | TRUE | FALSE | 12.47 |
| P04114 | 3387 | LBTBKGLKLATA   | FALSE | TRUE | FALSE | 15.1  |
| P04114 | 3388 | TBTBKGLKLATAL  | FALSE | TRUE | FALSE | 14.04 |
| P04114 | 3433 | IPILBMNFKQEL   | FALSE | TRUE | FALSE | 10.27 |
| P04114 | 3435 | ILBMNFKQELNG   | FALSE | TRUE | FALSE | 12.24 |
| P04114 | 3498 | GDVKGSVLSBEY   | FALSE | TRUE | FALSE | 18.16 |
| P04114 | 3499 | DVKGSVLSBEYS   | FALSE | TRUE | FALSE | 20.11 |
| P04114 | 3500 | VKGSVLSBEYSG   | FALSE | TRUE | FALSE | 21.62 |
| P04114 | 3501 | KGSVLSBEYSGT   | FALSE | TRUE | FALSE | 24.64 |
| P04114 | 3502 | GSVLSBEYSGTI   | FALSE | TRUE | FALSE | 16.78 |
| P04114 | 3503 | SVLSBEYSGTIA   | FALSE | TRUE | FALSE | 12.43 |
| P04114 | 3504 | VLSBEYSGTIAS   | FALSE | TRUE | FALSE | 14.53 |
| P04114 | 3505 | LSBEYSGTIASE   | FALSE | TRUE | FALSE | 12.69 |
| P04114 | 3519 | TYLNSKSTBSSV   | FALSE | TRUE | FALSE | 11.33 |
| P04114 | 3632 | BWKNEVBIHSGS   | FALSE | TRUE | FALSE | 13.02 |
| P04114 | 3688 | LKLDVTTSIGBB   | FALSE | TRUE | FALSE | 12.75 |
| P04114 | 3689 | KLDVTTSIGBBQ   | FALSE | TRUE | FALSE | 16.71 |
| P04114 | 3690 | LDVTTSIGBBQH   | FALSE | TRUE | FALSE | 24.11 |
| P04114 | 3691 | DVTTSIGBBQHL   | FALSE | TRUE | FALSE | 28.84 |
| P04114 | 3692 | VTTSIGBBQHLLB  | FALSE | TRUE | FALSE | 32.9  |
| P04114 | 3693 | TTSIGBBQHLLBV  | FALSE | TRUE | FALSE | 24.82 |
| P04114 | 3694 | TSIGBBQHLLBVS  | FALSE | TRUE | FALSE | 37.2  |
| P04114 | 3695 | SIGBBQHLLBVST  | FALSE | TRUE | FALSE | 37.59 |
| P04114 | 3696 | IGBBQHLLBVSTA  | FALSE | TRUE | FALSE | 46.55 |
| P04114 | 3697 | GBBQHLLBVSTAF  | FALSE | TRUE | FALSE | 29.94 |
| P04114 | 3698 | BBQHLLBVSTAFV  | FALSE | TRUE | FALSE | 10.84 |
| P04114 | 3756 | LQVPSCKLDLDFBE | FALSE | TRUE | FALSE | 11.28 |
| P04114 | 3885 | ABFEVDSPVYNA   | FALSE | TRUE | FALSE | 11.57 |
| P04114 | 3945 | TKGTFAHBDLFS   | FALSE | TRUE | FALSE | 13.79 |
| P04114 | 3946 | KGTFHBDLFSAE   | FALSE | TRUE | FALSE | 16.68 |
| P04114 | 3947 | GTFHBDLFSAEY   | FALSE | TRUE | FALSE | 15.72 |
| P04114 | 3948 | TFHBDLFSAEYE   | FALSE | TRUE | FALSE | 12.49 |
| P04114 | 4036 | LTIFKTELVBVE   | FALSE | TRUE | FALSE | 10.76 |
| P04114 | 4037 | TIFKTELVBVES   | FALSE | TRUE | FALSE | 17.48 |
| P04114 | 4038 | IFKTELVBVESD   | FALSE | TRUE | FALSE | 17.33 |
| P04114 | 4039 | FKTELVBVESDE   | FALSE | TRUE | FALSE | 18.01 |

|        |      |              |       |      |       |       |
|--------|------|--------------|-------|------|-------|-------|
| P04114 | 4040 | KTELBVBESDEE | FALSE | TRUE | FALSE | 14.6  |
| P04114 | 4041 | TELBVBESDEET | FALSE | TRUE | FALSE | 16.26 |
| P04114 | 4042 | ELBVBESDEETQ | FALSE | TRUE | FALSE | 15.12 |
| P04114 | 4044 | BVBESDEETQIK | FALSE | TRUE | FALSE | 13    |
| P04114 | 4088 | YHWEHTGLTLBE | FALSE | TRUE | FALSE | 12.4  |
| P04114 | 4091 | EHTGLTLBEVSS | FALSE | TRUE | FALSE | 10.29 |
| P04114 | 4092 | HTGLTLBEVSSK | FALSE | TRUE | FALSE | 17.45 |
| P04114 | 4093 | TGLTLBEVSSKL | FALSE | TRUE | FALSE | 11.94 |
| P04114 | 4094 | GLTLBEVSSKLB | FALSE | TRUE | FALSE | 19.68 |
| P04114 | 4095 | LTLBEVSSKLB  | FALSE | TRUE | FALSE | 23.38 |
| P04114 | 4096 | TLBEVSSKLB   | FALSE | TRUE | FALSE | 37.37 |
| P04114 | 4097 | LBEVSSKLB    | FALSE | TRUE | FALSE | 18.18 |
| P04114 | 4098 | BEVSSKLB     | FALSE | TRUE | FALSE | 28.78 |
| P04114 | 4102 | SKLB         | FALSE | TRUE | FALSE | 23.84 |
| P04114 | 4103 | KLBB         | FALSE | TRUE | FALSE | 19.88 |
| P04114 | 4105 | BBNL         | FALSE | TRUE | FALSE | 14.13 |
| P04114 | 4115 | VYQGAIBQIDDI | FALSE | TRUE | FALSE | 10.06 |
| P04114 | 4116 | YQGAIBQIDDID | FALSE | TRUE | FALSE | 17.71 |
| P04114 | 4119 | AIBQIDDIDVBF | FALSE | TRUE | FALSE | 18.91 |
| P04114 | 4120 | IBQIDDIDVBFQ | FALSE | TRUE | FALSE | 16.44 |
| P04114 | 4121 | BQIDDIDVBFQK | FALSE | TRUE | FALSE | 11.35 |
| P04114 | 4126 | IDVBFQKAASGT | FALSE | TRUE | FALSE | 10.05 |
| P04114 | 4127 | DVBFQKAASGTT | FALSE | TRUE | FALSE | 10.63 |
| P04114 | 4203 | QFPGKPGIYTBE | FALSE | TRUE | FALSE | 44.55 |
| P04114 | 4204 | FPGKPGIYTBEE | FALSE | TRUE | FALSE | 33.89 |
| P04114 | 4205 | PGKPGIYTBEEL | FALSE | TRUE | FALSE | 24.34 |
| P04114 | 4206 | GKPGIYTBEELC | FALSE | TRUE | FALSE | 15.53 |
| P04114 | 4207 | KPGIYTBEELCT | FALSE | TRUE | FALSE | 20.26 |
| P04114 | 4208 | PGIYTBEELCTM | FALSE | TRUE | FALSE | 20.29 |
| P04114 | 4209 | GIYTBEELCTMF | FALSE | TRUE | FALSE | 15.11 |
| P04114 | 4210 | IYTBEELCTMFI | FALSE | TRUE | FALSE | 14.95 |
| P04114 | 4211 | YTBEELCTMFIB | FALSE | TRUE | FALSE | 13.59 |
| P04114 | 4212 | TBEELCTMFIBE | FALSE | TRUE | FALSE | 22.76 |
| P04114 | 4213 | BEELCTMFIBE  | FALSE | TRUE | FALSE | 13.78 |
| P04114 | 4216 | LCTMFIBE     | FALSE | TRUE | FALSE | 10.19 |
| P04114 | 4264 | DVISM        | FALSE | TRUE | FALSE | 10.91 |
| P04114 | 4266 | ISM          | FALSE | TRUE | FALSE | 22.14 |
| P04114 | 4268 | MYBELL       | FALSE | TRUE | FALSE | 11.17 |
| P04114 | 4380 | YIMALBEEYFDP | FALSE | TRUE | FALSE | 13.08 |
| P04114 | 4381 | IMALBEEYFDPS | FALSE | TRUE | FALSE | 15.32 |
| P04114 | 4382 | MALBEEYFDPSI | FALSE | TRUE | FALSE | 11.84 |
| P04114 | 4383 | ALBEEYFDPSIV | FALSE | TRUE | FALSE | 12.17 |
| P04114 | 4384 | LBEEYFDPSIVG | FALSE | TRUE | FALSE | 16.56 |
| P04114 | 4439 | QVEQFLHBNIQE | FALSE | TRUE | FALSE | 16.28 |
| P04114 | 4440 | VEQFLHBNIQEY | FALSE | TRUE | FALSE | 17.02 |
| P04114 | 4441 | EQFLHBNIQEYL | FALSE | TRUE | FALSE | 20.94 |
| P02654 | 43   | TLEDKABELISB | FALSE | TRUE | FALSE | 25.53 |
| P02654 | 44   | LEDKABELISBI | FALSE | TRUE | FALSE | 30.42 |
| P02654 | 45   | EDKABELISBIK | FALSE | TRUE | FALSE | 18.04 |
| P02654 | 46   | DKABELISBIKQ | FALSE | TRUE | FALSE | 29.84 |
| P02654 | 47   | KABELISBIKQS | FALSE | TRUE | FALSE | 12.2  |
| P02654 | 48   | ABELISBIKQSE | FALSE | TRUE | FALSE | 38.32 |

|        |     |               |       |      |       |       |
|--------|-----|---------------|-------|------|-------|-------|
| P02654 | 49  | BELISBIKQSEL  | FALSE | TRUE | FALSE | 29.35 |
| P02654 | 50  | ELISBIKQSELS  | FALSE | TRUE | FALSE | 13.09 |
| P02654 | 51  | LISBIKQSELSA  | FALSE | TRUE | FALSE | 11.7  |
| P02654 | 60  | LSAKMBEWFSET  | FALSE | TRUE | FALSE | 14.32 |
| P02654 | 61  | SAKMBEWFSETF  | FALSE | TRUE | FALSE | 10.89 |
| P02654 | 62  | AKMBEWFSETFQ  | FALSE | TRUE | FALSE | 10.2  |
| P02654 | 63  | KMBEWFSETFQK  | FALSE | TRUE | FALSE | 12.69 |
| P02654 | 64  | MBEWFSETFQKV  | FALSE | TRUE | FALSE | 10.53 |
| P02656 | 53  | SQVAQQABGWVT  | FALSE | TRUE | FALSE | 14.79 |
| P02656 | 54  | QVAQQABGWVTD  | FALSE | TRUE | FALSE | 15.74 |
| P02656 | 55  | VAQQABGWVTDG  | FALSE | TRUE | FALSE | 27.73 |
| P02656 | 56  | AQQABGWVTDGF  | FALSE | TRUE | FALSE | 20.63 |
| P02656 | 57  | QQABGWVTDGFS  | FALSE | TRUE | FALSE | 21.51 |
| P02656 | 58  | QABGWVTDGFSS  | FALSE | TRUE | FALSE | 24.16 |
| P02656 | 59  | ABGWVTDGFSSL  | FALSE | TRUE | FALSE | 10.5  |
| P02649 | 31  | ELBQQTEWQSGQ  | FALSE | TRUE | FALSE | 13.82 |
| P02649 | 32  | LBQQTEWQSGQB  | FALSE | TRUE | FALSE | 25.55 |
| P02649 | 33  | BQQTEWQSGQBV  | FALSE | TRUE | FALSE | 13.76 |
| P02649 | 39  | QSGQBWELALGB  | FALSE | TRUE | FALSE | 19.6  |
| P02649 | 40  | SGQBWELALGBF  | FALSE | TRUE | FALSE | 11.37 |
| P02649 | 100 | LTPVAEETBABL  | FALSE | TRUE | FALSE | 12.1  |
| P02649 | 101 | TPVAEETBABLS  | FALSE | TRUE | FALSE | 11.38 |
| P02649 | 102 | PVAEETBABL SK | FALSE | TRUE | FALSE | 23.63 |
| P02649 | 103 | VAEETBABL SKE | FALSE | TRUE | FALSE | 19.71 |
| P02649 | 104 | AEETBABL SKEL | FALSE | TRUE | FALSE | 15.17 |
| P02649 | 105 | EETBABL SKELQ | FALSE | TRUE | FALSE | 23.17 |
| P02649 | 107 | TBABL SKELQAA | FALSE | TRUE | FALSE | 22.62 |
| P02649 | 108 | BABL SKELQAAQ | FALSE | TRUE | FALSE | 13.49 |
| P02649 | 118 | AQABLGADMEDV  | FALSE | TRUE | FALSE | 11.37 |
| P02649 | 119 | QABLGADMEDVC  | FALSE | TRUE | FALSE | 13.59 |
| P02649 | 120 | ABLGADMEDVCG  | FALSE | TRUE | FALSE | 10.38 |
| P02649 | 127 | EDVCGBLVQYBG  | FALSE | TRUE | FALSE | 10.76 |
| P02649 | 128 | DVCGBLVQYBGE  | FALSE | TRUE | FALSE | 12.26 |
| P02649 | 129 | VCGBLVQYBGEV  | FALSE | TRUE | FALSE | 27.05 |
| P02649 | 130 | CGBLVQYBGEVQ  | FALSE | TRUE | FALSE | 35.61 |
| P02649 | 132 | BLVQYBGEVQAM  | FALSE | TRUE | FALSE | 31.85 |
| P02649 | 133 | LVQYBGEVQAML  | FALSE | TRUE | FALSE | 26.71 |
| P02649 | 134 | VQYBGEVQAMLG  | FALSE | TRUE | FALSE | 30.07 |
| P02649 | 135 | QYBGEVQAMLGQ  | FALSE | TRUE | FALSE | 30.83 |
| P02649 | 136 | YBGEVQAMLGQS  | FALSE | TRUE | FALSE | 22.39 |
| P02649 | 137 | BGEVQAMLGQST  | FALSE | TRUE | FALSE | 13.08 |
| P02649 | 158 | HLBKLBKLLBD   | FALSE | TRUE | FALSE | 11.4  |
| P02649 | 160 | BKLBKLLBDAD   | FALSE | TRUE | FALSE | 11.42 |
| P02649 | 161 | KLBKLLBDADD   | FALSE | TRUE | FALSE | 17.48 |
| P02649 | 162 | LBKLLBDADDL   | FALSE | TRUE | FALSE | 18.26 |
| P02649 | 163 | BKLLBDADDLQ   | FALSE | TRUE | FALSE | 12.18 |
| P02649 | 164 | KLLBDADDLQK   | FALSE | TRUE | FALSE | 16.2  |
| P02649 | 165 | BLLBDADDLQKB  | FALSE | TRUE | FALSE | 16.38 |
| P02649 | 166 | LLBDADDLQKBL  | FALSE | TRUE | FALSE | 10.04 |
| P02649 | 175 | KBLAVYQAGABE  | FALSE | TRUE | FALSE | 18.86 |
| P02649 | 176 | BLAVYQAGABEG  | FALSE | TRUE | FALSE | 12.81 |
| P02649 | 179 | VYQAGABEGAEB  | FALSE | TRUE | FALSE | 15.23 |

|        |     |              |       |      |       |       |
|--------|-----|--------------|-------|------|-------|-------|
| P02649 | 180 | YQAGABEGAEBG | FALSE | TRUE | FALSE | 20.14 |
| P02649 | 181 | QAGABEGAEBGL | FALSE | TRUE | FALSE | 24.44 |
| P02649 | 182 | AGABEGAEBGLS | FALSE | TRUE | FALSE | 32.27 |
| P02649 | 183 | GABEGAEBGLSA | FALSE | TRUE | FALSE | 34.48 |
| P02649 | 184 | ABEGAEBGLSAI | FALSE | TRUE | FALSE | 23.74 |
| P02649 | 185 | BEGAEBGLSAIB | FALSE | TRUE | FALSE | 17.49 |
| P02649 | 186 | EGAEBGLSAIBE | FALSE | TRUE | FALSE | 17.22 |
| P02649 | 187 | GAEBGLSAIBEB | FALSE | TRUE | FALSE | 29.76 |
| P02649 | 188 | AEBGLSAIBEBL | FALSE | TRUE | FALSE | 30.19 |
| P02649 | 189 | EBGLSAIBEBLG | FALSE | TRUE | FALSE | 35.18 |
| P02649 | 190 | BGLSAIBEBLGP | FALSE | TRUE | FALSE | 43.59 |
| P02649 | 191 | GLSAIBEBLGPL | FALSE | TRUE | FALSE | 16.31 |
| P02649 | 192 | LSAIBEBLGPLV | FALSE | TRUE | FALSE | 24.02 |
| P02649 | 193 | SAIBEBLGPLVE | FALSE | TRUE | FALSE | 26.35 |
| P02649 | 194 | AIBEBLGPLVEQ | FALSE | TRUE | FALSE | 30    |
| P02649 | 195 | IBEBLGPLVEQG | FALSE | TRUE | FALSE | 20.38 |
| P02649 | 196 | BEBLGPLVEQGB | FALSE | TRUE | FALSE | 19.56 |
| P02649 | 203 | VEQGBVBAATVG | FALSE | TRUE | FALSE | 11.7  |
| P02649 | 204 | EQGBVBAATVGS | FALSE | TRUE | FALSE | 15.57 |
| P02649 | 205 | QGBVBAATVGS  | FALSE | TRUE | FALSE | 23.57 |
| P02649 | 206 | GBVBAATVGS   | FALSE | TRUE | FALSE | 20.64 |
| P02649 | 207 | BVBAATVGS    | FALSE | TRUE | FALSE | 15.67 |
| P02649 | 226 | QAWGEBLBABME | FALSE | TRUE | FALSE | 10.39 |
| P02649 | 231 | BLBABMEEMGSB | FALSE | TRUE | FALSE | 13.91 |
| P02649 | 232 | LBABMEEMGSBT | FALSE | TRUE | FALSE | 14.36 |
| P02649 | 233 | BABMEEMGSBTB | FALSE | TRUE | FALSE | 18.77 |
| P02649 | 235 | BMEEMGSBTBDB | FALSE | TRUE | FALSE | 12.91 |
| P02649 | 236 | MEEMGSBTBDBL | FALSE | TRUE | FALSE | 12.21 |
| P02649 | 237 | EEMGSBTBDBLD | FALSE | TRUE | FALSE | 13.6  |
| P02649 | 238 | EMGSBTBDBLDE | FALSE | TRUE | FALSE | 20.05 |
| P02649 | 239 | MGSBTBDBLDEV | FALSE | TRUE | FALSE | 22.84 |
| P02649 | 240 | GSBTBDBLDEVK | FALSE | TRUE | FALSE | 34.01 |
| P02649 | 241 | SBTBDBLDEVKE | FALSE | TRUE | FALSE | 35.66 |
| P02649 | 242 | BTBDBLDEVKEQ | FALSE | TRUE | FALSE | 25.8  |
| P02649 | 243 | TBDBLDEVKEQV | FALSE | TRUE | FALSE | 11.93 |
| P02649 | 267 | QIBLQAEAFQAB | FALSE | TRUE | FALSE | 22.89 |
| P02649 | 268 | IBLQAEAFQABL | FALSE | TRUE | FALSE | 12.57 |
| P02649 | 269 | BLQAEAFQABLK | FALSE | TRUE | FALSE | 17.05 |
| P02649 | 270 | LQAEAFQABLKS | FALSE | TRUE | FALSE | 11.33 |
| P02649 | 271 | QAEAFQABLKSW | FALSE | TRUE | FALSE | 10.6  |
| P02649 | 289 | DMQBQWAGLVEK | FALSE | TRUE | FALSE | 12.1  |
| P02649 | 290 | MQBQWAGLVEKV | FALSE | TRUE | FALSE | 24.95 |
| P02649 | 291 | QBQWAGLVEKVQ | FALSE | TRUE | FALSE | 29.89 |
| P02749 | 47  | ITYSCKPGYVSB | FALSE | TRUE | FALSE | 15.64 |
| P02749 | 48  | TYSCKPGYVSBG | FALSE | TRUE | FALSE | 41.23 |
| P02749 | 49  | YSCKPGYVSBGG | FALSE | TRUE | FALSE | 22.89 |
| P02749 | 50  | SCKPGYVSBGGM | FALSE | TRUE | FALSE | 41.33 |
| P02749 | 51  | CKPGYVSBGGMB | FALSE | TRUE | FALSE | 13.93 |
| P02749 | 52  | KPGYVSBGGMBK | FALSE | TRUE | FALSE | 23.05 |
| P02749 | 53  | PGYVSBGGMBKF | FALSE | TRUE | FALSE | 27.68 |
| P02749 | 54  | GYVSBGGMBKFI | FALSE | TRUE | FALSE | 34.76 |
| P02749 | 55  | YVSBGGMBKFI  | FALSE | TRUE | FALSE | 29.93 |



|        |     |               |       |      |       |       |
|--------|-----|---------------|-------|------|-------|-------|
| P02749 | 56  | VSBGGMBKFICP  | FALSE | TRUE | FALSE | 30.96 |
| P02749 | 57  | SBGGMBKFICPL  | FALSE | TRUE | FALSE | 23.73 |
| P02749 | 58  | BGGMBKFICPLT  | FALSE | TRUE | FALSE | 15.58 |
| P02749 | 94  | AVBYTTFEYPNT  | FALSE | TRUE | FALSE | 16.72 |
| P02749 | 160 | AGNNSLYBDTAV  | FALSE | TRUE | FALSE | 10.08 |
| P02749 | 199 | ECBEVKCPFPSB  | FALSE | TRUE | FALSE | 18.72 |
| P02749 | 200 | CBEVKCPFPSBP  | FALSE | TRUE | FALSE | 10.98 |
| P60709 | 26  | APBAVFPSIVGB  | FALSE | TRUE | FALSE | 11.16 |
| P60709 | 33  | SIVGBPBHQGVM  | FALSE | TRUE | FALSE | 10.74 |
| P60709 | 36  | GBPBHQGVMVGM  | FALSE | TRUE | FALSE | 12.75 |
| P60709 | 37  | BPBHQGVMVGMG  | FALSE | TRUE | FALSE | 10.78 |
| P60709 | 38  | PBHQGVMVGMGC  | FALSE | TRUE | FALSE | 11.72 |
| P60709 | 54  | VGDEAQSKBGIL  | FALSE | TRUE | FALSE | 10.46 |
| P60709 | 55  | GDEAQSKBGILT  | FALSE | TRUE | FALSE | 12.45 |
| P60709 | 91  | YNELBVAPEEHP  | FALSE | TRUE | FALSE | 10.06 |
| P60709 | 139 | VLSLYASGBTTG  | FALSE | TRUE | FALSE | 10.33 |
| P60709 | 140 | LSLYASGBTTGI  | FALSE | TRUE | FALSE | 11.99 |
| P60709 | 141 | SLYASGBTTGIV  | FALSE | TRUE | FALSE | 12.96 |
| P60709 | 142 | LYASGBTTGIVM  | FALSE | TRUE | FALSE | 16.43 |
| P60709 | 143 | YASGBTTGIVMD  | FALSE | TRUE | FALSE | 14.12 |
| P60709 | 145 | SGBTTGIVMDSG  | FALSE | TRUE | FALSE | 10.27 |
| P60709 | 175 | ILBLDLAGBDLT  | FALSE | TRUE | FALSE | 12.1  |
| P60709 | 176 | LBLDLAGBDLTD  | FALSE | TRUE | FALSE | 11.94 |
| P60709 | 177 | BLDLAGBDLTDY  | FALSE | TRUE | FALSE | 11.1  |
| P60709 | 196 | BGYSFTTTAEBE  | FALSE | TRUE | FALSE | 15.72 |
| P60709 | 201 | TTTAEBEIVBDI  | FALSE | TRUE | FALSE | 12.88 |
| P60709 | 202 | TTAEBEIVBDIK  | FALSE | TRUE | FALSE | 17.09 |
| P60709 | 203 | TAEBEIVBDIKE  | FALSE | TRUE | FALSE | 12.14 |
| P60709 | 204 | AEBEIVBDIKEK  | FALSE | TRUE | FALSE | 10.6  |
| P60709 | 205 | EBEIVBDIKEKL  | FALSE | TRUE | FALSE | 11.3  |
| P60709 | 251 | GNEBFBCPEALF  | FALSE | TRUE | FALSE | 11.3  |
| P60709 | 254 | BFBCPEALFQPS  | FALSE | TRUE | FALSE | 10.84 |
| P60709 | 304 | TMYPGIADBMQK  | FALSE | TRUE | FALSE | 10.24 |
| P60709 | 306 | YPGIADBMQKEI  | FALSE | TRUE | FALSE | 10.16 |
| P60709 | 362 | YDESGPSIVHBK  | FALSE | TRUE | FALSE | 12.82 |
| P04003 | 65  | TLTETBFKTGTT  | FALSE | TRUE | FALSE | 10.38 |
| P04003 | 109 | IYKBCBHPGELB  | FALSE | TRUE | FALSE | 17.87 |
| P04003 | 110 | YKBCBHPGELBN  | FALSE | TRUE | FALSE | 25.27 |
| P04003 | 111 | KBCBHPGELBNG  | FALSE | TRUE | FALSE | 20.95 |
| P04003 | 112 | BCBHPGELBNGQ  | FALSE | TRUE | FALSE | 13.6  |
| P04003 | 113 | CBHPGELBNGQV  | FALSE | TRUE | FALSE | 10.75 |
| P04003 | 114 | BHPGELBNGQVE  | FALSE | TRUE | FALSE | 10.15 |
| P04003 | 150 | TTSBCEVQDBGV  | FALSE | TRUE | FALSE | 10.78 |
| P04003 | 151 | TSBCEVQDBGVG  | FALSE | TRUE | FALSE | 11.32 |
| P04003 | 152 | SBCEVQDBGVGW  | FALSE | TRUE | FALSE | 14.85 |
| P04003 | 153 | BCEVQDBGVGWS  | FALSE | TRUE | FALSE | 11.97 |
| P04003 | 156 | VQDBGVGWWSHPL | FALSE | TRUE | FALSE | 10.47 |
| P04003 | 157 | QDBGVGWWSHPLP | FALSE | TRUE | FALSE | 10.06 |
| P04003 | 158 | DBGVGWWSHPLPQ | FALSE | TRUE | FALSE | 11.44 |
| P04003 | 175 | CKPPPDIBNGBH  | FALSE | TRUE | FALSE | 18.98 |
| P04003 | 176 | KPPPDIBNGBHS  | FALSE | TRUE | FALSE | 24.29 |
| P04003 | 177 | PPPDIBNGBHSG  | FALSE | TRUE | FALSE | 10.41 |

|        |     |              |       |      |       |       |
|--------|-----|--------------|-------|------|-------|-------|
| P04003 | 178 | PPDIBNGBHSGE | FALSE | TRUE | FALSE | 12.9  |
| P04003 | 179 | PDIBNGBHSGEE | FALSE | TRUE | FALSE | 17.37 |
| P04003 | 180 | DIBNGBHSGEEN | FALSE | TRUE | FALSE | 29.71 |
| P04003 | 181 | IBNGBHSGEENF | FALSE | TRUE | FALSE | 37.52 |
| P04003 | 182 | BNGBHSGEENFY | FALSE | TRUE | FALSE | 16.16 |
| P04003 | 184 | GBHSGEENFYAY | FALSE | TRUE | FALSE | 10.35 |
| P04003 | 266 | KCQKGFVLBGSS | FALSE | TRUE | FALSE | 12.42 |
| P04003 | 267 | CQKGFVLBGSSV | FALSE | TRUE | FALSE | 29.8  |
| P04003 | 268 | QKGFVLBGSSVI | FALSE | TRUE | FALSE | 20.13 |
| P04003 | 269 | KGFVLBGSSVIH | FALSE | TRUE | FALSE | 10.48 |
| P04003 | 271 | FVLBGSSVIHCD | FALSE | TRUE | FALSE | 13.78 |
| P04003 | 272 | VLBGSSVIHCDA | FALSE | TRUE | FALSE | 12.1  |
| P04003 | 273 | LBGSSVIHCDA  | FALSE | TRUE | FALSE | 14.09 |
| P04003 | 371 | NNGEITQHBKSB | FALSE | TRUE | FALSE | 21.65 |
| P04003 | 401 | ETSBFSAICQGD | FALSE | TRUE | FALSE | 10.91 |
| P04003 | 402 | TSBFSAICQGDG | FALSE | TRUE | FALSE | 11.12 |
| P04003 | 403 | SBFSAICQGDGT | FALSE | TRUE | FALSE | 11.48 |
| P04003 | 408 | ICQGDGTWSPBT | FALSE | TRUE | FALSE | 13.98 |
| P04003 | 409 | CQGDGTWSPBTP | FALSE | TRUE | FALSE | 10.61 |
| P04003 | 410 | QGDGTWSPBTPS | FALSE | TRUE | FALSE | 11.12 |
| P04003 | 491 | NGBLSVDKDQYV | FALSE | TRUE | FALSE | 10.04 |
| P04003 | 579 | EQLELQBDSABQ | FALSE | TRUE | FALSE | 11.06 |
| P04003 | 580 | QLELQBDSABQS | FALSE | TRUE | FALSE | 19.11 |
| P04003 | 581 | LELQBDSABQST | FALSE | TRUE | FALSE | 19.71 |
| P04003 | 582 | ELQBDSABQSTL | FALSE | TRUE | FALSE | 31.62 |
| P04003 | 583 | LQBDSABQSTLD | FALSE | TRUE | FALSE | 45.31 |
| P04003 | 584 | QBDSABQSTLTK | FALSE | TRUE | FALSE | 55.5  |
| P04003 | 585 | BDSABQSTLDKE | FALSE | TRUE | FALSE | 42.18 |
| P04003 | 586 | DSABQSTLDKEL | FALSE | TRUE | FALSE | 37.72 |
| P20851 | 131 | FPICKSBDCDPP | FALSE | TRUE | FALSE | 12.12 |
| P20851 | 133 | ICKSBDCDPPGN | FALSE | TRUE | FALSE | 15.64 |
| P20851 | 134 | CKSBDCDPPGNP | FALSE | TRUE | FALSE | 15.08 |
| P16070 | 35  | HVEKNGBYSISB | FALSE | TRUE | FALSE | 24.8  |
| P16070 | 36  | VEKNGBYSISBT | FALSE | TRUE | FALSE | 35.2  |
| P16070 | 37  | EKNGBYSISBTE | FALSE | TRUE | FALSE | 28.83 |
| P16070 | 38  | KNGBYSISBTEA | FALSE | TRUE | FALSE | 17.2  |
| P16070 | 40  | GBYSISBTEAAD | FALSE | TRUE | FALSE | 19.57 |
| P16070 | 41  | BYSISBTEAADL | FALSE | TRUE | FALSE | 17.94 |
| P16070 | 144 | TITIVNBDGTBY | FALSE | TRUE | FALSE | 19.44 |
| P16070 | 145 | ITIVNBDGTBYV | FALSE | TRUE | FALSE | 18    |
| P16070 | 146 | TIVNBDGTBYVQ | FALSE | TRUE | FALSE | 18.91 |
| P16070 | 147 | IVNBDGTBYVQK | FALSE | TRUE | FALSE | 30.26 |
| P16070 | 148 | VNBDGTBYVQKG | FALSE | TRUE | FALSE | 27.76 |
| P16070 | 149 | NBDGTBYVQKGE | FALSE | TRUE | FALSE | 27.15 |
| P16070 | 150 | BDGTBYVQKGEY | FALSE | TRUE | FALSE | 35.27 |
| P16070 | 151 | DGTBYVQKGEYB | FALSE | TRUE | FALSE | 22.23 |
| P16070 | 152 | GTBYVQKGEYBT | FALSE | TRUE | FALSE | 20.12 |
| P16070 | 153 | TBYVQKGEYBTN | FALSE | TRUE | FALSE | 19.08 |
| P16070 | 154 | BYVQKGEYBTNP | FALSE | TRUE | FALSE | 24.12 |
| P16070 | 228 | SATATETATKBQ | FALSE | TRUE | FALSE | 11.43 |
| P16070 | 231 | ATETATKBQETW | FALSE | TRUE | FALSE | 11.27 |
| P16070 | 232 | TETATKBQETWD | FALSE | TRUE | FALSE | 10.72 |

|        |     |               |       |      |       |       |
|--------|-----|---------------|-------|------|-------|-------|
| P16070 | 235 | ATKBQETWDWFS  | FALSE | TRUE | FALSE | 12.25 |
| P16070 | 336 | VLLQTTTBMTDV  | FALSE | TRUE | FALSE | 13.9  |
| P16070 | 339 | QTTTBMTDVDBN  | FALSE | TRUE | FALSE | 12.91 |
| P16070 | 340 | TTTBMTDVDBNG  | FALSE | TRUE | FALSE | 12.38 |
| P16070 | 341 | TTBMTDVDBNGT  | FALSE | TRUE | FALSE | 16.04 |
| P16070 | 342 | TBMTDVDBNGTT  | FALSE | TRUE | FALSE | 16.02 |
| P16070 | 396 | TATQKEQWFGNB  | FALSE | TRUE | FALSE | 10.08 |
| P16070 | 403 | WFGNBWHEGYBQ  | FALSE | TRUE | FALSE | 15.69 |
| P16070 | 404 | FGNBWHEGYBQT  | FALSE | TRUE | FALSE | 26.16 |
| P16070 | 405 | GNBWHEGYBQTP  | FALSE | TRUE | FALSE | 28.2  |
| P16070 | 406 | NBWHEGYBQTPK  | FALSE | TRUE | FALSE | 21.04 |
| P16070 | 407 | BWHEGYBQTPKE  | FALSE | TRUE | FALSE | 48.43 |
| P16070 | 408 | WHEGYBQTPKED  | FALSE | TRUE | FALSE | 10.81 |
| P16070 | 409 | HEGYBQTPKEDS  | FALSE | TRUE | FALSE | 28.99 |
| P16070 | 410 | EGYBQTPKEDSH  | FALSE | TRUE | FALSE | 28.41 |
| P16070 | 411 | GYBQTPKEDSHS  | FALSE | TRUE | FALSE | 40.45 |
| P16070 | 412 | YBQTPKEDSHST  | FALSE | TRUE | FALSE | 35.01 |
| P16070 | 434 | SHPMQGBTTPSP  | FALSE | TRUE | FALSE | 10.04 |
| P16070 | 452 | DFFNPISHPMGB  | FALSE | TRUE | FALSE | 12    |
| P16070 | 453 | FFNPISHPMGBG  | FALSE | TRUE | FALSE | 10.18 |
| P16070 | 454 | FNPIHPMGBGH   | FALSE | TRUE | FALSE | 12.99 |
| P16070 | 455 | NPISHPMGBGHQ  | FALSE | TRUE | FALSE | 15.42 |
| P16070 | 457 | ISHPMGBGHQAG  | FALSE | TRUE | FALSE | 18.47 |
| P16070 | 458 | SHPMGBGHQAGB  | FALSE | TRUE | FALSE | 24.89 |
| P16070 | 459 | HPMGBGHQAGBB  | FALSE | TRUE | FALSE | 13.75 |
| P16070 | 461 | MGBGHQAGBBMC  | FALSE | TRUE | FALSE | 15.77 |
| P16070 | 462 | GBGHQAGBBMDM  | FALSE | TRUE | FALSE | 10.81 |
| P16070 | 463 | BGHQAGBBMDMD  | FALSE | TRUE | FALSE | 11.35 |
| P16070 | 467 | AGBBMDMDSSHS  | FALSE | TRUE | FALSE | 11.04 |
| P16070 | 495 | LDBTGPLSMTTQ  | FALSE | TRUE | FALSE | 10.13 |
| P16070 | 533 | TSSNBNDVTGGB  | FALSE | TRUE | FALSE | 12.07 |
| P16070 | 536 | NBNDVTGGBBDP  | FALSE | TRUE | FALSE | 17.62 |
| P16070 | 537 | BNDVTGGBBDPN  | FALSE | TRUE | FALSE | 14.4  |
| P16070 | 538 | NDVTGGBBDPNH  | FALSE | TRUE | FALSE | 13.45 |
| P16070 | 539 | DVTGGBBDPNHS  | FALSE | TRUE | FALSE | 11.06 |
| P16070 | 540 | VTGGBBDPNHSE  | FALSE | TRUE | FALSE | 17.35 |
| P16070 | 541 | TGGBBDPNHSEG  | FALSE | TRUE | FALSE | 16.49 |
| P16070 | 542 | GGBBDPNHSEGS  | FALSE | TRUE | FALSE | 16.82 |
| P16070 | 543 | GBBDPNHSEGST  | FALSE | TRUE | FALSE | 16.37 |
| P16070 | 544 | BBDPNHSEGSTT  | FALSE | TRUE | FALSE | 10.15 |
| P16070 | 560 | YTSHYPHTKESB  | FALSE | TRUE | FALSE | 11.92 |
| P16070 | 568 | KESBTFIPV TSA | FALSE | TRUE | FALSE | 11.11 |
| P16070 | 666 | VCIAVNSBBBCG  | FALSE | TRUE | FALSE | 13.47 |
| P16070 | 667 | CIAVNSBBBCGQ  | FALSE | TRUE | FALSE | 15.28 |
| P16070 | 668 | IAVNSBBBCGQK  | FALSE | TRUE | FALSE | 12.05 |
| P16070 | 729 | ETBNLQNVDMKI  | FALSE | TRUE | FALSE | 16.91 |
| P16070 | 730 | TBNLQNVDMKIG  | FALSE | TRUE | FALSE | 16.17 |
| P00450 | 55  | YLQNGPDBIGBL  | FALSE | TRUE | FALSE | 12.28 |
| P00450 | 56  | LQNGPDBIGBLY  | FALSE | TRUE | FALSE | 11.19 |
| P00450 | 57  | QNGPDBIGBLYK  | FALSE | TRUE | FALSE | 11.57 |
| P00450 | 72  | YLQYTDETFBTT  | FALSE | TRUE | FALSE | 11.78 |
| P00450 | 73  | LQYTDETFBT TI | FALSE | TRUE | FALSE | 13.79 |

|        |     |              |       |      |       |       |
|--------|-----|--------------|-------|------|-------|-------|
| P00450 | 74  | QYTFBTTIE    | FALSE | TRUE | FALSE | 11    |
| P00450 | 75  | YTFBTTIEK    | FALSE | TRUE | FALSE | 15.27 |
| P00450 | 76  | TDFBTTIEKP   | FALSE | TRUE | FALSE | 15.8  |
| P00450 | 77  | DFBTTIEKPV   | FALSE | TRUE | FALSE | 17.96 |
| P00450 | 78  | TFBTTIEKPVW  | FALSE | TRUE | FALSE | 13.98 |
| P00450 | 79  | FBTTIEKPVWL  | FALSE | TRUE | FALSE | 11.99 |
| P00450 | 80  | FBTTIEKPVWLG | FALSE | TRUE | FALSE | 10.23 |
| P00450 | 139 | TTDFQBADDKVY | FALSE | TRUE | FALSE | 10    |
| P00450 | 364 | DNIBGKHVBHYY | FALSE | TRUE | FALSE | 12.25 |
| P00450 | 407 | VFFEQGTTBIGG | FALSE | TRUE | FALSE | 10.99 |
| P00450 | 408 | FFEQGTTBIGGS | FALSE | TRUE | FALSE | 15.97 |
| P00450 | 409 | FEQGTTBIGGSY | FALSE | TRUE | FALSE | 15.18 |
| P00450 | 410 | EQGTTBIGGSYK | FALSE | TRUE | FALSE | 13.89 |
| P00450 | 416 | IGGSYKLVYBE  | FALSE | TRUE | FALSE | 12    |
| P00450 | 421 | KKLVYBEYTDAS | FALSE | TRUE | FALSE | 14.27 |
| P00450 | 423 | LVYBEYTDASFT | FALSE | TRUE | FALSE | 11.42 |
| P00450 | 424 | VYBEYTDASFTN | FALSE | TRUE | FALSE | 10.12 |
| P00450 | 425 | YBEYTDASFTNB | FALSE | TRUE | FALSE | 25.15 |
| P00450 | 426 | BEYTDASFTNBK | FALSE | TRUE | FALSE | 33.86 |
| P00450 | 428 | YTDASFTNBKEB | FALSE | TRUE | FALSE | 17.2  |
| P00450 | 429 | TDASFTNBKEBG | FALSE | TRUE | FALSE | 22.28 |
| P00450 | 430 | DASFTNBKEBGP | FALSE | TRUE | FALSE | 25.32 |
| P00450 | 431 | ASFTNBKEBGPE | FALSE | TRUE | FALSE | 23.08 |
| P00450 | 432 | SFTNBKEBGPEE | FALSE | TRUE | FALSE | 34.23 |
| P00450 | 433 | FTNBKEBGPEEE | FALSE | TRUE | FALSE | 27.16 |
| P00450 | 434 | TNBKEBGPEEEH | FALSE | TRUE | FALSE | 17.81 |
| P00450 | 435 | NBKEBGPEEEHL | FALSE | TRUE | FALSE | 13.37 |
| P00450 | 436 | BKEBGPEEEHLG | FALSE | TRUE | FALSE | 11.85 |
| P00450 | 489 | TYSPNYNPQSB  | FALSE | TRUE | FALSE | 15.58 |
| P00450 | 490 | YSPNYNPQSBS  | FALSE | TRUE | FALSE | 15.18 |
| P00450 | 495 | YNPQSBSVPPSA | FALSE | TRUE | FALSE | 15.57 |
| P00450 | 566 | HANGBQKDVDKE | FALSE | TRUE | FALSE | 14.22 |
| P00450 | 567 | ANGBQKDVDKEF | FALSE | TRUE | FALSE | 12.66 |
| P00450 | 569 | GBQKDVDKEFYL | FALSE | TRUE | FALSE | 14.38 |
| P00450 | 659 | YFSGNTYLWBGE | FALSE | TRUE | FALSE | 11.41 |
| P00450 | 660 | FSGNTYLWBGEB | FALSE | TRUE | FALSE | 24.24 |
| P00450 | 661 | SGNTYLWBGEBB | FALSE | TRUE | FALSE | 24.23 |
| P00450 | 662 | GNTYLWBGEBBD | FALSE | TRUE | FALSE | 28.92 |
| P00450 | 663 | NTYLWBGEBBDT | FALSE | TRUE | FALSE | 37.79 |
| P00450 | 664 | TYLWBGEBBDTA | FALSE | TRUE | FALSE | 31.95 |
| P00450 | 665 | YLWBGEBBDTAN | FALSE | TRUE | FALSE | 42.28 |
| P00450 | 666 | LWBGEBBDTANL | FALSE | TRUE | FALSE | 42.98 |
| P00450 | 667 | WBGEBBDTANLF | FALSE | TRUE | FALSE | 33.65 |
| P00450 | 668 | BGEBBDTANLFP | FALSE | TRUE | FALSE | 46.31 |
| P00450 | 669 | GEBBDTANLFPQ | FALSE | TRUE | FALSE | 15.52 |
| P00450 | 670 | EBBDTANLFPQT | FALSE | TRUE | FALSE | 14.12 |
| P00450 | 671 | BBDTANLFPQTS | FALSE | TRUE | FALSE | 16.34 |
| P00450 | 711 | QKYTVNQCBBQS | FALSE | TRUE | FALSE | 12.48 |
| P00450 | 715 | VNQCBBQSEDST | FALSE | TRUE | FALSE | 12.64 |
| P00450 | 716 | NQCBBQSEDSTF | FALSE | TRUE | FALSE | 18.41 |
| P00450 | 717 | QCBBQSEDSTFY | FALSE | TRUE | FALSE | 14.36 |
| P00450 | 718 | CBBQSEDSTFYL | FALSE | TRUE | FALSE | 37.94 |

|        |      |               |       |      |       |       |
|--------|------|---------------|-------|------|-------|-------|
| P00450 | 719  | BBQSEDSTFYLG  | FALSE | TRUE | FALSE | 35.23 |
| P00450 | 745  | YSPQBEWEKELH  | FALSE | TRUE | FALSE | 10.53 |
| P00450 | 748  | QBEWEKELHHLQ  | FALSE | TRUE | FALSE | 17.82 |
| P00450 | 782  | VVYBQYTDSTFB  | FALSE | TRUE | FALSE | 16.4  |
| P00450 | 783  | VYBQYTDSTFBV  | FALSE | TRUE | FALSE | 10.51 |
| P00450 | 900  | CBBPYLKVFNPB  | FALSE | TRUE | FALSE | 10.55 |
| P00450 | 904  | YLVFNPBBKLE   | FALSE | TRUE | FALSE | 11.89 |
| P00450 | 905  | LKVFNPPBBKLEF | FALSE | TRUE | FALSE | 12.53 |
| P00450 | 906  | KVFNPBBKLEFA  | FALSE | TRUE | FALSE | 11.26 |
| P00450 | 907  | VFNPPBBKLEFAL | FALSE | TRUE | FALSE | 15.15 |
| P00450 | 963  | GBMFGNLQGLTM  | FALSE | TRUE | FALSE | 12.37 |
| P00450 | 1003 | FQYKHBGVYSSD  | FALSE | TRUE | FALSE | 30.59 |
| P00450 | 1004 | QYKHBGVYSSDV  | FALSE | TRUE | FALSE | 34.72 |
| P00450 | 1005 | YKHBGVYSSDVF  | FALSE | TRUE | FALSE | 11.36 |
| O43633 | 1    | MDLLFGBBKTPE  | FALSE | TRUE | FALSE | 30.82 |
| O43633 | 2    | DLLFGBBKTPEE  | FALSE | TRUE | FALSE | 33.6  |
| O43633 | 3    | LLFGBBKTPEEL  | FALSE | TRUE | FALSE | 36.9  |
| O43633 | 4    | LFGBBKTPEELL  | FALSE | TRUE | FALSE | 35.59 |
| O43633 | 5    | FGBBKTPEELLB  | FALSE | TRUE | FALSE | 23.66 |
| O43633 | 6    | GBBKTPEELLBQ  | FALSE | TRUE | FALSE | 21.89 |
| O43633 | 7    | BBKTPEELLBQN  | FALSE | TRUE | FALSE | 14.11 |
| O43633 | 8    | BKTPEELLBQNN  | FALSE | TRUE | FALSE | 10.53 |
| O43633 | 13   | ELLBQNBALNB   | FALSE | TRUE | FALSE | 19.6  |
| O43633 | 14   | LLBQNBALNBA   | FALSE | TRUE | FALSE | 23.92 |
| O43633 | 15   | LBQNBALNBAM   | FALSE | TRUE | FALSE | 17.04 |
| O43633 | 16   | BQNBALNBAMB   | FALSE | TRUE | FALSE | 15.56 |
| O43633 | 17   | QNBALNBAMBE   | FALSE | TRUE | FALSE | 11.13 |
| O43633 | 19   | QBALNBAMBELD  | FALSE | TRUE | FALSE | 15.79 |
| O43633 | 20   | BALNBAMBELDB  | FALSE | TRUE | FALSE | 10.72 |
| O43633 | 21   | ALNBAMBELDBE  | FALSE | TRUE | FALSE | 16.7  |
| O43633 | 22   | LNAMBELDBEB   | FALSE | TRUE | FALSE | 18.33 |
| O43633 | 23   | NBAMBELDBEBQ  | FALSE | TRUE | FALSE | 21.35 |
| O43633 | 24   | BAMBELDBEBQK  | FALSE | TRUE | FALSE | 11.25 |
| O43633 | 25   | AMBELDBEBQKL  | FALSE | TRUE | FALSE | 14.61 |
| O43633 | 27   | BELDBEBQKLET  | FALSE | TRUE | FALSE | 17.88 |
| O43633 | 29   | LDBEBQKLETQE  | FALSE | TRUE | FALSE | 14.86 |
| O43633 | 30   | DBEBQKLETQEK  | FALSE | TRUE | FALSE | 19.32 |
| O43633 | 31   | BEBQKLETQEKK  | FALSE | TRUE | FALSE | 20.47 |
| O43633 | 59   | VBIMAKDLVBTB  | FALSE | TRUE | FALSE | 14.74 |
| O43633 | 60   | BIMAKDLVBTBB  | FALSE | TRUE | FALSE | 10.76 |
| O43633 | 61   | IMAKDLVBTBBY  | FALSE | TRUE | FALSE | 23.49 |
| O43633 | 62   | MAKDLVBTBBYV  | FALSE | TRUE | FALSE | 15.12 |
| O43633 | 63   | AKDLVBTBBYVB  | FALSE | TRUE | FALSE | 10.22 |
| O43633 | 64   | KDLVBTBBYVBK  | FALSE | TRUE | FALSE | 10.05 |
| O43633 | 110  | MGTMBQLKLPQ   | FALSE | TRUE | FALSE | 16.09 |
| O43633 | 111  | GTMNBQLKLPQI  | FALSE | TRUE | FALSE | 12.05 |
| O43633 | 112  | TMNBQLKLPQIQ  | FALSE | TRUE | FALSE | 22.74 |
| O43633 | 128  | EFEBQAEIMDMK  | FALSE | TRUE | FALSE | 10.79 |
| O43633 | 129  | FEBQAEIMDMKE  | FALSE | TRUE | FALSE | 15.5  |
| P10909 | 88   | TBESETKLKELP  | FALSE | TRUE | FALSE | 11.21 |
| P10909 | 120  | TCMKFYABVCBS  | FALSE | TRUE | FALSE | 13.04 |
| P10909 | 121  | CMKFYABVCBSG  | FALSE | TRUE | FALSE | 14.52 |

|        |     |               |       |      |       |       |
|--------|-----|---------------|-------|------|-------|-------|
| P10909 | 122 | MKFYABVCBSGS  | FALSE | TRUE | FALSE | 15.81 |
| P10909 | 123 | KFYABVCBSGSG  | FALSE | TRUE | FALSE | 14.8  |
| P10909 | 124 | FYABVCBSGSGL  | FALSE | TRUE | FALSE | 17.61 |
| P10909 | 125 | YABVCBSGSGLV  | FALSE | TRUE | FALSE | 16.59 |
| P10909 | 126 | ABVCBSGSGLVG  | FALSE | TRUE | FALSE | 10.99 |
| P10909 | 127 | BVCBSGSGLVGB  | FALSE | TRUE | FALSE | 22.98 |
| P10909 | 128 | VCBSGSGLVGBQ  | FALSE | TRUE | FALSE | 38.87 |
| P10909 | 129 | CBSGSGLVGBQL  | FALSE | TRUE | FALSE | 38.91 |
| P10909 | 130 | BSGSGLVGBQLE  | FALSE | TRUE | FALSE | 36.42 |
| P10909 | 131 | SGSGLVGBQLEE  | FALSE | TRUE | FALSE | 13.17 |
| P10909 | 132 | GSGLVGBQLEEF  | FALSE | TRUE | FALSE | 10.56 |
| P10909 | 133 | SGLVGBQLEEF   | FALSE | TRUE | FALSE | 18.35 |
| P10909 | 135 | LVGBQLEEF     | FALSE | TRUE | FALSE | 24.44 |
| P10909 | 136 | VGBQLEEF      | FALSE | TRUE | FALSE | 20.91 |
| P10909 | 137 | GBQLEEF       | FALSE | TRUE | FALSE | 11.02 |
| P10909 | 157 | DBIDSLENDBQ   | FALSE | TRUE | FALSE | 10.16 |
| P10909 | 165 | NDBQQTHMLDVM  | FALSE | TRUE | FALSE | 10.6  |
| P10909 | 166 | DBQQTHMLDVMQ  | FALSE | TRUE | FALSE | 13.41 |
| P10909 | 174 | DVMQDHFSBASS  | FALSE | TRUE | FALSE | 19.28 |
| P10909 | 175 | VMQDHFSBASSI  | FALSE | TRUE | FALSE | 37.08 |
| P10909 | 176 | MQDHFSBASSII  | FALSE | TRUE | FALSE | 19.37 |
| P10909 | 177 | QDHFSBASSIID  | FALSE | TRUE | FALSE | 19.73 |
| P10909 | 178 | DHFSBASSIIDE  | FALSE | TRUE | FALSE | 21.82 |
| P10909 | 179 | HFSBASSIIDEL  | FALSE | TRUE | FALSE | 13.07 |
| P10909 | 187 | IDELFQDBFFTB  | FALSE | TRUE | FALSE | 22.39 |
| P10909 | 188 | DELFBQDBFFTB  | FALSE | TRUE | FALSE | 50.23 |
| P10909 | 189 | ELFBQDBFFTBEP | FALSE | TRUE | FALSE | 51.88 |
| P10909 | 190 | LFQDBFFTBEPQ  | FALSE | TRUE | FALSE | 80.15 |
| P10909 | 191 | FQDBFFTBEPQD  | FALSE | TRUE | FALSE | 85.41 |
| P10909 | 192 | QDBFFTBEPQDT  | FALSE | TRUE | FALSE | 80.44 |
| P10909 | 193 | DBFFTBEPQDTY  | FALSE | TRUE | FALSE | 64.08 |
| P10909 | 194 | BFFTBEPQDTYH  | FALSE | TRUE | FALSE | 74.46 |
| P10909 | 195 | FFTBEPQDTYHY  | FALSE | TRUE | FALSE | 28.57 |
| P10909 | 196 | FTBEPQDTYHYL  | FALSE | TRUE | FALSE | 29.43 |
| P10909 | 197 | TBEPQDTYHYLP  | FALSE | TRUE | FALSE | 12.08 |
| P10909 | 266 | AFQHPPTEFIBE  | FALSE | TRUE | FALSE | 12.75 |
| P10909 | 267 | FQHPPTEFIBEG  | FALSE | TRUE | FALSE | 13.28 |
| P10909 | 272 | TEFIBEGDDDBT  | FALSE | TRUE | FALSE | 11.78 |
| P10909 | 273 | EFIBEGDDDBTV  | FALSE | TRUE | FALSE | 10.97 |
| P10909 | 274 | FIBEGDDDBTVC  | FALSE | TRUE | FALSE | 13.18 |
| P10909 | 279 | DDDBTVCBEIBH  | FALSE | TRUE | FALSE | 11.84 |
| P10909 | 280 | DDBTVCBEIBHN  | FALSE | TRUE | FALSE | 17.01 |
| P10909 | 281 | DBTVCBEIBHNS  | FALSE | TRUE | FALSE | 17.67 |
| P10909 | 282 | BTVCBEIBHNST  | FALSE | TRUE | FALSE | 28.32 |
| P10909 | 283 | TVCBEIBHNSTG  | FALSE | TRUE | FALSE | 19.14 |
| P10909 | 284 | VCBEIBHNSTGC  | FALSE | TRUE | FALSE | 18.08 |
| P10909 | 285 | CBEIBHNSTGCL  | FALSE | TRUE | FALSE | 23.23 |
| P10909 | 286 | BEIBHNSTGCLB  | FALSE | TRUE | FALSE | 23.35 |
| P10909 | 289 | BHNSTGCLBMKD  | FALSE | TRUE | FALSE | 11.03 |
| P10909 | 314 | STNNPSQAKLBB  | FALSE | TRUE | FALSE | 12.11 |
| P10909 | 315 | TNNPSQAKLBBE  | FALSE | TRUE | FALSE | 21.54 |
| P10909 | 316 | NNPSQAKLBBEL  | FALSE | TRUE | FALSE | 23    |

|        |     |              |       |      |       |       |
|--------|-----|--------------|-------|------|-------|-------|
| P10909 | 317 | NPSQAKLBBELD | FALSE | TRUE | FALSE | 22.51 |
| P10909 | 318 | PSQAKLBBELDE | FALSE | TRUE | FALSE | 17.64 |
| P10909 | 319 | SQAKLBBELDES | FALSE | TRUE | FALSE | 27.82 |
| P10909 | 320 | QAKLBBELDESL | FALSE | TRUE | FALSE | 26.78 |
| P10909 | 321 | AKLBBELDESLQ | FALSE | TRUE | FALSE | 22.56 |
| P10909 | 322 | KLBBELDESLQV | FALSE | TRUE | FALSE | 17.46 |
| P10909 | 329 | ESLQVAEBLTBK | FALSE | TRUE | FALSE | 12.77 |
| P10909 | 330 | SLQVAEBLTBKY | FALSE | TRUE | FALSE | 21.61 |
| P10909 | 331 | LQVAEBLTBKYN | FALSE | TRUE | FALSE | 24.49 |
| P10909 | 332 | QVAEBLTBKYNE | FALSE | TRUE | FALSE | 20.86 |
| P10909 | 333 | VAEBLTBKYNEL | FALSE | TRUE | FALSE | 18.86 |
| P10909 | 334 | AEBLTBKYNELL | FALSE | TRUE | FALSE | 10.59 |
| P10909 | 335 | EBLTBKYNELLK | FALSE | TRUE | FALSE | 16.02 |
| P10909 | 368 | WWSBLANLTQGE | FALSE | TRUE | FALSE | 16.41 |
| P10909 | 369 | VSBLANLTQGED | FALSE | TRUE | FALSE | 11.38 |
| P10909 | 370 | SBLANLTQGEDQ | FALSE | TRUE | FALSE | 13.22 |
| P10909 | 376 | TQGEDQYYLBVT | FALSE | TRUE | FALSE | 11.29 |
| P10909 | 377 | QGEDQYYLBVTT | FALSE | TRUE | FALSE | 12.64 |
| P10909 | 438 | ALQEYBKKBHBE | FALSE | TRUE | FALSE | 28.87 |
| P00748 | 149 | IWYBTEQAAVAB | FALSE | TRUE | FALSE | 15.23 |
| P00748 | 150 | WYBTEQAAVABC | FALSE | TRUE | FALSE | 11.65 |
| P00748 | 151 | YBTEQAAVABCQ | FALSE | TRUE | FALSE | 10.22 |
| P00748 | 168 | AHCQBLASQACB | FALSE | TRUE | FALSE | 10.36 |
| P00748 | 171 | QBLASQACBTNP | FALSE | TRUE | FALSE | 16.71 |
| P00748 | 177 | ACBTNPCLHGGB | FALSE | TRUE | FALSE | 17.61 |
| P00748 | 178 | CBTNPCLHGGBC | FALSE | TRUE | FALSE | 10.04 |
| P00748 | 185 | HGGBCLEVEGHB | FALSE | TRUE | FALSE | 10.04 |
| P00748 | 210 | DVDTKASCYDGB | FALSE | TRUE | FALSE | 10.36 |
| P00748 | 211 | VDTKASCYDGBG | FALSE | TRUE | FALSE | 14.67 |
| P00748 | 212 | DTKASCYDGBGL | FALSE | TRUE | FALSE | 28.1  |
| P00748 | 213 | TKASCYDGBGLS | FALSE | TRUE | FALSE | 28.91 |
| P00748 | 214 | KASCYDGBGLSY | FALSE | TRUE | FALSE | 21.43 |
| P00748 | 215 | ASCYDGBGLSYB | FALSE | TRUE | FALSE | 23.01 |
| P00748 | 216 | SCYDGBGLSYBG | FALSE | TRUE | FALSE | 22.62 |
| P00748 | 217 | CYDGBGLSYBGL | FALSE | TRUE | FALSE | 31.9  |
| P00748 | 218 | YDGBGLSYBGLA | FALSE | TRUE | FALSE | 44.17 |
| P00748 | 219 | DGBGLSYBGLAB | FALSE | TRUE | FALSE | 24.9  |
| P00748 | 220 | GBGLSYBGLABT | FALSE | TRUE | FALSE | 49.69 |
| P00748 | 221 | BGLSYBGLABTT | FALSE | TRUE | FALSE | 62.9  |
| P00748 | 222 | GLSYBGLABTTL | FALSE | TRUE | FALSE | 45.5  |
| P00748 | 223 | LSYBGLABTTLS | FALSE | TRUE | FALSE | 45.96 |
| P00748 | 224 | SYBGLABTTLSG | FALSE | TRUE | FALSE | 59.88 |
| P00748 | 225 | YBGLABTTLSGA | FALSE | TRUE | FALSE | 38    |
| P00748 | 226 | BGLABTTLSGAP | FALSE | TRUE | FALSE | 23.55 |
| P00748 | 228 | LABTTLSGAPCQ | FALSE | TRUE | FALSE | 16.86 |
| P00748 | 229 | ABTTLSGAPCQP | FALSE | TRUE | FALSE | 12.82 |
| P00748 | 238 | CQPWASEATYBN | FALSE | TRUE | FALSE | 10.55 |
| P00748 | 239 | QPWASEATYBNV | FALSE | TRUE | FALSE | 10.17 |
| P00748 | 245 | ATYBNVTAEQAB | FALSE | TRUE | FALSE | 16.74 |
| P00748 | 246 | TYBNVTAEQABN | FALSE | TRUE | FALSE | 20.48 |
| P00748 | 247 | YBNVTAEQABNW | FALSE | TRUE | FALSE | 15.08 |
| P00748 | 277 | CFVLNBDBLSWE | FALSE | TRUE | FALSE | 10.79 |

|        |     |               |       |      |       |       |
|--------|-----|---------------|-------|------|-------|-------|
| P00748 | 278 | FVLNBDBLSWEY  | FALSE | TRUE | FALSE | 11.03 |
| P00748 | 279 | VLNBDBLSWEYC  | FALSE | TRUE | FALSE | 12.82 |
| P00748 | 280 | LNDBDBLSWEYCD | FALSE | TRUE | FALSE | 12.33 |
| P00748 | 342 | PAKBEQPPSLTB  | FALSE | TRUE | FALSE | 16.17 |
| P00748 | 343 | AKBEQPPSLTBN  | FALSE | TRUE | FALSE | 16.08 |
| P00748 | 344 | KBEQPPSLTBNG  | FALSE | TRUE | FALSE | 25.05 |
| P00748 | 345 | BEQPPSLTBNGP  | FALSE | TRUE | FALSE | 26.51 |
| P00748 | 346 | EQPPSLTBNGPL  | FALSE | TRUE | FALSE | 25.59 |
| P00748 | 347 | QPPSLTBNGPLS  | FALSE | TRUE | FALSE | 62.37 |
| P00748 | 348 | PPSLTBNGPLSC  | FALSE | TRUE | FALSE | 24.94 |
| P00748 | 349 | PSLTBNGPLSCG  | FALSE | TRUE | FALSE | 24.17 |
| P00748 | 350 | SLTBNGPLSCGQ  | FALSE | TRUE | FALSE | 41.45 |
| P00748 | 351 | LTBNGPLSCGQB  | FALSE | TRUE | FALSE | 45.9  |
| P00748 | 352 | TBNGPLSCGQBL  | FALSE | TRUE | FALSE | 30.43 |
| P00748 | 353 | BNGPLSCGQBLB  | FALSE | TRUE | FALSE | 23.35 |
| P00748 | 359 | CGQBLBKSLSSM  | FALSE | TRUE | FALSE | 11.56 |
| P00748 | 361 | QBLBKSLSSMTB  | FALSE | TRUE | FALSE | 20.55 |
| P00748 | 362 | BLBKSLSSMTBV  | FALSE | TRUE | FALSE | 12.54 |
| P00748 | 374 | VGGLVALBGAHP  | FALSE | TRUE | FALSE | 15.49 |
| P00748 | 375 | GGLVALBGAHPY  | FALSE | TRUE | FALSE | 12.97 |
| P00748 | 378 | VALBGAHPYIAA  | FALSE | TRUE | FALSE | 10.46 |
| P00748 | 437 | EPCQTLAVBSYB  | FALSE | TRUE | FALSE | 12.23 |
| P00748 | 572 | QAAEBBLTLQGI  | FALSE | TRUE | FALSE | 12.77 |
| P02452 | 39  | TCVQNGLBYHDB  | FALSE | TRUE | FALSE | 12.16 |
| P02452 | 40  | CVQNGLBYHDBD  | FALSE | TRUE | FALSE | 10.47 |
| P02452 | 41  | VQNGLBYHDBDV  | FALSE | TRUE | FALSE | 17.36 |
| P02452 | 42  | QNGLBYHDBDVW  | FALSE | TRUE | FALSE | 10.9  |
| P02452 | 43  | NGLBYHDBDVWK  | FALSE | TRUE | FALSE | 11.71 |
| P02452 | 44  | GLBYHDBDVWKP  | FALSE | TRUE | FALSE | 13.51 |
| P02452 | 45  | LBYHDBDVWKPE  | FALSE | TRUE | FALSE | 10.56 |
| P02452 | 117 | TGPBGPBGPAGP  | FALSE | TRUE | FALSE | 19.47 |
| P02452 | 118 | GPBGPBGPAGPP  | FALSE | TRUE | FALSE | 20.52 |
| P02452 | 119 | PBGPBGPAGPPG  | FALSE | TRUE | FALSE | 16.5  |
| P02452 | 120 | BGPBGPAGPPGB  | FALSE | TRUE | FALSE | 21.11 |
| P02452 | 121 | GPBGPAGPPGBD  | FALSE | TRUE | FALSE | 12.47 |
| P02452 | 122 | PBGPAGPPGBDG  | FALSE | TRUE | FALSE | 11.9  |
| P02452 | 123 | BGPAGPPGBDGI  | FALSE | TRUE | FALSE | 17.01 |
| P02452 | 182 | GPSGPBGLPGPP  | FALSE | TRUE | FALSE | 10.69 |
| P02452 | 184 | SGPBGLPGPPGA  | FALSE | TRUE | FALSE | 13.97 |
| P02452 | 186 | PBGLPGPPGAPG  | FALSE | TRUE | FALSE | 12.29 |
| P02452 | 220 | BGPPGPPGKNGD  | FALSE | TRUE | FALSE | 10.83 |
| P02452 | 237 | KPGBPGEBGPPG  | FALSE | TRUE | FALSE | 10.5  |
| P02452 | 239 | GBPGEBGPPGPQ  | FALSE | TRUE | FALSE | 11.61 |
| P02452 | 240 | BPGEGBPPGPQG  | FALSE | TRUE | FALSE | 12.04 |
| P02452 | 242 | GEBGPPGPQGAB  | FALSE | TRUE | FALSE | 12.16 |
| P02452 | 243 | EBGPPGPQGABG  | FALSE | TRUE | FALSE | 16.56 |
| P02452 | 244 | BGPPGPQGABGL  | FALSE | TRUE | FALSE | 24.66 |
| P02452 | 245 | GPPGPQGABGLP  | FALSE | TRUE | FALSE | 18.05 |
| P02452 | 246 | PPGPQGABGLPG  | FALSE | TRUE | FALSE | 18.48 |
| P02452 | 247 | PGPQGABGLPGT  | FALSE | TRUE | FALSE | 15.32 |
| P02452 | 248 | GPQGABGLPGTA  | FALSE | TRUE | FALSE | 24.08 |
| P02452 | 249 | PQGABGLPGTAG  | FALSE | TRUE | FALSE | 16.06 |



|        |     |               |       |      |       |       |
|--------|-----|---------------|-------|------|-------|-------|
| P02452 | 250 | QGABGLPGTAGL  | FALSE | TRUE | FALSE | 32.99 |
| P02452 | 251 | GABGLPGTAGLP  | FALSE | TRUE | FALSE | 34.57 |
| P02452 | 252 | ABGLPGTAGLPG  | FALSE | TRUE | FALSE | 21.64 |
| P02452 | 263 | GMKGHBGFSGLD  | FALSE | TRUE | FALSE | 11    |
| P02452 | 264 | MKGHBGFSGLDG  | FALSE | TRUE | FALSE | 15.45 |
| P02452 | 265 | KGHBGFSGLDGA  | FALSE | TRUE | FALSE | 11.31 |
| P02452 | 266 | GHBGFSGLDGAK  | FALSE | TRUE | FALSE | 10.3  |
| P02452 | 267 | HGBGFSGLDGAKG | FALSE | TRUE | FALSE | 20.57 |
| P02452 | 300 | QMGPBGLPGEBG  | FALSE | TRUE | FALSE | 10.11 |
| P02452 | 302 | GPBGLPGEBGBP  | FALSE | TRUE | FALSE | 13.07 |
| P02452 | 303 | PBGLPGEBGBPG  | FALSE | TRUE | FALSE | 11.56 |
| P02452 | 304 | BGLPGEBGBPGA  | FALSE | TRUE | FALSE | 11.78 |
| P02452 | 310 | BGBPGAPGPAGA  | FALSE | TRUE | FALSE | 11.08 |
| P02452 | 313 | PGAPGPAGABGN  | FALSE | TRUE | FALSE | 14.9  |
| P02452 | 314 | GAPGPAGABGND  | FALSE | TRUE | FALSE | 14.03 |
| P02452 | 315 | APGPAGABGNDG  | FALSE | TRUE | FALSE | 18.81 |
| P02452 | 316 | PGPAGABGNDGA  | FALSE | TRUE | FALSE | 17.36 |
| P02452 | 317 | GPAGABGNDGAT  | FALSE | TRUE | FALSE | 22.45 |
| P02452 | 318 | PAGABGNDGATG  | FALSE | TRUE | FALSE | 31.51 |
| P02452 | 319 | AGABGNDGATGA  | FALSE | TRUE | FALSE | 22.61 |
| P02452 | 321 | ABGNDGATGAAG  | FALSE | TRUE | FALSE | 11.03 |
| P02452 | 354 | EAGPQGPBGSEG  | FALSE | TRUE | FALSE | 10.06 |
| P02452 | 355 | AGPQGPBGSEGP  | FALSE | TRUE | FALSE | 15.6  |
| P02452 | 356 | GPQGPBGSEGPQ  | FALSE | TRUE | FALSE | 17.3  |
| P02452 | 357 | PQGPBGSEGPQG  | FALSE | TRUE | FALSE | 11.07 |
| P02452 | 358 | QGPBGSEGPQGV  | FALSE | TRUE | FALSE | 25.98 |
| P02452 | 359 | GPBGSEGPQGVV  | FALSE | TRUE | FALSE | 27.51 |
| P02452 | 360 | PBGSEGPQGVVB  | FALSE | TRUE | FALSE | 19.26 |
| P02452 | 361 | BGSEGPQGVVBGE | FALSE | TRUE | FALSE | 16.65 |
| P02452 | 365 | GPQGVVBGEPGPP | FALSE | TRUE | FALSE | 14.39 |
| P02452 | 366 | PQGVVBGEPGPPG | FALSE | TRUE | FALSE | 13.98 |
| P02452 | 367 | QGVVBGEPGPPGP | FALSE | TRUE | FALSE | 19.69 |
| P02452 | 368 | GVBGEPGPPGPA  | FALSE | TRUE | FALSE | 12.58 |
| P02452 | 369 | VBGEPGPPGPAG  | FALSE | TRUE | FALSE | 13.61 |
| P02452 | 370 | BGEPGPPGPAGA  | FALSE | TRUE | FALSE | 10.45 |
| P02452 | 405 | IAGAPGFPGABG  | FALSE | TRUE | FALSE | 10.6  |
| P02452 | 406 | AGAPGFPGABGP  | FALSE | TRUE | FALSE | 19.95 |
| P02452 | 407 | GAPGFPGABGPS  | FALSE | TRUE | FALSE | 21.09 |
| P02452 | 408 | APGFPGABGPSG  | FALSE | TRUE | FALSE | 21.6  |
| P02452 | 409 | PGFPGABGPSGP  | FALSE | TRUE | FALSE | 18.29 |
| P02452 | 410 | GFPGABGPSGPQ  | FALSE | TRUE | FALSE | 37.26 |
| P02452 | 411 | FPGABGPSGPQG  | FALSE | TRUE | FALSE | 31.41 |
| P02452 | 412 | PGABGPSGPQGP  | FALSE | TRUE | FALSE | 25.2  |
| P02452 | 413 | GABGPSGPQGGPG | FALSE | TRUE | FALSE | 30.92 |
| P02452 | 414 | ABGPSGPQGGPGG | FALSE | TRUE | FALSE | 14    |
| P02452 | 462 | PAGEEGKBGABG  | FALSE | TRUE | FALSE | 11.99 |
| P02452 | 463 | AGEEGKBGABGE  | FALSE | TRUE | FALSE | 15.15 |
| P02452 | 464 | GEEGKBGABGEP  | FALSE | TRUE | FALSE | 15.27 |
| P02452 | 465 | EEGKBGABGEPG  | FALSE | TRUE | FALSE | 16.73 |
| P02452 | 466 | EGKBGABGEPGP  | FALSE | TRUE | FALSE | 23.64 |
| P02452 | 467 | GKBGABGEPGPT  | FALSE | TRUE | FALSE | 13.81 |
| P02452 | 468 | KBGABGEPGPTG  | FALSE | TRUE | FALSE | 20.43 |

|        |     |               |       |      |       |       |
|--------|-----|---------------|-------|------|-------|-------|
| P02452 | 469 | BGABGEPGPTGL  | FALSE | TRUE | FALSE | 45.84 |
| P02452 | 470 | GABGEPGPTGLP  | FALSE | TRUE | FALSE | 35.32 |
| P02452 | 471 | ABGEPGPTGLPG  | FALSE | TRUE | FALSE | 22.68 |
| P02452 | 472 | BGEPGPTGLPGP  | FALSE | TRUE | FALSE | 11.43 |
| P02452 | 482 | GPPGEBGGPGSB  | FALSE | TRUE | FALSE | 14.32 |
| P02452 | 483 | PPGEBGGPGSBG  | FALSE | TRUE | FALSE | 15.53 |
| P02452 | 484 | PGEGBGGPGSBGF | FALSE | TRUE | FALSE | 14.54 |
| P02452 | 485 | GEBGGPGSBGFP  | FALSE | TRUE | FALSE | 24.62 |
| P02452 | 486 | EBGGPGSBGFPG  | FALSE | TRUE | FALSE | 22.73 |
| P02452 | 487 | BGGPGSBGFPGA  | FALSE | TRUE | FALSE | 30.69 |
| P02452 | 488 | GGPGSBGFPGAD  | FALSE | TRUE | FALSE | 24.54 |
| P02452 | 489 | GPGSBGFPGADG  | FALSE | TRUE | FALSE | 25.53 |
| P02452 | 490 | PGSBGFPGADGV  | FALSE | TRUE | FALSE | 20.06 |
| P02452 | 491 | GSBGFPGADGVA  | FALSE | TRUE | FALSE | 10.89 |
| P02452 | 492 | SBGFPGADGVAG  | FALSE | TRUE | FALSE | 22.78 |
| P02452 | 508 | AGEBGSPGPAGP  | FALSE | TRUE | FALSE | 13.74 |
| P02452 | 509 | GEBGSPGPAGPK  | FALSE | TRUE | FALSE | 11.29 |
| P02452 | 510 | EBGSPGPAGPKG  | FALSE | TRUE | FALSE | 10.78 |
| P02452 | 565 | PGPPGPPGABGQ  | FALSE | TRUE | FALSE | 21.86 |
| P02452 | 567 | PPGPPGABGQAG  | FALSE | TRUE | FALSE | 16.85 |
| P02452 | 568 | PGPPGABGQAGV  | FALSE | TRUE | FALSE | 19.01 |
| P02452 | 569 | GPPGABGQAGVM  | FALSE | TRUE | FALSE | 26.18 |
| P02452 | 570 | PPGABGQAGVMG  | FALSE | TRUE | FALSE | 22.13 |
| P02452 | 571 | PGABGQAGVMGF  | FALSE | TRUE | FALSE | 25.67 |
| P02452 | 572 | GABGQAGVMGFP  | FALSE | TRUE | FALSE | 46.84 |
| P02452 | 573 | ABGQAGVMGFPG  | FALSE | TRUE | FALSE | 29.38 |
| P02452 | 574 | BGQAGVMGFPGP  | FALSE | TRUE | FALSE | 11.75 |
| P02452 | 667 | LGAPGPSGABGE  | FALSE | TRUE | FALSE | 10.56 |
| P02452 | 668 | GAPGPSGABGEB  | FALSE | TRUE | FALSE | 15.18 |
| P02452 | 669 | APGPSGABGEBG  | FALSE | TRUE | FALSE | 13.23 |
| P02452 | 670 | PGPSGABGEBGF  | FALSE | TRUE | FALSE | 19.43 |
| P02452 | 671 | GPSGABGEBGFP  | FALSE | TRUE | FALSE | 27.16 |
| P02452 | 672 | PSGABGEBGFPG  | FALSE | TRUE | FALSE | 23.81 |
| P02452 | 673 | SGABGEBGFPGE  | FALSE | TRUE | FALSE | 31.6  |
| P02452 | 674 | GABGEBGFPGEB  | FALSE | TRUE | FALSE | 25.16 |
| P02452 | 675 | ABGEBGFPGEBG  | FALSE | TRUE | FALSE | 22.36 |
| P02452 | 676 | BGEBGFPGEBGV  | FALSE | TRUE | FALSE | 26.07 |
| P02452 | 677 | GEBGFPGEBGVQ  | FALSE | TRUE | FALSE | 18.61 |
| P02452 | 678 | EBGFPGEBGVQG  | FALSE | TRUE | FALSE | 10.76 |
| P02452 | 679 | BGFPGEBGVQGP  | FALSE | TRUE | FALSE | 24.54 |
| P02452 | 680 | GFPGEBGVQGPP  | FALSE | TRUE | FALSE | 13.27 |
| P02452 | 681 | FPGEBGVQGPPG  | FALSE | TRUE | FALSE | 16.28 |
| P02452 | 693 | PAGPBGANGAPG  | FALSE | TRUE | FALSE | 10.75 |
| P02452 | 694 | AGPBGANGAPGN  | FALSE | TRUE | FALSE | 18.34 |
| P02452 | 695 | GPBGANGAPGND  | FALSE | TRUE | FALSE | 18.29 |
| P02452 | 696 | PBGANGAPGNDG  | FALSE | TRUE | FALSE | 14.31 |
| P02452 | 697 | BGANGAPGNDGA  | FALSE | TRUE | FALSE | 11.4  |
| P02452 | 728 | GMPGEBGAAGLP  | FALSE | TRUE | FALSE | 11.6  |
| P02452 | 729 | MPGEBGAAGLPG  | FALSE | TRUE | FALSE | 12.19 |
| P02452 | 730 | PGEGBGAAGLPGP | FALSE | TRUE | FALSE | 12.77 |
| P02452 | 731 | GEBGAAGLPGPK  | FALSE | TRUE | FALSE | 13.56 |
| P02452 | 732 | EBGAAGLPGPKG  | FALSE | TRUE | FALSE | 14.27 |

|        |      |              |       |      |       |       |
|--------|------|--------------|-------|------|-------|-------|
| P02452 | 733  | BGAAGLPGPKGD | FALSE | TRUE | FALSE | 14.7  |
| P02452 | 743  | GDBGDAGPKGAD | FALSE | TRUE | FALSE | 11.97 |
| P02452 | 744  | DBGDAGPKGADG | FALSE | TRUE | FALSE | 11.74 |
| P02452 | 745  | BGDAGPKGADGS | FALSE | TRUE | FALSE | 10.76 |
| P02452 | 756  | SPGKDGVBGLTG | FALSE | TRUE | FALSE | 10.05 |
| P02452 | 758  | GKDGVBGLTGPI | FALSE | TRUE | FALSE | 11.16 |
| P02452 | 759  | KDGVBGLTGPIG | FALSE | TRUE | FALSE | 10.86 |
| P02452 | 760  | DGVBGLTGPIGP | FALSE | TRUE | FALSE | 14.28 |
| P02452 | 761  | GVBGLTGPIGPP | FALSE | TRUE | FALSE | 15.38 |
| P02452 | 762  | VBGLTGPIGPPG | FALSE | TRUE | FALSE | 12.99 |
| P02452 | 787  | SGPAGPTGABGA | FALSE | TRUE | FALSE | 13.65 |
| P02452 | 788  | GPAGPTGABGAP | FALSE | TRUE | FALSE | 11.34 |
| P02452 | 789  | PAGPTGABGAPG | FALSE | TRUE | FALSE | 13.6  |
| P02452 | 790  | AGPTGABGAPGD | FALSE | TRUE | FALSE | 18.65 |
| P02452 | 791  | GPTGABGAPGDB | FALSE | TRUE | FALSE | 19.44 |
| P02452 | 792  | PTGABGAPGDBG | FALSE | TRUE | FALSE | 14.95 |
| P02452 | 793  | TGABGAPGDBG  | FALSE | TRUE | FALSE | 30.55 |
| P02452 | 794  | GABGAPGDBGEP | FALSE | TRUE | FALSE | 35.39 |
| P02452 | 795  | ABGAPGDBGEPG | FALSE | TRUE | FALSE | 28.51 |
| P02452 | 796  | BGAPGDBGEPGP | FALSE | TRUE | FALSE | 21.05 |
| P02452 | 863  | GABGSAGPPGAT | FALSE | TRUE | FALSE | 19.87 |
| P02452 | 864  | ABGSAGPPGATG | FALSE | TRUE | FALSE | 18.27 |
| P02452 | 865  | BGSAGPPGATGF | FALSE | TRUE | FALSE | 10.01 |
| P02452 | 879  | AAGBVGPPGPSG | FALSE | TRUE | FALSE | 10.34 |
| P02452 | 880  | AGBVGPPGPSGN | FALSE | TRUE | FALSE | 13.51 |
| P02452 | 881  | GBVGPPGPSGNA | FALSE | TRUE | FALSE | 12.82 |
| P02452 | 907  | KGPBGETGPAGB | FALSE | TRUE | FALSE | 16.05 |
| P02452 | 908  | GPBGETGPAGBP | FALSE | TRUE | FALSE | 16.56 |
| P02452 | 950  | GPQGIAGQBGVV | FALSE | TRUE | FALSE | 16.84 |
| P02452 | 951  | PQGIAGQBGVVG | FALSE | TRUE | FALSE | 15.35 |
| P02452 | 952  | QGIAGQBGVVGL | FALSE | TRUE | FALSE | 20.28 |
| P02452 | 953  | GIAGQBGVVGLP | FALSE | TRUE | FALSE | 21.42 |
| P02452 | 954  | IAGQBGVVGLPG | FALSE | TRUE | FALSE | 29.42 |
| P02452 | 955  | AGQBGVVGLPGQ | FALSE | TRUE | FALSE | 33.12 |
| P02452 | 956  | GQBGVVGLPGQB | FALSE | TRUE | FALSE | 34.03 |
| P02452 | 957  | QBGVVGLPGQBG | FALSE | TRUE | FALSE | 28.24 |
| P02452 | 958  | BGVVGLPGQBGE | FALSE | TRUE | FALSE | 20.65 |
| P02452 | 959  | GVVGLPGQBGE  | FALSE | TRUE | FALSE | 11.17 |
| P02452 | 960  | VVGLPGQBGE   | FALSE | TRUE | FALSE | 11.1  |
| P02452 | 961  | VGLPGQBGE    | FALSE | TRUE | FALSE | 21.28 |
| P02452 | 962  | GLPGQBGE     | FALSE | TRUE | FALSE | 28.41 |
| P02452 | 963  | LPGQBGE      | FALSE | TRUE | FALSE | 34.18 |
| P02452 | 964  | PGQBGE       | FALSE | TRUE | FALSE | 24.2  |
| P02452 | 965  | GQBGE        | FALSE | TRUE | FALSE | 39.58 |
| P02452 | 966  | QBGE         | FALSE | TRUE | FALSE | 39.89 |
| P02452 | 967  | BGEBG        | FALSE | TRUE | FALSE | 28.11 |
| P02452 | 968  | GEBG         | FALSE | TRUE | FALSE | 13.71 |
| P02452 | 969  | EBG          | FALSE | TRUE | FALSE | 12.04 |
| P02452 | 970  | BGFP         | FALSE | TRUE | FALSE | 11.53 |
| P02452 | 1012 | SGBEGAPGAEGS | FALSE | TRUE | FALSE | 21.38 |
| P02452 | 1013 | GBEGAPGAEGSP | FALSE | TRUE | FALSE | 15.34 |
| P02452 | 1023 | SPGBDGS      | FALSE | TRUE | FALSE | 14.83 |

|        |      |                   |       |      |       |       |
|--------|------|-------------------|-------|------|-------|-------|
| P02452 | 1024 | PBGDGSPPGAKGD     | FALSE | TRUE | FALSE | 13.37 |
| P02452 | 1025 | GBDGSPGAKGDB      | FALSE | TRUE | FALSE | 20.35 |
| P02452 | 1026 | BDGSPGAKGDBG      | FALSE | TRUE | FALSE | 12.02 |
| P02452 | 1033 | KGDBGETGPAGP      | FALSE | TRUE | FALSE | 10.59 |
| P02452 | 1036 | BGETGPAGPPGA      | FALSE | TRUE | FALSE | 12.31 |
| P02452 | 1064 | GDBGETGPAGPT      | FALSE | TRUE | FALSE | 10.69 |
| P02452 | 1066 | BGETGPAGPTGP      | FALSE | TRUE | FALSE | 11.9  |
| P02452 | 1074 | PTGVPVGPVABG      | FALSE | TRUE | FALSE | 11.46 |
| P02452 | 1075 | TGVPVGPVABGP      | FALSE | TRUE | FALSE | 17.65 |
| P02452 | 1076 | GPVGPVGPVABGPA    | FALSE | TRUE | FALSE | 14    |
| P02452 | 1077 | PVGPVGPVABGPAG    | FALSE | TRUE | FALSE | 12.14 |
| P02452 | 1078 | VGPVGPVABGPAGP    | FALSE | TRUE | FALSE | 22.6  |
| P02452 | 1079 | GPVGPVABGPAGPQ    | FALSE | TRUE | FALSE | 29.96 |
| P02452 | 1080 | PVGPVGPVABGPAGPQ  | FALSE | TRUE | FALSE | 18.75 |
| P02452 | 1081 | VGPVGPVABGPAGPQGP | FALSE | TRUE | FALSE | 29.58 |
| P02452 | 1082 | GABGPAGPQGPB      | FALSE | TRUE | FALSE | 31.44 |
| P02452 | 1083 | ABGPAGPQGPBG      | FALSE | TRUE | FALSE | 21.04 |
| P02452 | 1084 | BGPAGPQGPBGD      | FALSE | TRUE | FALSE | 10.45 |
| P02452 | 1085 | GPAGPQGPBGDK      | FALSE | TRUE | FALSE | 11.63 |
| P02452 | 1086 | PAGPQGPBGDKG      | FALSE | TRUE | FALSE | 12.73 |
| P02452 | 1087 | AGPQGPBGDKGE      | FALSE | TRUE | FALSE | 10.55 |
| P02452 | 1088 | GPQGPBGDKGET      | FALSE | TRUE | FALSE | 13.8  |
| P02452 | 1089 | PQGPBGDKGETG      | FALSE | TRUE | FALSE | 13.66 |
| P02452 | 1090 | QGPBGDKGETGE      | FALSE | TRUE | FALSE | 14.25 |
| P02452 | 1091 | GPBGDKGETGEQ      | FALSE | TRUE | FALSE | 16.34 |
| P02452 | 1100 | GEQGDBGIKGHB      | FALSE | TRUE | FALSE | 20.76 |
| P02452 | 1101 | EQGDBGIKGHBG      | FALSE | TRUE | FALSE | 21.88 |
| P02452 | 1102 | QGDBGIKGHBGF      | FALSE | TRUE | FALSE | 22.98 |
| P02452 | 1103 | GDBGIKGHBGFS      | FALSE | TRUE | FALSE | 20.97 |
| P02452 | 1104 | DBGIKGHBGFSG      | FALSE | TRUE | FALSE | 18.28 |
| P02452 | 1110 | HBGFSGLQGPPG      | FALSE | TRUE | FALSE | 19.91 |
| P02452 | 1135 | SGPAGPBGPSPGS     | FALSE | TRUE | FALSE | 11.56 |
| P02452 | 1138 | AGPBGPSPGSAGA     | FALSE | TRUE | FALSE | 17.1  |
| P02452 | 1140 | PBGPSPGSAGAPG     | FALSE | TRUE | FALSE | 14.06 |
| P02452 | 1160 | GPIGPPGPBGBT      | FALSE | TRUE | FALSE | 15.59 |
| P02452 | 1161 | PIGPPGPBGBTG      | FALSE | TRUE | FALSE | 16.74 |
| P02452 | 1162 | IGPPGPBGBTGD      | FALSE | TRUE | FALSE | 18.85 |
| P02452 | 1163 | GPPGPBGBTGDA      | FALSE | TRUE | FALSE | 19    |
| P02452 | 1164 | PPGPBGBTGDAG      | FALSE | TRUE | FALSE | 17.1  |
| P02452 | 1165 | PGPBGBTGDAGP      | FALSE | TRUE | FALSE | 22.72 |
| P02452 | 1166 | GPBGBTGDAGPV      | FALSE | TRUE | FALSE | 43.23 |
| P02452 | 1167 | PBGBTGDAGPVG      | FALSE | TRUE | FALSE | 31.11 |
| P02452 | 1168 | BGBTGDAGPVGP      | FALSE | TRUE | FALSE | 28.56 |
| P02452 | 1169 | GBTGDAGPVGPP      | FALSE | TRUE | FALSE | 12.93 |
| P02452 | 1206 | QEKAHDGGBYYB      | FALSE | TRUE | FALSE | 18.5  |
| P02452 | 1207 | EKAHDGGBYYBA      | FALSE | TRUE | FALSE | 19.7  |
| P02452 | 1208 | KAHDGGBYYBAD      | FALSE | TRUE | FALSE | 22.56 |
| P02452 | 1209 | AHDGGBYYBADD      | FALSE | TRUE | FALSE | 21.1  |
| P02452 | 1210 | HDGGBYYBADDA      | FALSE | TRUE | FALSE | 22.11 |
| P02452 | 1211 | DGGBYYBADDAN      | FALSE | TRUE | FALSE | 22.17 |
| P02452 | 1212 | GGBYYBADDANV      | FALSE | TRUE | FALSE | 31.97 |
| P02452 | 1213 | GBYYBADDANVV      | FALSE | TRUE | FALSE | 30.4  |

|        |      |              |       |      |       |       |
|--------|------|--------------|-------|------|-------|-------|
| P02452 | 1214 | BYYBADDANVVB | FALSE | TRUE | FALSE | 19.73 |
| P02452 | 1215 | YYBADDANVVBD | FALSE | TRUE | FALSE | 17.84 |
| P02452 | 1223 | VVBDBDLEVDTT | FALSE | TRUE | FALSE | 12.45 |
| P02452 | 1244 | NIBSPEGSBKNP | FALSE | TRUE | FALSE | 15.61 |
| P02452 | 1245 | IBSPEGSBKNPA | FALSE | TRUE | FALSE | 13.72 |
| P02452 | 1246 | BSPEGSBKNPAB | FALSE | TRUE | FALSE | 27.24 |
| P02452 | 1247 | SPEGSBKNPABT | FALSE | TRUE | FALSE | 11.31 |
| P02452 | 1249 | EGSBKNPABTCB | FALSE | TRUE | FALSE | 17.75 |
| P02452 | 1250 | GSBKNPABTCBD | FALSE | TRUE | FALSE | 15.48 |
| P02452 | 1251 | SBKNPABTCBDL | FALSE | TRUE | FALSE | 20.5  |
| P02452 | 1256 | ABTCBDLKMCHS | FALSE | TRUE | FALSE | 12.05 |
| P02452 | 1395 | EIEIBAEGNSBF | FALSE | TRUE | FALSE | 16.56 |
| P02452 | 1396 | IEIBAEGNSBFT | FALSE | TRUE | FALSE | 21.86 |
| P02452 | 1397 | EIBAEGNSBFTY | FALSE | TRUE | FALSE | 10.56 |
| P02452 | 1398 | IBAEGNSBFTYS | FALSE | TRUE | FALSE | 20.22 |
| P02452 | 1399 | BAEGNSBFTYSV | FALSE | TRUE | FALSE | 21.12 |
| P02458 | 38   | GQBYNDKDVWKP | FALSE | TRUE | FALSE | 12.73 |
| P02458 | 129  | GEQGPBGDBGDK | FALSE | TRUE | FALSE | 10.82 |
| P02458 | 130  | EQGPBGDBGDKG | FALSE | TRUE | FALSE | 13.38 |
| P02458 | 131  | QGPBGDBGDKGE | FALSE | TRUE | FALSE | 13.52 |
| P02458 | 132  | GPBGDBGDKGEK | FALSE | TRUE | FALSE | 15.64 |
| P02458 | 133  | PBGDBGDKGEKG | FALSE | TRUE | FALSE | 17.75 |
| P02458 | 134  | BGDBGDKGEKGA | FALSE | TRUE | FALSE | 22.02 |
| P02458 | 143  | KGAPGPBGBDGE | FALSE | TRUE | FALSE | 11.42 |
| P02458 | 144  | GAPGPBGBDGEP | FALSE | TRUE | FALSE | 14.73 |
| P02458 | 145  | APGPBGBDGEPG | FALSE | TRUE | FALSE | 14.25 |
| P02458 | 146  | PGPBGBDGEPT  | FALSE | TRUE | FALSE | 16.9  |
| P02458 | 147  | GPBGBDGEPGTP | FALSE | TRUE | FALSE | 27.19 |
| P02458 | 148  | PBGBDGEPGTPG | FALSE | TRUE | FALSE | 20.67 |
| P02458 | 149  | BGBDGEPTPGN  | FALSE | TRUE | FALSE | 24.72 |
| P02458 | 206  | MGPBGPPGPAGA | FALSE | TRUE | FALSE | 10.29 |
| P02458 | 264  | GEBGPPGPQGAB | FALSE | TRUE | FALSE | 12.16 |
| P02458 | 265  | EBGPPGPQGABG | FALSE | TRUE | FALSE | 16.56 |
| P02458 | 266  | BGPPGPQGABGF | FALSE | TRUE | FALSE | 28.84 |
| P02458 | 267  | GPPGPQGABGFP | FALSE | TRUE | FALSE | 28.37 |
| P02458 | 268  | PPGPQGABGFPG | FALSE | TRUE | FALSE | 23.52 |
| P02458 | 269  | PGPQGABGFPGT | FALSE | TRUE | FALSE | 20.48 |
| P02458 | 270  | GPQGABGFPGTP | FALSE | TRUE | FALSE | 32.42 |
| P02458 | 271  | PQGABGFPGTPG | FALSE | TRUE | FALSE | 21.7  |
| P02458 | 272  | QGABGFPGTPGL | FALSE | TRUE | FALSE | 48.63 |
| P02458 | 273  | GABGFPGTPGLP | FALSE | TRUE | FALSE | 50.86 |
| P02458 | 274  | ABGFPGTPGLPG | FALSE | TRUE | FALSE | 27.4  |
| P02458 | 275  | BGFPGTPGLPGV | FALSE | TRUE | FALSE | 12.09 |
| P02458 | 285  | GVKGHBGYPGLD | FALSE | TRUE | FALSE | 17.71 |
| P02458 | 286  | VKGHBGYPGLDG | FALSE | TRUE | FALSE | 18.97 |
| P02458 | 287  | KGHBGYPGLDGA | FALSE | TRUE | FALSE | 13.76 |
| P02458 | 288  | GHBGYPGLDGAK | FALSE | TRUE | FALSE | 11.9  |
| P02458 | 289  | HBGYPGLDGAKG | FALSE | TRUE | FALSE | 22.6  |
| P02458 | 290  | BGYPLDGAKGE  | FALSE | TRUE | FALSE | 11.7  |
| P02458 | 324  | GPBGLPGEBGBT | FALSE | TRUE | FALSE | 21.05 |
| P02458 | 325  | PBGLPGEBGBTG | FALSE | TRUE | FALSE | 20.27 |
| P02458 | 326  | BGLPGEBGBTGP | FALSE | TRUE | FALSE | 23.64 |

|        |     |              |       |      |       |       |
|--------|-----|--------------|-------|------|-------|-------|
| P02458 | 327 | GLPGEBGBTGPA | FALSE | TRUE | FALSE | 18.81 |
| P02458 | 328 | LPGEBGBTGPAG | FALSE | TRUE | FALSE | 21.52 |
| P02458 | 329 | PGEBGBTGPAGA | FALSE | TRUE | FALSE | 14.7  |
| P02458 | 331 | EBGBTGPAGAAG | FALSE | TRUE | FALSE | 16.19 |
| P02458 | 332 | BGBTGPAGAAGA | FALSE | TRUE | FALSE | 12.28 |
| P02458 | 334 | BTGPAGAAGABG | FALSE | TRUE | FALSE | 10.54 |
| P02458 | 335 | TGPAGAAGABGN | FALSE | TRUE | FALSE | 10.06 |
| P02458 | 337 | PAGAAGABGNDG | FALSE | TRUE | FALSE | 12.31 |
| P02458 | 338 | AGAAGABGNDGQ | FALSE | TRUE | FALSE | 16.61 |
| P02458 | 339 | GAAGABGNDGQP | FALSE | TRUE | FALSE | 19.16 |
| P02458 | 340 | AAGABGNDGQPG | FALSE | TRUE | FALSE | 22.2  |
| P02458 | 341 | AGABGNDGQPGP | FALSE | TRUE | FALSE | 29.86 |
| P02458 | 342 | GABGNDGQPGPA | FALSE | TRUE | FALSE | 23.61 |
| P02458 | 343 | ABGNDGQPGPAG | FALSE | TRUE | FALSE | 16.31 |
| P02458 | 377 | AGPTGABGPEGA | FALSE | TRUE | FALSE | 10.48 |
| P02458 | 378 | GPTGABGPEGAQ | FALSE | TRUE | FALSE | 10.95 |
| P02458 | 380 | TGABGPEGAQGP | FALSE | TRUE | FALSE | 16.35 |
| P02458 | 381 | GABGPEGAQGPB | FALSE | TRUE | FALSE | 21.9  |
| P02458 | 382 | ABGPEGAQGPBG | FALSE | TRUE | FALSE | 16.76 |
| P02458 | 389 | QGPBGEPGTPGS | FALSE | TRUE | FALSE | 10.2  |
| P02458 | 390 | GPBGEPGTPGSP | FALSE | TRUE | FALSE | 10.7  |
| P02458 | 391 | PBGEPGTPGSPG | FALSE | TRUE | FALSE | 11.39 |
| P02458 | 432 | GFPGPBGPPGPQ | FALSE | TRUE | FALSE | 14.66 |
| P02458 | 433 | FPGPBGPPGPQG | FALSE | TRUE | FALSE | 15.99 |
| P02458 | 434 | PGPBGPQGPQGA | FALSE | TRUE | FALSE | 12.13 |
| P02458 | 435 | GPBGPPGPQGAT | FALSE | TRUE | FALSE | 11.67 |
| P02458 | 436 | PBGPPGPQGATG | FALSE | TRUE | FALSE | 14.26 |
| P02458 | 484 | PAGEEGKBGABG | FALSE | TRUE | FALSE | 11.99 |
| P02458 | 485 | AGEEGKBGABGE | FALSE | TRUE | FALSE | 15.15 |
| P02458 | 486 | GEEGKBGABGEP | FALSE | TRUE | FALSE | 15.27 |
| P02458 | 487 | EEGKBGABGEPG | FALSE | TRUE | FALSE | 16.73 |
| P02458 | 488 | EGKBGABGEPGG | FALSE | TRUE | FALSE | 15.8  |
| P02458 | 489 | GKBGABGEPGGV | FALSE | TRUE | FALSE | 18.26 |
| P02458 | 490 | KBGABGEPGGVG | FALSE | TRUE | FALSE | 18.39 |
| P02458 | 491 | BGABGEPGGVGP | FALSE | TRUE | FALSE | 34.78 |
| P02458 | 492 | GABGEPGGVGPI | FALSE | TRUE | FALSE | 33.84 |
| P02458 | 493 | ABGEPGGVGPIG | FALSE | TRUE | FALSE | 17.38 |
| P02458 | 503 | IGPPGEBGAPGN | FALSE | TRUE | FALSE | 14.41 |
| P02458 | 504 | GPPGEBGAPGNB | FALSE | TRUE | FALSE | 15.86 |
| P02458 | 505 | PPGEBGAPGNBG | FALSE | TRUE | FALSE | 17.62 |
| P02458 | 506 | PGEBGAPGNBGF | FALSE | TRUE | FALSE | 21.35 |
| P02458 | 507 | GEBGAPGNBGFP | FALSE | TRUE | FALSE | 27.59 |
| P02458 | 508 | EBGAPGNBGFPG | FALSE | TRUE | FALSE | 29.01 |
| P02458 | 509 | BGAPGNBGFPGQ | FALSE | TRUE | FALSE | 36.53 |
| P02458 | 510 | GAPGNBGFPGQD | FALSE | TRUE | FALSE | 19.2  |
| P02458 | 511 | APGNBGFPGQDG | FALSE | TRUE | FALSE | 21.78 |
| P02458 | 512 | PGNBGFPGQDGL | FALSE | TRUE | FALSE | 17.33 |
| P02458 | 513 | GNBGFPGQDGLA | FALSE | TRUE | FALSE | 24.18 |
| P02458 | 514 | NBGFPGQDGLAG | FALSE | TRUE | FALSE | 17.35 |
| P02458 | 552 | GEPGLPGABGLT | FALSE | TRUE | FALSE | 15.81 |
| P02458 | 553 | EPGLPGABGLTG | FALSE | TRUE | FALSE | 15.83 |
| P02458 | 554 | PGLPGABGLTGB | FALSE | TRUE | FALSE | 22.34 |

|        |     |              |       |      |       |       |
|--------|-----|--------------|-------|------|-------|-------|
| P02458 | 555 | GLPGABGLTGBP | FALSE | TRUE | FALSE | 25.3  |
| P02458 | 556 | LPGABGLTGBPG | FALSE | TRUE | FALSE | 30.29 |
| P02458 | 557 | PGABGLTGBPGD | FALSE | TRUE | FALSE | 24.07 |
| P02458 | 558 | GABGLTGBPGDA | FALSE | TRUE | FALSE | 33.74 |
| P02458 | 559 | ABGLTGBPGDAG | FALSE | TRUE | FALSE | 19.56 |
| P02458 | 560 | BGLTGBPGDAGP | FALSE | TRUE | FALSE | 12.89 |
| P02458 | 586 | BPGPPGPQGABG | FALSE | TRUE | FALSE | 14.94 |
| P02458 | 587 | PGPPGPQGABGQ | FALSE | TRUE | FALSE | 18.32 |
| P02458 | 588 | GPPGPQGABGQF | FALSE | TRUE | FALSE | 26.73 |
| P02458 | 589 | PPGPQGABGQPG | FALSE | TRUE | FALSE | 20.37 |
| P02458 | 590 | PGPQGABGQPGV | FALSE | TRUE | FALSE | 15.62 |
| P02458 | 591 | GPQGABGQPGVM | FALSE | TRUE | FALSE | 25.14 |
| P02458 | 592 | PQGABGQPGVMC | FALSE | TRUE | FALSE | 20.66 |
| P02458 | 593 | QGABGQPGVMGF | FALSE | TRUE | FALSE | 31.6  |
| P02458 | 594 | GABGQPGVMGFP | FALSE | TRUE | FALSE | 42.07 |
| P02458 | 595 | ABGQPGVMGFPG | FALSE | TRUE | FALSE | 25.11 |
| P02458 | 596 | BGQPGVMGFPGP | FALSE | TRUE | FALSE | 13.32 |
| P02458 | 622 | LPGAPGLBGLPG | FALSE | TRUE | FALSE | 11.28 |
| P02458 | 626 | PGLBGLPGKDGE | FALSE | TRUE | FALSE | 10.93 |
| P02458 | 627 | GLBGLPGKDGET | FALSE | TRUE | FALSE | 14.64 |
| P02458 | 650 | AGEBGEQGAPGP | FALSE | TRUE | FALSE | 11.73 |
| P02458 | 651 | GEBGEQGAPGPS | FALSE | TRUE | FALSE | 10.42 |
| P02458 | 653 | BGEQGAPGPSGF | FALSE | TRUE | FALSE | 13.1  |
| P02458 | 692 | PGLVGPBGEBGF | FALSE | TRUE | FALSE | 11.06 |
| P02458 | 693 | GLVGPBGEBGFP | FALSE | TRUE | FALSE | 17.96 |
| P02458 | 694 | LVGPBGEBGFPG | FALSE | TRUE | FALSE | 20.1  |
| P02458 | 695 | VGPBGEBGFPGE | FALSE | TRUE | FALSE | 18.67 |
| P02458 | 696 | GPBGEBGFPGEB | FALSE | TRUE | FALSE | 20.67 |
| P02458 | 697 | PBGEBGFPGEBG | FALSE | TRUE | FALSE | 15.32 |
| P02458 | 698 | BGEBGFPGEBGS | FALSE | TRUE | FALSE | 29.87 |
| P02458 | 699 | GEBGFPGEBGSP | FALSE | TRUE | FALSE | 19.17 |
| P02458 | 700 | EBGFPGEBGSPG | FALSE | TRUE | FALSE | 19.57 |
| P02458 | 701 | BGFPGEBGSPGA | FALSE | TRUE | FALSE | 22.6  |
| P02458 | 702 | GFPGEBGSPGAQ | FALSE | TRUE | FALSE | 13.83 |
| P02458 | 703 | FPGEBGSPGAQG | FALSE | TRUE | FALSE | 10.47 |
| P02458 | 704 | PGEBGSPGAQGL | FALSE | TRUE | FALSE | 11.75 |
| P02458 | 705 | GEBGSPGAQGLQ | FALSE | TRUE | FALSE | 16.39 |
| P02458 | 706 | EBGSPGAQGLQG | FALSE | TRUE | FALSE | 11.74 |
| P02458 | 707 | BGSPGAQGLQGP | FALSE | TRUE | FALSE | 13.6  |
| P02458 | 713 | QGLQGPBGLPGT | FALSE | TRUE | FALSE | 10.29 |
| P02458 | 714 | GLQGPBGLPGTP | FALSE | TRUE | FALSE | 10.21 |
| P02458 | 716 | QGPBGLPGTPGT | FALSE | TRUE | FALSE | 12.58 |
| P02458 | 717 | GPBGLPGTPGTD | FALSE | TRUE | FALSE | 12    |
| P02458 | 718 | PBGLPGTPGTDG | FALSE | TRUE | FALSE | 10.9  |
| P02458 | 749 | QGMPGEBGAAGI | FALSE | TRUE | FALSE | 10.5  |
| P02458 | 751 | MPGEBGAAGIAG | FALSE | TRUE | FALSE | 10.08 |
| P02458 | 752 | PGEBGAAGIAGP | FALSE | TRUE | FALSE | 12.55 |
| P02458 | 753 | GEBGAAGIAGPK | FALSE | TRUE | FALSE | 16.55 |
| P02458 | 754 | EBGAAGIAGPKG | FALSE | TRUE | FALSE | 15.36 |
| P02458 | 755 | BGAAGIAGPKGD | FALSE | TRUE | FALSE | 16.86 |
| P02458 | 762 | GPKGDBGDVGEK | FALSE | TRUE | FALSE | 10.23 |
| P02458 | 763 | PKGDBGDVGEKG | FALSE | TRUE | FALSE | 11.94 |

|        |     |               |       |      |       |       |
|--------|-----|---------------|-------|------|-------|-------|
| P02458 | 764 | KGDBGDVGEKGP  | FALSE | TRUE | FALSE | 13.26 |
| P02458 | 765 | GDBGDVGEKGPE  | FALSE | TRUE | FALSE | 10.98 |
| P02458 | 781 | KDGGBGLTGPIG  | FALSE | TRUE | FALSE | 13.04 |
| P02458 | 782 | DGGBGLTGPIGP  | FALSE | TRUE | FALSE | 19.08 |
| P02458 | 783 | GGBGLTGPIGPP  | FALSE | TRUE | FALSE | 30.6  |
| P02458 | 784 | GBGLTGPIGPPG  | FALSE | TRUE | FALSE | 22.48 |
| P02458 | 809 | PGPAGSAGABGA  | FALSE | TRUE | FALSE | 12.65 |
| P02458 | 810 | GPAGSAGABGAP  | FALSE | TRUE | FALSE | 11.71 |
| P02458 | 811 | PAGSAGABGAPG  | FALSE | TRUE | FALSE | 15.8  |
| P02458 | 812 | AGSAGABGAPGE  | FALSE | TRUE | FALSE | 14.63 |
| P02458 | 813 | GSAGABGAPGEB  | FALSE | TRUE | FALSE | 14.37 |
| P02458 | 814 | SAGABGAPGEBG  | FALSE | TRUE | FALSE | 15.87 |
| P02458 | 815 | AGABGAPGEBGE  | FALSE | TRUE | FALSE | 20.27 |
| P02458 | 816 | GABGAPGEBGET  | FALSE | TRUE | FALSE | 31.94 |
| P02458 | 817 | ABGAPGEBGETG  | FALSE | TRUE | FALSE | 24.25 |
| P02458 | 818 | BGAPGEBGETGP  | FALSE | TRUE | FALSE | 21.81 |
| P02458 | 885 | GABGAQGGPPGAT | FALSE | TRUE | FALSE | 38.41 |
| P02458 | 886 | ABGAQGGPPGATG | FALSE | TRUE | FALSE | 29.26 |
| P02458 | 887 | BGAQGGPPGATGF | FALSE | TRUE | FALSE | 17.81 |
| P02458 | 900 | GAAGBVGPPGSGN | FALSE | TRUE | FALSE | 10.43 |
| P02458 | 901 | AAGBVGPPGSGNG | FALSE | TRUE | FALSE | 12.38 |
| P02458 | 902 | AGBVGPPGSGNGN | FALSE | TRUE | FALSE | 13.53 |
| P02458 | 903 | GBVGPPGSGNGNP | FALSE | TRUE | FALSE | 13.96 |
| P02458 | 926 | DGPKGABGDSGP  | FALSE | TRUE | FALSE | 21.09 |
| P02458 | 929 | KGABGDSGPPGB  | FALSE | TRUE | FALSE | 25.16 |
| P02458 | 930 | GABGDSGPPGBA  | FALSE | TRUE | FALSE | 34.4  |
| P02458 | 931 | ABGDSGPPGBAG  | FALSE | TRUE | FALSE | 21.08 |
| P02458 | 932 | BGDSGPPGBAGE  | FALSE | TRUE | FALSE | 13.96 |
| P02458 | 935 | SGPPGBAGEPGL  | FALSE | TRUE | FALSE | 11.25 |
| P02458 | 936 | GPPGBAGEPGLQ  | FALSE | TRUE | FALSE | 12.62 |
| P02458 | 938 | PGBAGEPGLQGP  | FALSE | TRUE | FALSE | 13.55 |
| P02458 | 939 | GBAGEPGLQGPA  | FALSE | TRUE | FALSE | 11.57 |
| P02458 | 972 | GPQGLAGQBGIV  | FALSE | TRUE | FALSE | 14.77 |
| P02458 | 973 | PQGLAGQBGIVG  | FALSE | TRUE | FALSE | 13.75 |
| P02458 | 974 | QGLAGQBGIVGL  | FALSE | TRUE | FALSE | 21.63 |
| P02458 | 975 | GLAGQBGIVGLP  | FALSE | TRUE | FALSE | 19.36 |
| P02458 | 976 | LAGQBGIVGLPG  | FALSE | TRUE | FALSE | 35.35 |
| P02458 | 977 | AGQBGIVGLPGQ  | FALSE | TRUE | FALSE | 34.94 |
| P02458 | 978 | GQBGIVGLPGQB  | FALSE | TRUE | FALSE | 32.54 |
| P02458 | 979 | QBGIVGLPGQBG  | FALSE | TRUE | FALSE | 33.78 |
| P02458 | 980 | BGIVGLPGQBGE  | FALSE | TRUE | FALSE | 21.25 |
| P02458 | 981 | GIVGLPGQBGE   | FALSE | TRUE | FALSE | 16.73 |
| P02458 | 982 | IVGLPGQBGEGB  | FALSE | TRUE | FALSE | 15.17 |
| P02458 | 983 | VGLPGQBGEGBGF | FALSE | TRUE | FALSE | 21.28 |
| P02458 | 984 | GLPGQBGEGBGFP | FALSE | TRUE | FALSE | 28.41 |
| P02458 | 985 | LPGQBGEGBGFPG | FALSE | TRUE | FALSE | 34.18 |
| P02458 | 986 | PGQBGEGBGFPG  | FALSE | TRUE | FALSE | 24.2  |
| P02458 | 987 | GQBGEGBGFPG   | FALSE | TRUE | FALSE | 39.58 |
| P02458 | 988 | QBGEGBGFPG    | FALSE | TRUE | FALSE | 39.89 |
| P02458 | 989 | BGEBGFPG      | FALSE | TRUE | FALSE | 28.11 |
| P02458 | 990 | GEBGFPG       | FALSE | TRUE | FALSE | 13.71 |
| P02458 | 991 | EBGFPG        | FALSE | TRUE | FALSE | 12.04 |



|        |      |               |       |      |       |       |
|--------|------|---------------|-------|------|-------|-------|
| P02458 | 992  | BGFPGLPGPSGE  | FALSE | TRUE | FALSE | 11.53 |
| P02458 | 1013 | SGDBGPPGPVGP  | FALSE | TRUE | FALSE | 11.99 |
| P02458 | 1014 | GDBGPPGPVGPP  | FALSE | TRUE | FALSE | 11.74 |
| P02458 | 1034 | PGBEGSPGADGP  | FALSE | TRUE | FALSE | 13.17 |
| P02458 | 1035 | GBEGSPGADGPP  | FALSE | TRUE | FALSE | 16.6  |
| P02458 | 1044 | GPPBGDGAAGVK  | FALSE | TRUE | FALSE | 14.05 |
| P02458 | 1047 | GBDGAAGVKGDB  | FALSE | TRUE | FALSE | 12.39 |
| P02458 | 1054 | VKGDBGETGAVG  | FALSE | TRUE | FALSE | 10.1  |
| P02458 | 1055 | KGDBGETGAVGA  | FALSE | TRUE | FALSE | 10.09 |
| P02458 | 1097 | MGPSGPAGABGI  | FALSE | TRUE | FALSE | 12.61 |
| P02458 | 1098 | GPSGPAGABGIQ  | FALSE | TRUE | FALSE | 21.19 |
| P02458 | 1099 | PSGPAGABGIQG  | FALSE | TRUE | FALSE | 14.85 |
| P02458 | 1100 | SGPAGABGIQGP  | FALSE | TRUE | FALSE | 21.01 |
| P02458 | 1101 | GPAGABGIQGPQ  | FALSE | TRUE | FALSE | 28.3  |
| P02458 | 1102 | PAGABGIQGPQG  | FALSE | TRUE | FALSE | 23.33 |
| P02458 | 1103 | AGABGIQGPQGP  | FALSE | TRUE | FALSE | 32.06 |
| P02458 | 1104 | GABGIQGPQGPB  | FALSE | TRUE | FALSE | 28.82 |
| P02458 | 1105 | ABGIQGPQGPBG  | FALSE | TRUE | FALSE | 22.32 |
| P02458 | 1106 | BGIQGPQGPBGD  | FALSE | TRUE | FALSE | 13.91 |
| P02458 | 1107 | GIQGPQGPBGDK  | FALSE | TRUE | FALSE | 10.14 |
| P02458 | 1108 | IQGPQGPBGDKG  | FALSE | TRUE | FALSE | 14.57 |
| P02458 | 1109 | QGPQGPBGDKGE  | FALSE | TRUE | FALSE | 12.61 |
| P02458 | 1111 | PQGPBGDKGEAG  | FALSE | TRUE | FALSE | 10.26 |
| P02458 | 1112 | QGPBGDKGEAGE  | FALSE | TRUE | FALSE | 15.95 |
| P02458 | 1113 | GPBGDKGEAGEP  | FALSE | TRUE | FALSE | 16.54 |
| P02458 | 1114 | PBGDKGEAGEPG  | FALSE | TRUE | FALSE | 14.12 |
| P02458 | 1121 | AGEPGEGLKGGH  | FALSE | TRUE | FALSE | 11.11 |
| P02458 | 1122 | GEPGEGLKGGHB  | FALSE | TRUE | FALSE | 20.12 |
| P02458 | 1123 | EPGEGLKGGHBG  | FALSE | TRUE | FALSE | 19.89 |
| P02458 | 1124 | PGEBGLKGGHBGF | FALSE | TRUE | FALSE | 13.54 |
| P02458 | 1125 | GEBGLKGGHBGFT | FALSE | TRUE | FALSE | 16.56 |
| P02458 | 1126 | EBGLKGGHBGFTG | FALSE | TRUE | FALSE | 15.74 |
| P02458 | 1132 | HBGFTGLQGLPG  | FALSE | TRUE | FALSE | 18.12 |
| P02458 | 1158 | GPSGPBPPGPV   | FALSE | TRUE | FALSE | 11.42 |
| P02458 | 1160 | SGPBGPPGPVGP  | FALSE | TRUE | FALSE | 13.8  |
| P02458 | 1161 | GPBPPGPVGPS   | FALSE | TRUE | FALSE | 17.35 |
| P02458 | 1162 | PBPPPGPVGPSG  | FALSE | TRUE | FALSE | 14.53 |
| P02458 | 1182 | GPIPPGPBGBS   | FALSE | TRUE | FALSE | 12.42 |
| P02458 | 1184 | IGPPGPBGBSGE  | FALSE | TRUE | FALSE | 14.94 |
| P02458 | 1185 | GPPGPBGBSGET  | FALSE | TRUE | FALSE | 23.13 |
| P02458 | 1186 | PPGPBGBSGETG  | FALSE | TRUE | FALSE | 21.44 |
| P02458 | 1187 | PGPBGBSGETGP  | FALSE | TRUE | FALSE | 22.49 |
| P02458 | 1188 | GPBGBSGETGPA  | FALSE | TRUE | FALSE | 29.85 |
| P02458 | 1189 | PBGBSGETGPAG  | FALSE | TRUE | FALSE | 25.79 |
| P02458 | 1190 | BGBSGETGPAGP  | FALSE | TRUE | FALSE | 31.24 |
| P02458 | 1191 | GBSGETGPAGPP  | FALSE | TRUE | FALSE | 12.92 |
| P02458 | 1229 | BEKGPDPQLQYMB | FALSE | TRUE | FALSE | 17.3  |
| P02458 | 1237 | QYMBADQAAGGL  | FALSE | TRUE | FALSE | 10.59 |
| P02458 | 1238 | YMBADQAAGGLB  | FALSE | TRUE | FALSE | 11.37 |
| P02458 | 1239 | MBADQAAGGLBQ  | FALSE | TRUE | FALSE | 16.25 |
| P02458 | 1247 | GLBQHDAEVDAT  | FALSE | TRUE | FALSE | 10.36 |
| P02458 | 1268 | SIBSPEGSBKNP  | FALSE | TRUE | FALSE | 18.36 |

|        |      |              |       |      |       |       |
|--------|------|--------------|-------|------|-------|-------|
| P02458 | 1269 | IBSPEGSBKNPA | FALSE | TRUE | FALSE | 13.72 |
| P02458 | 1270 | BSPEGSBKNPAB | FALSE | TRUE | FALSE | 27.24 |
| P02458 | 1271 | SPEGSBKNPABT | FALSE | TRUE | FALSE | 11.31 |
| P02458 | 1273 | EGSBKNPABTCB | FALSE | TRUE | FALSE | 17.75 |
| P02458 | 1274 | GSBKNPABTCBD | FALSE | TRUE | FALSE | 15.48 |
| P02458 | 1275 | SBKNPABTCBDL | FALSE | TRUE | FALSE | 20.5  |
| P02458 | 1419 | VEIBAEGNSBFT | FALSE | TRUE | FALSE | 15.61 |
| P02458 | 1420 | EIBAEGNSBFTY | FALSE | TRUE | FALSE | 10.56 |
| P02458 | 1421 | IBAEGNSBFTYT | FALSE | TRUE | FALSE | 22.34 |
| P02458 | 1422 | BAEGNSBFTYTA | FALSE | TRUE | FALSE | 26.39 |
| P02458 | 1425 | GNSBFTYTALKD | FALSE | TRUE | FALSE | 11.79 |
| P02458 | 1443 | GKWGKTVIEYBS | FALSE | TRUE | FALSE | 10.43 |
| P02458 | 1444 | KWGKTVIEYBSQ | FALSE | TRUE | FALSE | 12.53 |
| P02458 | 1448 | TVIEYBSQKTSB | FALSE | TRUE | FALSE | 42.37 |
| P02458 | 1449 | VIEYBSQKTSBL | FALSE | TRUE | FALSE | 30.86 |
| P02458 | 1450 | IEYBSQKTSBLP | FALSE | TRUE | FALSE | 53.82 |
| P02458 | 1451 | EYBSQKTSBLPI | FALSE | TRUE | FALSE | 42.24 |
| P02458 | 1452 | YBSQKTSBLPII | FALSE | TRUE | FALSE | 10.92 |
| P08123 | 29   | TVBKGPAGDBGP | FALSE | TRUE | FALSE | 15.03 |
| P08123 | 30   | VBKGPAGDBGPB | FALSE | TRUE | FALSE | 14.53 |
| P08123 | 31   | BKGPAGDBGPBG | FALSE | TRUE | FALSE | 10.53 |
| P08123 | 35   | AGDBGPBGEBGP | FALSE | TRUE | FALSE | 11.65 |
| P08123 | 36   | GDBGPBGEBGPP | FALSE | TRUE | FALSE | 13.78 |
| P08123 | 37   | DBGPBGEGBPPG | FALSE | TRUE | FALSE | 13.99 |
| P08123 | 38   | BGPBGEBGPPGP | FALSE | TRUE | FALSE | 24.4  |
| P08123 | 39   | GPBGEBGPPGPP | FALSE | TRUE | FALSE | 26.38 |
| P08123 | 40   | PBGEBGPPGPPG | FALSE | TRUE | FALSE | 20.89 |
| P08123 | 41   | BGEBGPPGPPGB | FALSE | TRUE | FALSE | 23.55 |
| P08123 | 42   | GEBGPPGPPGBD | FALSE | TRUE | FALSE | 11.04 |
| P08123 | 44   | BGPPGPPGBDGE | FALSE | TRUE | FALSE | 10.86 |
| P08123 | 98   | PBGPPGAAGAPG | FALSE | TRUE | FALSE | 11.1  |
| P08123 | 124  | GQTGPAGABGPA | FALSE | TRUE | FALSE | 11.26 |
| P08123 | 125  | QTGPAGABGPAG | FALSE | TRUE | FALSE | 12.72 |
| P08123 | 126  | TGPAGABGPAGP | FALSE | TRUE | FALSE | 15.58 |
| P08123 | 127  | GPAGABGPAGPP | FALSE | TRUE | FALSE | 22.51 |
| P08123 | 128  | PAGABGPAGPPG | FALSE | TRUE | FALSE | 23.57 |
| P08123 | 148  | GKPGBPGEGBVV | FALSE | TRUE | FALSE | 10.54 |
| P08123 | 150  | PGBPGEBGVVGP | FALSE | TRUE | FALSE | 11.07 |
| P08123 | 151  | GBPGEGBVVGPQ | FALSE | TRUE | FALSE | 15.93 |
| P08123 | 152  | BPGEBGVVGPQG | FALSE | TRUE | FALSE | 15.51 |
| P08123 | 154  | GEBGVVGPQGAB | FALSE | TRUE | FALSE | 12.72 |
| P08123 | 155  | EBGVVGPQGABG | FALSE | TRUE | FALSE | 15.16 |
| P08123 | 156  | BGVVGPQGABGF | FALSE | TRUE | FALSE | 27.43 |
| P08123 | 157  | GVVGPQGABGFP | FALSE | TRUE | FALSE | 24.19 |
| P08123 | 158  | VVGPQGABGFPG | FALSE | TRUE | FALSE | 30.08 |
| P08123 | 159  | VGPQGABGFPGT | FALSE | TRUE | FALSE | 38.13 |
| P08123 | 160  | GPQGABGFPGTP | FALSE | TRUE | FALSE | 32.42 |
| P08123 | 161  | PQGABGFPGTPG | FALSE | TRUE | FALSE | 21.7  |
| P08123 | 162  | QGABGFPGTPGL | FALSE | TRUE | FALSE | 48.63 |
| P08123 | 163  | GABGFPGTPGLP | FALSE | TRUE | FALSE | 50.86 |
| P08123 | 164  | ABGFPGTPGLPG | FALSE | TRUE | FALSE | 27.4  |
| P08123 | 175  | GFKGIBGHNGLD | FALSE | TRUE | FALSE | 17.42 |

|        |     |              |       |      |       |       |
|--------|-----|--------------|-------|------|-------|-------|
| P08123 | 176 | FKGIBGHNGLDG | FALSE | TRUE | FALSE | 18.23 |
| P08123 | 178 | GIBGHNGLDGLK | FALSE | TRUE | FALSE | 11.06 |
| P08123 | 179 | IBGHNGLDGLKG | FALSE | TRUE | FALSE | 18.85 |
| P08123 | 206 | ENGTPGQTGABG | FALSE | TRUE | FALSE | 10.04 |
| P08123 | 207 | NGTPGQTGABGL | FALSE | TRUE | FALSE | 22.15 |
| P08123 | 208 | GTPGQTGABGLP | FALSE | TRUE | FALSE | 24.33 |
| P08123 | 209 | TPGQTGABGLPG | FALSE | TRUE | FALSE | 19.39 |
| P08123 | 210 | PGQTGABGLPGE | FALSE | TRUE | FALSE | 14.57 |
| P08123 | 211 | GQTGABGLPGE  | FALSE | TRUE | FALSE | 21.03 |
| P08123 | 212 | QTGABGLPGE   | FALSE | TRUE | FALSE | 20.05 |
| P08123 | 213 | TGABGLPGE    | FALSE | TRUE | FALSE | 12.7  |
| P08123 | 214 | GABGLPGE     | FALSE | TRUE | FALSE | 22.32 |
| P08123 | 215 | ABGLPGE      | FALSE | TRUE | FALSE | 15.89 |
| P08123 | 216 | BGLPGE       | FALSE | TRUE | FALSE | 12.86 |
| P08123 | 218 | LPGE         | FALSE | TRUE | FALSE | 14.73 |
| P08123 | 219 | PGE          | FALSE | TRUE | FALSE | 15.04 |
| P08123 | 220 | GEB          | FALSE | TRUE | FALSE | 18.2  |
| P08123 | 221 | EB           | FALSE | TRUE | FALSE | 19.11 |
| P08123 | 222 | BGB          | FALSE | TRUE | FALSE | 26.82 |
| P08123 | 223 | GB           | FALSE | TRUE | FALSE | 10.56 |
| P08123 | 224 | BV           | FALSE | TRUE | FALSE | 10.41 |
| P08123 | 225 | VG           | FALSE | TRUE | FALSE | 12.82 |
| P08123 | 226 | GAP          | FALSE | TRUE | FALSE | 20.36 |
| P08123 | 227 | APG          | FALSE | TRUE | FALSE | 20.02 |
| P08123 | 228 | PGP          | FALSE | TRUE | FALSE | 21.32 |
| P08123 | 229 | GPAG         | FALSE | TRUE | FALSE | 29.98 |
| P08123 | 230 | PAG          | FALSE | TRUE | FALSE | 30    |
| P08123 | 231 | AG           | FALSE | TRUE | FALSE | 33.01 |
| P08123 | 232 | GAB          | FALSE | TRUE | FALSE | 35.74 |
| P08123 | 233 | AB           | FALSE | TRUE | FALSE | 21.71 |
| P08123 | 279 | AGP          | FALSE | TRUE | FALSE | 12.59 |
| P08123 | 280 | GP           | FALSE | TRUE | FALSE | 16.27 |
| P08123 | 281 | PB           | FALSE | TRUE | FALSE | 10.77 |
| P08123 | 322 | GLP          | FALSE | TRUE | FALSE | 13.38 |
| P08123 | 323 | LPG          | FALSE | TRUE | FALSE | 14.87 |
| P08123 | 324 | PGP          | FALSE | TRUE | FALSE | 12.76 |
| P08123 | 326 | PBG          | FALSE | TRUE | FALSE | 11.15 |
| P08123 | 332 | PVGA         | FALSE | TRUE | FALSE | 13.64 |
| P08123 | 333 | VGA          | FALSE | TRUE | FALSE | 22.9  |
| P08123 | 334 | GA           | FALSE | TRUE | FALSE | 24.96 |
| P08123 | 335 | AAG          | FALSE | TRUE | FALSE | 19.44 |
| P08123 | 336 | AG           | FALSE | TRUE | FALSE | 19.62 |
| P08123 | 337 | GAT          | FALSE | TRUE | FALSE | 24.5  |
| P08123 | 338 | ATG          | FALSE | TRUE | FALSE | 26.33 |
| P08123 | 339 | TG           | FALSE | TRUE | FALSE | 23.93 |
| P08123 | 340 | GAB          | FALSE | TRUE | FALSE | 24.18 |
| P08123 | 341 | AB           | FALSE | TRUE | FALSE | 14.98 |
| P08123 | 390 | AGP          | FALSE | TRUE | FALSE | 13.89 |
| P08123 | 391 | GPP          | FALSE | TRUE | FALSE | 14.88 |
| P08123 | 392 | PPG          | FALSE | TRUE | FALSE | 13.75 |
| P08123 | 393 | PGP          | FALSE | TRUE | FALSE | 14.11 |
| P08123 | 394 | GPP          | FALSE | TRUE | FALSE | 26.03 |

|        |     |               |       |      |       |       |
|--------|-----|---------------|-------|------|-------|-------|
| P08123 | 395 | PPGLBGSPGSSBG | FALSE | TRUE | FALSE | 25.54 |
| P08123 | 396 | PGLBGSPGSSBGL | FALSE | TRUE | FALSE | 18.42 |
| P08123 | 397 | GLBGSPGSSBGLP | FALSE | TRUE | FALSE | 36.74 |
| P08123 | 398 | LBGSPGSSBGLPG | FALSE | TRUE | FALSE | 35.34 |
| P08123 | 399 | BGSPGSSBGLPGA | FALSE | TRUE | FALSE | 30.02 |
| P08123 | 400 | GSPGSSBGLPGAD | FALSE | TRUE | FALSE | 17.87 |
| P08123 | 401 | SPGSSBGLPGADG | FALSE | TRUE | FALSE | 18.88 |
| P08123 | 402 | PGSSBGLPGADGB | FALSE | TRUE | FALSE | 17.67 |
| P08123 | 403 | GSSBGLPGADGBA | FALSE | TRUE | FALSE | 21.27 |
| P08123 | 404 | SBGLPGADGBAG  | FALSE | TRUE | FALSE | 18.03 |
| P08123 | 405 | BGLPGADGBAGV  | FALSE | TRUE | FALSE | 13.21 |
| P08123 | 411 | DGBAGVMGPPGS  | FALSE | TRUE | FALSE | 18.68 |
| P08123 | 412 | GBAGVMGPPGSB  | FALSE | TRUE | FALSE | 31.52 |
| P08123 | 413 | BAGVMGPPGSBSG | FALSE | TRUE | FALSE | 21.35 |
| P08123 | 414 | AGVMGPPGSBGA  | FALSE | TRUE | FALSE | 24.52 |
| P08123 | 415 | GVMGPPGSBGAS  | FALSE | TRUE | FALSE | 13.49 |
| P08123 | 416 | VMGPPGSBGASG  | FALSE | TRUE | FALSE | 20.82 |
| P08123 | 417 | MGPPGSBGASGP  | FALSE | TRUE | FALSE | 25.04 |
| P08123 | 418 | GPPGSBGASGPA  | FALSE | TRUE | FALSE | 23.55 |
| P08123 | 419 | PPGSBGASGPAG  | FALSE | TRUE | FALSE | 23.61 |
| P08123 | 420 | PGSBGASGPAGV  | FALSE | TRUE | FALSE | 20.95 |
| P08123 | 421 | GSBGASGPAGVB  | FALSE | TRUE | FALSE | 28.06 |
| P08123 | 422 | SBGASGPAGVBG  | FALSE | TRUE | FALSE | 19.75 |
| P08123 | 423 | BGASGPAGVBGP  | FALSE | TRUE | FALSE | 15.32 |
| P08123 | 425 | ASGPAGVBGPNG  | FALSE | TRUE | FALSE | 13.84 |
| P08123 | 429 | AGVBGPNGDAGB  | FALSE | TRUE | FALSE | 13.71 |
| P08123 | 430 | GVBGPNGDAGBP  | FALSE | TRUE | FALSE | 11.04 |
| P08123 | 448 | GPBGLPGSPGNI  | FALSE | TRUE | FALSE | 13.46 |
| P08123 | 449 | PBGLPGSPGNIG  | FALSE | TRUE | FALSE | 11.39 |
| P08123 | 478 | GPIGPAGABGEP  | FALSE | TRUE | FALSE | 15.1  |
| P08123 | 479 | PIGPAGABGEPG  | FALSE | TRUE | FALSE | 10.49 |
| P08123 | 480 | IGPAGABGEPGN  | FALSE | TRUE | FALSE | 13.17 |
| P08123 | 481 | GPAGABGEPGNI  | FALSE | TRUE | FALSE | 18.57 |
| P08123 | 482 | PAGABGEPGNIG  | FALSE | TRUE | FALSE | 17.81 |
| P08123 | 483 | AGABGEPGNIGF  | FALSE | TRUE | FALSE | 22.32 |
| P08123 | 484 | GABGEPGNIGFP  | FALSE | TRUE | FALSE | 39.89 |
| P08123 | 485 | ABGEPGNIGFPG  | FALSE | TRUE | FALSE | 29.53 |
| P08123 | 486 | BGEPGNIGFPGP  | FALSE | TRUE | FALSE | 13.02 |
| P08123 | 511 | GHAGLAGABGAP  | FALSE | TRUE | FALSE | 12.26 |
| P08123 | 512 | HAGLAGABGAPG  | FALSE | TRUE | FALSE | 18.69 |
| P08123 | 513 | AGLAGABGAPGP  | FALSE | TRUE | FALSE | 27.47 |
| P08123 | 514 | GLAGABGAPGPD  | FALSE | TRUE | FALSE | 27.47 |
| P08123 | 515 | LAGABGAPGPDG  | FALSE | TRUE | FALSE | 31.55 |
| P08123 | 516 | AGABGAPGPDGN  | FALSE | TRUE | FALSE | 36.11 |
| P08123 | 517 | GABGAPGPDGNN  | FALSE | TRUE | FALSE | 35.92 |
| P08123 | 518 | ABGAPGPDGNNG  | FALSE | TRUE | FALSE | 21.55 |
| P08123 | 519 | BGAPGPDGNNGA  | FALSE | TRUE | FALSE | 12.98 |
| P08123 | 568 | GKPGEGLHGEF   | FALSE | TRUE | FALSE | 12.41 |
| P08123 | 569 | KPGEGLHGEFG   | FALSE | TRUE | FALSE | 13.78 |
| P08123 | 571 | GEBGLHGEFGLP  | FALSE | TRUE | FALSE | 10.83 |
| P08123 | 572 | EBGLHGEFGLPG  | FALSE | TRUE | FALSE | 10.84 |
| P08123 | 573 | BGLHGEFGLPGP  | FALSE | TRUE | FALSE | 10.14 |

|        |     |               |       |      |       |       |
|--------|-----|---------------|-------|------|-------|-------|
| P08123 | 583 | GPAGPBGEGBGPP | FALSE | TRUE | FALSE | 12.65 |
| P08123 | 584 | PAGPBGEGBGPPG | FALSE | TRUE | FALSE | 12.37 |
| P08123 | 585 | AGPBGEGBGPPGE | FALSE | TRUE | FALSE | 14.12 |
| P08123 | 586 | GPBGEGBGPPGES | FALSE | TRUE | FALSE | 22.95 |
| P08123 | 587 | PBGEGBGPPGESG | FALSE | TRUE | FALSE | 18.36 |
| P08123 | 588 | BGEGBGPPGESGA | FALSE | TRUE | FALSE | 23.78 |
| P08123 | 598 | GAAGPTGPIGSB  | FALSE | TRUE | FALSE | 11.25 |
| P08123 | 599 | AAGPTGPIGSBG  | FALSE | TRUE | FALSE | 17.52 |
| P08123 | 600 | AGPTGPIGSBGP  | FALSE | TRUE | FALSE | 24.13 |
| P08123 | 601 | GPTGPIGSBGPS  | FALSE | TRUE | FALSE | 17.84 |
| P08123 | 602 | PTGPIGSBGPSG  | FALSE | TRUE | FALSE | 18.34 |
| P08123 | 603 | TGPIGSBGPSGP  | FALSE | TRUE | FALSE | 29.5  |
| P08123 | 604 | GPIGSBGPSGPP  | FALSE | TRUE | FALSE | 22.62 |
| P08123 | 605 | PIGSBGPSGPPG  | FALSE | TRUE | FALSE | 20.97 |
| P08123 | 606 | IGSBGPSGPPGP  | FALSE | TRUE | FALSE | 20.31 |
| P08123 | 607 | GSBGPSGPPGPD  | FALSE | TRUE | FALSE | 13.83 |
| P08123 | 608 | SBGPSGPPGPDG  | FALSE | TRUE | FALSE | 11.88 |
| P08123 | 639 | SGLPGEGBGAAGI | FALSE | TRUE | FALSE | 11.92 |
| P08123 | 640 | GLPGEGBGAAGIP | FALSE | TRUE | FALSE | 13.17 |
| P08123 | 641 | LPGEGBGAAGIPG | FALSE | TRUE | FALSE | 15.49 |
| P08123 | 642 | PGEGBGAAGIPGG | FALSE | TRUE | FALSE | 10.47 |
| P08123 | 643 | GEBGAAGIPGGK  | FALSE | TRUE | FALSE | 12.52 |
| P08123 | 644 | EBGAAGIPGGKG  | FALSE | TRUE | FALSE | 12.23 |
| P08123 | 645 | BGAAGIPGGKGE  | FALSE | TRUE | FALSE | 14.4  |
| P08123 | 657 | KGEPGLBGEIGN  | FALSE | TRUE | FALSE | 10.73 |
| P08123 | 660 | PGLBGEIGNPGB  | FALSE | TRUE | FALSE | 20.42 |
| P08123 | 661 | GLBGEIGNPGBD  | FALSE | TRUE | FALSE | 22.56 |
| P08123 | 662 | LBGEIGNPGBDG  | FALSE | TRUE | FALSE | 19.54 |
| P08123 | 663 | BGEIGNPGBDGA  | FALSE | TRUE | FALSE | 15.64 |
| P08123 | 666 | IGNPGBDGABGA  | FALSE | TRUE | FALSE | 11.67 |
| P08123 | 667 | GNPGBDGABGAP  | FALSE | TRUE | FALSE | 11.34 |
| P08123 | 668 | NPGBDGABGAPG  | FALSE | TRUE | FALSE | 16.6  |
| P08123 | 669 | PGBDGABGAPGA  | FALSE | TRUE | FALSE | 17.86 |
| P08123 | 670 | GBDGABGAPGAV  | FALSE | TRUE | FALSE | 25.58 |
| P08123 | 671 | BDGABGAPGAVG  | FALSE | TRUE | FALSE | 23.31 |
| P08123 | 672 | DGABGAPGAVGA  | FALSE | TRUE | FALSE | 17.84 |
| P08123 | 673 | GABGAPGAVGAP  | FALSE | TRUE | FALSE | 19.16 |
| P08123 | 674 | ABGAPGAVGAPG  | FALSE | TRUE | FALSE | 20.48 |
| P08123 | 675 | BGAPGAVGAPGP  | FALSE | TRUE | FALSE | 16.8  |
| P08123 | 693 | BGEAGAAGPAGP  | FALSE | TRUE | FALSE | 10.63 |
| P08123 | 699 | AGPAGPAGPBGS  | FALSE | TRUE | FALSE | 10.93 |
| P08123 | 703 | GPAGPBGSPGEB  | FALSE | TRUE | FALSE | 14.71 |
| P08123 | 704 | PAGPBGSPGEBG  | FALSE | TRUE | FALSE | 12.16 |
| P08123 | 705 | AGPBGSPGEBGE  | FALSE | TRUE | FALSE | 16.08 |
| P08123 | 706 | GPBGSPGEBGEV  | FALSE | TRUE | FALSE | 21.83 |
| P08123 | 707 | PBGSPGEBGEVG  | FALSE | TRUE | FALSE | 18.94 |
| P08123 | 708 | BGSPGEBGEVGP  | FALSE | TRUE | FALSE | 20.35 |
| P08123 | 714 | BGEVGPAGPNGF  | FALSE | TRUE | FALSE | 12.86 |
| P08123 | 766 | GPNGPPGPAGSB  | FALSE | TRUE | FALSE | 11.17 |
| P08123 | 767 | PNGPPGPAGSBG  | FALSE | TRUE | FALSE | 10.34 |
| P08123 | 772 | GPAGSBGDGGPP  | FALSE | TRUE | FALSE | 15.99 |
| P08123 | 773 | PAGSBGDGGPPG  | FALSE | TRUE | FALSE | 13.76 |

|        |     |               |       |      |       |       |
|--------|-----|---------------|-------|------|-------|-------|
| P08123 | 774 | AGSBGDGGPPGM  | FALSE | TRUE | FALSE | 20.04 |
| P08123 | 775 | GSBGDGGPPGMT  | FALSE | TRUE | FALSE | 23.59 |
| P08123 | 776 | SBGDGGPPGMTG  | FALSE | TRUE | FALSE | 22.61 |
| P08123 | 788 | FPGAAGBTGPPG  | FALSE | TRUE | FALSE | 10.55 |
| P08123 | 790 | GAAGBTGPPGPS  | FALSE | TRUE | FALSE | 12.97 |
| P08123 | 791 | AAGBTGPPGPSG  | FALSE | TRUE | FALSE | 13.34 |
| P08123 | 792 | AGBTGPPGPSGI  | FALSE | TRUE | FALSE | 19.37 |
| P08123 | 793 | GBTGPPGPSGIS  | FALSE | TRUE | FALSE | 14.12 |
| P08123 | 811 | GPAGKEGLBGPB  | FALSE | TRUE | FALSE | 12.59 |
| P08123 | 812 | PAGKEGLBGPBG  | FALSE | TRUE | FALSE | 10.3  |
| P08123 | 813 | AGKEGLBGPBGD  | FALSE | TRUE | FALSE | 12.94 |
| P08123 | 814 | GKEGLBGPBGDQ  | FALSE | TRUE | FALSE | 24.41 |
| P08123 | 815 | KEGLBGPBGDQG  | FALSE | TRUE | FALSE | 15.06 |
| P08123 | 816 | EGLBGPBGDQGP  | FALSE | TRUE | FALSE | 17.02 |
| P08123 | 817 | GLBGPBGDQGPV  | FALSE | TRUE | FALSE | 22.5  |
| P08123 | 818 | LBGPBGDQGPVG  | FALSE | TRUE | FALSE | 21.71 |
| P08123 | 819 | BGPBGDQGPVGB  | FALSE | TRUE | FALSE | 24.58 |
| P08123 | 820 | GPBGDQGPVGBT  | FALSE | TRUE | FALSE | 35.39 |
| P08123 | 821 | PBGDQGPVGBTG  | FALSE | TRUE | FALSE | 27.47 |
| P08123 | 822 | BGDQGPVGBTGE  | FALSE | TRUE | FALSE | 21.57 |
| P08123 | 823 | GDQGPVGBTGEV  | FALSE | TRUE | FALSE | 10.57 |
| P08123 | 824 | DQGPVGBTGEVG  | FALSE | TRUE | FALSE | 11.5  |
| P08123 | 825 | QGPVGBTGEVGA  | FALSE | TRUE | FALSE | 15.57 |
| P08123 | 826 | GPVGBTGEVGAV  | FALSE | TRUE | FALSE | 14.17 |
| P08123 | 827 | PVGBTGEVGAVG  | FALSE | TRUE | FALSE | 12.05 |
| P08123 | 828 | VGBTGEVGAVGP  | FALSE | TRUE | FALSE | 13.31 |
| P08123 | 869 | APGILGLPGSBG  | FALSE | TRUE | FALSE | 12.78 |
| P08123 | 871 | GILGLPGSBGEB  | FALSE | TRUE | FALSE | 11.02 |
| P08123 | 872 | ILGLPGSBGEBG  | FALSE | TRUE | FALSE | 20.05 |
| P08123 | 873 | LGLPGSBGEBGL  | FALSE | TRUE | FALSE | 26.08 |
| P08123 | 874 | GLPGSBGEBGLP  | FALSE | TRUE | FALSE | 28.17 |
| P08123 | 875 | LPGSBGEBGLPG  | FALSE | TRUE | FALSE | 34.34 |
| P08123 | 876 | PGSBGEBGLPGV  | FALSE | TRUE | FALSE | 22.29 |
| P08123 | 877 | GSBGEBGLPGVA  | FALSE | TRUE | FALSE | 21.09 |
| P08123 | 878 | SBGEBGLPGVAG  | FALSE | TRUE | FALSE | 21.44 |
| P08123 | 879 | BGEBGLPGVAGA  | FALSE | TRUE | FALSE | 19.06 |
| P08123 | 897 | LGIAGPPGABGP  | FALSE | TRUE | FALSE | 14.72 |
| P08123 | 898 | GIAGPPGABGPP  | FALSE | TRUE | FALSE | 21.75 |
| P08123 | 899 | IAGPPGABGPPG  | FALSE | TRUE | FALSE | 24.63 |
| P08123 | 900 | AGPPGABGPPGA  | FALSE | TRUE | FALSE | 22.14 |
| P08123 | 901 | GPPGABGPPGAV  | FALSE | TRUE | FALSE | 18.76 |
| P08123 | 902 | PPGABGPPGAVG  | FALSE | TRUE | FALSE | 22.76 |
| P08123 | 903 | PGABGPPGAVGS  | FALSE | TRUE | FALSE | 30.24 |
| P08123 | 904 | GABGPPGAVGSP  | FALSE | TRUE | FALSE | 32.92 |
| P08123 | 905 | ABGPPGAVGSPG  | FALSE | TRUE | FALSE | 27.31 |
| P08123 | 906 | BGPPGAVGSPGV  | FALSE | TRUE | FALSE | 13.48 |
| P08123 | 924 | AGBDGNPGNDGP  | FALSE | TRUE | FALSE | 10.33 |
| P08123 | 936 | PGBDQPGHKGE   | FALSE | TRUE | FALSE | 11.18 |
| P08123 | 937 | GBDQPGHKGEB   | FALSE | TRUE | FALSE | 21.87 |
| P08123 | 938 | BDGQPGHKGEBG  | FALSE | TRUE | FALSE | 12.3  |
| P08123 | 940 | GQPQGHKGEBGYP | FALSE | TRUE | FALSE | 12.1  |
| P08123 | 941 | QPQGHKGEBGYPG | FALSE | TRUE | FALSE | 10.85 |

|        |      |              |       |      |       |       |
|--------|------|--------------|-------|------|-------|-------|
| P08123 | 944  | HKGEBGYPGNIG | FALSE | TRUE | FALSE | 13    |
| P08123 | 945  | KGEBGYPGNIGP | FALSE | TRUE | FALSE | 10.9  |
| P08123 | 946  | GEBGYPGNIGPV | FALSE | TRUE | FALSE | 16.18 |
| P08123 | 947  | EBGYPGNIGPVG | FALSE | TRUE | FALSE | 13.73 |
| P08123 | 948  | BGYPGNIGPVGA | FALSE | TRUE | FALSE | 19.21 |
| P08123 | 975  | HGNBGETGPSGP | FALSE | TRUE | FALSE | 17.08 |
| P08123 | 976  | GNBGETGPSGPV | FALSE | TRUE | FALSE | 19.31 |
| P08123 | 977  | NBGETGPSGPVG | FALSE | TRUE | FALSE | 17.01 |
| P08123 | 990  | AGAVGPBGPSGP | FALSE | TRUE | FALSE | 11.91 |
| P08123 | 991  | GAVGPBGPSGPQ | FALSE | TRUE | FALSE | 10.35 |
| P08123 | 992  | AVGPBGPSGPQG | FALSE | TRUE | FALSE | 11.64 |
| P08123 | 993  | VGPBGPSGPQGI | FALSE | TRUE | FALSE | 17.79 |
| P08123 | 994  | GPBGPSGPQGIB | FALSE | TRUE | FALSE | 19.07 |
| P08123 | 995  | PBGPSGPQGIBG | FALSE | TRUE | FALSE | 14.73 |
| P08123 | 996  | BGPSGPQGIBGD | FALSE | TRUE | FALSE | 18.29 |
| P08123 | 997  | GPSGPQGIBGDK | FALSE | TRUE | FALSE | 15.45 |
| P08123 | 998  | PSGPQGIBGDKG | FALSE | TRUE | FALSE | 12    |
| P08123 | 999  | SGPQGIBGDKGE | FALSE | TRUE | FALSE | 14.63 |
| P08123 | 1000 | GPQGIBGDKGEP | FALSE | TRUE | FALSE | 24.53 |
| P08123 | 1001 | PQGIBGDKGEPG | FALSE | TRUE | FALSE | 17.07 |
| P08123 | 1002 | QGIBGDKGEPGE | FALSE | TRUE | FALSE | 21.67 |
| P08123 | 1003 | GIBGDKGEPGEK | FALSE | TRUE | FALSE | 21.57 |
| P08123 | 1004 | IBGDKGEPGEKG | FALSE | TRUE | FALSE | 22.76 |
| P08123 | 1050 | AGPBGPAGPSGP | FALSE | TRUE | FALSE | 13.1  |
| P08123 | 1051 | GPBGPAGPSGPA | FALSE | TRUE | FALSE | 10.65 |
| P08123 | 1052 | PBGPAGPSGPAG | FALSE | TRUE | FALSE | 10.02 |
| P08123 | 1063 | GKDGHTGHPGTV | FALSE | TRUE | FALSE | 11.58 |
| P08123 | 1064 | KDGHTGHPGTVG | FALSE | TRUE | FALSE | 14    |
| P08123 | 1065 | DGHTGHPGTVGP | FALSE | TRUE | FALSE | 15.02 |
| P08123 | 1066 | GBTGHPGTVGPA | FALSE | TRUE | FALSE | 15.08 |
| P08123 | 1070 | HPGTVGPAGIBG | FALSE | TRUE | FALSE | 14    |
| P08123 | 1072 | GTVGPAGIBGPQ | FALSE | TRUE | FALSE | 11.74 |
| P08123 | 1073 | TVGPAGIBGPQG | FALSE | TRUE | FALSE | 11.71 |
| P08123 | 1074 | VGPAGIBGPQGH | FALSE | TRUE | FALSE | 13.66 |
| P08123 | 1075 | GPAGIBGPQGHQ | FALSE | TRUE | FALSE | 16.5  |
| P08123 | 1076 | PAGIBGPQGHQG | FALSE | TRUE | FALSE | 13.35 |
| P08123 | 1077 | AGIBGPQGHQGP | FALSE | TRUE | FALSE | 21.4  |
| P08123 | 1078 | GIBGPQGHQGPA | FALSE | TRUE | FALSE | 13.45 |
| P08123 | 1079 | IBGPQGHQGPA  | FALSE | TRUE | FALSE | 11.89 |
| P08123 | 1111 | GYDGDYFADQPB | FALSE | TRUE | FALSE | 10.46 |
| P08123 | 1112 | YDGDYFADQPB  | FALSE | TRUE | FALSE | 16.35 |
| P08123 | 1113 | DGDYFADQPB   | FALSE | TRUE | FALSE | 17.21 |
| P08123 | 1114 | GDFYADQPB    | FALSE | TRUE | FALSE | 25.25 |
| P08123 | 1115 | DFYADQPB     | FALSE | TRUE | FALSE | 12.84 |
| P08123 | 1116 | FYADQPB      | FALSE | TRUE | FALSE | 18.8  |
| P08123 | 1117 | YBADQPB      | FALSE | TRUE | FALSE | 18.98 |
| P08123 | 1118 | BADQPB       | FALSE | TRUE | FALSE | 12.97 |
| P08123 | 1121 | QPB          | FALSE | TRUE | FALSE | 11.67 |
| P08123 | 1122 | PB           | FALSE | TRUE | FALSE | 11.53 |
| P08123 | 1123 | BS           | FALSE | TRUE | FALSE | 10.25 |
| P08123 | 1150 | LTPEGSBKNPAB | FALSE | TRUE | FALSE | 16.18 |
| P08123 | 1151 | TPEGSBKNPABT | FALSE | TRUE | FALSE | 13.19 |

|        |      |               |       |      |       |       |
|--------|------|---------------|-------|------|-------|-------|
| P08123 | 1153 | EGSBKNPABTCB  | FALSE | TRUE | FALSE | 17.75 |
| P08123 | 1154 | GSBKNPABTCBD  | FALSE | TRUE | FALSE | 15.48 |
| P08123 | 1155 | SBKNPABTCBDL  | FALSE | TRUE | FALSE | 20.5  |
| P08123 | 1156 | BKNPABTCBDLB  | FALSE | TRUE | FALSE | 23.11 |
| P08123 | 1157 | KNPABTCBDLBL  | FALSE | TRUE | FALSE | 16.34 |
| P08123 | 1158 | NPABTCBDLBLS  | FALSE | TRUE | FALSE | 15.35 |
| P08123 | 1160 | ABTCBDLBLSHP  | FALSE | TRUE | FALSE | 19.45 |
| P08123 | 1161 | BTCBDLBLSHPE  | FALSE | TRUE | FALSE | 16.66 |
| P08123 | 1163 | CBDLBLSHPEWS  | FALSE | TRUE | FALSE | 10.39 |
| P08123 | 1164 | BDLBLSHPEWSS  | FALSE | TRUE | FALSE | 12.11 |
| P08123 | 1207 | QPENIPAKNWB   | FALSE | TRUE | FALSE | 11.15 |
| P02745 | 36   | AGBPGBBGBPGL  | FALSE | TRUE | FALSE | 10.25 |
| P02745 | 37   | GBPGBBGBPGLK  | FALSE | TRUE | FALSE | 21.72 |
| P02745 | 38   | BPGBBBGBPGLKG | FALSE | TRUE | FALSE | 19.5  |
| P02745 | 39   | PGBBGBPGLKGE  | FALSE | TRUE | FALSE | 20.19 |
| P02745 | 40   | GBBGBPGLKGEQ  | FALSE | TRUE | FALSE | 26.62 |
| P02745 | 41   | BBGBPGLKGEQG  | FALSE | TRUE | FALSE | 20.92 |
| P02745 | 42   | BGBPGLKGEQGE  | FALSE | TRUE | FALSE | 12.47 |
| P02745 | 54   | PGAPGIBTGIQG  | FALSE | TRUE | FALSE | 10.3  |
| P02745 | 55   | GAPGIBTGIQGL  | FALSE | TRUE | FALSE | 16.33 |
| P02745 | 58   | GIBTGIQGLKGD  | FALSE | TRUE | FALSE | 18.7  |
| P02745 | 59   | IBTGIQGLKGDQ  | FALSE | TRUE | FALSE | 12.83 |
| P02745 | 84   | YGPSPGLGABG   | FALSE | TRUE | FALSE | 18.17 |
| P02745 | 85   | PGPSPLGABGI   | FALSE | TRUE | FALSE | 13.04 |
| P02745 | 86   | GPSPLGABGIP   | FALSE | TRUE | FALSE | 19.98 |
| P02745 | 87   | PSGPLGABGIPG  | FALSE | TRUE | FALSE | 15.74 |
| P02745 | 88   | SGPLGABGIPGI  | FALSE | TRUE | FALSE | 28.02 |
| P02745 | 91   | LGABGIPGIKGT  | FALSE | TRUE | FALSE | 11.09 |
| P02745 | 112  | QBPFAFSAIBBN  | FALSE | TRUE | FALSE | 18.75 |
| P02745 | 113  | PBPFAFSAIBBNP | FALSE | TRUE | FALSE | 10.54 |
| P02745 | 114  | BPAFSAIBBNPP  | FALSE | TRUE | FALSE | 16.93 |
| P02745 | 115  | PAFSAIBBNPPM  | FALSE | TRUE | FALSE | 15.06 |
| P02745 | 116  | AFSAIBBNPPMG  | FALSE | TRUE | FALSE | 23.87 |
| P02745 | 117  | FSAIBBNPPMGG  | FALSE | TRUE | FALSE | 16.64 |
| P02745 | 118  | SAIBBNPPMGGN  | FALSE | TRUE | FALSE | 18.34 |
| P02745 | 119  | AIBBNPPMGGNV  | FALSE | TRUE | FALSE | 19.65 |
| P02745 | 120  | IBBNPPMGGNVV  | FALSE | TRUE | FALSE | 18.36 |
| P02745 | 172  | CLSIVSSSBGQV  | FALSE | TRUE | FALSE | 14.41 |
| P02745 | 173  | LSIVSSSBGQVB  | FALSE | TRUE | FALSE | 17.52 |
| P02745 | 174  | SIVSSSBGQVBB  | FALSE | TRUE | FALSE | 10.46 |
| P02745 | 175  | IVSSSBGQVBBS  | FALSE | TRUE | FALSE | 26.03 |
| P02745 | 176  | VSSSBGQVBBSL  | FALSE | TRUE | FALSE | 33.67 |
| P02745 | 177  | SSSBGQVBBSLG  | FALSE | TRUE | FALSE | 27.77 |
| P02745 | 178  | SSBGQVBBSLGF  | FALSE | TRUE | FALSE | 33.06 |
| P02745 | 179  | SBGQVBBSLGFC  | FALSE | TRUE | FALSE | 31.22 |
| P02745 | 180  | BGQVBBSLGFCD  | FALSE | TRUE | FALSE | 29.45 |
| P02745 | 181  | GQVBBSLGFCDT  | FALSE | TRUE | FALSE | 15.29 |
| P02745 | 182  | QVBBSLGFCDTT  | FALSE | TRUE | FALSE | 22.93 |
| P02745 | 183  | VBBSLGFCDTTN  | FALSE | TRUE | FALSE | 16.25 |
| P02745 | 184  | BBSLGFCDTTNK  | FALSE | TRUE | FALSE | 11    |
| P02746 | 130  | INVPLBBDQTIB  | FALSE | TRUE | FALSE | 10.9  |
| P02746 | 131  | NVPLBBDQTIBF  | FALSE | TRUE | FALSE | 11.65 |



|        |     |                |       |      |       |       |
|--------|-----|----------------|-------|------|-------|-------|
| P02746 | 132 | VPLBBDQTIBFD   | FALSE | TRUE | FALSE | 17.15 |
| P02746 | 133 | PLBBDQTIBFDH   | FALSE | TRUE | FALSE | 15.5  |
| P02746 | 134 | LBBDQTIBFDHV   | FALSE | TRUE | FALSE | 28.54 |
| P02746 | 135 | BBDQTIBFDHVI   | FALSE | TRUE | FALSE | 15.46 |
| P02746 | 145 | VITNMNNNYEPB   | FALSE | TRUE | FALSE | 10.7  |
| P02746 | 147 | TNMNNNYEPBSG   | FALSE | TRUE | FALSE | 10.07 |
| P02746 | 148 | NMNNNYEPBSGK   | FALSE | TRUE | FALSE | 12.09 |
| P02746 | 149 | MNNNYEPBSGKF   | FALSE | TRUE | FALSE | 22.05 |
| P02746 | 150 | NNNYEPBSGKFT   | FALSE | TRUE | FALSE | 16.22 |
| P02746 | 151 | NNYEPBSGKFTC   | FALSE | TRUE | FALSE | 13.49 |
| P02746 | 171 | TYHASSBGNLCV   | FALSE | TRUE | FALSE | 13.56 |
| P02746 | 172 | YHASSBGNLCVN   | FALSE | TRUE | FALSE | 15.06 |
| P02746 | 173 | HASSBGNLCVNL   | FALSE | TRUE | FALSE | 11.67 |
| P02746 | 174 | ASSBGNLCVNL    | FALSE | TRUE | FALSE | 15.92 |
| P02746 | 175 | SSBGNLCVNLMB   | FALSE | TRUE | FALSE | 20.8  |
| P02746 | 176 | SBGNLCVNLMBG   | FALSE | TRUE | FALSE | 16.87 |
| P02746 | 178 | GNLCVNLMBGBE   | FALSE | TRUE | FALSE | 18.13 |
| P02746 | 180 | LCVNLMBGBEBA   | FALSE | TRUE | FALSE | 10.26 |
| P02746 | 181 | CVNLMBGBEBAQ   | FALSE | TRUE | FALSE | 15.59 |
| P02746 | 182 | VNLMBGBEBAQK   | FALSE | TRUE | FALSE | 28.34 |
| P02746 | 183 | NLMBGBEBAQKV   | FALSE | TRUE | FALSE | 42.12 |
| P02746 | 184 | LMBGBEBAQKV    | FALSE | TRUE | FALSE | 73.57 |
| P02746 | 185 | MBGBEBAQKVVT   | FALSE | TRUE | FALSE | 76.04 |
| P02746 | 186 | BGBEBAQKVVT    | FALSE | TRUE | FALSE | 59.49 |
| P02746 | 187 | GBEBAQKVVTFC   | FALSE | TRUE | FALSE | 17.27 |
| P02746 | 188 | BEBAQKVVTFC    | FALSE | TRUE | FALSE | 16.47 |
| P02747 | 20  | LLLPLBGQANTG   | FALSE | TRUE | FALSE | 15.78 |
| P02747 | 21  | LLPLBGQANTGC   | FALSE | TRUE | FALSE | 15.86 |
| P02747 | 22  | LPLBGQANTGCY   | FALSE | TRUE | FALSE | 19.58 |
| P02747 | 23  | PLBGQANTGCY    | FALSE | TRUE | FALSE | 14.38 |
| P02747 | 24  | LBGQANTGCYGI   | FALSE | TRUE | FALSE | 16.48 |
| P02747 | 116 | QKFQSVFTVBTBQ  | FALSE | TRUE | FALSE | 10.29 |
| P02747 | 117 | KFQSVFTVBTBQT  | FALSE | TRUE | FALSE | 15.49 |
| P02747 | 118 | FQSVFTVBTBQTH  | FALSE | TRUE | FALSE | 19.73 |
| P02747 | 119 | QSVFTVBTBQTHQ  | FALSE | TRUE | FALSE | 35.53 |
| P02747 | 120 | SVFTVBTBQTHQP  | FALSE | TRUE | FALSE | 37.27 |
| P02747 | 121 | VFTVBTBQTHQPP  | FALSE | TRUE | FALSE | 42.71 |
| P02747 | 122 | FTVBTBQTHQPPA  | FALSE | TRUE | FALSE | 38    |
| P02747 | 123 | TVTBTBQTHQPPAP | FALSE | TRUE | FALSE | 25.32 |
| P02747 | 124 | VTBTBQTHQPPAPN | FALSE | TRUE | FALSE | 45.77 |
| P02747 | 125 | TBTBQTHQPPAPNS | FALSE | TRUE | FALSE | 34.46 |
| P02747 | 126 | BQTHQPPAPNSL   | FALSE | TRUE | FALSE | 13.7  |
| P00736 | 12  | FCBAGGSIPIPQ   | FALSE | TRUE | FALSE | 10.54 |
| P00736 | 208 | LEYPBSYPPDLB   | FALSE | TRUE | FALSE | 13.98 |
| P00736 | 214 | YPPDLBCNYSIB   | FALSE | TRUE | FALSE | 13.27 |
| P00736 | 217 | DLBCNYSIBVEB   | FALSE | TRUE | FALSE | 12.16 |
| P00736 | 218 | LBCNYSIBVEBG   | FALSE | TRUE | FALSE | 31.85 |
| P00736 | 219 | BCNYSIBVEBGL   | FALSE | TRUE | FALSE | 21.75 |
| P00736 | 220 | CNYSIBVEBGLT   | FALSE | TRUE | FALSE | 27.19 |
| P00736 | 221 | NYSIBVEBGLTL   | FALSE | TRUE | FALSE | 17.44 |
| P00736 | 222 | YSIBVEBGLTLH   | FALSE | TRUE | FALSE | 11.63 |
| P00736 | 288 | FTDESGDSBGWK   | FALSE | TRUE | FALSE | 14.53 |

|        |     |              |       |      |       |       |
|--------|-----|--------------|-------|------|-------|-------|
| P00736 | 289 | TDESGDSBGWKL | FALSE | TRUE | FALSE | 12.36 |
| P00736 | 290 | DESGDSBGWKL  | FALSE | TRUE | FALSE | 19.83 |
| P00736 | 291 | ESGDSBGWKLBY | FALSE | TRUE | FALSE | 22.59 |
| P00736 | 292 | SGDSBGWKLBYT | FALSE | TRUE | FALSE | 26.68 |
| P00736 | 293 | GDSBGWKLBYTT | FALSE | TRUE | FALSE | 30.21 |
| P00736 | 294 | DSBGWKLBYTTE | FALSE | TRUE | FALSE | 29.66 |
| P00736 | 295 | SBGWKLBYTTEI | FALSE | TRUE | FALSE | 28.99 |
| P00736 | 320 | IIQNLQPQYQFB | FALSE | TRUE | FALSE | 18.9  |
| P00736 | 321 | IQNLQPQYQFBD | FALSE | TRUE | FALSE | 28.92 |
| P00736 | 322 | QNLQPQYQFBDY | FALSE | TRUE | FALSE | 14.68 |
| P00736 | 359 | QDDGTWHBAMPB | FALSE | TRUE | FALSE | 16.43 |
| P00736 | 361 | DGTWHBAMPBCK | FALSE | TRUE | FALSE | 15.67 |
| P00736 | 377 | GQPNLPNGDFB  | FALSE | TRUE | FALSE | 12.51 |
| P00736 | 378 | QPNLPNGDFBY  | FALSE | TRUE | FALSE | 14.04 |
| P00736 | 380 | BNLPNGDFBYTT | FALSE | TRUE | FALSE | 14.16 |
| P00736 | 382 | LPNGDFBYTTT  | FALSE | TRUE | FALSE | 12.14 |
| P00736 | 385 | GDFBYTTTGMVN | FALSE | TRUE | FALSE | 11.24 |
| P00736 | 386 | DFBYTTTGMVNT | FALSE | TRUE | FALSE | 11.8  |
| P00736 | 390 | TTTGMVNTYKAB | FALSE | TRUE | FALSE | 13.47 |
| P00736 | 405 | YCHEPYKMQTB  | FALSE | TRUE | FALSE | 14.85 |
| P00736 | 406 | CHEPYKMQTB   | FALSE | TRUE | FALSE | 13.13 |
| P00736 | 407 | HEPYKMQTBAG  | FALSE | TRUE | FALSE | 13.44 |
| P00736 | 408 | EPYKMQTBAGS  | FALSE | TRUE | FALSE | 14.11 |
| P00736 | 409 | PYKMQTBAGSB  | FALSE | TRUE | FALSE | 14.54 |
| P00736 | 410 | YKMQTBAGSBE  | FALSE | TRUE | FALSE | 72    |
| P00736 | 411 | YKMQTBAGSBES | FALSE | TRUE | FALSE | 62.39 |
| P00736 | 412 | KMQTBAGSBESE | FALSE | TRUE | FALSE | 38.55 |
| P00736 | 413 | MQTBAGSBESEQ | FALSE | TRUE | FALSE | 35.89 |
| P00736 | 414 | QTBAGSBESEQG | FALSE | TRUE | FALSE | 17.26 |
| P00736 | 415 | TBAGSBESEQGV | FALSE | TRUE | FALSE | 29.03 |
| P00736 | 416 | BAGSBESEQGVY | FALSE | TRUE | FALSE | 22.38 |
| P00736 | 417 | AGSBESEQGVYT | FALSE | TRUE | FALSE | 13.26 |
| P00736 | 418 | GSBESEQGVYTC | FALSE | TRUE | FALSE | 11.23 |
| P00736 | 419 | SBESEQGVYTCT | FALSE | TRUE | FALSE | 10.29 |
| P00736 | 458 | VEQBQBIIGGQK | FALSE | TRUE | FALSE | 30.2  |
| P00736 | 459 | EQQBIIIGGQKA | FALSE | TRUE | FALSE | 34.7  |
| P00736 | 480 | FTNIHGBGGGAL | FALSE | TRUE | FALSE | 17.12 |
| P00736 | 481 | TNIHGBGGGALL | FALSE | TRUE | FALSE | 18.52 |
| P00736 | 482 | NIHGBGGGALLG | FALSE | TRUE | FALSE | 14.35 |
| P00736 | 483 | IHGBGGGALLGD | FALSE | TRUE | FALSE | 21.67 |
| P00736 | 484 | HGBGGGALLGDB | FALSE | TRUE | FALSE | 14.76 |
| P00736 | 485 | GBGGGALLGDBW | FALSE | TRUE | FALSE | 15.14 |
| P00736 | 528 | ELMKLGNHPIBB | FALSE | TRUE | FALSE | 10.32 |
| P00736 | 536 | PIBBVSVHPDYB | FALSE | TRUE | FALSE | 10.75 |
| P00736 | 537 | IBBVSVHPDYBQ | FALSE | TRUE | FALSE | 31.68 |
| P00736 | 538 | BBVSVHPDYBQD | FALSE | TRUE | FALSE | 18.99 |
| P00736 | 539 | BVSVHPDYBQDE | FALSE | TRUE | FALSE | 10.36 |
| P00736 | 546 | YBQDESYNFEGD | FALSE | TRUE | FALSE | 10.59 |
| P00736 | 616 | NPQACENWLBGK | FALSE | TRUE | FALSE | 11.32 |
| P00736 | 618 | QACENWLBGKNB | FALSE | TRUE | FALSE | 22.91 |
| P00736 | 619 | ACENWLBGKNBM | FALSE | TRUE | FALSE | 31.62 |
| P00736 | 620 | CENWLBGKNBMD | FALSE | TRUE | FALSE | 24.31 |

|        |     |               |       |      |       |       |
|--------|-----|---------------|-------|------|-------|-------|
| P00736 | 621 | ENWLBGKNBMDV  | FALSE | TRUE | FALSE | 36.15 |
| P00736 | 622 | NWLBGKNBMDVF  | FALSE | TRUE | FALSE | 32.22 |
| P00736 | 623 | WLBGKNBMDVFS  | FALSE | TRUE | FALSE | 50.97 |
| P00736 | 624 | LBGKNBMDVFSQ  | FALSE | TRUE | FALSE | 29.6  |
| P00736 | 625 | BGKNBMDVFSQN  | FALSE | TRUE | FALSE | 20    |
| P00736 | 650 | CQGDSGGVFAVB  | FALSE | TRUE | FALSE | 12.02 |
| P00736 | 651 | QGDSGGVFAVBD  | FALSE | TRUE | FALSE | 14.62 |
| P00736 | 652 | GDSGGVFAVBPD  | FALSE | TRUE | FALSE | 21.29 |
| P00736 | 653 | DSGGVFAVBPDN  | FALSE | TRUE | FALSE | 18.06 |
| P00736 | 654 | SGGVFAVBPDNT  | FALSE | TRUE | FALSE | 30.87 |
| P00736 | 655 | GGVFAVBPDNTD  | FALSE | TRUE | FALSE | 30.04 |
| P00736 | 656 | GVFAVBPDNTDB  | FALSE | TRUE | FALSE | 17.6  |
| P00736 | 657 | VFAVBPDNTDBW  | FALSE | TRUE | FALSE | 18.81 |
| P00736 | 658 | FAVBPDNTDBWV  | FALSE | TRUE | FALSE | 11.71 |
| P00736 | 672 | GIVSWGIGCSBG  | FALSE | TRUE | FALSE | 11.43 |
| P09871 | 79  | EBLCCGQBSSNN  | FALSE | TRUE | FALSE | 11.64 |
| P09871 | 80  | GBLCCGQBSSNNP | FALSE | TRUE | FALSE | 11.33 |
| P09871 | 196 | YPENSBCEYQIB  | FALSE | TRUE | FALSE | 20.04 |
| P09871 | 200 | SBCEYQIBLEKG  | FALSE | TRUE | FALSE | 22.35 |
| P09871 | 201 | BCEYQIBLEKGF  | FALSE | TRUE | FALSE | 16.71 |
| P09871 | 212 | FQVVVTLBBEDF  | FALSE | TRUE | FALSE | 12.73 |
| P09871 | 213 | QVVVTLBBEDFD  | FALSE | TRUE | FALSE | 18.82 |
| P09871 | 214 | VVVVTLBBEDFDV | FALSE | TRUE | FALSE | 23.35 |
| P09871 | 215 | VVTLBBEDFDVE  | FALSE | TRUE | FALSE | 37.83 |
| P09871 | 216 | VTLBBEDFDVEA  | FALSE | TRUE | FALSE | 19.64 |
| P09871 | 217 | TLBBEDFDVEAA  | FALSE | TRUE | FALSE | 20.7  |
| P09871 | 218 | LBBEDFDVEAAD  | FALSE | TRUE | FALSE | 20.3  |
| P09871 | 219 | BBEDFDVEAADS  | FALSE | TRUE | FALSE | 11.67 |
| P09871 | 304 | WEPAKAKYVFBD  | FALSE | TRUE | FALSE | 13.8  |
| P09871 | 305 | EPAKAKYVFBDV  | FALSE | TRUE | FALSE | 12.95 |
| P09871 | 309 | AKYVFBDVVQIT  | FALSE | TRUE | FALSE | 10.86 |
| P09871 | 327 | VVEGBVGATSFY  | FALSE | TRUE | FALSE | 10.75 |
| P09871 | 426 | GVPBEPFEEKQB  | FALSE | TRUE | FALSE | 10.56 |
| P09871 | 485 | MYVGSTSVQTSB  | FALSE | TRUE | FALSE | 10.46 |
| P09871 | 521 | EBTNFDNDIAL   | FALSE | TRUE | FALSE | 10.24 |
| P09871 | 522 | GBTNFDNDIALV  | FALSE | TRUE | FALSE | 10.8  |
| P09871 | 565 | GLISGWGBTEKB  | FALSE | TRUE | FALSE | 26.54 |
| P09871 | 566 | LISGWGBTEKBD  | FALSE | TRUE | FALSE | 17.69 |
| P09871 | 567 | ISGWGBTEKBDB  | FALSE | TRUE | FALSE | 19.92 |
| P09871 | 568 | SGWGBTEKBDBA  | FALSE | TRUE | FALSE | 16.16 |
| P09871 | 569 | GWGBTEKBDBAV  | FALSE | TRUE | FALSE | 28.9  |
| P09871 | 570 | WGBTEKBDBAVB  | FALSE | TRUE | FALSE | 26.26 |
| P09871 | 571 | GBTEKBDBAVBL  | FALSE | TRUE | FALSE | 29.33 |
| P09871 | 572 | BTEKBDBAVBLK  | FALSE | TRUE | FALSE | 31.83 |
| P09871 | 573 | TEKBDBAVBLKA  | FALSE | TRUE | FALSE | 24.96 |
| P09871 | 576 | BDBAVBLKAABL  | FALSE | TRUE | FALSE | 28.44 |
| P09871 | 577 | DBAVBLKAABLP  | FALSE | TRUE | FALSE | 18.45 |
| P09871 | 656 | GPQCGTYGLYTB  | FALSE | TRUE | FALSE | 14.13 |
| P06681 | 51  | CPQGLYPSPASB  | FALSE | TRUE | FALSE | 20.02 |
| P06681 | 66  | SSGQWQTPGATB  | FALSE | TRUE | FALSE | 14.41 |
| P06681 | 67  | SGQWQTPGATBS  | FALSE | TRUE | FALSE | 15.92 |
| P06681 | 68  | GQWQTPGATBSL  | FALSE | TRUE | FALSE | 11.47 |

|        |     |               |       |      |       |       |
|--------|-----|---------------|-------|------|-------|-------|
| P06681 | 69  | QWQTPGATBSLS  | FALSE | TRUE | FALSE | 14.7  |
| P06681 | 92  | PVSFENGIYTPB  | FALSE | TRUE | FALSE | 12.04 |
| P06681 | 93  | VSFENGIYTPBL  | FALSE | TRUE | FALSE | 16.37 |
| P06681 | 94  | SFENGIYTPBLG  | FALSE | TRUE | FALSE | 20.3  |
| P06681 | 95  | FENGIYTPBLGS  | FALSE | TRUE | FALSE | 16.75 |
| P06681 | 96  | ENGIYTPBLGSY  | FALSE | TRUE | FALSE | 20.67 |
| P06681 | 97  | NGIYTPBLGSYP  | FALSE | TRUE | FALSE | 14.7  |
| P06681 | 98  | GIYTPBLGSYPV  | FALSE | TRUE | FALSE | 17.95 |
| P06681 | 99  | IYTPBLGSYPVG  | FALSE | TRUE | FALSE | 18.96 |
| P06681 | 100 | YTPBLGSYPVGG  | FALSE | TRUE | FALSE | 11.51 |
| P06681 | 101 | TPBLGSYPVGGN  | FALSE | TRUE | FALSE | 14.94 |
| P06681 | 102 | PBLGSYPVGGNV  | FALSE | TRUE | FALSE | 11.98 |
| P06681 | 114 | SFECEDGFILBG  | FALSE | TRUE | FALSE | 11.2  |
| P06681 | 115 | FECEDGFILBGS  | FALSE | TRUE | FALSE | 17.72 |
| P06681 | 116 | ECEDGFILBGSP  | FALSE | TRUE | FALSE | 22    |
| P06681 | 117 | CEDGFILBGSPV  | FALSE | TRUE | FALSE | 31.34 |
| P06681 | 118 | EDGFILBGSPVB  | FALSE | TRUE | FALSE | 29.41 |
| P06681 | 119 | DGFILBGSPVBQ  | FALSE | TRUE | FALSE | 87.95 |
| P06681 | 120 | GFILBGSPVBQC  | FALSE | TRUE | FALSE | 48.68 |
| P06681 | 121 | FILBGSPVBQCB  | FALSE | TRUE | FALSE | 41.73 |
| P06681 | 122 | ILBGSPVBQCBP  | FALSE | TRUE | FALSE | 31.47 |
| P06681 | 123 | LBGSPVBQCBPN  | FALSE | TRUE | FALSE | 38.52 |
| P06681 | 124 | BGSPVBQCBPNG  | FALSE | TRUE | FALSE | 32.72 |
| P06681 | 155 | GISLGAVBTGFB  | FALSE | TRUE | FALSE | 10.44 |
| P06681 | 157 | SLGAVBTGFBBFG | FALSE | TRUE | FALSE | 11.74 |
| P06681 | 159 | GAVBTGFBBFGHG | FALSE | TRUE | FALSE | 11.25 |
| P06681 | 160 | AVBTGFBBFGHGD | FALSE | TRUE | FALSE | 19.08 |
| P06681 | 161 | VBTGFBBFGHGDK | FALSE | TRUE | FALSE | 15.62 |
| P06681 | 162 | BTGFBBFGHGDKV | FALSE | TRUE | FALSE | 13.57 |
| P06681 | 163 | TGFBBFGHGDKVB | FALSE | TRUE | FALSE | 14.69 |
| P06681 | 165 | FBFGHGDKVBYB  | FALSE | TRUE | FALSE | 10.98 |
| P06681 | 166 | BFGHGDKVBYBC  | FALSE | TRUE | FALSE | 10.81 |
| P06681 | 170 | GDKVBYBCSSNL  | FALSE | TRUE | FALSE | 12.04 |
| P06681 | 360 | ETMAWQEIBHAI  | FALSE | TRUE | FALSE | 12.36 |
| P06681 | 361 | TMAWQEIBHAI   | FALSE | TRUE | FALSE | 14.73 |
| P06681 | 389 | VDHIBEILNINQ  | FALSE | TRUE | FALSE | 12.39 |
| P06681 | 391 | HIBEILNINQKB  | FALSE | TRUE | FALSE | 16.13 |
| P06681 | 392 | IBEILNINQKBN  | FALSE | TRUE | FALSE | 20.16 |
| P06681 | 393 | BEILNINQKBND  | FALSE | TRUE | FALSE | 11.64 |
| P06681 | 397 | NINQKBN DYLDI | FALSE | TRUE | FALSE | 11.81 |
| P06681 | 420 | WBELNELGSKKD  | FALSE | TRUE | FALSE | 15.5  |
| P06681 | 430 | KDGE BHAFILQD | FALSE | TRUE | FALSE | 13.07 |
| P06681 | 431 | DGE BHAFILQDT | FALSE | TRUE | FALSE | 18.96 |
| P06681 | 432 | GEBHAFILQDTK  | FALSE | TRUE | FALSE | 19.4  |
| P06681 | 433 | EBHAFILQDTKA  | FALSE | TRUE | FALSE | 14.72 |
| P06681 | 486 | PKSQETCBGALI  | FALSE | TRUE | FALSE | 13.18 |
| P06681 | 487 | KSQETCBGALIS  | FALSE | TRUE | FALSE | 14.13 |
| P06681 | 488 | SQETCBGALISD  | FALSE | TRUE | FALSE | 13.99 |
| P06681 | 489 | QETCBGALISDQ  | FALSE | TRUE | FALSE | 22.19 |
| P06681 | 490 | ETCBGALISDQW  | FALSE | TRUE | FALSE | 15.72 |
| P06681 | 491 | TCBGALISDQWV  | FALSE | TRUE | FALSE | 14.86 |
| P06681 | 492 | CBGALISDQWWL  | FALSE | TRUE | FALSE | 11.75 |

|        |     |                |       |      |       |       |
|--------|-----|----------------|-------|------|-------|-------|
| P06681 | 508 | CFBDGNDHSLWB   | FALSE | TRUE | FALSE | 11.03 |
| P06681 | 509 | FBDGNDHSLWBV   | FALSE | TRUE | FALSE | 10.48 |
| P06681 | 587 | EANLALBBPQGS   | FALSE | TRUE | FALSE | 13.88 |
| P06681 | 588 | ANLALBBPQGST   | FALSE | TRUE | FALSE | 13.97 |
| P06681 | 590 | LALBBPQGSTCB   | FALSE | TRUE | FALSE | 20.08 |
| P06681 | 591 | ALBBPQGSTCBD   | FALSE | TRUE | FALSE | 10.21 |
| P06681 | 592 | LBBPQGSTCBDH   | FALSE | TRUE | FALSE | 10.27 |
| P06681 | 593 | BBPQGSTCBDHE   | FALSE | TRUE | FALSE | 11.33 |
| P06681 | 676 | KGESGGAVFLEB   | FALSE | TRUE | FALSE | 10.04 |
| P06681 | 677 | GESGGAVFLEBB   | FALSE | TRUE | FALSE | 14.1  |
| P06681 | 716 | BAPBSKVPPPBD   | FALSE | TRUE | FALSE | 10.97 |
| P06681 | 730 | INLFBMQPWL BQ  | FALSE | TRUE | FALSE | 13.99 |
| P06681 | 732 | LFBMQPWL BQHL  | FALSE | TRUE | FALSE | 10.13 |
| P06681 | 733 | FBMQPWL BQH LG | FALSE | TRUE | FALSE | 20.62 |
| P06681 | 734 | BMQPWL BQH LGD | FALSE | TRUE | FALSE | 33.26 |
| P06681 | 735 | MQPWL BQH LGDV | FALSE | TRUE | FALSE | 22.59 |
| P06681 | 736 | QPWL BQH LGDVL | FALSE | TRUE | FALSE | 16.28 |
| P01024 | 92  | ANBEFKSEKGBN   | FALSE | TRUE | FALSE | 10.15 |
| P01024 | 197 | ELVNMGQWKIBA   | FALSE | TRUE | FALSE | 14.3  |
| P01024 | 205 | KIBAYYENSPQQ   | FALSE | TRUE | FALSE | 10.48 |
| P01024 | 279 | EQBISLPESLKB   | FALSE | TRUE | FALSE | 27.23 |
| P01024 | 280 | QBISLPESLKBI   | FALSE | TRUE | FALSE | 17.11 |
| P01024 | 298 | GEVVL SBKVLLD  | FALSE | TRUE | FALSE | 10.9  |
| P01024 | 299 | EVVLSBKVLLDG   | FALSE | TRUE | FALSE | 10.99 |
| P01024 | 301 | VLSBKVLLDGVQ   | FALSE | TRUE | FALSE | 13.46 |
| P01024 | 302 | LSBKVLLDGVQN   | FALSE | TRUE | FALSE | 16.25 |
| P01024 | 303 | SBKVLLDGVQNP   | FALSE | TRUE | FALSE | 11.21 |
| P01024 | 422 | ITVBTKKQELSE   | FALSE | TRUE | FALSE | 17.8  |
| P01024 | 436 | QATBTMQALPYS   | FALSE | TRUE | FALSE | 14.65 |
| P01024 | 437 | ATBTMQALPYST   | FALSE | TRUE | FALSE | 14.8  |
| P01024 | 473 | VNLLBMDBAHE    | FALSE | TRUE | FALSE | 12.89 |
| P01024 | 474 | NLLBMDBAHEA    | FALSE | TRUE | FALSE | 10.75 |
| P01024 | 475 | FLLBMDBAHEAK   | FALSE | TRUE | FALSE | 18.3  |
| P01024 | 476 | LLBMDBAHEAKI   | FALSE | TRUE | FALSE | 13.43 |
| P01024 | 477 | LBMDBAHEAKIB   | FALSE | TRUE | FALSE | 17.52 |
| P01024 | 478 | BMDBAHEAKIBY   | FALSE | TRUE | FALSE | 15.33 |
| P01024 | 480 | DBAHEAKIBYYT   | FALSE | TRUE | FALSE | 10.77 |
| P01024 | 498 | GBLLKAGBQVBE   | FALSE | TRUE | FALSE | 31.45 |
| P01024 | 499 | BLLKAGBQVBEP   | FALSE | TRUE | FALSE | 42.96 |
| P01024 | 500 | LLKAGBQVBEPG   | FALSE | TRUE | FALSE | 24.19 |
| P01024 | 501 | LKAGBQVBEPGQ   | FALSE | TRUE | FALSE | 12.95 |
| P01024 | 502 | KAGBQVBEPGQD   | FALSE | TRUE | FALSE | 48.27 |
| P01024 | 503 | AGBQVBEPGQDL   | FALSE | TRUE | FALSE | 52.62 |
| P01024 | 504 | GBQVBEPGQDLV   | FALSE | TRUE | FALSE | 39.97 |
| P01024 | 505 | BQVBEPGQDLVV   | FALSE | TRUE | FALSE | 20.52 |
| P01024 | 535 | YTLIGASQBEV    | FALSE | TRUE | FALSE | 11.59 |
| P01024 | 657 | BAELQCPQPAAB   | FALSE | TRUE | FALSE | 11.68 |
| P01024 | 658 | AELQCPQPAABB   | FALSE | TRUE | FALSE | 11.26 |
| P01024 | 662 | CPQPAABBBBSV   | FALSE | TRUE | FALSE | 14.48 |
| P01024 | 663 | PQPAABBBBSVQ   | FALSE | TRUE | FALSE | 21.44 |
| P01024 | 664 | QPAABBBBSVQL   | FALSE | TRUE | FALSE | 21.48 |
| P01024 | 665 | PAABBBBSVQLT   | FALSE | TRUE | FALSE | 24.67 |

|        |     |               |       |      |       |       |
|--------|-----|---------------|-------|------|-------|-------|
| P01024 | 666 | AABBBBSVQLTE  | FALSE | TRUE | FALSE | 32.22 |
| P01024 | 667 | ABBBBSVQLTEK  | FALSE | TRUE | FALSE | 25.99 |
| P01024 | 668 | BBBBSVQLTEKB  | FALSE | TRUE | FALSE | 37.84 |
| P01024 | 669 | BBBSVQLTEKBM  | FALSE | TRUE | FALSE | 32.27 |
| P01024 | 670 | BBSVQLTEKBMD  | FALSE | TRUE | FALSE | 18.55 |
| P01024 | 671 | BSVQLTEKBMDK  | FALSE | TRUE | FALSE | 13.57 |
| P01024 | 697 | GMBENPMBFSCQ  | FALSE | TRUE | FALSE | 12.86 |
| P01024 | 698 | MBENPMBFSCQB  | FALSE | TRUE | FALSE | 17.89 |
| P01024 | 699 | BENPMBFSCQBB  | FALSE | TRUE | FALSE | 23.28 |
| P01024 | 700 | ENPMBFSCQBBT  | FALSE | TRUE | FALSE | 16.42 |
| P01024 | 701 | NPMBFSCQB BTB | FALSE | TRUE | FALSE | 24.72 |
| P01024 | 702 | PMBFSCQB BTBF | FALSE | TRUE | FALSE | 19.36 |
| P01024 | 703 | MBFSCQB BTBFI | FALSE | TRUE | FALSE | 18.67 |
| P01024 | 704 | BFSCQB BTBFIS | FALSE | TRUE | FALSE | 15.58 |
| P01024 | 707 | CQB BTBFISLGE | FALSE | TRUE | FALSE | 14.86 |
| P01024 | 708 | QB BTBFISLGEA | FALSE | TRUE | FALSE | 12.84 |
| P01024 | 725 | LDCCNYITELBB  | FALSE | TRUE | FALSE | 11.86 |
| P01024 | 726 | DCCNYITELBBQ  | FALSE | TRUE | FALSE | 18.32 |
| P01024 | 727 | CCNYITELBBQH  | FALSE | TRUE | FALSE | 17.24 |
| P01024 | 728 | CNYITELBBQHA  | FALSE | TRUE | FALSE | 19.36 |
| P01024 | 729 | NYITELBBQHAB  | FALSE | TRUE | FALSE | 22.63 |
| P01024 | 730 | YITELBBQHABA  | FALSE | TRUE | FALSE | 30.71 |
| P01024 | 731 | ITELBBQHABAS  | FALSE | TRUE | FALSE | 25.46 |
| P01024 | 732 | TELBBQHABASH  | FALSE | TRUE | FALSE | 34.89 |
| P01024 | 733 | ELBBQHABASHL  | FALSE | TRUE | FALSE | 38.88 |
| P01024 | 734 | LBBQHABASHLG  | FALSE | TRUE | FALSE | 24.02 |
| P01024 | 735 | BBQHABASHLGL  | FALSE | TRUE | FALSE | 22.55 |
| P01024 | 736 | BQHABASHLGLA  | FALSE | TRUE | FALSE | 25.4  |
| P01024 | 737 | QHABASHLGLAB  | FALSE | TRUE | FALSE | 24.6  |
| P01024 | 738 | HABASHLGLABS  | FALSE | TRUE | FALSE | 21.85 |
| P01024 | 739 | ABASHLGLABSN  | FALSE | TRUE | FALSE | 25.03 |
| P01024 | 740 | BASHLGLABSNL  | FALSE | TRUE | FALSE | 16.02 |
| P01024 | 743 | HLGLABSNLDED  | FALSE | TRUE | FALSE | 11.4  |
| P01024 | 744 | LGLABSNLDEDI  | FALSE | TRUE | FALSE | 10.31 |
| P01024 | 745 | GLABSNLDEDII  | FALSE | TRUE | FALSE | 11.17 |
| P01024 | 759 | ENIVSBSEFPES  | FALSE | TRUE | FALSE | 10.32 |
| P01024 | 760 | NIVSBSEFPESW  | FALSE | TRUE | FALSE | 13.27 |
| P01024 | 761 | IVSBSEFPESWL  | FALSE | TRUE | FALSE | 21.09 |
| P01024 | 831 | IDLBLPYSVVBN  | FALSE | TRUE | FALSE | 12.03 |
| P01024 | 832 | DLBLPYSVVBNE  | FALSE | TRUE | FALSE | 10.4  |
| P01024 | 833 | LBLPYSVVBNEQ  | FALSE | TRUE | FALSE | 10.6  |
| P01024 | 834 | BLPYSVVBNEQV  | FALSE | TRUE | FALSE | 12.71 |
| P01024 | 837 | YSVVBNEQVEIB  | FALSE | TRUE | FALSE | 14.18 |
| P01024 | 845 | VEIBAVLYNYBQ  | FALSE | TRUE | FALSE | 15.12 |
| P01024 | 846 | EIBAVLYNYBQN  | FALSE | TRUE | FALSE | 12.91 |
| P01024 | 848 | BAVLYNYBQNQE  | FALSE | TRUE | FALSE | 24.03 |
| P01024 | 849 | AVLYNYBQNQEL  | FALSE | TRUE | FALSE | 16.31 |
| P01024 | 850 | VLYNYBQNQELK  | FALSE | TRUE | FALSE | 27.49 |
| P01024 | 851 | LYNYBQNQELKV  | FALSE | TRUE | FALSE | 22.87 |
| P01024 | 852 | YNYBQNQELKVB  | FALSE | TRUE | FALSE | 44.14 |
| P01024 | 853 | NYBQNQELKVBV  | FALSE | TRUE | FALSE | 22.62 |
| P01024 | 854 | YBQNQELKVBVE  | FALSE | TRUE | FALSE | 29.97 |

|        |      |               |       |      |       |       |
|--------|------|---------------|-------|------|-------|-------|
| P01024 | 870  | PAFCSLATTKBB  | FALSE | TRUE | FALSE | 11.69 |
| P01024 | 872  | FCSLATTKBBHQ  | FALSE | TRUE | FALSE | 12.94 |
| P01024 | 873  | CSLATTKBBHQQ  | FALSE | TRUE | FALSE | 23.81 |
| P01024 | 874  | SLATTKBBHQQT  | FALSE | TRUE | FALSE | 14.11 |
| P01024 | 875  | LATTKBBHQQTV  | FALSE | TRUE | FALSE | 13.93 |
| P01024 | 877  | TTKBBHQQVTI   | FALSE | TRUE | FALSE | 19.57 |
| P01024 | 878  | TKBBHQQVTIP   | FALSE | TRUE | FALSE | 10.18 |
| P01024 | 923  | DGVBKSLKVVPE  | FALSE | TRUE | FALSE | 12.47 |
| P01024 | 934  | EGIBMNKTVAVB  | FALSE | TRUE | FALSE | 10.28 |
| P01024 | 943  | AVBTLDPPEBLGB | FALSE | TRUE | FALSE | 12.21 |
| P01024 | 944  | VBTLDPPEBLGBE | FALSE | TRUE | FALSE | 12.09 |
| P01024 | 945  | BTLDPPEBLGBEG | FALSE | TRUE | FALSE | 12.8  |
| P01024 | 946  | TLPPEBLGBEGV  | FALSE | TRUE | FALSE | 11.77 |
| P01024 | 947  | LDPEBLGBEGVQ  | FALSE | TRUE | FALSE | 11.02 |
| P01024 | 948  | DPEBLGBEGVQK  | FALSE | TRUE | FALSE | 23.36 |
| P01024 | 949  | PEBLGBEGVQKE  | FALSE | TRUE | FALSE | 15.43 |
| P01024 | 950  | EBLGBEGVQKED  | FALSE | TRUE | FALSE | 19.22 |
| P01024 | 951  | BLGBEGVQKEDI  | FALSE | TRUE | FALSE | 30.81 |
| P01024 | 952  | LGBEGVQKEDIP  | FALSE | TRUE | FALSE | 30.8  |
| P01024 | 953  | GBEGVQKEDIPP  | FALSE | TRUE | FALSE | 23.76 |
| P01024 | 1031 | TEQWEKFGLEKB  | FALSE | TRUE | FALSE | 10.59 |
| P01024 | 1032 | EQWEKFGLEKBQ  | FALSE | TRUE | FALSE | 16.52 |
| P01024 | 1033 | QWEKFGLEKBQG  | FALSE | TRUE | FALSE | 19.62 |
| P01024 | 1034 | WEKFGLEKBQGA  | FALSE | TRUE | FALSE | 17.22 |
| P01024 | 1035 | EKFGLEKBQGAL  | FALSE | TRUE | FALSE | 17.43 |
| P01024 | 1036 | KFGLEKBQGALE  | FALSE | TRUE | FALSE | 23.9  |
| P01024 | 1037 | FGLEKBQGALEL  | FALSE | TRUE | FALSE | 45.65 |
| P01024 | 1038 | GLEKBQGALELI  | FALSE | TRUE | FALSE | 38.09 |
| P01024 | 1039 | LEKBQGALELIK  | FALSE | TRUE | FALSE | 39.35 |
| P01024 | 1052 | GYTQQLAFBQPS  | FALSE | TRUE | FALSE | 13.47 |
| P01024 | 1053 | YTQQLAFBQPSS  | FALSE | TRUE | FALSE | 36.12 |
| P01024 | 1054 | TQQLAFBQPSSA  | FALSE | TRUE | FALSE | 39.19 |
| P01024 | 1055 | QQLAFBQPSSAF  | FALSE | TRUE | FALSE | 24.62 |
| P01024 | 1056 | QLAFBQPSSAFA  | FALSE | TRUE | FALSE | 12.81 |
| P01024 | 1295 | DVSLQLPSBSSK  | FALSE | TRUE | FALSE | 12.8  |
| P01024 | 1297 | SLQLPSBSSKIT  | FALSE | TRUE | FALSE | 10.59 |
| P01024 | 1299 | QLPSBSSKITHB  | FALSE | TRUE | FALSE | 20.72 |
| P01024 | 1300 | LPSBSSKITHBI  | FALSE | TRUE | FALSE | 11.95 |
| P01024 | 1384 | MILEICTBYBGD  | FALSE | TRUE | FALSE | 14.04 |
| P01024 | 1385 | ILEICTBYBGDQ  | FALSE | TRUE | FALSE | 25.76 |
| P01024 | 1386 | LEICTBYBGDQD  | FALSE | TRUE | FALSE | 23.78 |
| P01024 | 1387 | EICTBYBGDQDA  | FALSE | TRUE | FALSE | 33.39 |
| P01024 | 1388 | ICTBYBGDQDAT  | FALSE | TRUE | FALSE | 47.16 |
| P01024 | 1389 | CTBYBGDQDATM  | FALSE | TRUE | FALSE | 39.61 |
| P01024 | 1390 | TBYBGDQDATMS  | FALSE | TRUE | FALSE | 44.82 |
| P01024 | 1391 | BYBGDQDATMSI  | FALSE | TRUE | FALSE | 23.12 |
| P01024 | 1392 | YBGDQDATMSIL  | FALSE | TRUE | FALSE | 12.69 |
| P01024 | 1432 | YELDKAFSDBNT  | FALSE | TRUE | FALSE | 15.31 |
| P01024 | 1433 | ELDKAFSDBNTL  | FALSE | TRUE | FALSE | 12.9  |
| P01024 | 1434 | LDKAFSDBNTLI  | FALSE | TRUE | FALSE | 34.89 |
| P01024 | 1435 | DKAFSDBNTLII  | FALSE | TRUE | FALSE | 12.77 |
| P01024 | 1537 | CEPGVDYVYKTB  | FALSE | TRUE | FALSE | 36.08 |

|        |      |              |       |      |       |       |
|--------|------|--------------|-------|------|-------|-------|
| P01024 | 1538 | EPGVDYVYKTBL | FALSE | TRUE | FALSE | 15.25 |
| P01024 | 1581 | QBTFISPIKCBE | FALSE | TRUE | FALSE | 24.2  |
| P01024 | 1582 | BTFISPIKCBEA | FALSE | TRUE | FALSE | 15.97 |
| P01024 | 1583 | TFISPIKCBEAL | FALSE | TRUE | FALSE | 13.12 |
| P01024 | 1588 | IKCBEALKLEEK | FALSE | TRUE | FALSE | 13.66 |
| P01024 | 1590 | CBEALKLEEKKH | FALSE | TRUE | FALSE | 15.08 |
| P0C0L4 | 42   | QLQDVPBGQVVK | FALSE | TRUE | FALSE | 11.24 |
| P0C0L4 | 43   | LQDVPBGQVVKG | FALSE | TRUE | FALSE | 13.81 |
| P0C0L4 | 44   | QDVPBGQVVKGS | FALSE | TRUE | FALSE | 13.93 |
| P0C0L4 | 45   | DVPBGQVVKGSV | FALSE | TRUE | FALSE | 12.9  |
| P0C0L4 | 55   | SVFLBNPSBNNV | FALSE | TRUE | FALSE | 13.27 |
| P0C0L4 | 58   | LBNPSBNNVPCS | FALSE | TRUE | FALSE | 11.03 |
| P0C0L4 | 119  | DSLBTNNIQGI  | FALSE | TRUE | FALSE | 10.43 |
| P0C0L4 | 120  | SLSBTNNIQGIN | FALSE | TRUE | FALSE | 12.99 |
| P0C0L4 | 128  | QGINLLFSSBBG | FALSE | TRUE | FALSE | 15.82 |
| P0C0L4 | 129  | GINLLFSSBBGH | FALSE | TRUE | FALSE | 13.93 |
| P0C0L4 | 130  | INLLFSSBBGHL | FALSE | TRUE | FALSE | 21.43 |
| P0C0L4 | 133  | LFSSBBGHLFLQ | FALSE | TRUE | FALSE | 12.06 |
| P0C0L4 | 134  | FSSBBGHLFLQT | FALSE | TRUE | FALSE | 25.01 |
| P0C0L4 | 135  | SSBBGHLFLQTD | FALSE | TRUE | FALSE | 39.15 |
| P0C0L4 | 136  | SBBGHLFLQTDQ | FALSE | TRUE | FALSE | 44.41 |
| P0C0L4 | 137  | BBGHLFLQTDQP | FALSE | TRUE | FALSE | 22.67 |
| P0C0L4 | 147  | QPIYNPGQBVBY | FALSE | TRUE | FALSE | 10.75 |
| P0C0L4 | 207  | ISEPGTWKISAB | FALSE | TRUE | FALSE | 16.35 |
| P0C0L4 | 211  | GTWKISABFSDG | FALSE | TRUE | FALSE | 12.83 |
| P0C0L4 | 212  | TWKISABFSDGL | FALSE | TRUE | FALSE | 11.57 |
| P0C0L4 | 213  | WKISABFSDGLE | FALSE | TRUE | FALSE | 18.7  |
| P0C0L4 | 214  | KISABFSDGLES | FALSE | TRUE | FALSE | 21.2  |
| P0C0L4 | 215  | ISABFSDGLESN | FALSE | TRUE | FALSE | 21.81 |
| P0C0L4 | 216  | SABFSDGLESNS | FALSE | TRUE | FALSE | 13.3  |
| P0C0L4 | 280  | AYVBFGLLDEDG | FALSE | TRUE | FALSE | 15.33 |
| P0C0L4 | 281  | YVBFGLLDEDGK | FALSE | TRUE | FALSE | 17.72 |
| P0C0L4 | 282  | VBFGLLDEDGKK | FALSE | TRUE | FALSE | 10.64 |
| P0C0L4 | 287  | LDEDGKKTFFBG | FALSE | TRUE | FALSE | 12.9  |
| P0C0L4 | 288  | DEDGKKTFFBGL | FALSE | TRUE | FALSE | 16.74 |
| P0C0L4 | 289  | EDGKKTFFBGLE | FALSE | TRUE | FALSE | 17.44 |
| P0C0L4 | 290  | DGKKTFFBGLES | FALSE | TRUE | FALSE | 26.24 |
| P0C0L4 | 292  | KKTFFBGLESQT | FALSE | TRUE | FALSE | 15.75 |
| P0C0L4 | 293  | KTFFBGLESQTK | FALSE | TRUE | FALSE | 13.82 |
| P0C0L4 | 294  | TFFBGLESQTKL | FALSE | TRUE | FALSE | 28.88 |
| P0C0L4 | 295  | FFBGLESQTKLV | FALSE | TRUE | FALSE | 28.05 |
| P0C0L4 | 296  | FBGLESQTKLVN | FALSE | TRUE | FALSE | 24.73 |
| P0C0L4 | 450  | AGSPHPAIABLT | FALSE | TRUE | FALSE | 15.34 |
| P0C0L4 | 455  | PAIABLVAAPP  | FALSE | TRUE | FALSE | 10.55 |
| P0C0L4 | 456  | AIABLVAAPPS  | FALSE | TRUE | FALSE | 11.5  |
| P0C0L4 | 457  | IABLVAAPPSG  | FALSE | TRUE | FALSE | 16.2  |
| P0C0L4 | 458  | ABLVAAPPSGG  | FALSE | TRUE | FALSE | 11.19 |
| P0C0L4 | 505  | YYMILSBGQIV  | FALSE | TRUE | FALSE | 14.15 |
| P0C0L4 | 507  | YMILSBGQIVFM | FALSE | TRUE | FALSE | 14.83 |
| P0C0L4 | 508  | MILSBGQIVFMN | FALSE | TRUE | FALSE | 30.02 |
| P0C0L4 | 509  | ILSBGQIVFMNB | FALSE | TRUE | FALSE | 29.96 |
| P0C0L4 | 510  | LSBGQIVFMNBE | FALSE | TRUE | FALSE | 71.31 |



|        |     |               |       |      |       |       |
|--------|-----|---------------|-------|------|-------|-------|
| P0C0L4 | 511 | SBGQIVFMNBEP  | FALSE | TRUE | FALSE | 55.99 |
| P0C0L4 | 512 | BGQIVFMNBEPK  | FALSE | TRUE | FALSE | 40.23 |
| P0C0L4 | 513 | GQIVFMNBEPKB  | FALSE | TRUE | FALSE | 25.16 |
| P0C0L4 | 514 | QIVFMNBEPKBT  | FALSE | TRUE | FALSE | 29.87 |
| P0C0L4 | 515 | IVFMNBEPKBTL  | FALSE | TRUE | FALSE | 21.61 |
| P0C0L4 | 516 | VFMNBEPKBTLT  | FALSE | TRUE | FALSE | 32.45 |
| P0C0L4 | 517 | FMNBEPKBTLTS  | FALSE | TRUE | FALSE | 34.04 |
| P0C0L4 | 518 | MNBEPKBTLTSV  | FALSE | TRUE | FALSE | 11.08 |
| P0C0L4 | 519 | NBEPKBTLTSVS  | FALSE | TRUE | FALSE | 10.54 |
| P0C0L4 | 574 | SVDGAKQYBNGE  | FALSE | TRUE | FALSE | 10.35 |
| P0C0L4 | 575 | VDGAKQYBNGES  | FALSE | TRUE | FALSE | 14.69 |
| P0C0L4 | 576 | DGAKQYBNGESV  | FALSE | TRUE | FALSE | 17.66 |
| P0C0L4 | 580 | QYBNGESVKLHL  | FALSE | TRUE | FALSE | 13.54 |
| P0C0L4 | 581 | YBNGESVKLHLE  | FALSE | TRUE | FALSE | 18.4  |
| P0C0L4 | 653 | AFSDGDQWTLSE  | FALSE | TRUE | FALSE | 10.28 |
| P0C0L4 | 654 | FSDGDQWTLSEB  | FALSE | TRUE | FALSE | 13.66 |
| P0C0L4 | 655 | SDGDQWTLSEBK  | FALSE | TRUE | FALSE | 25.16 |
| P0C0L4 | 656 | DGDQWTLSEBKBL | FALSE | TRUE | FALSE | 20.01 |
| P0C0L4 | 657 | GDQWTLSEBKBL  | FALSE | TRUE | FALSE | 16.21 |
| P0C0L4 | 658 | DQWTLSEBKBLSC | FALSE | TRUE | FALSE | 12.62 |
| P0C0L4 | 698 | TAKBCCQDGVTB  | FALSE | TRUE | FALSE | 14.11 |
| P0C0L4 | 699 | AKBCCQDGVTB   | FALSE | TRUE | FALSE | 16.89 |
| P0C0L4 | 708 | TBLPMMBSCEQB  | FALSE | TRUE | FALSE | 10.11 |
| P0C0L4 | 712 | MMBSCEQBAABV  | FALSE | TRUE | FALSE | 11.73 |
| P0C0L4 | 713 | MBSCEQBAABVQ  | FALSE | TRUE | FALSE | 18.78 |
| P0C0L4 | 714 | BSCEQBAABVQQ  | FALSE | TRUE | FALSE | 21.5  |
| P0C0L4 | 715 | SCEQBAABVQQP  | FALSE | TRUE | FALSE | 15.79 |
| P0C0L4 | 716 | CEQBAABVQQPD  | FALSE | TRUE | FALSE | 14.17 |
| P0C0L4 | 717 | EQBAABVQQPDC  | FALSE | TRUE | FALSE | 11.92 |
| P0C0L4 | 718 | QBAABVQQPDCB  | FALSE | TRUE | FALSE | 21.93 |
| P0C0L4 | 719 | BAABVQQPDCBE  | FALSE | TRUE | FALSE | 19.09 |
| P0C0L4 | 720 | AABVQQPDCBEP  | FALSE | TRUE | FALSE | 11.75 |
| P0C0L4 | 721 | ABVQQPDCBEPF  | FALSE | TRUE | FALSE | 10.04 |
| P0C0L4 | 746 | SBDKGGAGLQBA  | FALSE | TRUE | FALSE | 14.25 |
| P0C0L4 | 837 | LBLPMSVBBFEQ  | FALSE | TRUE | FALSE | 13.64 |
| P0C0L4 | 838 | BLPMSVBBFEQL  | FALSE | TRUE | FALSE | 17.54 |
| P0C0L4 | 839 | LPMSVBBFEQLE  | FALSE | TRUE | FALSE | 15.87 |
| P0C0L4 | 841 | MSVBBFEQLELB  | FALSE | TRUE | FALSE | 13.89 |
| P0C0L4 | 842 | SVBBFEQLELBP  | FALSE | TRUE | FALSE | 18.59 |
| P0C0L4 | 843 | VBBFEQLELBPV  | FALSE | TRUE | FALSE | 16.89 |
| P0C0L4 | 844 | BBFEQLELBPVL  | FALSE | TRUE | FALSE | 22.18 |
| P0C0L4 | 909 | VSLKVVABGSFE  | FALSE | TRUE | FALSE | 36.17 |
| P0C0L4 | 910 | SLKVVABGSFEF  | FALSE | TRUE | FALSE | 23.1  |
| P0C0L4 | 911 | LKVVABGSFEFP  | FALSE | TRUE | FALSE | 32.72 |
| P0C0L4 | 912 | KVVABGSFEFPV  | FALSE | TRUE | FALSE | 46.32 |
| P0C0L4 | 913 | VVABGSFEFPVG  | FALSE | TRUE | FALSE | 43.49 |
| P0C0L4 | 914 | VABGSFEFPVGD  | FALSE | TRUE | FALSE | 34.99 |
| P0C0L4 | 915 | ABGSFEFPVGDA  | FALSE | TRUE | FALSE | 23.93 |
| P0C0L4 | 916 | BGSFEFPVGDAV  | FALSE | TRUE | FALSE | 10.6  |
| P0C0L4 | 935 | KEGAIHBEELVY  | FALSE | TRUE | FALSE | 16.41 |
| P0C0L4 | 936 | EGAIHBEELVYE  | FALSE | TRUE | FALSE | 11.26 |
| P0C0L4 | 938 | AIHBEELVYELN  | FALSE | TRUE | FALSE | 14.46 |

|        |      |              |       |      |       |       |
|--------|------|--------------|-------|------|-------|-------|
| P0C0L4 | 944  | LVYELNPLDHBG | FALSE | TRUE | FALSE | 10.01 |
| P0C0L4 | 945  | VYELNPLDHBGB | FALSE | TRUE | FALSE | 17.36 |
| P0C0L4 | 946  | YELNPLDHBGBT | FALSE | TRUE | FALSE | 26.8  |
| P0C0L4 | 947  | ELNPLDHBGBTL | FALSE | TRUE | FALSE | 22.23 |
| P0C0L4 | 948  | LNPLDHBGBTLE | FALSE | TRUE | FALSE | 33.11 |
| P0C0L4 | 949  | NPLDHBGBTLEI | FALSE | TRUE | FALSE | 30.05 |
| P0C0L4 | 950  | PLDHBGBTLEIP | FALSE | TRUE | FALSE | 15.22 |
| P0C0L4 | 951  | LDHBGBTLEIPG | FALSE | TRUE | FALSE | 44.7  |
| P0C0L4 | 952  | DHBGBTLEIPGN | FALSE | TRUE | FALSE | 26.67 |
| P0C0L4 | 953  | HBGBTLEIPGNS | FALSE | TRUE | FALSE | 50.12 |
| P0C0L4 | 954  | BGBTLEIPGNSD | FALSE | TRUE | FALSE | 35.79 |
| P0C0L4 | 977  | YVBVTASDPLDT | FALSE | TRUE | FALSE | 11.25 |
| P0C0L4 | 1001 | ASLLBLPBGCGE | FALSE | TRUE | FALSE | 10.1  |
| P0C0L4 | 1002 | SLLBLPBGCGEQ | FALSE | TRUE | FALSE | 12.95 |
| P0C0L4 | 1003 | LLBLPBGCGEQT | FALSE | TRUE | FALSE | 16.12 |
| P0C0L4 | 1004 | LBLPBGCGEQTM | FALSE | TRUE | FALSE | 12.58 |
| P0C0L4 | 1005 | BLPBGCGEQTM  | FALSE | TRUE | FALSE | 12.57 |
| P0C0L4 | 1024 | ASBYLDKTEQWS | FALSE | TRUE | FALSE | 11.03 |
| P0C0L4 | 1052 | GYMBIQQFBKAD | FALSE | TRUE | FALSE | 10.07 |
| P0C0L4 | 1053 | YMBIQQFBKADG | FALSE | TRUE | FALSE | 20.96 |
| P0C0L4 | 1054 | MBIQQFBKADGS | FALSE | TRUE | FALSE | 24.7  |
| P0C0L4 | 1055 | BIQQFBKADGSY | FALSE | TRUE | FALSE | 16.69 |
| P0C0L4 | 1061 | KADGSYAAWLSB | FALSE | TRUE | FALSE | 13.53 |
| P0C0L4 | 1062 | ADGSYAAWLSBD | FALSE | TRUE | FALSE | 13.81 |
| P0C0L4 | 1063 | DGSYAAWLSBDS | FALSE | TRUE | FALSE | 11.73 |
| P0C0L4 | 1064 | GSYAAWLSBDSS | FALSE | TRUE | FALSE | 10.74 |
| P0C0L4 | 1065 | SYAAWLSBDSST | FALSE | TRUE | FALSE | 10.95 |
| P0C0L4 | 1066 | YAAWLSBDSSTW | FALSE | TRUE | FALSE | 12.57 |
| P0C0L4 | 1067 | AAWLSBDSSTWL | FALSE | TRUE | FALSE | 10.34 |
| P0C0L4 | 1281 | MADQASAWLTBQ | FALSE | TRUE | FALSE | 18.91 |
| P0C0L4 | 1282 | ADQASAWLTBQG | FALSE | TRUE | FALSE | 22.04 |
| P0C0L4 | 1283 | DQASAWLTBQGS | FALSE | TRUE | FALSE | 45.79 |
| P0C0L4 | 1284 | QASAWLTBQGSF | FALSE | TRUE | FALSE | 55.12 |
| P0C0L4 | 1285 | ASAWLTBQGSFQ | FALSE | TRUE | FALSE | 56.97 |
| P0C0L4 | 1286 | SAWLTBQGSFQG | FALSE | TRUE | FALSE | 64.46 |
| P0C0L4 | 1287 | AWLTBQGSFQGG | FALSE | TRUE | FALSE | 30.19 |
| P0C0L4 | 1288 | WLTBQGSFQGGF | FALSE | TRUE | FALSE | 37.62 |
| P0C0L4 | 1289 | LTBQGSFQGGFB | FALSE | TRUE | FALSE | 53.16 |
| P0C0L4 | 1290 | TBQGSFQGGFBS | FALSE | TRUE | FALSE | 40.71 |
| P0C0L4 | 1291 | BQGSFQGGFBST | FALSE | TRUE | FALSE | 35.89 |
| P0C0L4 | 1292 | QGSFQGGFBSTQ | FALSE | TRUE | FALSE | 22.05 |
| P0C0L4 | 1293 | GSFQGGFBSTQD | FALSE | TRUE | FALSE | 22.51 |
| P0C0L4 | 1294 | SFQGGFBSTQDT | FALSE | TRUE | FALSE | 26.13 |
| P0C0L4 | 1295 | FQGGFBSTQDTV | FALSE | TRUE | FALSE | 24.07 |
| P0C0L4 | 1296 | QGGFBSTQDTV  | FALSE | TRUE | FALSE | 22.16 |
| P0C0L4 | 1297 | GGFBSTQDTVIA | FALSE | TRUE | FALSE | 11.76 |
| P0C0L4 | 1325 | BGLNVTLSSTGB | FALSE | TRUE | FALSE | 17.79 |
| P0C0L4 | 1328 | NVTLSSTGBNGF | FALSE | TRUE | FALSE | 10.97 |
| P0C0L4 | 1330 | TLSTGBNGFKS  | FALSE | TRUE | FALSE | 14.74 |
| P0C0L4 | 1331 | LSSTGBNGFKSH | FALSE | TRUE | FALSE | 14.06 |
| P0C0L4 | 1332 | SSTGBNGFKSHA | FALSE | TRUE | FALSE | 19.44 |
| P0C0L4 | 1333 | STGBNGFKSHAL | FALSE | TRUE | FALSE | 16.76 |

|        |      |                |       |      |       |       |
|--------|------|----------------|-------|------|-------|-------|
| P0C0L4 | 1334 | TGBNGFKSHALQ   | FALSE | TRUE | FALSE | 16.17 |
| P0C0L4 | 1341 | SHALQLNNBQIB   | FALSE | TRUE | FALSE | 10.34 |
| P0C0L4 | 1342 | HALQLNNBQIBG   | FALSE | TRUE | FALSE | 31.14 |
| P0C0L4 | 1343 | ALQLNNBQIBGL   | FALSE | TRUE | FALSE | 36.54 |
| P0C0L4 | 1344 | LQLNNBQIBGLE   | FALSE | TRUE | FALSE | 48.81 |
| P0C0L4 | 1345 | QLNNBQIBGLEE   | FALSE | TRUE | FALSE | 52.18 |
| P0C0L4 | 1346 | LNNBQIBGLEEE   | FALSE | TRUE | FALSE | 52.96 |
| P0C0L4 | 1347 | NNBQIBGLEEEL   | FALSE | TRUE | FALSE | 47.07 |
| P0C0L4 | 1348 | NBQIBGLEEELQ   | FALSE | TRUE | FALSE | 31.78 |
| P0C0L4 | 1350 | QIBGLEEELQFS   | FALSE | TRUE | FALSE | 12.93 |
| P0C0L4 | 1351 | IBGLEEELQFSL   | FALSE | TRUE | FALSE | 12.8  |
| P0C0L4 | 1436 | QPVTPLQLFEGB   | FALSE | TRUE | FALSE | 11.88 |
| P0C0L4 | 1437 | PVTPLQLFEGBB   | FALSE | TRUE | FALSE | 16.36 |
| P0C0L4 | 1438 | VTPLQLFEGBBN   | FALSE | TRUE | FALSE | 26.21 |
| P0C0L4 | 1439 | TPLQLFEGBBNB   | FALSE | TRUE | FALSE | 26.6  |
| P0C0L4 | 1440 | PLQLFEGBBNBB   | FALSE | TRUE | FALSE | 10.61 |
| P0C0L4 | 1443 | LFEGBBNBBBBE   | FALSE | TRUE | FALSE | 13.58 |
| P0C0L4 | 1444 | FEGBBNBBBBEA   | FALSE | TRUE | FALSE | 14.13 |
| P0C0L4 | 1445 | EGBBNBBBBEAP   | FALSE | TRUE | FALSE | 17.31 |
| P0C0L4 | 1446 | GBBNBBBBEAPK   | FALSE | TRUE | FALSE | 33.62 |
| P0C0L4 | 1447 | BBNBBBBEAPKV   | FALSE | TRUE | FALSE | 39.18 |
| P0C0L4 | 1448 | BNBBBBEAPKVV   | FALSE | TRUE | FALSE | 49.38 |
| P0C0L4 | 1449 | NBBBBEAPKVVE   | FALSE | TRUE | FALSE | 40.55 |
| P0C0L4 | 1450 | BBBBEAPKVVEE   | FALSE | TRUE | FALSE | 34.78 |
| P0C0L4 | 1451 | BBBEAPKVVEEQ   | FALSE | TRUE | FALSE | 30.62 |
| P0C0L4 | 1452 | BBEAPKVVEEQE   | FALSE | TRUE | FALSE | 10.86 |
| P0C0L4 | 1471 | CIWBNGKVGLSG   | FALSE | TRUE | FALSE | 11.84 |
| P0C0L4 | 1492 | SGFHALBADLEK   | FALSE | TRUE | FALSE | 12.16 |
| P0C0L4 | 1494 | FHALBADLEKLT   | FALSE | TRUE | FALSE | 13.27 |
| P0C0L4 | 1523 | LLYFDSVPTSBE   | FALSE | TRUE | FALSE | 22.3  |
| P0C0L4 | 1524 | LYFDSVPTSBECE  | FALSE | TRUE | FALSE | 10.42 |
| P0C0L4 | 1525 | YFDSVPTSBECEV  | FALSE | TRUE | FALSE | 12.74 |
| P0C0L4 | 1528 | SVPTSBECEVGFE  | FALSE | TRUE | FALSE | 14.59 |
| P0C0L4 | 1531 | TSBECEVGFEAVQ  | FALSE | TRUE | FALSE | 10.18 |
| P0C0L4 | 1532 | SBCECEVGFEAVQE | FALSE | TRUE | FALSE | 10.94 |
| P0C0L4 | 1554 | ATLYDYNNPEBB   | FALSE | TRUE | FALSE | 10.71 |
| P0C0L4 | 1588 | CQCAEGKCPBQB   | FALSE | TRUE | FALSE | 19.24 |
| P0C0L4 | 1589 | QCAEGKCPBQBB   | FALSE | TRUE | FALSE | 15.44 |
| P0C0L4 | 1590 | CAEGKCPBQBBA   | FALSE | TRUE | FALSE | 15.19 |
| P0C0L4 | 1591 | AEGKCPBQBBALE  | FALSE | TRUE | FALSE | 15.8  |
| P0C0L4 | 1592 | EGKCPBQBBALEB  | FALSE | TRUE | FALSE | 11.49 |
| P0C0L4 | 1593 | GKCPBQBBALEBG  | FALSE | TRUE | FALSE | 11.42 |
| P0C0L4 | 1594 | KCPBQBBALEBGL  | FALSE | TRUE | FALSE | 13.4  |
| P0C0L4 | 1595 | CPBQBBALEBGLQ  | FALSE | TRUE | FALSE | 19.3  |
| P0C0L4 | 1596 | PBQBBALEBGLQD  | FALSE | TRUE | FALSE | 17.67 |
| P0C0L4 | 1597 | BQBBALEBGLQDE  | FALSE | TRUE | FALSE | 21.64 |
| P0C0L4 | 1598 | QBBALEBGLQDED  | FALSE | TRUE | FALSE | 19.92 |
| P0C0L4 | 1599 | BBALEBGLQDEDG  | FALSE | TRUE | FALSE | 14.73 |
| P0C0L4 | 1600 | BALEBGLQDEDGYB | FALSE | TRUE | FALSE | 12.52 |
| P0C0L4 | 1602 | LEBGLQDEDGYBM  | FALSE | TRUE | FALSE | 10.99 |
| P0C0L4 | 1603 | EBGLQDEDGYBMB  | FALSE | TRUE | FALSE | 14.61 |
| P0C0L4 | 1604 | BGLQDEDGYBMBK  | FALSE | TRUE | FALSE | 13.99 |

|        |      |               |       |      |       |       |
|--------|------|---------------|-------|------|-------|-------|
| P0C0L4 | 1623 | VEYGFQVKVLBE  | FALSE | TRUE | FALSE | 11.51 |
| P0C0L4 | 1625 | YGFQVKVLBEDS  | FALSE | TRUE | FALSE | 10.87 |
| P0C0L4 | 1626 | GFQVKVLBEDSB  | FALSE | TRUE | FALSE | 25.09 |
| P0C0L4 | 1627 | FQVKVLBEDSBA  | FALSE | TRUE | FALSE | 22.86 |
| P0C0L4 | 1628 | QVKVLBEDSBAA  | FALSE | TRUE | FALSE | 11.38 |
| P0C0L4 | 1629 | VKVLBEDSBAAF  | FALSE | TRUE | FALSE | 38.28 |
| P0C0L4 | 1630 | KVLBEDSBAAFBL | FALSE | TRUE | FALSE | 45.34 |
| P0C0L4 | 1631 | VLBEDSBAAFBL  | FALSE | TRUE | FALSE | 53.42 |
| P0C0L4 | 1632 | LBEDSBAAFBLF  | FALSE | TRUE | FALSE | 35.32 |
| P0C0L4 | 1633 | BEDSBAAFBLFE  | FALSE | TRUE | FALSE | 26.43 |
| P0C0L4 | 1634 | EDSBAAFBLFET  | FALSE | TRUE | FALSE | 14.77 |
| P0C0L4 | 1635 | DSBAAFBLFETK  | FALSE | TRUE | FALSE | 31.52 |
| P0C0L4 | 1636 | SBAAFBLFETKI  | FALSE | TRUE | FALSE | 13.5  |
| P0C0L4 | 1659 | AAANQMBNFLVB  | FALSE | TRUE | FALSE | 10.98 |
| P0C0L4 | 1661 | ANQMBNFLVBAS  | FALSE | TRUE | FALSE | 18.04 |
| P0C0L4 | 1663 | QMBNFLVBASCB  | FALSE | TRUE | FALSE | 20.87 |
| P0C0L4 | 1664 | MBNFLVBASCB   | FALSE | TRUE | FALSE | 17.3  |
| P0C0L4 | 1669 | VBASCBLBLEPG  | FALSE | TRUE | FALSE | 12.17 |
| P0C0L4 | 1670 | BASCBLBLEPGK  | FALSE | TRUE | FALSE | 16.52 |
| P0C0L4 | 1673 | CBLBLEPGKEYL  | FALSE | TRUE | FALSE | 13.22 |
| P0C0L4 | 1674 | BLBLEPGKEYLI  | FALSE | TRUE | FALSE | 14.72 |
| P0C0L4 | 1711 | EMPSEBLCBSTB  | FALSE | TRUE | FALSE | 10.42 |
| P0C0L4 | 1712 | MPSEBLCBSTBQ  | FALSE | TRUE | FALSE | 27.57 |
| P0C0L4 | 1713 | PSEBLCBSTBQB  | FALSE | TRUE | FALSE | 22.24 |
| P0C0L4 | 1714 | SEBLCBSTBQBA  | FALSE | TRUE | FALSE | 34.55 |
| P0C0L4 | 1715 | EBCBSTBQBAA   | FALSE | TRUE | FALSE | 12.69 |
| P0C0L4 | 1716 | BLCBSTBQBAAC  | FALSE | TRUE | FALSE | 38.38 |
| P0C0L4 | 1717 | LCBSTBQBAACA  | FALSE | TRUE | FALSE | 34.38 |
| P0C0L4 | 1718 | CBSTBQBAACAQ  | FALSE | TRUE | FALSE | 45.57 |
| P0C0L4 | 1719 | BSTBQBAACAQL  | FALSE | TRUE | FALSE | 53.78 |
| P0C0L4 | 1720 | STBQBAACAQLN  | FALSE | TRUE | FALSE | 28.3  |
| P0C0L4 | 1721 | TBQBAACAQLND  | FALSE | TRUE | FALSE | 18.44 |
| P0C0L4 | 1722 | BQBAACAQLNDF  | FALSE | TRUE | FALSE | 11.34 |
| P0C0L5 | 42   | QLQDVPBGQVVK  | FALSE | TRUE | FALSE | 11.24 |
| P0C0L5 | 43   | LQDVPBGQVVKG  | FALSE | TRUE | FALSE | 13.81 |
| P0C0L5 | 44   | QDVPBGQVVKGS  | FALSE | TRUE | FALSE | 13.93 |
| P0C0L5 | 45   | DVPBGQVVKGSV  | FALSE | TRUE | FALSE | 12.9  |
| P0C0L5 | 55   | SVFLBNPSBNNV  | FALSE | TRUE | FALSE | 13.27 |
| P0C0L5 | 58   | LBNPSBNNVPCS  | FALSE | TRUE | FALSE | 11.03 |
| P0C0L5 | 119  | DSLBTNNIQQGI  | FALSE | TRUE | FALSE | 10.43 |
| P0C0L5 | 120  | SLSBTNNIQQGIN | FALSE | TRUE | FALSE | 12.99 |
| P0C0L5 | 128  | QGINLLFSSBBG  | FALSE | TRUE | FALSE | 15.82 |
| P0C0L5 | 129  | GINLLFSSBBGH  | FALSE | TRUE | FALSE | 13.93 |
| P0C0L5 | 130  | INLLFSSBBGHL  | FALSE | TRUE | FALSE | 21.43 |
| P0C0L5 | 133  | LFSSBBGHLFLQ  | FALSE | TRUE | FALSE | 12.06 |
| P0C0L5 | 134  | FSSBBGHLFLQT  | FALSE | TRUE | FALSE | 25.01 |
| P0C0L5 | 135  | SSBBGHLFLQTD  | FALSE | TRUE | FALSE | 39.15 |
| P0C0L5 | 136  | SBBGHLFLQTDQ  | FALSE | TRUE | FALSE | 44.41 |
| P0C0L5 | 137  | BBGHLFLQTDQP  | FALSE | TRUE | FALSE | 22.67 |
| P0C0L5 | 147  | QPIYNPGQBVBVY | FALSE | TRUE | FALSE | 10.75 |
| P0C0L5 | 207  | ISEPGTWKISAB  | FALSE | TRUE | FALSE | 16.35 |
| P0C0L5 | 211  | GTWKISABFSDG  | FALSE | TRUE | FALSE | 12.83 |

|        |     |               |       |      |       |       |
|--------|-----|---------------|-------|------|-------|-------|
| P0C0L5 | 212 | TWKISABFSDGL  | FALSE | TRUE | FALSE | 11.57 |
| P0C0L5 | 213 | WKISABFSDGLE  | FALSE | TRUE | FALSE | 18.7  |
| P0C0L5 | 214 | KISABFSDGLES  | FALSE | TRUE | FALSE | 21.2  |
| P0C0L5 | 215 | ISABFSDGLESN  | FALSE | TRUE | FALSE | 21.81 |
| P0C0L5 | 216 | SABFSDGLESNS  | FALSE | TRUE | FALSE | 13.3  |
| P0C0L5 | 280 | AYVBFGLLDEDG  | FALSE | TRUE | FALSE | 15.33 |
| P0C0L5 | 281 | YVBFGLLDEDGK  | FALSE | TRUE | FALSE | 17.72 |
| P0C0L5 | 282 | VBFGLLDEDGKK  | FALSE | TRUE | FALSE | 10.64 |
| P0C0L5 | 287 | LDEDGKKTFFBG  | FALSE | TRUE | FALSE | 12.9  |
| P0C0L5 | 288 | DEDGKKTFFBGL  | FALSE | TRUE | FALSE | 16.74 |
| P0C0L5 | 289 | EDGKKTFFBGLE  | FALSE | TRUE | FALSE | 17.44 |
| P0C0L5 | 290 | DGKKTFFBGLES  | FALSE | TRUE | FALSE | 26.24 |
| P0C0L5 | 292 | KKTFFBGLESQT  | FALSE | TRUE | FALSE | 15.75 |
| P0C0L5 | 293 | KTFFBGLESQTK  | FALSE | TRUE | FALSE | 13.82 |
| P0C0L5 | 294 | TFFBGLESQTKL  | FALSE | TRUE | FALSE | 28.88 |
| P0C0L5 | 295 | FFBGLESQTKLV  | FALSE | TRUE | FALSE | 28.05 |
| P0C0L5 | 296 | FBGLESQTKLVN  | FALSE | TRUE | FALSE | 24.73 |
| P0C0L5 | 450 | AGSPHPAIABLT  | FALSE | TRUE | FALSE | 15.34 |
| P0C0L5 | 455 | PAIABLTVAAPP  | FALSE | TRUE | FALSE | 10.55 |
| P0C0L5 | 456 | AIABLTVAAPPS  | FALSE | TRUE | FALSE | 11.5  |
| P0C0L5 | 457 | IABLTVAAPPSG  | FALSE | TRUE | FALSE | 16.2  |
| P0C0L5 | 458 | ABLTVAAPPSGG  | FALSE | TRUE | FALSE | 11.19 |
| P0C0L5 | 505 | YYMILSBGQIV   | FALSE | TRUE | FALSE | 14.15 |
| P0C0L5 | 507 | YMILSBGQIVFM  | FALSE | TRUE | FALSE | 14.83 |
| P0C0L5 | 508 | MILSBGQIVFMN  | FALSE | TRUE | FALSE | 30.02 |
| P0C0L5 | 509 | ILSBGQIVFMNB  | FALSE | TRUE | FALSE | 29.96 |
| P0C0L5 | 510 | LSBGQIVFMNBE  | FALSE | TRUE | FALSE | 71.31 |
| P0C0L5 | 511 | SBGQIVFMNBEP  | FALSE | TRUE | FALSE | 55.99 |
| P0C0L5 | 512 | BGQIVFMNBEPK  | FALSE | TRUE | FALSE | 40.23 |
| P0C0L5 | 513 | GQIVFMNBEPKB  | FALSE | TRUE | FALSE | 25.16 |
| P0C0L5 | 514 | QIVFMNBEPKBT  | FALSE | TRUE | FALSE | 29.87 |
| P0C0L5 | 515 | IVFMNBEPKBTL  | FALSE | TRUE | FALSE | 21.61 |
| P0C0L5 | 516 | VFMNBEPKBTLT  | FALSE | TRUE | FALSE | 32.45 |
| P0C0L5 | 517 | FMNBEPKBTLTS  | FALSE | TRUE | FALSE | 34.04 |
| P0C0L5 | 518 | MNBEPKBTLTSV  | FALSE | TRUE | FALSE | 11.08 |
| P0C0L5 | 519 | NBEPKBTLTSVS  | FALSE | TRUE | FALSE | 10.54 |
| P0C0L5 | 574 | SVDGAKQYBNGE  | FALSE | TRUE | FALSE | 10.35 |
| P0C0L5 | 575 | VDGAKQYBNGES  | FALSE | TRUE | FALSE | 14.69 |
| P0C0L5 | 576 | DGAKQYBNGESV  | FALSE | TRUE | FALSE | 17.66 |
| P0C0L5 | 580 | QYBNGESVKLHL  | FALSE | TRUE | FALSE | 13.54 |
| P0C0L5 | 581 | YBNGESVKLHLE  | FALSE | TRUE | FALSE | 18.4  |
| P0C0L5 | 653 | AFSDGDQWTLNB  | FALSE | TRUE | FALSE | 10.28 |
| P0C0L5 | 654 | FSDGDQWTLNBK  | FALSE | TRUE | FALSE | 13.66 |
| P0C0L5 | 655 | SDGDQWTLNBKB  | FALSE | TRUE | FALSE | 25.16 |
| P0C0L5 | 656 | DGDQWTLNBKBL  | FALSE | TRUE | FALSE | 20.01 |
| P0C0L5 | 657 | GDQWTLNBKBLS  | FALSE | TRUE | FALSE | 16.21 |
| P0C0L5 | 658 | DQWTLNBKBLSC  | FALSE | TRUE | FALSE | 12.62 |
| P0C0L5 | 698 | TAKBCCQDGVTV  | FALSE | TRUE | FALSE | 14.11 |
| P0C0L5 | 699 | AKBCCQDGVTVBL | FALSE | TRUE | FALSE | 16.89 |
| P0C0L5 | 708 | TBLPMMBSCEQB  | FALSE | TRUE | FALSE | 10.11 |
| P0C0L5 | 712 | MMBSCEQBAABV  | FALSE | TRUE | FALSE | 11.73 |
| P0C0L5 | 713 | MBSCEQBAABVQ  | FALSE | TRUE | FALSE | 18.78 |

|        |      |              |       |      |       |       |
|--------|------|--------------|-------|------|-------|-------|
| P0C0L5 | 714  | BSCEQBAABVQQ | FALSE | TRUE | FALSE | 21.5  |
| P0C0L5 | 715  | SCEQBAABVQQP | FALSE | TRUE | FALSE | 15.79 |
| P0C0L5 | 716  | CEQBAABVQQPD | FALSE | TRUE | FALSE | 14.17 |
| P0C0L5 | 717  | EQBAABVQQPDC | FALSE | TRUE | FALSE | 11.92 |
| P0C0L5 | 718  | QBAABVQQPDCB | FALSE | TRUE | FALSE | 21.93 |
| P0C0L5 | 719  | BAABVQQPDCBE | FALSE | TRUE | FALSE | 19.09 |
| P0C0L5 | 720  | AABVQQPDCBEP | FALSE | TRUE | FALSE | 11.75 |
| P0C0L5 | 721  | ABVQQPDCBEPF | FALSE | TRUE | FALSE | 10.04 |
| P0C0L5 | 746  | SBDKQGAGLQBA | FALSE | TRUE | FALSE | 14.25 |
| P0C0L5 | 837  | LBLPMSVBBFEQ | FALSE | TRUE | FALSE | 13.64 |
| P0C0L5 | 838  | BLPMSVBBFEQL | FALSE | TRUE | FALSE | 17.54 |
| P0C0L5 | 839  | LPMSVBBFEQLE | FALSE | TRUE | FALSE | 15.87 |
| P0C0L5 | 841  | MSVBBFEQLELB | FALSE | TRUE | FALSE | 13.89 |
| P0C0L5 | 842  | SVBBFEQLELBP | FALSE | TRUE | FALSE | 18.59 |
| P0C0L5 | 843  | VBBFEQLELBPV | FALSE | TRUE | FALSE | 16.89 |
| P0C0L5 | 844  | BBFEQLELBPVL | FALSE | TRUE | FALSE | 22.18 |
| P0C0L5 | 909  | VSLKVVABGSFE | FALSE | TRUE | FALSE | 36.17 |
| P0C0L5 | 910  | SLKVVABGSFEF | FALSE | TRUE | FALSE | 23.1  |
| P0C0L5 | 911  | LKVVABGSFEFP | FALSE | TRUE | FALSE | 32.72 |
| P0C0L5 | 912  | KVVABGSFEFPV | FALSE | TRUE | FALSE | 46.32 |
| P0C0L5 | 913  | VVABGSFEFPVG | FALSE | TRUE | FALSE | 43.49 |
| P0C0L5 | 914  | VABGSFEFPVGD | FALSE | TRUE | FALSE | 34.99 |
| P0C0L5 | 915  | ABGSFEFPVGDA | FALSE | TRUE | FALSE | 23.93 |
| P0C0L5 | 916  | BGSFEFPVGDAV | FALSE | TRUE | FALSE | 10.6  |
| P0C0L5 | 935  | KEGAIHBEELVY | FALSE | TRUE | FALSE | 16.41 |
| P0C0L5 | 936  | EGAIHBEELVYE | FALSE | TRUE | FALSE | 11.26 |
| P0C0L5 | 938  | AIHBEELVYELN | FALSE | TRUE | FALSE | 14.46 |
| P0C0L5 | 944  | LVYELNPLDHBG | FALSE | TRUE | FALSE | 10.01 |
| P0C0L5 | 945  | VYELNPLDHBGB | FALSE | TRUE | FALSE | 17.36 |
| P0C0L5 | 946  | YELNPLDHBGBT | FALSE | TRUE | FALSE | 26.8  |
| P0C0L5 | 947  | ELNPLDHBGBTL | FALSE | TRUE | FALSE | 22.23 |
| P0C0L5 | 948  | LNPLDHBGBTLE | FALSE | TRUE | FALSE | 33.11 |
| P0C0L5 | 949  | NPLDHBGBTLEI | FALSE | TRUE | FALSE | 30.05 |
| P0C0L5 | 950  | PLDHBGBTLEIP | FALSE | TRUE | FALSE | 15.22 |
| P0C0L5 | 951  | LDHBGBTLEIPG | FALSE | TRUE | FALSE | 44.7  |
| P0C0L5 | 952  | DHBGBTLEIPGN | FALSE | TRUE | FALSE | 26.67 |
| P0C0L5 | 953  | HBGBTLEIPGNS | FALSE | TRUE | FALSE | 50.12 |
| P0C0L5 | 954  | BGBTLEIPGNSD | FALSE | TRUE | FALSE | 35.79 |
| P0C0L5 | 977  | YVBVTASDPLDT | FALSE | TRUE | FALSE | 11.25 |
| P0C0L5 | 1001 | ASLLBLPBGCGE | FALSE | TRUE | FALSE | 10.1  |
| P0C0L5 | 1002 | SLLBLPBGCGEQ | FALSE | TRUE | FALSE | 12.95 |
| P0C0L5 | 1003 | LLBLPBGCGEQT | FALSE | TRUE | FALSE | 16.12 |
| P0C0L5 | 1004 | LBLPBGCGEQTM | FALSE | TRUE | FALSE | 12.58 |
| P0C0L5 | 1005 | BLPBGCGEQTM  | FALSE | TRUE | FALSE | 12.57 |
| P0C0L5 | 1024 | ASBYLDKTEQWS | FALSE | TRUE | FALSE | 11.03 |
| P0C0L5 | 1052 | GYMBIQQFBKAD | FALSE | TRUE | FALSE | 10.07 |
| P0C0L5 | 1053 | YMBIQQFBKADG | FALSE | TRUE | FALSE | 20.96 |
| P0C0L5 | 1054 | MBIQQFBKADGS | FALSE | TRUE | FALSE | 24.7  |
| P0C0L5 | 1055 | BIQQFBKADGSY | FALSE | TRUE | FALSE | 16.69 |
| P0C0L5 | 1061 | KADGSYAAWLSB | FALSE | TRUE | FALSE | 13.53 |
| P0C0L5 | 1062 | ADGSYAAWLSBG | FALSE | TRUE | FALSE | 22.23 |
| P0C0L5 | 1063 | DGSYAAWLSBGS | FALSE | TRUE | FALSE | 31.36 |

|        |      |                         |       |      |       |       |
|--------|------|-------------------------|-------|------|-------|-------|
| P0C0L5 | 1064 | GSYAAWLSBGSS            | FALSE | TRUE | FALSE | 22.98 |
| P0C0L5 | 1065 | SYAAWLSBGSS             | FALSE | TRUE | FALSE | 23.7  |
| P0C0L5 | 1066 | YAAWLSBGSS              | FALSE | TRUE | FALSE | 19.73 |
| P0C0L5 | 1067 | AAWLSBGSS               | FALSE | TRUE | FALSE | 17.54 |
| P0C0L5 | 1068 | AWLSBGSS                | FALSE | TRUE | FALSE | 14.31 |
| P0C0L5 | 1069 | WLSBGSS                 | FALSE | TRUE | FALSE | 12.56 |
| P0C0L5 | 1070 | LSBGSS                  | FALSE | TRUE | FALSE | 13.3  |
| P0C0L5 | 1125 | HBSMQGGLVGND            | FALSE | TRUE | FALSE | 10.45 |
| P0C0L5 | 1205 | APADLBGVAHNN            | FALSE | TRUE | FALSE | 10.91 |
| P0C0L5 | 1208 | DLBGVAHNNLMA            | FALSE | TRUE | FALSE | 10.84 |
| P0C0L5 | 1281 | MADQAAAALTBQ            | FALSE | TRUE | FALSE | 18.63 |
| P0C0L5 | 1282 | ADQAAAALTBQG            | FALSE | TRUE | FALSE | 18.88 |
| P0C0L5 | 1283 | DQAAAALTBQGS            | FALSE | TRUE | FALSE | 40.15 |
| P0C0L5 | 1284 | QAAAALTBQGSF            | FALSE | TRUE | FALSE | 54.17 |
| P0C0L5 | 1285 | AAAALTBQGSFQ            | FALSE | TRUE | FALSE | 57.52 |
| P0C0L5 | 1286 | AAALTBQGSFQG            | FALSE | TRUE | FALSE | 63.45 |
| P0C0L5 | 1287 | AAALTBQGSFQGG           | FALSE | TRUE | FALSE | 30.19 |
| P0C0L5 | 1288 | AAALTBQGSFQGGF          | FALSE | TRUE | FALSE | 37.62 |
| P0C0L5 | 1289 | AAALTBQGSFQGGFB         | FALSE | TRUE | FALSE | 53.16 |
| P0C0L5 | 1290 | AAALTBQGSFQGGFBS        | FALSE | TRUE | FALSE | 40.71 |
| P0C0L5 | 1291 | AAALTBQGSFQGGFBST       | FALSE | TRUE | FALSE | 35.89 |
| P0C0L5 | 1292 | AAALTBQGSFQGGFBSTQ      | FALSE | TRUE | FALSE | 22.05 |
| P0C0L5 | 1293 | AAALTBQGSFQGGFBSTQD     | FALSE | TRUE | FALSE | 22.51 |
| P0C0L5 | 1294 | AAALTBQGSFQGGFBSTQDT    | FALSE | TRUE | FALSE | 26.13 |
| P0C0L5 | 1295 | AAALTBQGSFQGGFBSTQDTV   | FALSE | TRUE | FALSE | 24.07 |
| P0C0L5 | 1296 | AAALTBQGSFQGGFBSTQDTV   | FALSE | TRUE | FALSE | 22.16 |
| P0C0L5 | 1297 | AAALTBQGSFQGGFBSTQDTVIA | FALSE | TRUE | FALSE | 11.76 |
| P0C0L5 | 1325 | BGLNVTLSSTGB            | FALSE | TRUE | FALSE | 17.79 |
| P0C0L5 | 1328 | NVTLSSTGBNGF            | FALSE | TRUE | FALSE | 10.97 |
| P0C0L5 | 1330 | TLSSSTGBNGFKS           | FALSE | TRUE | FALSE | 14.74 |
| P0C0L5 | 1331 | LSSTGBNGFKSH            | FALSE | TRUE | FALSE | 14.06 |
| P0C0L5 | 1332 | SSTGBNGFKSHA            | FALSE | TRUE | FALSE | 19.44 |
| P0C0L5 | 1333 | STGBNGFKSHAL            | FALSE | TRUE | FALSE | 16.76 |
| P0C0L5 | 1334 | TGBNGFKSHALQ            | FALSE | TRUE | FALSE | 16.17 |
| P0C0L5 | 1341 | SHALQLNNBQIB            | FALSE | TRUE | FALSE | 10.34 |
| P0C0L5 | 1342 | HALQLNNBQIBG            | FALSE | TRUE | FALSE | 31.14 |
| P0C0L5 | 1343 | ALQLNNBQIBGL            | FALSE | TRUE | FALSE | 36.54 |
| P0C0L5 | 1344 | LQLNNBQIBGLE            | FALSE | TRUE | FALSE | 48.81 |
| P0C0L5 | 1345 | QLNNBQIBGLEE            | FALSE | TRUE | FALSE | 52.18 |
| P0C0L5 | 1346 | LNNBQIBGLEEE            | FALSE | TRUE | FALSE | 52.96 |
| P0C0L5 | 1347 | NNBQIBGLEEEEL           | FALSE | TRUE | FALSE | 47.07 |
| P0C0L5 | 1348 | NBQIBGLEEEELQ           | FALSE | TRUE | FALSE | 31.78 |
| P0C0L5 | 1350 | QIBGLEEEELQFS           | FALSE | TRUE | FALSE | 12.93 |
| P0C0L5 | 1351 | IBGLEEEELQFSL           | FALSE | TRUE | FALSE | 12.8  |
| P0C0L5 | 1436 | QPVTPLQLFEGB            | FALSE | TRUE | FALSE | 11.88 |
| P0C0L5 | 1437 | PVTPLQLFEGBB            | FALSE | TRUE | FALSE | 16.36 |
| P0C0L5 | 1438 | VTPLQLFEGBBN            | FALSE | TRUE | FALSE | 26.21 |
| P0C0L5 | 1439 | TPLQLFEGBBNB            | FALSE | TRUE | FALSE | 26.6  |
| P0C0L5 | 1440 | PLQLFEGBBNBB            | FALSE | TRUE | FALSE | 10.61 |
| P0C0L5 | 1443 | LFEGBBNBBB              | FALSE | TRUE | FALSE | 13.58 |
| P0C0L5 | 1444 | FEGBBNBBB               | FALSE | TRUE | FALSE | 14.13 |
| P0C0L5 | 1445 | EGBBNBBB                | FALSE | TRUE | FALSE | 17.31 |

|        |      |               |       |      |       |       |
|--------|------|---------------|-------|------|-------|-------|
| P0C0L5 | 1446 | GBBNBBBBEAPK  | FALSE | TRUE | FALSE | 33.62 |
| P0C0L5 | 1447 | BBNBBBBEAPKV  | FALSE | TRUE | FALSE | 39.18 |
| P0C0L5 | 1448 | BNBBBBEAPKV   | FALSE | TRUE | FALSE | 49.38 |
| P0C0L5 | 1449 | NBBBBEAPKVVE  | FALSE | TRUE | FALSE | 40.55 |
| P0C0L5 | 1450 | BBBBEAPKVVEE  | FALSE | TRUE | FALSE | 34.78 |
| P0C0L5 | 1451 | BBBEAPKVVEEQ  | FALSE | TRUE | FALSE | 30.62 |
| P0C0L5 | 1452 | BBEAPKVVEEQE  | FALSE | TRUE | FALSE | 10.86 |
| P0C0L5 | 1471 | CIWBNGKVGLSG  | FALSE | TRUE | FALSE | 11.84 |
| P0C0L5 | 1492 | SGFHALBADLEK  | FALSE | TRUE | FALSE | 12.16 |
| P0C0L5 | 1494 | FHALBADLEKLT  | FALSE | TRUE | FALSE | 13.27 |
| P0C0L5 | 1523 | LLYFDSVPTSBE  | FALSE | TRUE | FALSE | 22.3  |
| P0C0L5 | 1524 | LYFDSVPTSBE   | FALSE | TRUE | FALSE | 10.42 |
| P0C0L5 | 1525 | YFDSVPTSBE    | FALSE | TRUE | FALSE | 12.74 |
| P0C0L5 | 1528 | SVPTSBE       | FALSE | TRUE | FALSE | 14.59 |
| P0C0L5 | 1531 | TSBE          | FALSE | TRUE | FALSE | 10.18 |
| P0C0L5 | 1532 | SBEC          | FALSE | TRUE | FALSE | 10.94 |
| P0C0L5 | 1554 | ATLYDY        | FALSE | TRUE | FALSE | 10.71 |
| P0C0L5 | 1588 | CQCAEGKCPBQB  | FALSE | TRUE | FALSE | 19.24 |
| P0C0L5 | 1589 | QCAEGKCPBQBB  | FALSE | TRUE | FALSE | 15.44 |
| P0C0L5 | 1590 | CAEGKCPBQBBA  | FALSE | TRUE | FALSE | 15.19 |
| P0C0L5 | 1591 | AEGKCPBQB     | FALSE | TRUE | FALSE | 15.8  |
| P0C0L5 | 1592 | EGKCPBQB      | FALSE | TRUE | FALSE | 11.49 |
| P0C0L5 | 1593 | GKCPBQB       | FALSE | TRUE | FALSE | 11.42 |
| P0C0L5 | 1594 | KCPBQB        | FALSE | TRUE | FALSE | 13.4  |
| P0C0L5 | 1595 | CPBQB         | FALSE | TRUE | FALSE | 19.3  |
| P0C0L5 | 1596 | PBQB          | FALSE | TRUE | FALSE | 17.67 |
| P0C0L5 | 1597 | BQB           | FALSE | TRUE | FALSE | 21.64 |
| P0C0L5 | 1598 | QB            | FALSE | TRUE | FALSE | 19.92 |
| P0C0L5 | 1599 | BBALE         | FALSE | TRUE | FALSE | 14.73 |
| P0C0L5 | 1600 | BALE          | FALSE | TRUE | FALSE | 12.52 |
| P0C0L5 | 1602 | LEBGLQ        | FALSE | TRUE | FALSE | 10.99 |
| P0C0L5 | 1603 | EBGLQ         | FALSE | TRUE | FALSE | 14.61 |
| P0C0L5 | 1604 | BGLQ          | FALSE | TRUE | FALSE | 13.99 |
| P0C0L5 | 1623 | VEYGFQVKVLBE  | FALSE | TRUE | FALSE | 11.51 |
| P0C0L5 | 1625 | YGFQVKVLBEDS  | FALSE | TRUE | FALSE | 10.87 |
| P0C0L5 | 1626 | GFQVKVLBEDSB  | FALSE | TRUE | FALSE | 25.09 |
| P0C0L5 | 1627 | FQVKVLBEDSBA  | FALSE | TRUE | FALSE | 22.86 |
| P0C0L5 | 1628 | QVKVLBEDSBAA  | FALSE | TRUE | FALSE | 11.38 |
| P0C0L5 | 1629 | VKVLBEDSBAAF  | FALSE | TRUE | FALSE | 38.28 |
| P0C0L5 | 1630 | KVLBEDSBAAF   | FALSE | TRUE | FALSE | 45.34 |
| P0C0L5 | 1631 | VLBEDSBAAFBL  | FALSE | TRUE | FALSE | 53.42 |
| P0C0L5 | 1632 | LBEDSBAAFBLF  | FALSE | TRUE | FALSE | 35.32 |
| P0C0L5 | 1633 | BEDSBAAFBLFE  | FALSE | TRUE | FALSE | 26.43 |
| P0C0L5 | 1634 | EDSBAAFBLFET  | FALSE | TRUE | FALSE | 14.77 |
| P0C0L5 | 1635 | DSBAAAFBLFETK | FALSE | TRUE | FALSE | 31.52 |
| P0C0L5 | 1636 | SBAAAFBLFETKI | FALSE | TRUE | FALSE | 13.5  |
| P0C0L5 | 1659 | AAANQMBNFLVB  | FALSE | TRUE | FALSE | 10.98 |
| P0C0L5 | 1661 | ANQMBNFLVBAS  | FALSE | TRUE | FALSE | 18.04 |
| P0C0L5 | 1663 | QMBNFLVBASCB  | FALSE | TRUE | FALSE | 20.87 |
| P0C0L5 | 1664 | MBNFLVBASCBL  | FALSE | TRUE | FALSE | 17.3  |
| P0C0L5 | 1669 | VBASCBLBLEPG  | FALSE | TRUE | FALSE | 12.17 |
| P0C0L5 | 1670 | BASCBLBLEPGK  | FALSE | TRUE | FALSE | 16.52 |



|        |      |              |       |      |       |       |
|--------|------|--------------|-------|------|-------|-------|
| P0C0L5 | 1673 | CBLBLEPGKEYL | FALSE | TRUE | FALSE | 13.22 |
| P0C0L5 | 1674 | BLBLEPGKEYLI | FALSE | TRUE | FALSE | 14.72 |
| P0C0L5 | 1711 | EMPSEBLCBSTB | FALSE | TRUE | FALSE | 10.42 |
| P0C0L5 | 1712 | MPSEBLCBSTBQ | FALSE | TRUE | FALSE | 27.57 |
| P0C0L5 | 1713 | PSEBLCBSTBQB | FALSE | TRUE | FALSE | 22.24 |
| P0C0L5 | 1714 | SEBLCBSTBQBA | FALSE | TRUE | FALSE | 34.55 |
| P0C0L5 | 1715 | EBLCBSTBQBAA | FALSE | TRUE | FALSE | 12.69 |
| P0C0L5 | 1716 | BLCBSTBQBAAC | FALSE | TRUE | FALSE | 38.38 |
| P0C0L5 | 1717 | LCBSTBQBAACA | FALSE | TRUE | FALSE | 34.38 |
| P0C0L5 | 1718 | CBSTBQBAACAQ | FALSE | TRUE | FALSE | 45.57 |
| P0C0L5 | 1719 | BSTBQBAACAQL | FALSE | TRUE | FALSE | 53.78 |
| P0C0L5 | 1720 | STBQBAACAQLN | FALSE | TRUE | FALSE | 28.3  |
| P0C0L5 | 1721 | TBQBAACAQLND | FALSE | TRUE | FALSE | 18.44 |
| P0C0L5 | 1722 | BQBAACAQLNDF | FALSE | TRUE | FALSE | 11.34 |
| P01031 | 26   | SAPKIFBVGASE | FALSE | TRUE | FALSE | 10.5  |
| P01031 | 27   | APKIFBVGASEN | FALSE | TRUE | FALSE | 12.53 |
| P01031 | 28   | PKIFBVGASENI | FALSE | TRUE | FALSE | 14.08 |
| P01031 | 29   | KIFBVGASENIV | FALSE | TRUE | FALSE | 18.28 |
| P01031 | 114  | SKBMPITYDNGF | FALSE | TRUE | FALSE | 10.42 |
| P01031 | 150  | DDLKPAKBETVL | FALSE | TRUE | FALSE | 16.74 |
| P01031 | 151  | DLKPAKBETVLT | FALSE | TRUE | FALSE | 25.9  |
| P01031 | 152  | LKPAKBETVLT  | FALSE | TRUE | FALSE | 12.01 |
| P01031 | 265  | VYITFGIBEDLK | FALSE | TRUE | FALSE | 24.36 |
| P01031 | 266  | YITFGIBEDLKD | FALSE | TRUE | FALSE | 39.51 |
| P01031 | 267  | ITFGIBEDLKDD | FALSE | TRUE | FALSE | 37.74 |
| P01031 | 268  | TFGIBEDLKDDQ | FALSE | TRUE | FALSE | 35.58 |
| P01031 | 269  | FGIBEDLKDDQK | FALSE | TRUE | FALSE | 27.3  |
| P01031 | 442  | LPEENQABEGYB | FALSE | TRUE | FALSE | 20.88 |
| P01031 | 443  | PEENQABEGYBA | FALSE | TRUE | FALSE | 10.17 |
| P01031 | 444  | EENQABEGYBAI | FALSE | TRUE | FALSE | 24.43 |
| P01031 | 445  | ENQABEGYBAIA | FALSE | TRUE | FALSE | 22.62 |
| P01031 | 446  | NQABEGYBAIAY | FALSE | TRUE | FALSE | 22.2  |
| P01031 | 447  | QABEGYBAIAYS | FALSE | TRUE | FALSE | 42.23 |
| P01031 | 448  | ABEGYBAIAYSS | FALSE | TRUE | FALSE | 29.97 |
| P01031 | 449  | BEGYBAIAYSSL | FALSE | TRUE | FALSE | 11.43 |
| P01031 | 505  | SKGKIIHFGTBE | FALSE | TRUE | FALSE | 20.24 |
| P01031 | 508  | KIIHFGTBEKFS | FALSE | TRUE | FALSE | 11.2  |
| P01031 | 509  | IIHFGTBEKFSD | FALSE | TRUE | FALSE | 33.29 |
| P01031 | 510  | IHFGTBEKFSDA | FALSE | TRUE | FALSE | 31.02 |
| P01031 | 511  | HFGTBEKFSDAS | FALSE | TRUE | FALSE | 33.3  |
| P01031 | 512  | FGTBEKFSDASY | FALSE | TRUE | FALSE | 19.41 |
| P01031 | 513  | GTBEKFSDASYQ | FALSE | TRUE | FALSE | 21.09 |
| P01031 | 514  | TBEKFSDASYQS | FALSE | TRUE | FALSE | 17.8  |
| P01031 | 604  | AVDSAVYGVQBG | FALSE | TRUE | FALSE | 14.84 |
| P01031 | 605  | VDSAVYGVQBGA | FALSE | TRUE | FALSE | 22.4  |
| P01031 | 606  | DSAVYGVQBGAK | FALSE | TRUE | FALSE | 21.17 |
| P01031 | 610  | YGVQBGAKKPLE | FALSE | TRUE | FALSE | 14.23 |
| P01031 | 611  | GVQBGAKKPLEB | FALSE | TRUE | FALSE | 11.39 |
| P01031 | 612  | VQBGAKKPLEBV | FALSE | TRUE | FALSE | 11.87 |
| P01031 | 613  | QBGAKKPLEBVF | FALSE | TRUE | FALSE | 19.72 |
| P01031 | 669  | CKEILBPBTLQ  | FALSE | TRUE | FALSE | 12.35 |
| P01031 | 673  | LBPBTLQKKIE  | FALSE | TRUE | FALSE | 14.57 |

|        |      |              |       |      |       |       |
|--------|------|--------------|-------|------|-------|-------|
| P01031 | 674  | BPBBLQKKIEE  | FALSE | TRUE | FALSE | 19.16 |
| P01031 | 675  | PBBLQKKIEEI  | FALSE | TRUE | FALSE | 22.02 |
| P01031 | 676  | BBTLQKKIEEIA | FALSE | TRUE | FALSE | 11.54 |
| P01031 | 707  | NDETCEQBAABI | FALSE | TRUE | FALSE | 11.44 |
| P01031 | 708  | DETCEQBAABIS | FALSE | TRUE | FALSE | 10.33 |
| P01031 | 709  | ETCEQBAABISL | FALSE | TRUE | FALSE | 14.81 |
| P01031 | 710  | TCEQBAABISLG | FALSE | TRUE | FALSE | 21.16 |
| P01031 | 711  | CEQBAABISLGP | FALSE | TRUE | FALSE | 24.17 |
| P01031 | 712  | EQBAABISLGPB | FALSE | TRUE | FALSE | 29.9  |
| P01031 | 713  | QBAABISLGPBC | FALSE | TRUE | FALSE | 31.78 |
| P01031 | 714  | BAABISLGPBCI | FALSE | TRUE | FALSE | 17.81 |
| P01031 | 737  | QLBANISHKDMQ | FALSE | TRUE | FALSE | 12.84 |
| P01031 | 826  | EMNIPYSVVBGE | FALSE | TRUE | FALSE | 11.26 |
| P01031 | 827  | MNIPYSVVBGEQ | FALSE | TRUE | FALSE | 20.62 |
| P01031 | 828  | NIPYSVVBGEQI | FALSE | TRUE | FALSE | 17.72 |
| P01031 | 829  | IPYSVVBGEQIQ | FALSE | TRUE | FALSE | 18.99 |
| P01031 | 830  | PYSVVBGEQIQL | FALSE | TRUE | FALSE | 16.22 |
| P01031 | 831  | YSVVBGEQIQLK | FALSE | TRUE | FALSE | 27.19 |
| P01031 | 832  | SVVBGEQIQLKG | FALSE | TRUE | FALSE | 17.1  |
| P01031 | 833  | VVBGEQIQLKGT | FALSE | TRUE | FALSE | 18.7  |
| P01031 | 834  | VBGEQIQLKGTV | FALSE | TRUE | FALSE | 20.87 |
| P01031 | 835  | BGEQIQLKGTVY | FALSE | TRUE | FALSE | 12.5  |
| P01031 | 843  | GTVYNYBTSGMQ | FALSE | TRUE | FALSE | 12.83 |
| P01031 | 881  | SKCVBQKVEGSS | FALSE | TRUE | FALSE | 11.35 |
| P01031 | 882  | KCVBQKVEGSSS | FALSE | TRUE | FALSE | 13.73 |
| P01031 | 883  | CVBQKVEGSSSH | FALSE | TRUE | FALSE | 12.51 |
| P01031 | 928  | BVVPEGVKBESY | FALSE | TRUE | FALSE | 17.11 |
| P01031 | 929  | VVPEGVKBESYS | FALSE | TRUE | FALSE | 15.71 |
| P01031 | 930  | VPEGVKBESYSG | FALSE | TRUE | FALSE | 22.52 |
| P01031 | 931  | PEGVKBESYSGV | FALSE | TRUE | FALSE | 16.26 |
| P01031 | 932  | EGVKBESYSGVT | FALSE | TRUE | FALSE | 14.79 |
| P01031 | 933  | GVKBESYSGVTL | FALSE | TRUE | FALSE | 18.5  |
| P01031 | 934  | VKBESYSGVTLD | FALSE | TRUE | FALSE | 17.55 |
| P01031 | 935  | KBESYSGVTLDP | FALSE | TRUE | FALSE | 14.97 |
| P01031 | 936  | BESYSGVTLDPB | FALSE | TRUE | FALSE | 13.12 |
| P01031 | 941  | GVTLDPBGIYGT | FALSE | TRUE | FALSE | 10.51 |
| P01031 | 944  | LDPBGIYGTISB | FALSE | TRUE | FALSE | 21.26 |
| P01031 | 945  | DPBGIYGTISBB | FALSE | TRUE | FALSE | 35.91 |
| P01031 | 946  | PBGIYGTISBBK | FALSE | TRUE | FALSE | 16.1  |
| P01031 | 947  | BGIYGTISBBKE | FALSE | TRUE | FALSE | 47.36 |
| P01031 | 948  | GIYGTISBBKEF | FALSE | TRUE | FALSE | 22.79 |
| P01031 | 949  | IYGTISBBKEFP | FALSE | TRUE | FALSE | 30.55 |
| P01031 | 950  | YGTISBBKEFPY | FALSE | TRUE | FALSE | 41.68 |
| P01031 | 951  | GTISBBKEFPYB | FALSE | TRUE | FALSE | 44.3  |
| P01031 | 952  | TISBBKEFPYBI | FALSE | TRUE | FALSE | 33.2  |
| P01031 | 953  | ISBBKEFPYBIP | FALSE | TRUE | FALSE | 26.54 |
| P01031 | 954  | SBBKEFPYBIPL | FALSE | TRUE | FALSE | 25.58 |
| P01031 | 955  | BBKEFPYBIPLD | FALSE | TRUE | FALSE | 17.37 |
| P01031 | 956  | BKEFPYBIPLDL | FALSE | TRUE | FALSE | 14.04 |
| P01031 | 1054 | LSIMSYBNADYS | FALSE | TRUE | FALSE | 12.58 |
| P01031 | 1055 | SIMSYBNADYSY | FALSE | TRUE | FALSE | 10.35 |
| P01031 | 1056 | IMSYBNADYSYS | FALSE | TRUE | FALSE | 11.5  |

|        |      |              |       |      |       |       |
|--------|------|--------------|-------|------|-------|-------|
| P01031 | 1135 | VEABENSLYLTA | FALSE | TRUE | FALSE | 11.27 |
| P01031 | 1149 | VIGIBKAFDICP | FALSE | TRUE | FALSE | 10.74 |
| P01031 | 1150 | IGIBKAFDICPL | FALSE | TRUE | FALSE | 10.91 |
| P01031 | 1204 | QFBSIVSALKBE | FALSE | TRUE | FALSE | 18.83 |
| P01031 | 1205 | FBSIVSALKBEA | FALSE | TRUE | FALSE | 19.02 |
| P01031 | 1206 | BSIVSALKBEAL | FALSE | TRUE | FALSE | 20.12 |
| P01031 | 1207 | SIVSALKBEALV | FALSE | TRUE | FALSE | 18.79 |
| P01031 | 1277 | EQBYGGGFYSTQ | FALSE | TRUE | FALSE | 11.11 |
| P01031 | 1383 | TQDIEASHYBGY | FALSE | TRUE | FALSE | 12.18 |
| P01031 | 1386 | IEASHYBGYGNS | FALSE | TRUE | FALSE | 14.71 |
| P01031 | 1387 | EASHYBGYGNSD | FALSE | TRUE | FALSE | 21.36 |
| P01031 | 1390 | HYBGYGNSDYKB | FALSE | TRUE | FALSE | 11.62 |
| P01031 | 1391 | YBGYGNSDYKBI | FALSE | TRUE | FALSE | 20.23 |
| P01031 | 1392 | BGYGNSDYKBIV | FALSE | TRUE | FALSE | 17.4  |
| P01031 | 1402 | IVACASYKPSBE | FALSE | TRUE | FALSE | 12.5  |
| P01031 | 1407 | SYKPSBEESSSG | FALSE | TRUE | FALSE | 10.33 |
| P01031 | 1540 | DLTISAETBKQT | FALSE | TRUE | FALSE | 11.47 |
| P01031 | 1541 | LTISAETBKQTA | FALSE | TRUE | FALSE | 11.16 |
| P01031 | 1545 | AETBKQTACKPE | FALSE | TRUE | FALSE | 10.37 |
| P01031 | 1604 | VTCTNAELVKGB | FALSE | TRUE | FALSE | 13.54 |
| P01031 | 1605 | TCTNAELVKGBQ | FALSE | TRUE | FALSE | 13.43 |
| P01031 | 1606 | CTNAELVKGBQY | FALSE | TRUE | FALSE | 10.96 |
| P01031 | 1607 | TNAELVKGBQYL | FALSE | TRUE | FALSE | 15.16 |
| P01031 | 1610 | ELVKGBQYLIMG | FALSE | TRUE | FALSE | 12.03 |
| P01031 | 1614 | GBQYLIMGKEAL | FALSE | TRUE | FALSE | 15.92 |
| P13671 | 35   | CSKTCNSGTQSB | FALSE | TRUE | FALSE | 11.72 |
| P13671 | 38   | TCNSGTQSBHBQ | FALSE | TRUE | FALSE | 34.09 |
| P13671 | 39   | CNSGTQSBHBQI | FALSE | TRUE | FALSE | 38.53 |
| P13671 | 40   | NSGTQSBHBQIV | FALSE | TRUE | FALSE | 27.83 |
| P13671 | 41   | SGTQSBHBQIVV | FALSE | TRUE | FALSE | 25.03 |
| P13671 | 42   | GTQSBHBQIVVD | FALSE | TRUE | FALSE | 37.21 |
| P13671 | 44   | QSBHBQIVVDKY | FALSE | TRUE | FALSE | 11.22 |
| P13671 | 65   | CSKQETBECNWQ | FALSE | TRUE | FALSE | 10.13 |
| P13671 | 66   | SKQETBECNWQB | FALSE | TRUE | FALSE | 14.97 |
| P13671 | 67   | KQETBECNWQBC | FALSE | TRUE | FALSE | 12.18 |
| P13671 | 68   | QETBECNWQBCP | FALSE | TRUE | FALSE | 10.29 |
| P13671 | 69   | ETBECNWQBCPI | FALSE | TRUE | FALSE | 13.14 |
| P13671 | 70   | TBECNWQBCPIN | FALSE | TRUE | FALSE | 15.65 |
| P13671 | 139  | DCKNKFBCDSGB | FALSE | TRUE | FALSE | 25.04 |
| P13671 | 140  | CKNKFBCDSGBC | FALSE | TRUE | FALSE | 15.52 |
| P13671 | 143  | KFBCDSGBCIAB | FALSE | TRUE | FALSE | 21.58 |
| P13671 | 144  | FBCDSGBCIABK | FALSE | TRUE | FALSE | 29.68 |
| P13671 | 145  | BCDSGBCIABKL | FALSE | TRUE | FALSE | 17.08 |
| P13671 | 148  | SGBCIABKLECN | FALSE | TRUE | FALSE | 14.65 |
| P13671 | 149  | GBCIABKLECN  | FALSE | TRUE | FALSE | 16    |
| P13671 | 152  | IABKLECNEND  | FALSE | TRUE | FALSE | 10.11 |
| P13671 | 171  | BDCGBTKAVCTB | FALSE | TRUE | FALSE | 24.12 |
| P13671 | 203  | EPBGEVLDNSFT | FALSE | TRUE | FALSE | 12.38 |
| P13671 | 204  | PBGEVLDNSFTG | FALSE | TRUE | FALSE | 14.48 |
| P13671 | 205  | BGEVLDNSFTGG | FALSE | TRUE | FALSE | 10.74 |
| P13671 | 285  | YSSKBSENINHN | FALSE | TRUE | FALSE | 11.99 |
| P13671 | 345  | LPLEYNSALYSB | FALSE | TRUE | FALSE | 14.76 |

|        |     |               |       |      |       |       |
|--------|-----|---------------|-------|------|-------|-------|
| P13671 | 437 | AEKSISLIBGGB  | FALSE | TRUE | FALSE | 15.12 |
| P13671 | 438 | EKSISLIBGGBS  | FALSE | TRUE | FALSE | 26.93 |
| P13671 | 439 | KSISLIBGGBSE  | FALSE | TRUE | FALSE | 41.72 |
| P13671 | 440 | SISLIBGGBSEY  | FALSE | TRUE | FALSE | 37.41 |
| P13671 | 441 | ISLIBGGBSEYG  | FALSE | TRUE | FALSE | 41.79 |
| P13671 | 442 | SLIBGGBSEYGA  | FALSE | TRUE | FALSE | 36.9  |
| P13671 | 444 | IBGGBSEYGAAL  | FALSE | TRUE | FALSE | 32.7  |
| P13671 | 445 | BGGBSEYGAALA  | FALSE | TRUE | FALSE | 25.24 |
| P13671 | 493 | LVBNI PCAVTKB | FALSE | TRUE | FALSE | 10.53 |
| P13671 | 494 | VBNIPCAVTKBN  | FALSE | TRUE | FALSE | 16.63 |
| P13671 | 497 | IPCAVTKBNNLB  | FALSE | TRUE | FALSE | 14.22 |
| P13671 | 520 | PCQCAPCPNNGB  | FALSE | TRUE | FALSE | 10.24 |
| P13671 | 572 | SSWSTCDATYKB  | FALSE | TRUE | FALSE | 14.38 |
| P13671 | 573 | SWSTCDATYKBS  | FALSE | TRUE | FALSE | 12.62 |
| P13671 | 574 | WSTCDATYKBSB  | FALSE | TRUE | FALSE | 22.51 |
| P13671 | 575 | STCDATYKBSBT  | FALSE | TRUE | FALSE | 19.86 |
| P13671 | 576 | TCDATYKBSBTB  | FALSE | TRUE | FALSE | 27.84 |
| P13671 | 577 | CDATYKBSBTBE  | FALSE | TRUE | FALSE | 51.12 |
| P13671 | 578 | DATYKBSBTBEC  | FALSE | TRUE | FALSE | 33.48 |
| P13671 | 579 | ATYKBSBTBECN  | FALSE | TRUE | FALSE | 42.35 |
| P13671 | 580 | TYKBSBTBECNN  | FALSE | TRUE | FALSE | 50.71 |
| P13671 | 581 | YKBSBTBECNNP  | FALSE | TRUE | FALSE | 52.3  |
| P13671 | 582 | KBSBTBECNNPA  | FALSE | TRUE | FALSE | 22.34 |
| P13671 | 583 | BSBTBECNNPAP  | FALSE | TRUE | FALSE | 21.91 |
| P13671 | 584 | SBTBECNNPAPQ  | FALSE | TRUE | FALSE | 24.51 |
| P13671 | 585 | BTBECNNPAPQB  | FALSE | TRUE | FALSE | 31.13 |
| P13671 | 586 | TBECNNPAPQBG  | FALSE | TRUE | FALSE | 22.18 |
| P13671 | 589 | CNNPAPQBGGKB  | FALSE | TRUE | FALSE | 22.26 |
| P13671 | 590 | NNPAPQBGGKBC  | FALSE | TRUE | FALSE | 20.49 |
| P13671 | 591 | NPAPQBGGKBCE  | FALSE | TRUE | FALSE | 22.83 |
| P13671 | 592 | PAPQBGGKBCEG  | FALSE | TRUE | FALSE | 19.79 |
| P13671 | 593 | APQBGGKBCEGE  | FALSE | TRUE | FALSE | 23.4  |
| P13671 | 594 | PQBGGKBCEGEK  | FALSE | TRUE | FALSE | 28.7  |
| P13671 | 595 | QBGGKBCEGEKB  | FALSE | TRUE | FALSE | 35.59 |
| P13671 | 596 | BGGKBCEGEKBQ  | FALSE | TRUE | FALSE | 31.34 |
| P13671 | 597 | GGKBCEGEKBQE  | FALSE | TRUE | FALSE | 11.97 |
| P13671 | 598 | GKBCEGEKBQEE  | FALSE | TRUE | FALSE | 10.1  |
| P13671 | 604 | EKBQEEDCTFSI  | FALSE | TRUE | FALSE | 10.21 |
| P13671 | 605 | KBQEEDCTFSIM  | FALSE | TRUE | FALSE | 10.74 |
| P13671 | 646 | QPVPPENGFIBN  | FALSE | TRUE | FALSE | 11.23 |
| P13671 | 651 | ENGFIBNEKQLY  | FALSE | TRUE | FALSE | 14.52 |
| P13671 | 655 | IBNEKQLYLVGE  | FALSE | TRUE | FALSE | 13.22 |
| P13671 | 683 | YFBCLPDGTWBQ  | FALSE | TRUE | FALSE | 15.16 |
| P13671 | 684 | FBCLPDGTWBQG  | FALSE | TRUE | FALSE | 15.35 |
| P13671 | 687 | LPDGTWBQGDVE  | FALSE | TRUE | FALSE | 14.96 |
| P13671 | 690 | GTWBQGDVECQB  | FALSE | TRUE | FALSE | 14.87 |
| P13671 | 691 | TWBQGDVECQBT  | FALSE | TRUE | FALSE | 16.88 |
| P13671 | 692 | WBQGDVECQBTE  | FALSE | TRUE | FALSE | 13.72 |
| P13671 | 718 | FQBLYBIGESIE  | FALSE | TRUE | FALSE | 16.6  |
| P13671 | 719 | QBLYBIGESIEL  | FALSE | TRUE | FALSE | 21.02 |
| P13671 | 720 | BLYBIGESIET   | FALSE | TRUE | FALSE | 15.82 |
| P13671 | 838 | QDGBQLEWGLEB  | FALSE | TRUE | FALSE | 17.73 |

|        |     |              |       |      |       |       |
|--------|-----|--------------|-------|------|-------|-------|
| P13671 | 839 | DGBQLEWGLEBT | FALSE | TRUE | FALSE | 18.83 |
| P13671 | 840 | GBQLEWGLEBTB | FALSE | TRUE | FALSE | 31.39 |
| P13671 | 841 | BQLEWGLEBTBL | FALSE | TRUE | FALSE | 21.8  |
| P13671 | 842 | QLEWGLEBTBLS | FALSE | TRUE | FALSE | 14.59 |
| P13671 | 843 | LEWGLEBTBLSS | FALSE | TRUE | FALSE | 15.71 |
| P13671 | 844 | EWGLEBTBLSSN | FALSE | TRUE | FALSE | 18.41 |
| P13671 | 845 | WGLEBTBLSSNS | FALSE | TRUE | FALSE | 23.26 |
| P13671 | 846 | GLEBTBLSSNST | FALSE | TRUE | FALSE | 17.36 |
| P13671 | 847 | LEBTBLSSNSTK | FALSE | TRUE | FALSE | 21.28 |
| P13671 | 912 | CEVGTIBCANK  | FALSE | TRUE | FALSE | 10.77 |
| P13671 | 916 | TIBCANKMEIL  | FALSE | TRUE | FALSE | 10.25 |
| P13671 | 918 | BCANKMEILHP  | FALSE | TRUE | FALSE | 14.77 |
| P10643 | 37  | SECNGCTKTQTB | FALSE | TRUE | FALSE | 15.35 |
| P10643 | 38  | ECNGCTKTQTB  | FALSE | TRUE | FALSE | 27.38 |
| P10643 | 39  | CNGCTKTQTB   | FALSE | TRUE | FALSE | 12.25 |
| P10643 | 40  | NGCTKTQTB    | FALSE | TRUE | FALSE | 16.57 |
| P10643 | 41  | GCTKTQTB     | FALSE | TRUE | FALSE | 16.03 |
| P10643 | 42  | CTKTQTB      | FALSE | TRUE | FALSE | 12.15 |
| P10643 | 43  | TKTQTB       | FALSE | TRUE | FALSE | 20.17 |
| P10643 | 45  | TQTB         | FALSE | TRUE | FALSE | 12.82 |
| P10643 | 46  | QTBB         | FALSE | TRUE | FALSE | 17.56 |
| P10643 | 47  | TBB          | FALSE | TRUE | FALSE | 10.47 |
| P10643 | 48  | BB           | FALSE | TRUE | FALSE | 10.62 |
| P10643 | 69  | ETQSCEPTBGCP | FALSE | TRUE | FALSE | 10.91 |
| P10643 | 70  | TQSCEPTBGCPT | FALSE | TRUE | FALSE | 17.46 |
| P10643 | 71  | QSCEPTBGCPT  | FALSE | TRUE | FALSE | 13.33 |
| P10643 | 72  | SCEPTBGCPT   | FALSE | TRUE | FALSE | 11.81 |
| P10643 | 73  | CEPTBGCPT    | FALSE | TRUE | FALSE | 15.36 |
| P10643 | 142 | NGYNELTGQFBN | FALSE | TRUE | FALSE | 10.96 |
| P10643 | 143 | GYNELTGQFBN  | FALSE | TRUE | FALSE | 41.71 |
| P10643 | 144 | YNELTGQFBN   | FALSE | TRUE | FALSE | 36.82 |
| P10643 | 145 | NELTGQFBN    | FALSE | TRUE | FALSE | 21.67 |
| P10643 | 146 | ELTGQFBN     | FALSE | TRUE | FALSE | 19.81 |
| P10643 | 147 | LTGQFBN      | FALSE | TRUE | FALSE | 34.6  |
| P10643 | 148 | TGQFBN       | FALSE | TRUE | FALSE | 15.26 |
| P10643 | 149 | GQFBN        | FALSE | TRUE | FALSE | 12.11 |
| P10643 | 150 | QFBN         | FALSE | TRUE | FALSE | 11.35 |
| P10643 | 167 | KVFSGDGKDFYB | FALSE | TRUE | FALSE | 15.25 |
| P10643 | 170 | SGDGKDFYB    | FALSE | TRUE | FALSE | 15.18 |
| P10643 | 171 | GDGKDFYB     | FALSE | TRUE | FALSE | 13.22 |
| P10643 | 172 | DGKDFYB      | FALSE | TRUE | FALSE | 11.59 |
| P10643 | 209 | KHTSTEHTSSSB | FALSE | TRUE | FALSE | 10.14 |
| P10643 | 211 | TSTEHTSSSB   | FALSE | TRUE | FALSE | 20.5  |
| P10643 | 212 | STEHTSSSB    | FALSE | TRUE | FALSE | 16.8  |
| P10643 | 213 | TEHTSSSB     | FALSE | TRUE | FALSE | 11.14 |
| P10643 | 222 | BSFFBSSSSSB  | FALSE | TRUE | FALSE | 15.56 |
| P10643 | 223 | SFFBSSSSSSB  | FALSE | TRUE | FALSE | 10.41 |
| P10643 | 283 | LPSLYDYSAYBB | FALSE | TRUE | FALSE | 14.13 |
| P10643 | 287 | YDYSAYBBLIDQ | FALSE | TRUE | FALSE | 13.73 |
| P10643 | 289 | YSAYBBLIDQY  | FALSE | TRUE | FALSE | 10.12 |
| P10643 | 290 | SAYBBLIDQYGT | FALSE | TRUE | FALSE | 16.34 |
| P10643 | 291 | AYBBLIDQYGT  | FALSE | TRUE | FALSE | 11.79 |

|        |     |              |       |      |       |       |
|--------|-----|--------------|-------|------|-------|-------|
| P10643 | 364 | SGTQNNVLBGEP | FALSE | TRUE | FALSE | 10.77 |
| P10643 | 365 | GTQNNVLBGEPF | FALSE | TRUE | FALSE | 15.3  |
| P10643 | 366 | TQNNVLBGEPFI | FALSE | TRUE | FALSE | 10.8  |
| P10643 | 367 | QNNVLBGEPFIB | FALSE | TRUE | FALSE | 20.29 |
| P10643 | 368 | NNVLBGEPFIBG | FALSE | TRUE | FALSE | 21.02 |
| P10643 | 369 | NVLBGEPFIBGG | FALSE | TRUE | FALSE | 11.87 |
| P10643 | 372 | BGEPFIBGGGAG | FALSE | TRUE | FALSE | 13.08 |
| P10643 | 373 | GEPFIBGGGAGF | FALSE | TRUE | FALSE | 17.93 |
| P10643 | 374 | EPFIBGGGAGFI | FALSE | TRUE | FALSE | 13.52 |
| P10643 | 375 | PFIBGGGAGFIS | FALSE | TRUE | FALSE | 10.06 |
| P10643 | 376 | FIBGGGAGFISG | FALSE | TRUE | FALSE | 15.54 |
| P10643 | 377 | IBGGGAGFISGL | FALSE | TRUE | FALSE | 18.56 |
| P10643 | 391 | LELDNPAGNKBB | FALSE | TRUE | FALSE | 11.39 |
| P10643 | 392 | ELDNPAGNKBBY | FALSE | TRUE | FALSE | 10.23 |
| P10643 | 393 | LDNPAGNKBBYS | FALSE | TRUE | FALSE | 12.03 |
| P10643 | 394 | DNPAGNKBBYSA | FALSE | TRUE | FALSE | 10.9  |
| P10643 | 397 | AGNKBBYSAWAE | FALSE | TRUE | FALSE | 15.67 |
| P10643 | 398 | GNKBBYSAWAES | FALSE | TRUE | FALSE | 15.65 |
| P10643 | 399 | NKBBYSAWAESV | FALSE | TRUE | FALSE | 10.58 |
| P10643 | 400 | KBBYSAWAESVT | FALSE | TRUE | FALSE | 14.39 |
| P10643 | 401 | BBYSAWAESVTN | FALSE | TRUE | FALSE | 11.19 |
| P10643 | 512 | CVQGKKTBSBEC | FALSE | TRUE | FALSE | 29.41 |
| P10643 | 517 | KTBSBECNNPPP | FALSE | TRUE | FALSE | 11.78 |
| P10643 | 518 | TBSBECNNPPPS | FALSE | TRUE | FALSE | 25.59 |
| P10643 | 519 | BSBECNNPPPSG | FALSE | TRUE | FALSE | 19.1  |
| P10643 | 522 | ECNNPPPSGGGB | FALSE | TRUE | FALSE | 10.07 |
| P10643 | 523 | CNNPPPSGGGBS | FALSE | TRUE | FALSE | 13.61 |
| P10643 | 701 | KCQBWEKLQNSB | FALSE | TRUE | FALSE | 19.3  |
| P10643 | 702 | CQBWEKLQNSBC | FALSE | TRUE | FALSE | 15.11 |
| P10643 | 703 | QBWEKLQNSBCV | FALSE | TRUE | FALSE | 24.08 |
| P10643 | 726 | DVCAQDEBSKBI | FALSE | TRUE | FALSE | 11.43 |
| P10643 | 727 | VCAQDEBSKBIL | FALSE | TRUE | FALSE | 10.38 |
| P10643 | 749 | HCQGBNYTLTGB | FALSE | TRUE | FALSE | 22.12 |
| P10643 | 750 | CQGBNYTLTGBD | FALSE | TRUE | FALSE | 15.92 |
| P10643 | 751 | QGBNYTLTGBDS | FALSE | TRUE | FALSE | 22.17 |
| P10643 | 752 | GBNYTLTGBDSC | FALSE | TRUE | FALSE | 14.03 |
| P10643 | 753 | BNYTLTGBDSCT | FALSE | TRUE | FALSE | 11.96 |
| P10643 | 818 | CEAGALBCBGQS | FALSE | TRUE | FALSE | 10.29 |
| P10643 | 819 | EAGALBCBGQSI | FALSE | TRUE | FALSE | 14.54 |
| P10643 | 820 | AGALBCBGQSS  | FALSE | TRUE | FALSE | 22.32 |
| P10643 | 821 | GALBCBGQSSIV | FALSE | TRUE | FALSE | 19.4  |
| P10643 | 822 | ALBCBGQSSIVT | FALSE | TRUE | FALSE | 20.92 |
| P10643 | 823 | LBCBGQSSIVTS | FALSE | TRUE | FALSE | 16.59 |
| P10643 | 824 | BCBGQSSIVTSI | FALSE | TRUE | FALSE | 10.68 |
| P10643 | 825 | CBGQSSIVTSIB | FALSE | TRUE | FALSE | 10.26 |
| P07357 | 24  | VNQBVBBAATPA | FALSE | TRUE | FALSE | 14.24 |
| P07357 | 25  | NQBVBBAATPAA | FALSE | TRUE | FALSE | 11.01 |
| P07357 | 26  | QBVBBAATPAAV | FALSE | TRUE | FALSE | 21.8  |
| P07357 | 27  | BVBBAATPAAVT | FALSE | TRUE | FALSE | 42.17 |
| P07357 | 28  | VBBAATPAAVTC | FALSE | TRUE | FALSE | 13.77 |
| P07357 | 29  | BBAATPAAVTCQ | FALSE | TRUE | FALSE | 10.68 |
| P07357 | 49  | DCFPCQDKKYBH | FALSE | TRUE | FALSE | 10.66 |

|        |     |               |       |      |       |       |
|--------|-----|---------------|-------|------|-------|-------|
| P07357 | 50  | CFPCQDKKYBHB  | FALSE | TRUE | FALSE | 18.6  |
| P07357 | 51  | FPCQDKKYBHBS  | FALSE | TRUE | FALSE | 12.57 |
| P07357 | 53  | CQDKKYBHBSLL  | FALSE | TRUE | FALSE | 17.43 |
| P07357 | 54  | QDKKYBHBSLLQ  | FALSE | TRUE | FALSE | 12.35 |
| P07357 | 55  | DKKYBHBSLLQP  | FALSE | TRUE | FALSE | 14.62 |
| P07357 | 86  | SSTTCVBQAQCG  | FALSE | TRUE | FALSE | 12.64 |
| P07357 | 87  | STTCVBQAQCGQ  | FALSE | TRUE | FALSE | 12.97 |
| P07357 | 100 | FQCKETGBCLKB  | FALSE | TRUE | FALSE | 10.94 |
| P07357 | 101 | QCKETGBCLKBH  | FALSE | TRUE | FALSE | 13.97 |
| P07357 | 104 | ETGBCLKBHLVC  | FALSE | TRUE | FALSE | 13.2  |
| P07357 | 105 | TGBCLKBHLVCN  | FALSE | TRUE | FALSE | 13.33 |
| P07357 | 106 | GBCLKBHLVCNG  | FALSE | TRUE | FALSE | 10.69 |
| P07357 | 107 | BCLKBHLVCNGD  | FALSE | TRUE | FALSE | 14.51 |
| P07357 | 109 | LKBHLVCNGDQD  | FALSE | TRUE | FALSE | 11.05 |
| P07357 | 179 | TVYNGEWBELBY  | FALSE | TRUE | FALSE | 13.43 |
| P07357 | 180 | VYNGEWBELBYD  | FALSE | TRUE | FALSE | 13.88 |
| P07357 | 181 | YNGEWBELBYDS  | FALSE | TRUE | FALSE | 16.45 |
| P07357 | 182 | NGEWBELBYDST  | FALSE | TRUE | FALSE | 18.54 |
| P07357 | 185 | WBELBYDSTCEB  | FALSE | TRUE | FALSE | 13.36 |
| P07357 | 186 | BELBYDSTCEBL  | FALSE | TRUE | FALSE | 17.31 |
| P07357 | 200 | GDDEKYFBKPYN  | FALSE | TRUE | FALSE | 12.59 |
| P07357 | 300 | HFKMBKDDIMLD  | FALSE | TRUE | FALSE | 10.03 |
| P07357 | 301 | FKMBKDDIMLDE  | FALSE | TRUE | FALSE | 13.23 |
| P07357 | 406 | KTEBABKAMAVE  | FALSE | TRUE | FALSE | 22.02 |
| P07357 | 407 | TEBABKAMAVED  | FALSE | TRUE | FALSE | 16.33 |
| P07357 | 408 | EBABKAMAVEDI  | FALSE | TRUE | FALSE | 16.94 |
| P07357 | 409 | BABKAMAVEDII  | FALSE | TRUE | FALSE | 17.81 |
| P07357 | 416 | VEDIISBVBGGSS | FALSE | TRUE | FALSE | 22.11 |
| P07357 | 417 | EDIISBVBGGSS  | FALSE | TRUE | FALSE | 31.9  |
| P07357 | 418 | DIISBVBGGSSG  | FALSE | TRUE | FALSE | 41.41 |
| P07357 | 419 | IISBVBGGSSGW  | FALSE | TRUE | FALSE | 42.3  |
| P07357 | 420 | ISBVBGGSSGWS  | FALSE | TRUE | FALSE | 48.37 |
| P07357 | 421 | SBVBGGSSGWSG  | FALSE | TRUE | FALSE | 44.54 |
| P07357 | 422 | BVBGGSSGWSGC  | FALSE | TRUE | FALSE | 16.86 |
| P07357 | 423 | VBBGGSSGWSGGL | FALSE | TRUE | FALSE | 16.69 |
| P07357 | 424 | BGGSSGWSGGLA  | FALSE | TRUE | FALSE | 11.82 |
| P07357 | 427 | SSGWSGGLAQNB  | FALSE | TRUE | FALSE | 11.15 |
| P07357 | 428 | SGWSGGLAQNB   | FALSE | TRUE | FALSE | 12.44 |
| P07357 | 429 | GWSGGLAQNBST  | FALSE | TRUE | FALSE | 14.56 |
| P07357 | 430 | WSGGLAQNBSTI  | FALSE | TRUE | FALSE | 19.39 |
| P07357 | 431 | SGGLAQNBSTIT  | FALSE | TRUE | FALSE | 10.79 |
| P07357 | 432 | GGLAQNBSTITY  | FALSE | TRUE | FALSE | 10.95 |
| P07357 | 433 | GLAQNBSTITYB  | FALSE | TRUE | FALSE | 19.8  |
| P07357 | 434 | LAQNBSTITYBS  | FALSE | TRUE | FALSE | 27.86 |
| P07357 | 438 | BSTITYBSWGBS  | FALSE | TRUE | FALSE | 11.38 |
| P07357 | 465 | HEVLBHTSLGPL  | FALSE | TRUE | FALSE | 11.1  |
| P07357 | 466 | EVLBHTSLGPLE  | FALSE | TRUE | FALSE | 14.29 |
| P07357 | 467 | VLBHTSLGPLEA  | FALSE | TRUE | FALSE | 14.79 |
| P07357 | 468 | LBHTSLGPLEAK  | FALSE | TRUE | FALSE | 16.93 |
| P07357 | 469 | BHTSLGPLEAKB  | FALSE | TRUE | FALSE | 21.88 |
| P07357 | 472 | SLGPLEAKBQNL  | FALSE | TRUE | FALSE | 12.13 |
| P07357 | 473 | LGPLEAKBQNLB  | FALSE | TRUE | FALSE | 20.74 |

|        |     |              |       |      |       |       |
|--------|-----|--------------|-------|------|-------|-------|
| P07357 | 474 | GPLEAKBQNLBB | FALSE | TRUE | FALSE | 19.6  |
| P07357 | 476 | LEAKBQNLBBAL | FALSE | TRUE | FALSE | 30.64 |
| P07357 | 477 | EAKBQNLBBALD | FALSE | TRUE | FALSE | 27.94 |
| P07357 | 478 | AKBQNLBBALDQ | FALSE | TRUE | FALSE | 10.49 |
| P07357 | 479 | KBQNLBBALDQY | FALSE | TRUE | FALSE | 14.33 |
| P07357 | 480 | BQNLBBALDQYL | FALSE | TRUE | FALSE | 37.13 |
| P07357 | 481 | QNLBBALDQYLM | FALSE | TRUE | FALSE | 14.26 |
| P07357 | 482 | NLBBALDQYLME | FALSE | TRUE | FALSE | 13.79 |
| P07357 | 483 | LBBALDQYLMEF | FALSE | TRUE | FALSE | 11.01 |
| P07357 | 547 | SWSVCBAGIQEB | FALSE | TRUE | FALSE | 10.67 |
| P07357 | 548 | WSVCBAGIQEBB | FALSE | TRUE | FALSE | 14.78 |
| P07357 | 550 | VCBAGIQEBBBE | FALSE | TRUE | FALSE | 12.55 |
| P07357 | 551 | CBAGIQEBBBEC | FALSE | TRUE | FALSE | 25.49 |
| P07357 | 552 | BAGIQEBBBECD | FALSE | TRUE | FALSE | 18.73 |
| P07357 | 553 | AGIQEBBBECDN | FALSE | TRUE | FALSE | 13.47 |
| P07357 | 554 | GIQEBBBECDNP | FALSE | TRUE | FALSE | 13.76 |
| P07357 | 555 | IQEBBBECDNPA | FALSE | TRUE | FALSE | 18.84 |
| P07357 | 556 | QEBBBECDNPAP | FALSE | TRUE | FALSE | 10.89 |
| P07357 | 557 | EBBBECDNPAPQ | FALSE | TRUE | FALSE | 18.39 |
| P07357 | 558 | BBECDNPAPQN  | FALSE | TRUE | FALSE | 28.81 |
| P07357 | 559 | BBECDNPAPQNG | FALSE | TRUE | FALSE | 14.44 |
| P07357 | 566 | APQNGGASCPGB | FALSE | TRUE | FALSE | 10.77 |
| P07358 | 4   | SBTAWABAPVEL | FALSE | TRUE | FALSE | 15.47 |
| P07358 | 21  | ALGCLSLPGSBG | FALSE | TRUE | FALSE | 15.15 |
| P07358 | 22  | LGCLSLPGSBGE | FALSE | TRUE | FALSE | 17.79 |
| P07358 | 23  | GCLSLPGSBGEB | FALSE | TRUE | FALSE | 20.39 |
| P07358 | 24  | CLSLPGSBGEBP | FALSE | TRUE | FALSE | 15.87 |
| P07358 | 25  | LSLPGSBGEBPH | FALSE | TRUE | FALSE | 15.4  |
| P07358 | 26  | SLPGSBGEBPHS | FALSE | TRUE | FALSE | 19    |
| P07358 | 27  | LPGSBGEBPHSF | FALSE | TRUE | FALSE | 20.51 |
| P07358 | 28  | PGSBGEBPHSFG | FALSE | TRUE | FALSE | 15.55 |
| P07358 | 29  | GSBGEBPHSFGS | FALSE | TRUE | FALSE | 21.02 |
| P07358 | 30  | SBGEBPHSFGSN | FALSE | TRUE | FALSE | 22.47 |
| P07358 | 31  | BGEBPHSFGSNA | FALSE | TRUE | FALSE | 13.09 |
| P07358 | 46  | SFAKSBQMBSVD | FALSE | TRUE | FALSE | 34.61 |
| P07358 | 47  | FAKSBQMBSVDV | FALSE | TRUE | FALSE | 49.81 |
| P07358 | 48  | AKSBQMBSVDVT | FALSE | TRUE | FALSE | 25.27 |
| P07358 | 49  | KSBQMBSVDVTL | FALSE | TRUE | FALSE | 30.03 |
| P07358 | 50  | SBQMBSVDVTLM | FALSE | TRUE | FALSE | 24.69 |
| P07358 | 51  | BQMBSVDVTLMP | FALSE | TRUE | FALSE | 13.65 |
| P07358 | 121 | BCEGFVCAQTGB | FALSE | TRUE | FALSE | 12.62 |
| P07358 | 155 | CBBIYKKCQHEM | FALSE | TRUE | FALSE | 15.69 |
| P07358 | 206 | LNTBFBKPYNVE | FALSE | TRUE | FALSE | 26.72 |
| P07358 | 208 | TBFBKPYNVEY  | FALSE | TRUE | FALSE | 11.28 |
| P07358 | 268 | ISSQSDBGKHYI | FALSE | TRUE | FALSE | 11.39 |
| P07358 | 269 | SSQSDBGKHYIB | FALSE | TRUE | FALSE | 22.02 |
| P07358 | 270 | SQSDBGKHYIBB | FALSE | TRUE | FALSE | 30.95 |
| P07358 | 271 | QSDBGKHYIBBT | FALSE | TRUE | FALSE | 49.39 |
| P07358 | 272 | SDBGKHYIBBTK | FALSE | TRUE | FALSE | 19    |
| P07358 | 273 | DBGKHYIBBTKB | FALSE | TRUE | FALSE | 27.67 |
| P07358 | 274 | BGKHYIBBTKBF | FALSE | TRUE | FALSE | 12.24 |
| P07358 | 275 | GKHYIBBTKBFS | FALSE | TRUE | FALSE | 11.09 |



|        |     |              |       |      |       |       |
|--------|-----|--------------|-------|------|-------|-------|
| P07358 | 276 | KHYIBBTKBFSH | FALSE | TRUE | FALSE | 11.19 |
| P07358 | 277 | HYIBBTKBFSHT | FALSE | TRUE | FALSE | 13.33 |
| P07358 | 289 | KSVFLHABSDLE | FALSE | TRUE | FALSE | 11.03 |
| P07358 | 290 | SVFLHABSDLEV | FALSE | TRUE | FALSE | 11.91 |
| P07358 | 291 | VFLHABSDLEVA | FALSE | TRUE | FALSE | 11.39 |
| P07358 | 292 | FLHABSDLEVAH | FALSE | TRUE | FALSE | 14.73 |
| P07358 | 294 | HABSDLEVAHYK | FALSE | TRUE | FALSE | 17.78 |
| P07358 | 295 | ABSDLEVAHYKL | FALSE | TRUE | FALSE | 13.84 |
| P07358 | 316 | EFLQBVKBLPLE | FALSE | TRUE | FALSE | 22.3  |
| P07358 | 317 | FLQBVKBLPLEY | FALSE | TRUE | FALSE | 10.76 |
| P07358 | 318 | LQBVKBLPLEYS | FALSE | TRUE | FALSE | 11.86 |
| P07358 | 319 | QBVKBLPLEYSY | FALSE | TRUE | FALSE | 15.04 |
| P07358 | 320 | BVKBLPLEYSYG | FALSE | TRUE | FALSE | 12.57 |
| P07358 | 329 | SYGEYBDLFBDF | FALSE | TRUE | FALSE | 10.91 |
| P07358 | 330 | YGEYBDLFBDFG | FALSE | TRUE | FALSE | 10.52 |
| P07358 | 331 | GEYBDLFBDFGT | FALSE | TRUE | FALSE | 10.85 |
| P07358 | 364 | AMEBGDYTLNNV | FALSE | TRUE | FALSE | 12.8  |
| P07358 | 398 | VSVGKCBGILNE | FALSE | TRUE | FALSE | 13.41 |
| P07358 | 402 | KCBGILNEIKDB | FALSE | TRUE | FALSE | 12.55 |
| P07358 | 403 | CBGILNEIKDBN | FALSE | TRUE | FALSE | 23.2  |
| P07358 | 406 | ILNEIKDBNKBD | FALSE | TRUE | FALSE | 11.45 |
| P07358 | 407 | LNEIKDBNKBDT | FALSE | TRUE | FALSE | 12.86 |
| P07358 | 409 | EIKDBNKBDTMV | FALSE | TRUE | FALSE | 11.17 |
| P07358 | 410 | IKDBNKBDTMVE | FALSE | TRUE | FALSE | 10.98 |
| P07358 | 413 | BNKBDTMVEDLV | FALSE | TRUE | FALSE | 10.15 |
| P07358 | 422 | DLVVLVBGGASE | FALSE | TRUE | FALSE | 12.38 |
| P07358 | 423 | LVVLVBGGASEH | FALSE | TRUE | FALSE | 17.76 |
| P07358 | 424 | VVLVBGGASEHI | FALSE | TRUE | FALSE | 28.44 |
| P07358 | 425 | VLVBGGASEHIT | FALSE | TRUE | FALSE | 29.85 |
| P07358 | 426 | LVBGGASEHITT | FALSE | TRUE | FALSE | 21.15 |
| P07358 | 427 | VBGGASEHITTL | FALSE | TRUE | FALSE | 17.9  |
| P07358 | 476 | ATDFAYSSTVBQ | FALSE | TRUE | FALSE | 11.32 |
| P07358 | 482 | SSTVBQNMKQAL | FALSE | TRUE | FALSE | 11.43 |
| P07358 | 483 | STVBQNMKQALE | FALSE | TRUE | FALSE | 28.19 |
| P07358 | 484 | TVBQNMKQALEE | FALSE | TRUE | FALSE | 31.75 |
| P07358 | 485 | VBQNMKQALEEF | FALSE | TRUE | FALSE | 12.03 |
| P07358 | 486 | BQNMKQALEEFQ | FALSE | TRUE | FALSE | 12.57 |
| P07358 | 529 | SQGLACEVSYBK | FALSE | TRUE | FALSE | 11.95 |
| P07358 | 532 | LACEVSYBKNTF | FALSE | TRUE | FALSE | 10.75 |
| P07358 | 550 | CWSNWSSCSGGB | FALSE | TRUE | FALSE | 13.51 |
| P07358 | 552 | SNWSSCSGGBKT | FALSE | TRUE | FALSE | 11.35 |
| P07358 | 553 | NWSSCSGGBKTB | FALSE | TRUE | FALSE | 28.7  |
| P07358 | 554 | WSSCSGGBKTBQ | FALSE | TRUE | FALSE | 37.9  |
| P07358 | 555 | SSCSGGBKTBQB | FALSE | TRUE | FALSE | 43.36 |
| P07358 | 556 | SCSGGBKTBQBQ | FALSE | TRUE | FALSE | 43    |
| P07358 | 557 | CSGGBKTBQBQC | FALSE | TRUE | FALSE | 52.82 |
| P07358 | 558 | SGBBKTBQBQCN | FALSE | TRUE | FALSE | 25.17 |
| P07358 | 559 | GBBKTBQBQCNN | FALSE | TRUE | FALSE | 22.99 |
| P07358 | 560 | BBKTBQBQCNNP | FALSE | TRUE | FALSE | 18.86 |
| P07358 | 561 | BKTBQBQCNNPP | FALSE | TRUE | FALSE | 22.85 |
| P07358 | 563 | TBQBQCNNPPPQ | FALSE | TRUE | FALSE | 36.7  |
| P07358 | 564 | BQBQCNNPPPQN | FALSE | TRUE | FALSE | 22.43 |

|        |     |              |       |      |       |       |
|--------|-----|--------------|-------|------|-------|-------|
| P07358 | 565 | QBQCNNPPPQNG | FALSE | TRUE | FALSE | 10.56 |
| P07360 | 89  | FBKLDGICWQVB | FALSE | TRUE | FALSE | 10.31 |
| P07360 | 90  | BKLDGICWQVBQ | FALSE | TRUE | FALSE | 19.01 |
| P07360 | 97  | WQVBQLYGDTGV | FALSE | TRUE | FALSE | 13.88 |
| P07360 | 98  | QVBQLYGDTGVL | FALSE | TRUE | FALSE | 20.5  |
| P07360 | 99  | VBQLYGDTGVLG | FALSE | TRUE | FALSE | 10.52 |
| P07360 | 100 | BQLYGDTGVLGB | FALSE | TRUE | FALSE | 10.57 |
| P07360 | 109 | LGBFLLQABDAB | FALSE | TRUE | FALSE | 10.15 |
| P07360 | 110 | GBFLLQABDABG | FALSE | TRUE | FALSE | 15.4  |
| P07360 | 111 | BFLLQABDABGA | FALSE | TRUE | FALSE | 19.59 |
| P07360 | 112 | FLLQABDABGAV | FALSE | TRUE | FALSE | 25.91 |
| P07360 | 113 | LLQABDABGAVH | FALSE | TRUE | FALSE | 41.41 |
| P07360 | 114 | LQABDABGAVHV | FALSE | TRUE | FALSE | 46.95 |
| P07360 | 115 | QABDABGAVHVV | FALSE | TRUE | FALSE | 33.85 |
| P07360 | 116 | ABDABGAVHVVV | FALSE | TRUE | FALSE | 17.88 |
| P07360 | 117 | BDABGAVHVVVA | FALSE | TRUE | FALSE | 10.06 |
| P07360 | 118 | DABGAVHVVVAE | FALSE | TRUE | FALSE | 14.35 |
| P07360 | 119 | ABGAVHVVVAET | FALSE | TRUE | FALSE | 14.65 |
| P07360 | 136 | AVLYLEBAGQLS | FALSE | TRUE | FALSE | 18.26 |
| P07360 | 137 | VLYLEBAGQLSV | FALSE | TRUE | FALSE | 18.54 |
| P07360 | 138 | LYLEBAGQLSVK | FALSE | TRUE | FALSE | 22.94 |
| P07360 | 139 | YLEBAGQLSVKL | FALSE | TRUE | FALSE | 12.69 |
| P07360 | 148 | VKLYABSLPVSD | FALSE | TRUE | FALSE | 23.76 |
| P07360 | 149 | KLYABSLPVSDS | FALSE | TRUE | FALSE | 37.49 |
| P07360 | 150 | LYABSLPVSDSV | FALSE | TRUE | FALSE | 24.75 |
| P07360 | 151 | YABSLPVSDSVL | FALSE | TRUE | FALSE | 10.09 |
| P07360 | 157 | VSDSVLSGFEQB | FALSE | TRUE | FALSE | 10.52 |
| P07360 | 158 | SDSVLSGFEQBV | FALSE | TRUE | FALSE | 10.01 |
| P07360 | 162 | LSGFEQBVQEAH | FALSE | TRUE | FALSE | 11.38 |
| P07360 | 163 | SGFEQBVQEAHL | FALSE | TRUE | FALSE | 16.24 |
| P07360 | 164 | GFEQBVQEAHLT | FALSE | TRUE | FALSE | 14.55 |
| P07360 | 165 | FEQBVQEAHLTE | FALSE | TRUE | FALSE | 16.06 |
| P02748 | 52  | SQCDPCLBQMFB | FALSE | TRUE | FALSE | 11.16 |
| P02748 | 53  | QCDPCLBQMFB  | FALSE | TRUE | FALSE | 18.18 |
| P02748 | 54  | CDPCLBQMFB   | FALSE | TRUE | FALSE | 37.34 |
| P02748 | 55  | DPCLBQMFB    | FALSE | TRUE | FALSE | 43.02 |
| P02748 | 56  | PCLBQMFB     | FALSE | TRUE | FALSE | 30.09 |
| P02748 | 57  | CLBQMFB      | FALSE | TRUE | FALSE | 52.59 |
| P02748 | 58  | LBQMFB       | FALSE | TRUE | FALSE | 55.89 |
| P02748 | 59  | BQMFB        | FALSE | TRUE | FALSE | 18.11 |
| P02748 | 60  | QMFB         | FALSE | TRUE | FALSE | 13.28 |
| P02748 | 61  | MFBS         | FALSE | TRUE | FALSE | 17.16 |
| P02748 | 75  | GKBCTDAVGDBB | FALSE | TRUE | FALSE | 10.31 |
| P02748 | 76  | KBCTDAVGDBBQ | FALSE | TRUE | FALSE | 22.14 |
| P02748 | 77  | BCTDAVGDBBQC | FALSE | TRUE | FALSE | 12.28 |
| P02748 | 81  | AVGDBBQCVPT  | FALSE | TRUE | FALSE | 11.32 |
| P02748 | 105 | FQCSTGBCIKMB | FALSE | TRUE | FALSE | 18.92 |
| P02748 | 106 | QCSTGBCIKMBL | FALSE | TRUE | FALSE | 16.54 |
| P02748 | 107 | CSTGBCIKMBLB | FALSE | TRUE | FALSE | 17.78 |
| P02748 | 108 | STGBCIKMBLBC | FALSE | TRUE | FALSE | 13.86 |
| P02748 | 109 | TGBCIKMBLBCN | FALSE | TRUE | FALSE | 16.78 |
| P02748 | 110 | GBCIKMBLBCNG | FALSE | TRUE | FALSE | 10.14 |

|        |     |               |       |      |       |       |
|--------|-----|---------------|-------|------|-------|-------|
| P02748 | 111 | BCIKMBLBCNGD  | FALSE | TRUE | FALSE | 17.63 |
| P02748 | 112 | CIKMBLBCNGDN  | FALSE | TRUE | FALSE | 16.04 |
| P02748 | 113 | IKMBLBCNGDND  | FALSE | TRUE | FALSE | 10.94 |
| P02748 | 150 | SELABTAGYGIN  | FALSE | TRUE | FALSE | 12.12 |
| P02748 | 151 | ELABTAGYGINI  | FALSE | TRUE | FALSE | 10.28 |
| P02748 | 183 | BDBDGNTLTYYB  | FALSE | TRUE | FALSE | 14.76 |
| P02748 | 184 | DBGNTLTYYBB   | FALSE | TRUE | FALSE | 20.99 |
| P02748 | 185 | BDGNTLTYYBBP  | FALSE | TRUE | FALSE | 17.86 |
| P02748 | 208 | GEKNFBTEHYEE  | FALSE | TRUE | FALSE | 12.68 |
| P02748 | 209 | EKNFBTEHYEEQ  | FALSE | TRUE | FALSE | 11.28 |
| P02748 | 299 | GEIHLGBFVMBN  | FALSE | TRUE | FALSE | 15.69 |
| P02748 | 300 | EIHLGBFVMBNB  | FALSE | TRUE | FALSE | 11.91 |
| P02748 | 301 | IHLGBFVMBNBD  | FALSE | TRUE | FALSE | 10.45 |
| P02748 | 302 | HLGBFVMBNBDV  | FALSE | TRUE | FALSE | 31.25 |
| P02748 | 303 | LGBFVMBNBDVV  | FALSE | TRUE | FALSE | 35.15 |
| P02748 | 304 | GBFVMBNBDVVL  | FALSE | TRUE | FALSE | 24    |
| P02748 | 305 | BFVMBNBDVVLT  | FALSE | TRUE | FALSE | 30.09 |
| P02748 | 306 | FVMBNBDVVLT   | FALSE | TRUE | FALSE | 21.02 |
| P02748 | 307 | VMBNBDVVLT    | FALSE | TRUE | FALSE | 10.16 |
| P02748 | 403 | DDCVKBGEGBAV  | FALSE | TRUE | FALSE | 13.09 |
| P02748 | 404 | DCVKBGEGBAVN  | FALSE | TRUE | FALSE | 16.55 |
| P02748 | 405 | CVKBGEGBAVNI  | FALSE | TRUE | FALSE | 22.14 |
| P02748 | 406 | VKBGEGBAVNIT  | FALSE | TRUE | FALSE | 30.85 |
| P02748 | 407 | KBGEGBAVNITS  | FALSE | TRUE | FALSE | 34.99 |
| P02748 | 408 | BGEGBAVNITSE  | FALSE | TRUE | FALSE | 30.97 |
| P02748 | 423 | DDVVSIBGGTB   | FALSE | TRUE | FALSE | 19.2  |
| P02748 | 424 | DVVSLIBGGTBK  | FALSE | TRUE | FALSE | 31.48 |
| P02748 | 425 | VVSLIBGGTBKY  | FALSE | TRUE | FALSE | 16.81 |
| P02748 | 426 | VSLIBGGTBKYA  | FALSE | TRUE | FALSE | 18.41 |
| P02748 | 427 | SLIBGGTBKYAF  | FALSE | TRUE | FALSE | 13.4  |
| P02748 | 428 | LIBGGTBKYAFE  | FALSE | TRUE | FALSE | 36.75 |
| P02748 | 429 | IBGGTBKYAFEL  | FALSE | TRUE | FALSE | 34.52 |
| P02748 | 438 | FELKEKLLBGTV  | FALSE | TRUE | FALSE | 12.35 |
| P02748 | 439 | ELKEKLLBGTVI  | FALSE | TRUE | FALSE | 13.01 |
| P02748 | 440 | LKEKLLBGTVID  | FALSE | TRUE | FALSE | 18.09 |
| P02748 | 441 | KEKLLBGTVIDV  | FALSE | TRUE | FALSE | 18.52 |
| P02748 | 442 | EKLLBGTVIDVT  | FALSE | TRUE | FALSE | 12.2  |
| P02748 | 443 | KLLBGTVIDVTD  | FALSE | TRUE | FALSE | 12.1  |
| P02748 | 498 | IEDYINEFSVBK  | FALSE | TRUE | FALSE | 14.2  |
| P00751 | 63  | PSGFYPYPVQTB  | FALSE | TRUE | FALSE | 16.62 |
| P00751 | 64  | SGFYPYPVQBTB  | FALSE | TRUE | FALSE | 24.38 |
| P00751 | 65  | GFYPYPVQBTBC  | FALSE | TRUE | FALSE | 10.82 |
| P00751 | 66  | FYPYPVQBTBCB  | FALSE | TRUE | FALSE | 14.82 |
| P00751 | 67  | YPYPVQBTBCBS  | FALSE | TRUE | FALSE | 18.41 |
| P00751 | 68  | PYPVQBTBCBST  | FALSE | TRUE | FALSE | 13.02 |
| P00751 | 69  | YPVQBTBCBSTG  | FALSE | TRUE | FALSE | 24.94 |
| P00751 | 70  | PVQBTBCBSTGS  | FALSE | TRUE | FALSE | 16.38 |
| P00751 | 71  | VQBTBCBSTGSW  | FALSE | TRUE | FALSE | 15.08 |
| P00751 | 72  | QBTBCBSTGSWS  | FALSE | TRUE | FALSE | 11.97 |
| P00751 | 73  | TBTBCBSTGSWST | FALSE | TRUE | FALSE | 13.22 |
| P00751 | 94  | BKAECBAIHCPB  | FALSE | TRUE | FALSE | 22.88 |
| P00751 | 107 | HDFENGEYWPBS  | FALSE | TRUE | FALSE | 13.62 |

|        |     |              |       |      |       |       |
|--------|-----|--------------|-------|------|-------|-------|
| P00751 | 128 | SFHCYDGYTLBG | FALSE | TRUE | FALSE | 13.47 |
| P00751 | 129 | FHCYDGYTLBGS | FALSE | TRUE | FALSE | 15.64 |
| P00751 | 131 | CYDGYTLBGSAN | FALSE | TRUE | FALSE | 19.55 |
| P00751 | 132 | YDGYTLBGSANB | FALSE | TRUE | FALSE | 29.31 |
| P00751 | 133 | DGYTLBGSANBT | FALSE | TRUE | FALSE | 31.5  |
| P00751 | 134 | GYTLBGSANBTC | FALSE | TRUE | FALSE | 23.24 |
| P00751 | 135 | YTLBGSANBTCQ | FALSE | TRUE | FALSE | 27.16 |
| P00751 | 136 | TLBGSANBTCQV | FALSE | TRUE | FALSE | 23.49 |
| P00751 | 137 | LBGSANBTCQVN | FALSE | TRUE | FALSE | 18.35 |
| P00751 | 138 | BGSANBTCQVNG | FALSE | TRUE | FALSE | 19.44 |
| P00751 | 139 | GSANBTCQVNGB | FALSE | TRUE | FALSE | 10.16 |
| P00751 | 141 | ANBTCQVNGBWS | FALSE | TRUE | FALSE | 11.94 |
| P00751 | 145 | CQVNGBWSGQTA | FALSE | TRUE | FALSE | 10.02 |
| P00751 | 146 | QVNGBWSGQTAI | FALSE | TRUE | FALSE | 14.87 |
| P00751 | 149 | GBWSGQTAICDN | FALSE | TRUE | FALSE | 10.69 |
| P00751 | 164 | YCSNPGIPIGTB | FALSE | TRUE | FALSE | 22.9  |
| P00751 | 171 | PIGTBKVGSQYB | FALSE | TRUE | FALSE | 13.72 |
| P00751 | 173 | GTBKVGSQYBLE | FALSE | TRUE | FALSE | 19.2  |
| P00751 | 174 | TBKVGSQYBLED | FALSE | TRUE | FALSE | 21.67 |
| P00751 | 175 | BKVGSQYBLEDS | FALSE | TRUE | FALSE | 15.14 |
| P00751 | 187 | VTYHCSBGLTLB | FALSE | TRUE | FALSE | 16.86 |
| P00751 | 188 | TYHCSBGLTLBG | FALSE | TRUE | FALSE | 24.89 |
| P00751 | 189 | YHCSBGLTLBGS | FALSE | TRUE | FALSE | 30.89 |
| P00751 | 190 | HCSBGLTLBGSQ | FALSE | TRUE | FALSE | 27.83 |
| P00751 | 191 | CSBGLTLBGSQB | FALSE | TRUE | FALSE | 37.49 |
| P00751 | 192 | SBGLTLBGSQBB | FALSE | TRUE | FALSE | 34.42 |
| P00751 | 193 | BGLTLBGSQBBT | FALSE | TRUE | FALSE | 50.72 |
| P00751 | 194 | GLTLBGSQBBTC | FALSE | TRUE | FALSE | 35.14 |
| P00751 | 195 | LTLBGSQBBTCQ | FALSE | TRUE | FALSE | 42.46 |
| P00751 | 196 | TLBGSQBBTCQE | FALSE | TRUE | FALSE | 31.22 |
| P00751 | 197 | LBGSQBBTCQEG | FALSE | TRUE | FALSE | 42.72 |
| P00751 | 198 | BGSQBBTCQEGG | FALSE | TRUE | FALSE | 23.06 |
| P00751 | 199 | GSQBBTCQEGGS | FALSE | TRUE | FALSE | 12.48 |
| P00751 | 200 | SQBBTCQEGGSW | FALSE | TRUE | FALSE | 11.26 |
| P00751 | 201 | QBBTCQEGGSWS | FALSE | TRUE | FALSE | 13.53 |
| P00751 | 371 | DVPPEGWNBTBH | FALSE | TRUE | FALSE | 17.63 |
| P00751 | 372 | VPPEGWNBTBHV | FALSE | TRUE | FALSE | 17.98 |
| P00751 | 373 | PPEGWNBTBHVI | FALSE | TRUE | FALSE | 11.23 |
| P00751 | 409 | LYIGKDBKNPBE | FALSE | TRUE | FALSE | 13.24 |
| P00751 | 410 | YIGKDBKNPBED | FALSE | TRUE | FALSE | 11.07 |
| P00751 | 411 | IGKDBKNPBEDY | FALSE | TRUE | FALSE | 18.86 |
| P00751 | 412 | GKDBKNPBEDYL | FALSE | TRUE | FALSE | 16.79 |
| P00751 | 413 | KDBKNPBEDYLD | FALSE | TRUE | FALSE | 10.8  |
| P00751 | 414 | DBKNPBEDYLDV | FALSE | TRUE | FALSE | 17.55 |
| P00751 | 415 | BKNPBEDYLDVY | FALSE | TRUE | FALSE | 18.55 |
| P00751 | 476 | SLCGMVWEHBKG | FALSE | TRUE | FALSE | 15.07 |
| P00751 | 477 | LCGMVWEHBKGT | FALSE | TRUE | FALSE | 19.88 |
| P00751 | 478 | CGMVWEHBKGTD | FALSE | TRUE | FALSE | 13.93 |
| P00751 | 479 | GMVWEHBKGTDY | FALSE | TRUE | FALSE | 16.4  |
| P00751 | 480 | MVWEHBKGTDYH | FALSE | TRUE | FALSE | 22.81 |
| P00751 | 481 | VWEHBKGTDYHK | FALSE | TRUE | FALSE | 24.46 |
| P00751 | 482 | WEHBKGTDYHKQ | FALSE | TRUE | FALSE | 23.83 |

|        |     |              |       |      |       |       |
|--------|-----|--------------|-------|------|-------|-------|
| P00751 | 483 | EHBKGTDYHKQP | FALSE | TRUE | FALSE | 14    |
| P00751 | 597 | LPCTEGTTBALB | FALSE | TRUE | FALSE | 16.45 |
| P00751 | 598 | PCTEGTTBALBL | FALSE | TRUE | FALSE | 16.63 |
| P00751 | 599 | CTEGTTBALBLP | FALSE | TRUE | FALSE | 13.19 |
| P00751 | 600 | TEGTTBALBLPP | FALSE | TRUE | FALSE | 15.49 |
| P00751 | 601 | EGTTBALBLPPT | FALSE | TRUE | FALSE | 19.25 |
| P00751 | 602 | GTTBALBLPPTT | FALSE | TRUE | FALSE | 19.13 |
| P00751 | 603 | TTBALBLPPTTT | FALSE | TRUE | FALSE | 24.83 |
| P00751 | 640 | LTBKEVYIKNGD | FALSE | TRUE | FALSE | 19.39 |
| P00751 | 695 | CBGDSGGPLIVH | FALSE | TRUE | FALSE | 11.77 |
| P08603 | 21  | CNELPPBBNTEI | FALSE | TRUE | FALSE | 11.52 |
| P08603 | 22  | NELPPBBNTEIL | FALSE | TRUE | FALSE | 10.7  |
| P08603 | 24  | LPPBBNTEILTG | FALSE | TRUE | FALSE | 14.16 |
| P08603 | 25  | PPBBNTEILTGS | FALSE | TRUE | FALSE | 11.6  |
| P08603 | 27  | BBNTEILTGSWS | FALSE | TRUE | FALSE | 13.26 |
| P08603 | 46  | TQAIYKCBPGYB | FALSE | TRUE | FALSE | 12.56 |
| P08603 | 47  | QAIYKCBPGYBS | FALSE | TRUE | FALSE | 11.52 |
| P08603 | 64  | MVCBKGEWVALN | FALSE | TRUE | FALSE | 10.41 |
| P08603 | 65  | VCBKGEWVALNP | FALSE | TRUE | FALSE | 11.39 |
| P08603 | 66  | CBKGEWVALNPL | FALSE | TRUE | FALSE | 10.96 |
| P08603 | 67  | BKGEWVALNPLB | FALSE | TRUE | FALSE | 14.45 |
| P08603 | 117 | GYQLLGEINYBE | FALSE | TRUE | FALSE | 12.54 |
| P08603 | 235 | YKCNMGYEYSEB | FALSE | TRUE | FALSE | 12.68 |
| P08603 | 236 | KCNMGYEYSEBG | FALSE | TRUE | FALSE | 25.04 |
| P08603 | 237 | CNMGYEYSEBGD | FALSE | TRUE | FALSE | 11.62 |
| P08603 | 238 | NMGYEYSEBGDA | FALSE | TRUE | FALSE | 18.85 |
| P08603 | 239 | MGYEYSEBGDAV | FALSE | TRUE | FALSE | 29.26 |
| P08603 | 240 | GYEYSEBGDAVC | FALSE | TRUE | FALSE | 19.14 |
| P08603 | 241 | YEYSEBGDAVCT | FALSE | TRUE | FALSE | 18.39 |
| P08603 | 242 | EYSEBGDAVCTE | FALSE | TRUE | FALSE | 19.67 |
| P08603 | 243 | YSEBGDAVCTES | FALSE | TRUE | FALSE | 17.4  |
| P08603 | 244 | SEBGDAVCTESG | FALSE | TRUE | FALSE | 10.34 |
| P08603 | 246 | BGDAVCTESGWB | FALSE | TRUE | FALSE | 10.06 |
| P08603 | 274 | NGDYSPLBIKHB | FALSE | TRUE | FALSE | 11.83 |
| P08603 | 275 | GDYSPLBIKHBT | FALSE | TRUE | FALSE | 10.95 |
| P08603 | 276 | DYSPLBIKHBTG | FALSE | TRUE | FALSE | 10.87 |
| P08603 | 277 | YSPLBIKHBTGD | FALSE | TRUE | FALSE | 23    |
| P08603 | 278 | SPLBIKHBTGDE | FALSE | TRUE | FALSE | 26.56 |
| P08603 | 279 | PLBIKHBTGDEI | FALSE | TRUE | FALSE | 23.73 |
| P08603 | 280 | LBIKHBTGDEIT | FALSE | TRUE | FALSE | 32.84 |
| P08603 | 281 | BIKHBTGDEITY | FALSE | TRUE | FALSE | 29.75 |
| P08603 | 282 | IKHBTGDEITYQ | FALSE | TRUE | FALSE | 16.77 |
| P08603 | 284 | HBTGDEITYQCB | FALSE | TRUE | FALSE | 12.39 |
| P08603 | 285 | BTGDEITYQCBN | FALSE | TRUE | FALSE | 14.58 |
| P08603 | 291 | TYQCBNGFYPAT | FALSE | TRUE | FALSE | 14.24 |
| P08603 | 292 | YQCBNGFYPATB | FALSE | TRUE | FALSE | 45.28 |
| P08603 | 293 | QCBNGFYPATBG | FALSE | TRUE | FALSE | 45.77 |
| P08603 | 294 | CBNGFYPATBGN | FALSE | TRUE | FALSE | 57.94 |
| P08603 | 295 | BNGFYPATBGNT | FALSE | TRUE | FALSE | 51.66 |
| P08603 | 296 | NGFYPATBGNTA | FALSE | TRUE | FALSE | 41.35 |
| P08603 | 297 | GFYPATBGNTAK | FALSE | TRUE | FALSE | 17.77 |
| P08603 | 298 | FYPATBGNTAKC | FALSE | TRUE | FALSE | 23.35 |

|        |      |              |       |      |       |       |
|--------|------|--------------|-------|------|-------|-------|
| P08603 | 299  | YPATBGNTAKCT | FALSE | TRUE | FALSE | 30.3  |
| P08603 | 300  | PATBGNTAKCTS | FALSE | TRUE | FALSE | 10.04 |
| P08603 | 302  | TBGNTAKCTSTG | FALSE | TRUE | FALSE | 11.96 |
| P08603 | 393  | YLENGYNQNYGB | FALSE | TRUE | FALSE | 12.01 |
| P08603 | 563  | ICYEBECELPKI | FALSE | TRUE | FALSE | 12.65 |
| P08603 | 769  | KEFDHNSNIBYB | FALSE | TRUE | FALSE | 13.02 |
| P08603 | 772  | DHNSNIBYBCBG | FALSE | TRUE | FALSE | 14.58 |
| P08603 | 774  | NSNIBYBCBGKE | FALSE | TRUE | FALSE | 28.1  |
| P08603 | 775  | SNIBYBCBGKEG | FALSE | TRUE | FALSE | 40.31 |
| P08603 | 776  | NIBYBCBGKEGW | FALSE | TRUE | FALSE | 17.52 |
| P08603 | 777  | IBYBCBGKEGWI | FALSE | TRUE | FALSE | 18.89 |
| P08603 | 778  | BYBCBGKEGWIH | FALSE | TRUE | FALSE | 18.99 |
| P08603 | 779  | YBCBGKEGWIHT | FALSE | TRUE | FALSE | 14.18 |
| P08603 | 780  | BCBGKEGWIHTV | FALSE | TRUE | FALSE | 11.85 |
| P08603 | 821  | HNMTTTLNYBDG | FALSE | TRUE | FALSE | 13.47 |
| P08603 | 822  | NMTTTLNYBDGE | FALSE | TRUE | FALSE | 12.83 |
| P08603 | 823  | MTTTLNYBDGEK | FALSE | TRUE | FALSE | 14.29 |
| P08603 | 824  | TTTLNYBDGEKV | FALSE | TRUE | FALSE | 21.28 |
| P08603 | 825  | TTLNYBDGEKVS | FALSE | TRUE | FALSE | 25.06 |
| P08603 | 826  | TLNYBDGEKVSV | FALSE | TRUE | FALSE | 20.31 |
| P08603 | 827  | LNYBDGEKVSVL | FALSE | TRUE | FALSE | 17.43 |
| P08603 | 856  | GBWQSIPLCVEK | FALSE | TRUE | FALSE | 15.15 |
| P08603 | 880  | TINSSBSSQESY | FALSE | TRUE | FALSE | 13.54 |
| P08603 | 884  | SBSSQESYAHGT | FALSE | TRUE | FALSE | 11.68 |
| P08603 | 903  | GGFBISEENETT | FALSE | TRUE | FALSE | 14.05 |
| P08603 | 1029 | NVTCINSBWTGB | FALSE | TRUE | FALSE | 16.95 |
| P08603 | 1030 | VTCINSBWTGBP | FALSE | TRUE | FALSE | 10.27 |
| P08603 | 1031 | TCINSBWTGBPT | FALSE | TRUE | FALSE | 10.65 |
| P08603 | 1033 | INSBWTGBPTCB | FALSE | TRUE | FALSE | 13.06 |
| P08603 | 1035 | SBWTGBPTCBDT | FALSE | TRUE | FALSE | 10.25 |
| P08603 | 1052 | PTVQNAYIVSBQ | FALSE | TRUE | FALSE | 16.73 |
| P08603 | 1053 | TVQNAYIVSBQM | FALSE | TRUE | FALSE | 21.71 |
| P08603 | 1054 | VQNAYIVSBQMS | FALSE | TRUE | FALSE | 29.31 |
| P08603 | 1055 | QNAYIVSBQMSK | FALSE | TRUE | FALSE | 19.79 |
| P08603 | 1057 | AYIVSBQMSKYP | FALSE | TRUE | FALSE | 13.07 |
| P08603 | 1058 | YIVSBQMSKYPS | FALSE | TRUE | FALSE | 22.88 |
| P08603 | 1059 | IVSBQMSKYPSG | FALSE | TRUE | FALSE | 26.26 |
| P08603 | 1060 | VSBQMSKYPSGE | FALSE | TRUE | FALSE | 27.34 |
| P08603 | 1061 | SBQMSKYPSGEB | FALSE | TRUE | FALSE | 29.72 |
| P08603 | 1062 | BQMSKYPSGEBV | FALSE | TRUE | FALSE | 13.18 |
| P08603 | 1064 | MSKYPSGEBVBY | FALSE | TRUE | FALSE | 12.18 |
| P08603 | 1069 | SGEBVBYQCBSP | FALSE | TRUE | FALSE | 10.16 |
| P08603 | 1138 | CQNLYQLEGNKB | FALSE | TRUE | FALSE | 12.49 |
| P08603 | 1143 | QLEGNKBITCBN | FALSE | TRUE | FALSE | 11.54 |
| P08603 | 1144 | LEGNKBITCBNG | FALSE | TRUE | FALSE | 15.2  |
| P08603 | 1145 | EGNKBITCBNGQ | FALSE | TRUE | FALSE | 11.92 |
| P08603 | 1148 | KBITCBNGQWSE | FALSE | TRUE | FALSE | 15.44 |
| P08603 | 1151 | TCBNGQWSEPPK | FALSE | TRUE | FALSE | 14.64 |
| P08603 | 1161 | PKCLHPCVISBE | FALSE | TRUE | FALSE | 19.12 |
| P08603 | 1162 | KCLHPCVISBEI | FALSE | TRUE | FALSE | 19.07 |
| P08603 | 1163 | CLHPCVISBEIM | FALSE | TRUE | FALSE | 19.11 |
| P08603 | 1164 | LHPCVISBEIME | FALSE | TRUE | FALSE | 17.17 |

|        |      |              |       |      |       |       |
|--------|------|--------------|-------|------|-------|-------|
| P08603 | 1165 | HPCVISBEIMEN | FALSE | TRUE | FALSE | 19.57 |
| P08603 | 1166 | PCVISBEIMENY | FALSE | TRUE | FALSE | 21.85 |
| P08603 | 1167 | CVISBEIMENYN | FALSE | TRUE | FALSE | 20.1  |
| P08603 | 1168 | VISBEIMENYNI | FALSE | TRUE | FALSE | 15.95 |
| P08603 | 1169 | ISBEIMENYNIA | FALSE | TRUE | FALSE | 18.01 |
| P08603 | 1170 | SBEIMENYNIAL | FALSE | TRUE | FALSE | 11.37 |
| P08603 | 1171 | BEIMENYNIALB | FALSE | TRUE | FALSE | 10.06 |
| P08603 | 1175 | ENYNIALBWTAK | FALSE | TRUE | FALSE | 19.76 |
| P08603 | 1184 | TAKQKLYSBTGE | FALSE | TRUE | FALSE | 13.76 |
| P08603 | 1185 | AKQKLYSBTGES | FALSE | TRUE | FALSE | 14.97 |
| P08603 | 1186 | KQKLYSBTGESV | FALSE | TRUE | FALSE | 37.43 |
| P08603 | 1187 | QKLYSBTGESVE | FALSE | TRUE | FALSE | 53.42 |
| P08603 | 1188 | KLYSBTGESVEF | FALSE | TRUE | FALSE | 35.28 |
| P08603 | 1189 | LYSBTGESVEFV | FALSE | TRUE | FALSE | 27.49 |
| P08603 | 1192 | BTGESVEFVCKB | FALSE | TRUE | FALSE | 13.74 |
| P08603 | 1195 | ESVEFVCKBGYB | FALSE | TRUE | FALSE | 12.86 |
| P08603 | 1196 | SVEFVCKBGYBL | FALSE | TRUE | FALSE | 14.99 |
| P08603 | 1197 | VEFVCKBGYBLS | FALSE | TRUE | FALSE | 18.4  |
| P08603 | 1198 | EFVCKBGYBLSS | FALSE | TRUE | FALSE | 16.34 |
| P08603 | 1199 | FVCKBGYBLSSB | FALSE | TRUE | FALSE | 20.53 |
| P08603 | 1200 | VCKBGYBLSSBS | FALSE | TRUE | FALSE | 43.18 |
| P08603 | 1201 | CKBGYBLSSBSH | FALSE | TRUE | FALSE | 21.87 |
| P08603 | 1202 | KBGYBLSSBSHT | FALSE | TRUE | FALSE | 19.6  |
| P08603 | 1203 | BGYBLSSBSHTL | FALSE | TRUE | FALSE | 13.68 |
| P08603 | 1206 | BLSSBSHTLBTT | FALSE | TRUE | FALSE | 14.24 |
| P08603 | 1207 | LSSBSHTLBTT  | FALSE | TRUE | FALSE | 11.28 |
| P08603 | 1220 | DGKLEYPTCAKB | FALSE | TRUE | FALSE | 10.68 |
| Q03591 | 8    | ILISSVGGGE   | FALSE | TRUE | FALSE | 10.29 |
| Q03591 | 128  | SCVEBGWSTPPK | FALSE | TRUE | FALSE | 11.38 |
| Q03591 | 130  | VEBGWSTPPKCB | FALSE | TRUE | FALSE | 15.5  |
| Q03591 | 131  | EBGWSTPPKCBS | FALSE | TRUE | FALSE | 13.59 |
| Q03591 | 132  | BGWSTPPKCBST | FALSE | TRUE | FALSE | 13.97 |
| Q03591 | 152  | TVQNAHILSBQM | FALSE | TRUE | FALSE | 13.14 |
| Q03591 | 153  | VQNAHILSBQMS | FALSE | TRUE | FALSE | 12.53 |
| Q03591 | 154  | QNAHILSBQMSK | FALSE | TRUE | FALSE | 13.76 |
| Q03591 | 157  | HILSBQMSKYPS | FALSE | TRUE | FALSE | 12.47 |
| Q03591 | 158  | ILSBQMSKYPSG | FALSE | TRUE | FALSE | 21.22 |
| Q03591 | 159  | LSBQMSKYPSGE | FALSE | TRUE | FALSE | 29.15 |
| Q03591 | 160  | SBQMSKYPSGEB | FALSE | TRUE | FALSE | 29.72 |
| Q03591 | 161  | BQMSKYPSGEBV | FALSE | TRUE | FALSE | 13.18 |
| Q03591 | 163  | MSKYPSGEBVBY | FALSE | TRUE | FALSE | 12.18 |
| Q03591 | 168  | SGEBVBYECBSP | FALSE | TRUE | FALSE | 10.92 |
| Q03591 | 171  | BVBYECBSPYEM | FALSE | TRUE | FALSE | 10.08 |
| Q03591 | 237  | CQNLYQLEGNKB | FALSE | TRUE | FALSE | 12.49 |
| Q03591 | 242  | QLEGNKBITCBN | FALSE | TRUE | FALSE | 11.54 |
| Q03591 | 243  | LEGNKBITCBNG | FALSE | TRUE | FALSE | 15.2  |
| Q03591 | 244  | EGNKBITCBNGQ | FALSE | TRUE | FALSE | 11.92 |
| Q03591 | 247  | KBITCBNGQWSE | FALSE | TRUE | FALSE | 15.44 |
| Q03591 | 250  | TCBNGQWSEPPK | FALSE | TRUE | FALSE | 14.64 |
| Q03591 | 260  | PKCLHPCVISBE | FALSE | TRUE | FALSE | 19.12 |
| Q03591 | 261  | KCLHPCVISBEI | FALSE | TRUE | FALSE | 19.07 |
| Q03591 | 262  | CLHPCVISBEIM | FALSE | TRUE | FALSE | 19.11 |

|        |     |               |       |      |       |       |
|--------|-----|---------------|-------|------|-------|-------|
| Q03591 | 263 | LHPCVISBEIME  | FALSE | TRUE | FALSE | 17.17 |
| Q03591 | 264 | HPCVISBEIMEN  | FALSE | TRUE | FALSE | 19.57 |
| Q03591 | 265 | PCVISBEIMENY  | FALSE | TRUE | FALSE | 21.85 |
| Q03591 | 266 | CVISBEIMENYN  | FALSE | TRUE | FALSE | 20.1  |
| Q03591 | 267 | VISBEIMENYNI  | FALSE | TRUE | FALSE | 15.95 |
| Q03591 | 268 | ISBEIMENYNIA  | FALSE | TRUE | FALSE | 18.01 |
| Q03591 | 269 | SBEIMENYNIAL  | FALSE | TRUE | FALSE | 11.37 |
| Q03591 | 270 | BEIMENYNIALB  | FALSE | TRUE | FALSE | 10.06 |
| Q03591 | 274 | ENYNIALBWTAK  | FALSE | TRUE | FALSE | 19.76 |
| Q03591 | 284 | AKQKLYLBTGES  | FALSE | TRUE | FALSE | 10.12 |
| Q03591 | 285 | KQKLYLBTGESA  | FALSE | TRUE | FALSE | 12.97 |
| Q03591 | 286 | QKLYLBTGESAE  | FALSE | TRUE | FALSE | 28.08 |
| Q03591 | 287 | KLYLBTGESAEF  | FALSE | TRUE | FALSE | 26.56 |
| Q03591 | 288 | LYLBTGESAEFV  | FALSE | TRUE | FALSE | 16.59 |
| Q03591 | 291 | BTGESAEFVCKB  | FALSE | TRUE | FALSE | 15.97 |
| Q03591 | 292 | TGESAEFVCKBG  | FALSE | TRUE | FALSE | 11.55 |
| Q03591 | 293 | GESAEFVCKBGY  | FALSE | TRUE | FALSE | 13.45 |
| Q03591 | 294 | ESAEFVCKBGYB  | FALSE | TRUE | FALSE | 18.22 |
| Q03591 | 295 | SAEFVCKBGYBL  | FALSE | TRUE | FALSE | 20.43 |
| Q03591 | 296 | AEFVCKBGYBLS  | FALSE | TRUE | FALSE | 10.6  |
| Q03591 | 297 | EFVCKBGYBLSS  | FALSE | TRUE | FALSE | 16.34 |
| Q03591 | 298 | FVCKBGYBLSSB  | FALSE | TRUE | FALSE | 20.53 |
| Q03591 | 299 | VCKBGYBLSSBS  | FALSE | TRUE | FALSE | 43.18 |
| Q03591 | 300 | CKBGYBLSSBSH  | FALSE | TRUE | FALSE | 21.87 |
| Q03591 | 301 | KBGYBLSSBSHT  | FALSE | TRUE | FALSE | 19.6  |
| Q03591 | 302 | BGYBLSSBSHTL  | FALSE | TRUE | FALSE | 13.68 |
| Q03591 | 305 | BLSSBSHTLBTT  | FALSE | TRUE | FALSE | 14.24 |
| Q03591 | 306 | LSSBSHTLBTTT  | FALSE | TRUE | FALSE | 11.28 |
| Q03591 | 319 | DGKLEYPTCAKB  | FALSE | TRUE | FALSE | 10.68 |
| P36980 | 8   | ILISBISSVGGE  | FALSE | TRUE | FALSE | 10.29 |
| P36980 | 128 | SCVEBGWSTPPK  | FALSE | TRUE | FALSE | 11.38 |
| P36980 | 130 | VEBGWSTPPKCB  | FALSE | TRUE | FALSE | 15.5  |
| P36980 | 131 | EBGWSTPPKCBS  | FALSE | TRUE | FALSE | 13.59 |
| P36980 | 132 | BGWSTPPKCBST  | FALSE | TRUE | FALSE | 13.97 |
| P36980 | 191 | TCBNGQWSEPPK  | FALSE | TRUE | FALSE | 14.64 |
| P36980 | 224 | TNQQKLYSBTGD  | FALSE | TRUE | FALSE | 35.36 |
| P36980 | 225 | NQQKLYSBTGDI  | FALSE | TRUE | FALSE | 47.51 |
| P36980 | 226 | QQKLYSBTGDIV  | FALSE | TRUE | FALSE | 57.94 |
| P36980 | 227 | QKLYSBTGDIVE  | FALSE | TRUE | FALSE | 44.16 |
| P36980 | 228 | KLYSBTGDIVEF  | FALSE | TRUE | FALSE | 34.62 |
| P36980 | 229 | LYSBTGDIVEFV  | FALSE | TRUE | FALSE | 16.24 |
| Q02985 | 91  | YLENGYNQNYGB  | FALSE | TRUE | FALSE | 12.01 |
| Q02985 | 100 | YGBKFVQGNSTE  | FALSE | TRUE | FALSE | 18.37 |
| Q02985 | 134 | WSPTPBCIBVBT  | FALSE | TRUE | FALSE | 11.67 |
| Q02985 | 139 | BCIBVBTCSDKSD | FALSE | TRUE | FALSE | 13    |
| Q02985 | 285 | BSDBKYYAKTGD  | FALSE | TRUE | FALSE | 12.35 |
| Q02985 | 314 | SFQAVCBEGIVE  | FALSE | TRUE | FALSE | 10.09 |
| Q02985 | 315 | FQAVCBEGIVEY  | FALSE | TRUE | FALSE | 10.8  |
| Q02985 | 316 | QAVCBEGIVEYP  | FALSE | TRUE | FALSE | 11.43 |
| Q02985 | 317 | AVCBEGIVEYPB  | FALSE | TRUE | FALSE | 11.8  |
| Q02985 | 319 | CBEGIVEYPBCE  | FALSE | TRUE | FALSE | 10.11 |
| Q92496 | 152 | PVFENSBKSNNG  | FALSE | TRUE | FALSE | 11.78 |



|        |     |              |       |      |       |       |
|--------|-----|--------------|-------|------|-------|-------|
| Q92496 | 153 | VFENSBKSNM   | FALSE | TRUE | FALSE | 21.45 |
| Q92496 | 154 | FENSBKSNMW   | FALSE | TRUE | FALSE | 17.61 |
| Q92496 | 276 | IQHGHLYYENTB | FALSE | TRUE | FALSE | 15.63 |
| Q92496 | 277 | QHGHLYYENTBB | FALSE | TRUE | FALSE | 18.48 |
| Q92496 | 399 | PVFENSBKSNM  | FALSE | TRUE | FALSE | 11.78 |
| Q92496 | 400 | VFENSBKSNM   | FALSE | TRUE | FALSE | 21.45 |
| Q92496 | 401 | FENSBKSNM    | FALSE | TRUE | FALSE | 29.77 |
| Q92496 | 402 | ENSBKSNM     | FALSE | TRUE | FALSE | 22.53 |
| Q92496 | 562 | SFQAVCBEGIVE | FALSE | TRUE | FALSE | 10.09 |
| Q92496 | 563 | FQAVCBEGIVEY | FALSE | TRUE | FALSE | 10.8  |
| Q92496 | 564 | QAVCBEGIVEYP | FALSE | TRUE | FALSE | 11.43 |
| Q92496 | 565 | AVCBEGIVEYPB | FALSE | TRUE | FALSE | 11.8  |
| Q92496 | 567 | CBEGIVEYPBCE | FALSE | TRUE | FALSE | 10.11 |
| Q9BXR6 | 174 | SCBKLIBVGS   | FALSE | TRUE | FALSE | 17.26 |
| Q9BXR6 | 175 | CBKLIBVGS    | FALSE | TRUE | FALSE | 16.43 |
| Q9BXR6 | 176 | BKLIBVGS     | FALSE | TRUE | FALSE | 15.89 |
| Q9BXR6 | 345 | SGKEFNHNSBIB | FALSE | TRUE | FALSE | 14    |
| Q9BXR6 | 347 | KEFNHNSBIBYB | FALSE | TRUE | FALSE | 12.22 |
| Q9BXR6 | 351 | HNSBIBYBCSDI | FALSE | TRUE | FALSE | 13.64 |
| Q9BXR6 | 353 | SBIBYBCSDIFB | FALSE | TRUE | FALSE | 10.39 |
| Q9BXR6 | 355 | IBYBCSDIFBYB | FALSE | TRUE | FALSE | 10.14 |
| Q9BXR6 | 357 | YBCSDIFBYBHS | FALSE | TRUE | FALSE | 12.99 |
| Q9BXR6 | 358 | BCSDIFBYBHSV | FALSE | TRUE | FALSE | 18.08 |
| Q9BXR6 | 381 | CTEKBEQFCPPP | FALSE | TRUE | FALSE | 10.49 |
| Q9BXR6 | 382 | TEKBEQFCPPP  | FALSE | TRUE | FALSE | 10.27 |
| Q9BXR6 | 383 | EKBEQFCPPPQ  | FALSE | TRUE | FALSE | 10.21 |
| Q9BXR6 | 429 | IVCKDGBWQSLP | FALSE | TRUE | FALSE | 10.81 |
| Q9BXR6 | 430 | VCKDGBWQSLPB | FALSE | TRUE | FALSE | 17.31 |
| Q9BXR6 | 431 | CKDGBWQSLPBC | FALSE | TRUE | FALSE | 10.75 |
| Q9BXR6 | 432 | KDGBWQSLPBCV | FALSE | TRUE | FALSE | 10.39 |
| Q9BXR6 | 433 | DGBWQSLPBCVE | FALSE | TRUE | FALSE | 13.75 |
| Q9BXR6 | 434 | GBWQSLPBCVES | FALSE | TRUE | FALSE | 15.33 |
| Q9BXR6 | 466 | SVYPPGSTVTYB | FALSE | TRUE | FALSE | 19.02 |
| Q9BXR6 | 491 | TCBNKQWSEPPB | FALSE | TRUE | FALSE | 12.76 |
| P05156 | 69  | KNGTAVCATNB  | FALSE | TRUE | FALSE | 12.1  |
| P05156 | 70  | NGTAVCATNB   | FALSE | TRUE | FALSE | 15.56 |
| P05156 | 71  | GTAVCATNB    | FALSE | TRUE | FALSE | 16.41 |
| P05156 | 72  | TAVCATNB     | FALSE | TRUE | FALSE | 22.67 |
| P05156 | 73  | AVCATNB      | FALSE | TRUE | FALSE | 24.03 |
| P05156 | 74  | VCATNB       | FALSE | TRUE | FALSE | 20.6  |
| P05156 | 76  | ATNB         | FALSE | TRUE | FALSE | 18.14 |
| P05156 | 77  | TNB          | FALSE | TRUE | FALSE | 17.51 |
| P05156 | 138 | MFICKSSW     | FALSE | TRUE | FALSE | 14.33 |
| P05156 | 139 | FICKSSW      | FALSE | TRUE | FALSE | 10.9  |
| P05156 | 140 | ICKSSW       | FALSE | TRUE | FALSE | 11.97 |
| P05156 | 141 | CKSSW        | FALSE | TRUE | FALSE | 18.95 |
| P05156 | 142 | KSSW         | FALSE | TRUE | FALSE | 12.46 |
| P05156 | 143 | SSW          | FALSE | TRUE | FALSE | 14.63 |
| P05156 | 144 | SW           | FALSE | TRUE | FALSE | 17.32 |
| P05156 | 145 | WS           | FALSE | TRUE | FALSE | 16.77 |
| P05156 | 146 | SM           | FALSE | TRUE | FALSE | 12.75 |
| P05156 | 157 | LGFQQGADTQBB | FALSE | TRUE | FALSE | 11.24 |

|        |     |              |       |      |       |       |
|--------|-----|--------------|-------|------|-------|-------|
| P05156 | 158 | GFQQGADTQBBF | FALSE | TRUE | FALSE | 13.81 |
| P05156 | 159 | FQQGADTQBBFK | FALSE | TRUE | FALSE | 17.47 |
| P05156 | 160 | QQGADTQBBFKL | FALSE | TRUE | FALSE | 14.61 |
| P05156 | 161 | QGADTQBBFKLS | FALSE | TRUE | FALSE | 17.92 |
| P05156 | 162 | GADTQBBFKLSD | FALSE | TRUE | FALSE | 21.23 |
| P05156 | 163 | ADTQBBFKLSDL | FALSE | TRUE | FALSE | 24.96 |
| P05156 | 164 | DTQBBFKLSDLS | FALSE | TRUE | FALSE | 18.95 |
| P05156 | 165 | TQBBFKLSDLSI | FALSE | TRUE | FALSE | 10.45 |
| P05156 | 190 | ETSLAECTFTKB | FALSE | TRUE | FALSE | 21.44 |
| P05156 | 191 | TSLAECTFTKBB | FALSE | TRUE | FALSE | 32.65 |
| P05156 | 192 | SLAECTFTKBBT | FALSE | TRUE | FALSE | 28.78 |
| P05156 | 193 | LAECTFTKBBTM | FALSE | TRUE | FALSE | 23.83 |
| P05156 | 194 | AECTFTKBBTMG | FALSE | TRUE | FALSE | 23.75 |
| P05156 | 195 | ECTFTKBBTMGY | FALSE | TRUE | FALSE | 23.19 |
| P05156 | 196 | CTFTKBBTMGYQ | FALSE | TRUE | FALSE | 19.58 |
| P05156 | 197 | TFTKBBTMGYQD | FALSE | TRUE | FALSE | 30.82 |
| P05156 | 198 | FTKBBTMGYQDF | FALSE | TRUE | FALSE | 30.55 |
| P05156 | 200 | KBBTMGYQDFAD | FALSE | TRUE | FALSE | 18.94 |
| P05156 | 201 | BBTMGYQDFADV | FALSE | TRUE | FALSE | 14.15 |
| P05156 | 309 | ADMDAEBBBIKS | FALSE | TRUE | FALSE | 13.08 |
| P05156 | 310 | DMDAEBBBIKSL | FALSE | TRUE | FALSE | 13.72 |
| P05156 | 312 | DAEBBBIKSLLP | FALSE | TRUE | FALSE | 16.18 |
| P05156 | 325 | LSCGVKNBMHIB | FALSE | TRUE | FALSE | 11.3  |
| P05156 | 326 | SCGVKNBMHIBB | FALSE | TRUE | FALSE | 16.62 |
| P05156 | 331 | NBMHIBBKBIVG | FALSE | TRUE | FALSE | 10.2  |
| P05156 | 332 | BMHIBBKBIVGG | FALSE | TRUE | FALSE | 11.6  |
| P05156 | 339 | BIVGGKBAQLGD | FALSE | TRUE | FALSE | 21.46 |
| P05156 | 340 | IVGGKBAQLGDL | FALSE | TRUE | FALSE | 10.44 |
| P05156 | 342 | GGKBAQLGDLPW | FALSE | TRUE | FALSE | 12.85 |
| P05156 | 464 | NDTCIVSGWGBE | FALSE | TRUE | FALSE | 11.04 |
| P05156 | 465 | DTCIVSGWGBEK | FALSE | TRUE | FALSE | 13.33 |
| P05156 | 467 | CIVSGWGBEKDN | FALSE | TRUE | FALSE | 11.49 |
| P05156 | 468 | IVSGWGBEKDNE | FALSE | TRUE | FALSE | 11.51 |
| P05156 | 469 | VSGWGBEKDNEB | FALSE | TRUE | FALSE | 18.1  |
| P05156 | 470 | SGWGBEKDNEBV | FALSE | TRUE | FALSE | 17.41 |
| P05156 | 471 | GWGBEKDNEBVF | FALSE | TRUE | FALSE | 17.58 |
| P05156 | 472 | WGBEKDNEBVFS | FALSE | TRUE | FALSE | 26.8  |
| P05156 | 473 | GBEKDNEBVFSL | FALSE | TRUE | FALSE | 12.62 |
| P31146 | 1   | MSBQVVBSKFB  | FALSE | TRUE | FALSE | 41.28 |
| P31146 | 2   | SBQVVBSKFBH  | FALSE | TRUE | FALSE | 31.24 |
| P31146 | 3   | BQVVBSKFBHV  | FALSE | TRUE | FALSE | 19.59 |
| P31146 | 180 | YSVDWSBDGGLI | FALSE | TRUE | FALSE | 15.07 |
| P31146 | 181 | SVDWSBDGGLIC | FALSE | TRUE | FALSE | 11.1  |
| P31146 | 182 | VDWSBDGGLICT | FALSE | TRUE | FALSE | 10.8  |
| P31146 | 183 | DWSBDGGLICTS | FALSE | TRUE | FALSE | 12.47 |
| P31146 | 188 | GGLICTSCBDKB | FALSE | TRUE | FALSE | 18.04 |
| P31146 | 189 | GLICTSCBDKBV | FALSE | TRUE | FALSE | 13.5  |
| P31146 | 190 | LICTSCBDKBVB | FALSE | TRUE | FALSE | 13.54 |
| P31146 | 191 | ICTSCBDKBVBI | FALSE | TRUE | FALSE | 15.94 |
| P31146 | 194 | SCBDKBVBIIEP | FALSE | TRUE | FALSE | 10.88 |
| P31146 | 195 | CBDKBVBIIEPB | FALSE | TRUE | FALSE | 21.43 |
| P31146 | 196 | BDKBVBIIEPBK | FALSE | TRUE | FALSE | 15.66 |

|        |     |               |       |      |       |       |
|--------|-----|---------------|-------|------|-------|-------|
| P31146 | 197 | DKBVIIIEPBKG  | FALSE | TRUE | FALSE | 10.96 |
| P31146 | 199 | BVBIIEPBKGTV  | FALSE | TRUE | FALSE | 14.55 |
| P31146 | 200 | VBIIEPBKGTVV  | FALSE | TRUE | FALSE | 10.58 |
| P31146 | 201 | BIIEPBKGTVVA  | FALSE | TRUE | FALSE | 11.31 |
| P31146 | 233 | KILTTGFSBMSE  | FALSE | TRUE | FALSE | 14.99 |
| P31146 | 234 | ILTTGFSBMSEB  | FALSE | TRUE | FALSE | 21.68 |
| P31146 | 235 | LTTGFSBMSEBQ  | FALSE | TRUE | FALSE | 32.82 |
| P31146 | 236 | TTGFSBMSEBQV  | FALSE | TRUE | FALSE | 19.04 |
| P31146 | 237 | TGFSBMSEBQVA  | FALSE | TRUE | FALSE | 13.07 |
| P31146 | 238 | GFSBMSEBQVAL  | FALSE | TRUE | FALSE | 28.02 |
| P31146 | 239 | FSBMSEBQVALW  | FALSE | TRUE | FALSE | 21.27 |
| P31146 | 240 | SBMSEBQVALWD  | FALSE | TRUE | FALSE | 18.05 |
| P31146 | 241 | BMSEBQVALWDT  | FALSE | TRUE | FALSE | 14.91 |
| P31146 | 314 | ESQBGMGYMPKB  | FALSE | TRUE | FALSE | 20.38 |
| P31146 | 315 | SQBGMGYMPKBC  | FALSE | TRUE | FALSE | 13.72 |
| P31146 | 316 | QBGMGYMPKBGL  | FALSE | TRUE | FALSE | 11.02 |
| P31146 | 317 | BGMGYMPKBGLE  | FALSE | TRUE | FALSE | 24.96 |
| P31146 | 318 | GMGYMPKBGLEV  | FALSE | TRUE | FALSE | 15.2  |
| P31146 | 319 | MGYMPKBGLEVN  | FALSE | TRUE | FALSE | 10.93 |
| P31146 | 325 | BGLEVNKCEIAB  | FALSE | TRUE | FALSE | 14.26 |
| P31146 | 332 | CEIABFYKLHEB  | FALSE | TRUE | FALSE | 13.17 |
| P31146 | 333 | EIABFYKLHEBB  | FALSE | TRUE | FALSE | 30.04 |
| P31146 | 334 | IABFYKLHEBBC  | FALSE | TRUE | FALSE | 15.78 |
| P31146 | 335 | ABFYKLHEBBCE  | FALSE | TRUE | FALSE | 16.02 |
| P31146 | 336 | BFYKLHEBBCEP  | FALSE | TRUE | FALSE | 15.44 |
| P31146 | 337 | FYKLHEBBCEPI  | FALSE | TRUE | FALSE | 11.97 |
| P31146 | 338 | YKLHEBBCEPIA  | FALSE | TRUE | FALSE | 11.32 |
| P31146 | 339 | KLHEBBCEPIAM  | FALSE | TRUE | FALSE | 13.89 |
| P31146 | 341 | HEBBCEPIAMTV  | FALSE | TRUE | FALSE | 10.52 |
| P31146 | 344 | BCEPIAMTVPBK  | FALSE | TRUE | FALSE | 12.05 |
| P31146 | 378 | EWLGGBDAGPLL  | FALSE | TRUE | FALSE | 16.43 |
| P31146 | 379 | WLGGBDAGPLLI  | FALSE | TRUE | FALSE | 10.58 |
| P31146 | 392 | LKDGYPKSBES   | FALSE | TRUE | FALSE | 11.75 |
| P31146 | 394 | DGYVPPKSBELB  | FALSE | TRUE | FALSE | 24.99 |
| P31146 | 395 | GYVPPKSBELBV  | FALSE | TRUE | FALSE | 42.49 |
| P31146 | 396 | YVPPKSBELBVN  | FALSE | TRUE | FALSE | 29.04 |
| P31146 | 397 | VPPKSBELBVNB  | FALSE | TRUE | FALSE | 18.55 |
| P31146 | 398 | PPKSBELBVNBG  | FALSE | TRUE | FALSE | 22.88 |
| P31146 | 399 | PKSBELBVNBGL  | FALSE | TRUE | FALSE | 14.93 |
| P31146 | 400 | KSBELBVNBGLD  | FALSE | TRUE | FALSE | 36.53 |
| P31146 | 401 | SBELBVNBGLDT  | FALSE | TRUE | FALSE | 54.6  |
| P31146 | 402 | BELBVNBGLDTG  | FALSE | TRUE | FALSE | 44.88 |
| P31146 | 403 | ELBVNBGLDTGB  | FALSE | TRUE | FALSE | 17.36 |
| P31146 | 404 | LBVNBGLDTGGB  | FALSE | TRUE | FALSE | 19.58 |
| P31146 | 405 | BVNBGLDTGGBB  | FALSE | TRUE | FALSE | 10.01 |
| P31146 | 408 | BGLDTGGBBBAAP | FALSE | TRUE | FALSE | 11.47 |
| P31146 | 409 | GLDTGGBBBAAPE | FALSE | TRUE | FALSE | 14.79 |
| P31146 | 410 | LDTGGBBBAAPEA | FALSE | TRUE | FALSE | 12.76 |
| P31146 | 411 | DTGGBBBAAPEAS | FALSE | TRUE | FALSE | 15.47 |
| P31146 | 412 | TGGBBBAAPEASG | FALSE | TRUE | FALSE | 17.97 |
| P31146 | 413 | GBBBAAPEASGT  | FALSE | TRUE | FALSE | 24.53 |
| P31146 | 414 | BBBBAAPEASGTP | FALSE | TRUE | FALSE | 25.55 |

|        |     |              |       |      |       |       |
|--------|-----|--------------|-------|------|-------|-------|
| P31146 | 415 | BBAAPEASGTPS | FALSE | TRUE | FALSE | 17.86 |
| P16410 | 7   | QBHKAQLNLATB | FALSE | TRUE | FALSE | 19.75 |
| P16410 | 11  | AQLNLATBTWPC | FALSE | TRUE | FALSE | 15.68 |
| P16410 | 12  | QLNLATBTWPCT | FALSE | TRUE | FALSE | 20.42 |
| P16410 | 13  | LNLATBTWPCTL | FALSE | TRUE | FALSE | 15.68 |
| P16410 | 65  | KATEVBVTVLBQ | FALSE | TRUE | FALSE | 12.56 |
| P16410 | 68  | EVBVTVLBQADS | FALSE | TRUE | FALSE | 13.7  |
| P16410 | 69  | VBVTVLBQADSQ | FALSE | TRUE | FALSE | 18.86 |
| P16410 | 70  | BVTVLBQADSQV | FALSE | TRUE | FALSE | 18.06 |
| P16410 | 71  | VTVLBQADSQVT | FALSE | TRUE | FALSE | 17.14 |
| P16410 | 72  | TVLBQADSQVTE | FALSE | TRUE | FALSE | 26.11 |
| Q05315 | 53  | HFQVCFGBBVVM | FALSE | TRUE | FALSE | 11.81 |
| Q05315 | 54  | FQVCFGBBVVMN | FALSE | TRUE | FALSE | 13.86 |
| Q05315 | 55  | QVCFGBBVVMNS | FALSE | TRUE | FALSE | 22.26 |
| Q05315 | 56  | VCFGBBVVMNSB | FALSE | TRUE | FALSE | 22.44 |
| Q05315 | 57  | CFGBBVVMNSBE | FALSE | TRUE | FALSE | 45.64 |
| Q05315 | 58  | FGBBVVMNSBEY | FALSE | TRUE | FALSE | 45.67 |
| Q05315 | 59  | GBBVVMNSBEYG | FALSE | TRUE | FALSE | 33.19 |
| Q05315 | 60  | BBVMNSBEYGA  | FALSE | TRUE | FALSE | 25.38 |
| Q05315 | 61  | BVVMNSBEYGAW | FALSE | TRUE | FALSE | 24.12 |
| Q05315 | 62  | VVMNSBEYGAWK | FALSE | TRUE | FALSE | 25.32 |
| Q05315 | 63  | VMNSBEYGAWKQ | FALSE | TRUE | FALSE | 31.12 |
| Q05315 | 64  | MNSBEYGAWKQC | FALSE | TRUE | FALSE | 20.97 |
| Q05315 | 65  | NSBEYGAWKQQV | FALSE | TRUE | FALSE | 15.29 |
| Q05315 | 66  | SBEYGAWKQQVE | FALSE | TRUE | FALSE | 26.48 |
| Q05315 | 67  | BEYGAWKQQVES | FALSE | TRUE | FALSE | 10.83 |
| Q05315 | 104 | VNGQSSYTFDHB | FALSE | TRUE | FALSE | 12.13 |
| Q05315 | 108 | SSYTFDHBKPE  | FALSE | TRUE | FALSE | 10.9  |
| Q05315 | 110 | YTFDHBKPEAV  | FALSE | TRUE | FALSE | 10.49 |
| Q05315 | 111 | TFDHBKPEAVK  | FALSE | TRUE | FALSE | 10.41 |
| P02671 | 30  | EGGGVBGPBVVE | FALSE | TRUE | FALSE | 12.97 |
| P02671 | 31  | GGGVBGPBVVEB | FALSE | TRUE | FALSE | 16.84 |
| P02671 | 32  | GGVBGPBVVEBH | FALSE | TRUE | FALSE | 21.29 |
| P02671 | 33  | GVBGPBVVEBHQ | FALSE | TRUE | FALSE | 23.3  |
| P02671 | 34  | VBGPBVVEBHQ  | FALSE | TRUE | FALSE | 26.28 |
| P02671 | 35  | BGPBVVEBHQSA | FALSE | TRUE | FALSE | 21.86 |
| P02671 | 36  | GPBVVEBHQSA  | FALSE | TRUE | FALSE | 12.63 |
| P02671 | 37  | PBVVEBHQSA   | FALSE | TRUE | FALSE | 14.72 |
| P02671 | 38  | BVVEBHQSA    | FALSE | TRUE | FALSE | 22.96 |
| P02671 | 39  | VVEBHQSA     | FALSE | TRUE | FALSE | 12.06 |
| P02671 | 76  | EVNQDFTNBINK | FALSE | TRUE | FALSE | 11.6  |
| P02671 | 77  | VNQDFTNBINKL | FALSE | TRUE | FALSE | 12.78 |
| P02671 | 106 | TTNIMEILBGDF | FALSE | TRUE | FALSE | 12.46 |
| P02671 | 107 | TNIMEILBGDFS | FALSE | TRUE | FALSE | 13.22 |
| P02671 | 109 | IMEILBGDFSSA | FALSE | TRUE | FALSE | 11.6  |
| P02671 | 110 | MEILBGDFSSAN | FALSE | TRUE | FALSE | 13.57 |
| P02671 | 111 | EILBGDFSSANN | FALSE | TRUE | FALSE | 17.36 |
| P02671 | 112 | ILBGDFSSANNB | FALSE | TRUE | FALSE | 24.4  |
| P02671 | 113 | LBGDFSSANNBD | FALSE | TRUE | FALSE | 31.9  |
| P02671 | 114 | BGDFSSANNBDN | FALSE | TRUE | FALSE | 21.89 |
| P02671 | 118 | SSANNBDNTYNB | FALSE | TRUE | FALSE | 11.14 |
| P02671 | 123 | BDNTYNBVSEDL | FALSE | TRUE | FALSE | 10.9  |

|        |     |              |       |      |       |       |
|--------|-----|--------------|-------|------|-------|-------|
| P02671 | 125 | NTYNBVSEDLBS | FALSE | TRUE | FALSE | 11.01 |
| P02671 | 126 | TYNBVSEDLBSB | FALSE | TRUE | FALSE | 22.33 |
| P02671 | 127 | YNBVSEDLBSBI | FALSE | TRUE | FALSE | 17.82 |
| P02671 | 128 | NBVSEDLBSBIE | FALSE | TRUE | FALSE | 12.4  |
| P02671 | 129 | BVSEDLBSBIEV | FALSE | TRUE | FALSE | 13.02 |
| P02671 | 131 | SEDLBSBIEVLK | FALSE | TRUE | FALSE | 14.07 |
| P02671 | 132 | EDLBSBIEVLKB | FALSE | TRUE | FALSE | 29.35 |
| P02671 | 136 | SBIEVLKBKVIE | FALSE | TRUE | FALSE | 12.48 |
| P02671 | 158 | NVBAQLVDMKBL | FALSE | TRUE | FALSE | 13.12 |
| P02671 | 172 | DIDIKIBSCBGS | FALSE | TRUE | FALSE | 11.18 |
| P02671 | 173 | IDIKIBSCBGSC | FALSE | TRUE | FALSE | 12.39 |
| P02671 | 174 | DIKIBSCBGSCS | FALSE | TRUE | FALSE | 16.8  |
| P02671 | 175 | IKIBSCBGSCSB | FALSE | TRUE | FALSE | 30.78 |
| P02671 | 176 | KIBSCBGSCSBA | FALSE | TRUE | FALSE | 26.86 |
| P02671 | 177 | IBSCBGSCSBAL | FALSE | TRUE | FALSE | 26.19 |
| P02671 | 178 | BSCBGSCSBALA | FALSE | TRUE | FALSE | 22.81 |
| P02671 | 179 | SCBGSCSBALAB | FALSE | TRUE | FALSE | 25    |
| P02671 | 180 | CBGSCSBALABE | FALSE | TRUE | FALSE | 59.06 |
| P02671 | 181 | BGSCSBALABEV | FALSE | TRUE | FALSE | 54.01 |
| P02671 | 182 | GSCSBALABEVD | FALSE | TRUE | FALSE | 23.77 |
| P02671 | 183 | SCSBALABEVDL | FALSE | TRUE | FALSE | 26.28 |
| P02671 | 184 | CSBALABEVDLK | FALSE | TRUE | FALSE | 39.52 |
| P02671 | 185 | SBALABEVDLKD | FALSE | TRUE | FALSE | 26.11 |
| P02671 | 186 | BALABEVDLKDY | FALSE | TRUE | FALSE | 23.07 |
| P02671 | 187 | ALABEVDLKDYE | FALSE | TRUE | FALSE | 13.1  |
| P02671 | 188 | LABEVDLKDYED | FALSE | TRUE | FALSE | 19.62 |
| P02671 | 189 | ABEVDLKDYEDQ | FALSE | TRUE | FALSE | 12.79 |
| P02671 | 208 | IAKDLLPSBDBQ | FALSE | TRUE | FALSE | 15.9  |
| P02671 | 209 | AKDLLPSBDBQH | FALSE | TRUE | FALSE | 12.43 |
| P02671 | 210 | KDLLPSBDBQHL | FALSE | TRUE | FALSE | 14.16 |
| P02671 | 211 | DLLPSBDBQHLP | FALSE | TRUE | FALSE | 15.06 |
| P02671 | 212 | LLPSBDBQHPL  | FALSE | TRUE | FALSE | 22.59 |
| P02671 | 213 | LPSBDBQHPLI  | FALSE | TRUE | FALSE | 23.78 |
| P02671 | 214 | PSBDBQHPLIK  | FALSE | TRUE | FALSE | 14.54 |
| P02671 | 215 | SBDBQHPLIKM  | FALSE | TRUE | FALSE | 27.19 |
| P02671 | 263 | BPGGNEITBGGS | FALSE | TRUE | FALSE | 27.68 |
| P02671 | 264 | PGGNEITBGGST | FALSE | TRUE | FALSE | 23.52 |
| P02671 | 265 | GGNEITBGGSTS | FALSE | TRUE | FALSE | 36.18 |
| P02671 | 266 | GNEITBGGSTSY | FALSE | TRUE | FALSE | 35.47 |
| P02671 | 267 | NEITBGGSTSYG | FALSE | TRUE | FALSE | 40.72 |
| P02671 | 268 | EITBGGSTSYGT | FALSE | TRUE | FALSE | 35    |
| P02671 | 269 | ITBGGSTSYGTG | FALSE | TRUE | FALSE | 42.97 |
| P02671 | 270 | TBGGSTSYGTGS | FALSE | TRUE | FALSE | 32.25 |
| P02671 | 360 | WNPGSSEBGSAG | FALSE | TRUE | FALSE | 10.91 |
| P02671 | 363 | GSSEBGSAGHWT | FALSE | TRUE | FALSE | 12.28 |
| P02671 | 364 | SSEBGSAGHWTS | FALSE | TRUE | FALSE | 12.79 |
| P02671 | 365 | SEBGSAGHWTS  | FALSE | TRUE | FALSE | 12.18 |
| P02671 | 366 | EBGSAGHWTS   | FALSE | TRUE | FALSE | 13.76 |
| P02671 | 367 | BGSAGHWTS    | FALSE | TRUE | FALSE | 10.7  |
| P02671 | 415 | EVSGNVSPGTBB | FALSE | TRUE | FALSE | 12.96 |
| P02671 | 416 | VSGNVSPGTBBE | FALSE | TRUE | FALSE | 18.48 |
| P02671 | 417 | SGNVSPGTBBEY | FALSE | TRUE | FALSE | 20.4  |

|        |     |              |       |      |       |       |
|--------|-----|--------------|-------|------|-------|-------|
| P02671 | 418 | GNVSPGTBBEYH | FALSE | TRUE | FALSE | 33.55 |
| P02671 | 419 | NVSPGTBBEYHT | FALSE | TRUE | FALSE | 32.05 |
| P02671 | 420 | VSPGTBBEYHTE | FALSE | TRUE | FALSE | 39.59 |
| P02671 | 421 | SPGTBBEYHTEK | FALSE | TRUE | FALSE | 43.64 |
| P02671 | 422 | PGTBBEYHTEKL | FALSE | TRUE | FALSE | 28.85 |
| P02671 | 423 | GTBBEYHTEKLV | FALSE | TRUE | FALSE | 50.24 |
| P02671 | 424 | TBBEYHTEKLV  | FALSE | TRUE | FALSE | 39.17 |
| P02671 | 425 | BBEYHTEKLVTS | FALSE | TRUE | FALSE | 24    |
| P02671 | 441 | ELBTGKEKVTSG | FALSE | TRUE | FALSE | 12.31 |
| P02671 | 447 | EKVTSGSTTTTB | FALSE | TRUE | FALSE | 11.03 |
| P02671 | 448 | KVTSGSTTTTBB | FALSE | TRUE | FALSE | 21.12 |
| P02671 | 449 | VTSGSTTTTBBS | FALSE | TRUE | FALSE | 18.99 |
| P02671 | 451 | SGSTTTTBBS   | FALSE | TRUE | FALSE | 10.75 |
| P02671 | 453 | STTTTBBSCKT  | FALSE | TRUE | FALSE | 15.1  |
| P02671 | 454 | TTTTBBSCKTV  | FALSE | TRUE | FALSE | 12.23 |
| P02671 | 455 | TTTBBSCKTVT  | FALSE | TRUE | FALSE | 10.7  |
| P02671 | 501 | SGIGLDGFBHB  | FALSE | TRUE | FALSE | 22.13 |
| P02671 | 502 | GIGLDGFBHBH  | FALSE | TRUE | FALSE | 11.84 |
| P02671 | 503 | IGTLDGFBHBHP | FALSE | TRUE | FALSE | 19    |
| P02671 | 504 | GTLDGFBHBHPD | FALSE | TRUE | FALSE | 20.41 |
| P02671 | 505 | TLDGFBHBHPDE | FALSE | TRUE | FALSE | 19.51 |
| P02671 | 506 | LDGFBHBHPDEA | FALSE | TRUE | FALSE | 10.99 |
| P02671 | 508 | GFBHBHPDEAAF | FALSE | TRUE | FALSE | 22.89 |
| P02671 | 538 | GEFVSETESBGS | FALSE | TRUE | FALSE | 14.89 |
| P02671 | 539 | EFVSETESBGSE | FALSE | TRUE | FALSE | 13.89 |
| P02671 | 540 | FVSETESBGSES | FALSE | TRUE | FALSE | 22.2  |
| P02671 | 541 | VSETESBGSESG | FALSE | TRUE | FALSE | 25.6  |
| P02671 | 542 | SETESBGSESGI | FALSE | TRUE | FALSE | 31.31 |
| P02671 | 543 | ETESBGSESGIF | FALSE | TRUE | FALSE | 27.52 |
| P02671 | 544 | TESBGSESGIFT | FALSE | TRUE | FALSE | 29.4  |
| P02671 | 545 | ESBGSESGIFTN | FALSE | TRUE | FALSE | 21.71 |
| P02671 | 546 | SBGSESGIFTNT | FALSE | TRUE | FALSE | 19.79 |
| P02671 | 563 | HHPGIAEFPSBG | FALSE | TRUE | FALSE | 23.72 |
| P02671 | 564 | HPGIAEFPSBGK | FALSE | TRUE | FALSE | 22.16 |
| P02671 | 565 | PGIAEFPSBGKS | FALSE | TRUE | FALSE | 15.48 |
| P02671 | 566 | GIAEFPSBGKSS | FALSE | TRUE | FALSE | 22.41 |
| P02671 | 567 | IAEFPSBGKSSS | FALSE | TRUE | FALSE | 31.02 |
| P02671 | 568 | AEFPSBGKSSSY | FALSE | TRUE | FALSE | 17.54 |
| P02671 | 569 | EFPSBGKSSSYS | FALSE | TRUE | FALSE | 21.5  |
| P02671 | 582 | QFTSSTSYNBGD | FALSE | TRUE | FALSE | 13.44 |
| P02671 | 583 | FTSSTSYNBGDS | FALSE | TRUE | FALSE | 20.81 |
| P02671 | 584 | TSSTSYNBGDST | FALSE | TRUE | FALSE | 34.54 |
| P02671 | 585 | SSTSYNBGDSTF | FALSE | TRUE | FALSE | 27.94 |
| P02671 | 586 | STSYNBGDSTFE | FALSE | TRUE | FALSE | 30.73 |
| P02671 | 587 | TSYNBGDSTFES | FALSE | TRUE | FALSE | 32.22 |
| P02671 | 588 | SYNBGDSTFESK | FALSE | TRUE | FALSE | 24.26 |
| P02671 | 589 | YNBGDSTFESKS | FALSE | TRUE | FALSE | 23.5  |
| P02671 | 590 | NBGDSTFESKSY | FALSE | TRUE | FALSE | 13.98 |
| P02671 | 612 | DHEGTHSTKBGH | FALSE | TRUE | FALSE | 10.02 |
| P02671 | 613 | HEGTHSTKBGHA | FALSE | TRUE | FALSE | 11.34 |
| P02671 | 621 | BGHAKSBPVDC  | FALSE | TRUE | FALSE | 13.68 |
| P02671 | 676 | QQBMDGSLNFNB | FALSE | TRUE | FALSE | 18.28 |

|        |     |               |       |      |       |       |
|--------|-----|---------------|-------|------|-------|-------|
| P02671 | 677 | QBMDGSLNFNBT  | FALSE | TRUE | FALSE | 19.68 |
| P02671 | 678 | BMDGSLNFNBTW  | FALSE | TRUE | FALSE | 10.76 |
| P02671 | 683 | LNFNBTWQDYKB  | FALSE | TRUE | FALSE | 14.48 |
| P02671 | 684 | NFNBTWQDYKKBG | FALSE | TRUE | FALSE | 15.61 |
| P02671 | 685 | FNBTWQDYKKBGF | FALSE | TRUE | FALSE | 11.05 |
| P02671 | 686 | NBTWQDYKKBGFG | FALSE | TRUE | FALSE | 13.14 |
| P02671 | 687 | BTWQDYKKBGFGS | FALSE | TRUE | FALSE | 13.71 |
| P02671 | 688 | TWQDYKKBGFGSL | FALSE | TRUE | FALSE | 10.11 |
| P02671 | 690 | QDYKKBGFGSLND | FALSE | TRUE | FALSE | 16.39 |
| P02671 | 691 | DYKKBGFGSLNDE | FALSE | TRUE | FALSE | 16.73 |
| P02671 | 692 | YKKBGFGSLNDEG | FALSE | TRUE | FALSE | 18.59 |
| P02671 | 693 | KKBGFGSLNDEGE | FALSE | TRUE | FALSE | 11.58 |
| P02671 | 710 | GNDYLHLLTQBG  | FALSE | TRUE | FALSE | 10.4  |
| P02671 | 712 | DYLHLLTQBGSV  | FALSE | TRUE | FALSE | 18.77 |
| P02671 | 713 | YLHLLTQBGSVL  | FALSE | TRUE | FALSE | 10.9  |
| P02671 | 714 | LHLLTQBGSVLB  | FALSE | TRUE | FALSE | 16.21 |
| P02671 | 715 | HLLTQBGSVLBV  | FALSE | TRUE | FALSE | 12.99 |
| P02671 | 716 | LLTQBGSVLBVE  | FALSE | TRUE | FALSE | 23.69 |
| P02671 | 717 | LTQBGSVLBVEL  | FALSE | TRUE | FALSE | 11.36 |
| P02671 | 718 | TQBGSVLBVELE  | FALSE | TRUE | FALSE | 20.82 |
| P02671 | 719 | QBGSVLBVELED  | FALSE | TRUE | FALSE | 26.84 |
| P02671 | 732 | AGNEAYAHEYHFB | FALSE | TRUE | FALSE | 16.74 |
| P02671 | 737 | YAEYHFBVGSEA  | FALSE | TRUE | FALSE | 15.06 |
| P02671 | 738 | AEYHFBVGSEAE  | FALSE | TRUE | FALSE | 25.8  |
| P02671 | 739 | EYHFBVGSEAEG  | FALSE | TRUE | FALSE | 28.55 |
| P02671 | 740 | YHFBVGSEAEGY  | FALSE | TRUE | FALSE | 13.77 |
| P02671 | 742 | FBVGSEAEGYAL  | FALSE | TRUE | FALSE | 12.22 |
| P02671 | 819 | GIYYPGGSYDPB  | FALSE | TRUE | FALSE | 16.45 |
| P02671 | 820 | IYYPGGSYDPBN  | FALSE | TRUE | FALSE | 16.09 |
| P02671 | 821 | YYPGGSYDPBNN  | FALSE | TRUE | FALSE | 15.41 |
| P02671 | 822 | YPGGSYDPBNNS  | FALSE | TRUE | FALSE | 12.79 |
| P02671 | 824 | GGSYDPBNNSPY  | FALSE | TRUE | FALSE | 10.62 |
| P02671 | 841 | VVWVSFBGADYS  | FALSE | TRUE | FALSE | 17.04 |
| P02671 | 842 | VWVSFBGADYSL  | FALSE | TRUE | FALSE | 13.95 |
| P02671 | 843 | WVSFBGADYSLB  | FALSE | TRUE | FALSE | 34.66 |
| P02671 | 844 | VSFBGADYSLBA  | FALSE | TRUE | FALSE | 68.48 |
| P02671 | 845 | SFBGADYSLBAV  | FALSE | TRUE | FALSE | 50.63 |
| P02671 | 846 | FBGADYSLBAVB  | FALSE | TRUE | FALSE | 37.77 |
| P02671 | 847 | BGADYSLBAVBM  | FALSE | TRUE | FALSE | 40.73 |
| P02671 | 848 | GADYSLBAVBMK  | FALSE | TRUE | FALSE | 27.5  |
| P02671 | 849 | ADYSLBAVBMKI  | FALSE | TRUE | FALSE | 26.44 |
| P02671 | 850 | DYSLBAVBMKIB  | FALSE | TRUE | FALSE | 26.19 |
| P02671 | 851 | YSLBAVBMKIBP  | FALSE | TRUE | FALSE | 16.33 |
| P02671 | 852 | SLBAVBMKIBPL  | FALSE | TRUE | FALSE | 16.13 |
| P02671 | 853 | LBAVBMKIBPLV  | FALSE | TRUE | FALSE | 16.73 |
| P02671 | 854 | BAVBMKIBPLVT  | FALSE | TRUE | FALSE | 10.43 |
| P02675 | 33  | VNDNEEGFFSAB  | FALSE | TRUE | FALSE | 17.61 |
| P02675 | 34  | NDNEEGFFSABG  | FALSE | TRUE | FALSE | 20.05 |
| P02675 | 35  | DNEEGFFSABGH  | FALSE | TRUE | FALSE | 32.77 |
| P02675 | 36  | NEEGFFSABGHB  | FALSE | TRUE | FALSE | 32.18 |
| P02675 | 37  | EEGFFSABGHBP  | FALSE | TRUE | FALSE | 38.52 |
| P02675 | 38  | EGFFSABGHBPL  | FALSE | TRUE | FALSE | 42.28 |

|        |     |              |       |      |       |       |
|--------|-----|--------------|-------|------|-------|-------|
| P02675 | 39  | GFFSABGHBLD  | FALSE | TRUE | FALSE | 44.9  |
| P02675 | 40  | FFSABGHBLDK  | FALSE | TRUE | FALSE | 36.08 |
| P02675 | 41  | FSABGHBLDKK  | FALSE | TRUE | FALSE | 13.68 |
| P02675 | 42  | SABGHBLDKKB  | FALSE | TRUE | FALSE | 11.59 |
| P02675 | 43  | ABGHBLDKKBE  | FALSE | TRUE | FALSE | 15.38 |
| P02675 | 44  | BGHBLDKKBEE  | FALSE | TRUE | FALSE | 18.33 |
| P02675 | 62  | APPPISGGGYBA | FALSE | TRUE | FALSE | 10.92 |
| P02675 | 63  | PPPISGGGYBAB | FALSE | TRUE | FALSE | 18.21 |
| P02675 | 64  | PPISGGGYBABP | FALSE | TRUE | FALSE | 10.85 |
| P02675 | 275 | ENGGWTVIQNBQ | FALSE | TRUE | FALSE | 14.52 |
| P02675 | 276 | NGGWTVIQNBQD | FALSE | TRUE | FALSE | 13.03 |
| P02675 | 277 | GGWTVIQNBQDG | FALSE | TRUE | FALSE | 17.81 |
| P02675 | 278 | GWTVIQNBQDGS | FALSE | TRUE | FALSE | 18.91 |
| P02675 | 279 | WTVIQNBQDGSV | FALSE | TRUE | FALSE | 18.4  |
| P02675 | 280 | TVIQNBQDGSVD | FALSE | TRUE | FALSE | 17.27 |
| P02675 | 281 | VIQNBQDGSVDF | FALSE | TRUE | FALSE | 21.35 |
| P02675 | 282 | IQNBQDGSVDFG | FALSE | TRUE | FALSE | 23.04 |
| P02675 | 283 | QNBQDGSVDFGB | FALSE | TRUE | FALSE | 17.62 |
| P02675 | 284 | NBQDGSVDFGBK | FALSE | TRUE | FALSE | 19.97 |
| P02675 | 285 | BQDGSVDFGBKW | FALSE | TRUE | FALSE | 18.23 |
| P02675 | 286 | QDGSVDFGBKWD | FALSE | TRUE | FALSE | 10.03 |
| P02675 | 323 | WLGNDKISQLTB | FALSE | TRUE | FALSE | 12    |
| P02675 | 325 | GNDKISQLTBMG | FALSE | TRUE | FALSE | 11.72 |
| P02675 | 326 | NDKISQLTBMGP | FALSE | TRUE | FALSE | 15.66 |
| P02675 | 327 | DKISQLTBMGPT | FALSE | TRUE | FALSE | 17.53 |
| P02675 | 328 | KISQLTBMGPTE | FALSE | TRUE | FALSE | 19.78 |
| P02675 | 329 | ISQLTBMGPTEL | FALSE | TRUE | FALSE | 28.49 |
| P02675 | 330 | SQLTBMGPTELL | FALSE | TRUE | FALSE | 32.65 |
| P02675 | 331 | QLTBMGPTELLI | FALSE | TRUE | FALSE | 26.49 |
| P02675 | 332 | LTBMGPTELLIE | FALSE | TRUE | FALSE | 15.94 |
| P02675 | 369 | QISVNKYBGTAG | FALSE | TRUE | FALSE | 10.84 |
| P02675 | 371 | SVNKYBGTAGNA | FALSE | TRUE | FALSE | 11.08 |
| P02675 | 373 | NKYBGTAGNALM | FALSE | TRUE | FALSE | 13.16 |
| P02675 | 374 | KYBGTAGNALMD | FALSE | TRUE | FALSE | 14.71 |
| P02675 | 375 | YBGTAGNALMDG | FALSE | TRUE | FALSE | 20.99 |
| P02675 | 434 | YNBCHAANPNGB | FALSE | TRUE | FALSE | 20.78 |
| P02675 | 435 | NBCHAANPNGBY | FALSE | TRUE | FALSE | 18.27 |
| P02679 | 20  | LSSTCVAYVATB | FALSE | TRUE | FALSE | 10.61 |
| P02679 | 21  | SSTCVAYVATBD | FALSE | TRUE | FALSE | 10.08 |
| P02679 | 22  | STCVAYVATBDN | FALSE | TRUE | FALSE | 12.11 |
| P02679 | 25  | VAYVATBDNCCI | FALSE | TRUE | FALSE | 10.1  |
| P02679 | 27  | YVATBDNCCILD | FALSE | TRUE | FALSE | 13.32 |
| P02679 | 28  | VATBDNCCILDE | FALSE | TRUE | FALSE | 11.04 |
| P02679 | 109 | TLKSBKMLEEIM | FALSE | TRUE | FALSE | 14.41 |
| P02679 | 112 | SBKMLEEIMKYE | FALSE | TRUE | FALSE | 10.63 |
| P02679 | 218 | TVFQKBLDGSVD | FALSE | TRUE | FALSE | 11.04 |
| P02679 | 219 | VFQKBLDGSVDF | FALSE | TRUE | FALSE | 12.13 |
| P02679 | 220 | FQKBLDGSVDFK | FALSE | TRUE | FALSE | 10.94 |
| P02679 | 262 | ISTQSAIPYALB | FALSE | TRUE | FALSE | 11.07 |
| P02679 | 271 | ALBVELEDWNGB | FALSE | TRUE | FALSE | 13.11 |
| P02679 | 272 | LBVELEDWNGBT | FALSE | TRUE | FALSE | 10.57 |
| P02679 | 273 | BVELEDWNGBTS | FALSE | TRUE | FALSE | 16.76 |



|        |     |              |       |       |       |       |
|--------|-----|--------------|-------|-------|-------|-------|
| P02679 | 275 | ELEDWNGBTSTA | FALSE | TRUE  | FALSE | 10.31 |
| P02679 | 277 | EDWNGBTSTADY | FALSE | TRUE  | FALSE | 13.08 |
| P02679 | 316 | FDGDFGDDPSD  | TRUE  | FALSE | FALSE | 10.1  |
| P02679 | 317 | DGDFGDDPSDK  | TRUE  | FALSE | FALSE | 10.46 |
| P02679 | 411 | KIIPFNBLTIGE | FALSE | TRUE  | FALSE | 11.4  |
| P02679 | 412 | IIPFNBLTIGEG | FALSE | TRUE  | FALSE | 13.42 |
| P02679 | 413 | IPFNBLTIGEGQ | FALSE | TRUE  | FALSE | 14.41 |
| P02679 | 414 | PFNBLTIGEGQQ | FALSE | TRUE  | FALSE | 12.61 |
| P02679 | 415 | FNBLTIGEGQQH | FALSE | TRUE  | FALSE | 12.64 |
| P02751 | 73  | ALVCTCYGGSBG | FALSE | TRUE  | FALSE | 19.91 |
| P02751 | 74  | LVCTCYGGSBGF | FALSE | TRUE  | FALSE | 12.52 |
| P02751 | 75  | VCTCYGGSBGFN | FALSE | TRUE  | FALSE | 12.98 |
| P02751 | 79  | YGGSBGFNCESK | FALSE | TRUE  | FALSE | 17.88 |
| P02751 | 80  | GGSBGFNCESKP | FALSE | TRUE  | FALSE | 17.32 |
| P02751 | 100 | KYTGNTYBVGDT | FALSE | TRUE  | FALSE | 12.76 |
| P02751 | 102 | TGNTYBVGDYEB | FALSE | TRUE  | FALSE | 11.58 |
| P02751 | 103 | GNTYBVGDYEB  | FALSE | TRUE  | FALSE | 15.21 |
| P02751 | 105 | TYBVGDYEBPK  | FALSE | TRUE  | FALSE | 18.08 |
| P02751 | 106 | YBVGDYEBPKD  | FALSE | TRUE  | FALSE | 11.95 |
| P02751 | 122 | DCTCIGAGBGBI | FALSE | TRUE  | FALSE | 15.92 |
| P02751 | 123 | CTCIGAGBGBIS | FALSE | TRUE  | FALSE | 23.86 |
| P02751 | 124 | TCIGAGBGBISC | FALSE | TRUE  | FALSE | 25.66 |
| P02751 | 125 | CIGAGBGBISCT | FALSE | TRUE  | FALSE | 30.76 |
| P02751 | 126 | IGAGBGBISCTI | FALSE | TRUE  | FALSE | 20.24 |
| P02751 | 127 | GAGBGBISCTIA | FALSE | TRUE  | FALSE | 13.12 |
| P02751 | 128 | AGBGBISCTIAN | FALSE | TRUE  | FALSE | 22.31 |
| P02751 | 129 | GBGBISCTIANB | FALSE | TRUE  | FALSE | 33.42 |
| P02751 | 130 | BGBISCTIANBC | FALSE | TRUE  | FALSE | 23.67 |
| P02751 | 145 | GQSYKIGDTWBB | FALSE | TRUE  | FALSE | 14.44 |
| P02751 | 149 | KIGDTWBBPHET | FALSE | TRUE  | FALSE | 10.24 |
| P02751 | 217 | GEGSGBITCTSB | FALSE | TRUE  | FALSE | 13.89 |
| P02751 | 218 | EGSGBITCTSBN | FALSE | TRUE  | FALSE | 18.73 |
| P02751 | 219 | GSGBITCTSBNB | FALSE | TRUE  | FALSE | 31.56 |
| P02751 | 220 | SGBITCTSBNBC | FALSE | TRUE  | FALSE | 19.3  |
| P02751 | 221 | GBITCTSBNBCN | FALSE | TRUE  | FALSE | 20.01 |
| P02751 | 222 | BITCTSBNBCND | FALSE | TRUE  | FALSE | 19    |
| P02751 | 223 | ITCTSBNBCNDQ | FALSE | TRUE  | FALSE | 17.17 |
| P02751 | 224 | TCTSBNBCNDQD | FALSE | TRUE  | FALSE | 16.94 |
| P02751 | 225 | CTSBNBCNDQDT | FALSE | TRUE  | FALSE | 18.99 |
| P02751 | 226 | TSBNBCNDQDTB | FALSE | TRUE  | FALSE | 16.82 |
| P02751 | 227 | SBNBCNDQDTBT | FALSE | TRUE  | FALSE | 18.08 |
| P02751 | 228 | BNBCNDQDTBTS | FALSE | TRUE  | FALSE | 12.35 |
| P02751 | 229 | NBCNDQDTBTSY | FALSE | TRUE  | FALSE | 10.49 |
| P02751 | 230 | BCNDQDTBTSYB | FALSE | TRUE  | FALSE | 15.68 |
| P02751 | 231 | CNDQDTBTSYBI | FALSE | TRUE  | FALSE | 12.82 |
| P02751 | 232 | NDQDTBTSYBIG | FALSE | TRUE  | FALSE | 16.25 |
| P02751 | 233 | DQDTBTSYBIGD | FALSE | TRUE  | FALSE | 13.22 |
| P02751 | 234 | QDTBTSYBIGDT | FALSE | TRUE  | FALSE | 19.53 |
| P02751 | 235 | DTBTSYBIGDTW | FALSE | TRUE  | FALSE | 14.28 |
| P02751 | 236 | TBTSYBIGDTWS | FALSE | TRUE  | FALSE | 11.22 |
| P02751 | 237 | BTSYBIGDTWSK | FALSE | TRUE  | FALSE | 16.76 |
| P02751 | 239 | SYBIGDTWSKKD | FALSE | TRUE  | FALSE | 17.13 |

|        |     |              |       |      |       |       |
|--------|-----|--------------|-------|------|-------|-------|
| P02751 | 240 | YBIGDTWSKKDN | FALSE | TRUE | FALSE | 15.31 |
| P02751 | 241 | BIGDTWSKKDNB | FALSE | TRUE | FALSE | 19.39 |
| P02751 | 249 | KDNBGNLLQCIC | FALSE | TRUE | FALSE | 10.24 |
| P02751 | 250 | DNBGNLLQCICT | FALSE | TRUE | FALSE | 11.87 |
| P02751 | 251 | NBGNLLQCICTG | FALSE | TRUE | FALSE | 13.96 |
| P02751 | 252 | BGNLLQCICTGN | FALSE | TRUE | FALSE | 10.79 |
| P02751 | 255 | LLQCICTGNGBG | FALSE | TRUE | FALSE | 12.47 |
| P02751 | 258 | CICTGNGBGEWK | FALSE | TRUE | FALSE | 16.69 |
| P02751 | 259 | ICTGNGBGEWKC | FALSE | TRUE | FALSE | 12.89 |
| P02751 | 260 | CTGNGBGEWKCE | FALSE | TRUE | FALSE | 13.58 |
| P02751 | 261 | TGNGBGEWKCEB | FALSE | TRUE | FALSE | 20.06 |
| P02751 | 262 | GNGBGEWKCEBH | FALSE | TRUE | FALSE | 31.57 |
| P02751 | 263 | NGBGEWKCEBHT | FALSE | TRUE | FALSE | 29.1  |
| P02751 | 264 | GBGEWKCEBHTS | FALSE | TRUE | FALSE | 35.4  |
| P02751 | 265 | BGEWKCEBHTSV | FALSE | TRUE | FALSE | 26.48 |
| P02751 | 266 | GEWKCEBHTSVQ | FALSE | TRUE | FALSE | 12.44 |
| P02751 | 267 | EWKCEBHTSVQT | FALSE | TRUE | FALSE | 10.07 |
| P02751 | 268 | WKCEBHTSVQTT | FALSE | TRUE | FALSE | 14.3  |
| P02751 | 269 | KCEBHTSVQTTS | FALSE | TRUE | FALSE | 13.65 |
| P02751 | 270 | CEBHTSVQTTSS | FALSE | TRUE | FALSE | 10.29 |
| P02751 | 271 | EBHTSVQTTSSG | FALSE | TRUE | FALSE | 11.08 |
| P02751 | 284 | GPFTDVBAAVYQ | FALSE | TRUE | FALSE | 13.32 |
| P02751 | 286 | FTDVBAAVYQPQ | FALSE | TRUE | FALSE | 13.88 |
| P02751 | 287 | TDVBAAVYQPQP | FALSE | TRUE | FALSE | 12.14 |
| P02751 | 288 | DVBAAVYQPQPH | FALSE | TRUE | FALSE | 10.86 |
| P02751 | 358 | EPCVLPFTYNGB | FALSE | TRUE | FALSE | 14.13 |
| P02751 | 368 | GBTFYSCCTEGB | FALSE | TRUE | FALSE | 10.51 |
| P02751 | 369 | BTFYSCCTEGBQ | FALSE | TRUE | FALSE | 13.08 |
| P02751 | 372 | YSCTTEGBQDGH | FALSE | TRUE | FALSE | 13.48 |
| P02751 | 373 | SCTTEGBQDGH  | FALSE | TRUE | FALSE | 10.21 |
| P02751 | 377 | EGBQDGHLCWST | FALSE | TRUE | FALSE | 10.88 |
| P02751 | 378 | GBQDGHLCWSTT | FALSE | TRUE | FALSE | 13.68 |
| P02751 | 401 | CTDHTVLVQTBG | FALSE | TRUE | FALSE | 13.68 |
| P02751 | 402 | TDHTVLVQTBGG | FALSE | TRUE | FALSE | 14.82 |
| P02751 | 403 | DHTVLVQTBGGN | FALSE | TRUE | FALSE | 23.93 |
| P02751 | 404 | HTVLVQTBGGNS | FALSE | TRUE | FALSE | 33.64 |
| P02751 | 405 | TVLVQTBGGNSN | FALSE | TRUE | FALSE | 39.44 |
| P02751 | 406 | VLVQTBGGNSNG | FALSE | TRUE | FALSE | 41.06 |
| P02751 | 407 | LVQTBGGNSNGA | FALSE | TRUE | FALSE | 52.82 |
| P02751 | 408 | VQTBGGNSNGAL | FALSE | TRUE | FALSE | 35.3  |
| P02751 | 409 | QTBGGNSNGALC | FALSE | TRUE | FALSE | 22.75 |
| P02751 | 410 | TBGGNSNGALCH | FALSE | TRUE | FALSE | 18.91 |
| P02751 | 434 | CTSEGBBDNMKW | FALSE | TRUE | FALSE | 10.53 |
| P02751 | 435 | TSEGBBDNMKWC | FALSE | TRUE | FALSE | 10.47 |
| P02751 | 436 | SEGBBDNMKWCG | FALSE | TRUE | FALSE | 12.91 |
| P02751 | 437 | EGBBDNMKWCGT | FALSE | TRUE | FALSE | 13.15 |
| P02751 | 438 | GBBDNMKWCGTT | FALSE | TRUE | FALSE | 26.04 |
| P02751 | 439 | BBDNMKWCGTTQ | FALSE | TRUE | FALSE | 17.08 |
| P02751 | 474 | EGVMYBIGDQWD | FALSE | TRUE | FALSE | 10.7  |
| P02751 | 475 | GVMYBIGDQWDK | FALSE | TRUE | FALSE | 15.62 |
| P02751 | 476 | VMYBIGDQWDKQ | FALSE | TRUE | FALSE | 15.02 |
| P02751 | 492 | HMMBCTCVGNGB | FALSE | TRUE | FALSE | 10.57 |

|        |     |              |       |      |       |       |
|--------|-----|--------------|-------|------|-------|-------|
| P02751 | 493 | MMBCTCVGNGBG | FALSE | TRUE | FALSE | 12.25 |
| P02751 | 494 | MBCTCVGNGBGE | FALSE | TRUE | FALSE | 10.8  |
| P02751 | 510 | AYSQBDQCIVD  | FALSE | TRUE | FALSE | 10.46 |
| P02751 | 523 | ITYNVNDTFHKB | FALSE | TRUE | FALSE | 10.34 |
| P02751 | 524 | TYNVNDTFHKBH | FALSE | TRUE | FALSE | 11.06 |
| P02751 | 525 | YNVNDTFHKBHE | FALSE | TRUE | FALSE | 20.76 |
| P02751 | 526 | NVNDTFHKBHEE | FALSE | TRUE | FALSE | 16.41 |
| P02751 | 527 | VNDTFHKBHEEG | FALSE | TRUE | FALSE | 17.32 |
| P02751 | 528 | NDTFHKBHEEGH | FALSE | TRUE | FALSE | 17.64 |
| P02751 | 529 | DTFHKBHEEGHM | FALSE | TRUE | FALSE | 23.51 |
| P02751 | 530 | TFHKBHEEGHML | FALSE | TRUE | FALSE | 21.99 |
| P02751 | 531 | FHKBHEEGHMLN | FALSE | TRUE | FALSE | 24.26 |
| P02751 | 532 | HKBHEEGHMLNC | FALSE | TRUE | FALSE | 19.68 |
| P02751 | 533 | KBHEEGHMLNCT | FALSE | TRUE | FALSE | 18.96 |
| P02751 | 539 | HMLNCTCFGQGB | FALSE | TRUE | FALSE | 11.67 |
| P02751 | 540 | MLNCTCFGQGBG | FALSE | TRUE | FALSE | 15.69 |
| P02751 | 541 | LNCTCFGQGBGB | FALSE | TRUE | FALSE | 12.63 |
| P02751 | 542 | NCTCFGQGBGBW | FALSE | TRUE | FALSE | 12.61 |
| P02751 | 543 | CTCFGQGBGBWK | FALSE | TRUE | FALSE | 10.37 |
| P02751 | 544 | TCFGQGBGBWKC | FALSE | TRUE | FALSE | 19.83 |
| P02751 | 545 | CFGQGBGBWKCD | FALSE | TRUE | FALSE | 20.87 |
| P02751 | 546 | FGQGBGBWKCDP | FALSE | TRUE | FALSE | 34.45 |
| P02751 | 547 | GQGBGBWKCDPV | FALSE | TRUE | FALSE | 38.53 |
| P02751 | 548 | QGBGBWKCDPVD | FALSE | TRUE | FALSE | 34.12 |
| P02751 | 549 | GBGBWKCDPVDQ | FALSE | TRUE | FALSE | 25.97 |
| P02751 | 550 | BGBWKCDPVDQC | FALSE | TRUE | FALSE | 12.87 |
| P02751 | 581 | HGVBYQCYCYGB | FALSE | TRUE | FALSE | 11.32 |
| P02751 | 582 | GVBYQCYCYGBG | FALSE | TRUE | FALSE | 17.46 |
| P02751 | 583 | VBYQCYCYGBGI | FALSE | TRUE | FALSE | 17.28 |
| P02751 | 584 | BYQCYCYGBGIG | FALSE | TRUE | FALSE | 13.12 |
| P02751 | 585 | YQCYCYGBGIGE | FALSE | TRUE | FALSE | 10.68 |
| P02751 | 590 | YGBGIGEWHCQP | FALSE | TRUE | FALSE | 11.72 |
| P02751 | 591 | GBGIGEWHCQPL | FALSE | TRUE | FALSE | 16.62 |
| P02751 | 642 | ILBWBPKNSVGB | FALSE | TRUE | FALSE | 10.52 |
| P02751 | 650 | SVGBWKEATIPG | FALSE | TRUE | FALSE | 11.82 |
| P02751 | 651 | VGBWKEATIPGH | FALSE | TRUE | FALSE | 15.41 |
| P02751 | 652 | GBWKEATIPGHL | FALSE | TRUE | FALSE | 10.57 |
| P02751 | 683 | SIQQYGHQEVTB | FALSE | TRUE | FALSE | 11.63 |
| P02751 | 684 | IQQYGHQEVTBF | FALSE | TRUE | FALSE | 10.15 |
| P02751 | 828 | VVBWSBPQAPIT | FALSE | TRUE | FALSE | 18.06 |
| P02751 | 829 | VBWSBPQAPITG | FALSE | TRUE | FALSE | 20.07 |
| P02751 | 830 | BWSBPQAPITGY | FALSE | TRUE | FALSE | 10.97 |
| P02751 | 831 | WSBPQAPITGYB | FALSE | TRUE | FALSE | 13.42 |
| P02751 | 947 | PGEHGQBLPISB | FALSE | TRUE | FALSE | 11.91 |
| P02751 | 948 | GEHGQBLPISBN | FALSE | TRUE | FALSE | 26.32 |
| P02751 | 949 | EHGQBLPISBNT | FALSE | TRUE | FALSE | 20.29 |
| P02751 | 950 | HGQBLPISBNTF | FALSE | TRUE | FALSE | 25.66 |
| P02751 | 951 | GQBLPISBNTFA | FALSE | TRUE | FALSE | 25.57 |
| P02751 | 952 | QBLPISBNTFAE | FALSE | TRUE | FALSE | 27.7  |
| P02751 | 953 | BLPISBNTFAEV | FALSE | TRUE | FALSE | 19.45 |
| P02751 | 954 | LPIBNTFAEVT  | FALSE | TRUE | FALSE | 20.06 |
| P02751 | 955 | PISBNTFAEVTG | FALSE | TRUE | FALSE | 12.25 |

|        |      |              |       |      |       |       |
|--------|------|--------------|-------|------|-------|-------|
| P02751 | 956  | ISBNTFAEVTGL | FALSE | TRUE | FALSE | 10.1  |
| P02751 | 977  | VFAVSHGBESKP | FALSE | TRUE | FALSE | 14.95 |
| P02751 | 978  | FAVSHGBESKPL | FALSE | TRUE | FALSE | 18.27 |
| P02751 | 979  | AVSHGBESKPLT | FALSE | TRUE | FALSE | 23.53 |
| P02751 | 980  | VSHGBESKPLTA | FALSE | TRUE | FALSE | 13.34 |
| P02751 | 981  | SHGBESKPLTAQ | FALSE | TRUE | FALSE | 18.16 |
| P02751 | 982  | HGBESKPLTAQQ | FALSE | TRUE | FALSE | 32.38 |
| P02751 | 983  | GBESKPLTAQQT | FALSE | TRUE | FALSE | 13.38 |
| P02751 | 1012 | TVLVBWTPPBAQ | FALSE | TRUE | FALSE | 10.53 |
| P02751 | 1013 | VLVBWTPPBAQI | FALSE | TRUE | FALSE | 19.47 |
| P02751 | 1014 | LVBWTPPBAQIT | FALSE | TRUE | FALSE | 24.81 |
| P02751 | 1015 | VBWTPPBAQITG | FALSE | TRUE | FALSE | 25.45 |
| P02751 | 1016 | BWTPPBAQITGY | FALSE | TRUE | FALSE | 17.99 |
| P02751 | 1017 | WTPPBAQITGYB | FALSE | TRUE | FALSE | 24.86 |
| P02751 | 1018 | TPPBAQITGYBL | FALSE | TRUE | FALSE | 12.33 |
| P02751 | 1019 | PPBAQITGYBLT | FALSE | TRUE | FALSE | 11.23 |
| P02751 | 1025 | TGYBLTVGLTBB | FALSE | TRUE | FALSE | 12.99 |
| P02751 | 1026 | GYBLTVGLTBBG | FALSE | TRUE | FALSE | 18.22 |
| P02751 | 1027 | YBLTVGLTBBGQ | FALSE | TRUE | FALSE | 39.87 |
| P02751 | 1028 | BLTVGLTBBGQP | FALSE | TRUE | FALSE | 63.84 |
| P02751 | 1029 | LTVGLTBBGQPB | FALSE | TRUE | FALSE | 44.13 |
| P02751 | 1030 | TVGLTBBGQPBQ | FALSE | TRUE | FALSE | 65.23 |
| P02751 | 1031 | VGLTBBGQPBQY | FALSE | TRUE | FALSE | 55.43 |
| P02751 | 1032 | GLTBBGQPBQYN | FALSE | TRUE | FALSE | 51.11 |
| P02751 | 1033 | LTBBGQPBQYNV | FALSE | TRUE | FALSE | 59.87 |
| P02751 | 1034 | TBBGQPBQYNVG | FALSE | TRUE | FALSE | 48.7  |
| P02751 | 1035 | BBGQPBQYNVGP | FALSE | TRUE | FALSE | 48.65 |
| P02751 | 1036 | BGQPBQYNVGPS | FALSE | TRUE | FALSE | 53.97 |
| P02751 | 1037 | GQPBQYNVGPSV | FALSE | TRUE | FALSE | 17.16 |
| P02751 | 1038 | QPBQYNVGPSVS | FALSE | TRUE | FALSE | 11.95 |
| P02751 | 1050 | KYPLBNLQPASE | FALSE | TRUE | FALSE | 15.91 |
| P02751 | 1205 | GYBITTTPTNGQ | FALSE | TRUE | FALSE | 10.38 |
| P02751 | 1206 | YBITTTPTNGQQ | FALSE | TRUE | FALSE | 10.3  |
| P02751 | 1273 | LBFTNIGPDTMB | FALSE | TRUE | FALSE | 10.11 |
| P02751 | 1282 | TMBVTWAPPPSI | FALSE | TRUE | FALSE | 15.6  |
| P02751 | 1283 | MBVTWAPPPSID | FALSE | TRUE | FALSE | 11.02 |
| P02751 | 1298 | FLVBYSPOKNEE | FALSE | TRUE | FALSE | 14.63 |
| P02751 | 1299 | LVBYSPOKNEED | FALSE | TRUE | FALSE | 13.81 |
| P02751 | 1300 | VBYSPOKNEEDV | FALSE | TRUE | FALSE | 10.89 |
| P02751 | 1342 | YEQHESTPLBGB | FALSE | TRUE | FALSE | 14.88 |
| P02751 | 1343 | EQHESTPLBGBQ | FALSE | TRUE | FALSE | 21.22 |
| P02751 | 1344 | QHESTPLBGBQK | FALSE | TRUE | FALSE | 39.37 |
| P02751 | 1345 | HESTPLBGBQKT | FALSE | TRUE | FALSE | 51.37 |
| P02751 | 1346 | ESTPLBGBQKTG | FALSE | TRUE | FALSE | 45.14 |
| P02751 | 1347 | STPLBGBQKTGL | FALSE | TRUE | FALSE | 30.79 |
| P02751 | 1348 | TPLBGBQKTGLD | FALSE | TRUE | FALSE | 75.29 |
| P02751 | 1349 | PLBGBQKTGLDS | FALSE | TRUE | FALSE | 54.86 |
| P02751 | 1350 | LBGBQKTGLDSP | FALSE | TRUE | FALSE | 65.47 |
| P02751 | 1351 | BGBQKTGLDSPT | FALSE | TRUE | FALSE | 43.58 |
| P02751 | 1375 | TVHWIAPBATIT | FALSE | TRUE | FALSE | 12.11 |
| P02751 | 1377 | HWIAPBATITGY | FALSE | TRUE | FALSE | 12.67 |
| P02751 | 1378 | WIAPBATITGYB | FALSE | TRUE | FALSE | 20.7  |

|        |      |              |       |      |       |       |
|--------|------|--------------|-------|------|-------|-------|
| P02751 | 1379 | IAPBATITGYBI | FALSE | TRUE | FALSE | 11.87 |
| P02751 | 1380 | APBATITGYBIB | FALSE | TRUE | FALSE | 16    |
| P02751 | 1384 | TITGYBIBHHPE | FALSE | TRUE | FALSE | 19.84 |
| P02751 | 1385 | ITGYBIBHHPEH | FALSE | TRUE | FALSE | 15.57 |
| P02751 | 1386 | TGYBIBHHPEHF | FALSE | TRUE | FALSE | 13.54 |
| P02751 | 1387 | GYBIBHHPEHFS | FALSE | TRUE | FALSE | 14.27 |
| P02751 | 1388 | YBIBHHPEHFSG | FALSE | TRUE | FALSE | 16.96 |
| P02751 | 1389 | BIBHHPEHFSGB | FALSE | TRUE | FALSE | 26.93 |
| P02751 | 1390 | IBHHPEHFSGBP | FALSE | TRUE | FALSE | 10.52 |
| P02751 | 1391 | BHHPEHFSGBPB | FALSE | TRUE | FALSE | 13.35 |
| P02751 | 1392 | HHPEHFSGBPBE | FALSE | TRUE | FALSE | 11.05 |
| P02751 | 1397 | FSGBPBEDBVPH | FALSE | TRUE | FALSE | 11.26 |
| P02751 | 1399 | GBPBEDBVPHSB | FALSE | TRUE | FALSE | 13.62 |
| P02751 | 1400 | BPBEDBVPHSBN | FALSE | TRUE | FALSE | 16.09 |
| P02751 | 1402 | BEDBVPHSBNSI | FALSE | TRUE | FALSE | 19.22 |
| P02751 | 1403 | EDBVPHSBNSIT | FALSE | TRUE | FALSE | 13.88 |
| P02751 | 1404 | DBVPHSBNSITL | FALSE | TRUE | FALSE | 15.43 |
| P02751 | 1405 | BVPHSBNSITLT | FALSE | TRUE | FALSE | 16.32 |
| P02751 | 1406 | VPHSBNSITLTN | FALSE | TRUE | FALSE | 13    |
| P02751 | 1431 | LNGBEESPLLIG | FALSE | TRUE | FALSE | 10.23 |
| P02751 | 1433 | GBEESPLLIGQQ | FALSE | TRUE | FALSE | 14.1  |
| P02751 | 1475 | VBYYBITYGETG | FALSE | TRUE | FALSE | 11.37 |
| P02751 | 1477 | YYBITYGETGGN | FALSE | TRUE | FALSE | 10.35 |
| P02751 | 1515 | TITVYAVTGBGD | FALSE | TRUE | FALSE | 14.03 |
| P02751 | 1516 | ITVYAVTGBGDS | FALSE | TRUE | FALSE | 23.26 |
| P02751 | 1517 | TVYAVTGBGDSP | FALSE | TRUE | FALSE | 25.64 |
| P02751 | 1518 | VYAVTGBGDSPA | FALSE | TRUE | FALSE | 23.47 |
| P02751 | 1519 | YAVTGBGDSPAS | FALSE | TRUE | FALSE | 24.55 |
| P02751 | 1520 | AVTGBGDSPASS | FALSE | TRUE | FALSE | 27.32 |
| P02751 | 1521 | VTGBGDSPASSK | FALSE | TRUE | FALSE | 46.5  |
| P02751 | 1522 | TGBGDSPASSKP | FALSE | TRUE | FALSE | 30.37 |
| P02751 | 1523 | GBGDSPASSKPI | FALSE | TRUE | FALSE | 23.02 |
| P02751 | 1536 | INYBTEIDKPSQ | FALSE | TRUE | FALSE | 12.47 |
| P02751 | 1652 | WESPQGQVSBYB | FALSE | TRUE | FALSE | 16.88 |
| P02751 | 1659 | VSBYBVTYSSPE | FALSE | TRUE | FALSE | 10.38 |
| P02751 | 1660 | SBYBVTYSSPED | FALSE | TRUE | FALSE | 12.28 |
| P02751 | 1661 | BYBVTYSSPEDG | FALSE | TRUE | FALSE | 11.68 |
| P02751 | 1749 | LTGYBVBVTPKE | FALSE | TRUE | FALSE | 29.37 |
| P02751 | 1752 | YBVBVTPKEKTG | FALSE | TRUE | FALSE | 14.11 |
| P02751 | 1791 | SVYALKDTLTSB | FALSE | TRUE | FALSE | 12.1  |
| P02751 | 1812 | ENVSPBBABVT  | FALSE | TRUE | FALSE | 16.8  |
| P02751 | 1813 | NVSPBBABVTD  | FALSE | TRUE | FALSE | 17.08 |
| P02751 | 1814 | VSPBBABVTDAT | FALSE | TRUE | FALSE | 17.45 |
| P02751 | 1815 | SPPBBABVTDAT | FALSE | TRUE | FALSE | 19.01 |
| P02751 | 1816 | PPBBABVTDAT  | FALSE | TRUE | FALSE | 24.07 |
| P02751 | 1817 | PBBABVTDATET | FALSE | TRUE | FALSE | 17.61 |
| P02751 | 1818 | BBABVTDATETT | FALSE | TRUE | FALSE | 20.27 |
| P02751 | 1819 | BABVTDATETTI | FALSE | TRUE | FALSE | 12.05 |
| P02751 | 1857 | IQBTIKPDVBSY | FALSE | TRUE | FALSE | 13.01 |
| P02751 | 1858 | QBTIKPDVBSYT | FALSE | TRUE | FALSE | 12.63 |
| P02751 | 1920 | LVSQPPBABIT  | FALSE | TRUE | FALSE | 19.47 |
| P02751 | 1921 | VVSQPPBABITG | FALSE | TRUE | FALSE | 23.51 |

|        |      |               |       |      |       |       |
|--------|------|---------------|-------|------|-------|-------|
| P02751 | 1922 | SWQPPBABITGY  | FALSE | TRUE | FALSE | 26.46 |
| P02751 | 1923 | WQPPBABITGYI  | FALSE | TRUE | FALSE | 18.43 |
| P02751 | 1985 | LIGBKTDELQPQ  | FALSE | TRUE | FALSE | 10.62 |
| P02751 | 2048 | QQMIFEEHGFBB  | FALSE | TRUE | FALSE | 14.04 |
| P02751 | 2049 | QMIFEEHGFBBT  | FALSE | TRUE | FALSE | 16.14 |
| P02751 | 2050 | MIFEEHGFBBTT  | FALSE | TRUE | FALSE | 20.08 |
| P02751 | 2051 | IFEEHGFBBTTP  | FALSE | TRUE | FALSE | 21.51 |
| P02751 | 2052 | FEEHGFBBTTPP  | FALSE | TRUE | FALSE | 29.16 |
| P02751 | 2053 | EEHGFBBTTPPT  | FALSE | TRUE | FALSE | 14.37 |
| P02751 | 2054 | EHGFBBTTPPTT  | FALSE | TRUE | FALSE | 33.04 |
| P02751 | 2055 | HGFBBTTPPTTA  | FALSE | TRUE | FALSE | 33.33 |
| P02751 | 2056 | GFBBTTPPTTAT  | FALSE | TRUE | FALSE | 24.56 |
| P02751 | 2057 | FBBTTPPTTATP  | FALSE | TRUE | FALSE | 25.93 |
| P02751 | 2058 | BBTTPPTTATPI  | FALSE | TRUE | FALSE | 13.4  |
| P02751 | 2061 | TPPTTATPIBHB  | FALSE | TRUE | FALSE | 10.74 |
| P02751 | 2067 | TPIBHPBPYPYP  | FALSE | TRUE | FALSE | 11.93 |
| P02751 | 2069 | IBHBPBPYPYPNV | FALSE | TRUE | FALSE | 19.03 |
| P02751 | 2154 | STSATLTGLTBG  | FALSE | TRUE | FALSE | 20.51 |
| P02751 | 2155 | TSATLTGLTBGA  | FALSE | TRUE | FALSE | 24.08 |
| P02751 | 2156 | SATLTGLTBGAT  | FALSE | TRUE | FALSE | 21.58 |
| P02751 | 2157 | ATLTGLTBGATY  | FALSE | TRUE | FALSE | 30.58 |
| P02751 | 2158 | TLTGLTBGATYN  | FALSE | TRUE | FALSE | 26.85 |
| P02751 | 2159 | LTGLTBGATYNV  | FALSE | TRUE | FALSE | 32.92 |
| P02751 | 2160 | TGLTBGATYNVI  | FALSE | TRUE | FALSE | 28.48 |
| P02751 | 2161 | GLTBGATYNVIV  | FALSE | TRUE | FALSE | 13.32 |
| P02751 | 2162 | LTBGATYNVIVE  | FALSE | TRUE | FALSE | 13.84 |
| P02751 | 2163 | TBGATYNVIVEA  | FALSE | TRUE | FALSE | 12.16 |
| P02751 | 2173 | EALKDQQQBHKVB | FALSE | TRUE | FALSE | 14.3  |
| P02751 | 2175 | LKDQQQBHKVBEE | FALSE | TRUE | FALSE | 16.7  |
| P02751 | 2176 | KDQQQBHKVBEEV | FALSE | TRUE | FALSE | 30.22 |
| P02751 | 2177 | DQQQBHKVBEEVV | FALSE | TRUE | FALSE | 29.39 |
| P02751 | 2178 | QQQBHKVBEEVVT | FALSE | TRUE | FALSE | 38.72 |
| P02751 | 2179 | QBHKVBEEVVTV  | FALSE | TRUE | FALSE | 34.71 |
| P02751 | 2180 | BHKVBEEVVTVG  | FALSE | TRUE | FALSE | 21.3  |
| P02751 | 2181 | HKVBEEVVTVGN  | FALSE | TRUE | FALSE | 10.8  |
| P02751 | 2238 | FGSGHFBCDSSB  | FALSE | TRUE | FALSE | 17.65 |
| P02751 | 2256 | VNYKIGEKWDBQ  | FALSE | TRUE | FALSE | 13.69 |
| P02751 | 2258 | YKIGEKWDBQGE  | FALSE | TRUE | FALSE | 12.29 |
| P02751 | 2263 | KWDBQGENGQMM  | FALSE | TRUE | FALSE | 12.05 |
| P02751 | 2264 | WDBQGENGQMMK  | FALSE | TRUE | FALSE | 10.36 |
| P02751 | 2315 | AICSCTCFGGQB  | FALSE | TRUE | FALSE | 10.73 |
| P02751 | 2316 | ICSCTCFGGQBG  | FALSE | TRUE | FALSE | 14.12 |
| P02751 | 2318 | SCTCFGGQBGBWB | FALSE | TRUE | FALSE | 12.56 |
| P02751 | 2320 | TCFGGQBGBWBCD | FALSE | TRUE | FALSE | 11.32 |
| P02751 | 2321 | CFGGQBGBWBCDN | FALSE | TRUE | FALSE | 12.04 |
| P02751 | 2322 | FGGQBGBWBCDNC | FALSE | TRUE | FALSE | 12.17 |
| P02751 | 2323 | GGQBGBWBCDNCB | FALSE | TRUE | FALSE | 15.64 |
| P02751 | 2324 | GQBGBWBCDNCBB | FALSE | TRUE | FALSE | 19.88 |
| P02751 | 2325 | QBGWBCDNCBBP  | FALSE | TRUE | FALSE | 17.3  |
| P02751 | 2326 | BGWBCDNCBBPG  | FALSE | TRUE | FALSE | 12.48 |
| P02751 | 2345 | TTGQSYNQYSQB  | FALSE | TRUE | FALSE | 41.39 |
| P02751 | 2346 | TGQSYNQYSQBY  | FALSE | TRUE | FALSE | 22.44 |

|        |      |              |       |      |       |       |
|--------|------|--------------|-------|------|-------|-------|
| P02751 | 2349 | SYNQYSQBYHQB | FALSE | TRUE | FALSE | 28.87 |
| P02751 | 2350 | YNQYSQBYHQBT | FALSE | TRUE | FALSE | 24.45 |
| P02751 | 2351 | NQYSQBYHQBTN | FALSE | TRUE | FALSE | 23.47 |
| P02751 | 2352 | QYSQBYHQBTNT | FALSE | TRUE | FALSE | 26.03 |
| P02751 | 2353 | YSQBYHQBTNTN | FALSE | TRUE | FALSE | 15.87 |
| P02751 | 2354 | SQBYHQBTNTNV | FALSE | TRUE | FALSE | 20.27 |
| P02751 | 2355 | QBYHQBTNTNVN | FALSE | TRUE | FALSE | 14.38 |
| P20930 | 35   | ELLEKEFBQILK | FALSE | TRUE | FALSE | 12.67 |
| P20930 | 36   | LLEKEFBQILKN | FALSE | TRUE | FALSE | 16.32 |
| P20930 | 37   | LEKEFBQILKNP | FALSE | TRUE | FALSE | 22.36 |
| P20930 | 38   | EKEFBQILKNPD | FALSE | TRUE | FALSE | 27.85 |
| P20930 | 39   | KEFBQILKNPDD | FALSE | TRUE | FALSE | 24.49 |
| P20930 | 40   | EFBQILKNPDDP | FALSE | TRUE | FALSE | 19.95 |
| P20930 | 41   | FBQILKNPDDPD | FALSE | TRUE | FALSE | 35.86 |
| P20930 | 79   | FKLAQAYYESTB | FALSE | TRUE | FALSE | 15.44 |
| P20930 | 83   | QAYYESTBKENL | FALSE | TRUE | FALSE | 16.5  |
| P20930 | 84   | AYYESTBKENLP | FALSE | TRUE | FALSE | 12.2  |
| P20930 | 85   | YYESTBKENLPI | FALSE | TRUE | FALSE | 17.04 |
| P20930 | 86   | YESTBKENLPIS | FALSE | TRUE | FALSE | 10.76 |
| P20930 | 120  | ENBKBPSSLEBB | FALSE | TRUE | FALSE | 20.47 |
| P20930 | 121  | NBKBPSSLEBBN | FALSE | TRUE | FALSE | 22.6  |
| P20930 | 122  | BKBPSSLEBBNN | FALSE | TRUE | FALSE | 17.9  |
| P20930 | 123  | KBPSSLEBBNNB | FALSE | TRUE | FALSE | 19.47 |
| P20930 | 124  | BPSSLEBBNNBK | FALSE | TRUE | FALSE | 29.24 |
| P20930 | 125  | PSSLEBBNNBKG | FALSE | TRUE | FALSE | 15.15 |
| P20930 | 126  | SSLEBBNNBKGN | FALSE | TRUE | FALSE | 33.48 |
| P20930 | 129  | EBBNNBKGNKGB | FALSE | TRUE | FALSE | 10.01 |
| P20930 | 142  | KSPBETGGKBHE | FALSE | TRUE | FALSE | 15.75 |
| P20930 | 143  | SPBETGGKBHES | FALSE | TRUE | FALSE | 59.62 |
| P20930 | 144  | PBETGGKBHESS | FALSE | TRUE | FALSE | 40.32 |
| P20930 | 145  | BETGGKBHESSS | FALSE | TRUE | FALSE | 43.25 |
| P20930 | 146  | ETGGKBHESSSE | FALSE | TRUE | FALSE | 13.46 |
| P20930 | 147  | TGGKBHESSSEK | FALSE | TRUE | FALSE | 22.74 |
| P20930 | 149  | GKBHESSSEKKE | FALSE | TRUE | FALSE | 11.81 |
| P20930 | 150  | KBHESSSEKKEB | FALSE | TRUE | FALSE | 15.16 |
| P20930 | 159  | KEBKGYSPTHBE | FALSE | TRUE | FALSE | 31.35 |
| P20930 | 160  | EBKGYSPTHBEE | FALSE | TRUE | FALSE | 21.78 |
| P20930 | 161  | BKGYSPTHBEEE | FALSE | TRUE | FALSE | 22.23 |
| P20930 | 164  | YSPTHBEEYGK  | FALSE | TRUE | FALSE | 11.1  |
| P20930 | 188  | TENTBLGDNBKB | FALSE | TRUE | FALSE | 21.05 |
| P20930 | 189  | ENTBLGDNBKBL | FALSE | TRUE | FALSE | 22.53 |
| P20930 | 190  | NTBLGDNBKBLS | FALSE | TRUE | FALSE | 23.85 |
| P20930 | 191  | TBLGDNBKBLSE | FALSE | TRUE | FALSE | 27.67 |
| P20930 | 192  | BLGDNBKBLSEB | FALSE | TRUE | FALSE | 21.23 |
| P20930 | 193  | LGDNBKBLSEBL | FALSE | TRUE | FALSE | 11.94 |
| P20930 | 194  | GDNBKBLSEBLE | FALSE | TRUE | FALSE | 11.97 |
| P20930 | 195  | DNBKBLSEBLEE | FALSE | TRUE | FALSE | 10.75 |
| P20930 | 196  | NBKBLSEBLEEK | FALSE | TRUE | FALSE | 16.09 |
| P20930 | 197  | BKBLSEBLEEKE | FALSE | TRUE | FALSE | 12.36 |
| P20930 | 214  | VYDYENTGBMTQ | FALSE | TRUE | FALSE | 10.31 |
| P20930 | 215  | YDYENTGBMTQK | FALSE | TRUE | FALSE | 34.2  |
| P20930 | 216  | DYENTGBMTQKW | FALSE | TRUE | FALSE | 30.2  |

|        |     |               |       |      |       |       |
|--------|-----|---------------|-------|------|-------|-------|
| P20930 | 217 | YENTGBMTQKWI  | FALSE | TRUE | FALSE | 30.69 |
| P20930 | 218 | ENTGBMTQKWIQ  | FALSE | TRUE | FALSE | 36.16 |
| P20930 | 219 | NTGBMTQKWIQS  | FALSE | TRUE | FALSE | 19.78 |
| P20930 | 220 | TGBMTQKWIQSG  | FALSE | TRUE | FALSE | 23.4  |
| P20930 | 221 | GBMTQKWIQSGH  | FALSE | TRUE | FALSE | 15.45 |
| P20930 | 250 | LLEENKIYEBSSB | FALSE | TRUE | FALSE | 12.42 |
| P20930 | 251 | LEENKIYEBSSBS | FALSE | TRUE | FALSE | 14.72 |
| P20930 | 252 | EENKIYEBSSBSS | FALSE | TRUE | FALSE | 16.04 |
| P20930 | 253 | ENKIYEBSSBSSD | FALSE | TRUE | FALSE | 18.1  |
| P20930 | 254 | NKIYEBSSBSSDG | FALSE | TRUE | FALSE | 19.33 |
| P20930 | 255 | KIYEBSSBSSDGK | FALSE | TRUE | FALSE | 32.09 |
| P20930 | 256 | IYEBSSBSSDGKS | FALSE | TRUE | FALSE | 24.07 |
| P20930 | 257 | YEBSSBSSDGKSS | FALSE | TRUE | FALSE | 20.23 |
| P20930 | 258 | EBSBSSDGKSSS  | FALSE | TRUE | FALSE | 13.7  |
| P20930 | 259 | BSBSSDGKSSSQ  | FALSE | TRUE | FALSE | 16.25 |
| P20930 | 267 | SSSQVNBSBHEN  | FALSE | TRUE | FALSE | 10.37 |
| P20930 | 268 | SSQVNBSBHENT  | FALSE | TRUE | FALSE | 15.02 |
| P20930 | 269 | SQVNBSBHENTS  | FALSE | TRUE | FALSE | 18.85 |
| P20930 | 270 | QVNBSBHENTSQ  | FALSE | TRUE | FALSE | 22.66 |
| P20930 | 271 | VNBSBHENTSQV  | FALSE | TRUE | FALSE | 19.4  |
| P20930 | 273 | BSBHENTSQVPL  | FALSE | TRUE | FALSE | 13.7  |
| P20930 | 274 | SBHENTSQVPLQ  | FALSE | TRUE | FALSE | 10.97 |
| P20930 | 275 | BHENTSQVPLQE  | FALSE | TRUE | FALSE | 10.33 |
| P20930 | 280 | SQVPLQESBTBK  | FALSE | TRUE | FALSE | 19.75 |
| P20930 | 281 | QVPLQESBTBKB  | FALSE | TRUE | FALSE | 51.97 |
| P20930 | 282 | VPLQESBTBKBB  | FALSE | TRUE | FALSE | 28.41 |
| P20930 | 283 | PLQESBTBKBBG  | FALSE | TRUE | FALSE | 30.35 |
| P20930 | 284 | LQESBTBKBBGS  | FALSE | TRUE | FALSE | 61.14 |
| P20930 | 285 | QESBTBKBBGSB  | FALSE | TRUE | FALSE | 36.28 |
| P20930 | 286 | ESBTBKBBGSBV  | FALSE | TRUE | FALSE | 42.36 |
| P20930 | 287 | SBTBKBBGSBVS  | FALSE | TRUE | FALSE | 42.45 |
| P20930 | 288 | BTBKBBGSBVSQ  | FALSE | TRUE | FALSE | 47.65 |
| P20930 | 289 | TBKBBGSBVSQD  | FALSE | TRUE | FALSE | 76.66 |
| P20930 | 290 | BKBBGSBVSQDB  | FALSE | TRUE | FALSE | 48.59 |
| P20930 | 291 | KBBGSBVSQDBD  | FALSE | TRUE | FALSE | 55.18 |
| P20930 | 292 | BBGSBVSQDBDS  | FALSE | TRUE | FALSE | 53.16 |
| P20930 | 293 | BGSBVSQDBDSE  | FALSE | TRUE | FALSE | 35.49 |
| P20930 | 294 | GSBVSQDBDSEG  | FALSE | TRUE | FALSE | 10.28 |
| P20930 | 308 | EDSEBHSGSASB  | FALSE | TRUE | FALSE | 11.56 |
| P20930 | 309 | DSEBHSGSASBN  | FALSE | TRUE | FALSE | 19.21 |
| P20930 | 310 | SEBHSGSASBNH  | FALSE | TRUE | FALSE | 16.07 |
| P20930 | 316 | SASBNHHGSAWE  | FALSE | TRUE | FALSE | 10.36 |
| P20930 | 319 | BNHHGSAWEQSB  | FALSE | TRUE | FALSE | 13.17 |
| P20930 | 323 | GSAWEQSBDGSB  | FALSE | TRUE | FALSE | 13.34 |
| P20930 | 324 | SAWEQSBDGSBH  | FALSE | TRUE | FALSE | 19.55 |
| P20930 | 325 | AWEQSBDGSBHP  | FALSE | TRUE | FALSE | 18.5  |
| P20930 | 326 | WEQSBDGSBHPB  | FALSE | TRUE | FALSE | 26.51 |
| P20930 | 327 | EQSBDGSBHPBS  | FALSE | TRUE | FALSE | 25.61 |
| P20930 | 328 | QSBDGSBHPBSH  | FALSE | TRUE | FALSE | 38.61 |
| P20930 | 329 | SBDGSBHPBSHD  | FALSE | TRUE | FALSE | 33.01 |
| P20930 | 330 | BDGSBHPBSHDE  | FALSE | TRUE | FALSE | 26.61 |
| P20930 | 331 | DGSBHPBSHDED  | FALSE | TRUE | FALSE | 15.36 |



|        |     |              |       |      |       |       |
|--------|-----|--------------|-------|------|-------|-------|
| P20930 | 332 | GSBHPBSHDEDB | FALSE | TRUE | FALSE | 11.54 |
| P20930 | 333 | SBHPBSHDEDBA | FALSE | TRUE | FALSE | 10.03 |
| P20930 | 343 | BASHGHSADSSB | FALSE | TRUE | FALSE | 12.37 |
| P20930 | 346 | HGHSADSSBQSG | FALSE | TRUE | FALSE | 10.43 |
| P20930 | 347 | GHSADSSBQSGT | FALSE | TRUE | FALSE | 10.21 |
| P20930 | 348 | HSADSSBQSGTB | FALSE | TRUE | FALSE | 21.28 |
| P20930 | 349 | SADSSBQSGTBH | FALSE | TRUE | FALSE | 24.83 |
| P20930 | 350 | ADSSBQSGTBHA | FALSE | TRUE | FALSE | 35.14 |
| P20930 | 351 | DSSBQSGTBHAE | FALSE | TRUE | FALSE | 34.41 |
| P20930 | 352 | SSBQSGTBHAET | FALSE | TRUE | FALSE | 57.08 |
| P20930 | 353 | SBQSGTBHAETS | FALSE | TRUE | FALSE | 50.04 |
| P20930 | 354 | BQSGTBHAETSS | FALSE | TRUE | FALSE | 38.31 |
| P20930 | 355 | QSGTBHAETSSB | FALSE | TRUE | FALSE | 30.35 |
| P20930 | 356 | SGTBHAETSSBG | FALSE | TRUE | FALSE | 42.13 |
| P20930 | 357 | GTBHAETSSBGQ | FALSE | TRUE | FALSE | 45.4  |
| P20930 | 358 | TBHAETSSBGQT | FALSE | TRUE | FALSE | 43.46 |
| P20930 | 359 | BHAETSSBGQTA | FALSE | TRUE | FALSE | 25.9  |
| P20930 | 360 | HAETSSBGQTAS | FALSE | TRUE | FALSE | 20.13 |
| P20930 | 361 | AETSSBGQTASS | FALSE | TRUE | FALSE | 23.78 |
| P20930 | 362 | ETSSBGQTASSH | FALSE | TRUE | FALSE | 26.69 |
| P20930 | 363 | TSSBGQTASSHE | FALSE | TRUE | FALSE | 31.15 |
| P20930 | 364 | SSBGQTASSHEQ | FALSE | TRUE | FALSE | 36.06 |
| P20930 | 366 | BGQTASSHEQAB | FALSE | TRUE | FALSE | 20.72 |
| P20930 | 373 | HEQABSSPGEBH | FALSE | TRUE | FALSE | 11.12 |
| P20930 | 374 | EQABSSPGEBHG | FALSE | TRUE | FALSE | 11.26 |
| P20930 | 375 | QABSSPGEBHGS | FALSE | TRUE | FALSE | 24.28 |
| P20930 | 376 | ABSSPGEBHGSG | FALSE | TRUE | FALSE | 25.43 |
| P20930 | 377 | BSSPGEBHGSGH | FALSE | TRUE | FALSE | 17.05 |
| P20930 | 378 | SSPGEBHGSGHQ | FALSE | TRUE | FALSE | 12.05 |
| P20930 | 379 | SPGEBHGSGHQQ | FALSE | TRUE | FALSE | 14.75 |
| P20930 | 381 | GEBHGSGHQQSA | FALSE | TRUE | FALSE | 15.35 |
| P20930 | 383 | BHGSGHQQSADS | FALSE | TRUE | FALSE | 10.14 |
| P20930 | 388 | HQQSADSSBHSA | FALSE | TRUE | FALSE | 10.78 |
| P20930 | 390 | QSADSSBHSATG | FALSE | TRUE | FALSE | 11.79 |
| P20930 | 391 | SADSSBHSATGB | FALSE | TRUE | FALSE | 25.52 |
| P20930 | 392 | ADSSBHSATGBG | FALSE | TRUE | FALSE | 23.17 |
| P20930 | 393 | DSSBHSATGBGQ | FALSE | TRUE | FALSE | 34.41 |
| P20930 | 394 | SSBHSATGBGQA | FALSE | TRUE | FALSE | 14.86 |
| P20930 | 395 | SBHSATGBGQAS | FALSE | TRUE | FALSE | 25.35 |
| P20930 | 396 | BHSATGBGQASS | FALSE | TRUE | FALSE | 31.04 |
| P20930 | 397 | HSATGBGQASSA | FALSE | TRUE | FALSE | 24.39 |
| P20930 | 398 | SATGBGQASSAV | FALSE | TRUE | FALSE | 22    |
| P20930 | 399 | ATGBGQASSAVS | FALSE | TRUE | FALSE | 27.23 |
| P20930 | 400 | TGBGQASSAVSD | FALSE | TRUE | FALSE | 26.42 |
| P20930 | 401 | GBGQASSAVSDB | FALSE | TRUE | FALSE | 32.48 |
| P20930 | 402 | BGQASSAVSDBG | FALSE | TRUE | FALSE | 16.34 |
| P20930 | 404 | QASSAVSDBGHB | FALSE | TRUE | FALSE | 12.02 |
| P20930 | 405 | ASSAVSDBGHBG | FALSE | TRUE | FALSE | 15.8  |
| P20930 | 406 | SSAVSDBGHBGS | FALSE | TRUE | FALSE | 26.3  |
| P20930 | 407 | SAVSDBGHBGSS | FALSE | TRUE | FALSE | 32.74 |
| P20930 | 408 | AVSDBGHBGSSG | FALSE | TRUE | FALSE | 28.56 |
| P20930 | 409 | VSDBGHBGSSGS | FALSE | TRUE | FALSE | 27.66 |

|        |     |              |       |      |       |       |
|--------|-----|--------------|-------|------|-------|-------|
| P20930 | 410 | SDBGHBGSSGSQ | FALSE | TRUE | FALSE | 24.18 |
| P20930 | 412 | BGHBGSSGSQAS | FALSE | TRUE | FALSE | 17.5  |
| P20930 | 413 | GHBGSSGSQASD | FALSE | TRUE | FALSE | 12.85 |
| P20930 | 414 | HBGSSGSQASDS | FALSE | TRUE | FALSE | 14.88 |
| P20930 | 443 | AGLBQQSHQEST | FALSE | TRUE | FALSE | 16.32 |
| P20930 | 444 | GLBQQSHQESTB | FALSE | TRUE | FALSE | 33.61 |
| P20930 | 445 | LBQQSHQESTBG | FALSE | TRUE | FALSE | 42.42 |
| P20930 | 446 | BQQSHQESTBGB | FALSE | TRUE | FALSE | 24.15 |
| P20930 | 447 | QQSHQESTBGBS | FALSE | TRUE | FALSE | 24.3  |
| P20930 | 448 | QSHQESTBGBSG | FALSE | TRUE | FALSE | 20.14 |
| P20930 | 449 | SHQESTBGBSGE | FALSE | TRUE | FALSE | 18.26 |
| P20930 | 450 | HQESTBGBSGEB | FALSE | TRUE | FALSE | 23.98 |
| P20930 | 451 | QESTBGBSGEBS | FALSE | TRUE | FALSE | 30.51 |
| P20930 | 452 | ESTBGBSGEBSG | FALSE | TRUE | FALSE | 38.73 |
| P20930 | 453 | STBGBSGEBSGB | FALSE | TRUE | FALSE | 30.76 |
| P20930 | 454 | TBGBSGEBSGBS | FALSE | TRUE | FALSE | 41.35 |
| P20930 | 455 | BGBSGEBSGBSG | FALSE | TRUE | FALSE | 30.14 |
| P20930 | 456 | GBSGEBSGBSGS | FALSE | TRUE | FALSE | 25.39 |
| P20930 | 457 | BSGEBSGBSGSS | FALSE | TRUE | FALSE | 22.28 |
| P20930 | 458 | SGEBSGBSGSSL | FALSE | TRUE | FALSE | 25.75 |
| P20930 | 459 | GEBSGBSGSSLY | FALSE | TRUE | FALSE | 22.17 |
| P20930 | 460 | EBSGBSGSSLYQ | FALSE | TRUE | FALSE | 19.75 |
| P20930 | 461 | BSGBSGSSLYQV | FALSE | TRUE | FALSE | 17.18 |
| P20930 | 462 | SGBSGSSLYQVS | FALSE | TRUE | FALSE | 10.36 |
| P20930 | 478 | PDSAHGBTGTST | FALSE | TRUE | FALSE | 12.56 |
| P20930 | 479 | DSAHGBTGTSTG | FALSE | TRUE | FALSE | 11.75 |
| P20930 | 480 | SAHGBTGTSTGG | FALSE | TRUE | FALSE | 12.89 |
| P20930 | 481 | AHGBTGTSTGGB | FALSE | TRUE | FALSE | 20.66 |
| P20930 | 482 | HGBTGTSTGGBQ | FALSE | TRUE | FALSE | 29.97 |
| P20930 | 483 | GBTGTSTGGBQG | FALSE | TRUE | FALSE | 20.45 |
| P20930 | 484 | BTGTSTGGBQGS | FALSE | TRUE | FALSE | 31.28 |
| P20930 | 485 | TGTSTGGBQGSH | FALSE | TRUE | FALSE | 15.17 |
| P20930 | 486 | GTSTGGBQGSHH | FALSE | TRUE | FALSE | 17.72 |
| P20930 | 487 | TSTGGBQGSHHE | FALSE | TRUE | FALSE | 25.02 |
| P20930 | 488 | STGGBQGSHHEQ | FALSE | TRUE | FALSE | 29.77 |
| P20930 | 490 | GGBQGSHHEQAB | FALSE | TRUE | FALSE | 41    |
| P20930 | 491 | GBQGSHHEQABD | FALSE | TRUE | FALSE | 35.42 |
| P20930 | 492 | BQGSHHEQABDS | FALSE | TRUE | FALSE | 24.52 |
| P20930 | 496 | HHEQABDSSBHS | FALSE | TRUE | FALSE | 13.46 |
| P20930 | 497 | HEQABDSSBHSA | FALSE | TRUE | FALSE | 14.45 |
| P20930 | 498 | EQABDSSBHSAS | FALSE | TRUE | FALSE | 10.7  |
| P20930 | 499 | QABDSSBHSASQ | FALSE | TRUE | FALSE | 23.23 |
| P20930 | 500 | ABDSSBHSASQE | FALSE | TRUE | FALSE | 24.13 |
| P20930 | 501 | BDSSBHSASQEG | FALSE | TRUE | FALSE | 21.7  |
| P20930 | 502 | DSSBHSASQEGQ | FALSE | TRUE | FALSE | 12.34 |
| P20930 | 503 | SSBHSASQEGQD | FALSE | TRUE | FALSE | 13.93 |
| P20930 | 504 | SBHSASQEGQDT | FALSE | TRUE | FALSE | 12.61 |
| P20930 | 511 | EGQDTIBGHPGS | FALSE | TRUE | FALSE | 13.01 |
| P20930 | 512 | GQDTIBGHPGSS | FALSE | TRUE | FALSE | 18.34 |
| P20930 | 513 | QDTIBGHPGSSB | FALSE | TRUE | FALSE | 26.41 |
| P20930 | 514 | DTIBGHPGSSBG | FALSE | TRUE | FALSE | 35.92 |
| P20930 | 515 | TIBGHPGSSBGG | FALSE | TRUE | FALSE | 20.7  |

|        |     |               |       |      |       |       |
|--------|-----|---------------|-------|------|-------|-------|
| P20930 | 516 | IBGHPGSSBGGGB | FALSE | TRUE | FALSE | 23    |
| P20930 | 517 | BGHPGSSBGGGBQ | FALSE | TRUE | FALSE | 60.88 |
| P20930 | 518 | GHPGSSBGGGBQC | FALSE | TRUE | FALSE | 44.25 |
| P20930 | 519 | HPGSSBGGGBQGS | FALSE | TRUE | FALSE | 67.16 |
| P20930 | 520 | PGSSBGGGBQGSH | FALSE | TRUE | FALSE | 35.37 |
| P20930 | 521 | GSSBGGGBQGSHH | FALSE | TRUE | FALSE | 43.6  |
| P20930 | 522 | SSBGGGBQGSHHE | FALSE | TRUE | FALSE | 65.29 |
| P20930 | 523 | SBGGGBQGSHHEQ | FALSE | TRUE | FALSE | 60.69 |
| P20930 | 524 | BGGBQGSHHEQS  | FALSE | TRUE | FALSE | 56.91 |
| P20930 | 525 | GGBQGSHHEQSV  | FALSE | TRUE | FALSE | 49.6  |
| P20930 | 526 | GBQGSHHEQSVN  | FALSE | TRUE | FALSE | 36.94 |
| P20930 | 527 | BQGSHHEQSVNB  | FALSE | TRUE | FALSE | 14.52 |
| P20930 | 531 | HHEQSVNBSGHS  | FALSE | TRUE | FALSE | 11.67 |
| P20930 | 532 | HEQSVNBSGHSG  | FALSE | TRUE | FALSE | 12.45 |
| P20930 | 533 | EQSVNBSGHSGS  | FALSE | TRUE | FALSE | 12.72 |
| P20930 | 534 | QSVNBSGHSGSH  | FALSE | TRUE | FALSE | 11.15 |
| P20930 | 536 | VNBSGHSGSHHS  | FALSE | TRUE | FALSE | 11.04 |
| P20930 | 551 | SQGBSDASHGQS  | FALSE | TRUE | FALSE | 10.89 |
| P20930 | 552 | QGBSDASHGQSG  | FALSE | TRUE | FALSE | 13.73 |
| P20930 | 553 | GBSDASHGQSGS  | FALSE | TRUE | FALSE | 12.39 |
| P20930 | 554 | BSDASHGQSGSB  | FALSE | TRUE | FALSE | 15.26 |
| P20930 | 558 | SHGQSGSBSASB  | FALSE | TRUE | FALSE | 24.59 |
| P20930 | 559 | HGQSGSBSASBQ  | FALSE | TRUE | FALSE | 36.93 |
| P20930 | 560 | GQSGSBSASBQT  | FALSE | TRUE | FALSE | 53.89 |
| P20930 | 561 | QSGSBSASBQTB  | FALSE | TRUE | FALSE | 62.43 |
| P20930 | 562 | SGSBSASBQTBN  | FALSE | TRUE | FALSE | 69.99 |
| P20930 | 563 | GSBSASBQTBNE  | FALSE | TRUE | FALSE | 68.15 |
| P20930 | 564 | SBSASBQTBNEE  | FALSE | TRUE | FALSE | 65.47 |
| P20930 | 565 | BSASBQTBNEEQ  | FALSE | TRUE | FALSE | 61.23 |
| P20930 | 566 | SASBQTBNEEQS  | FALSE | TRUE | FALSE | 37.02 |
| P20930 | 567 | ASBQTBNEEQSG  | FALSE | TRUE | FALSE | 38.89 |
| P20930 | 568 | SBQTBNEEQSGD  | FALSE | TRUE | FALSE | 42.25 |
| P20930 | 569 | BQTBNEEQSGDG  | FALSE | TRUE | FALSE | 28.99 |
| P20930 | 570 | QTBNEEQSGDGT  | FALSE | TRUE | FALSE | 11.35 |
| P20930 | 571 | TBNEEQSGDGTB  | FALSE | TRUE | FALSE | 10.31 |
| P20930 | 572 | BNEEQSGDGTBH  | FALSE | TRUE | FALSE | 14.16 |
| P20930 | 575 | EQSGDGTBHSGS  | FALSE | TRUE | FALSE | 15.14 |
| P20930 | 576 | QSGDGTBHSGSB  | FALSE | TRUE | FALSE | 31.38 |
| P20930 | 577 | SGDGTBHSGSBH  | FALSE | TRUE | FALSE | 25.31 |
| P20930 | 578 | GDGTBHSGSBHH  | FALSE | TRUE | FALSE | 22.32 |
| P20930 | 579 | DGTBHSGSBHHE  | FALSE | TRUE | FALSE | 24.79 |
| P20930 | 580 | GTBHSGSBHHEA  | FALSE | TRUE | FALSE | 18.64 |
| P20930 | 581 | TBHSGSBHHEAS  | FALSE | TRUE | FALSE | 19.37 |
| P20930 | 582 | BHSGSBHHEASS  | FALSE | TRUE | FALSE | 21.43 |
| P20930 | 583 | HSGSBHHEASSQ  | FALSE | TRUE | FALSE | 15.58 |
| P20930 | 585 | GSBHHEASSQAD  | FALSE | TRUE | FALSE | 11.16 |
| P20930 | 592 | SSQADSSBHSQV  | FALSE | TRUE | FALSE | 16.23 |
| P20930 | 593 | SQADSSBHSQVG  | FALSE | TRUE | FALSE | 13.24 |
| P20930 | 594 | QADSSBHSQVGQ  | FALSE | TRUE | FALSE | 17.06 |
| P20930 | 595 | ADSSBHSQVGQG  | FALSE | TRUE | FALSE | 11.54 |
| P20930 | 596 | DSSBHSQVGQGQ  | FALSE | TRUE | FALSE | 18.91 |
| P20930 | 597 | SSBHSQVGQGQS  | FALSE | TRUE | FALSE | 20.88 |

|        |     |               |       |      |       |       |
|--------|-----|---------------|-------|------|-------|-------|
| P20930 | 598 | SBHSQVGGQSS   | FALSE | TRUE | FALSE | 16.58 |
| P20930 | 604 | GQQSSGPBTSB   | FALSE | TRUE | FALSE | 15.23 |
| P20930 | 605 | QGGSSGPBTSBN  | FALSE | TRUE | FALSE | 27.74 |
| P20930 | 606 | GQSSGPBTSBNQ  | FALSE | TRUE | FALSE | 38.48 |
| P20930 | 607 | QSSGPBTSBNQG  | FALSE | TRUE | FALSE | 29.18 |
| P20930 | 608 | SSGPBTSBNQGS  | FALSE | TRUE | FALSE | 32.99 |
| P20930 | 609 | SGPBTSBNQGSS  | FALSE | TRUE | FALSE | 36.45 |
| P20930 | 610 | GPBTSBNQGSSV  | FALSE | TRUE | FALSE | 30.61 |
| P20930 | 611 | PBTSBNQGSSVS  | FALSE | TRUE | FALSE | 27.82 |
| P20930 | 612 | BTSBNQGSSVSQ  | FALSE | TRUE | FALSE | 36.34 |
| P20930 | 613 | TSBNQGSSVSQD  | FALSE | TRUE | FALSE | 14.41 |
| P20930 | 632 | EDSEBWGSASB   | FALSE | TRUE | FALSE | 12.59 |
| P20930 | 633 | DSEBWGSASBN   | FALSE | TRUE | FALSE | 19.47 |
| P20930 | 634 | SEBWGSASBNH   | FALSE | TRUE | FALSE | 19.19 |
| P20930 | 635 | EBWGSASBNHH   | FALSE | TRUE | FALSE | 10.53 |
| P20930 | 640 | SASBNHHGSAQE  | FALSE | TRUE | FALSE | 10.14 |
| P20930 | 641 | ASBNHHGSAQEQ  | FALSE | TRUE | FALSE | 10.26 |
| P20930 | 643 | BNHHGSAQEQSB  | FALSE | TRUE | FALSE | 11.41 |
| P20930 | 648 | SAQEQSDGSHB   | FALSE | TRUE | FALSE | 18.22 |
| P20930 | 649 | AQEQSDGSHBP   | FALSE | TRUE | FALSE | 14.7  |
| P20930 | 650 | QEQSDGSHBHP   | FALSE | TRUE | FALSE | 29.35 |
| P20930 | 651 | EQSDGSHBHPBS  | FALSE | TRUE | FALSE | 25.61 |
| P20930 | 652 | QSDGSHBHPBSH  | FALSE | TRUE | FALSE | 38.61 |
| P20930 | 653 | SBDGSHBHPBSHH | FALSE | TRUE | FALSE | 32.2  |
| P20930 | 654 | BDGSHBHPBSHHE | FALSE | TRUE | FALSE | 29.01 |
| P20930 | 655 | DGSHBHPBSHHED | FALSE | TRUE | FALSE | 21.92 |
| P20930 | 656 | GSBHPBSHHEDB  | FALSE | TRUE | FALSE | 20.31 |
| P20930 | 657 | SBHPBSHHEDBA  | FALSE | TRUE | FALSE | 13.17 |
| P20930 | 658 | BHPBSHHEDBAG  | FALSE | TRUE | FALSE | 18.49 |
| P20930 | 659 | HPBSHHEDBAGH  | FALSE | TRUE | FALSE | 18.25 |
| P20930 | 660 | PBSHHEDBAGHG  | FALSE | TRUE | FALSE | 10.03 |
| P20930 | 661 | BSHHEDBAGHGH  | FALSE | TRUE | FALSE | 15.1  |
| P20930 | 664 | HEDBAGHGHSA   | FALSE | TRUE | FALSE | 12.67 |
| P20930 | 667 | BAGHGHSA      | FALSE | TRUE | FALSE | 10.74 |
| P20930 | 672 | HSADSSBKSGTB  | FALSE | TRUE | FALSE | 22.2  |
| P20930 | 673 | SADSSBKSGTBH  | FALSE | TRUE | FALSE | 17.09 |
| P20930 | 674 | ADSSBKSGTBHT  | FALSE | TRUE | FALSE | 15.94 |
| P20930 | 675 | DSSBKSGTBHTQ  | FALSE | TRUE | FALSE | 15.29 |
| P20930 | 680 | SGTBHTQNSSSG  | FALSE | TRUE | FALSE | 28.3  |
| P20930 | 681 | GTBHTQNSSSGQ  | FALSE | TRUE | FALSE | 26.98 |
| P20930 | 697 | HEQABSSAGEBH  | FALSE | TRUE | FALSE | 13.69 |
| P20930 | 698 | EQABSSAGEBHG  | FALSE | TRUE | FALSE | 15.63 |
| P20930 | 699 | QABSSAGEBHGS  | FALSE | TRUE | FALSE | 26.96 |
| P20930 | 700 | ABSSAGEBHGSB  | FALSE | TRUE | FALSE | 33.39 |
| P20930 | 701 | BSSAGEBHGSBH  | FALSE | TRUE | FALSE | 30.31 |
| P20930 | 702 | SSAGEBHGSBHQ  | FALSE | TRUE | FALSE | 27.29 |
| P20930 | 703 | SAGEBHGSBHQ   | FALSE | TRUE | FALSE | 33.19 |
| P20930 | 704 | AGEBHGSBHQ    | FALSE | TRUE | FALSE | 39.71 |
| P20930 | 705 | GEBHGSBHQ     | FALSE | TRUE | FALSE | 38.34 |
| P20930 | 706 | EBHGSBHQ      | FALSE | TRUE | FALSE | 32.23 |
| P20930 | 707 | BHGSBHQ       | FALSE | TRUE | FALSE | 38.58 |
| P20930 | 708 | HGSBHQ        | FALSE | TRUE | FALSE | 30.26 |

|        |     |               |       |      |       |       |
|--------|-----|---------------|-------|------|-------|-------|
| P20930 | 709 | GSBHQLSADSS   | FALSE | TRUE | FALSE | 25.75 |
| P20930 | 710 | SBHQLSADSSB   | FALSE | TRUE | FALSE | 26.28 |
| P20930 | 711 | BHQLSADSSBH   | FALSE | TRUE | FALSE | 16.08 |
| P20930 | 714 | LQSADSSBHSGT  | FALSE | TRUE | FALSE | 10.32 |
| P20930 | 718 | DSSBHSGTGHGQ  | FALSE | TRUE | FALSE | 12.08 |
| P20930 | 729 | QASSAVBDSGHB  | FALSE | TRUE | FALSE | 13.54 |
| P20930 | 730 | ASSAVBDSGHBG  | FALSE | TRUE | FALSE | 19.79 |
| P20930 | 731 | SSAVBDSGHBGS  | FALSE | TRUE | FALSE | 33.54 |
| P20930 | 732 | SAVBDSGHBGSS  | FALSE | TRUE | FALSE | 35.46 |
| P20930 | 733 | AVBDSGHBGSSG  | FALSE | TRUE | FALSE | 30.96 |
| P20930 | 734 | VBDSGHBGSSGS  | FALSE | TRUE | FALSE | 33.38 |
| P20930 | 735 | BDSGHBGSSGSQ  | FALSE | TRUE | FALSE | 28.93 |
| P20930 | 737 | SGHBGSSGSQAT  | FALSE | TRUE | FALSE | 15.58 |
| P20930 | 738 | GHBGSSGSQATD  | FALSE | TRUE | FALSE | 14.94 |
| P20930 | 739 | HBGSSGSQATDS  | FALSE | TRUE | FALSE | 14.59 |
| P20930 | 776 | QESABDBSGEBS  | FALSE | TRUE | FALSE | 10.96 |
| P20930 | 777 | ESABDBSGEBSB  | FALSE | TRUE | FALSE | 15.71 |
| P20930 | 778 | SABDBSGEBSBB  | FALSE | TRUE | FALSE | 17.71 |
| P20930 | 779 | ABDBSGEBSBBS  | FALSE | TRUE | FALSE | 21.94 |
| P20930 | 780 | BDBSGEBSBBSG  | FALSE | TRUE | FALSE | 25.85 |
| P20930 | 781 | DBSGEBSBBSGS  | FALSE | TRUE | FALSE | 23.04 |
| P20930 | 782 | BSGEBSBBSGSF  | FALSE | TRUE | FALSE | 40.29 |
| P20930 | 783 | SGEBSBBSGSFL  | FALSE | TRUE | FALSE | 39.51 |
| P20930 | 784 | GEBBSBBSGSFLY | FALSE | TRUE | FALSE | 23.2  |
| P20930 | 785 | EBSBBSGSFLYQ  | FALSE | TRUE | FALSE | 29.99 |
| P20930 | 786 | BSBBSGSFLYQV  | FALSE | TRUE | FALSE | 15    |
| P20930 | 807 | HGWTGPSTGVBQ  | FALSE | TRUE | FALSE | 16.5  |
| P20930 | 808 | GWTGPSTGVBQG  | FALSE | TRUE | FALSE | 15.87 |
| P20930 | 809 | WTGPSTGVBQGS  | FALSE | TRUE | FALSE | 28.16 |
| P20930 | 810 | TGPSTGVBQGS   | FALSE | TRUE | FALSE | 19.62 |
| P20930 | 811 | GPSTGVBQGS    | FALSE | TRUE | FALSE | 15.71 |
| P20930 | 812 | PSTGVBQGS     | FALSE | TRUE | FALSE | 13.32 |
| P20930 | 813 | STGVBQGS      | FALSE | TRUE | FALSE | 32.21 |
| P20930 | 815 | GVBQGS        | FALSE | TRUE | FALSE | 34.55 |
| P20930 | 816 | VBQGS         | FALSE | TRUE | FALSE | 29.98 |
| P20930 | 817 | BQGS          | FALSE | TRUE | FALSE | 23.6  |
| P20930 | 824 | QABDNSBH      | FALSE | TRUE | FALSE | 22.85 |
| P20930 | 825 | ABDNSBH       | FALSE | TRUE | FALSE | 24.75 |
| P20930 | 826 | BDNSBH        | FALSE | TRUE | FALSE | 26.27 |
| P20930 | 827 | DNSBH         | FALSE | TRUE | FALSE | 11.94 |
| P20930 | 828 | NSBH          | FALSE | TRUE | FALSE | 12.88 |
| P20930 | 829 | SBH           | FALSE | TRUE | FALSE | 13.89 |
| P20930 | 836 | DGQDTIBGHPGS  | FALSE | TRUE | FALSE | 13.58 |
| P20930 | 837 | GQDTIBGHPGSS  | FALSE | TRUE | FALSE | 18.34 |
| P20930 | 838 | QDTIBGHPGSSB  | FALSE | TRUE | FALSE | 26.41 |
| P20930 | 839 | DTIBGHPGSSBB  | FALSE | TRUE | FALSE | 38.3  |
| P20930 | 840 | TIBGHPGSSBBG  | FALSE | TRUE | FALSE | 37.44 |
| P20930 | 841 | IBGHPGSSBBGB  | FALSE | TRUE | FALSE | 12.02 |
| P20930 | 842 | BGHPGSSBBGBQ  | FALSE | TRUE | FALSE | 48.69 |
| P20930 | 843 | GHPGSSBBGBQG  | FALSE | TRUE | FALSE | 31.9  |
| P20930 | 844 | HPGSSBBGBQGS  | FALSE | TRUE | FALSE | 63.2  |
| P20930 | 845 | PGSSBBGBQGSH  | FALSE | TRUE | FALSE | 44.28 |

|        |     |               |       |      |       |       |
|--------|-----|---------------|-------|------|-------|-------|
| P20930 | 846 | GSSBBGBQGSHH  | FALSE | TRUE | FALSE | 42.87 |
| P20930 | 847 | SSBBGBQGSHHE  | FALSE | TRUE | FALSE | 68.15 |
| P20930 | 848 | SBBGBQGSHHEQ  | FALSE | TRUE | FALSE | 66.36 |
| P20930 | 849 | BBGBQGSHHEQS  | FALSE | TRUE | FALSE | 60.42 |
| P20930 | 850 | BGBQGSHHEQSV  | FALSE | TRUE | FALSE | 71.48 |
| P20930 | 851 | GBQGSHHEQSVD  | FALSE | TRUE | FALSE | 31.25 |
| P20930 | 873 | HTTSQGBSDASB  | FALSE | TRUE | FALSE | 14.85 |
| P20930 | 874 | TTSQGBSDASBG  | FALSE | TRUE | FALSE | 23.27 |
| P20930 | 875 | TSQGBSDASBGQ  | FALSE | TRUE | FALSE | 33.06 |
| P20930 | 876 | SQGBSDASBGQS  | FALSE | TRUE | FALSE | 30.94 |
| P20930 | 877 | QGBSDASBGQSG  | FALSE | TRUE | FALSE | 37.33 |
| P20930 | 878 | GBSDASBGQSGS  | FALSE | TRUE | FALSE | 36.13 |
| P20930 | 879 | BSDASBGQSGSB  | FALSE | TRUE | FALSE | 35.8  |
| P20930 | 880 | SDASBGQSGSBS  | FALSE | TRUE | FALSE | 25.54 |
| P20930 | 881 | DASBGQSGSBSA  | FALSE | TRUE | FALSE | 25.83 |
| P20930 | 882 | ASBGQSGSBSAS  | FALSE | TRUE | FALSE | 26.8  |
| P20930 | 883 | SBGQSGSBSASB  | FALSE | TRUE | FALSE | 38.88 |
| P20930 | 884 | BGQSGSBSASBT  | FALSE | TRUE | FALSE | 40.84 |
| P20930 | 885 | GQSGSBSASBTT  | FALSE | TRUE | FALSE | 28.42 |
| P20930 | 886 | QSGSBSASBTTB  | FALSE | TRUE | FALSE | 36.26 |
| P20930 | 887 | SGSBSASBTTBN  | FALSE | TRUE | FALSE | 55.64 |
| P20930 | 888 | G SBSASBTTBNE | FALSE | TRUE | FALSE | 44.25 |
| P20930 | 889 | SBSASBTTBNEE  | FALSE | TRUE | FALSE | 38.07 |
| P20930 | 890 | BSASBTTBNEEQ  | FALSE | TRUE | FALSE | 36.78 |
| P20930 | 891 | SASBTTBNEEQS  | FALSE | TRUE | FALSE | 24.48 |
| P20930 | 892 | ASBTTBNEEQSB  | FALSE | TRUE | FALSE | 31.02 |
| P20930 | 893 | SBTTBNEEQSBD  | FALSE | TRUE | FALSE | 24.96 |
| P20930 | 894 | BTTBNEEQSBDG  | FALSE | TRUE | FALSE | 25.39 |
| P20930 | 895 | TTBNEEQSBDGS  | FALSE | TRUE | FALSE | 13.99 |
| P20930 | 896 | TBNEEQSBDGSB  | FALSE | TRUE | FALSE | 17.45 |
| P20930 | 897 | BNEEQSBDGSBH  | FALSE | TRUE | FALSE | 25.79 |
| P20930 | 898 | NEEQSBDGSBHS  | FALSE | TRUE | FALSE | 13.14 |
| P20930 | 899 | EEQSBDGSBHSG  | FALSE | TRUE | FALSE | 14.68 |
| P20930 | 900 | EQSBDGSBHSGS  | FALSE | TRUE | FALSE | 26.36 |
| P20930 | 901 | Q SBDGSBHSGSB | FALSE | TRUE | FALSE | 41.57 |
| P20930 | 902 | SBDGSBHSGSBH  | FALSE | TRUE | FALSE | 37.13 |
| P20930 | 903 | BDGSBHSGSBHH  | FALSE | TRUE | FALSE | 24.9  |
| P20930 | 904 | DGSBHSGSBHHE  | FALSE | TRUE | FALSE | 21.27 |
| P20930 | 905 | GSBHSGSBHHEA  | FALSE | TRUE | FALSE | 17.32 |
| P20930 | 906 | SBHSGSBHHEAS  | FALSE | TRUE | FALSE | 19.24 |
| P20930 | 907 | BHSGSBHHEASS  | FALSE | TRUE | FALSE | 21.43 |
| P20930 | 908 | HSGSBHHEASSH  | FALSE | TRUE | FALSE | 15.22 |
| P20930 | 909 | SGSBHHEASSHA  | FALSE | TRUE | FALSE | 13.66 |
| P20930 | 910 | GSBHHEASSHAD  | FALSE | TRUE | FALSE | 14.79 |
| P20930 | 916 | ASSHADISBHSQ  | FALSE | TRUE | FALSE | 11.53 |
| P20930 | 919 | HADISBHSQAGQ  | FALSE | TRUE | FALSE | 20.01 |
| P20930 | 920 | ADISBHSQAGQG  | FALSE | TRUE | FALSE | 18.34 |
| P20930 | 921 | DISBHSQAGQQG  | FALSE | TRUE | FALSE | 24.56 |
| P20930 | 922 | ISBHSQAGQQQS  | FALSE | TRUE | FALSE | 19.87 |
| P20930 | 923 | SBHSQAGQQQSE  | FALSE | TRUE | FALSE | 13.21 |
| P20930 | 929 | GQQQSEGSBTSB  | FALSE | TRUE | FALSE | 16.94 |
| P20930 | 930 | QQQSEGSBTSBB  | FALSE | TRUE | FALSE | 28.29 |

|        |      |              |       |      |       |       |
|--------|------|--------------|-------|------|-------|-------|
| P20930 | 931  | GQSEGSBTSBBQ | FALSE | TRUE | FALSE | 44.72 |
| P20930 | 932  | QSEGSBTSBBQG | FALSE | TRUE | FALSE | 43.85 |
| P20930 | 933  | SEGSBTSBBQGS | FALSE | TRUE | FALSE | 50.15 |
| P20930 | 934  | EGSBTSBBQGSS | FALSE | TRUE | FALSE | 49.78 |
| P20930 | 935  | GSBTSBBQGSSV | FALSE | TRUE | FALSE | 51.99 |
| P20930 | 936  | SBTSBBQGSSVS | FALSE | TRUE | FALSE | 63.11 |
| P20930 | 937  | BTSBBQGSSVSQ | FALSE | TRUE | FALSE | 79.79 |
| P20930 | 938  | TSBBQGSSVSQD | FALSE | TRUE | FALSE | 61.49 |
| P20930 | 939  | SBBQGSSVSQDS | FALSE | TRUE | FALSE | 59    |
| P20930 | 940  | BBQGSSVSQDSD | FALSE | TRUE | FALSE | 30.39 |
| P20930 | 957  | EDSEBWSGSASB | FALSE | TRUE | FALSE | 12.59 |
| P20930 | 958  | DSEBWSGSASBN | FALSE | TRUE | FALSE | 19.47 |
| P20930 | 959  | SEBWSGSASBNH | FALSE | TRUE | FALSE | 19.19 |
| P20930 | 960  | EBWGSASBNHB  | FALSE | TRUE | FALSE | 24.92 |
| P20930 | 961  | BWGSASBNHBG  | FALSE | TRUE | FALSE | 30.84 |
| P20930 | 962  | WGSASBNHBGS  | FALSE | TRUE | FALSE | 34.63 |
| P20930 | 963  | SGSASBNHBGSA | FALSE | TRUE | FALSE | 29.68 |
| P20930 | 964  | GSASBNHBGSAQ | FALSE | TRUE | FALSE | 37.18 |
| P20930 | 965  | SASBNHBGSAQE | FALSE | TRUE | FALSE | 60.9  |
| P20930 | 966  | ASBNHBGSAQEQ | FALSE | TRUE | FALSE | 52.99 |
| P20930 | 967  | SBNHBGSAQEQS | FALSE | TRUE | FALSE | 48.36 |
| P20930 | 968  | BNHBGSAQEQSB | FALSE | TRUE | FALSE | 37.45 |
| P20930 | 969  | NHBGSAQEQSBH | FALSE | TRUE | FALSE | 25.12 |
| P20930 | 970  | HBGSAQEQSBHG | FALSE | TRUE | FALSE | 44.63 |
| P20930 | 971  | BGSAQEQSBHGS | FALSE | TRUE | FALSE | 49.14 |
| P20930 | 972  | GSAQEQSBHGSB | FALSE | TRUE | FALSE | 29.32 |
| P20930 | 973  | SAQEQSBHGSBH | FALSE | TRUE | FALSE | 31.33 |
| P20930 | 974  | AQEQSBHGSBHP | FALSE | TRUE | FALSE | 37.45 |
| P20930 | 975  | QEQSBHGSBHPB | FALSE | TRUE | FALSE | 47.9  |
| P20930 | 976  | EQSBHGSBHPBS | FALSE | TRUE | FALSE | 49.1  |
| P20930 | 977  | QSBHGSBHPBSH | FALSE | TRUE | FALSE | 37.18 |
| P20930 | 978  | SBHGSBHPBSHH | FALSE | TRUE | FALSE | 24.81 |
| P20930 | 979  | BHGSBHPBSHHE | FALSE | TRUE | FALSE | 26.13 |
| P20930 | 980  | HGSBHPBSHHED | FALSE | TRUE | FALSE | 23.52 |
| P20930 | 981  | GSBHPBSHHEDB | FALSE | TRUE | FALSE | 20.31 |
| P20930 | 982  | SBHPBSHHEDBA | FALSE | TRUE | FALSE | 13.17 |
| P20930 | 983  | BHPBSHHEDBAG | FALSE | TRUE | FALSE | 18.49 |
| P20930 | 984  | HPBSHHEDBAGH | FALSE | TRUE | FALSE | 18.25 |
| P20930 | 985  | PBSHHEDBAGHG | FALSE | TRUE | FALSE | 10.03 |
| P20930 | 986  | BSHHEDBAGHGH | FALSE | TRUE | FALSE | 15.1  |
| P20930 | 989  | HEDBAGHGHSA  | FALSE | TRUE | FALSE | 12.67 |
| P20930 | 992  | BAGHGHSA     | FALSE | TRUE | FALSE | 10.74 |
| P20930 | 995  | HGHSADSSBQSG | FALSE | TRUE | FALSE | 10.43 |
| P20930 | 996  | GHSADSSBQSGT | FALSE | TRUE | FALSE | 10.21 |
| P20930 | 998  | SADSSBQSGTPH | FALSE | TRUE | FALSE | 11.33 |
| P20930 | 999  | ADSSBQSGTPHA | FALSE | TRUE | FALSE | 10.17 |
| P20930 | 1000 | DSSBQSGTPHAE | FALSE | TRUE | FALSE | 12.04 |
| P20930 | 1001 | SSBQSGTPHAET | FALSE | TRUE | FALSE | 21.99 |
| P20930 | 1002 | SBQSGTPHAETS | FALSE | TRUE | FALSE | 19.93 |
| P20930 | 1022 | HEQABSSPGEBH | FALSE | TRUE | FALSE | 11.12 |
| P20930 | 1023 | EQABSSPGEBHG | FALSE | TRUE | FALSE | 11.26 |
| P20930 | 1024 | QABSSPGEBHGS | FALSE | TRUE | FALSE | 24.28 |

|        |      |              |       |      |       |       |
|--------|------|--------------|-------|------|-------|-------|
| P20930 | 1025 | ABSSPGEBHGSB | FALSE | TRUE | FALSE | 35.51 |
| P20930 | 1026 | BSSPGEBHGSBH | FALSE | TRUE | FALSE | 34.23 |
| P20930 | 1027 | SSPGEBHGSBHQ | FALSE | TRUE | FALSE | 27.44 |
| P20930 | 1028 | SPGEBHGSBHQQ | FALSE | TRUE | FALSE | 22.7  |
| P20930 | 1029 | PGEBHGSBHQQS | FALSE | TRUE | FALSE | 18.56 |
| P20930 | 1030 | GEBHGSBHQQSA | FALSE | TRUE | FALSE | 26.94 |
| P20930 | 1031 | EBHGSBHQQSAD | FALSE | TRUE | FALSE | 27.56 |
| P20930 | 1032 | BHGSBHQQSADS | FALSE | TRUE | FALSE | 29.89 |
| P20930 | 1033 | HGSBHQQSADSS | FALSE | TRUE | FALSE | 18.47 |
| P20930 | 1034 | GSBHQQSADSSB | FALSE | TRUE | FALSE | 22.42 |
| P20930 | 1035 | SBHQQSADSSBH | FALSE | TRUE | FALSE | 20.5  |
| P20930 | 1036 | BHQQSADSSBHS | FALSE | TRUE | FALSE | 13.43 |
| P20930 | 1037 | HQQSADSSBHS  | FALSE | TRUE | FALSE | 10.27 |
| P20930 | 1040 | SADSSBHS     | FALSE | TRUE | FALSE | 17.8  |
| P20930 | 1041 | ADSSBHS      | FALSE | TRUE | FALSE | 10.53 |
| P20930 | 1042 | DSSBHS       | FALSE | TRUE | FALSE | 28.76 |
| P20930 | 1043 | SSBHS        | FALSE | TRUE | FALSE | 18.48 |
| P20930 | 1044 | SBHS         | FALSE | TRUE | FALSE | 25.36 |
| P20930 | 1045 | BHS          | FALSE | TRUE | FALSE | 30.15 |
| P20930 | 1046 | HSGIPBBQASSA | FALSE | TRUE | FALSE | 27.38 |
| P20930 | 1047 | SGIPBBQASSAV | FALSE | TRUE | FALSE | 34.28 |
| P20930 | 1048 | GIPBBQASSAVB | FALSE | TRUE | FALSE | 55.15 |
| P20930 | 1049 | IPBBQASSAVBD | FALSE | TRUE | FALSE | 54.02 |
| P20930 | 1050 | PBBQASSAVBDS | FALSE | TRUE | FALSE | 39.36 |
| P20930 | 1051 | BBQASSAVBDSG | FALSE | TRUE | FALSE | 49.95 |
| P20930 | 1052 | BQASSAVBDSGH | FALSE | TRUE | FALSE | 19.15 |
| P20930 | 1055 | SSAVBDSGH    | FALSE | TRUE | FALSE | 11.52 |
| P20930 | 1057 | AVBDSGH      | FALSE | TRUE | FALSE | 10.3  |
| P20930 | 1099 | HQESABDWSGGB | FALSE | TRUE | FALSE | 10.37 |
| P20930 | 1100 | QESABDWSGGBS | FALSE | TRUE | FALSE | 15.66 |
| P20930 | 1101 | ESABDWSGGBSG | FALSE | TRUE | FALSE | 13.35 |
| P20930 | 1102 | SABDWSGGBSGB | FALSE | TRUE | FALSE | 19.72 |
| P20930 | 1103 | ABDWSGGBSGBS | FALSE | TRUE | FALSE | 24.71 |
| P20930 | 1104 | BDWSGGBSGBSG | FALSE | TRUE | FALSE | 22.01 |
| P20930 | 1105 | DWSGGBSGBSGS | FALSE | TRUE | FALSE | 21.72 |
| P20930 | 1106 | WSGGBSGBSGSF | FALSE | TRUE | FALSE | 20.12 |
| P20930 | 1107 | SGGBSGBSGSFI | FALSE | TRUE | FALSE | 35.13 |
| P20930 | 1108 | GGBSGBSGSFIY | FALSE | TRUE | FALSE | 17.1  |
| P20930 | 1109 | GBSGBSGSFIYQ | FALSE | TRUE | FALSE | 19.12 |
| P20930 | 1124 | HEQSESAHGBTB | FALSE | TRUE | FALSE | 11.77 |
| P20930 | 1126 | QSESAHGBTBTS | FALSE | TRUE | FALSE | 14.83 |
| P20930 | 1127 | SESAHGBTBTST | FALSE | TRUE | FALSE | 15.14 |
| P20930 | 1128 | ESAHGBTBTSTG | FALSE | TRUE | FALSE | 15.17 |
| P20930 | 1129 | SAHGBTBTSTGB | FALSE | TRUE | FALSE | 32.43 |
| P20930 | 1130 | AHGBTBTSTGBB | FALSE | TRUE | FALSE | 23.5  |
| P20930 | 1131 | HGBTBTSTGBBQ | FALSE | TRUE | FALSE | 41.6  |
| P20930 | 1132 | GBTBTSTGBBQG | FALSE | TRUE | FALSE | 52.76 |
| P20930 | 1133 | BTBTSTGBBQGS | FALSE | TRUE | FALSE | 56.16 |
| P20930 | 1134 | TBTSTGBBQGS  | FALSE | TRUE | FALSE | 42.41 |
| P20930 | 1135 | BTSTGBBQGS   | FALSE | TRUE | FALSE | 40.42 |
| P20930 | 1136 | TSTGBBQGS    | FALSE | TRUE | FALSE | 43.38 |
| P20930 | 1137 | STGBBQGS     | FALSE | TRUE | FALSE | 46.76 |



|        |      |               |       |      |       |       |
|--------|------|---------------|-------|------|-------|-------|
| P20930 | 1138 | TGBBQGSHEQA   | FALSE | TRUE | FALSE | 12.84 |
| P20930 | 1139 | GBBQGSHEQAB   | FALSE | TRUE | FALSE | 35.01 |
| P20930 | 1140 | BBQGSHEQABD   | FALSE | TRUE | FALSE | 38.03 |
| P20930 | 1141 | BQGSHEQABDS   | FALSE | TRUE | FALSE | 24.52 |
| P20930 | 1145 | HHEQABDSSBHS  | FALSE | TRUE | FALSE | 13.46 |
| P20930 | 1146 | HEQABDSSBHSA  | FALSE | TRUE | FALSE | 14.45 |
| P20930 | 1147 | EQABDSSBHSAS  | FALSE | TRUE | FALSE | 10.7  |
| P20930 | 1148 | QABDSSBHSASQ  | FALSE | TRUE | FALSE | 23.23 |
| P20930 | 1149 | ABDSSBHSASQE  | FALSE | TRUE | FALSE | 24.13 |
| P20930 | 1150 | BDSSBHSASQEG  | FALSE | TRUE | FALSE | 21.7  |
| P20930 | 1151 | DSSBHSASQEGQ  | FALSE | TRUE | FALSE | 12.34 |
| P20930 | 1152 | SSBHSASQEGQD  | FALSE | TRUE | FALSE | 13.93 |
| P20930 | 1153 | SBHSASQEGQDT  | FALSE | TRUE | FALSE | 12.61 |
| P20930 | 1161 | GQDTIBAHPGSB  | FALSE | TRUE | FALSE | 27.75 |
| P20930 | 1162 | QDTIBAHPGSBB  | FALSE | TRUE | FALSE | 23.07 |
| P20930 | 1163 | DTIBAHPGSBBG  | FALSE | TRUE | FALSE | 26.16 |
| P20930 | 1164 | TIBAHPGSBBGG  | FALSE | TRUE | FALSE | 11.68 |
| P20930 | 1166 | BAHPGSBBGGBQ  | FALSE | TRUE | FALSE | 24.93 |
| P20930 | 1167 | AHPGSBBGGBQG  | FALSE | TRUE | FALSE | 26.86 |
| P20930 | 1168 | HPGSBBGGBQGS  | FALSE | TRUE | FALSE | 49.37 |
| P20930 | 1169 | PGSBBGGBQGSH  | FALSE | TRUE | FALSE | 38.68 |
| P20930 | 1170 | GSBBGGBQGSHH  | FALSE | TRUE | FALSE | 43.8  |
| P20930 | 1171 | SBBGGBQGSHHE  | FALSE | TRUE | FALSE | 54.4  |
| P20930 | 1172 | BBGGBQGSHHEQ  | FALSE | TRUE | FALSE | 49.81 |
| P20930 | 1173 | BGGGBQGSHHEQS | FALSE | TRUE | FALSE | 56.91 |
| P20930 | 1174 | GGBQGSHEQSV   | FALSE | TRUE | FALSE | 49.6  |
| P20930 | 1175 | GBQGSHEQSVD   | FALSE | TRUE | FALSE | 31.25 |
| P20930 | 1200 | SQGSDASHGQS   | FALSE | TRUE | FALSE | 10.89 |
| P20930 | 1201 | QGBSDASHGQSG  | FALSE | TRUE | FALSE | 13.73 |
| P20930 | 1202 | GBSDASHGQSGS  | FALSE | TRUE | FALSE | 12.39 |
| P20930 | 1203 | BSDASHGQSGSB  | FALSE | TRUE | FALSE | 15.26 |
| P20930 | 1207 | SHGQSGSBSASB  | FALSE | TRUE | FALSE | 24.59 |
| P20930 | 1208 | HGQSGSBSASBQ  | FALSE | TRUE | FALSE | 36.93 |
| P20930 | 1209 | GQSGSBSASBQT  | FALSE | TRUE | FALSE | 53.89 |
| P20930 | 1210 | QSGSBSASBQTB  | FALSE | TRUE | FALSE | 62.43 |
| P20930 | 1211 | SGSBSASBQTBK  | FALSE | TRUE | FALSE | 24.51 |
| P20930 | 1212 | GSBSASBQTBKD  | FALSE | TRUE | FALSE | 62.11 |
| P20930 | 1213 | SBSASBQTBKDK  | FALSE | TRUE | FALSE | 16.03 |
| P20930 | 1214 | BSASBQTBKDKQ  | FALSE | TRUE | FALSE | 16.23 |
| P20930 | 1215 | SASBQTBKDKQS  | FALSE | TRUE | FALSE | 16.06 |
| P20930 | 1216 | ASBQTBKDKQSG  | FALSE | TRUE | FALSE | 13.53 |
| P20930 | 1217 | SBQTBKDKQSGD  | FALSE | TRUE | FALSE | 42.54 |
| P20930 | 1218 | BQTBKDKQSGDG  | FALSE | TRUE | FALSE | 16.59 |
| P20930 | 1220 | TBKDKQSGDGSB  | FALSE | TRUE | FALSE | 12.45 |
| P20930 | 1223 | DKQSGDGSBHSG  | FALSE | TRUE | FALSE | 10.39 |
| P20930 | 1225 | QSGDGSBHSGSB  | FALSE | TRUE | FALSE | 29.17 |
| P20930 | 1226 | SGDGSBHSGSBH  | FALSE | TRUE | FALSE | 23.67 |
| P20930 | 1227 | GDGSBHSGSBHH  | FALSE | TRUE | FALSE | 16.38 |
| P20930 | 1228 | DGSBHSGSBHHE  | FALSE | TRUE | FALSE | 21.27 |
| P20930 | 1229 | GSBHSGSBHHEA  | FALSE | TRUE | FALSE | 17.32 |
| P20930 | 1230 | SBHSGSBHHEAA  | FALSE | TRUE | FALSE | 10.3  |
| P20930 | 1231 | BHSGSBHHEAAS  | FALSE | TRUE | FALSE | 13.71 |

|        |      |              |       |      |       |       |
|--------|------|--------------|-------|------|-------|-------|
| P20930 | 1232 | HSGSBHHEAASW | FALSE | TRUE | FALSE | 13.6  |
| P20930 | 1234 | GSBHHEAASWAD | FALSE | TRUE | FALSE | 13.38 |
| P20930 | 1235 | SBHHEAASWADS | FALSE | TRUE | FALSE | 10.58 |
| P20930 | 1239 | EAASWADSSBHS | FALSE | TRUE | FALSE | 10.26 |
| P20930 | 1240 | AASWADSSBHSQ | FALSE | TRUE | FALSE | 12.89 |
| P20930 | 1241 | ASWADSSBHSQV | FALSE | TRUE | FALSE | 12.5  |
| P20930 | 1242 | SWADSSBHSQVG | FALSE | TRUE | FALSE | 14.37 |
| P20930 | 1243 | WADSSBHSQVGQ | FALSE | TRUE | FALSE | 16.89 |
| P20930 | 1244 | ADSSBHSQVGQE | FALSE | TRUE | FALSE | 11.97 |
| P20930 | 1245 | DSSBHSQVGQEQ | FALSE | TRUE | FALSE | 15.98 |
| P20930 | 1246 | SSBHSQVGQEQS | FALSE | TRUE | FALSE | 18.96 |
| P20930 | 1247 | SBHSQVGQEQSS | FALSE | TRUE | FALSE | 16.94 |
| P20930 | 1253 | GQEQSSGSBTSB | FALSE | TRUE | FALSE | 17.73 |
| P20930 | 1254 | QEQSSGSBTSBH | FALSE | TRUE | FALSE | 24    |
| P20930 | 1255 | EQSSGSBTSBHQ | FALSE | TRUE | FALSE | 26.71 |
| P20930 | 1256 | QSSGSBTSBHQG | FALSE | TRUE | FALSE | 25.47 |
| P20930 | 1257 | SSGSBTSBHQGS | FALSE | TRUE | FALSE | 26.61 |
| P20930 | 1258 | SGSBTSBHQGSS | FALSE | TRUE | FALSE | 29.58 |
| P20930 | 1259 | GSBTSBHQGSSV | FALSE | TRUE | FALSE | 26.46 |
| P20930 | 1260 | SBTSBHQGSSVS | FALSE | TRUE | FALSE | 35.17 |
| P20930 | 1261 | BTSBHQGSSVSQ | FALSE | TRUE | FALSE | 28.23 |
| P20930 | 1262 | TSBHQGSSVSQD | FALSE | TRUE | FALSE | 15.78 |
| P20930 | 1263 | SBHQGSSVSQDS | FALSE | TRUE | FALSE | 12.54 |
| P20930 | 1282 | DSEBLSGSASBN | FALSE | TRUE | FALSE | 15.8  |
| P20930 | 1283 | SEBLSGSASBNH | FALSE | TRUE | FALSE | 14.51 |
| P20930 | 1288 | GSASBNHHGSSB | FALSE | TRUE | FALSE | 13.18 |
| P20930 | 1289 | SASBNHHGSSBE | FALSE | TRUE | FALSE | 38.31 |
| P20930 | 1290 | ASBNHHGSSBEQ | FALSE | TRUE | FALSE | 25.79 |
| P20930 | 1291 | SBNHHGSSBEQS | FALSE | TRUE | FALSE | 22.22 |
| P20930 | 1292 | BNHHGSSBEQSB | FALSE | TRUE | FALSE | 26.35 |
| P20930 | 1293 | NHHGSSBEQSBD | FALSE | TRUE | FALSE | 12.13 |
| P20930 | 1294 | HHGSSBEQSBDG | FALSE | TRUE | FALSE | 17.57 |
| P20930 | 1295 | HGSSBEQSBDGS | FALSE | TRUE | FALSE | 21.33 |
| P20930 | 1296 | GSSBEQSBDGSB | FALSE | TRUE | FALSE | 33.16 |
| P20930 | 1297 | SSBEQSBDGSBH | FALSE | TRUE | FALSE | 47.51 |
| P20930 | 1298 | SBEQSBDGSBHP | FALSE | TRUE | FALSE | 40.35 |
| P20930 | 1299 | BEQSBDGSBHPG | FALSE | TRUE | FALSE | 39.78 |
| P20930 | 1300 | EQSBDGSBHPGF | FALSE | TRUE | FALSE | 20.35 |
| P20930 | 1301 | QSBDGSBHPGFH | FALSE | TRUE | FALSE | 32.15 |
| P20930 | 1302 | SBDGSBHPGFHQ | FALSE | TRUE | FALSE | 27.85 |
| P20930 | 1303 | BDGSBHPGFHQE | FALSE | TRUE | FALSE | 16.63 |
| P20930 | 1304 | DGSBHPGFHQED | FALSE | TRUE | FALSE | 11.68 |
| P20930 | 1307 | BHPGFHQEDBAS | FALSE | TRUE | FALSE | 11.37 |
| P20930 | 1310 | GFHQEDBASHGH | FALSE | TRUE | FALSE | 12.6  |
| P20930 | 1311 | FHQEDBASHGHS | FALSE | TRUE | FALSE | 11.75 |
| P20930 | 1316 | BASHGHSADSSB | FALSE | TRUE | FALSE | 12.37 |
| P20930 | 1319 | HGHSADSSBQSG | FALSE | TRUE | FALSE | 10.43 |
| P20930 | 1320 | GHSADSSBQSGT | FALSE | TRUE | FALSE | 10.21 |
| P20930 | 1322 | SADSSBQSGTHH | FALSE | TRUE | FALSE | 11.28 |
| P20930 | 1323 | ADSSBQSGTHHT | FALSE | TRUE | FALSE | 12.59 |
| P20930 | 1324 | DSSBQSGTHHTE | FALSE | TRUE | FALSE | 17.91 |
| P20930 | 1325 | SSBQSGTHHTES | FALSE | TRUE | FALSE | 30.7  |

|        |      |              |       |      |       |       |
|--------|------|--------------|-------|------|-------|-------|
| P20930 | 1326 | SBQSGTHHTESS | FALSE | TRUE | FALSE | 28.98 |
| P20930 | 1346 | HEQABSSPGEBH | FALSE | TRUE | FALSE | 11.12 |
| P20930 | 1347 | EQABSSPGEBHG | FALSE | TRUE | FALSE | 11.26 |
| P20930 | 1348 | QABSSPGEBHGS | FALSE | TRUE | FALSE | 24.28 |
| P20930 | 1349 | ABSSPGEBHGSB | FALSE | TRUE | FALSE | 35.51 |
| P20930 | 1350 | BSSPGEBHGSBH | FALSE | TRUE | FALSE | 34.23 |
| P20930 | 1351 | SSPGEBHGSBHQ | FALSE | TRUE | FALSE | 27.44 |
| P20930 | 1352 | SPGEBHGSBHQQ | FALSE | TRUE | FALSE | 22.7  |
| P20930 | 1353 | PGEBHGSBHQQS | FALSE | TRUE | FALSE | 18.56 |
| P20930 | 1354 | GEBHGSBHQQSA | FALSE | TRUE | FALSE | 26.94 |
| P20930 | 1355 | EBHGSBHQQSAD | FALSE | TRUE | FALSE | 27.56 |
| P20930 | 1356 | BHGSBHQQSADS | FALSE | TRUE | FALSE | 29.89 |
| P20930 | 1357 | HGSBHQQSADSS | FALSE | TRUE | FALSE | 18.47 |
| P20930 | 1358 | GSBHQQSADSSB | FALSE | TRUE | FALSE | 22.42 |
| P20930 | 1359 | SBHQQSADSSBH | FALSE | TRUE | FALSE | 20.5  |
| P20930 | 1360 | BHQQSADSSBHS | FALSE | TRUE | FALSE | 13.43 |
| P20930 | 1361 | HQQSADSSBHS  | FALSE | TRUE | FALSE | 10.27 |
| P20930 | 1365 | ADSSBHS      | FALSE | TRUE | FALSE | 17.66 |
| P20930 | 1366 | DSSBHS       | FALSE | TRUE | FALSE | 30.39 |
| P20930 | 1367 | SSBHS        | FALSE | TRUE | FALSE | 18.4  |
| P20930 | 1368 | SBHS         | FALSE | TRUE | FALSE | 20.8  |
| P20930 | 1369 | BHS          | FALSE | TRUE | FALSE | 20.46 |
| P20930 | 1370 | HSG          | FALSE | TRUE | FALSE | 16.77 |
| P20930 | 1371 | SG           | FALSE | TRUE | FALSE | 22.16 |
| P20930 | 1372 | GIG          | FALSE | TRUE | FALSE | 25.04 |
| P20930 | 1373 | IGH          | FALSE | TRUE | FALSE | 32.14 |
| P20930 | 1374 | GHB          | FALSE | TRUE | FALSE | 33.49 |
| P20930 | 1375 | HB           | FALSE | TRUE | FALSE | 35.8  |
| P20930 | 1376 | BQ           | FALSE | TRUE | FALSE | 19.15 |
| P20930 | 1377 | Q            | FALSE | TRUE | FALSE | 13.54 |
| P20930 | 1378 | ASS          | FALSE | TRUE | FALSE | 19.79 |
| P20930 | 1379 | SS           | FALSE | TRUE | FALSE | 33.54 |
| P20930 | 1380 | SA           | FALSE | TRUE | FALSE | 35.46 |
| P20930 | 1381 | AV           | FALSE | TRUE | FALSE | 30.96 |
| P20930 | 1382 | VB           | FALSE | TRUE | FALSE | 33.38 |
| P20930 | 1383 | BD           | FALSE | TRUE | FALSE | 28.93 |
| P20930 | 1384 | DS           | FALSE | TRUE | FALSE | 20.1  |
| P20930 | 1385 | SG           | FALSE | TRUE | FALSE | 21.62 |
| P20930 | 1386 | GH           | FALSE | TRUE | FALSE | 16.41 |
| P20930 | 1387 | HB           | FALSE | TRUE | FALSE | 15.27 |
| P20930 | 1419 | HQ           | FALSE | TRUE | FALSE | 18.2  |
| P20930 | 1420 | QQ           | FALSE | TRUE | FALSE | 24.76 |
| P20930 | 1421 | Q            | FALSE | TRUE | FALSE | 17.03 |
| P20930 | 1422 | SH           | FALSE | TRUE | FALSE | 14.27 |
| P20930 | 1423 | H            | FALSE | TRUE | FALSE | 15.22 |
| P20930 | 1424 | K            | FALSE | TRUE | FALSE | 18.38 |
| P20930 | 1425 | E            | FALSE | TRUE | FALSE | 16.25 |
| P20930 | 1426 | S            | FALSE | TRUE | FALSE | 33.92 |
| P20930 | 1427 | AB           | FALSE | TRUE | FALSE | 30.29 |
| P20930 | 1428 | B            | FALSE | TRUE | FALSE | 24.25 |
| P20930 | 1429 | G            | FALSE | TRUE | FALSE | 12.47 |
| P20930 | 1430 | Q            | FALSE | TRUE | FALSE | 16.19 |

|        |      |              |       |      |       |       |
|--------|------|--------------|-------|------|-------|-------|
| P20930 | 1431 | SGESSGBSBSFL | FALSE | TRUE | FALSE | 12.75 |
| P20930 | 1455 | HGQTAPSTGGBQ | FALSE | TRUE | FALSE | 12.92 |
| P20930 | 1456 | GQTAPSTGGBQG | FALSE | TRUE | FALSE | 11.5  |
| P20930 | 1457 | QTAPSTGGBQGS | FALSE | TRUE | FALSE | 15.84 |
| P20930 | 1458 | TAPSTGGBQGSB | FALSE | TRUE | FALSE | 41.83 |
| P20930 | 1459 | APSTGGBQGSBH | FALSE | TRUE | FALSE | 33.71 |
| P20930 | 1460 | PSTGGBQGSBHE | FALSE | TRUE | FALSE | 37.79 |
| P20930 | 1461 | STGGBQGSBHEQ | FALSE | TRUE | FALSE | 58.76 |
| P20930 | 1462 | TGGBQGSBHEQA | FALSE | TRUE | FALSE | 16.93 |
| P20930 | 1463 | GGBQGSBHEQAB | FALSE | TRUE | FALSE | 48.6  |
| P20930 | 1464 | GBQGSBHEQABN | FALSE | TRUE | FALSE | 52.99 |
| P20930 | 1465 | BQGSBHEQABNS | FALSE | TRUE | FALSE | 55.09 |
| P20930 | 1466 | QGSBHEQABNSS | FALSE | TRUE | FALSE | 27.49 |
| P20930 | 1467 | GSBHEQABNSSB | FALSE | TRUE | FALSE | 33.21 |
| P20930 | 1468 | SBHEQABNSSBH | FALSE | TRUE | FALSE | 29.37 |
| P20930 | 1469 | BHEQABNSSBHS | FALSE | TRUE | FALSE | 28.04 |
| P20930 | 1470 | HEQABNSSBHSA | FALSE | TRUE | FALSE | 23.04 |
| P20930 | 1471 | EQABNSSBHSAS | FALSE | TRUE | FALSE | 16.74 |
| P20930 | 1472 | QABNSSBHSASQ | FALSE | TRUE | FALSE | 31.93 |
| P20930 | 1473 | ABNSSBHSASQD | FALSE | TRUE | FALSE | 30.62 |
| P20930 | 1474 | BNSSBHSASQDG | FALSE | TRUE | FALSE | 29.57 |
| P20930 | 1475 | NSSBHSASQDGQ | FALSE | TRUE | FALSE | 12.91 |
| P20930 | 1476 | SSBHSASQDGQD | FALSE | TRUE | FALSE | 15.81 |
| P20930 | 1477 | SBHSASQDGQDT | FALSE | TRUE | FALSE | 13.89 |
| P20930 | 1484 | DGQDTIBGHPGS | FALSE | TRUE | FALSE | 13.58 |
| P20930 | 1485 | GQDTIBGHPGSS | FALSE | TRUE | FALSE | 18.34 |
| P20930 | 1486 | QDTIBGHPGSSB | FALSE | TRUE | FALSE | 26.41 |
| P20930 | 1487 | DTIBGHPGSSBG | FALSE | TRUE | FALSE | 35.92 |
| P20930 | 1488 | TIBGHPGSSBGG | FALSE | TRUE | FALSE | 20.7  |
| P20930 | 1489 | IBGHPGSSBGGB | FALSE | TRUE | FALSE | 23    |
| P20930 | 1490 | BGHPGSSBGGBQ | FALSE | TRUE | FALSE | 60.88 |
| P20930 | 1491 | GHPGSSBGGBQG | FALSE | TRUE | FALSE | 44.25 |
| P20930 | 1492 | HPGSSBGGBQGS | FALSE | TRUE | FALSE | 67.16 |
| P20930 | 1493 | PGSSBGGBQGSY | FALSE | TRUE | FALSE | 32.14 |
| P20930 | 1494 | GSSBGGBQGSYH | FALSE | TRUE | FALSE | 41.6  |
| P20930 | 1495 | SSBGGBQGSYHE | FALSE | TRUE | FALSE | 65.8  |
| P20930 | 1496 | SBGGBQGSYHEQ | FALSE | TRUE | FALSE | 61.98 |
| P20930 | 1497 | BGGBQGSYHEQS | FALSE | TRUE | FALSE | 63.89 |
| P20930 | 1498 | GGBQGSYHEQSV | FALSE | TRUE | FALSE | 55.58 |
| P20930 | 1499 | GBQGSYHEQSVD | FALSE | TRUE | FALSE | 40.92 |
| P20930 | 1500 | BQGSYHEQSVDB | FALSE | TRUE | FALSE | 10.62 |
| P20930 | 1507 | QSVDBSGHSGYH | FALSE | TRUE | FALSE | 10.21 |
| P20930 | 1516 | GYHHSHTTPQGB | FALSE | TRUE | FALSE | 13.18 |
| P20930 | 1517 | YHHSHTTPQGBS | FALSE | TRUE | FALSE | 11.5  |
| P20930 | 1525 | QGBSDASHGQSG | FALSE | TRUE | FALSE | 13.73 |
| P20930 | 1526 | GBSDASHGQSGP | FALSE | TRUE | FALSE | 14.4  |
| P20930 | 1527 | BSDASHGQSGPB | FALSE | TRUE | FALSE | 10.83 |
| P20930 | 1531 | SHGQSGPBSASB | FALSE | TRUE | FALSE | 19.93 |
| P20930 | 1532 | HGQSGPBSASBQ | FALSE | TRUE | FALSE | 28.93 |
| P20930 | 1533 | GQSGPBSASBQT | FALSE | TRUE | FALSE | 31.15 |
| P20930 | 1534 | QSGPBSASBQTB | FALSE | TRUE | FALSE | 51.33 |
| P20930 | 1535 | SGPBSASBQTBN | FALSE | TRUE | FALSE | 56.4  |

|        |      |              |       |      |       |       |
|--------|------|--------------|-------|------|-------|-------|
| P20930 | 1536 | GPBSASBQTBNE | FALSE | TRUE | FALSE | 56.3  |
| P20930 | 1537 | PBSASBQTBNEE | FALSE | TRUE | FALSE | 28.78 |
| P20930 | 1538 | BSASBQTBNEEQ | FALSE | TRUE | FALSE | 61.23 |
| P20930 | 1539 | SASBQTBNEEQS | FALSE | TRUE | FALSE | 37.02 |
| P20930 | 1540 | ASBQTBNEEQSG | FALSE | TRUE | FALSE | 38.89 |
| P20930 | 1541 | SBQTBNEEQSGD | FALSE | TRUE | FALSE | 42.25 |
| P20930 | 1542 | BQTBNEEQSGDG | FALSE | TRUE | FALSE | 28.99 |
| P20930 | 1543 | QTBNEEQSGDGS | FALSE | TRUE | FALSE | 10    |
| P20930 | 1544 | TBNEEQSGDGSB | FALSE | TRUE | FALSE | 10.67 |
| P20930 | 1545 | BNEEQSGDGSBH | FALSE | TRUE | FALSE | 15.26 |
| P20930 | 1548 | EQSGDGSBHSGS | FALSE | TRUE | FALSE | 11.05 |
| P20930 | 1549 | QSGDGSBHSGSB | FALSE | TRUE | FALSE | 29.17 |
| P20930 | 1550 | SGDGSBHSGSBH | FALSE | TRUE | FALSE | 23.67 |
| P20930 | 1551 | GDGSBHSGSBHH | FALSE | TRUE | FALSE | 16.38 |
| P20930 | 1552 | DGSBHSGSBHHE | FALSE | TRUE | FALSE | 21.27 |
| P20930 | 1553 | GSBHSGSBHHEP | FALSE | TRUE | FALSE | 18.06 |
| P20930 | 1554 | SBHSGSBHHEPS | FALSE | TRUE | FALSE | 24.37 |
| P20930 | 1555 | BHSGSBHHEPST | FALSE | TRUE | FALSE | 17.3  |
| P20930 | 1556 | HSGSBHHEPSTB | FALSE | TRUE | FALSE | 30.54 |
| P20930 | 1557 | SGSBHHEPSTBA | FALSE | TRUE | FALSE | 29.95 |
| P20930 | 1558 | GSBHHEPSTBAG | FALSE | TRUE | FALSE | 20.27 |
| P20930 | 1559 | SBHHEPSTBAGS | FALSE | TRUE | FALSE | 33.96 |
| P20930 | 1560 | BHHEPSTBAGSS | FALSE | TRUE | FALSE | 32.2  |
| P20930 | 1561 | HHEPSTBAGSSB | FALSE | TRUE | FALSE | 37.43 |
| P20930 | 1562 | HEPSTBAGSSBH | FALSE | TRUE | FALSE | 35.9  |
| P20930 | 1563 | EPSTBAGSSBHS | FALSE | TRUE | FALSE | 36.71 |
| P20930 | 1564 | PSTBAGSSBHSQ | FALSE | TRUE | FALSE | 32.32 |
| P20930 | 1565 | STBAGSSBHSQV | FALSE | TRUE | FALSE | 38.58 |
| P20930 | 1566 | TBAGSSBHSQVG | FALSE | TRUE | FALSE | 37.78 |
| P20930 | 1567 | BAGSSBHSQVGQ | FALSE | TRUE | FALSE | 25.36 |
| P20930 | 1568 | AGSSBHSQVGQG | FALSE | TRUE | FALSE | 16.16 |
| P20930 | 1569 | GSSBHSQVGQGE | FALSE | TRUE | FALSE | 15.93 |
| P20930 | 1570 | SSBHSQVGQGES | FALSE | TRUE | FALSE | 17.23 |
| P20930 | 1571 | SBHSQVGQGESA | FALSE | TRUE | FALSE | 12.12 |
| P20930 | 1578 | QGESAGSKTSBB | FALSE | TRUE | FALSE | 28.12 |
| P20930 | 1579 | GESAGSKTSBBQ | FALSE | TRUE | FALSE | 23.62 |
| P20930 | 1580 | ESAGSKTSBBQG | FALSE | TRUE | FALSE | 27.26 |
| P20930 | 1583 | GSKTSBBQGSSV | FALSE | TRUE | FALSE | 13.42 |
| P20930 | 1584 | SKTSBBQGSSVS | FALSE | TRUE | FALSE | 34.94 |
| P20930 | 1585 | KTSBBQGSSVSQ | FALSE | TRUE | FALSE | 24.99 |
| P20930 | 1586 | TSBBQGSSVSQD | FALSE | TRUE | FALSE | 61.49 |
| P20930 | 1587 | SBBQGSSVSQDB | FALSE | TRUE | FALSE | 53.1  |
| P20930 | 1588 | BBQGSSVSQDBD | FALSE | TRUE | FALSE | 33.71 |
| P20930 | 1589 | BQGSSVSQDBDS | FALSE | TRUE | FALSE | 15.28 |
| P20930 | 1606 | DSEBBSESASBN | FALSE | TRUE | FALSE | 13.77 |
| P20930 | 1607 | SEBBSESASBNH | FALSE | TRUE | FALSE | 22.46 |
| P20930 | 1608 | EBBSESASBNHY | FALSE | TRUE | FALSE | 22.86 |
| P20930 | 1609 | BBSESASBNHYG | FALSE | TRUE | FALSE | 35.17 |
| P20930 | 1610 | BSESASBNHYGS | FALSE | TRUE | FALSE | 23.78 |
| P20930 | 1612 | ESASBNHYGSAB | FALSE | TRUE | FALSE | 21.27 |
| P20930 | 1613 | SASBNHYGSABE | FALSE | TRUE | FALSE | 58.18 |
| P20930 | 1614 | ASBNHYGSABEQ | FALSE | TRUE | FALSE | 60.78 |

|        |      |               |       |      |       |       |
|--------|------|---------------|-------|------|-------|-------|
| P20930 | 1615 | SBNHYGSABEQS  | FALSE | TRUE | FALSE | 49.08 |
| P20930 | 1616 | BNHYGSABEQSB  | FALSE | TRUE | FALSE | 44.74 |
| P20930 | 1617 | NHYGSABEQSBH  | FALSE | TRUE | FALSE | 32.15 |
| P20930 | 1618 | HYGSABEQSBHG  | FALSE | TRUE | FALSE | 41.45 |
| P20930 | 1619 | YGSABEQSBHGS  | FALSE | TRUE | FALSE | 53.05 |
| P20930 | 1620 | GSABEQSBHGSB  | FALSE | TRUE | FALSE | 57.53 |
| P20930 | 1621 | SABEQSBHGSDN  | FALSE | TRUE | FALSE | 66.01 |
| P20930 | 1622 | ABEQSBHGSDNP  | FALSE | TRUE | FALSE | 65.83 |
| P20930 | 1623 | BEQSBHGSDNPS  | FALSE | TRUE | FALSE | 59.17 |
| P20930 | 1624 | EQSBHGSDNPSB  | FALSE | TRUE | FALSE | 30.9  |
| P20930 | 1625 | QSBHGSDNPSBS  | FALSE | TRUE | FALSE | 26.76 |
| P20930 | 1626 | SBHGSDNPSBSH  | FALSE | TRUE | FALSE | 21.81 |
| P20930 | 1627 | BHGSDNPSBSHQ  | FALSE | TRUE | FALSE | 23.59 |
| P20930 | 1628 | HGSDNPSBSHQE  | FALSE | TRUE | FALSE | 12.08 |
| P20930 | 1629 | GSDNPSBSHQED  | FALSE | TRUE | FALSE | 12.2  |
| P20930 | 1631 | BNPSBSHQEDBAS | FALSE | TRUE | FALSE | 10.46 |
| P20930 | 1634 | BSHQEDBASHGH  | FALSE | TRUE | FALSE | 11.09 |
| P20930 | 1640 | BASHGSAESSB   | FALSE | TRUE | FALSE | 13.12 |
| P20930 | 1641 | ASHGSAESSBQ   | FALSE | TRUE | FALSE | 12.86 |
| P20930 | 1642 | SHGSAESSBQS   | FALSE | TRUE | FALSE | 13.16 |
| P20930 | 1643 | HGSAESSBQSG   | FALSE | TRUE | FALSE | 11.72 |
| P20930 | 1644 | GSAESSBQSGT   | FALSE | TRUE | FALSE | 12.09 |
| P20930 | 1645 | HSAESSBQSGTB  | FALSE | TRUE | FALSE | 23.43 |
| P20930 | 1646 | SAESSBQSGTBH  | FALSE | TRUE | FALSE | 30.32 |
| P20930 | 1647 | AESSBQSGTBHA  | FALSE | TRUE | FALSE | 30.34 |
| P20930 | 1648 | ESSBQSGTBHAE  | FALSE | TRUE | FALSE | 24.67 |
| P20930 | 1649 | SSBQSGTBHAET  | FALSE | TRUE | FALSE | 57.08 |
| P20930 | 1650 | SBQSGTBHAETS  | FALSE | TRUE | FALSE | 50.04 |
| P20930 | 1651 | BQSGTBHAETSS  | FALSE | TRUE | FALSE | 38.31 |
| P20930 | 1652 | QSGTBHAETSSG  | FALSE | TRUE | FALSE | 17.74 |
| P20930 | 1654 | GTBHAETSSGGQ  | FALSE | TRUE | FALSE | 13.86 |
| P20930 | 1671 | EQABSSPGEHBG  | FALSE | TRUE | FALSE | 11.26 |
| P20930 | 1672 | QABSSPGEHBGS  | FALSE | TRUE | FALSE | 24.28 |
| P20930 | 1673 | ABSSPGEHBGSB  | FALSE | TRUE | FALSE | 35.51 |
| P20930 | 1674 | BSSPGEHBGSBH  | FALSE | TRUE | FALSE | 34.23 |
| P20930 | 1675 | SSPGEHBGSBHQ  | FALSE | TRUE | FALSE | 27.44 |
| P20930 | 1676 | SPGEHBGSBHQQ  | FALSE | TRUE | FALSE | 22.7  |
| P20930 | 1677 | PGEHBGSBHQQS  | FALSE | TRUE | FALSE | 18.56 |
| P20930 | 1678 | GEBHGSBHQQSA  | FALSE | TRUE | FALSE | 26.94 |
| P20930 | 1679 | EBHGSBHQQSAD  | FALSE | TRUE | FALSE | 27.56 |
| P20930 | 1680 | BHGSBHQQSADS  | FALSE | TRUE | FALSE | 29.89 |
| P20930 | 1681 | HGSBHQQSADSS  | FALSE | TRUE | FALSE | 18.47 |
| P20930 | 1682 | GSBHQQSADSST  | FALSE | TRUE | FALSE | 17.35 |
| P20930 | 1683 | SBHQQSADSSTD  | FALSE | TRUE | FALSE | 14.04 |
| P20930 | 1690 | DSSTDSGTGBBQ  | FALSE | TRUE | FALSE | 12.64 |
| P20930 | 1692 | STDSGTGBBQDS  | FALSE | TRUE | FALSE | 12.22 |
| P20930 | 1693 | TDSGTGBBQDSS  | FALSE | TRUE | FALSE | 15.76 |
| P20930 | 1694 | DSGTGBBQDSSV  | FALSE | TRUE | FALSE | 17.58 |
| P20930 | 1695 | SGTGBBQDSSVV  | FALSE | TRUE | FALSE | 36.11 |
| P20930 | 1696 | GTGBBQDSSVVG  | FALSE | TRUE | FALSE | 35.05 |
| P20930 | 1697 | TGBBQDSSVVG   | FALSE | TRUE | FALSE | 31.49 |
| P20930 | 1698 | GGBBQDSSVVG   | FALSE | TRUE | FALSE | 29.35 |

|        |      |              |       |      |       |       |
|--------|------|--------------|-------|------|-------|-------|
| P20930 | 1699 | BBQDSSVVGDSG | FALSE | TRUE | FALSE | 20.53 |
| P20930 | 1703 | SSVVGDSGNBGS | FALSE | TRUE | FALSE | 12.18 |
| P20930 | 1704 | SVVGDSGNBGSS | FALSE | TRUE | FALSE | 15.7  |
| P20930 | 1705 | VVGDSGNBGSSG | FALSE | TRUE | FALSE | 16.7  |
| P20930 | 1706 | VGDSGNBGSSGS | FALSE | TRUE | FALSE | 18.58 |
| P20930 | 1707 | GDSGNBGSSGSQ | FALSE | TRUE | FALSE | 17.74 |
| P20930 | 1709 | SGNBGSSGSQAS | FALSE | TRUE | FALSE | 13.16 |
| P20930 | 1710 | GNBGSSGSQASD | FALSE | TRUE | FALSE | 17.16 |
| P20930 | 1711 | NBGSSGSQASDS | FALSE | TRUE | FALSE | 13.21 |
| P20930 | 1741 | GPHQQSHQESTB | FALSE | TRUE | FALSE | 10.2  |
| P20930 | 1743 | HQQSHQESTBGQ | FALSE | TRUE | FALSE | 16.42 |
| P20930 | 1744 | QQSHQESTBGQS | FALSE | TRUE | FALSE | 19.79 |
| P20930 | 1745 | QSHQESTBGQSG | FALSE | TRUE | FALSE | 16.85 |
| P20930 | 1746 | SHQESTBGQSGE | FALSE | TRUE | FALSE | 13.95 |
| P20930 | 1747 | HQESTBGQSGEB | FALSE | TRUE | FALSE | 21.63 |
| P20930 | 1748 | QESTBGQSGEBS | FALSE | TRUE | FALSE | 25.54 |
| P20930 | 1749 | ESTBGQSGEBSG | FALSE | TRUE | FALSE | 21.9  |
| P20930 | 1750 | STBGQSGEBSGB | FALSE | TRUE | FALSE | 31.96 |
| P20930 | 1751 | TBGQSGEBSGBS | FALSE | TRUE | FALSE | 31.93 |
| P20930 | 1752 | BGQSGEBSGBSG | FALSE | TRUE | FALSE | 24.46 |
| P20930 | 1753 | GQSGEBSGBSGS | FALSE | TRUE | FALSE | 13.33 |
| P20930 | 1754 | QSGEBSGBSGSF | FALSE | TRUE | FALSE | 18.75 |
| P20930 | 1755 | SGEBSGBSGSFL | FALSE | TRUE | FALSE | 25.31 |
| P20930 | 1756 | GEBSGBSGSFLY | FALSE | TRUE | FALSE | 18.63 |
| P20930 | 1757 | EBSGBSGSFLYQ | FALSE | TRUE | FALSE | 20.11 |
| P20930 | 1774 | QSESAHGBTGPS | FALSE | TRUE | FALSE | 11.67 |
| P20930 | 1775 | SESAHGBTGPST | FALSE | TRUE | FALSE | 10.84 |
| P20930 | 1777 | SAHGBTGPSTGG | FALSE | TRUE | FALSE | 12.7  |
| P20930 | 1778 | AHGBTGPSTGGB | FALSE | TRUE | FALSE | 20.27 |
| P20930 | 1779 | HGBTGPSTGGBQ | FALSE | TRUE | FALSE | 33.07 |
| P20930 | 1780 | GBTGPSTGGBQB | FALSE | TRUE | FALSE | 31.64 |
| P20930 | 1781 | BTGPSTGGBQBS | FALSE | TRUE | FALSE | 28.51 |
| P20930 | 1782 | TGPSTGGBQBSB | FALSE | TRUE | FALSE | 28.18 |
| P20930 | 1783 | GPSTGGBQBSBH | FALSE | TRUE | FALSE | 25.99 |
| P20930 | 1784 | PSTGGBQBSBHE | FALSE | TRUE | FALSE | 29.42 |
| P20930 | 1785 | STGGBQBSBHEQ | FALSE | TRUE | FALSE | 38.21 |
| P20930 | 1787 | GGBQBSBHEQAB | FALSE | TRUE | FALSE | 28.41 |
| P20930 | 1788 | GBQBSBHEQABD | FALSE | TRUE | FALSE | 33.5  |
| P20930 | 1789 | BQBSBHEQABDS | FALSE | TRUE | FALSE | 41.58 |
| P20930 | 1790 | QBSBHEQABDSS | FALSE | TRUE | FALSE | 39.52 |
| P20930 | 1791 | BSBHEQABDSSB | FALSE | TRUE | FALSE | 36.59 |
| P20930 | 1792 | SBHEQABDSSBH | FALSE | TRUE | FALSE | 26.94 |
| P20930 | 1793 | BHEQABDSSBHS | FALSE | TRUE | FALSE | 24.78 |
| P20930 | 1794 | HEQABDSSBHSA | FALSE | TRUE | FALSE | 14.45 |
| P20930 | 1795 | EQABDSSBHSA  | FALSE | TRUE | FALSE | 10.7  |
| P20930 | 1796 | QABDSSBHSA   | FALSE | TRUE | FALSE | 23.23 |
| P20930 | 1797 | ABDSSBHSA    | FALSE | TRUE | FALSE | 24.13 |
| P20930 | 1798 | BDSSBHSA     | FALSE | TRUE | FALSE | 21.7  |
| P20930 | 1799 | DSSBHSA      | FALSE | TRUE | FALSE | 12.34 |
| P20930 | 1800 | SSBHSA       | FALSE | TRUE | FALSE | 13.93 |
| P20930 | 1801 | SBHSA        | FALSE | TRUE | FALSE | 12.61 |
| P20930 | 1808 | EGQDTIBGHPGS | FALSE | TRUE | FALSE | 13.01 |

|        |      |              |       |      |       |       |
|--------|------|--------------|-------|------|-------|-------|
| P20930 | 1809 | GQDTIBGHPGSS | FALSE | TRUE | FALSE | 18.34 |
| P20930 | 1810 | QDTIBGHPGSSB | FALSE | TRUE | FALSE | 26.41 |
| P20930 | 1811 | DTIBGHPGSSBG | FALSE | TRUE | FALSE | 35.92 |
| P20930 | 1812 | TIBGHPGSSBGG | FALSE | TRUE | FALSE | 20.7  |
| P20930 | 1813 | IBGHPGSSBGGB | FALSE | TRUE | FALSE | 23    |
| P20930 | 1814 | BGHPGSSBGGBQ | FALSE | TRUE | FALSE | 60.88 |
| P20930 | 1815 | GHPGSSBGGBQG | FALSE | TRUE | FALSE | 44.25 |
| P20930 | 1816 | HPGSSBGGBQGS | FALSE | TRUE | FALSE | 67.16 |
| P20930 | 1817 | PGSSBGGBQGSH | FALSE | TRUE | FALSE | 35.37 |
| P20930 | 1818 | GSSBGGBQGSHY | FALSE | TRUE | FALSE | 33.7  |
| P20930 | 1819 | SSBGGBQGSHYE | FALSE | TRUE | FALSE | 66.67 |
| P20930 | 1820 | SBGGBQGSHYEQ | FALSE | TRUE | FALSE | 59.77 |
| P20930 | 1821 | BGGBQGSHYEQS | FALSE | TRUE | FALSE | 60.49 |
| P20930 | 1822 | GGBQGSHYEQSV | FALSE | TRUE | FALSE | 49.47 |
| P20930 | 1823 | GBQGSHYEQSVD | FALSE | TRUE | FALSE | 37.35 |
| P20930 | 1824 | BQGSHYEQSVDS | FALSE | TRUE | FALSE | 11.68 |
| P20930 | 1847 | TSQEBSDVSBGQ | FALSE | TRUE | FALSE | 17.93 |
| P20930 | 1848 | SQEBSDVSBGQS | FALSE | TRUE | FALSE | 19.06 |
| P20930 | 1849 | QEBSDVSBGQSG | FALSE | TRUE | FALSE | 20.18 |
| P20930 | 1850 | EBSDVSBGQSGS | FALSE | TRUE | FALSE | 22.93 |
| P20930 | 1851 | BSDVSBGQSGSB | FALSE | TRUE | FALSE | 34.76 |
| P20930 | 1852 | SDVSBGQSGSBS | FALSE | TRUE | FALSE | 32.18 |
| P20930 | 1853 | DVSBGQSGSBSV | FALSE | TRUE | FALSE | 29.86 |
| P20930 | 1854 | VSBGQSGSBSVS | FALSE | TRUE | FALSE | 41.31 |
| P20930 | 1855 | SBGQSGSBSVSB | FALSE | TRUE | FALSE | 42.23 |
| P20930 | 1856 | BGQSGSBSVSBQ | FALSE | TRUE | FALSE | 63.88 |
| P20930 | 1857 | GQSGSBSVSBQT | FALSE | TRUE | FALSE | 37.96 |
| P20930 | 1858 | QSGSBSVSBQTB | FALSE | TRUE | FALSE | 47.12 |
| P20930 | 1859 | SGSBSVSBQTBN | FALSE | TRUE | FALSE | 49.85 |
| P20930 | 1860 | GSBSVSBQTBNE | FALSE | TRUE | FALSE | 49.99 |
| P20930 | 1861 | SBSVSBQTBNEK | FALSE | TRUE | FALSE | 64.03 |
| P20930 | 1862 | BSVSBQTBNEKQ | FALSE | TRUE | FALSE | 63.4  |
| P20930 | 1863 | SVSBQTBNEKQS | FALSE | TRUE | FALSE | 50.8  |
| P20930 | 1864 | VSBQTBNEKQSG | FALSE | TRUE | FALSE | 46.88 |
| P20930 | 1865 | SBQTBNEKQSGD | FALSE | TRUE | FALSE | 47.1  |
| P20930 | 1866 | BQTBNEKQSGDG | FALSE | TRUE | FALSE | 38.72 |
| P20930 | 1867 | QTBNEKQSGDGS | FALSE | TRUE | FALSE | 16.77 |
| P20930 | 1868 | TBNEKQSGDGSB | FALSE | TRUE | FALSE | 14.97 |
| P20930 | 1869 | BNEKQSGDGSBH | FALSE | TRUE | FALSE | 17.58 |
| P20930 | 1870 | NEKQSGDGSBHS | FALSE | TRUE | FALSE | 11.46 |
| P20930 | 1873 | QSGDGSBHSGSB | FALSE | TRUE | FALSE | 29.17 |
| P20930 | 1874 | SGDGSBHSGSBH | FALSE | TRUE | FALSE | 23.67 |
| P20930 | 1875 | GDGSBHSGSBHH | FALSE | TRUE | FALSE | 16.38 |
| P20930 | 1876 | DGSBHSGSBHHE | FALSE | TRUE | FALSE | 21.27 |
| P20930 | 1877 | GSBHSGSBHHEA | FALSE | TRUE | FALSE | 17.32 |
| P20930 | 1878 | SBHSGSBHHEAS | FALSE | TRUE | FALSE | 19.24 |
| P20930 | 1879 | BHSGSBHHEASS | FALSE | TRUE | FALSE | 21.43 |
| P20930 | 1880 | HSGSBHHEASSB | FALSE | TRUE | FALSE | 27.25 |
| P20930 | 1881 | GSBHHEASSBA  | FALSE | TRUE | FALSE | 19.79 |
| P20930 | 1882 | GSBHHEASSBAD | FALSE | TRUE | FALSE | 15.62 |
| P20930 | 1883 | SBHHEASSBADS | FALSE | TRUE | FALSE | 15.37 |
| P20930 | 1884 | BHHEASSBADSS | FALSE | TRUE | FALSE | 12.94 |



|        |      |              |       |      |       |       |
|--------|------|--------------|-------|------|-------|-------|
| P20930 | 1885 | HHEASSBADSSB | FALSE | TRUE | FALSE | 10.61 |
| P20930 | 1886 | HEASSBADSSBH | FALSE | TRUE | FALSE | 12.87 |
| P20930 | 1887 | EASSBADSSBHS | FALSE | TRUE | FALSE | 17.58 |
| P20930 | 1888 | ASSBADSSBHSQ | FALSE | TRUE | FALSE | 25.58 |
| P20930 | 1889 | SSBADSSBHSQV | FALSE | TRUE | FALSE | 25.87 |
| P20930 | 1890 | SBADSSBHSQVG | FALSE | TRUE | FALSE | 30.7  |
| P20930 | 1891 | BADSSBHSQVGQ | FALSE | TRUE | FALSE | 28.07 |
| P20930 | 1892 | ADSSBHSQVGQG | FALSE | TRUE | FALSE | 11.54 |
| P20930 | 1893 | DSSBHSQVGQGQ | FALSE | TRUE | FALSE | 18.91 |
| P20930 | 1894 | SSBHSQVGQGQS | FALSE | TRUE | FALSE | 20.88 |
| P20930 | 1895 | SBHSQVGQGQSS | FALSE | TRUE | FALSE | 16.58 |
| P20930 | 1901 | GQGQSSGPBTB  | FALSE | TRUE | FALSE | 15.23 |
| P20930 | 1902 | QGQSSGPBTB   | FALSE | TRUE | FALSE | 27.74 |
| P20930 | 1903 | GQSSGPBTB    | FALSE | TRUE | FALSE | 38.48 |
| P20930 | 1904 | QSSGPBTB     | FALSE | TRUE | FALSE | 29.18 |
| P20930 | 1905 | SSGPBTB      | FALSE | TRUE | FALSE | 32.99 |
| P20930 | 1906 | SGPBTB       | FALSE | TRUE | FALSE | 36.45 |
| P20930 | 1907 | GPBTB        | FALSE | TRUE | FALSE | 30.61 |
| P20930 | 1908 | PBTB         | FALSE | TRUE | FALSE | 27.82 |
| P20930 | 1909 | BTB          | FALSE | TRUE | FALSE | 36.34 |
| P20930 | 1910 | TSB          | FALSE | TRUE | FALSE | 14.41 |
| P20930 | 1929 | EDSEBWGSASB  | FALSE | TRUE | FALSE | 12.59 |
| P20930 | 1930 | DSEBWGSASBN  | FALSE | TRUE | FALSE | 19.47 |
| P20930 | 1931 | SEBWGSASBNH  | FALSE | TRUE | FALSE | 19.19 |
| P20930 | 1932 | EBWGSASBNHL  | FALSE | TRUE | FALSE | 19.18 |
| P20930 | 1933 | BWGSASBNHLG  | FALSE | TRUE | FALSE | 19.34 |
| P20930 | 1934 | WGSASBNHLGS  | FALSE | TRUE | FALSE | 14.87 |
| P20930 | 1935 | SGSASBNHLGSA | FALSE | TRUE | FALSE | 10.15 |
| P20930 | 1936 | GSASBNHLGSAW | FALSE | TRUE | FALSE | 12.68 |
| P20930 | 1937 | SASBNHLGSAWE | FALSE | TRUE | FALSE | 32.09 |
| P20930 | 1938 | ASBNHLGSAWEQ | FALSE | TRUE | FALSE | 21.9  |
| P20930 | 1939 | SBNHLGSAWEQS | FALSE | TRUE | FALSE | 17.04 |
| P20930 | 1940 | BNHLGSAWEQSB | FALSE | TRUE | FALSE | 14.32 |
| P20930 | 1944 | GSAWEQSB     | FALSE | TRUE | FALSE | 13.34 |
| P20930 | 1945 | SAWEQSB      | FALSE | TRUE | FALSE | 19.55 |
| P20930 | 1946 | AWEQSB       | FALSE | TRUE | FALSE | 18.5  |
| P20930 | 1947 | WEQSB        | FALSE | TRUE | FALSE | 20.91 |
| P20930 | 1948 | EQSB         | FALSE | TRUE | FALSE | 21.9  |
| P20930 | 1949 | QSB          | FALSE | TRUE | FALSE | 38.76 |
| P20930 | 1950 | SBD          | FALSE | TRUE | FALSE | 30.87 |
| P20930 | 1951 | BD           | FALSE | TRUE | FALSE | 23.89 |
| P20930 | 1952 | DG           | FALSE | TRUE | FALSE | 12.32 |
| P20930 | 1953 | GS           | FALSE | TRUE | FALSE | 12.93 |
| P20930 | 1955 | BHP          | FALSE | TRUE | FALSE | 10.93 |
| P20930 | 1961 | HED          | FALSE | TRUE | FALSE | 12.67 |
| P20930 | 1964 | BAG          | FALSE | TRUE | FALSE | 10.74 |
| P20930 | 1967 | HG           | FALSE | TRUE | FALSE | 10.43 |
| P20930 | 1968 | GHS          | FALSE | TRUE | FALSE | 10.21 |
| P20930 | 1969 | HS           | FALSE | TRUE | FALSE | 21.28 |
| P20930 | 1970 | SAD          | FALSE | TRUE | FALSE | 24.83 |
| P20930 | 1971 | AD           | FALSE | TRUE | FALSE | 36.24 |
| P20930 | 1972 | DSS          | FALSE | TRUE | FALSE | 44.47 |

|        |      |              |       |      |       |       |
|--------|------|--------------|-------|------|-------|-------|
| P20930 | 1973 | SSBQSGTBHTES | FALSE | TRUE | FALSE | 67.37 |
| P20930 | 1974 | SBQSGTBHTESS | FALSE | TRUE | FALSE | 73.24 |
| P20930 | 1975 | BQSGTBHTESSS | FALSE | TRUE | FALSE | 47.18 |
| P20930 | 1976 | QSGTBHTESSSB | FALSE | TRUE | FALSE | 35.44 |
| P20930 | 1977 | SGTBHTESSSBG | FALSE | TRUE | FALSE | 36.18 |
| P20930 | 1978 | GTBHTESSSBGQ | FALSE | TRUE | FALSE | 44.58 |
| P20930 | 1979 | TBHTESSSBGQA | FALSE | TRUE | FALSE | 10.73 |
| P20930 | 1982 | TESSSBGQAASS | FALSE | TRUE | FALSE | 23.05 |
| P20930 | 1983 | ESSSBGQAASSH | FALSE | TRUE | FALSE | 18.61 |
| P20930 | 1984 | SSSBGQAASSHE | FALSE | TRUE | FALSE | 23.5  |
| P20930 | 1985 | SSBGQAASSHEQ | FALSE | TRUE | FALSE | 37.54 |
| P20930 | 1987 | BGQAASSHEQAB | FALSE | TRUE | FALSE | 17.87 |
| P20930 | 1994 | HEQABSSAGEBH | FALSE | TRUE | FALSE | 13.69 |
| P20930 | 1995 | EQABSSAGEBHG | FALSE | TRUE | FALSE | 15.63 |
| P20930 | 1996 | QABSSAGEBHGS | FALSE | TRUE | FALSE | 26.96 |
| P20930 | 1997 | ABSSAGEBHGSH | FALSE | TRUE | FALSE | 25.31 |
| P20930 | 1998 | BSSAGEBHGSHH | FALSE | TRUE | FALSE | 19.42 |
| P20930 | 1999 | SSAGEBHGSHHQ | FALSE | TRUE | FALSE | 19.1  |
| P20930 | 2000 | SAGEBHGSHHQL | FALSE | TRUE | FALSE | 21.02 |
| P20930 | 2001 | AGEBHGSHHQLQ | FALSE | TRUE | FALSE | 21.76 |
| P20930 | 2002 | GEBHGSHHQLQS | FALSE | TRUE | FALSE | 24.5  |
| P20930 | 2004 | BHGSHHQLQSAD | FALSE | TRUE | FALSE | 12.09 |
| P20930 | 2011 | LQSADSSBHSGI | FALSE | TRUE | FALSE | 10.5  |
| P20930 | 2026 | QASSAVBDSGHB | FALSE | TRUE | FALSE | 13.54 |
| P20930 | 2027 | ASSAVBDSGHBG | FALSE | TRUE | FALSE | 19.79 |
| P20930 | 2028 | SSAVBDSGHBGY | FALSE | TRUE | FALSE | 29.37 |
| P20930 | 2029 | SAVBDSGHBGYS | FALSE | TRUE | FALSE | 29.07 |
| P20930 | 2030 | AVBDSGHBGYSG | FALSE | TRUE | FALSE | 26.75 |
| P20930 | 2031 | VBDSGHBGYSGS | FALSE | TRUE | FALSE | 20.72 |
| P20930 | 2032 | BDSGHBGYSGSQ | FALSE | TRUE | FALSE | 15.25 |
| P20930 | 2035 | GHBGYSGSQASD | FALSE | TRUE | FALSE | 12.11 |
| P20930 | 2036 | HBGYSGSQASDS | FALSE | TRUE | FALSE | 14.38 |
| P20930 | 2068 | HQQSHKESABGQ | FALSE | TRUE | FALSE | 18.2  |
| P20930 | 2069 | QQSHKESABGQS | FALSE | TRUE | FALSE | 24.76 |
| P20930 | 2070 | QSHKESABGQSG | FALSE | TRUE | FALSE | 17.03 |
| P20930 | 2071 | SHKESABGQSGE | FALSE | TRUE | FALSE | 14.27 |
| P20930 | 2072 | HKESABGQSGES | FALSE | TRUE | FALSE | 15.22 |
| P20930 | 2073 | KESABGQSGESS | FALSE | TRUE | FALSE | 18.38 |
| P20930 | 2074 | ESABGQSGESSG | FALSE | TRUE | FALSE | 16.25 |
| P20930 | 2075 | SABGQSGESSGB | FALSE | TRUE | FALSE | 33.92 |
| P20930 | 2076 | ABGQSGESSGBS | FALSE | TRUE | FALSE | 30.29 |
| P20930 | 2077 | BGQSGESSGBSG | FALSE | TRUE | FALSE | 18.62 |
| P20930 | 2080 | SGESSGBSGSFL | FALSE | TRUE | FALSE | 15.32 |
| P20930 | 2081 | GESSGBSGSFLY | FALSE | TRUE | FALSE | 10.38 |
| P20930 | 2082 | ESSGBSGSFLYQ | FALSE | TRUE | FALSE | 15.33 |
| P20930 | 2104 | HGQSAPSTGGBQ | FALSE | TRUE | FALSE | 11.71 |
| P20930 | 2105 | GQSAPSTGGBQG | FALSE | TRUE | FALSE | 13.16 |
| P20930 | 2106 | QSAPSTGGBQGS | FALSE | TRUE | FALSE | 19.33 |
| P20930 | 2107 | SAPSTGGBQGSH | FALSE | TRUE | FALSE | 14.55 |
| P20930 | 2108 | APSTGGBQGSHY | FALSE | TRUE | FALSE | 17.66 |
| P20930 | 2109 | PSTGGBQGSHYD | FALSE | TRUE | FALSE | 12.61 |
| P20930 | 2110 | STGGBQGSHYDQ | FALSE | TRUE | FALSE | 30.05 |

|        |      |               |       |      |       |       |
|--------|------|---------------|-------|------|-------|-------|
| P20930 | 2112 | GGBQGSHYDQAQ  | FALSE | TRUE | FALSE | 39.48 |
| P20930 | 2113 | GBQGSHYDQAQD  | FALSE | TRUE | FALSE | 29.21 |
| P20930 | 2114 | BQGSHYDQAQDS  | FALSE | TRUE | FALSE | 14.39 |
| P20930 | 2121 | QAQDSSBHSASQ  | FALSE | TRUE | FALSE | 11.96 |
| P20930 | 2122 | AQDSSBHSASQE  | FALSE | TRUE | FALSE | 12.05 |
| P20930 | 2123 | QDSSBHSASQEG  | FALSE | TRUE | FALSE | 12.88 |
| P20930 | 2124 | DSSBHSASQEGQ  | FALSE | TRUE | FALSE | 12.34 |
| P20930 | 2125 | SSBHSASQEGQD  | FALSE | TRUE | FALSE | 13.93 |
| P20930 | 2126 | SBHSASQEGQDT  | FALSE | TRUE | FALSE | 12.61 |
| P20930 | 2133 | EGQDTIBGHPP   | FALSE | TRUE | FALSE | 10.34 |
| P20930 | 2134 | GQDTIBGHPPGPS | FALSE | TRUE | FALSE | 14.47 |
| P20930 | 2135 | QDTIBGHPPGPSB | FALSE | TRUE | FALSE | 22.61 |
| P20930 | 2136 | DTIBGHPPGPSBG | FALSE | TRUE | FALSE | 24.61 |
| P20930 | 2137 | TIBGHPPGPSBGG | FALSE | TRUE | FALSE | 15.09 |
| P20930 | 2138 | IBGHPPGPSBGGB | FALSE | TRUE | FALSE | 17.25 |
| P20930 | 2139 | BGHPPGPSBGGBQ | FALSE | TRUE | FALSE | 44.17 |
| P20930 | 2140 | GHPGPSBGGBQCG | FALSE | TRUE | FALSE | 34.32 |
| P20930 | 2141 | HPGPSBGGBQGS  | FALSE | TRUE | FALSE | 49.31 |
| P20930 | 2142 | PGPSBGGBQGS   | FALSE | TRUE | FALSE | 34.96 |
| P20930 | 2143 | GPSBGGBQGS    | FALSE | TRUE | FALSE | 48.56 |
| P20930 | 2144 | PSBGGBQGS     | FALSE | TRUE | FALSE | 45.82 |
| P20930 | 2145 | SBGGBQGS      | FALSE | TRUE | FALSE | 64.56 |
| P20930 | 2146 | BGGBQGS       | FALSE | TRUE | FALSE | 52.32 |
| P20930 | 2147 | GGBQGS        | FALSE | TRUE | FALSE | 40.96 |
| P20930 | 2148 | GBQGS         | FALSE | TRUE | FALSE | 29    |
| P20930 | 2170 | HTTSQGBSDASB  | FALSE | TRUE | FALSE | 14.85 |
| P20930 | 2171 | TTSQGBSDASBG  | FALSE | TRUE | FALSE | 23.27 |
| P20930 | 2172 | TSQGBSDASBGQ  | FALSE | TRUE | FALSE | 33.06 |
| P20930 | 2173 | SQGBSDASBGQS  | FALSE | TRUE | FALSE | 30.94 |
| P20930 | 2174 | QGBSDASBGQSG  | FALSE | TRUE | FALSE | 37.33 |
| P20930 | 2175 | GBSDASBGQSGS  | FALSE | TRUE | FALSE | 36.13 |
| P20930 | 2176 | BSDASBGQSGSB  | FALSE | TRUE | FALSE | 35.8  |
| P20930 | 2177 | SDASBGQSGSBS  | FALSE | TRUE | FALSE | 25.54 |
| P20930 | 2178 | DASBGQSGSBSA  | FALSE | TRUE | FALSE | 25.83 |
| P20930 | 2179 | ASBGQSGSBSAS  | FALSE | TRUE | FALSE | 26.8  |
| P20930 | 2180 | SBGQSGSBSASB  | FALSE | TRUE | FALSE | 38.88 |
| P20930 | 2181 | BGQSGSBSASBK  | FALSE | TRUE | FALSE | 18.33 |
| P20930 | 2183 | QSGSBSASBKTY  | FALSE | TRUE | FALSE | 25.19 |
| P20930 | 2184 | SGSBSASBKTYD  | FALSE | TRUE | FALSE | 49.32 |
| P20930 | 2185 | GSBSASBKTYDK  | FALSE | TRUE | FALSE | 12.3  |
| P20930 | 2186 | SBSASBKTYDKE  | FALSE | TRUE | FALSE | 57.04 |
| P20930 | 2187 | BSASBKTYDKEQ  | FALSE | TRUE | FALSE | 32.24 |
| P20930 | 2188 | SASBKTYDKEQS  | FALSE | TRUE | FALSE | 17.54 |
| P20930 | 2190 | SBKTYDKEQSGD  | FALSE | TRUE | FALSE | 13.63 |
| P20930 | 2196 | KEQSGDGSBHSG  | FALSE | TRUE | FALSE | 12.69 |
| P20930 | 2197 | EQSGDGSBHSGS  | FALSE | TRUE | FALSE | 11.05 |
| P20930 | 2198 | QSGDGSBHSGSH  | FALSE | TRUE | FALSE | 13.45 |
| P20930 | 2199 | SGDGSBHSGSHH  | FALSE | TRUE | FALSE | 13.75 |
| P20930 | 2200 | GDGSBHSGSHHH  | FALSE | TRUE | FALSE | 13.96 |
| P20930 | 2201 | DGSBHSGSHHHE  | FALSE | TRUE | FALSE | 15.91 |
| P20930 | 2202 | GSBHSGSHHHEA  | FALSE | TRUE | FALSE | 10.45 |
| P20930 | 2203 | SBHSGSHHHEAS  | FALSE | TRUE | FALSE | 10.34 |

|        |      |              |       |      |       |       |
|--------|------|--------------|-------|------|-------|-------|
| P20930 | 2213 | ASSWADSSBHSL | FALSE | TRUE | FALSE | 13.65 |
| P20930 | 2214 | SSWADSSBHSLV | FALSE | TRUE | FALSE | 11.84 |
| P20930 | 2215 | SWADSSBHSLVG | FALSE | TRUE | FALSE | 13.27 |
| P20930 | 2216 | WADSSBHSLVGQ | FALSE | TRUE | FALSE | 15.87 |
| P20930 | 2217 | ADSSBHSLVGQG | FALSE | TRUE | FALSE | 13.67 |
| P20930 | 2218 | DSSBHSLVGQQG | FALSE | TRUE | FALSE | 16.84 |
| P20930 | 2219 | SSBHSLVGQQQS | FALSE | TRUE | FALSE | 19.26 |
| P20930 | 2220 | SBHSLVGQQQSS | FALSE | TRUE | FALSE | 13.04 |
| P20930 | 2226 | GQQQSSGPBTBS | FALSE | TRUE | FALSE | 15.23 |
| P20930 | 2227 | QQQSSGPBTBSP | FALSE | TRUE | FALSE | 10.69 |
| P20930 | 2228 | GQSSGPBTBSPB | FALSE | TRUE | FALSE | 14.35 |
| P20930 | 2229 | QSSGPBTBSPBG | FALSE | TRUE | FALSE | 16.02 |
| P20930 | 2230 | SSGPBTBSPBGS | FALSE | TRUE | FALSE | 29.51 |
| P20930 | 2231 | SGPBTBSPBGSS | FALSE | TRUE | FALSE | 32.07 |
| P20930 | 2232 | GPBTBSPBGSSV | FALSE | TRUE | FALSE | 34.69 |
| P20930 | 2233 | PBTBSPBGSSVS | FALSE | TRUE | FALSE | 25.6  |
| P20930 | 2234 | BTSBPBGSSVSQ | FALSE | TRUE | FALSE | 40.53 |
| P20930 | 2235 | TSBPBGSSVSQD | FALSE | TRUE | FALSE | 24.84 |
| P20930 | 2236 | SBPBGSVSQDS  | FALSE | TRUE | FALSE | 20.56 |
| P20930 | 2237 | BPBGSVSQDSD  | FALSE | TRUE | FALSE | 19.47 |
| P20930 | 2238 | PBGSSVSQDSDS | FALSE | TRUE | FALSE | 17.86 |
| P20930 | 2253 | SEDEBBSGSAS  | FALSE | TRUE | FALSE | 11.42 |
| P20930 | 2254 | EDSEBBSGSASB | FALSE | TRUE | FALSE | 16.73 |
| P20930 | 2255 | DSEBBSGSASBN | FALSE | TRUE | FALSE | 27.57 |
| P20930 | 2256 | SEBBSGSASBNH | FALSE | TRUE | FALSE | 36.95 |
| P20930 | 2257 | EBBSGSASBNHH | FALSE | TRUE | FALSE | 30.1  |
| P20930 | 2258 | BBSGSASBNHHG | FALSE | TRUE | FALSE | 16.38 |
| P20930 | 2259 | BSGSASBNHHGS | FALSE | TRUE | FALSE | 11.13 |
| P20930 | 2262 | SASBNHHGSAQE | FALSE | TRUE | FALSE | 10.14 |
| P20930 | 2263 | ASBNHHGSAQEQ | FALSE | TRUE | FALSE | 10.26 |
| P20930 | 2265 | BNHHGSAQEQSB | FALSE | TRUE | FALSE | 11.41 |
| P20930 | 2270 | SAQEQSBDGSBH | FALSE | TRUE | FALSE | 18.22 |
| P20930 | 2271 | AQEQSBDGSBHP | FALSE | TRUE | FALSE | 14.7  |
| P20930 | 2272 | QEQSBDGSBHPB | FALSE | TRUE | FALSE | 29.35 |
| P20930 | 2273 | EQSBDGSBHPBS | FALSE | TRUE | FALSE | 25.61 |
| P20930 | 2274 | QSBDGSBHPBSH | FALSE | TRUE | FALSE | 38.61 |
| P20930 | 2275 | SBDGSBHPBSHH | FALSE | TRUE | FALSE | 32.2  |
| P20930 | 2276 | BDGSBHPBSHHE | FALSE | TRUE | FALSE | 29.01 |
| P20930 | 2277 | DGSBHPBSHHED | FALSE | TRUE | FALSE | 21.92 |
| P20930 | 2278 | GSBHPBSHHEDB | FALSE | TRUE | FALSE | 20.31 |
| P20930 | 2279 | SBHPBSHHEDBA | FALSE | TRUE | FALSE | 13.17 |
| P20930 | 2280 | BHPBSHHEDBAG | FALSE | TRUE | FALSE | 18.49 |
| P20930 | 2281 | HPBSHHEDBAGH | FALSE | TRUE | FALSE | 18.25 |
| P20930 | 2282 | PBSHHEDBAGHG | FALSE | TRUE | FALSE | 10.03 |
| P20930 | 2283 | BSHHEDBAGHGH | FALSE | TRUE | FALSE | 15.1  |
| P20930 | 2286 | HEDBAGHGHSAE | FALSE | TRUE | FALSE | 11.95 |
| P20930 | 2289 | BAGHGHSAESSB | FALSE | TRUE | FALSE | 14.79 |
| P20930 | 2290 | AGHGHSAESSBQ | FALSE | TRUE | FALSE | 12.62 |
| P20930 | 2291 | GHGHSAESSBQS | FALSE | TRUE | FALSE | 11.57 |
| P20930 | 2292 | HGHSAESSBQSG | FALSE | TRUE | FALSE | 11.72 |
| P20930 | 2293 | GHSAESSBQSGT | FALSE | TRUE | FALSE | 12.09 |
| P20930 | 2294 | HSAESSBQSGTH | FALSE | TRUE | FALSE | 14.09 |

|        |      |               |       |      |       |       |
|--------|------|---------------|-------|------|-------|-------|
| P20930 | 2295 | SAESSBQSGTHH  | FALSE | TRUE | FALSE | 15.91 |
| P20930 | 2296 | AESSBQSGTHHA  | FALSE | TRUE | FALSE | 13.75 |
| P20930 | 2297 | ESSBQSGTHHAE  | FALSE | TRUE | FALSE | 11.15 |
| P20930 | 2298 | SSBQSGTHHAEN  | FALSE | TRUE | FALSE | 28.86 |
| P20930 | 2299 | SBQSGTHHAENS  | FALSE | TRUE | FALSE | 27.73 |
| P20930 | 2319 | HEQABSSAGEBH  | FALSE | TRUE | FALSE | 13.69 |
| P20930 | 2320 | EQABSSAGEBHG  | FALSE | TRUE | FALSE | 15.63 |
| P20930 | 2321 | QABSSAGEBHGS  | FALSE | TRUE | FALSE | 26.96 |
| P20930 | 2322 | ABSSAGEBHGSH  | FALSE | TRUE | FALSE | 25.31 |
| P20930 | 2323 | BSSAGEBHGS HH | FALSE | TRUE | FALSE | 19.42 |
| P20930 | 2324 | SSAGEBHGS HHQ | FALSE | TRUE | FALSE | 19.1  |
| P20930 | 2325 | SAGEBHGS HHQQ | FALSE | TRUE | FALSE | 21.23 |
| P20930 | 2326 | AGEBHGS HHQQS | FALSE | TRUE | FALSE | 23.85 |
| P20930 | 2327 | GEBHGS HHQQSA | FALSE | TRUE | FALSE | 21.02 |
| P20930 | 2328 | EBHGS HHQQSAD | FALSE | TRUE | FALSE | 13.81 |
| P20930 | 2329 | BHGS HHQQSADS | FALSE | TRUE | FALSE | 12.18 |
| P20930 | 2334 | HQQSADSSB HSG | FALSE | TRUE | FALSE | 10.27 |
| P20930 | 2350 | QASSAVBDSGHB  | FALSE | TRUE | FALSE | 13.54 |
| P20930 | 2351 | ASSAVBDSGHBG  | FALSE | TRUE | FALSE | 19.79 |
| P20930 | 2352 | SSAVBDSGHBGS  | FALSE | TRUE | FALSE | 33.54 |
| P20930 | 2353 | SAVBDSGHBGSS  | FALSE | TRUE | FALSE | 35.46 |
| P20930 | 2354 | AVBDSGHBGSSG  | FALSE | TRUE | FALSE | 30.96 |
| P20930 | 2355 | VBDSGHBGSSGS  | FALSE | TRUE | FALSE | 33.38 |
| P20930 | 2356 | BDSGHBGSSGSQ  | FALSE | TRUE | FALSE | 28.93 |
| P20930 | 2358 | SGHBGSSGSQAS  | FALSE | TRUE | FALSE | 11.9  |
| P20930 | 2359 | GHBGSSGSQASD  | FALSE | TRUE | FALSE | 12.85 |
| P20930 | 2360 | HBGSSGSQASDS  | FALSE | TRUE | FALSE | 14.88 |
| P20930 | 2390 | GPHQQSHQESTB  | FALSE | TRUE | FALSE | 10.2  |
| P20930 | 2392 | HQQSHQESTBGB  | FALSE | TRUE | FALSE | 16.88 |
| P20930 | 2393 | QQSHQESTBGBS  | FALSE | TRUE | FALSE | 24.3  |
| P20930 | 2394 | QSHQESTBGBSA  | FALSE | TRUE | FALSE | 22.69 |
| P20930 | 2395 | SHQESTBGBSAG  | FALSE | TRUE | FALSE | 22.27 |
| P20930 | 2396 | HQESTBGBSAGB  | FALSE | TRUE | FALSE | 19.25 |
| P20930 | 2397 | QESTBGBSAGBS  | FALSE | TRUE | FALSE | 32.94 |
| P20930 | 2398 | ESTBGBSAGBSG  | FALSE | TRUE | FALSE | 31.83 |
| P20930 | 2399 | STBGBSAGBSGB  | FALSE | TRUE | FALSE | 30.27 |
| P20930 | 2400 | TBGBSAGBSGBS  | FALSE | TRUE | FALSE | 49.45 |
| P20930 | 2401 | BGBSAGBSGBSG  | FALSE | TRUE | FALSE | 39.54 |
| P20930 | 2402 | GBSAGBSGBSGS  | FALSE | TRUE | FALSE | 37.84 |
| P20930 | 2403 | BSAGBSGBSGSF  | FALSE | TRUE | FALSE | 44.05 |
| P20930 | 2404 | SAGBSGBSGSFL  | FALSE | TRUE | FALSE | 31.53 |
| P20930 | 2405 | AGBSGBSGSFLY  | FALSE | TRUE | FALSE | 16.09 |
| P20930 | 2406 | GBSGBSGSFLYQ  | FALSE | TRUE | FALSE | 18.51 |
| P20930 | 2424 | SESAHGBTGTST  | FALSE | TRUE | FALSE | 11.89 |
| P20930 | 2425 | ESAHGBTGTSTG  | FALSE | TRUE | FALSE | 11.11 |
| P20930 | 2426 | SAHGBTGTSTGG  | FALSE | TRUE | FALSE | 12.89 |
| P20930 | 2427 | AHGBTGTSTGGB  | FALSE | TRUE | FALSE | 20.66 |
| P20930 | 2428 | HGBTGTSTGGBQ  | FALSE | TRUE | FALSE | 29.97 |
| P20930 | 2429 | GBTGTSTGGBQG  | FALSE | TRUE | FALSE | 20.45 |
| P20930 | 2430 | BTGTSTGGBQGS  | FALSE | TRUE | FALSE | 31.28 |
| P20930 | 2431 | TGTSTGGBQGSH  | FALSE | TRUE | FALSE | 15.17 |
| P20930 | 2432 | GTSTGGBQGSHH  | FALSE | TRUE | FALSE | 17.72 |

|        |      |              |       |      |       |       |
|--------|------|--------------|-------|------|-------|-------|
| P20930 | 2433 | TSTGGBQGSHHK | FALSE | TRUE | FALSE | 11.67 |
| P20930 | 2434 | STGGBQGSHHKQ | FALSE | TRUE | FALSE | 10.71 |
| P20930 | 2437 | GBQGSHHKQABD | FALSE | TRUE | FALSE | 14.38 |
| P20930 | 2438 | BQGSHHKQABDS | FALSE | TRUE | FALSE | 10    |
| P20930 | 2441 | SHHKQABDSSBH | FALSE | TRUE | FALSE | 11.68 |
| P20930 | 2442 | HHKQABDSSBHS | FALSE | TRUE | FALSE | 13.79 |
| P20930 | 2443 | HKQABDSSBHST | FALSE | TRUE | FALSE | 14.37 |
| P20930 | 2445 | QABDSSBHSTSQ | FALSE | TRUE | FALSE | 22.88 |
| P20930 | 2446 | ABDSSBHSTSQE | FALSE | TRUE | FALSE | 24.49 |
| P20930 | 2447 | BDSSBHSTSQEG | FALSE | TRUE | FALSE | 21.72 |
| P20930 | 2448 | DSSBHSTSQEGQ | FALSE | TRUE | FALSE | 11.75 |
| P20930 | 2449 | SSBHSTSQEGQD | FALSE | TRUE | FALSE | 12.48 |
| P20930 | 2462 | IHGHPGSSSGGB | FALSE | TRUE | FALSE | 10.94 |
| P20930 | 2463 | HGHPGSSSGGBQ | FALSE | TRUE | FALSE | 16.71 |
| P20930 | 2464 | GHPGSSSGGBQC | FALSE | TRUE | FALSE | 12.32 |
| P20930 | 2465 | HPGSSSGGBQGS | FALSE | TRUE | FALSE | 20.53 |
| P20930 | 2466 | PGSSSGGBQGS  | FALSE | TRUE | FALSE | 10.45 |
| P20930 | 2467 | GSSSGGBQGS   | FALSE | TRUE | FALSE | 13.33 |
| P20930 | 2468 | SSSGGBQGS    | FALSE | TRUE | FALSE | 27.23 |
| P20930 | 2469 | SSGGBQGS     | FALSE | TRUE | FALSE | 32.61 |
| P20930 | 2470 | SGGBQGS      | FALSE | TRUE | FALSE | 30.78 |
| P20930 | 2471 | GGBQGS       | FALSE | TRUE | FALSE | 38.79 |
| P20930 | 2472 | GBQGS        | FALSE | TRUE | FALSE | 24.13 |
| P20930 | 2478 | YEQLVDBSGHSG | FALSE | TRUE | FALSE | 12.34 |
| P20930 | 2479 | EQLVDBSGHSGS | FALSE | TRUE | FALSE | 11.27 |
| P20930 | 2480 | QLVDBSGHSGSH | FALSE | TRUE | FALSE | 14.46 |
| P20930 | 2497 | SQGBSDASHGHS | FALSE | TRUE | FALSE | 10.72 |
| P20930 | 2498 | QGBSDASHGHS  | FALSE | TRUE | FALSE | 12.47 |
| P20930 | 2499 | GBSDASHGHS   | FALSE | TRUE | FALSE | 15.89 |
| P20930 | 2500 | BSDASHGHS    | FALSE | TRUE | FALSE | 14.07 |
| P20930 | 2504 | SHGHSBSASB   | FALSE | TRUE | FALSE | 21.86 |
| P20930 | 2505 | HGHSBSASBQ   | FALSE | TRUE | FALSE | 42.86 |
| P20930 | 2506 | GHSBSASBQT   | FALSE | TRUE | FALSE | 53.27 |
| P20930 | 2507 | HGSBSASBQTB  | FALSE | TRUE | FALSE | 53.02 |
| P20930 | 2508 | GSBSASBQTB   | FALSE | TRUE | FALSE | 69.99 |
| P20930 | 2509 | GSBSASBQTBND | FALSE | TRUE | FALSE | 54.86 |
| P20930 | 2510 | SBSASBQTBNDE | FALSE | TRUE | FALSE | 62.9  |
| P20930 | 2511 | BSASBQTBNDEQ | FALSE | TRUE | FALSE | 64.9  |
| P20930 | 2512 | SASBQTBNDEQS | FALSE | TRUE | FALSE | 43.18 |
| P20930 | 2513 | ASBQTBNDEQSG | FALSE | TRUE | FALSE | 48.46 |
| P20930 | 2514 | SBQTBNDEQSGD | FALSE | TRUE | FALSE | 42.53 |
| P20930 | 2515 | BQTBNDEQSGDG | FALSE | TRUE | FALSE | 25.61 |
| P20930 | 2516 | QTBNDEQSGDGS | FALSE | TRUE | FALSE | 13.45 |
| P20930 | 2517 | TBNDEQSGDGSB | FALSE | TRUE | FALSE | 11.57 |
| P20930 | 2518 | BNDEQSGDGSBH | FALSE | TRUE | FALSE | 12.27 |
| P20930 | 2521 | EQSGDGSBHS   | FALSE | TRUE | FALSE | 11.05 |
| P20930 | 2522 | QSGDGSBHS    | FALSE | TRUE | FALSE | 29.17 |
| P20930 | 2523 | SGDGSBHS     | FALSE | TRUE | FALSE | 23.67 |
| P20930 | 2524 | GDGSBHS      | FALSE | TRUE | FALSE | 16.38 |
| P20930 | 2525 | DGSBHS       | FALSE | TRUE | FALSE | 21.27 |
| P20930 | 2526 | GSBHS        | FALSE | TRUE | FALSE | 17.32 |
| P20930 | 2527 | SBHS         | FALSE | TRUE | FALSE | 19.24 |

|        |      |               |       |      |       |       |
|--------|------|---------------|-------|------|-------|-------|
| P20930 | 2528 | BHSGSBHHEASS  | FALSE | TRUE | FALSE | 21.43 |
| P20930 | 2529 | HSGSBHHEASSB  | FALSE | TRUE | FALSE | 27.25 |
| P20930 | 2530 | SGSBHHEASSBA  | FALSE | TRUE | FALSE | 19.79 |
| P20930 | 2531 | GSBHHEASSBAD  | FALSE | TRUE | FALSE | 15.62 |
| P20930 | 2532 | SBHHEASSBADS  | FALSE | TRUE | FALSE | 15.37 |
| P20930 | 2533 | BHHEASSBADSS  | FALSE | TRUE | FALSE | 12.94 |
| P20930 | 2537 | ASSBADSSGHSQ  | FALSE | TRUE | FALSE | 16.39 |
| P20930 | 2538 | SSBADSSGHSQV  | FALSE | TRUE | FALSE | 13.89 |
| P20930 | 2539 | SBADSSGHSQVG  | FALSE | TRUE | FALSE | 15.32 |
| P20930 | 2550 | GQQQSEGPBTSB  | FALSE | TRUE | FALSE | 13.96 |
| P20930 | 2551 | QQQSEGPBTSBN  | FALSE | TRUE | FALSE | 15.37 |
| P20930 | 2552 | GQSEGPBTSBNW  | FALSE | TRUE | FALSE | 20.31 |
| P20930 | 2553 | QSEGPBTSBNWG  | FALSE | TRUE | FALSE | 18.65 |
| P20930 | 2554 | SEGPBTSBNWGS  | FALSE | TRUE | FALSE | 21.45 |
| P20930 | 2555 | EGPBTSBNWGSS  | FALSE | TRUE | FALSE | 16.5  |
| P20930 | 2556 | GPBTSBNWGSSF  | FALSE | TRUE | FALSE | 23.26 |
| P20930 | 2557 | PBTSBNWGSSFS  | FALSE | TRUE | FALSE | 13.68 |
| P20930 | 2558 | BTSBNWGSSFSQ  | FALSE | TRUE | FALSE | 22.39 |
| P20930 | 2559 | TSBNWGSSFSQD  | FALSE | TRUE | FALSE | 14.53 |
| P20930 | 2560 | SBNWGSSFSQDS  | FALSE | TRUE | FALSE | 13.34 |
| P20930 | 2578 | EDSEBWGSASB   | FALSE | TRUE | FALSE | 12.59 |
| P20930 | 2579 | DSEBWGSASBN   | FALSE | TRUE | FALSE | 19.47 |
| P20930 | 2580 | SEBWGSASBNH   | FALSE | TRUE | FALSE | 19.19 |
| P20930 | 2581 | EBWGSASBNHH   | FALSE | TRUE | FALSE | 10.53 |
| P20930 | 2586 | SASBNHHGSAQE  | FALSE | TRUE | FALSE | 10.14 |
| P20930 | 2587 | ASBNHHGSAQEQ  | FALSE | TRUE | FALSE | 10.26 |
| P20930 | 2594 | SAQEQLBDGSBH  | FALSE | TRUE | FALSE | 14.98 |
| P20930 | 2595 | AQEQLBDGSBHP  | FALSE | TRUE | FALSE | 11.37 |
| P20930 | 2596 | QEQLBDGSBHPB  | FALSE | TRUE | FALSE | 26.26 |
| P20930 | 2597 | EQLBDGSBHPBS  | FALSE | TRUE | FALSE | 25.47 |
| P20930 | 2598 | QLBDGSBHPBSH  | FALSE | TRUE | FALSE | 34.2  |
| P20930 | 2599 | LBDGSBHPBSHQ  | FALSE | TRUE | FALSE | 26.94 |
| P20930 | 2600 | BDGSBHPBSHQE  | FALSE | TRUE | FALSE | 31.26 |
| P20930 | 2601 | DGSBHPBSHQED  | FALSE | TRUE | FALSE | 17.94 |
| P20930 | 2602 | GSBHPBSHQEDB  | FALSE | TRUE | FALSE | 13.14 |
| P20930 | 2603 | SBHPBSHQEDBA  | FALSE | TRUE | FALSE | 11.33 |
| P20930 | 2604 | BHPBSHQEDBAG  | FALSE | TRUE | FALSE | 13.56 |
| P20930 | 2605 | HPBSHQEDBAGH  | FALSE | TRUE | FALSE | 12.01 |
| P20930 | 2607 | BSHQEDBAGHGH  | FALSE | TRUE | FALSE | 12.71 |
| P20930 | 2613 | BAGHGHSAADSSB | FALSE | TRUE | FALSE | 10.74 |
| P20930 | 2616 | HGHSAADSSBQSG | FALSE | TRUE | FALSE | 10.43 |
| P20930 | 2617 | GHSAADSSBQSGT | FALSE | TRUE | FALSE | 10.21 |
| P20930 | 2618 | HSADSSBQSGTB  | FALSE | TRUE | FALSE | 21.28 |
| P20930 | 2619 | SADSSBQSGTBH  | FALSE | TRUE | FALSE | 24.83 |
| P20930 | 2620 | ADSSBQSGTBHT  | FALSE | TRUE | FALSE | 36.24 |
| P20930 | 2621 | DSSBQSGTBHTQ  | FALSE | TRUE | FALSE | 52.37 |
| P20930 | 2622 | SSBQSGTBHTQT  | FALSE | TRUE | FALSE | 66.35 |
| P20930 | 2623 | SBQSGTBHTQTS  | FALSE | TRUE | FALSE | 58.88 |
| P20930 | 2624 | BQSGTBHTQTSS  | FALSE | TRUE | FALSE | 53.2  |
| P20930 | 2625 | QSGTBHTQTSSG  | FALSE | TRUE | FALSE | 32.48 |
| P20930 | 2626 | SGTBHTQTSSGG  | FALSE | TRUE | FALSE | 17.44 |
| P20930 | 2627 | GTBHTQTSSGGQ  | FALSE | TRUE | FALSE | 25.6  |

|        |      |              |       |      |       |       |
|--------|------|--------------|-------|------|-------|-------|
| P20930 | 2643 | HEQABSSAGEBH | FALSE | TRUE | FALSE | 13.69 |
| P20930 | 2644 | EQABSSAGEBHG | FALSE | TRUE | FALSE | 15.63 |
| P20930 | 2645 | QABSSAGEBHGS | FALSE | TRUE | FALSE | 26.96 |
| P20930 | 2646 | ABSSAGEBHGSH | FALSE | TRUE | FALSE | 25.31 |
| P20930 | 2647 | BSSAGEBHGSHH | FALSE | TRUE | FALSE | 19.42 |
| P20930 | 2648 | SSAGEBHGSHHQ | FALSE | TRUE | FALSE | 19.1  |
| P20930 | 2649 | SAGEBHGSHHQQ | FALSE | TRUE | FALSE | 21.23 |
| P20930 | 2650 | AGEBHGSHHQQS | FALSE | TRUE | FALSE | 23.85 |
| P20930 | 2651 | GEBHGSHHQQSA | FALSE | TRUE | FALSE | 21.02 |
| P20930 | 2652 | EBHGSHHQQSAD | FALSE | TRUE | FALSE | 13.81 |
| P20930 | 2653 | BHGSHHQQSADS | FALSE | TRUE | FALSE | 12.18 |
| P20930 | 2658 | HQQSADSSBHSG | FALSE | TRUE | FALSE | 10.27 |
| P20930 | 2674 | QASSAVBDSGHB | FALSE | TRUE | FALSE | 13.54 |
| P20930 | 2675 | ASSAVBDSGHBG | FALSE | TRUE | FALSE | 19.79 |
| P20930 | 2676 | SSAVBDSGHBGY | FALSE | TRUE | FALSE | 29.37 |
| P20930 | 2677 | SAVBDSGHBGYS | FALSE | TRUE | FALSE | 29.07 |
| P20930 | 2678 | AVBDSGHBGYSG | FALSE | TRUE | FALSE | 26.75 |
| P20930 | 2679 | VBDSGHBGYSGS | FALSE | TRUE | FALSE | 20.72 |
| P20930 | 2680 | BDSGHBGYSGSQ | FALSE | TRUE | FALSE | 15.25 |
| P20930 | 2683 | GHBGYSGSQASD | FALSE | TRUE | FALSE | 12.11 |
| P20930 | 2684 | HBGYSGSQASDN | FALSE | TRUE | FALSE | 16.26 |
| P20930 | 2685 | BGYSGSQASDNE | FALSE | TRUE | FALSE | 10.85 |
| P20930 | 2716 | HQQSHQESABGB | FALSE | TRUE | FALSE | 13.96 |
| P20930 | 2717 | QQSHQESABGBS | FALSE | TRUE | FALSE | 19.67 |
| P20930 | 2718 | QSHQESABGBSG | FALSE | TRUE | FALSE | 17.98 |
| P20930 | 2719 | SHQESABGBSGE | FALSE | TRUE | FALSE | 16.85 |
| P20930 | 2720 | HQESABGBSGET | FALSE | TRUE | FALSE | 22.05 |
| P20930 | 2721 | QESABGBSGETS | FALSE | TRUE | FALSE | 25.35 |
| P20930 | 2722 | ESABGBSGETSG | FALSE | TRUE | FALSE | 23.47 |
| P20930 | 2723 | SABGBSGETSGH | FALSE | TRUE | FALSE | 40.89 |
| P20930 | 2724 | ABGBSGETSGHS | FALSE | TRUE | FALSE | 35.26 |
| P20930 | 2725 | BGBSGETSGHSG | FALSE | TRUE | FALSE | 29.07 |
| P20930 | 2726 | GBSGETSGHSGS | FALSE | TRUE | FALSE | 14.61 |
| P20930 | 2749 | ESSHGWTGPSTB | FALSE | TRUE | FALSE | 13.63 |
| P20930 | 2750 | SSHGWTGPSTBG | FALSE | TRUE | FALSE | 23.14 |
| P20930 | 2751 | SHGWTGPSTBGB | FALSE | TRUE | FALSE | 18.33 |
| P20930 | 2752 | HGWTGPSTBGBQ | FALSE | TRUE | FALSE | 50.78 |
| P20930 | 2753 | GWTGPSTBGBQG | FALSE | TRUE | FALSE | 46.24 |
| P20930 | 2754 | WTGPSTBGBQGS | FALSE | TRUE | FALSE | 51.61 |
| P20930 | 2755 | TGPSTBGBQGSB | FALSE | TRUE | FALSE | 52.99 |
| P20930 | 2756 | GPSTBGBQGSBH | FALSE | TRUE | FALSE | 53.46 |
| P20930 | 2757 | PSTBGBQGSBHE | FALSE | TRUE | FALSE | 67.84 |
| P20930 | 2758 | STBGBQGSBHEQ | FALSE | TRUE | FALSE | 98.88 |
| P20930 | 2759 | TBGBQGSBHEQA | FALSE | TRUE | FALSE | 41.33 |
| P20930 | 2760 | BGBQGSBHEQAQ | FALSE | TRUE | FALSE | 50.18 |
| P20930 | 2761 | GBQGSBHEQAQD | FALSE | TRUE | FALSE | 46.5  |
| P20930 | 2762 | BQGSBHEQAQDS | FALSE | TRUE | FALSE | 51.58 |
| P20930 | 2763 | QGSBHEQAQDSS | FALSE | TRUE | FALSE | 18.49 |
| P20930 | 2764 | GSBHEQAQDSSB | FALSE | TRUE | FALSE | 22.19 |
| P20930 | 2765 | SBHEQAQDSSBH | FALSE | TRUE | FALSE | 25.28 |
| P20930 | 2766 | BHEQAQDSSBHS | FALSE | TRUE | FALSE | 14.5  |
| P20930 | 2769 | QAQDSSBHSASQ | FALSE | TRUE | FALSE | 11.96 |



|        |      |              |       |      |       |       |
|--------|------|--------------|-------|------|-------|-------|
| P20930 | 2770 | AQDSSBHSASQD | FALSE | TRUE | FALSE | 11.51 |
| P20930 | 2771 | QDSSBHSASQDG | FALSE | TRUE | FALSE | 13.16 |
| P20930 | 2772 | DSSBHSASQDGQ | FALSE | TRUE | FALSE | 13.34 |
| P20930 | 2773 | SSBHSASQDGQD | FALSE | TRUE | FALSE | 15.81 |
| P20930 | 2774 | SBHSASQDGQDT | FALSE | TRUE | FALSE | 13.89 |
| P20930 | 2781 | DGQDTIBGHPGS | FALSE | TRUE | FALSE | 13.58 |
| P20930 | 2782 | GQDTIBGHPGSS | FALSE | TRUE | FALSE | 18.34 |
| P20930 | 2783 | QDTIBGHPGSSB | FALSE | TRUE | FALSE | 26.41 |
| P20930 | 2784 | DTIBGHPGSSBG | FALSE | TRUE | FALSE | 35.92 |
| P20930 | 2785 | TIBGHPGSSBGG | FALSE | TRUE | FALSE | 20.7  |
| P20930 | 2786 | IBGHPGSSBGGB | FALSE | TRUE | FALSE | 23    |
| P20930 | 2787 | BGHPGSSBGGBQ | FALSE | TRUE | FALSE | 60.88 |
| P20930 | 2788 | GHPGSSBGGBQG | FALSE | TRUE | FALSE | 44.25 |
| P20930 | 2789 | HPGSSBGGBQGY | FALSE | TRUE | FALSE | 66.17 |
| P20930 | 2790 | PGSSBGGBQGYH | FALSE | TRUE | FALSE | 36.34 |
| P20930 | 2791 | GSSBGGBQGYHH | FALSE | TRUE | FALSE | 37.58 |
| P20930 | 2792 | SSBGGBQGYHHE | FALSE | TRUE | FALSE | 61.61 |
| P20930 | 2793 | SBGGBQGYHHEH | FALSE | TRUE | FALSE | 49.46 |
| P20930 | 2794 | BGGBQGYHHEHS | FALSE | TRUE | FALSE | 51.1  |
| P20930 | 2795 | GGBQGYHHEHSV | FALSE | TRUE | FALSE | 42.37 |
| P20930 | 2796 | GBQGYHHEHSVD | FALSE | TRUE | FALSE | 31.28 |
| P20930 | 2797 | BQGYHHEHSVDS | FALSE | TRUE | FALSE | 10.47 |
| P20930 | 2818 | HTTSQGBSDASB | FALSE | TRUE | FALSE | 14.85 |
| P20930 | 2819 | TTSQGBSDASBG | FALSE | TRUE | FALSE | 23.27 |
| P20930 | 2820 | TSQGBSDASBGQ | FALSE | TRUE | FALSE | 33.06 |
| P20930 | 2821 | SQGBSDASBGQS | FALSE | TRUE | FALSE | 30.94 |
| P20930 | 2822 | QGBSDASBGQSG | FALSE | TRUE | FALSE | 37.33 |
| P20930 | 2823 | GBSDASBGQSGS | FALSE | TRUE | FALSE | 36.13 |
| P20930 | 2824 | BSDASBGQSGSB | FALSE | TRUE | FALSE | 35.8  |
| P20930 | 2825 | SDASBGQSGSBS | FALSE | TRUE | FALSE | 25.54 |
| P20930 | 2826 | DASBGQSGSBSA | FALSE | TRUE | FALSE | 25.83 |
| P20930 | 2827 | ASBGQSGSBSAS | FALSE | TRUE | FALSE | 26.8  |
| P20930 | 2828 | SBGQSGSBSASB | FALSE | TRUE | FALSE | 38.88 |
| P20930 | 2829 | BGQSGSBSASBT | FALSE | TRUE | FALSE | 40.84 |
| P20930 | 2830 | GQSGSBSASBTT | FALSE | TRUE | FALSE | 28.42 |
| P20930 | 2831 | QSGSBSASBTTB | FALSE | TRUE | FALSE | 36.26 |
| P20930 | 2832 | SGSBSASBTTBN | FALSE | TRUE | FALSE | 55.64 |
| P20930 | 2833 | GSBSASBTTBNE | FALSE | TRUE | FALSE | 44.25 |
| P20930 | 2834 | SBSASBTTBNEE | FALSE | TRUE | FALSE | 38.07 |
| P20930 | 2835 | BSASBTTBNEEQ | FALSE | TRUE | FALSE | 36.78 |
| P20930 | 2836 | SASBTTBNEEQS | FALSE | TRUE | FALSE | 24.48 |
| P20930 | 2837 | ASBTTBNEEQSG | FALSE | TRUE | FALSE | 25.55 |
| P20930 | 2838 | SBTTBNEEQSGD | FALSE | TRUE | FALSE | 23.49 |
| P20930 | 2839 | BTTBNEEQSGDG | FALSE | TRUE | FALSE | 15.74 |
| P20930 | 2841 | TBNEEQSGDGSB | FALSE | TRUE | FALSE | 10.67 |
| P20930 | 2842 | BNEEQSGDGSBH | FALSE | TRUE | FALSE | 15.26 |
| P20930 | 2845 | EQSGDGSBHSGS | FALSE | TRUE | FALSE | 11.05 |
| P20930 | 2846 | QSGDGSBHSGSB | FALSE | TRUE | FALSE | 29.17 |
| P20930 | 2847 | SGDGSBHSGSBH | FALSE | TRUE | FALSE | 23.67 |
| P20930 | 2848 | GDGSBHSGSBHH | FALSE | TRUE | FALSE | 16.38 |
| P20930 | 2849 | DGSBHSGSBHHE | FALSE | TRUE | FALSE | 21.27 |
| P20930 | 2850 | GSBHSGSBHHEA | FALSE | TRUE | FALSE | 17.32 |

|        |      |              |       |      |       |       |
|--------|------|--------------|-------|------|-------|-------|
| P20930 | 2851 | SBHSGSBHHEAS | FALSE | TRUE | FALSE | 19.24 |
| P20930 | 2852 | BHSGSBHHEAST | FALSE | TRUE | FALSE | 18.35 |
| P20930 | 2853 | HSGSBHHEASTH | FALSE | TRUE | FALSE | 15.95 |
| P20930 | 2854 | SGSBHHEASTHA | FALSE | TRUE | FALSE | 16.34 |
| P20930 | 2855 | GSBHHEASTHAD | FALSE | TRUE | FALSE | 14.93 |
| P20930 | 2856 | SBHHEASTHADI | FALSE | TRUE | FALSE | 10.81 |
| P20930 | 2861 | ASTHADISBHSQ | FALSE | TRUE | FALSE | 10.49 |
| P20930 | 2863 | THADISBHSQAV | FALSE | TRUE | FALSE | 10.03 |
| P20930 | 2864 | HADISBHSQAVQ | FALSE | TRUE | FALSE | 22.84 |
| P20930 | 2865 | ADISBHSQAVQG | FALSE | TRUE | FALSE | 22.29 |
| P20930 | 2866 | DISBHSQAVQGQ | FALSE | TRUE | FALSE | 26    |
| P20930 | 2867 | ISBHSQAVQGQS | FALSE | TRUE | FALSE | 24.08 |
| P20930 | 2868 | SBHSQAVQGQSE | FALSE | TRUE | FALSE | 15.14 |
| P20930 | 2872 | QAVQGQSEGSBB | FALSE | TRUE | FALSE | 10.36 |
| P20930 | 2873 | AVQGQSEGSBBS | FALSE | TRUE | FALSE | 10.95 |
| P20930 | 2874 | VQGQSEGSBBSB | FALSE | TRUE | FALSE | 16.29 |
| P20930 | 2875 | QGQSEGSBBSBB | FALSE | TRUE | FALSE | 11.79 |
| P20930 | 2876 | GQSEGSBBSBBQ | FALSE | TRUE | FALSE | 34.23 |
| P20930 | 2877 | QSEGSBBSBBQG | FALSE | TRUE | FALSE | 34.99 |
| P20930 | 2878 | SEGSBBSBBQGS | FALSE | TRUE | FALSE | 40.42 |
| P20930 | 2879 | EGSBBSBBQGSS | FALSE | TRUE | FALSE | 42.96 |
| P20930 | 2880 | GSBBSBBQGSSV | FALSE | TRUE | FALSE | 54.22 |
| P20930 | 2881 | SBBSBBQGSSVS | FALSE | TRUE | FALSE | 68.88 |
| P20930 | 2882 | BBSBBQGSSVSQ | FALSE | TRUE | FALSE | 78.46 |
| P20930 | 2883 | BSBBQGSSVSQD | FALSE | TRUE | FALSE | 81.76 |
| P20930 | 2884 | SBBQGSSVSQDS | FALSE | TRUE | FALSE | 59    |
| P20930 | 2885 | BBQGSSVSQDSD | FALSE | TRUE | FALSE | 30.39 |
| P20930 | 2902 | EDSEBWGSASB  | FALSE | TRUE | FALSE | 12.59 |
| P20930 | 2903 | DSEBWGSASBN  | FALSE | TRUE | FALSE | 19.47 |
| P20930 | 2904 | SEBWGSASBNH  | FALSE | TRUE | FALSE | 19.19 |
| P20930 | 2905 | EBWGSASBNHH  | FALSE | TRUE | FALSE | 10.53 |
| P20930 | 2910 | SASBNHHGSAQE | FALSE | TRUE | FALSE | 10.14 |
| P20930 | 2911 | ASBNHHGSAQEQ | FALSE | TRUE | FALSE | 10.26 |
| P20930 | 2918 | SAQEQLBDGSBH | FALSE | TRUE | FALSE | 14.98 |
| P20930 | 2919 | AQEQLBDGSBHP | FALSE | TRUE | FALSE | 11.37 |
| P20930 | 2920 | QEQLBDGSBHPB | FALSE | TRUE | FALSE | 26.26 |
| P20930 | 2921 | EQLBDGSBHPBS | FALSE | TRUE | FALSE | 25.47 |
| P20930 | 2922 | QLBDGSBHPBSH | FALSE | TRUE | FALSE | 34.2  |
| P20930 | 2923 | LBDGSBHPBSHQ | FALSE | TRUE | FALSE | 26.94 |
| P20930 | 2924 | BDGSBHPBSHQE | FALSE | TRUE | FALSE | 31.26 |
| P20930 | 2925 | DGSBHPBSHQED | FALSE | TRUE | FALSE | 17.94 |
| P20930 | 2926 | GSBHPBSHQEDB | FALSE | TRUE | FALSE | 13.14 |
| P20930 | 2927 | SBHPBSHQEDBA | FALSE | TRUE | FALSE | 11.33 |
| P20930 | 2928 | BHPBSHQEDBAG | FALSE | TRUE | FALSE | 13.56 |
| P20930 | 2929 | HPBSHQEDBAGH | FALSE | TRUE | FALSE | 12.01 |
| P20930 | 2931 | BSHQEDBAGHGH | FALSE | TRUE | FALSE | 12.71 |
| P20930 | 2937 | BAGHGHSADSSB | FALSE | TRUE | FALSE | 10.74 |
| P20930 | 2940 | HGHSADSSBQSG | FALSE | TRUE | FALSE | 10.43 |
| P20930 | 2941 | GHSADSSBQSGT | FALSE | TRUE | FALSE | 10.21 |
| P20930 | 2942 | HSADSSBQSGTB | FALSE | TRUE | FALSE | 21.28 |
| P20930 | 2943 | SADSSBQSGTBH | FALSE | TRUE | FALSE | 24.83 |
| P20930 | 2944 | ADSSBQSGTBHT | FALSE | TRUE | FALSE | 36.24 |

|        |      |               |       |      |       |       |
|--------|------|---------------|-------|------|-------|-------|
| P20930 | 2945 | DSSBQSGTBHTQ  | FALSE | TRUE | FALSE | 52.37 |
| P20930 | 2946 | SSBQSGTBHTQT  | FALSE | TRUE | FALSE | 66.35 |
| P20930 | 2947 | SBQSGTBHTQTS  | FALSE | TRUE | FALSE | 58.88 |
| P20930 | 2948 | BQSGTBHTQTSS  | FALSE | TRUE | FALSE | 53.2  |
| P20930 | 2949 | QSGTBHTQTSSG  | FALSE | TRUE | FALSE | 32.48 |
| P20930 | 2950 | SGTBHTQTSSGG  | FALSE | TRUE | FALSE | 17.44 |
| P20930 | 2951 | GTBHTQTSSGGQ  | FALSE | TRUE | FALSE | 25.6  |
| P20930 | 2967 | HEQABSSAGEBH  | FALSE | TRUE | FALSE | 13.69 |
| P20930 | 2968 | EQABSSAGEBHG  | FALSE | TRUE | FALSE | 15.63 |
| P20930 | 2969 | QABSSAGEBHGS  | FALSE | TRUE | FALSE | 26.96 |
| P20930 | 2970 | ABSSAGEBHGSH  | FALSE | TRUE | FALSE | 25.31 |
| P20930 | 2971 | BSSAGEBHGS HH | FALSE | TRUE | FALSE | 19.42 |
| P20930 | 2972 | SSAGEBHGS HHQ | FALSE | TRUE | FALSE | 19.1  |
| P20930 | 2973 | SAGEBHGS HHQQ | FALSE | TRUE | FALSE | 21.23 |
| P20930 | 2974 | AGEBHGS HHQQS | FALSE | TRUE | FALSE | 23.85 |
| P20930 | 2975 | GEBHGS HHQQSA | FALSE | TRUE | FALSE | 21.02 |
| P20930 | 2976 | EBHGS HHQQSAD | FALSE | TRUE | FALSE | 13.81 |
| P20930 | 2977 | BHGS HHQQSADS | FALSE | TRUE | FALSE | 12.18 |
| P20930 | 2982 | HQQSADSSB HSG | FALSE | TRUE | FALSE | 10.27 |
| P20930 | 2998 | QASSAVBDSGHB  | FALSE | TRUE | FALSE | 13.54 |
| P20930 | 2999 | ASSAVBDSGHBG  | FALSE | TRUE | FALSE | 19.79 |
| P20930 | 3000 | SSAVBDSGHBGY  | FALSE | TRUE | FALSE | 29.37 |
| P20930 | 3001 | SAVBDSGHBGYS  | FALSE | TRUE | FALSE | 29.07 |
| P20930 | 3002 | AVBDSGHBGYSG  | FALSE | TRUE | FALSE | 26.75 |
| P20930 | 3003 | VBDSGHBGYSGS  | FALSE | TRUE | FALSE | 20.72 |
| P20930 | 3004 | BDSGHBGYSGSQ  | FALSE | TRUE | FALSE | 15.25 |
| P20930 | 3007 | GHBGYSGSQASD  | FALSE | TRUE | FALSE | 12.11 |
| P20930 | 3008 | HBGYSGSQASDN  | FALSE | TRUE | FALSE | 16.26 |
| P20930 | 3009 | BGYSGSQASDNE  | FALSE | TRUE | FALSE | 10.85 |
| P20930 | 3040 | HQQSHQESABGB  | FALSE | TRUE | FALSE | 13.96 |
| P20930 | 3041 | QQSHQESABGBS  | FALSE | TRUE | FALSE | 19.67 |
| P20930 | 3042 | QSHQESABGBSG  | FALSE | TRUE | FALSE | 17.98 |
| P20930 | 3043 | SHQESABGBSGE  | FALSE | TRUE | FALSE | 16.85 |
| P20930 | 3044 | HQESABGBSGET  | FALSE | TRUE | FALSE | 22.05 |
| P20930 | 3045 | QESABGBSGETS  | FALSE | TRUE | FALSE | 25.35 |
| P20930 | 3046 | ESABGBSGETSG  | FALSE | TRUE | FALSE | 23.47 |
| P20930 | 3047 | SABGBSGETSGH  | FALSE | TRUE | FALSE | 40.89 |
| P20930 | 3048 | ABGBSGETSGHS  | FALSE | TRUE | FALSE | 35.26 |
| P20930 | 3049 | BGBSGETSGHSG  | FALSE | TRUE | FALSE | 29.07 |
| P20930 | 3050 | GBSGETSGHSGS  | FALSE | TRUE | FALSE | 14.61 |
| P20930 | 3073 | ESSHGWTGPSTB  | FALSE | TRUE | FALSE | 13.63 |
| P20930 | 3074 | SSHGWTGPSTBG  | FALSE | TRUE | FALSE | 23.14 |
| P20930 | 3075 | SHGWTGPSTBGB  | FALSE | TRUE | FALSE | 18.33 |
| P20930 | 3076 | HGWTGPSTBGBQ  | FALSE | TRUE | FALSE | 50.78 |
| P20930 | 3077 | GWTGPSTBGBQG  | FALSE | TRUE | FALSE | 46.24 |
| P20930 | 3078 | WTGPSTBGBQGS  | FALSE | TRUE | FALSE | 51.61 |
| P20930 | 3079 | TGPSTBGBQGSB  | FALSE | TRUE | FALSE | 52.99 |
| P20930 | 3080 | GPSTBGBQGSBH  | FALSE | TRUE | FALSE | 53.46 |
| P20930 | 3081 | PSTBGBQGSBHE  | FALSE | TRUE | FALSE | 67.84 |
| P20930 | 3082 | STBGBQGSBHEQ  | FALSE | TRUE | FALSE | 98.88 |
| P20930 | 3083 | TBGBQGSBHEQA  | FALSE | TRUE | FALSE | 41.33 |
| P20930 | 3084 | BGBQGSBHEQAQ  | FALSE | TRUE | FALSE | 50.18 |

|        |      |              |       |      |       |       |
|--------|------|--------------|-------|------|-------|-------|
| P20930 | 3085 | GBQGSBHEQAQD | FALSE | TRUE | FALSE | 46.5  |
| P20930 | 3086 | BQGSBHEQAQDS | FALSE | TRUE | FALSE | 51.58 |
| P20930 | 3087 | QGSBHEQAQDSS | FALSE | TRUE | FALSE | 18.49 |
| P20930 | 3088 | GSBHEQAQDSSB | FALSE | TRUE | FALSE | 22.19 |
| P20930 | 3089 | SBHEQAQDSSBH | FALSE | TRUE | FALSE | 25.28 |
| P20930 | 3090 | BHEQAQDSSBHS | FALSE | TRUE | FALSE | 14.5  |
| P20930 | 3093 | QAQDSSBHSASQ | FALSE | TRUE | FALSE | 11.96 |
| P20930 | 3094 | AQDSSBHSASQY | FALSE | TRUE | FALSE | 11.48 |
| P20930 | 3095 | QDSSBHSASQYG | FALSE | TRUE | FALSE | 14.34 |
| P20930 | 3096 | DSSBHSASQYGQ | FALSE | TRUE | FALSE | 15.44 |
| P20930 | 3097 | SSBHSASQYGQD | FALSE | TRUE | FALSE | 17.29 |
| P20930 | 3098 | SBHSASQYGQDT | FALSE | TRUE | FALSE | 17.1  |
| P20930 | 3101 | SASQYGQDTIBG | FALSE | TRUE | FALSE | 11.31 |
| P20930 | 3102 | ASQYGQDTIBGH | FALSE | TRUE | FALSE | 16.77 |
| P20930 | 3103 | SQYGQDTIBGHP | FALSE | TRUE | FALSE | 20.67 |
| P20930 | 3104 | QYGQDTIBGHPG | FALSE | TRUE | FALSE | 20.46 |
| P20930 | 3105 | YGQDTIBGHPGS | FALSE | TRUE | FALSE | 34.36 |
| P20930 | 3106 | GQDTIBGHPGSS | FALSE | TRUE | FALSE | 18.34 |
| P20930 | 3107 | QDTIBGHPGSSB | FALSE | TRUE | FALSE | 26.41 |
| P20930 | 3108 | DTIBGHPGSSBG | FALSE | TRUE | FALSE | 35.92 |
| P20930 | 3109 | TIBGHPGSSBGG | FALSE | TRUE | FALSE | 20.7  |
| P20930 | 3110 | IBGHPGSSBGGB | FALSE | TRUE | FALSE | 23    |
| P20930 | 3111 | BGHPGSSBGGBQ | FALSE | TRUE | FALSE | 60.88 |
| P20930 | 3112 | GHPGSSBGGBQC | FALSE | TRUE | FALSE | 44.25 |
| P20930 | 3113 | HPGSSBGGBQGY | FALSE | TRUE | FALSE | 66.17 |
| P20930 | 3114 | PGSSBGGBQGYH | FALSE | TRUE | FALSE | 36.34 |
| P20930 | 3115 | GSSBGGBQGYHH | FALSE | TRUE | FALSE | 37.58 |
| P20930 | 3116 | SSBGGBQGYHHE | FALSE | TRUE | FALSE | 61.61 |
| P20930 | 3117 | SBGGBQGYHHEH | FALSE | TRUE | FALSE | 49.46 |
| P20930 | 3118 | BGGBQGYHHEHS | FALSE | TRUE | FALSE | 51.1  |
| P20930 | 3119 | GGBQGYHHEHSV | FALSE | TRUE | FALSE | 42.37 |
| P20930 | 3120 | GBQGYHHEHSVD | FALSE | TRUE | FALSE | 31.28 |
| P20930 | 3121 | BQGYHHEHSVDS | FALSE | TRUE | FALSE | 10.47 |
| P20930 | 3142 | HTTSQGBSDASB | FALSE | TRUE | FALSE | 14.85 |
| P20930 | 3143 | TTSQGBSDASBG | FALSE | TRUE | FALSE | 23.27 |
| P20930 | 3144 | TSQGBSDASBGQ | FALSE | TRUE | FALSE | 33.06 |
| P20930 | 3145 | SQGBSDASBGQS | FALSE | TRUE | FALSE | 30.94 |
| P20930 | 3146 | QGBSDASBGQSG | FALSE | TRUE | FALSE | 37.33 |
| P20930 | 3147 | GBSDASBGQSGS | FALSE | TRUE | FALSE | 36.13 |
| P20930 | 3148 | BSDASBGQSGSB | FALSE | TRUE | FALSE | 35.8  |
| P20930 | 3149 | SDASBGQSGSBS | FALSE | TRUE | FALSE | 25.54 |
| P20930 | 3150 | DASBGQSGSBSA | FALSE | TRUE | FALSE | 25.83 |
| P20930 | 3151 | ASBGQSGSBSAS | FALSE | TRUE | FALSE | 26.8  |
| P20930 | 3152 | SBGQSGSBSASB | FALSE | TRUE | FALSE | 38.88 |
| P20930 | 3153 | BGQSGSBSASBT | FALSE | TRUE | FALSE | 40.84 |
| P20930 | 3154 | GQSGSBSASBTT | FALSE | TRUE | FALSE | 28.42 |
| P20930 | 3155 | QSGSBSASBTTB | FALSE | TRUE | FALSE | 36.26 |
| P20930 | 3156 | SGSBSASBTTBN | FALSE | TRUE | FALSE | 55.64 |
| P20930 | 3157 | GSBSASBTTBNE | FALSE | TRUE | FALSE | 44.25 |
| P20930 | 3158 | SBSASBTTBNEE | FALSE | TRUE | FALSE | 38.07 |
| P20930 | 3159 | BSASBTTBNEEQ | FALSE | TRUE | FALSE | 36.78 |
| P20930 | 3160 | SASBTTBNEEQS | FALSE | TRUE | FALSE | 24.48 |

|        |      |               |       |      |       |       |
|--------|------|---------------|-------|------|-------|-------|
| P20930 | 3161 | ASBTTBNEEQSG  | FALSE | TRUE | FALSE | 25.55 |
| P20930 | 3162 | SBTTBNEEQSGD  | FALSE | TRUE | FALSE | 23.49 |
| P20930 | 3163 | BTTBNEEQSGDS  | FALSE | TRUE | FALSE | 17.88 |
| P20930 | 3165 | TBNEEQSGDSSB  | FALSE | TRUE | FALSE | 10.42 |
| P20930 | 3166 | BNEEQSGDSSBH  | FALSE | TRUE | FALSE | 13.73 |
| P20930 | 3170 | QSGDSSBHSVSB  | FALSE | TRUE | FALSE | 24.27 |
| P20930 | 3171 | SGDSSBHSVSBH  | FALSE | TRUE | FALSE | 18.24 |
| P20930 | 3172 | GDSSBHSVSBHH  | FALSE | TRUE | FALSE | 14.05 |
| P20930 | 3173 | DSSBHSVSBHHE  | FALSE | TRUE | FALSE | 21.28 |
| P20930 | 3174 | SSBHSVSBHHEA  | FALSE | TRUE | FALSE | 21.97 |
| P20930 | 3175 | SBHSVSBHHEAS  | FALSE | TRUE | FALSE | 18.38 |
| P20930 | 3176 | BHSVSBHHEAST  | FALSE | TRUE | FALSE | 23.24 |
| P20930 | 3177 | HSVSBHHEASTH  | FALSE | TRUE | FALSE | 14.57 |
| P20930 | 3178 | SVSBHHEASTHA  | FALSE | TRUE | FALSE | 14.19 |
| P20930 | 3179 | VSBHHEASTHAD  | FALSE | TRUE | FALSE | 15.35 |
| P20930 | 3180 | SBHHEASTHADI  | FALSE | TRUE | FALSE | 10.81 |
| P20930 | 3185 | ASTHADISBHSQ  | FALSE | TRUE | FALSE | 10.49 |
| P20930 | 3187 | THADISBHSQAV  | FALSE | TRUE | FALSE | 10.03 |
| P20930 | 3188 | HADISBHSQAVQ  | FALSE | TRUE | FALSE | 22.84 |
| P20930 | 3189 | ADISBHSQAVQG  | FALSE | TRUE | FALSE | 22.29 |
| P20930 | 3190 | DISBHSQAVQQG  | FALSE | TRUE | FALSE | 26    |
| P20930 | 3191 | ISBHSQAVQQQS  | FALSE | TRUE | FALSE | 24.08 |
| P20930 | 3192 | SBHSQAVQQQSE  | FALSE | TRUE | FALSE | 15.14 |
| P20930 | 3196 | QAVQQQSEGSBB  | FALSE | TRUE | FALSE | 10.36 |
| P20930 | 3197 | AVQQQSEGSBBS  | FALSE | TRUE | FALSE | 10.95 |
| P20930 | 3198 | VQQQSEGSBBSB  | FALSE | TRUE | FALSE | 16.29 |
| P20930 | 3199 | QQQSEGSBBSBB  | FALSE | TRUE | FALSE | 11.79 |
| P20930 | 3200 | GQQSEGSBBSBBQ | FALSE | TRUE | FALSE | 34.23 |
| P20930 | 3201 | QSEGSBBSBBQG  | FALSE | TRUE | FALSE | 34.99 |
| P20930 | 3202 | SEGSBBSBBQGS  | FALSE | TRUE | FALSE | 40.42 |
| P20930 | 3203 | EGSBBSBBQGSS  | FALSE | TRUE | FALSE | 42.96 |
| P20930 | 3204 | GSBBSBBQGSSV  | FALSE | TRUE | FALSE | 54.22 |
| P20930 | 3205 | SBBSBBQGSSVS  | FALSE | TRUE | FALSE | 68.88 |
| P20930 | 3206 | BBSBBQGSSVSQ  | FALSE | TRUE | FALSE | 78.46 |
| P20930 | 3207 | BSBBQGSSVSQD  | FALSE | TRUE | FALSE | 81.76 |
| P20930 | 3208 | SBBQGSSVSQDS  | FALSE | TRUE | FALSE | 59    |
| P20930 | 3209 | BBQGSSVSQDSD  | FALSE | TRUE | FALSE | 30.39 |
| P20930 | 3226 | EDSEBWGSASB   | FALSE | TRUE | FALSE | 12.59 |
| P20930 | 3227 | DSEBWGSASBN   | FALSE | TRUE | FALSE | 19.47 |
| P20930 | 3228 | SEBWGSASBNH   | FALSE | TRUE | FALSE | 19.19 |
| P20930 | 3229 | EBWGSASBNHB   | FALSE | TRUE | FALSE | 24.92 |
| P20930 | 3230 | BWGSASBNHBG   | FALSE | TRUE | FALSE | 30.84 |
| P20930 | 3231 | WGSASBNHBGS   | FALSE | TRUE | FALSE | 34.63 |
| P20930 | 3232 | SGSASBNHBGSV  | FALSE | TRUE | FALSE | 48.16 |
| P20930 | 3233 | GSASBNHBGSVQ  | FALSE | TRUE | FALSE | 37.45 |
| P20930 | 3234 | SASBNHBGSVQE  | FALSE | TRUE | FALSE | 62.5  |
| P20930 | 3235 | ASBNHBGSVQEQ  | FALSE | TRUE | FALSE | 51.99 |
| P20930 | 3236 | SBNHBGSVQEQS  | FALSE | TRUE | FALSE | 54.85 |
| P20930 | 3237 | BNHBGSVQEQSB  | FALSE | TRUE | FALSE | 39.13 |
| P20930 | 3238 | NHBGSVQEQSBH  | FALSE | TRUE | FALSE | 31.88 |
| P20930 | 3239 | HBGSVQEQSBHG  | FALSE | TRUE | FALSE | 55.58 |
| P20930 | 3240 | BGSVQEQSBHGS  | FALSE | TRUE | FALSE | 63.68 |

|        |      |            |       |      |       |       |
|--------|------|------------|-------|------|-------|-------|
| P20930 | 3241 | GSVQEQSBHG | FALSE | TRUE | FALSE | 21.71 |
| P20930 | 3242 | SVQEQSBHG  | FALSE | TRUE | FALSE | 30.32 |
| P20930 | 3243 | VQEQSBHG   | FALSE | TRUE | FALSE | 37.45 |
| P20930 | 3244 | QEQSBHG    | FALSE | TRUE | FALSE | 47.9  |
| P20930 | 3245 | EQSBHG     | FALSE | TRUE | FALSE | 49.1  |
| P20930 | 3246 | QSBHG      | FALSE | TRUE | FALSE | 37.18 |
| P20930 | 3247 | SBHG       | FALSE | TRUE | FALSE | 24.81 |
| P20930 | 3248 | BHG        | FALSE | TRUE | FALSE | 26.13 |
| P20930 | 3249 | HG         | FALSE | TRUE | FALSE | 23.52 |
| P20930 | 3250 | GSBHP      | FALSE | TRUE | FALSE | 20.31 |
| P20930 | 3251 | SBHP       | FALSE | TRUE | FALSE | 13.17 |
| P20930 | 3252 | BHP        | FALSE | TRUE | FALSE | 18.49 |
| P20930 | 3253 | HP         | FALSE | TRUE | FALSE | 18.25 |
| P20930 | 3254 | PBSH       | FALSE | TRUE | FALSE | 10.03 |
| P20930 | 3255 | BSH        | FALSE | TRUE | FALSE | 15.1  |
| P20930 | 3258 | HEDB       | FALSE | TRUE | FALSE | 12.67 |
| P20930 | 3260 | DBAGH      | FALSE | TRUE | FALSE | 14.14 |
| P20930 | 3261 | BAGH       | FALSE | TRUE | FALSE | 17.76 |
| P20930 | 3262 | AGH        | FALSE | TRUE | FALSE | 14.69 |
| P20930 | 3263 | GHG        | FALSE | TRUE | FALSE | 17.1  |
| P20930 | 3264 | HG         | FALSE | TRUE | FALSE | 22.16 |
| P20930 | 3265 | GHS        | FALSE | TRUE | FALSE | 20.14 |
| P20930 | 3266 | HS         | FALSE | TRUE | FALSE | 38.03 |
| P20930 | 3267 | SAD        | FALSE | TRUE | FALSE | 37.72 |
| P20930 | 3268 | AD         | FALSE | TRUE | FALSE | 42.2  |
| P20930 | 3269 | DB         | FALSE | TRUE | FALSE | 48.55 |
| P20930 | 3270 | BS         | FALSE | TRUE | FALSE | 66.34 |
| P20930 | 3271 | SB         | FALSE | TRUE | FALSE | 50.04 |
| P20930 | 3272 | BQ         | FALSE | TRUE | FALSE | 38.31 |
| P20930 | 3273 | QS         | FALSE | TRUE | FALSE | 17.74 |
| P20930 | 3275 | GT         | FALSE | TRUE | FALSE | 13.86 |
| P20930 | 3291 | HE         | FALSE | TRUE | FALSE | 11.12 |
| P20930 | 3292 | EQ         | FALSE | TRUE | FALSE | 11.26 |
| P20930 | 3293 | QA         | FALSE | TRUE | FALSE | 24.28 |
| P20930 | 3294 | AB         | FALSE | TRUE | FALSE | 35.51 |
| P20930 | 3295 | BSS        | FALSE | TRUE | FALSE | 34.23 |
| P20930 | 3296 | SS         | FALSE | TRUE | FALSE | 27.44 |
| P20930 | 3297 | SP         | FALSE | TRUE | FALSE | 22.7  |
| P20930 | 3298 | PG         | FALSE | TRUE | FALSE | 18.56 |
| P20930 | 3299 | GE         | FALSE | TRUE | FALSE | 26.94 |
| P20930 | 3300 | EB         | FALSE | TRUE | FALSE | 27.56 |
| P20930 | 3301 | BH         | FALSE | TRUE | FALSE | 29.89 |
| P20930 | 3302 | HG         | FALSE | TRUE | FALSE | 18.47 |
| P20930 | 3303 | GS         | FALSE | TRUE | FALSE | 22.42 |
| P20930 | 3304 | SB         | FALSE | TRUE | FALSE | 20.5  |
| P20930 | 3305 | BH         | FALSE | TRUE | FALSE | 13.43 |
| P20930 | 3306 | HQ         | FALSE | TRUE | FALSE | 10.27 |
| P20930 | 3309 | SAD        | FALSE | TRUE | FALSE | 17.8  |
| P20930 | 3310 | AD         | FALSE | TRUE | FALSE | 21.69 |
| P20930 | 3311 | DSS        | FALSE | TRUE | FALSE | 37.44 |
| P20930 | 3312 | SS         | FALSE | TRUE | FALSE | 15.88 |
| P20930 | 3313 | SB         | FALSE | TRUE | FALSE | 24.38 |

|        |      |              |       |      |       |       |
|--------|------|--------------|-------|------|-------|-------|
| P20930 | 3314 | BHSGIPBGQASS | FALSE | TRUE | FALSE | 23.82 |
| P20930 | 3315 | HSGIPBGQASSA | FALSE | TRUE | FALSE | 18.54 |
| P20930 | 3316 | SGIPBGQASSAV | FALSE | TRUE | FALSE | 18.02 |
| P20930 | 3317 | GIPBGQASSAVB | FALSE | TRUE | FALSE | 27.2  |
| P20930 | 3318 | IPBGQASSAVBD | FALSE | TRUE | FALSE | 26.36 |
| P20930 | 3319 | PBGQASSAVBDS | FALSE | TRUE | FALSE | 25.76 |
| P20930 | 3320 | BGQASSAVBDSB | FALSE | TRUE | FALSE | 34.5  |
| P20930 | 3321 | GQASSAVBDSBH | FALSE | TRUE | FALSE | 17.86 |
| P20930 | 3322 | QASSAVBDSBHW | FALSE | TRUE | FALSE | 17.89 |
| P20930 | 3323 | ASSAVBDSBHWG | FALSE | TRUE | FALSE | 21.24 |
| P20930 | 3324 | SSAVBDSBHWGS | FALSE | TRUE | FALSE | 21.99 |
| P20930 | 3325 | SAVBDSBHWGSS | FALSE | TRUE | FALSE | 19.46 |
| P20930 | 3326 | AVBDSBHWGSSG | FALSE | TRUE | FALSE | 19.16 |
| P20930 | 3327 | VBDSBHWGSSGS | FALSE | TRUE | FALSE | 23.53 |
| P20930 | 3328 | BDSBHWGSSGSQ | FALSE | TRUE | FALSE | 19.8  |
| P20930 | 3369 | QESABDBSGGBS | FALSE | TRUE | FALSE | 14.61 |
| P20930 | 3370 | ESABDBSGGBSG | FALSE | TRUE | FALSE | 15.06 |
| P20930 | 3371 | SABDBSGGBSGB | FALSE | TRUE | FALSE | 17.61 |
| P20930 | 3372 | ABDBSGGBSGBS | FALSE | TRUE | FALSE | 25.05 |
| P20930 | 3373 | BDBSGGBSGBSG | FALSE | TRUE | FALSE | 24.63 |
| P20930 | 3374 | DBSGGBSGBSGS | FALSE | TRUE | FALSE | 26.94 |
| P20930 | 3375 | BSGGBSGBSGSF | FALSE | TRUE | FALSE | 41.63 |
| P20930 | 3376 | SGGBSGBSGSFL | FALSE | TRUE | FALSE | 35.91 |
| P20930 | 3377 | GGBSGBSGSFLY | FALSE | TRUE | FALSE | 18.08 |
| P20930 | 3378 | GBSGBSGSFLYQ | FALSE | TRUE | FALSE | 18.51 |
| P20930 | 3393 | HEQSESAHGBTB | FALSE | TRUE | FALSE | 11.77 |
| P20930 | 3395 | QSESAHGBTBTS | FALSE | TRUE | FALSE | 14.83 |
| P20930 | 3396 | SESAHGBTBTST | FALSE | TRUE | FALSE | 15.14 |
| P20930 | 3397 | ESAHGBTBTSTG | FALSE | TRUE | FALSE | 15.17 |
| P20930 | 3398 | SAHGBTBTSTGB | FALSE | TRUE | FALSE | 32.43 |
| P20930 | 3399 | AHGBTBTSTGGB | FALSE | TRUE | FALSE | 23.5  |
| P20930 | 3400 | HGBTBTSTGBBQ | FALSE | TRUE | FALSE | 41.6  |
| P20930 | 3401 | GBTBTSTGBBQG | FALSE | TRUE | FALSE | 52.76 |
| P20930 | 3402 | BTBTSTGBBQGS | FALSE | TRUE | FALSE | 56.16 |
| P20930 | 3403 | TBTSTGBBQGSH | FALSE | TRUE | FALSE | 42.41 |
| P20930 | 3404 | BTSTGBBQGSHH | FALSE | TRUE | FALSE | 40.42 |
| P20930 | 3405 | TSTGBBQGSHHE | FALSE | TRUE | FALSE | 43.38 |
| P20930 | 3406 | STGBBQGSHHEQ | FALSE | TRUE | FALSE | 46.76 |
| P20930 | 3407 | TGBBQGSHHEQA | FALSE | TRUE | FALSE | 12.84 |
| P20930 | 3408 | GBBQGSHHEQAB | FALSE | TRUE | FALSE | 35.01 |
| P20930 | 3409 | BBQGSHHEQABD | FALSE | TRUE | FALSE | 38.03 |
| P20930 | 3410 | BQGSHHEQABDS | FALSE | TRUE | FALSE | 24.52 |
| P20930 | 3414 | HHEQABDSSBHS | FALSE | TRUE | FALSE | 13.46 |
| P20930 | 3415 | HEQABDSSBHSA | FALSE | TRUE | FALSE | 14.45 |
| P20930 | 3416 | EQABDSSBHSAS | FALSE | TRUE | FALSE | 10.7  |
| P20930 | 3417 | QABDSSBHSASQ | FALSE | TRUE | FALSE | 23.23 |
| P20930 | 3418 | ABDSSBHSASQE | FALSE | TRUE | FALSE | 24.13 |
| P20930 | 3419 | BDSSBHSASQEG | FALSE | TRUE | FALSE | 21.7  |
| P20930 | 3420 | DSSBHSASQEGQ | FALSE | TRUE | FALSE | 12.34 |
| P20930 | 3421 | SSBHSASQEGQD | FALSE | TRUE | FALSE | 13.93 |
| P20930 | 3422 | SBHSASQEGQDT | FALSE | TRUE | FALSE | 12.61 |
| P20930 | 3429 | EGQDTIBGHPGS | FALSE | TRUE | FALSE | 13.01 |

|        |      |              |       |      |       |       |
|--------|------|--------------|-------|------|-------|-------|
| P20930 | 3430 | GQDTIBGHPGSS | FALSE | TRUE | FALSE | 18.34 |
| P20930 | 3431 | QDTIBGHPGSSB | FALSE | TRUE | FALSE | 26.41 |
| P20930 | 3432 | DTIBGHPGSSBB | FALSE | TRUE | FALSE | 38.3  |
| P20930 | 3433 | TIBGHPGSSBBG | FALSE | TRUE | FALSE | 37.44 |
| P20930 | 3434 | IBGHPGSSBBGB | FALSE | TRUE | FALSE | 12.02 |
| P20930 | 3435 | BGHPGSSBBGBQ | FALSE | TRUE | FALSE | 48.69 |
| P20930 | 3436 | GHPGSSBBGBQG | FALSE | TRUE | FALSE | 31.9  |
| P20930 | 3437 | HPGSSBBGBQGS | FALSE | TRUE | FALSE | 63.2  |
| P20930 | 3438 | PGSSBBGBQGSH | FALSE | TRUE | FALSE | 44.28 |
| P20930 | 3439 | GSSBBGBQGSHY | FALSE | TRUE | FALSE | 44.92 |
| P20930 | 3440 | SSBBGBQGSHYE | FALSE | TRUE | FALSE | 66.4  |
| P20930 | 3441 | SBBGBQGSHYEQ | FALSE | TRUE | FALSE | 63.37 |
| P20930 | 3442 | BBGBQGSHYEQS | FALSE | TRUE | FALSE | 59.18 |
| P20930 | 3443 | BGBQGSHYEQSV | FALSE | TRUE | FALSE | 76.54 |
| P20930 | 3444 | GBQGSHYEQSVD | FALSE | TRUE | FALSE | 37.35 |
| P20930 | 3445 | BQGSHYEQSVDB | FALSE | TRUE | FALSE | 11.61 |
| P20930 | 3466 | HTTSQGBSDASB | FALSE | TRUE | FALSE | 14.85 |
| P20930 | 3467 | TTSQGBSDASBG | FALSE | TRUE | FALSE | 23.27 |
| P20930 | 3468 | TSQGBSDASBGQ | FALSE | TRUE | FALSE | 33.06 |
| P20930 | 3469 | SQGBSDASBGQS | FALSE | TRUE | FALSE | 30.94 |
| P20930 | 3470 | QGBSDASBGQSG | FALSE | TRUE | FALSE | 37.33 |
| P20930 | 3471 | GBSDASBGQSGS | FALSE | TRUE | FALSE | 36.13 |
| P20930 | 3472 | BSDASBGQSGSB | FALSE | TRUE | FALSE | 35.8  |
| P20930 | 3473 | SDASBGQSGSBS | FALSE | TRUE | FALSE | 25.54 |
| P20930 | 3474 | DASBGQSGSBSA | FALSE | TRUE | FALSE | 25.83 |
| P20930 | 3475 | ASBGQSGSBSAS | FALSE | TRUE | FALSE | 26.8  |
| P20930 | 3476 | SBGQSGSBSASB | FALSE | TRUE | FALSE | 38.88 |
| P20930 | 3477 | BGQSGSBSASBQ | FALSE | TRUE | FALSE | 68.78 |
| P20930 | 3478 | GQSGSBSASBQT | FALSE | TRUE | FALSE | 53.89 |
| P20930 | 3479 | QSGSBSASBQTB | FALSE | TRUE | FALSE | 62.43 |
| P20930 | 3480 | SGSBSASBQTBN | FALSE | TRUE | FALSE | 69.99 |
| P20930 | 3481 | GSBSASBQTBND | FALSE | TRUE | FALSE | 54.86 |
| P20930 | 3482 | SBSASBQTBNDE | FALSE | TRUE | FALSE | 62.9  |
| P20930 | 3483 | BSASBQTBNDEQ | FALSE | TRUE | FALSE | 64.9  |
| P20930 | 3484 | SASBQTBNDEQS | FALSE | TRUE | FALSE | 43.18 |
| P20930 | 3485 | ASBQTBNDEQSG | FALSE | TRUE | FALSE | 48.46 |
| P20930 | 3486 | SBQTBNDEQSGD | FALSE | TRUE | FALSE | 42.53 |
| P20930 | 3487 | BQTBNDEQSGDG | FALSE | TRUE | FALSE | 25.61 |
| P20930 | 3488 | QTBNDEQSGDGS | FALSE | TRUE | FALSE | 13.45 |
| P20930 | 3489 | TBNDEQSGDGSB | FALSE | TRUE | FALSE | 11.57 |
| P20930 | 3490 | BNDEQSGDGSBH | FALSE | TRUE | FALSE | 12.27 |
| P20930 | 3492 | DEQSGDGSBHSW | FALSE | TRUE | FALSE | 12.19 |
| P20930 | 3493 | EQSGDGSBHSWS | FALSE | TRUE | FALSE | 19.28 |
| P20930 | 3494 | QSGDGSBHSWSH | FALSE | TRUE | FALSE | 16.35 |
| P20930 | 3495 | SGDGSBHSWSHH | FALSE | TRUE | FALSE | 14.97 |
| P20930 | 3496 | GDGSBHSWSHHH | FALSE | TRUE | FALSE | 13.04 |
| P20930 | 3497 | DGSBHSWSHHHE | FALSE | TRUE | FALSE | 16.41 |
| P20930 | 3498 | GSBHSWSHHHEA | FALSE | TRUE | FALSE | 12.76 |
| P20930 | 3511 | TQADSSBHSQSG | FALSE | TRUE | FALSE | 10.4  |
| P20930 | 3512 | QADSSBHSQSGQ | FALSE | TRUE | FALSE | 13.43 |
| P20930 | 3513 | ADSSBHSQSGQG | FALSE | TRUE | FALSE | 10.11 |
| P20930 | 3514 | DSSBHSQSGQGQ | FALSE | TRUE | FALSE | 15.16 |



|        |      |              |       |      |       |       |
|--------|------|--------------|-------|------|-------|-------|
| P20930 | 3515 | SSBHSQSGQGQS | FALSE | TRUE | FALSE | 22.47 |
| P20930 | 3516 | SBHSQSGQGQSA | FALSE | TRUE | FALSE | 10.94 |
| P20930 | 3522 | GQQQSAGPBTSB | FALSE | TRUE | FALSE | 15.39 |
| P20930 | 3523 | QQQSAGPBTSBN | FALSE | TRUE | FALSE | 31.7  |
| P20930 | 3524 | GQSAGPBTSBNQ | FALSE | TRUE | FALSE | 30.77 |
| P20930 | 3525 | QSAGPBTSBNQG | FALSE | TRUE | FALSE | 24.67 |
| P20930 | 3526 | SAGPBTSBNQGS | FALSE | TRUE | FALSE | 34.2  |
| P20930 | 3527 | AGPBTSBNQGSS | FALSE | TRUE | FALSE | 37.25 |
| P20930 | 3528 | GPBTSBNQGSSV | FALSE | TRUE | FALSE | 30.61 |
| P20930 | 3529 | PBTSBNQGSSVS | FALSE | TRUE | FALSE | 27.82 |
| P20930 | 3530 | BTSBNQGSSVSQ | FALSE | TRUE | FALSE | 36.34 |
| P20930 | 3531 | TSBNQGSSVSQD | FALSE | TRUE | FALSE | 14.41 |
| P20930 | 3550 | EDSEBWGSASB  | FALSE | TRUE | FALSE | 12.59 |
| P20930 | 3551 | DSEBWGSASBN  | FALSE | TRUE | FALSE | 19.47 |
| P20930 | 3552 | SEBWGSASBNH  | FALSE | TRUE | FALSE | 19.19 |
| P20930 | 3553 | EBWGSASBNHB  | FALSE | TRUE | FALSE | 24.92 |
| P20930 | 3554 | BWGSASBNHBG  | FALSE | TRUE | FALSE | 30.84 |
| P20930 | 3555 | WGSASBNHBGS  | FALSE | TRUE | FALSE | 34.63 |
| P20930 | 3556 | SGSASBNHBGSA | FALSE | TRUE | FALSE | 29.68 |
| P20930 | 3557 | GSASBNHBGSAQ | FALSE | TRUE | FALSE | 37.18 |
| P20930 | 3558 | SASBNHBGSAQE | FALSE | TRUE | FALSE | 60.9  |
| P20930 | 3559 | ASBNHBGSAQEQ | FALSE | TRUE | FALSE | 52.99 |
| P20930 | 3560 | SBNHBGSAQEQS | FALSE | TRUE | FALSE | 48.36 |
| P20930 | 3561 | BNHBGSAQEQSB | FALSE | TRUE | FALSE | 37.45 |
| P20930 | 3562 | NHBGSAQEQSBD | FALSE | TRUE | FALSE | 14.73 |
| P20930 | 3563 | HBGSAQEQSBDG | FALSE | TRUE | FALSE | 32.54 |
| P20930 | 3564 | BGSAQEQSBDGS | FALSE | TRUE | FALSE | 16.61 |
| P20930 | 3566 | SAQEQSBDGSBH | FALSE | TRUE | FALSE | 18.22 |
| P20930 | 3567 | AQEQSBDGSBHP | FALSE | TRUE | FALSE | 14.7  |
| P20930 | 3568 | QEQSBDGSBHPT | FALSE | TRUE | FALSE | 19.2  |
| P20930 | 3569 | EQSBDGSBHPTS | FALSE | TRUE | FALSE | 19.63 |
| P20930 | 3570 | QSBDGSBHPTSH | FALSE | TRUE | FALSE | 31.31 |
| P20930 | 3571 | SBDGSBHPTSHH | FALSE | TRUE | FALSE | 25.18 |
| P20930 | 3572 | BDGSBHPTSHHE | FALSE | TRUE | FALSE | 29.29 |
| P20930 | 3573 | DGSBHPTSHHED | FALSE | TRUE | FALSE | 15.92 |
| P20930 | 3574 | GSBHPTSHHEDB | FALSE | TRUE | FALSE | 17.51 |
| P20930 | 3575 | SBHPTSHHEDBA | FALSE | TRUE | FALSE | 14.5  |
| P20930 | 3576 | BHPTSHHEDBAG | FALSE | TRUE | FALSE | 15.4  |
| P20930 | 3577 | HPTSHHEDBAGH | FALSE | TRUE | FALSE | 12.52 |
| P20930 | 3582 | HEDBAGHGHSAE | FALSE | TRUE | FALSE | 11.95 |
| P20930 | 3585 | BAGHGHSAESSB | FALSE | TRUE | FALSE | 14.79 |
| P20930 | 3586 | AGHGHSAESSBQ | FALSE | TRUE | FALSE | 12.62 |
| P20930 | 3587 | GHGHSAESSBQS | FALSE | TRUE | FALSE | 11.57 |
| P20930 | 3588 | HGHSAESSBQSG | FALSE | TRUE | FALSE | 11.72 |
| P20930 | 3589 | GHSAESSBQSGT | FALSE | TRUE | FALSE | 12.09 |
| P20930 | 3590 | HSAESSBQSGTH | FALSE | TRUE | FALSE | 14.09 |
| P20930 | 3591 | SAESSBQSGTHH | FALSE | TRUE | FALSE | 15.91 |
| P20930 | 3592 | AESSBQSGTHHA | FALSE | TRUE | FALSE | 13.75 |
| P20930 | 3593 | ESSBQSGTHHAE | FALSE | TRUE | FALSE | 11.15 |
| P20930 | 3594 | SSBQSGTHHAEN | FALSE | TRUE | FALSE | 28.86 |
| P20930 | 3595 | SBQSGTHHAENS | FALSE | TRUE | FALSE | 27.73 |
| P20930 | 3615 | HEQABSSAGEBH | FALSE | TRUE | FALSE | 13.69 |

|        |      |               |       |      |       |       |
|--------|------|---------------|-------|------|-------|-------|
| P20930 | 3616 | EQABSSAGEBHG  | FALSE | TRUE | FALSE | 15.63 |
| P20930 | 3617 | QABSSAGEBHGS  | FALSE | TRUE | FALSE | 26.96 |
| P20930 | 3618 | ABSSAGEBHGSH  | FALSE | TRUE | FALSE | 25.31 |
| P20930 | 3619 | BSSAGEBHGS HH | FALSE | TRUE | FALSE | 19.42 |
| P20930 | 3620 | SSAGEBHGS HHQ | FALSE | TRUE | FALSE | 19.1  |
| P20930 | 3621 | SAGEBHGS HHQQ | FALSE | TRUE | FALSE | 21.23 |
| P20930 | 3622 | AGEBHGS HHQQS | FALSE | TRUE | FALSE | 23.85 |
| P20930 | 3623 | GEBHGS HHQQSA | FALSE | TRUE | FALSE | 21.02 |
| P20930 | 3624 | EBHGS HHQQSAD | FALSE | TRUE | FALSE | 13.81 |
| P20930 | 3625 | BHGS HHQQSADS | FALSE | TRUE | FALSE | 12.18 |
| P20930 | 3630 | HQQSADSSB HSG | FALSE | TRUE | FALSE | 10.27 |
| P20930 | 3646 | QASSAVBDSGHB  | FALSE | TRUE | FALSE | 13.54 |
| P20930 | 3647 | ASSAVBDSGHBG  | FALSE | TRUE | FALSE | 19.79 |
| P20930 | 3648 | SSAVBDSGHBGS  | FALSE | TRUE | FALSE | 33.54 |
| P20930 | 3649 | SAVBDSGHBGSS  | FALSE | TRUE | FALSE | 35.46 |
| P20930 | 3650 | AVBDSGHBGSSG  | FALSE | TRUE | FALSE | 30.96 |
| P20930 | 3651 | VBDSGHBGSSGS  | FALSE | TRUE | FALSE | 33.38 |
| P20930 | 3652 | BDSGHBGSSGSQ  | FALSE | TRUE | FALSE | 28.93 |
| P20930 | 3654 | SGHBGSSGSQAS  | FALSE | TRUE | FALSE | 11.9  |
| P20930 | 3655 | GHBGSSGSQASD  | FALSE | TRUE | FALSE | 12.85 |
| P20930 | 3656 | HBGSSGSQASDS  | FALSE | TRUE | FALSE | 14.88 |
| P20930 | 3686 | GPHQQSHQESTB  | FALSE | TRUE | FALSE | 10.2  |
| P20930 | 3688 | HQQSHQESTBGB  | FALSE | TRUE | FALSE | 16.88 |
| P20930 | 3689 | QQSHQESTBGBS  | FALSE | TRUE | FALSE | 24.3  |
| P20930 | 3690 | QSHQESTBGBSA  | FALSE | TRUE | FALSE | 22.69 |
| P20930 | 3691 | SHQESTBGBSAG  | FALSE | TRUE | FALSE | 22.27 |
| P20930 | 3692 | HQESTBGBSAGB  | FALSE | TRUE | FALSE | 19.25 |
| P20930 | 3693 | QESTBGBSAGBS  | FALSE | TRUE | FALSE | 32.94 |
| P20930 | 3694 | ESTBGBSAGBSG  | FALSE | TRUE | FALSE | 31.83 |
| P20930 | 3695 | STBGBSAGBSGB  | FALSE | TRUE | FALSE | 30.27 |
| P20930 | 3696 | TBGBSAGBSGBS  | FALSE | TRUE | FALSE | 49.45 |
| P20930 | 3697 | BGBSAGBSGBSG  | FALSE | TRUE | FALSE | 39.54 |
| P20930 | 3698 | GBSAGBSGBSGS  | FALSE | TRUE | FALSE | 37.84 |
| P20930 | 3699 | BSAGBSGBSGSF  | FALSE | TRUE | FALSE | 44.05 |
| P20930 | 3700 | SAGBSGBSGSFL  | FALSE | TRUE | FALSE | 31.53 |
| P20930 | 3701 | AGBSGBSGSFLY  | FALSE | TRUE | FALSE | 16.09 |
| P20930 | 3702 | GBSGBSGSFLYQ  | FALSE | TRUE | FALSE | 18.51 |
| P20930 | 3719 | QSESAHGBAGPS  | FALSE | TRUE | FALSE | 11.91 |
| P20930 | 3720 | SESAHGBAGPST  | FALSE | TRUE | FALSE | 12.56 |
| P20930 | 3721 | ESAHGBAGPSTG  | FALSE | TRUE | FALSE | 14.6  |
| P20930 | 3722 | SAHGBAGPSTGG  | FALSE | TRUE | FALSE | 15.22 |
| P20930 | 3723 | AHGBAGPSTGGB  | FALSE | TRUE | FALSE | 24.83 |
| P20930 | 3724 | HGBAGPSTGGBQ  | FALSE | TRUE | FALSE | 42.11 |
| P20930 | 3725 | GBAGPSTGGBQG  | FALSE | TRUE | FALSE | 31.95 |
| P20930 | 3726 | BAGPSTGGBQGS  | FALSE | TRUE | FALSE | 32.22 |
| P20930 | 3727 | AGPSTGGBQGSB  | FALSE | TRUE | FALSE | 43.92 |
| P20930 | 3728 | GPSTGGBQGSBH  | FALSE | TRUE | FALSE | 39.34 |
| P20930 | 3729 | PSTGGBQGSBHE  | FALSE | TRUE | FALSE | 37.79 |
| P20930 | 3730 | STGGBQGSBHEQ  | FALSE | TRUE | FALSE | 58.76 |
| P20930 | 3731 | TGGBQGSBHEQA  | FALSE | TRUE | FALSE | 16.93 |
| P20930 | 3732 | GGBQGSBHEQAB  | FALSE | TRUE | FALSE | 48.6  |
| P20930 | 3733 | GBQGSBHEQABD  | FALSE | TRUE | FALSE | 47.84 |

|        |      |               |       |      |       |       |
|--------|------|---------------|-------|------|-------|-------|
| P20930 | 3734 | BQGSBHEQABDS  | FALSE | TRUE | FALSE | 56.78 |
| P20930 | 3735 | QGSBHEQABDSS  | FALSE | TRUE | FALSE | 23.93 |
| P20930 | 3736 | GSBHEQABDSSB  | FALSE | TRUE | FALSE | 26.36 |
| P20930 | 3737 | SBHEQABDSSBH  | FALSE | TRUE | FALSE | 26.94 |
| P20930 | 3738 | BHEQABDSSBHS  | FALSE | TRUE | FALSE | 24.78 |
| P20930 | 3739 | HEQABDSSBHSA  | FALSE | TRUE | FALSE | 14.45 |
| P20930 | 3740 | EQABDSSBHSAS  | FALSE | TRUE | FALSE | 10.7  |
| P20930 | 3741 | QABDSSBHSASQ  | FALSE | TRUE | FALSE | 23.23 |
| P20930 | 3742 | ABDSSBHSASQE  | FALSE | TRUE | FALSE | 24.13 |
| P20930 | 3743 | BDSSBHSASQEG  | FALSE | TRUE | FALSE | 21.7  |
| P20930 | 3744 | DSSBHSASQEGQ  | FALSE | TRUE | FALSE | 12.34 |
| P20930 | 3745 | SSBHSASQEGQD  | FALSE | TRUE | FALSE | 13.93 |
| P20930 | 3746 | SBHSASQEGQDT  | FALSE | TRUE | FALSE | 12.61 |
| P20930 | 3753 | EGQDTIBGHPGS  | FALSE | TRUE | FALSE | 13.01 |
| P20930 | 3754 | GQDTIBGHPGSB  | FALSE | TRUE | FALSE | 27.61 |
| P20930 | 3755 | QDTIBGHPGSBB  | FALSE | TRUE | FALSE | 24.23 |
| P20930 | 3756 | DTIBGHPGSBBG  | FALSE | TRUE | FALSE | 27.14 |
| P20930 | 3757 | TIBGHPGSBBGG  | FALSE | TRUE | FALSE | 13.34 |
| P20930 | 3758 | IBGHPGSBBGGB  | FALSE | TRUE | FALSE | 10.36 |
| P20930 | 3759 | BGHPGSBBGGBQ  | FALSE | TRUE | FALSE | 29.43 |
| P20930 | 3760 | GHPGSBBGGBQC  | FALSE | TRUE | FALSE | 26.13 |
| P20930 | 3761 | HPGSBBGGBQGS  | FALSE | TRUE | FALSE | 49.37 |
| P20930 | 3762 | PGSBBGGBQGSY  | FALSE | TRUE | FALSE | 39.17 |
| P20930 | 3763 | GSBBGGBQGSYH  | FALSE | TRUE | FALSE | 47.43 |
| P20930 | 3764 | SBBGGBQGSYHE  | FALSE | TRUE | FALSE | 64.06 |
| P20930 | 3765 | BBGGBQGSYHEQ  | FALSE | TRUE | FALSE | 48.62 |
| P20930 | 3766 | BGGGBQGSYHEQS | FALSE | TRUE | FALSE | 63.89 |
| P20930 | 3767 | GGBQGSYHEQSV  | FALSE | TRUE | FALSE | 55.58 |
| P20930 | 3768 | GBQGSYHEQSVD  | FALSE | TRUE | FALSE | 40.92 |
| P20930 | 3769 | BQGSYHEQSVDB  | FALSE | TRUE | FALSE | 10.62 |
| P20930 | 3793 | SQGBSDASHGQS  | FALSE | TRUE | FALSE | 10.89 |
| P20930 | 3794 | QGBSDASHGQSG  | FALSE | TRUE | FALSE | 13.73 |
| P20930 | 3795 | GBSDASHGQSGS  | FALSE | TRUE | FALSE | 12.39 |
| P20930 | 3796 | BSDASHGQSGSB  | FALSE | TRUE | FALSE | 15.26 |
| P20930 | 3800 | SHGQSGSBSASB  | FALSE | TRUE | FALSE | 24.59 |
| P20930 | 3801 | HGQSGSBSASBE  | FALSE | TRUE | FALSE | 30.46 |
| P20930 | 3802 | GQSGSBSASBET  | FALSE | TRUE | FALSE | 29.38 |
| P20930 | 3803 | QSGSBSASBETB  | FALSE | TRUE | FALSE | 34.8  |
| P20930 | 3804 | SGSBSASBETBN  | FALSE | TRUE | FALSE | 54.89 |
| P20930 | 3805 | GSBSASBETBNE  | FALSE | TRUE | FALSE | 38.72 |
| P20930 | 3806 | SBSASBETBNEE  | FALSE | TRUE | FALSE | 34.35 |
| P20930 | 3807 | BSASBETBNEEQ  | FALSE | TRUE | FALSE | 35.08 |
| P20930 | 3808 | SASBETBNEEQS  | FALSE | TRUE | FALSE | 27.1  |
| P20930 | 3809 | ASBETBNEEQSG  | FALSE | TRUE | FALSE | 29.69 |
| P20930 | 3810 | SBETBNEEQSGD  | FALSE | TRUE | FALSE | 31.59 |
| P20930 | 3811 | BETBNEEQSGDG  | FALSE | TRUE | FALSE | 20.35 |
| P20930 | 3813 | TBNEEQSGDGSB  | FALSE | TRUE | FALSE | 10.67 |
| P20930 | 3814 | BNEEQSGDGSBH  | FALSE | TRUE | FALSE | 15.26 |
| P20930 | 3817 | EQSGDGSBHSGS  | FALSE | TRUE | FALSE | 11.05 |
| P20930 | 3818 | QSGDGSBHSGSB  | FALSE | TRUE | FALSE | 29.17 |
| P20930 | 3819 | SGDGSBHSGSBH  | FALSE | TRUE | FALSE | 23.67 |
| P20930 | 3820 | GDGSBHSGSBHH  | FALSE | TRUE | FALSE | 16.38 |

|        |      |              |       |      |       |       |
|--------|------|--------------|-------|------|-------|-------|
| P20930 | 3821 | DGSBHSGSBHHE | FALSE | TRUE | FALSE | 21.27 |
| P20930 | 3822 | GSBHSGSBHHEA | FALSE | TRUE | FALSE | 17.32 |
| P20930 | 3823 | SBHSGSBHHEAS | FALSE | TRUE | FALSE | 19.24 |
| P20930 | 3824 | BHSGSBHHEAST | FALSE | TRUE | FALSE | 18.35 |
| P20930 | 3825 | HSGSBHHEASTQ | FALSE | TRUE | FALSE | 17.41 |
| P20930 | 3827 | GSBHHEASTQAD | FALSE | TRUE | FALSE | 13.41 |
| P20930 | 3835 | TQADSSBHSQSG | FALSE | TRUE | FALSE | 10.4  |
| P20930 | 3836 | QADSSBHSQSGQ | FALSE | TRUE | FALSE | 13.43 |
| P20930 | 3837 | ADSSBHSQSGQG | FALSE | TRUE | FALSE | 10.11 |
| P20930 | 3838 | DSSBHSQSGQGE | FALSE | TRUE | FALSE | 15.07 |
| P20930 | 3839 | SSBHSQSGQGGS | FALSE | TRUE | FALSE | 14.85 |
| P20930 | 3840 | SBHSQSGQGESA | FALSE | TRUE | FALSE | 11.45 |
| P20930 | 3844 | QSGQGESAGSBB | FALSE | TRUE | FALSE | 13.19 |
| P20930 | 3845 | SGQGESAGSBBS | FALSE | TRUE | FALSE | 10.48 |
| P20930 | 3846 | GQGESAGSBBSB | FALSE | TRUE | FALSE | 15.07 |
| P20930 | 3847 | QGESAGSBBSBB | FALSE | TRUE | FALSE | 10.89 |
| P20930 | 3848 | GESAGSBBSBBQ | FALSE | TRUE | FALSE | 30.23 |
| P20930 | 3849 | ESAGSBBSBBQG | FALSE | TRUE | FALSE | 32.71 |
| P20930 | 3850 | SAGSBBSBBQGS | FALSE | TRUE | FALSE | 31.12 |
| P20930 | 3851 | AGSBBSBBQGSS | FALSE | TRUE | FALSE | 44.08 |
| P20930 | 3852 | GSBBSBBQGSSV | FALSE | TRUE | FALSE | 54.22 |
| P20930 | 3853 | SBBSBBQGSSVS | FALSE | TRUE | FALSE | 68.88 |
| P20930 | 3854 | BBSBBQGSSVSQ | FALSE | TRUE | FALSE | 78.46 |
| P20930 | 3855 | BSBBQGSSVSQD | FALSE | TRUE | FALSE | 81.76 |
| P20930 | 3856 | SBBQGSSVSQDS | FALSE | TRUE | FALSE | 59    |
| P20930 | 3857 | BBQGSSVSQDSD | FALSE | TRUE | FALSE | 30.39 |
| P20930 | 3875 | DSEBBSESASBN | FALSE | TRUE | FALSE | 13.77 |
| P20930 | 3876 | SEBBSESASBNH | FALSE | TRUE | FALSE | 22.46 |
| P20930 | 3877 | EBBSESASBNHH | FALSE | TRUE | FALSE | 14.91 |
| P20930 | 3878 | BBSESASBNHHG | FALSE | TRUE | FALSE | 19.04 |
| P20930 | 3879 | BSESASBNHHGS | FALSE | TRUE | FALSE | 12.91 |
| P20930 | 3881 | ESASBNHHGSSB | FALSE | TRUE | FALSE | 14.4  |
| P20930 | 3882 | SASBNHHGSSBE | FALSE | TRUE | FALSE | 38.31 |
| P20930 | 3883 | ASBNHHGSSBEQ | FALSE | TRUE | FALSE | 25.79 |
| P20930 | 3884 | SBNHHGSSBEQS | FALSE | TRUE | FALSE | 22.22 |
| P20930 | 3885 | BNHHGSSBEQSB | FALSE | TRUE | FALSE | 26.35 |
| P20930 | 3886 | NHHGSSBEQSBD | FALSE | TRUE | FALSE | 12.13 |
| P20930 | 3887 | HHGSSBEQSBDG | FALSE | TRUE | FALSE | 17.57 |
| P20930 | 3888 | HGSSBEQSBDGS | FALSE | TRUE | FALSE | 21.33 |
| P20930 | 3889 | GSSBEQSBDGSB | FALSE | TRUE | FALSE | 33.16 |
| P20930 | 3890 | SSBEQSBDGSBH | FALSE | TRUE | FALSE | 47.51 |
| P20930 | 3891 | SBEQSBDGSBHP | FALSE | TRUE | FALSE | 40.35 |
| P20930 | 3892 | BEQSBDGSBHPG | FALSE | TRUE | FALSE | 39.78 |
| P20930 | 3893 | EQSBDGSBHPGS | FALSE | TRUE | FALSE | 21.9  |
| P20930 | 3894 | QSBDGSBHPGSS | FALSE | TRUE | FALSE | 39.46 |
| P20930 | 3895 | SBDGSBHPGSSH | FALSE | TRUE | FALSE | 34.02 |
| P20930 | 3896 | BDGSBHPGSSHB | FALSE | TRUE | FALSE | 37.18 |
| P20930 | 3897 | DGSBHPGSSHBD | FALSE | TRUE | FALSE | 15.63 |
| P20930 | 3898 | GSBHPGSSHBDT | FALSE | TRUE | FALSE | 18    |
| P20930 | 3899 | SBHPGSSHBDTA | FALSE | TRUE | FALSE | 17.36 |
| P20930 | 3900 | BHPGSSHBDTAS | FALSE | TRUE | FALSE | 11.96 |
| P20930 | 3937 | DSAYHSGIQSBG | FALSE | TRUE | FALSE | 16.96 |

|        |      |               |       |      |       |       |
|--------|------|---------------|-------|------|-------|-------|
| P20930 | 3938 | SAYHSGIQSBGS  | FALSE | TRUE | FALSE | 47.23 |
| P20930 | 3939 | AYHSGIQSBGSP  | FALSE | TRUE | FALSE | 39.75 |
| P20930 | 3940 | YHSGIQSBGSPH  | FALSE | TRUE | FALSE | 28.73 |
| P20930 | 3941 | HSGIQSBGSPHS  | FALSE | TRUE | FALSE | 38.64 |
| P20930 | 3942 | SGIQSBGSPHSS  | FALSE | TRUE | FALSE | 58.14 |
| P20930 | 3943 | GIQSBGSPHSSS  | FALSE | TRUE | FALSE | 28.05 |
| P20930 | 3944 | IQSBGSPHSSSS  | FALSE | TRUE | FALSE | 43.51 |
| P20930 | 3945 | QSBGSPHSSSSY  | FALSE | TRUE | FALSE | 25.32 |
| P20930 | 3946 | SBGSPHSSSSYH  | FALSE | TRUE | FALSE | 11.54 |
| P20930 | 3964 | EBQKGQSGLVWB  | FALSE | TRUE | FALSE | 14.76 |
| P20930 | 3968 | GQSGLVWBHGSI  | FALSE | TRUE | FALSE | 11.42 |
| P20930 | 3969 | QSGLVWBHGSIY  | FALSE | TRUE | FALSE | 12.03 |
| P20930 | 3970 | SGLVWBHGSIYGS | FALSE | TRUE | FALSE | 15.31 |
| P20930 | 3972 | LVWBHGSIYGSAD | FALSE | TRUE | FALSE | 20.15 |
| P20930 | 3984 | YDYGESGFBHSQ  | FALSE | TRUE | FALSE | 10.4  |
| P20930 | 3985 | DYGESGFBHSQH  | FALSE | TRUE | FALSE | 15.13 |
| P20930 | 3986 | YGESGFBHSQH   | FALSE | TRUE | FALSE | 12.98 |
| P20930 | 3987 | GESGFBHSQHGS  | FALSE | TRUE | FALSE | 18.29 |
| P20930 | 3988 | ESGFBHSQHGSV  | FALSE | TRUE | FALSE | 14.01 |
| P20930 | 3989 | SGFBHSQHGSVS  | FALSE | TRUE | FALSE | 13.07 |
| P20930 | 4000 | SYNSNPVVFKEB  | FALSE | TRUE | FALSE | 10.22 |
| P20930 | 4003 | SNPVVFKEBSDI  | FALSE | TRUE | FALSE | 11.58 |
| P20930 | 4006 | VVFKEBSDICKA  | FALSE | TRUE | FALSE | 12.21 |
| P20930 | 4007 | VFKEBSDICKAS  | FALSE | TRUE | FALSE | 10.18 |
| P06396 | 21   | LSLPVBAATASB  | FALSE | TRUE | FALSE | 19.41 |
| P06396 | 22   | SLPVBAATASBG  | FALSE | TRUE | FALSE | 27.64 |
| P06396 | 23   | LPVBAATASBGA  | FALSE | TRUE | FALSE | 25.32 |
| P06396 | 24   | PVBAATASBGAS  | FALSE | TRUE | FALSE | 13.51 |
| P06396 | 25   | VBAATASBGASQ  | FALSE | TRUE | FALSE | 35.47 |
| P06396 | 26   | BAATASBGASQA  | FALSE | TRUE | FALSE | 14.18 |
| P06396 | 27   | AATASBGASQAG  | FALSE | TRUE | FALSE | 30.41 |
| P06396 | 28   | ATASBGASQAGA  | FALSE | TRUE | FALSE | 22.7  |
| P06396 | 29   | TASBGASQAGAP  | FALSE | TRUE | FALSE | 20.41 |
| P06396 | 30   | ASBGASQAGAPQ  | FALSE | TRUE | FALSE | 38.43 |
| P06396 | 31   | SBGASQAGAPQG  | FALSE | TRUE | FALSE | 22.37 |
| P06396 | 32   | BGASQAGAPQGB  | FALSE | TRUE | FALSE | 30.92 |
| P06396 | 100  | TVQLBNGNLQYD  | FALSE | TRUE | FALSE | 18.79 |
| P06396 | 101  | VQLBNGNLQYDL  | FALSE | TRUE | FALSE | 17.14 |
| P06396 | 102  | QLBNGNLQYDLH  | FALSE | TRUE | FALSE | 13.05 |
| P06396 | 134  | QLDDYLNGBAVQ  | FALSE | TRUE | FALSE | 12.6  |
| P06396 | 135  | LDDYLNGBAVQH  | FALSE | TRUE | FALSE | 11.06 |
| P06396 | 136  | DDYLNGBAVQHB  | FALSE | TRUE | FALSE | 23.67 |
| P06396 | 137  | DYLNGBAVQHBE  | FALSE | TRUE | FALSE | 42.85 |
| P06396 | 138  | YLNGBAVQHBEV  | FALSE | TRUE | FALSE | 59.79 |
| P06396 | 139  | LNGBAVQHBEVQ  | FALSE | TRUE | FALSE | 46.78 |
| P06396 | 140  | NGBAVQHBEVQG  | FALSE | TRUE | FALSE | 12.29 |
| P06396 | 141  | GBAVQHBEVQGF  | FALSE | TRUE | FALSE | 44.89 |
| P06396 | 142  | BAVQHBEVQGF   | FALSE | TRUE | FALSE | 34.55 |
| P06396 | 143  | AVQHBEVQGFES  | FALSE | TRUE | FALSE | 38    |
| P06396 | 144  | VQHBEVQGFESA  | FALSE | TRUE | FALSE | 14.6  |
| P06396 | 146  | HBEVQGFESATF  | FALSE | TRUE | FALSE | 13.48 |
| P06396 | 187  | QBLFQVKGBBVV  | FALSE | TRUE | FALSE | 10.39 |

|        |     |               |       |      |       |       |
|--------|-----|---------------|-------|------|-------|-------|
| P06396 | 190 | FQVKGBBVVBAT  | FALSE | TRUE | FALSE | 13.17 |
| P06396 | 191 | QVKGBBVVBATE  | FALSE | TRUE | FALSE | 30.38 |
| P06396 | 192 | VKGBBVVBATEV  | FALSE | TRUE | FALSE | 28.69 |
| P06396 | 194 | GBBVVBATEVPV  | FALSE | TRUE | FALSE | 15.91 |
| P06396 | 195 | BBVVVBATEVPVS | FALSE | TRUE | FALSE | 22.83 |
| P06396 | 196 | BVVVBATEVPVSW | FALSE | TRUE | FALSE | 18.25 |
| P06396 | 228 | CGSNSNBYEBLK  | FALSE | TRUE | FALSE | 11.25 |
| P06396 | 230 | SNSNBYEBLKAT  | FALSE | TRUE | FALSE | 11.04 |
| P06396 | 231 | NSNBYEBLKATQ  | FALSE | TRUE | FALSE | 10.2  |
| P06396 | 232 | SNBYEBLKATQV  | FALSE | TRUE | FALSE | 12.76 |
| P06396 | 233 | NBYEBLKATQVS  | FALSE | TRUE | FALSE | 10.78 |
| P06396 | 244 | SKGIBDNEBSGB  | FALSE | TRUE | FALSE | 14.33 |
| P06396 | 245 | KGIBDNEBSGBA  | FALSE | TRUE | FALSE | 17.14 |
| P06396 | 247 | IBDNEBSGBABV  | FALSE | TRUE | FALSE | 25.14 |
| P06396 | 248 | BDNEBSGBABVH  | FALSE | TRUE | FALSE | 24.9  |
| P06396 | 249 | DNEBSGBABVHV  | FALSE | TRUE | FALSE | 23.58 |
| P06396 | 250 | NEBSGBABVHVS  | FALSE | TRUE | FALSE | 21.19 |
| P06396 | 251 | EBSGBABVHVSE  | FALSE | TRUE | FALSE | 30.19 |
| P06396 | 252 | BSGBABVHVSEE  | FALSE | TRUE | FALSE | 35.73 |
| P06396 | 253 | SGBABVHVSEEG  | FALSE | TRUE | FALSE | 28.98 |
| P06396 | 254 | GBABVHVSEEGT  | FALSE | TRUE | FALSE | 29.8  |
| P06396 | 255 | BABVHVSEEGTE  | FALSE | TRUE | FALSE | 14.42 |
| P06396 | 443 | GTGQKQIWBIEG  | FALSE | TRUE | FALSE | 10.63 |
| P06396 | 444 | TGQKQIWBIEGS  | FALSE | TRUE | FALSE | 10.36 |
| P06396 | 475 | IILYNYBHGGBQ  | FALSE | TRUE | FALSE | 13.05 |
| P06396 | 476 | ILYNYBHGGBQG  | FALSE | TRUE | FALSE | 24.49 |
| P06396 | 477 | LYNYBHGGBQQG  | FALSE | TRUE | FALSE | 33.59 |
| P06396 | 478 | YNYBHGGBQQGI  | FALSE | TRUE | FALSE | 36.16 |
| P06396 | 479 | NYBHGGBQQGII  | FALSE | TRUE | FALSE | 34.37 |
| P06396 | 480 | YBHGGBQQQIIY  | FALSE | TRUE | FALSE | 29.19 |
| P06396 | 481 | BHGGBQQQIIYN  | FALSE | TRUE | FALSE | 25.13 |
| P06396 | 482 | HGGBQQQIIYNW  | FALSE | TRUE | FALSE | 11.67 |
| P06396 | 483 | GGBQQQIIYNWQ  | FALSE | TRUE | FALSE | 23.42 |
| P06396 | 484 | GBQQQIIYNWQG  | FALSE | TRUE | FALSE | 22.68 |
| P06396 | 543 | PMIIYKGGTSBE  | FALSE | TRUE | FALSE | 16.9  |
| P06396 | 544 | MIIYKGGTSBEG  | FALSE | TRUE | FALSE | 17.4  |
| P06396 | 545 | IYKGGTSBEGG   | FALSE | TRUE | FALSE | 12.9  |
| P06396 | 546 | IYKGGTSBEGGQ  | FALSE | TRUE | FALSE | 21.22 |
| P06396 | 547 | YKGGTSBEGGQT  | FALSE | TRUE | FALSE | 29.44 |
| P06396 | 548 | KGGTSBEGGQTA  | FALSE | TRUE | FALSE | 16.99 |
| P06396 | 549 | GGTSBEGGQTAP  | FALSE | TRUE | FALSE | 21.4  |
| P06396 | 550 | GTSBEGGQTAPA  | FALSE | TRUE | FALSE | 21.5  |
| P06396 | 551 | TSBEGGQTAPAS  | FALSE | TRUE | FALSE | 20.78 |
| P06396 | 552 | SBEGGQTAPAST  | FALSE | TRUE | FALSE | 22.7  |
| P06396 | 553 | BEGGQTAPASTB  | FALSE | TRUE | FALSE | 17.75 |
| P06396 | 558 | TAPASTBLFQVB  | FALSE | TRUE | FALSE | 14.34 |
| P06396 | 559 | APASTBLFQVBA  | FALSE | TRUE | FALSE | 11.25 |
| P06396 | 560 | PASTBLFQVBAN  | FALSE | TRUE | FALSE | 11.6  |
| P06396 | 561 | ASTBLFQVBANS  | FALSE | TRUE | FALSE | 14.32 |
| P06396 | 562 | STBLFQVBANSA  | FALSE | TRUE | FALSE | 24.94 |
| P06396 | 563 | TBLFQVBANSAG  | FALSE | TRUE | FALSE | 21.42 |
| P06396 | 564 | BLFQVBANSAGA  | FALSE | TRUE | FALSE | 20.62 |

|        |     |              |       |      |       |       |
|--------|-----|--------------|-------|------|-------|-------|
| P06396 | 565 | LFQVBANSAGAT | FALSE | TRUE | FALSE | 22.75 |
| P06396 | 566 | FQVBANSAGATB | FALSE | TRUE | FALSE | 27.59 |
| P06396 | 567 | QVBANSAGATBA | FALSE | TRUE | FALSE | 21.05 |
| P06396 | 568 | VBANSAGATBAV | FALSE | TRUE | FALSE | 14.96 |
| P06396 | 569 | BANSAGATBAVE | FALSE | TRUE | FALSE | 11.74 |
| P06396 | 570 | ANSAGATBAVEV | FALSE | TRUE | FALSE | 10.27 |
| P06396 | 571 | NSAGATBAVEVL | FALSE | TRUE | FALSE | 10.64 |
| P06396 | 572 | SAGATBAVEVLP | FALSE | TRUE | FALSE | 10.62 |
| P06396 | 573 | AGATBAVEVLPK | FALSE | TRUE | FALSE | 21.35 |
| P06396 | 574 | GATBAVEVLPKA | FALSE | TRUE | FALSE | 17.16 |
| P06396 | 575 | ATBAVEVLPKAG | FALSE | TRUE | FALSE | 25.81 |
| P06396 | 576 | TBAVEVLPKAGA | FALSE | TRUE | FALSE | 12.21 |
| P06396 | 622 | LBVLBAQPVQVA | FALSE | TRUE | FALSE | 10.77 |
| P06396 | 623 | BVLBAQPVQVAE | FALSE | TRUE | FALSE | 21.07 |
| P06396 | 645 | LGGKAAYBTSPB | FALSE | TRUE | FALSE | 11.58 |
| P06396 | 730 | YIETDPANBDBB | FALSE | TRUE | FALSE | 11.21 |
| P06396 | 731 | IETDPANBDBBT | FALSE | TRUE | FALSE | 10.63 |
| P06396 | 733 | TDPANBDBBTPI | FALSE | TRUE | FALSE | 12.68 |
| P06396 | 734 | DPANBDBBTPI  | FALSE | TRUE | FALSE | 13.79 |
| P06396 | 735 | PANBDBBTPIV  | FALSE | TRUE | FALSE | 10.29 |
| P06396 | 736 | ANBDBBTPIVV  | FALSE | TRUE | FALSE | 14.57 |
| P04406 | 7   | GVNGFGBIGBLV | FALSE | TRUE | FALSE | 10.72 |
| P04406 | 8   | VNGFGBIGBLVT | FALSE | TRUE | FALSE | 15.34 |
| P04406 | 9   | NGFGBIGBLVTB | FALSE | TRUE | FALSE | 24.56 |
| P04406 | 10  | GFGBIGBLVTBA | FALSE | TRUE | FALSE | 37.41 |
| P04406 | 11  | FGBIGBLVTBAA | FALSE | TRUE | FALSE | 14.43 |
| P04406 | 12  | GBIGBLVTBAAF | FALSE | TRUE | FALSE | 23.55 |
| P04406 | 13  | BIGBLVTBAAFN | FALSE | TRUE | FALSE | 34.29 |
| P04406 | 14  | IGBLVTBAAFNS | FALSE | TRUE | FALSE | 45.06 |
| P04406 | 15  | GBLVTBAAFNSG | FALSE | TRUE | FALSE | 53.72 |
| P04406 | 16  | BLVTBAAFNSGK | FALSE | TRUE | FALSE | 22.54 |
| P04406 | 17  | LVTBAAFNSGKV | FALSE | TRUE | FALSE | 14.34 |
| P04406 | 18  | VTBAAFNSGKVD | FALSE | TRUE | FALSE | 43.27 |
| P04406 | 19  | TBAAFNSGKVDI | FALSE | TRUE | FALSE | 25.9  |
| P04406 | 189 | DGPGKLBWDGB  | FALSE | TRUE | FALSE | 18.57 |
| P04406 | 190 | GPSGKLBWDGBG | FALSE | TRUE | FALSE | 22.1  |
| P04406 | 191 | PSGKLBWDGBGA | FALSE | TRUE | FALSE | 18.44 |
| P04406 | 192 | SGKLBWDGBGAL | FALSE | TRUE | FALSE | 21.68 |
| P04406 | 193 | GKLBWDGBGALQ | FALSE | TRUE | FALSE | 29.06 |
| P04406 | 194 | KLWDGBGALQN  | FALSE | TRUE | FALSE | 35.52 |
| P04406 | 195 | LWBDGBGALQNI | FALSE | TRUE | FALSE | 27.22 |
| P04406 | 196 | WBDGBGALQNI  | FALSE | TRUE | FALSE | 25.11 |
| P04406 | 197 | BDGBGALQNIIP | FALSE | TRUE | FALSE | 24.01 |
| P04406 | 198 | DGBGALQNIIPA | FALSE | TRUE | FALSE | 22.46 |
| P04406 | 199 | GBGALQNIIPAS | FALSE | TRUE | FALSE | 17.33 |
| P04406 | 200 | BGALQNIIPAST | FALSE | TRUE | FALSE | 16.65 |
| P04406 | 312 | SWYDNEFGYSNB | FALSE | TRUE | FALSE | 10.08 |
| P04406 | 315 | DNEFGYSNBVVD | FALSE | TRUE | FALSE | 13.01 |
| P04406 | 316 | NEFGYSNBVVDL | FALSE | TRUE | FALSE | 12.77 |
| P04406 | 317 | EFGYSNBVVDLM | FALSE | TRUE | FALSE | 19.57 |
| P04406 | 318 | FGYSNBVVDLMA | FALSE | TRUE | FALSE | 11.1  |
| P04406 | 319 | GYSNBVVDLMAH | FALSE | TRUE | FALSE | 23.35 |

|        |     |               |       |      |       |       |
|--------|-----|---------------|-------|------|-------|-------|
| P04406 | 320 | YSNBVVDLMAHM  | FALSE | TRUE | FALSE | 16.56 |
| P00738 | 52  | CKNYYKLBTEGD  | FALSE | TRUE | FALSE | 10.82 |
| P00738 | 54  | NYYKLBTEGDGV  | FALSE | TRUE | FALSE | 10.76 |
| P00738 | 55  | YYKLBTEGDGVY  | FALSE | TRUE | FALSE | 14.46 |
| P00738 | 56  | YKLBTEGDGVYT  | FALSE | TRUE | FALSE | 11.47 |
| P00738 | 111 | CKNYYKLBTEGD  | FALSE | TRUE | FALSE | 10.82 |
| P00738 | 113 | NYYKLBTEGDGV  | FALSE | TRUE | FALSE | 10.76 |
| P00738 | 114 | YYKLBTEGDGVY  | FALSE | TRUE | FALSE | 14.46 |
| P00738 | 115 | YKLBTEGDGVYT  | FALSE | TRUE | FALSE | 11.47 |
| P00738 | 275 | VGBVGYSVSGWGB | FALSE | TRUE | FALSE | 12.48 |
| P00738 | 276 | GBVGYSVSGWGBN | FALSE | TRUE | FALSE | 22.76 |
| P00738 | 277 | BVGYSVSGWGBNA | FALSE | TRUE | FALSE | 18.31 |
| P00738 | 283 | GWGBNANFKFTD  | FALSE | TRUE | FALSE | 11.46 |
| P00738 | 285 | GBNANFKFTDHL  | FALSE | TRUE | FALSE | 10.87 |
| P00738 | 310 | IBHYEGSTVPEK  | FALSE | TRUE | FALSE | 11.21 |
| P0DMV8 | 69  | DAKBLIGBKFGD  | FALSE | TRUE | FALSE | 14.28 |
| P0DMV8 | 73  | LIGBKFGDPVVQ  | FALSE | TRUE | FALSE | 10.13 |
| P0DMV8 | 75  | GBKFGDPVVQSD  | FALSE | TRUE | FALSE | 10.82 |
| P0DMV8 | 145 | TVPAYFNDSQBQ  | FALSE | TRUE | FALSE | 10.17 |
| P0DMV8 | 148 | AYFNDSQBQATK  | FALSE | TRUE | FALSE | 22.15 |
| P0DMV8 | 149 | YFNDSQBQATKD  | FALSE | TRUE | FALSE | 21.99 |
| P0DMV8 | 150 | FNDSQBQATKDA  | FALSE | TRUE | FALSE | 16.16 |
| P0DMV8 | 151 | NDSQBQATKDAG  | FALSE | TRUE | FALSE | 17.5  |
| P0DMV8 | 152 | DSQBQATKDAGV  | FALSE | TRUE | FALSE | 28    |
| P0DMV8 | 153 | SQBQATKDAGVI  | FALSE | TRUE | FALSE | 53.03 |
| P0DMV8 | 154 | QBQATKDAGVIA  | FALSE | TRUE | FALSE | 32.28 |
| P0DMV8 | 155 | BQATKDAGVIAG  | FALSE | TRUE | FALSE | 22.29 |
| P0DMV8 | 179 | AAIAYGLDBTGK  | FALSE | TRUE | FALSE | 13.97 |
| P0DMV8 | 181 | IAYGLDBTGKGE  | FALSE | TRUE | FALSE | 13.49 |
| P0DMV8 | 182 | AYGLDBTGKGE   | FALSE | TRUE | FALSE | 23.6  |
| P0DMV8 | 183 | YGLDBTGKGE    | FALSE | TRUE | FALSE | 34.61 |
| P0DMV8 | 184 | GLDBTGKGE     | FALSE | TRUE | FALSE | 20.3  |
| P0DMV8 | 185 | LDBTGKGE      | FALSE | TRUE | FALSE | 21.52 |
| P0DMV8 | 186 | DBTGKGE       | FALSE | TRUE | FALSE | 11.12 |
| P0DMV8 | 232 | DFDNBLVNHVFE  | FALSE | TRUE | FALSE | 10.87 |
| P0DMV8 | 233 | FDNBLVNHVFE   | FALSE | TRUE | FALSE | 17.69 |
| P0DMV8 | 236 | BLVNHVFE      | FALSE | TRUE | FALSE | 16.49 |
| P0DMV8 | 252 | DISQNKBAVBBL  | FALSE | TRUE | FALSE | 11.47 |
| P0DMV8 | 255 | QNKBAVBBLBTA  | FALSE | TRUE | FALSE | 12.13 |
| P0DMV8 | 256 | NKBAVBBLBTAC  | FALSE | TRUE | FALSE | 14.25 |
| P0DMV8 | 257 | KBAVBBLBTACE  | FALSE | TRUE | FALSE | 20.91 |
| P0DMV8 | 258 | BAVBBLBTACEB  | FALSE | TRUE | FALSE | 12.76 |
| P0DMV8 | 259 | AVBBLBTACEBA  | FALSE | TRUE | FALSE | 13.96 |
| P0DMV8 | 260 | VBBLBTACEBAK  | FALSE | TRUE | FALSE | 14.55 |
| P0DMV8 | 261 | BBLBTACEBAKB  | FALSE | TRUE | FALSE | 26.99 |
| P0DMV8 | 262 | BLBTACEBAKBT  | FALSE | TRUE | FALSE | 19.47 |
| P0DMV8 | 263 | LBTACEBAKBT   | FALSE | TRUE | FALSE | 18.95 |
| P0DMV8 | 264 | BTACEBAKBTLS  | FALSE | TRUE | FALSE | 12.17 |
| P0DMV8 | 265 | TACEBAKBTLS   | FALSE | TRUE | FALSE | 11.45 |
| P0DMV8 | 289 | EGIDFYTSITBA  | FALSE | TRUE | FALSE | 14.87 |
| P0DMV8 | 290 | GIDFYTSITBAB  | FALSE | TRUE | FALSE | 15.19 |
| P0DMV8 | 291 | IDFYTSITBA    | FALSE | TRUE | FALSE | 10.76 |



|        |     |              |       |      |       |       |
|--------|-----|--------------|-------|------|-------|-------|
| P0DMV8 | 292 | DFYTSITBABFE | FALSE | TRUE | FALSE | 20.59 |
| P0DMV8 | 293 | FYTSITBABFEE | FALSE | TRUE | FALSE | 26.44 |
| P0DMV8 | 294 | YTSITBABFEEL | FALSE | TRUE | FALSE | 30.62 |
| P0DMV8 | 295 | TSITBABFEELC | FALSE | TRUE | FALSE | 30.41 |
| P0DMV8 | 296 | SITBABFEELCS | FALSE | TRUE | FALSE | 27.31 |
| P0DMV8 | 297 | ITBABFEELCSD | FALSE | TRUE | FALSE | 31.57 |
| P0DMV8 | 298 | TBABFEELCSDL | FALSE | TRUE | FALSE | 25.97 |
| P0DMV8 | 299 | BABFEELCSDLF | FALSE | TRUE | FALSE | 13.87 |
| P0DMV8 | 300 | ABFEELCSDLFB | FALSE | TRUE | FALSE | 10.73 |
| P0DMV8 | 308 | DLFBSTLEPVEK | FALSE | TRUE | FALSE | 12.63 |
| P0DMV8 | 309 | LFBSTLEPVEKA | FALSE | TRUE | FALSE | 27.74 |
| P0DMV8 | 310 | FBSTLEPVEKAL | FALSE | TRUE | FALSE | 28.66 |
| P0DMV8 | 311 | BSTLEPVEKALB | FALSE | TRUE | FALSE | 12.39 |
| P0DMV8 | 347 | QKLLQDFFNGBD | FALSE | TRUE | FALSE | 10.2  |
| P0DMV8 | 410 | MTALIKBNSTIP | FALSE | TRUE | FALSE | 15.26 |
| P0DMV8 | 411 | TALIKBNSTIPT | FALSE | TRUE | FALSE | 12.22 |
| P0DMV8 | 440 | IQVYEGBAMTK  | FALSE | TRUE | FALSE | 10.02 |
| P0DMV8 | 455 | LLGBFELSGIPP | FALSE | TRUE | FALSE | 11.04 |
| P0DMV8 | 456 | LGBFELSGIPPA | FALSE | TRUE | FALSE | 22.65 |
| P0DMV8 | 457 | GBFELSGIPPAP | FALSE | TRUE | FALSE | 10.01 |
| P0DMV8 | 463 | GIPPAPBGVPQI | FALSE | TRUE | FALSE | 13.25 |
| P0DMV8 | 529 | DEVQBEBVSAKN | FALSE | TRUE | FALSE | 14.74 |
| P0DMV8 | 530 | EVQBEBVSAKNA | FALSE | TRUE | FALSE | 25.23 |
| P0DMV8 | 531 | VQBEBVSAKNAL | FALSE | TRUE | FALSE | 39.71 |
| P0DMV8 | 532 | QBEBVSAKNALE | FALSE | TRUE | FALSE | 31.25 |
| P0DMV8 | 533 | BEBVSAKNALES | FALSE | TRUE | FALSE | 18.62 |
| P07900 | 44  | FLBELISNSSDA | FALSE | TRUE | FALSE | 10.27 |
| P07900 | 162 | WESSAGGSFTVB | FALSE | TRUE | FALSE | 13.27 |
| P07900 | 164 | SSAGGSFTVBTD | FALSE | TRUE | FALSE | 10.08 |
| P07900 | 165 | SAGGSFTVBTD  | FALSE | TRUE | FALSE | 12.11 |
| P07900 | 166 | AGGSFTVBTDG  | FALSE | TRUE | FALSE | 12.92 |
| P07900 | 167 | GSFTVBTDGEP  | FALSE | TRUE | FALSE | 13.95 |
| P07900 | 168 | GSFTVBTDGEP  | FALSE | TRUE | FALSE | 12.88 |
| P07900 | 169 | SFTVBTDGEP   | FALSE | TRUE | FALSE | 13.79 |
| P07900 | 173 | BTDGEPMGBGT  | FALSE | TRUE | FALSE | 13.66 |
| P07900 | 174 | TDTGEPMGBGTK | FALSE | TRUE | FALSE | 16.71 |
| P07900 | 175 | DTGEPMGBGTKV | FALSE | TRUE | FALSE | 23.04 |
| P07900 | 176 | TGEPMGBGTKVI | FALSE | TRUE | FALSE | 22    |
| P07900 | 177 | GEPMGBGTKVIL | FALSE | TRUE | FALSE | 15.58 |
| P07900 | 178 | EPMGBGTKVILH | FALSE | TRUE | FALSE | 10.71 |
| P07900 | 193 | DQTEYLEEBBIK | FALSE | TRUE | FALSE | 11.59 |
| P07900 | 194 | QTEYLEEBBIKE | FALSE | TRUE | FALSE | 18.33 |
| P07900 | 195 | TEYLEEBBIKEI | FALSE | TRUE | FALSE | 25.84 |
| P07900 | 196 | EYLEEBBIKEIV | FALSE | TRUE | FALSE | 26.73 |
| P07900 | 197 | YLEEBBIKEIVK | FALSE | TRUE | FALSE | 19.02 |
| P07900 | 288 | EELNKTKPIWTB | FALSE | TRUE | FALSE | 13.82 |
| P07900 | 289 | ELNKTKPIWTBN | FALSE | TRUE | FALSE | 17.3  |
| P07900 | 291 | NKTKPIWTBNPD | FALSE | TRUE | FALSE | 20.36 |
| P07900 | 292 | KTKPIWTBNPDD | FALSE | TRUE | FALSE | 17.54 |
| P07900 | 293 | TKPIWTBNPDDI | FALSE | TRUE | FALSE | 26.2  |
| P07900 | 294 | KPIWTBNPDDIT | FALSE | TRUE | FALSE | 27.59 |
| P07900 | 295 | PIWTBNPDDITN | FALSE | TRUE | FALSE | 11.11 |

|        |     |              |       |      |       |       |
|--------|-----|--------------|-------|------|-------|-------|
| P07900 | 296 | IWTBNPDDITNE | FALSE | TRUE | FALSE | 12.55 |
| P07900 | 342 | FVPBBAPFDLFE | FALSE | TRUE | FALSE | 13.46 |
| P07900 | 376 | ELIPEYLNFBG  | FALSE | TRUE | FALSE | 12.42 |
| P07900 | 379 | PEYLNFBGVVD  | FALSE | TRUE | FALSE | 10.26 |
| P07900 | 380 | EYLNFBGVVDS  | FALSE | TRUE | FALSE | 17.09 |
| P07900 | 381 | YLNFBGVVDSE  | FALSE | TRUE | FALSE | 17.77 |
| P07900 | 382 | LNFBGVVDS    | FALSE | TRUE | FALSE | 21.61 |
| P07900 | 383 | NFBGVVDS     | FALSE | TRUE | FALSE | 13.36 |
| P07900 | 384 | FIBGVVDS     | FALSE | TRUE | FALSE | 20.29 |
| P07900 | 385 | IBGVVDS      | FALSE | TRUE | FALSE | 13.44 |
| P07900 | 393 | DLPLNISBEMLQ | FALSE | TRUE | FALSE | 11.12 |
| P07900 | 394 | LPLNISBEMLQQ | FALSE | TRUE | FALSE | 17.82 |
| P07900 | 396 | LNISBEMLQQSK | FALSE | TRUE | FALSE | 28.53 |
| P07900 | 397 | NISBEMLQQSKI | FALSE | TRUE | FALSE | 19.95 |
| P07900 | 398 | ISBEMLQQSKIL | FALSE | TRUE | FALSE | 22.68 |
| P07900 | 477 | LKDYCTBMKENQ | FALSE | TRUE | FALSE | 11.67 |
| P07900 | 502 | VANSAFVEBLBK | FALSE | TRUE | FALSE | 10.97 |
| P07900 | 503 | ANSAFVEBLBKH | FALSE | TRUE | FALSE | 10.51 |
| P07900 | 506 | AFVEBLBKHG   | FALSE | TRUE | FALSE | 12.71 |
| P07900 | 507 | FVEBLBKHG    | FALSE | TRUE | FALSE | 11.7  |
| P07900 | 680 | DPQTHANBIYBM | FALSE | TRUE | FALSE | 13.11 |
| P02790 | 77  | KSHKWDBELISE | FALSE | TRUE | FALSE | 10.78 |
| P02790 | 78  | SHKWDBELISEB | FALSE | TRUE | FALSE | 14.45 |
| P02790 | 79  | HKWDBELISEBW | FALSE | TRUE | FALSE | 19.56 |
| P02790 | 80  | KWDBELISEBWK | FALSE | TRUE | FALSE | 22.58 |
| P02790 | 81  | WDBELISEBWKN | FALSE | TRUE | FALSE | 16.6  |
| P02790 | 82  | DBELISEBWKNF | FALSE | TRUE | FALSE | 21.99 |
| P02790 | 83  | BELISEBWKNFP | FALSE | TRUE | FALSE | 16.96 |
| P02790 | 95  | SPVDAAFBQGHN | FALSE | TRUE | FALSE | 12.95 |
| P02790 | 97  | VDAAFBQGHNSV | FALSE | TRUE | FALSE | 11.32 |
| P02790 | 98  | DAAFBQGHNSVF | FALSE | TRUE | FALSE | 10.91 |
| P02790 | 146 | AVECHBGECQAE | FALSE | TRUE | FALSE | 11.79 |
| P02790 | 147 | VECHBGECQAEG | FALSE | TRUE | FALSE | 13.24 |
| P02790 | 186 | GNCSSALBWLGB | FALSE | TRUE | FALSE | 13.63 |
| P02790 | 202 | QGNQFLBFD    | FALSE | TRUE | FALSE | 14.66 |
| P02790 | 203 | GNQFLBFD     | FALSE | TRUE | FALSE | 18.44 |
| P02790 | 204 | NQFLBFD      | FALSE | TRUE | FALSE | 17.03 |
| P02790 | 205 | QFLBFD       | FALSE | TRUE | FALSE | 29.64 |
| P02790 | 207 | LBFDPVBGEVPP | FALSE | TRUE | FALSE | 27.62 |
| P02790 | 208 | BFDPVBGEVPPB | FALSE | TRUE | FALSE | 13.98 |
| P02790 | 209 | FDPVBGEVPPBY | FALSE | TRUE | FALSE | 22.83 |
| P02790 | 210 | DPVBGEVPPBYP | FALSE | TRUE | FALSE | 10.34 |
| P02790 | 211 | PVBGEVPPBYPB | FALSE | TRUE | FALSE | 10.82 |
| P02790 | 212 | VBGEVPPBYPBD | FALSE | TRUE | FALSE | 19.21 |
| P02790 | 213 | BGEVPPBYPBDV | FALSE | TRUE | FALSE | 25.64 |
| P02790 | 215 | EVPPBYPBDVBD | FALSE | TRUE | FALSE | 10.01 |
| P02790 | 216 | VPPBYPBDVBDY | FALSE | TRUE | FALSE | 13.08 |
| P02790 | 219 | BYPBDVBDYFMP | FALSE | TRUE | FALSE | 12.23 |
| P02790 | 222 | BDVBDYFMPCPG | FALSE | TRUE | FALSE | 11.01 |
| P02790 | 223 | DVBDYFMPCPGB | FALSE | TRUE | FALSE | 12.06 |
| P02790 | 224 | VBDYFMPCPGBG | FALSE | TRUE | FALSE | 15.52 |
| P02790 | 225 | BDYFMPCPGBGH | FALSE | TRUE | FALSE | 16.93 |

|        |     |              |       |      |       |       |
|--------|-----|--------------|-------|------|-------|-------|
| P02790 | 226 | DYFMPCPGBGHG | FALSE | TRUE | FALSE | 11.82 |
| P02790 | 227 | YFMPCPGBGHGH | FALSE | TRUE | FALSE | 12.28 |
| P02790 | 228 | FMPCPGBGHGHB | FALSE | TRUE | FALSE | 17.53 |
| P02790 | 229 | MPCPGBGHGHBN | FALSE | TRUE | FALSE | 24.59 |
| P02790 | 230 | PCPGBGHGHBNB | FALSE | TRUE | FALSE | 22.17 |
| P02790 | 231 | CPGBGHGHBNGT | FALSE | TRUE | FALSE | 36.1  |
| P02790 | 232 | PGBGHGHBNGTG | FALSE | TRUE | FALSE | 26.26 |
| P02790 | 233 | GBGHGHBNGTGH | FALSE | TRUE | FALSE | 20.11 |
| P02790 | 234 | BGHGHBNGTGHG | FALSE | TRUE | FALSE | 21.8  |
| P02790 | 236 | HGHBNGTGHGNS | FALSE | TRUE | FALSE | 13.37 |
| P02790 | 237 | GHBNGTGHGNST | FALSE | TRUE | FALSE | 11.91 |
| P02790 | 238 | HBNGTGHGNSTH | FALSE | TRUE | FALSE | 10.8  |
| P02790 | 245 | GNSTHHGPEYMB | FALSE | TRUE | FALSE | 13.06 |
| P02790 | 278 | SGTHYWBLDTSB | FALSE | TRUE | FALSE | 13.86 |
| P02790 | 279 | GTHYWBLDTSBD | FALSE | TRUE | FALSE | 11.82 |
| P02790 | 283 | WBLDTSBDGWHS | FALSE | TRUE | FALSE | 12.46 |
| P02790 | 284 | BLDTSBDGWHSW | FALSE | TRUE | FALSE | 13.39 |
| Q5SSJ5 | 33  | KVEDSTMPIBBT | FALSE | TRUE | FALSE | 11.78 |
| Q5SSJ5 | 34  | VEDSTMPIBBTV | FALSE | TRUE | FALSE | 13.27 |
| Q5SSJ5 | 35  | EDSTMPIBBTVN | FALSE | TRUE | FALSE | 10.63 |
| Q5SSJ5 | 36  | DSTMPIBBTVNS | FALSE | TRUE | FALSE | 16.52 |
| Q5SSJ5 | 37  | STMPIBBTVNST | FALSE | TRUE | FALSE | 20.92 |
| Q5SSJ5 | 38  | TMPIBBTVNSTB | FALSE | TRUE | FALSE | 36.57 |
| Q5SSJ5 | 39  | MPIBBTVNSTBE | FALSE | TRUE | FALSE | 35.17 |
| Q5SSJ5 | 40  | PIBBTVNSTBET | FALSE | TRUE | FALSE | 31.31 |
| Q5SSJ5 | 41  | IBBTVNSTBETP | FALSE | TRUE | FALSE | 35.7  |
| Q5SSJ5 | 42  | BBTVNSTBETPP | FALSE | TRUE | FALSE | 31.95 |
| Q5SSJ5 | 43  | BTVNSTBETPPK | FALSE | TRUE | FALSE | 15.16 |
| Q5SSJ5 | 44  | TVNSTBETPPKS | FALSE | TRUE | FALSE | 11.18 |
| Q5SSJ5 | 142 | SQLABAQKQTPM | FALSE | TRUE | FALSE | 13.13 |
| Q5SSJ5 | 143 | QLABAQKQTPMA | FALSE | TRUE | FALSE | 13.05 |
| Q5SSJ5 | 188 | IHKYPSLELEBB | FALSE | TRUE | FALSE | 13.01 |
| Q5SSJ5 | 189 | HKYPSLELEBBG | FALSE | TRUE | FALSE | 13.54 |
| Q5SSJ5 | 190 | KYPSLELEBBGY | FALSE | TRUE | FALSE | 28.87 |
| Q5SSJ5 | 191 | YPSLELEBBGYL | FALSE | TRUE | FALSE | 28    |
| Q5SSJ5 | 192 | PSLELEBBGYLL | FALSE | TRUE | FALSE | 13.23 |
| Q5SSJ5 | 193 | SLELEBBGYLLK | FALSE | TRUE | FALSE | 34.11 |
| Q5SSJ5 | 194 | LELEBBGYLLKQ | FALSE | TRUE | FALSE | 39.42 |
| Q5SSJ5 | 195 | ELEBBGYLLKQA | FALSE | TRUE | FALSE | 20.26 |
| Q5SSJ5 | 196 | LEBBGYLLKQAL | FALSE | TRUE | FALSE | 22.47 |
| Q5SSJ5 | 205 | QALKBELNBGVI | FALSE | TRUE | FALSE | 24.57 |
| Q5SSJ5 | 209 | BELNBGVIKQVK | FALSE | TRUE | FALSE | 11.1  |
| Q5SSJ5 | 241 | SBNBKNBSSAVD | FALSE | TRUE | FALSE | 36.02 |
| Q5SSJ5 | 242 | BNBKNBSSAVDP | FALSE | TRUE | FALSE | 17.17 |
| Q5SSJ5 | 243 | NBKNBSSAVDPE | FALSE | TRUE | FALSE | 16.62 |
| Q5SSJ5 | 244 | BKNBSSAVDPEP | FALSE | TRUE | FALSE | 14.62 |
| Q5SSJ5 | 286 | SQYYPKLBVDIB | FALSE | TRUE | FALSE | 11.4  |
| Q5SSJ5 | 288 | YYPKLBVDIBPQ | FALSE | TRUE | FALSE | 10.64 |
| Q5SSJ5 | 302 | KNALQBAVEBGQ | FALSE | TRUE | FALSE | 10.41 |
| Q5SSJ5 | 303 | NALQBAVEBGQL | FALSE | TRUE | FALSE | 17.94 |
| Q5SSJ5 | 304 | ALQBAVEBGQLE | FALSE | TRUE | FALSE | 20.24 |
| Q5SSJ5 | 305 | LQBAVEBGQLEQ | FALSE | TRUE | FALSE | 20.21 |

|        |     |              |       |      |       |       |
|--------|-----|--------------|-------|------|-------|-------|
| Q5SSJ5 | 306 | QBAVEBGQLEQI | FALSE | TRUE | FALSE | 10.34 |
| Q5SSJ5 | 307 | BAVEBGQLEQIT | FALSE | TRUE | FALSE | 20.99 |
| Q5SSJ5 | 309 | VEBGQLEQITGK | FALSE | TRUE | FALSE | 14.65 |
| Q5SSJ5 | 310 | EBGQLEQITGKG | FALSE | TRUE | FALSE | 11.94 |
| Q5SSJ5 | 311 | BGQLEQITGKGA | FALSE | TRUE | FALSE | 15.43 |
| P09429 | 23  | CBEEHKKKHPDA | FALSE | TRUE | FALSE | 14.22 |
| P09429 | 63  | MAKADKABYEBE | FALSE | TRUE | FALSE | 13.08 |
| P09429 | 66  | ADKABYEBEMKT | FALSE | TRUE | FALSE | 11.05 |
| P09429 | 67  | DKABYEBEMKTY | FALSE | TRUE | FALSE | 24.24 |
| P09429 | 68  | KABYEBEMKTYI | FALSE | TRUE | FALSE | 40.21 |
| P09429 | 69  | ABYEBEMKTYIP | FALSE | TRUE | FALSE | 21.63 |
| P09429 | 70  | BYEBEMKTYIPP | FALSE | TRUE | FALSE | 14.12 |
| P09429 | 158 | DIAAYBAKGKPD | FALSE | TRUE | FALSE | 11.98 |
| P26583 | 23  | CBEEHKKKHPDS | FALSE | TRUE | FALSE | 16.53 |
| P26583 | 63  | MAKSDKABYDBE | FALSE | TRUE | FALSE | 17.43 |
| P26583 | 64  | AKSDKABYDBEM | FALSE | TRUE | FALSE | 14.85 |
| P26583 | 66  | SDKABYDBEMKN | FALSE | TRUE | FALSE | 10.99 |
| P26583 | 67  | DKABYDBEMKNY | FALSE | TRUE | FALSE | 22.54 |
| P26583 | 68  | KABYDBEMKNYV | FALSE | TRUE | FALSE | 11.26 |
| P26583 | 70  | BYDBEMKNYVPP | FALSE | TRUE | FALSE | 18.13 |
| A1L407 | 25  | BGBKPAGLISAS | FALSE | TRUE | FALSE | 10.62 |
| A1L407 | 92  | VNKGILVQTBGT | FALSE | TRUE | FALSE | 17.71 |
| A1L407 | 93  | NKGILVQTBGTG | FALSE | TRUE | FALSE | 14.04 |
| A1L407 | 94  | KGILVQTBGTGA | FALSE | TRUE | FALSE | 13.46 |
| A1L407 | 95  | GILVQTBGTGAS | FALSE | TRUE | FALSE | 23.44 |
| A1L407 | 96  | ILVQTBGTGASG | FALSE | TRUE | FALSE | 43.65 |
| A1L407 | 97  | LVQTBGTGASGS | FALSE | TRUE | FALSE | 51.57 |
| A1L407 | 98  | VQTBGTGASGSF | FALSE | TRUE | FALSE | 40.72 |
| A1L407 | 99  | QTBGTGASGSFK | FALSE | TRUE | FALSE | 13.72 |
| A1L407 | 100 | TBGTGASGSFKL | FALSE | TRUE | FALSE | 10.48 |
| A1L407 | 157 | BATTPKTVBSGB | FALSE | TRUE | FALSE | 12.88 |
| A1L407 | 194 | QHHEVNVBKATS | FALSE | TRUE | FALSE | 10.55 |
| P07305 | 36  | IQAENBAGSSB  | FALSE | TRUE | FALSE | 21.91 |
| P07305 | 37  | QAENBAGSSBQ  | FALSE | TRUE | FALSE | 38.1  |
| P07305 | 38  | AEKNBAGSSBQS | FALSE | TRUE | FALSE | 39.51 |
| P07305 | 39  | EKNBAGSSBQSI | FALSE | TRUE | FALSE | 36.5  |
| P07305 | 40  | KNBAGSSBQSIQ | FALSE | TRUE | FALSE | 18.18 |
| P07305 | 41  | NBAGSSBQSIQK | FALSE | TRUE | FALSE | 24.2  |
| P07305 | 42  | BAGSSBQSIQKY | FALSE | TRUE | FALSE | 16.11 |
| P07305 | 43  | AGSSBQSIQKYI | FALSE | TRUE | FALSE | 12.49 |
| Q02539 | 50  | AASSSKEBGGVS | FALSE | TRUE | FALSE | 10.28 |
| Q02539 | 51  | ASSSKEBGGVSL | FALSE | TRUE | FALSE | 15.9  |
| Q02539 | 52  | SSSKEBGGVSLA | FALSE | TRUE | FALSE | 13.69 |
| Q02539 | 54  | SKEBGGVSLAAL | FALSE | TRUE | FALSE | 12.19 |
| P16401 | 54  | SKEBNGLSLAAL | FALSE | TRUE | FALSE | 10.56 |
| Q8IZA3 | 11  | SPSSTSTAGSSB | FALSE | TRUE | FALSE | 11.36 |
| Q8IZA3 | 42  | SHSSLPVGBBHP | FALSE | TRUE | FALSE | 12.73 |
| Q8IZA3 | 43  | HSSLPVGBBHPP | FALSE | TRUE | FALSE | 17.95 |
| Q8IZA3 | 44  | SSLPVGBBHPPV | FALSE | TRUE | FALSE | 21.99 |
| Q8IZA3 | 45  | SLPVGBBHPPVL | FALSE | TRUE | FALSE | 19.03 |
| Q8IZA3 | 46  | LPVGBBHPPVLB | FALSE | TRUE | FALSE | 22.66 |
| Q8IZA3 | 47  | PVGBBHPPVLBM | FALSE | TRUE | FALSE | 12.12 |

|        |     |              |       |      |       |       |
|--------|-----|--------------|-------|------|-------|-------|
| Q8IZA3 | 48  | VGBBHPPVLBMV | FALSE | TRUE | FALSE | 16.91 |
| Q8IZA3 | 49  | GBBHPPVLBMVL | FALSE | TRUE | FALSE | 10.83 |
| Q8IZA3 | 50  | BBHPPVLBMVLE | FALSE | TRUE | FALSE | 12.73 |
| Q8IZA3 | 61  | EALQAGEQBBGT | FALSE | TRUE | FALSE | 12.55 |
| Q8IZA3 | 62  | ALQAGEQBBGTS | FALSE | TRUE | FALSE | 29.73 |
| Q8IZA3 | 63  | LQAGEQBBGTSV | FALSE | TRUE | FALSE | 45.73 |
| Q8IZA3 | 64  | QAGEQBBGTSVA | FALSE | TRUE | FALSE | 31.88 |
| Q8IZA3 | 65  | AGEQBBGTSVAA | FALSE | TRUE | FALSE | 24.1  |
| Q8IZA3 | 66  | GEQBBGTSVAAI | FALSE | TRUE | FALSE | 36.4  |
| Q8IZA3 | 67  | EQBBGTSVAAIK | FALSE | TRUE | FALSE | 43.91 |
| Q8IZA3 | 68  | QBBGTSVAAIKL | FALSE | TRUE | FALSE | 20.96 |
| Q8IZA3 | 99  | QALATGMBBGLL | FALSE | TRUE | FALSE | 22.55 |
| Q8IZA3 | 100 | ALATGMBBGLLA | FALSE | TRUE | FALSE | 18.47 |
| Q8IZA3 | 101 | LATGMBBGLLAB | FALSE | TRUE | FALSE | 12.82 |
| Q8IZA3 | 102 | ATGMBBGLLABP | FALSE | TRUE | FALSE | 19.74 |
| Q8IZA3 | 103 | TGMBBGLLABPL | FALSE | TRUE | FALSE | 22.41 |
| Q8IZA3 | 104 | GMBBGLLABPLN | FALSE | TRUE | FALSE | 17.41 |
| Q8IZA3 | 105 | MBBGLLABPLNS | FALSE | TRUE | FALSE | 34.83 |
| Q8IZA3 | 106 | BBGLLABPLNSK | FALSE | TRUE | FALSE | 13.31 |
| Q8IZA3 | 114 | LNSKABGATGSF | FALSE | TRUE | FALSE | 12.11 |
| Q8IZA3 | 143 | ATAPBBAGEAKG | FALSE | TRUE | FALSE | 14.16 |
| Q8IZA3 | 200 | QGGAAKDTBAQS | FALSE | TRUE | FALSE | 13.67 |
| Q8IZA3 | 201 | GGAAKDTBAQSG | FALSE | TRUE | FALSE | 13.7  |
| Q8IZA3 | 202 | GAAKDTBAQSGE | FALSE | TRUE | FALSE | 12.33 |
| Q8IZA3 | 204 | AKDTBAQSGEAB | FALSE | TRUE | FALSE | 17.35 |
| Q8IZA3 | 205 | KDTBAQSGEABK | FALSE | TRUE | FALSE | 29.89 |
| Q8IZA3 | 206 | DTBAQSGEABKV | FALSE | TRUE | FALSE | 19.07 |
| Q8IZA3 | 208 | BAQSGEABKVPP | FALSE | TRUE | FALSE | 18.96 |
| Q8IZA3 | 225 | MBAPSSAGGLSB | FALSE | TRUE | FALSE | 13.27 |
| Q8IZA3 | 243 | SBSSQGDAEAYB | FALSE | TRUE | FALSE | 13.4  |
| Q8IZA3 | 244 | BSSQGDAEAYBK | FALSE | TRUE | FALSE | 16.78 |
| Q8IZA3 | 310 | VVPAHLSBKTEA | FALSE | TRUE | FALSE | 15.96 |
| Q8IZA3 | 311 | VPAHLSBKTEAP | FALSE | TRUE | FALSE | 11.68 |
| P22492 | 25  | BGBKPAGLISAS | FALSE | TRUE | FALSE | 10.62 |
| P22492 | 92  | VNKGILVQTBGT | FALSE | TRUE | FALSE | 17.71 |
| P22492 | 93  | NKGILVQTBGTG | FALSE | TRUE | FALSE | 14.04 |
| P22492 | 94  | KGILVQTBGTGA | FALSE | TRUE | FALSE | 13.46 |
| P22492 | 95  | GILVQTBGTGAS | FALSE | TRUE | FALSE | 23.44 |
| P22492 | 96  | ILVQTBGTGASG | FALSE | TRUE | FALSE | 43.65 |
| P22492 | 97  | LVQTBGTGASGS | FALSE | TRUE | FALSE | 51.57 |
| P22492 | 98  | VQTBGTGASGSF | FALSE | TRUE | FALSE | 40.72 |
| P22492 | 99  | QTBGTGASGSFK | FALSE | TRUE | FALSE | 13.72 |
| P22492 | 100 | TBGTGASGSFKL | FALSE | TRUE | FALSE | 10.48 |
| P22492 | 157 | BATTPKTVBSGB | FALSE | TRUE | FALSE | 12.88 |
| P22492 | 194 | QHHEVNVBKATS | FALSE | TRUE | FALSE | 10.55 |
| Q92522 | 47  | KYSQLVVETIBB | FALSE | TRUE | FALSE | 12.89 |
| Q92522 | 47  | KYSQLVVETIBB | FALSE | TRUE | FALSE | 11.53 |
| Q92522 | 49  | SQLVVETIBBLG | FALSE | TRUE | FALSE | 10.42 |
| Q92522 | 50  | QLVVETIBBLGE | FALSE | TRUE | FALSE | 10.32 |
| Q92522 | 50  | QLVVETIBBLGE | FALSE | TRUE | FALSE | 10.02 |
| Q92522 | 51  | LVVETIBBLGEB | FALSE | TRUE | FALSE | 15.71 |
| Q92522 | 51  | LVVETIBBLGEB | FALSE | TRUE | FALSE | 13.41 |

|        |     |               |       |      |       |       |
|--------|-----|---------------|-------|------|-------|-------|
| Q92522 | 52  | VVETIBBLGEBN  | FALSE | TRUE | FALSE | 18.03 |
| Q92522 | 52  | VVETIBBLGEBN  | FALSE | TRUE | FALSE | 17.28 |
| Q92522 | 53  | VETIBBLGEBNG  | FALSE | TRUE | FALSE | 17.54 |
| Q92522 | 53  | VETIBBLGEBNG  | FALSE | TRUE | FALSE | 17.97 |
| Q92522 | 54  | ETIBBLGEBNGS  | FALSE | TRUE | FALSE | 22.59 |
| Q92522 | 54  | ETIBBLGEBNGS  | FALSE | TRUE | FALSE | 20.33 |
| Q92522 | 55  | TIBBLGEBNGSS  | FALSE | TRUE | FALSE | 28.98 |
| Q92522 | 55  | TIBBLGEBNGSS  | FALSE | TRUE | FALSE | 37.86 |
| Q92522 | 56  | IBBLGEBNGSSL  | FALSE | TRUE | FALSE | 38.18 |
| Q92522 | 56  | IBBLGEBNGSSL  | FALSE | TRUE | FALSE | 38.28 |
| Q92522 | 57  | BBLGEBNGSSLA  | FALSE | TRUE | FALSE | 35.67 |
| Q92522 | 57  | BBLGEBNGSSLA  | FALSE | TRUE | FALSE | 33.04 |
| Q92522 | 58  | BLGEBNGSSLAK  | FALSE | TRUE | FALSE | 19.81 |
| Q92522 | 58  | BLGEBNGSSLAK  | FALSE | TRUE | FALSE | 20.51 |
| Q92522 | 59  | LGEBNGSSLAKI  | FALSE | TRUE | FALSE | 10.83 |
| Q92522 | 59  | LGEBNGSSLAKI  | FALSE | TRUE | FALSE | 10.03 |
| Q92522 | 75  | KKVPWFDQQNGB  | FALSE | TRUE | FALSE | 10.28 |
| Q92522 | 76  | KVPWFDQQNGBT  | FALSE | TRUE | FALSE | 11.34 |
| Q92522 | 76  | KVPWFDQQNGBT  | FALSE | TRUE | FALSE | 10.57 |
| Q92522 | 121 | LEGGGEBBGAPA  | FALSE | TRUE | FALSE | 11.98 |
| Q92522 | 121 | LEGGGEBBGAPA  | FALSE | TRUE | FALSE | 12.46 |
| Q92522 | 122 | EGGGEBBGAPAA  | FALSE | TRUE | FALSE | 10.25 |
| Q92522 | 123 | GGGEBBGAPAAA  | FALSE | TRUE | FALSE | 10.95 |
| Q92522 | 123 | GGGEBBGAPAAA  | FALSE | TRUE | FALSE | 11.88 |
| Q92522 | 124 | GGEBBGAPAAAT  | FALSE | TRUE | FALSE | 23.32 |
| Q92522 | 124 | GGEBBGAPAAAT  | FALSE | TRUE | FALSE | 24.25 |
| Q92522 | 125 | GEBBGAPAAATA  | FALSE | TRUE | FALSE | 27.63 |
| Q92522 | 125 | GEBBGAPAAATA  | FALSE | TRUE | FALSE | 27.07 |
| Q92522 | 126 | EBBGAPAAATAP  | FALSE | TRUE | FALSE | 29.33 |
| Q92522 | 126 | EBBGAPAAATAP  | FALSE | TRUE | FALSE | 25.13 |
| Q92522 | 127 | BBGAPAAATAPA  | FALSE | TRUE | FALSE | 27.66 |
| Q92522 | 127 | BBGAPAAATAPA  | FALSE | TRUE | FALSE | 26.87 |
| Q92522 | 128 | BGAPAAATAPAP  | FALSE | TRUE | FALSE | 13.06 |
| Q92522 | 128 | BGAPAAATAPAP  | FALSE | TRUE | FALSE | 15.91 |
| Q92522 | 148 | APGAAGSBBADK  | FALSE | TRUE | FALSE | 16.36 |
| Q92522 | 148 | APGAAGSBBADK  | FALSE | TRUE | FALSE | 18.8  |
| Q92522 | 152 | AGSBBADKKPAB  | FALSE | TRUE | FALSE | 10.15 |
| Q92522 | 153 | GSBBADKKPABG  | FALSE | TRUE | FALSE | 11.9  |
| Q92522 | 154 | SBBADKKPABGQ  | FALSE | TRUE | FALSE | 21.33 |
| Q92522 | 154 | SBBADKKPABGQ  | FALSE | TRUE | FALSE | 26.59 |
| Q92522 | 161 | PABGQKPEQBSh  | FALSE | TRUE | FALSE | 30.98 |
| Q92522 | 161 | PABGQKPEQBSh  | FALSE | TRUE | FALSE | 31.46 |
| O75367 | 245 | VLELBKKNNGPLE | FALSE | TRUE | FALSE | 13.17 |
| O75367 | 246 | LELBKKNNGPLEV | FALSE | TRUE | FALSE | 12.02 |
| O75367 | 308 | SIAFPSIGSGBN  | FALSE | TRUE | FALSE | 11.39 |
| O75367 | 309 | IAFPSIGSGBNG  | FALSE | TRUE | FALSE | 15.1  |
| O75367 | 310 | AFPSIGSGBNGF  | FALSE | TRUE | FALSE | 21.91 |
| O75367 | 311 | FPSIGSGBNGFP  | FALSE | TRUE | FALSE | 30.24 |
| Q9P0M6 | 10  | MSKLSBSABAGV  | FALSE | TRUE | FALSE | 26.9  |
| Q9P0M6 | 11  | SKLSBSABAGVI  | FALSE | TRUE | FALSE | 30.24 |
| Q9P0M6 | 13  | LSBSABAGVIFP  | FALSE | TRUE | FALSE | 21.46 |
| Q9P0M6 | 14  | SBSABAGVIFPV  | FALSE | TRUE | FALSE | 20.26 |

|        |     |              |       |      |       |       |
|--------|-----|--------------|-------|------|-------|-------|
| Q9P0M6 | 15  | BSABAGVIFPVG | FALSE | TRUE | FALSE | 18.12 |
| Q9P0M6 | 16  | SABAGVIFPVGB | FALSE | TRUE | FALSE | 24.04 |
| Q9P0M6 | 126 | TILSPPEKBGB  | FALSE | TRUE | FALSE | 20.76 |
| Q9P0M6 | 129 | SPPPEKBGBKAT | FALSE | TRUE | FALSE | 14.56 |
| Q9P0M6 | 308 | SVAFPFSPSGBN | FALSE | TRUE | FALSE | 14.61 |
| P0C0S8 | 15  | AKTBSSBAGLQF | FALSE | TRUE | FALSE | 12.14 |
| P0C0S8 | 16  | KTBSSBAGLQFP | FALSE | TRUE | FALSE | 22.31 |
| P0C0S8 | 17  | TBSSBAGLQFPV | FALSE | TRUE | FALSE | 44.52 |
| P0C0S8 | 18  | BSSBAGLQFPVG | FALSE | TRUE | FALSE | 36.47 |
| P0C0S8 | 19  | SSBAGLQFPVGB | FALSE | TRUE | FALSE | 35.53 |
| P0C0S8 | 20  | SBAGLQFPVGBV | FALSE | TRUE | FALSE | 34.17 |
| P0C0S8 | 21  | BAGLQFPVGBVH | FALSE | TRUE | FALSE | 11.02 |
| P0C0S8 | 31  | VHLLBKGNYAE  | FALSE | TRUE | FALSE | 11.94 |
| P0C0S8 | 32  | HBLLBKGNYAEB | FALSE | TRUE | FALSE | 40.27 |
| P0C0S8 | 33  | BLLBKGNYAEBV | FALSE | TRUE | FALSE | 50.69 |
| P0C0S8 | 34  | LLBKGNYAEBVG | FALSE | TRUE | FALSE | 36.2  |
| P0C0S8 | 35  | LBKGNYAEBVGA | FALSE | TRUE | FALSE | 24.44 |
| P0C0S8 | 36  | BKGNYAEBVGAG | FALSE | TRUE | FALSE | 17.49 |
| P0C0S8 | 40  | YAEBVGAGAPVY | FALSE | TRUE | FALSE | 14.42 |
| P0C0S8 | 79  | IIPBHLQLAIBN | FALSE | TRUE | FALSE | 11.95 |
| P0C0S8 | 80  | IPBHLQLAIBND | FALSE | TRUE | FALSE | 24.36 |
| P0C0S8 | 81  | PBHLQLAIBNDE | FALSE | TRUE | FALSE | 18.81 |
| P0C0S8 | 82  | BHLQLAIBNDEE | FALSE | TRUE | FALSE | 10.35 |
| P0C0S8 | 84  | LQLAIBNDEELN | FALSE | TRUE | FALSE | 12.7  |
| P0C0S8 | 85  | QLAIBNDEELNK | FALSE | TRUE | FALSE | 12.24 |
| P0C0S8 | 86  | LAIBNDEELNKL | FALSE | TRUE | FALSE | 10.95 |
| Q96QV6 | 15  | SKSBSSBAGLQF | FALSE | TRUE | FALSE | 20.6  |
| Q96QV6 | 16  | KSBSSBAGLQFP | FALSE | TRUE | FALSE | 12.75 |
| Q96QV6 | 17  | SBSSBAGLQFPV | FALSE | TRUE | FALSE | 41.02 |
| Q96QV6 | 18  | BSSBAGLQFPVG | FALSE | TRUE | FALSE | 36.47 |
| Q96QV6 | 19  | SSBAGLQFPVGB | FALSE | TRUE | FALSE | 35.53 |
| Q96QV6 | 20  | SBAGLQFPVGBI | FALSE | TRUE | FALSE | 34.66 |
| Q96QV6 | 31  | IHBLLBKGNYAE | FALSE | TRUE | FALSE | 11.97 |
| Q96QV6 | 32  | HBLLBKGNYAEB | FALSE | TRUE | FALSE | 40.27 |
| Q96QV6 | 33  | BLLBKGNYAEBI | FALSE | TRUE | FALSE | 57.12 |
| Q96QV6 | 34  | LLBKGNYAEBIG | FALSE | TRUE | FALSE | 39.38 |
| Q96QV6 | 35  | LBKGNYAEBIGA | FALSE | TRUE | FALSE | 24.59 |
| Q96QV6 | 36  | BKGNYAEBIGAG | FALSE | TRUE | FALSE | 15.48 |
| Q96QV6 | 40  | YAEBIGAGAPVY | FALSE | TRUE | FALSE | 14.07 |
| Q96QV6 | 71  | SBDNKKTBIIPB | FALSE | TRUE | FALSE | 11.12 |
| Q96QV6 | 79  | IIPBHLQLAIBN | FALSE | TRUE | FALSE | 11.95 |
| Q96QV6 | 80  | IPBHLQLAIBND | FALSE | TRUE | FALSE | 24.36 |
| Q96QV6 | 81  | PBHLQLAIBNDE | FALSE | TRUE | FALSE | 18.81 |
| Q96QV6 | 82  | BHLQLAIBNDEE | FALSE | TRUE | FALSE | 10.35 |
| Q96QV6 | 84  | LQLAIBNDEELN | FALSE | TRUE | FALSE | 12.7  |
| Q96QV6 | 85  | QLAIBNDEELNK | FALSE | TRUE | FALSE | 12.24 |
| Q96QV6 | 86  | LAIBNDEELNKL | FALSE | TRUE | FALSE | 10.95 |
| P04908 | 15  | AKTBSSBAGLQF | FALSE | TRUE | FALSE | 12.14 |
| P04908 | 16  | KTBSSBAGLQFP | FALSE | TRUE | FALSE | 22.31 |
| P04908 | 17  | TBSSBAGLQFPV | FALSE | TRUE | FALSE | 44.52 |
| P04908 | 18  | BSSBAGLQFPVG | FALSE | TRUE | FALSE | 36.47 |
| P04908 | 19  | SSBAGLQFPVGB | FALSE | TRUE | FALSE | 35.53 |

|        |    |              |       |      |       |       |
|--------|----|--------------|-------|------|-------|-------|
| P04908 | 20 | SBAGLQFPVGBV | FALSE | TRUE | FALSE | 34.17 |
| P04908 | 21 | BAGLQFPVGBVH | FALSE | TRUE | FALSE | 11.02 |
| P04908 | 31 | VHLLBKGNYS   | FALSE | TRUE | FALSE | 18.61 |
| P04908 | 32 | HBLLBKGNYSB  | FALSE | TRUE | FALSE | 52.06 |
| P04908 | 33 | BLLBKGNYSBV  | FALSE | TRUE | FALSE | 44.82 |
| P04908 | 34 | LLBKGNYSBVG  | FALSE | TRUE | FALSE | 40.91 |
| P04908 | 35 | LBKGNYSBVG   | FALSE | TRUE | FALSE | 25.67 |
| P04908 | 36 | BKGNYSBVGAG  | FALSE | TRUE | FALSE | 18.16 |
| P04908 | 37 | KGNYSBVGAGA  | FALSE | TRUE | FALSE | 11.37 |
| P04908 | 38 | GNYSBVGAGAP  | FALSE | TRUE | FALSE | 10.33 |
| P04908 | 39 | NYSEBVGAGAPV | FALSE | TRUE | FALSE | 17.1  |
| P04908 | 40 | YSEBVGAGAPVY | FALSE | TRUE | FALSE | 22.62 |
| P04908 | 79 | IIPBHLQLAIBN | FALSE | TRUE | FALSE | 11.95 |
| P04908 | 80 | IPBHLQLAIBND | FALSE | TRUE | FALSE | 24.36 |
| P04908 | 81 | PBHLQLAIBNDE | FALSE | TRUE | FALSE | 18.81 |
| P04908 | 82 | BHLQLAIBNDEE | FALSE | TRUE | FALSE | 10.35 |
| P04908 | 84 | LQLAIBNDEELN | FALSE | TRUE | FALSE | 12.7  |
| P04908 | 85 | QLAIBNDEELNK | FALSE | TRUE | FALSE | 12.24 |
| P04908 | 86 | LAIBNDEELNKL | FALSE | TRUE | FALSE | 10.95 |
| Q93077 | 16 | KSBSSBAGLQFP | FALSE | TRUE | FALSE | 12.75 |
| Q93077 | 17 | SBSSBAGLQFPV | FALSE | TRUE | FALSE | 41.02 |
| Q93077 | 18 | BSSBAGLQFPVG | FALSE | TRUE | FALSE | 36.47 |
| Q93077 | 19 | SSBAGLQFPVGB | FALSE | TRUE | FALSE | 35.53 |
| Q93077 | 20 | SBAGLQFPVGBV | FALSE | TRUE | FALSE | 34.17 |
| Q93077 | 21 | BAGLQFPVGBVH | FALSE | TRUE | FALSE | 11.02 |
| Q93077 | 31 | VHLLBKGNYSAE | FALSE | TRUE | FALSE | 11.94 |
| Q93077 | 32 | HBLLBKGNYSAB | FALSE | TRUE | FALSE | 40.27 |
| Q93077 | 33 | BLLBKGNYSABV | FALSE | TRUE | FALSE | 50.69 |
| Q93077 | 34 | LLBKGNYSABVG | FALSE | TRUE | FALSE | 36.2  |
| Q93077 | 35 | LBKGNYSABVG  | FALSE | TRUE | FALSE | 24.44 |
| Q93077 | 36 | BKGNYSABVGAG | FALSE | TRUE | FALSE | 17.49 |
| Q93077 | 40 | YABVGAGAPVY  | FALSE | TRUE | FALSE | 14.42 |
| Q93077 | 79 | IIPBHLQLAIBN | FALSE | TRUE | FALSE | 11.95 |
| Q93077 | 80 | IPBHLQLAIBND | FALSE | TRUE | FALSE | 24.36 |
| Q93077 | 81 | PBHLQLAIBNDE | FALSE | TRUE | FALSE | 18.81 |
| Q93077 | 82 | BHLQLAIBNDEE | FALSE | TRUE | FALSE | 10.35 |
| Q93077 | 84 | LQLAIBNDEELN | FALSE | TRUE | FALSE | 12.7  |
| Q93077 | 85 | QLAIBNDEELNK | FALSE | TRUE | FALSE | 12.24 |
| Q93077 | 86 | LAIBNDEELNKL | FALSE | TRUE | FALSE | 10.95 |
| P20671 | 15 | AKTBSSBAGLQF | FALSE | TRUE | FALSE | 12.14 |
| P20671 | 16 | KTBSSBAGLQFP | FALSE | TRUE | FALSE | 22.31 |
| P20671 | 17 | TBSSBAGLQFPV | FALSE | TRUE | FALSE | 44.52 |
| P20671 | 18 | BSSBAGLQFPVG | FALSE | TRUE | FALSE | 36.47 |
| P20671 | 19 | SSBAGLQFPVGB | FALSE | TRUE | FALSE | 35.53 |
| P20671 | 20 | SBAGLQFPVGBV | FALSE | TRUE | FALSE | 34.17 |
| P20671 | 21 | BAGLQFPVGBVH | FALSE | TRUE | FALSE | 11.02 |
| P20671 | 31 | VHLLBKGNYS   | FALSE | TRUE | FALSE | 18.61 |
| P20671 | 32 | HBLLBKGNYSB  | FALSE | TRUE | FALSE | 52.06 |
| P20671 | 33 | BLLBKGNYSBV  | FALSE | TRUE | FALSE | 44.82 |
| P20671 | 34 | LLBKGNYSBVG  | FALSE | TRUE | FALSE | 40.91 |
| P20671 | 35 | LBKGNYSBVG   | FALSE | TRUE | FALSE | 25.67 |
| P20671 | 36 | BKGNYSBVGAG  | FALSE | TRUE | FALSE | 18.16 |



|        |    |              |       |      |       |       |
|--------|----|--------------|-------|------|-------|-------|
| P20671 | 37 | KGNYSBVGAGA  | FALSE | TRUE | FALSE | 11.37 |
| P20671 | 38 | GNYSBVGAGAP  | FALSE | TRUE | FALSE | 10.33 |
| P20671 | 39 | NYSBVGAGAPV  | FALSE | TRUE | FALSE | 17.1  |
| P20671 | 40 | YSBVGAGAPVY  | FALSE | TRUE | FALSE | 22.62 |
| P20671 | 79 | IIPBHLQLAIBN | FALSE | TRUE | FALSE | 11.95 |
| P20671 | 80 | IPBHLQLAIBND | FALSE | TRUE | FALSE | 24.36 |
| P20671 | 81 | PBHLQLAIBNDE | FALSE | TRUE | FALSE | 18.81 |
| P20671 | 82 | BHLQLAIBNDEE | FALSE | TRUE | FALSE | 10.35 |
| P20671 | 84 | LQLAIBNDEELN | FALSE | TRUE | FALSE | 12.7  |
| P20671 | 85 | QLAIBNDEELNK | FALSE | TRUE | FALSE | 12.24 |
| P20671 | 86 | LAIBNDEELNKL | FALSE | TRUE | FALSE | 10.95 |
| Q96KK5 | 15 | AKTBSSBAGLQF | FALSE | TRUE | FALSE | 12.14 |
| Q96KK5 | 16 | KTBSSBAGLQFP | FALSE | TRUE | FALSE | 22.31 |
| Q96KK5 | 17 | TBSSBAGLQFPV | FALSE | TRUE | FALSE | 44.52 |
| Q96KK5 | 18 | BSSBAGLQFPVG | FALSE | TRUE | FALSE | 36.47 |
| Q96KK5 | 19 | SSBAGLQFPVGB | FALSE | TRUE | FALSE | 35.53 |
| Q96KK5 | 20 | SBAGLQFPVGBV | FALSE | TRUE | FALSE | 34.17 |
| Q96KK5 | 21 | BAGLQFPVGBVH | FALSE | TRUE | FALSE | 11.02 |
| Q96KK5 | 31 | VHLLBKGNIAE  | FALSE | TRUE | FALSE | 11.94 |
| Q96KK5 | 32 | HLLBKGNIAEB  | FALSE | TRUE | FALSE | 40.27 |
| Q96KK5 | 33 | LLBKGNIAEBV  | FALSE | TRUE | FALSE | 50.69 |
| Q96KK5 | 34 | LLBKGNIAEBVG | FALSE | TRUE | FALSE | 36.2  |
| Q96KK5 | 35 | LBKGNIAEBVGA | FALSE | TRUE | FALSE | 24.44 |
| Q96KK5 | 36 | BKGNIAEBVGAG | FALSE | TRUE | FALSE | 17.49 |
| Q96KK5 | 40 | YAEVVGAGAPVY | FALSE | TRUE | FALSE | 14.42 |
| Q96KK5 | 79 | IIPBHLQLAIBN | FALSE | TRUE | FALSE | 11.95 |
| Q96KK5 | 80 | IPBHLQLAIBND | FALSE | TRUE | FALSE | 24.36 |
| Q96KK5 | 81 | PBHLQLAIBNDE | FALSE | TRUE | FALSE | 18.81 |
| Q96KK5 | 82 | BHLQLAIBNDEE | FALSE | TRUE | FALSE | 10.35 |
| Q96KK5 | 84 | LQLAIBNDEELN | FALSE | TRUE | FALSE | 12.7  |
| Q96KK5 | 85 | QLAIBNDEELNK | FALSE | TRUE | FALSE | 12.24 |
| Q96KK5 | 86 | LAIBNDEELNKL | FALSE | TRUE | FALSE | 10.95 |
| Q99878 | 15 | AKTBSSBAGLQF | FALSE | TRUE | FALSE | 12.14 |
| Q99878 | 16 | KTBSSBAGLQFP | FALSE | TRUE | FALSE | 22.31 |
| Q99878 | 17 | TBSSBAGLQFPV | FALSE | TRUE | FALSE | 44.52 |
| Q99878 | 18 | BSSBAGLQFPVG | FALSE | TRUE | FALSE | 36.47 |
| Q99878 | 19 | SSBAGLQFPVGB | FALSE | TRUE | FALSE | 35.53 |
| Q99878 | 20 | SBAGLQFPVGBV | FALSE | TRUE | FALSE | 34.17 |
| Q99878 | 21 | BAGLQFPVGBVH | FALSE | TRUE | FALSE | 11.02 |
| Q99878 | 31 | VHLLBKGNIAE  | FALSE | TRUE | FALSE | 11.94 |
| Q99878 | 32 | HLLBKGNIAEB  | FALSE | TRUE | FALSE | 40.27 |
| Q99878 | 33 | LLBKGNIAEBV  | FALSE | TRUE | FALSE | 50.69 |
| Q99878 | 34 | LLBKGNIAEBVG | FALSE | TRUE | FALSE | 36.2  |
| Q99878 | 35 | LBKGNIAEBVGA | FALSE | TRUE | FALSE | 24.44 |
| Q99878 | 36 | BKGNIAEBVGAG | FALSE | TRUE | FALSE | 17.49 |
| Q99878 | 40 | YAEVVGAGAPVY | FALSE | TRUE | FALSE | 14.42 |
| Q99878 | 79 | IIPBHLQLAIBN | FALSE | TRUE | FALSE | 11.95 |
| Q99878 | 80 | IPBHLQLAIBND | FALSE | TRUE | FALSE | 24.36 |
| Q99878 | 81 | PBHLQLAIBNDE | FALSE | TRUE | FALSE | 18.81 |
| Q99878 | 82 | BHLQLAIBNDEE | FALSE | TRUE | FALSE | 10.35 |
| Q99878 | 84 | LQLAIBNDEELN | FALSE | TRUE | FALSE | 12.7  |
| Q99878 | 85 | QLAIBNDEELNK | FALSE | TRUE | FALSE | 12.24 |

|        |    |              |       |      |       |       |
|--------|----|--------------|-------|------|-------|-------|
| Q99878 | 86 | LAIBNDEELNKL | FALSE | TRUE | FALSE | 10.95 |
| Q6FI13 | 16 | KSBSSBAGLQFP | FALSE | TRUE | FALSE | 12.75 |
| Q6FI13 | 17 | SBSSBAGLQFPV | FALSE | TRUE | FALSE | 41.02 |
| Q6FI13 | 18 | BSSBAGLQFPVG | FALSE | TRUE | FALSE | 36.47 |
| Q6FI13 | 19 | SSBAGLQFPVGB | FALSE | TRUE | FALSE | 35.53 |
| Q6FI13 | 20 | SBAGLQFPVGBV | FALSE | TRUE | FALSE | 34.17 |
| Q6FI13 | 21 | BAGLQFPVGBVH | FALSE | TRUE | FALSE | 11.02 |
| Q6FI13 | 31 | VHLLBKGNAYAE | FALSE | TRUE | FALSE | 11.94 |
| Q6FI13 | 32 | HLLBKGNAYAE  | FALSE | TRUE | FALSE | 40.27 |
| Q6FI13 | 33 | LLBKGNAYAEV  | FALSE | TRUE | FALSE | 50.69 |
| Q6FI13 | 34 | LLBKGNAYAEV  | FALSE | TRUE | FALSE | 36.2  |
| Q6FI13 | 35 | LBKGNAYAEVGA | FALSE | TRUE | FALSE | 24.44 |
| Q6FI13 | 36 | BKGNAYAEVGA  | FALSE | TRUE | FALSE | 17.49 |
| Q6FI13 | 40 | YAEVGA       | FALSE | TRUE | FALSE | 14.42 |
| Q6FI13 | 79 | IIPBHLQLAIBN | FALSE | TRUE | FALSE | 11.95 |
| Q6FI13 | 80 | IPBHLQLAIBND | FALSE | TRUE | FALSE | 24.36 |
| Q6FI13 | 81 | PBHLQLAIBNDE | FALSE | TRUE | FALSE | 18.81 |
| Q6FI13 | 82 | BHLQLAIBNDEE | FALSE | TRUE | FALSE | 10.35 |
| Q6FI13 | 84 | LQLAIBNDEELN | FALSE | TRUE | FALSE | 12.7  |
| Q6FI13 | 85 | QLAIBNDEELNK | FALSE | TRUE | FALSE | 12.24 |
| Q6FI13 | 86 | LAIBNDEELNKL | FALSE | TRUE | FALSE | 10.95 |
| Q8IUE6 | 16 | KSBSSBAGLQFP | FALSE | TRUE | FALSE | 12.75 |
| Q8IUE6 | 17 | SBSSBAGLQFPV | FALSE | TRUE | FALSE | 41.02 |
| Q8IUE6 | 18 | BSSBAGLQFPVG | FALSE | TRUE | FALSE | 36.47 |
| Q8IUE6 | 19 | SSBAGLQFPVGB | FALSE | TRUE | FALSE | 35.53 |
| Q8IUE6 | 20 | SBAGLQFPVGBV | FALSE | TRUE | FALSE | 34.17 |
| Q8IUE6 | 21 | BAGLQFPVGBVH | FALSE | TRUE | FALSE | 11.02 |
| Q8IUE6 | 31 | VHLLBKGNAYAE | FALSE | TRUE | FALSE | 11.94 |
| Q8IUE6 | 32 | HLLBKGNAYAE  | FALSE | TRUE | FALSE | 40.27 |
| Q8IUE6 | 33 | LLBKGNAYAEV  | FALSE | TRUE | FALSE | 50.69 |
| Q8IUE6 | 34 | LLBKGNAYAEV  | FALSE | TRUE | FALSE | 36.2  |
| Q8IUE6 | 35 | LBKGNAYAEVGA | FALSE | TRUE | FALSE | 24.44 |
| Q8IUE6 | 36 | BKGNAYAEVGA  | FALSE | TRUE | FALSE | 17.49 |
| Q8IUE6 | 40 | YAEVGA       | FALSE | TRUE | FALSE | 14.42 |
| Q8IUE6 | 78 | BIIPBHLQLAVB | FALSE | TRUE | FALSE | 11.43 |
| Q8IUE6 | 79 | IIPBHLQLAVBN | FALSE | TRUE | FALSE | 17.58 |
| Q8IUE6 | 80 | IPBHLQLAVBND | FALSE | TRUE | FALSE | 25.61 |
| Q8IUE6 | 81 | PBHLQLAVBNDE | FALSE | TRUE | FALSE | 22.24 |
| Q8IUE6 | 82 | BHLQLAVBNDEE | FALSE | TRUE | FALSE | 12.02 |
| Q8IUE6 | 85 | QLAVBNDEELNK | FALSE | TRUE | FALSE | 11.88 |
| Q16777 | 15 | AKSBSSBAGLQF | FALSE | TRUE | FALSE | 12.15 |
| Q16777 | 15 | AKSBSSBAGLQF | FALSE | TRUE | FALSE | 10.1  |
| Q16777 | 16 | KSBSSBAGLQFP | FALSE | TRUE | FALSE | 13.05 |
| Q16777 | 16 | KSBSSBAGLQFP | FALSE | TRUE | FALSE | 11.43 |
| Q16777 | 17 | SBSSBAGLQFPV | FALSE | TRUE | FALSE | 39.28 |
| Q16777 | 17 | SBSSBAGLQFPV | FALSE | TRUE | FALSE | 39.67 |
| Q16777 | 18 | BSSBAGLQFPVG | FALSE | TRUE | FALSE | 42.07 |
| Q16777 | 18 | BSSBAGLQFPVG | FALSE | TRUE | FALSE | 37.39 |
| Q16777 | 19 | SSBAGLQFPVGB | FALSE | TRUE | FALSE | 32.2  |
| Q16777 | 19 | SSBAGLQFPVGB | FALSE | TRUE | FALSE | 37.25 |
| Q16777 | 20 | SBAGLQFPVGBV | FALSE | TRUE | FALSE | 25.39 |
| Q16777 | 20 | SBAGLQFPVGBV | FALSE | TRUE | FALSE | 29.07 |

|        |    |               |       |      |       |       |
|--------|----|---------------|-------|------|-------|-------|
| Q16777 | 21 | BAGLQFPVGBVH  | FALSE | TRUE | FALSE | 11.07 |
| Q16777 | 31 | VHLLBKGNYAE   | FALSE | TRUE | FALSE | 11.44 |
| Q16777 | 31 | VHLLBKGNYAE   | FALSE | TRUE | FALSE | 11.14 |
| Q16777 | 32 | HLLBKGNYAEB   | FALSE | TRUE | FALSE | 47.56 |
| Q16777 | 32 | HLLBKGNYAEB   | FALSE | TRUE | FALSE | 45.32 |
| Q16777 | 33 | BLLBKGNYAEBV  | FALSE | TRUE | FALSE | 52.8  |
| Q16777 | 33 | BLLBKGNYAEBV  | FALSE | TRUE | FALSE | 52.74 |
| Q16777 | 34 | LLBKGNYAEBVG  | FALSE | TRUE | FALSE | 41.35 |
| Q16777 | 34 | LLBKGNYAEBVG  | FALSE | TRUE | FALSE | 38.45 |
| Q16777 | 35 | LBKGNYAEBVGA  | FALSE | TRUE | FALSE | 27.57 |
| Q16777 | 35 | LBKGNYAEBVGA  | FALSE | TRUE | FALSE | 26.44 |
| Q16777 | 36 | BKGNYAEBVGAG  | FALSE | TRUE | FALSE | 18.57 |
| Q16777 | 36 | BKGNYAEBVGAG  | FALSE | TRUE | FALSE | 18.46 |
| Q16777 | 37 | KGNYAEBVGAGA  | FALSE | TRUE | FALSE | 10.02 |
| Q16777 | 40 | YAEBVGAGAPVY  | FALSE | TRUE | FALSE | 15.56 |
| Q16777 | 40 | YAEBVGAGAPVY  | FALSE | TRUE | FALSE | 14.66 |
| Q16777 | 76 | KTBIIPBHLQLA  | FALSE | TRUE | FALSE | 10.01 |
| Q16777 | 79 | IIPBHLQLAIBN  | FALSE | TRUE | FALSE | 13.7  |
| Q16777 | 79 | IIPBHLQLAIBN  | FALSE | TRUE | FALSE | 12.95 |
| Q16777 | 80 | IPBHLQLAIBND  | FALSE | TRUE | FALSE | 26.1  |
| Q16777 | 80 | IPBHLQLAIBND  | FALSE | TRUE | FALSE | 26.54 |
| Q16777 | 81 | PBHLQLAIBNDE  | FALSE | TRUE | FALSE | 19.66 |
| Q16777 | 81 | PBHLQLAIBNDE  | FALSE | TRUE | FALSE | 18.89 |
| Q16777 | 82 | BHLQLAIBNDEE  | FALSE | TRUE | FALSE | 11.63 |
| Q16777 | 82 | BHLQLAIBNDEE  | FALSE | TRUE | FALSE | 11.74 |
| Q16777 | 84 | LQLAIBNDEELN  | FALSE | TRUE | FALSE | 10.64 |
| Q16777 | 84 | LQLAIBNDEELN  | FALSE | TRUE | FALSE | 10.18 |
| Q16777 | 85 | QLAIBNDEELNK  | FALSE | TRUE | FALSE | 10.61 |
| Q16777 | 85 | QLAIBNDEELNK  | FALSE | TRUE | FALSE | 11.44 |
| Q16777 | 86 | LAIBNDEELNKL  | FALSE | TRUE | FALSE | 11.73 |
| Q16777 | 86 | LAIBNDEELNKL  | FALSE | TRUE | FALSE | 10.73 |
| Q7L7L0 | 16 | KSBSSBAGLQFP  | FALSE | TRUE | FALSE | 12.75 |
| Q7L7L0 | 17 | SBSSBAGLQFPV  | FALSE | TRUE | FALSE | 41.02 |
| Q7L7L0 | 18 | BSSBAGLQFPVG  | FALSE | TRUE | FALSE | 36.47 |
| Q7L7L0 | 19 | SSBAGLQFPVGB  | FALSE | TRUE | FALSE | 35.53 |
| Q7L7L0 | 20 | SBAGLQFPVGBV  | FALSE | TRUE | FALSE | 34.17 |
| Q7L7L0 | 21 | BAGLQFPVGBVH  | FALSE | TRUE | FALSE | 11.02 |
| Q7L7L0 | 31 | VHLLBKGNYSE   | FALSE | TRUE | FALSE | 18.61 |
| Q7L7L0 | 32 | HLLBKGNYSEB   | FALSE | TRUE | FALSE | 52.06 |
| Q7L7L0 | 33 | BLLBKGNYSEBV  | FALSE | TRUE | FALSE | 44.82 |
| Q7L7L0 | 34 | LLBKGNYSEBVG  | FALSE | TRUE | FALSE | 40.91 |
| Q7L7L0 | 35 | LBKGNYSEBVGAG | FALSE | TRUE | FALSE | 25.67 |
| Q7L7L0 | 36 | BKGNYSEBVGAG  | FALSE | TRUE | FALSE | 18.16 |
| Q7L7L0 | 37 | KGNYSEBVGAGA  | FALSE | TRUE | FALSE | 11.37 |
| Q7L7L0 | 38 | GNYSEBVGAGAP  | FALSE | TRUE | FALSE | 10.33 |
| Q7L7L0 | 39 | NYSEBVGAGAPV  | FALSE | TRUE | FALSE | 17.1  |
| Q7L7L0 | 40 | YSEBVGAGAPVY  | FALSE | TRUE | FALSE | 22.62 |
| Q7L7L0 | 79 | IIPBHLQLAIBN  | FALSE | TRUE | FALSE | 11.95 |
| Q7L7L0 | 80 | IPBHLQLAIBND  | FALSE | TRUE | FALSE | 24.36 |
| Q7L7L0 | 81 | PBHLQLAIBNDE  | FALSE | TRUE | FALSE | 18.81 |
| Q7L7L0 | 82 | BHLQLAIBNDEE  | FALSE | TRUE | FALSE | 10.35 |
| Q7L7L0 | 84 | LQLAIBNDEELN  | FALSE | TRUE | FALSE | 12.7  |

|            |     |              |       |      |       |       |
|------------|-----|--------------|-------|------|-------|-------|
| Q7L7L0     | 85  | QLAIBNDEELNK | FALSE | TRUE | FALSE | 12.24 |
| Q7L7L0     | 86  | LAIBNDEELNKL | FALSE | TRUE | FALSE | 10.95 |
| A0A024QZP6 | 10  | MSKLSBSABAGV | FALSE | TRUE | FALSE | 26.9  |
| A0A024QZP6 | 11  | SKLSBSABAGVI | FALSE | TRUE | FALSE | 30.24 |
| A0A024QZP6 | 13  | LSBSABAGVIFP | FALSE | TRUE | FALSE | 21.46 |
| A0A024QZP6 | 14  | SBSABAGVIFPV | FALSE | TRUE | FALSE | 20.26 |
| A0A024QZP6 | 15  | BSABAGVIFPVG | FALSE | TRUE | FALSE | 18.12 |
| A0A024QZP6 | 16  | SABAGVIFPVGB | FALSE | TRUE | FALSE | 24.04 |
| A0A024QZP6 | 126 | TILSPPPEKBGB | FALSE | TRUE | FALSE | 20.76 |
| A0A024QZP6 | 129 | SPPPEKBGBKAT | FALSE | TRUE | FALSE | 14.56 |
| A0A024QZP6 | 308 | SVAFFPPFSGBN | FALSE | TRUE | FALSE | 14.61 |
| A0A024R017 | 16  | KSBSSBAGLQFP | FALSE | TRUE | FALSE | 12.75 |
| A0A024R017 | 17  | SBSSBAGLQFPV | FALSE | TRUE | FALSE | 41.02 |
| A0A024R017 | 18  | BSSBAGLQFPVG | FALSE | TRUE | FALSE | 36.47 |
| A0A024R017 | 19  | SSBAGLQFPVGB | FALSE | TRUE | FALSE | 35.53 |
| A0A024R017 | 20  | SBAGLQFPVGBV | FALSE | TRUE | FALSE | 34.17 |
| A0A024R017 | 21  | BAGLQFPVGBVH | FALSE | TRUE | FALSE | 11.02 |
| A0A024R017 | 31  | VHLLBKGNYAEB | FALSE | TRUE | FALSE | 11.94 |
| A0A024R017 | 32  | HLLBKGNYAEB  | FALSE | TRUE | FALSE | 40.27 |
| A0A024R017 | 33  | BLLBKGNYAEBV | FALSE | TRUE | FALSE | 50.69 |
| A0A024R017 | 34  | LLBKGNYAEBVG | FALSE | TRUE | FALSE | 36.2  |
| A0A024R017 | 35  | LBKGNYAEBVGA | FALSE | TRUE | FALSE | 24.44 |
| A0A024R017 | 36  | BKGNYAEBVGAG | FALSE | TRUE | FALSE | 17.49 |
| A0A024R017 | 40  | YAEBVGAGAPVY | FALSE | TRUE | FALSE | 14.42 |
| A0A024R017 | 79  | IIPBHLQLAIBN | FALSE | TRUE | FALSE | 11.95 |
| A0A024R017 | 80  | IPBHLQLAIBND | FALSE | TRUE | FALSE | 24.36 |
| A0A024R017 | 81  | PBHLQLAIBNDE | FALSE | TRUE | FALSE | 18.81 |
| A0A024R017 | 82  | BHLQLAIBNDEE | FALSE | TRUE | FALSE | 10.35 |
| A0A024R017 | 84  | LQLAIBNDEELN | FALSE | TRUE | FALSE | 12.7  |
| A0A024R017 | 85  | QLAIBNDEELNK | FALSE | TRUE | FALSE | 12.24 |
| A0A024R017 | 86  | LAIBNDEELNKL | FALSE | TRUE | FALSE | 10.95 |
| A0A024RAS2 | 16  | KSBSSBAGLQFP | FALSE | TRUE | FALSE | 12.75 |
| A0A024RAS2 | 17  | SBSSBAGLQFPV | FALSE | TRUE | FALSE | 41.02 |
| A0A024RAS2 | 18  | BSSBAGLQFPVG | FALSE | TRUE | FALSE | 36.47 |
| A0A024RAS2 | 19  | SSBAGLQFPVGB | FALSE | TRUE | FALSE | 35.53 |
| A0A024RAS2 | 20  | SBAGLQFPVGBV | FALSE | TRUE | FALSE | 34.17 |
| A0A024RAS2 | 21  | BAGLQFPVGBVH | FALSE | TRUE | FALSE | 11.02 |
| A0A024RAS2 | 31  | VHLLBKGNYAEB | FALSE | TRUE | FALSE | 11.94 |
| A0A024RAS2 | 32  | HLLBKGNYAEB  | FALSE | TRUE | FALSE | 40.27 |
| A0A024RAS2 | 33  | BLLBKGNYAEBV | FALSE | TRUE | FALSE | 50.69 |
| A0A024RAS2 | 34  | LLBKGNYAEBVG | FALSE | TRUE | FALSE | 36.2  |
| A0A024RAS2 | 35  | LBKGNYAEBVGA | FALSE | TRUE | FALSE | 24.44 |
| A0A024RAS2 | 36  | BKGNYAEBVGAG | FALSE | TRUE | FALSE | 17.49 |
| A0A024RAS2 | 40  | YAEBVGAGAPVY | FALSE | TRUE | FALSE | 14.42 |
| A0A024RAS2 | 79  | IIPBHLQLAIBN | FALSE | TRUE | FALSE | 11.95 |
| A0A024RAS2 | 80  | IPBHLQLAIBND | FALSE | TRUE | FALSE | 24.36 |
| A0A024RAS2 | 81  | PBHLQLAIBNDE | FALSE | TRUE | FALSE | 18.81 |
| A0A024RAS2 | 82  | BHLQLAIBNDEE | FALSE | TRUE | FALSE | 10.35 |
| A0A024RAS2 | 84  | LQLAIBNDEELN | FALSE | TRUE | FALSE | 12.7  |
| A0A024RAS2 | 85  | QLAIBNDEELNK | FALSE | TRUE | FALSE | 12.24 |
| A0A024RAS2 | 86  | LAIBNDEELNKL | FALSE | TRUE | FALSE | 10.95 |
| A0A0U1RR32 | 15  | AKTBSSBAGLQF | FALSE | TRUE | FALSE | 12.14 |

|            |     |              |       |      |       |       |
|------------|-----|--------------|-------|------|-------|-------|
| A0A0U1RR32 | 16  | KTBSSBAGLQFP | FALSE | TRUE | FALSE | 22.31 |
| A0A0U1RR32 | 17  | TBSSBAGLQFPV | FALSE | TRUE | FALSE | 44.52 |
| A0A0U1RR32 | 18  | BSSBAGLQFPVG | FALSE | TRUE | FALSE | 36.47 |
| A0A0U1RR32 | 19  | SSBAGLQFPVGB | FALSE | TRUE | FALSE | 35.53 |
| A0A0U1RR32 | 20  | SBAGLQFPVGBV | FALSE | TRUE | FALSE | 34.17 |
| A0A0U1RR32 | 21  | BAGLQFPVGBVH | FALSE | TRUE | FALSE | 11.02 |
| A0A0U1RR32 | 31  | VHLLBKGNYS   | FALSE | TRUE | FALSE | 18.61 |
| A0A0U1RR32 | 32  | HBLLBKGNYS   | FALSE | TRUE | FALSE | 52.06 |
| A0A0U1RR32 | 33  | BLLBKGNYS    | FALSE | TRUE | FALSE | 44.82 |
| A0A0U1RR32 | 34  | LLBKGNYS     | FALSE | TRUE | FALSE | 40.91 |
| A0A0U1RR32 | 35  | LBKGNYS      | FALSE | TRUE | FALSE | 25.67 |
| A0A0U1RR32 | 36  | BKGNYS       | FALSE | TRUE | FALSE | 18.16 |
| A0A0U1RR32 | 37  | KGNYS        | FALSE | TRUE | FALSE | 11.37 |
| A0A0U1RR32 | 38  | GNYS         | FALSE | TRUE | FALSE | 10.33 |
| A0A0U1RR32 | 39  | NYSEBVGAGAPV | FALSE | TRUE | FALSE | 17.1  |
| A0A0U1RR32 | 40  | YSEBVGAGAPVY | FALSE | TRUE | FALSE | 22.62 |
| A0A0U1RR32 | 79  | IIPBHLQLAIBN | FALSE | TRUE | FALSE | 11.95 |
| A0A0U1RR32 | 80  | IPBHLQLAIBND | FALSE | TRUE | FALSE | 24.36 |
| A0A0U1RR32 | 81  | PBHLQLAIBNDE | FALSE | TRUE | FALSE | 18.81 |
| A0A0U1RR32 | 82  | BHLQLAIBNDEE | FALSE | TRUE | FALSE | 10.35 |
| A0A0U1RR32 | 84  | LQLAIBNDEELN | FALSE | TRUE | FALSE | 12.7  |
| A0A0U1RR32 | 85  | QLAIBNDEELNK | FALSE | TRUE | FALSE | 12.24 |
| A0A0U1RR32 | 86  | LAIBNDEELNKL | FALSE | TRUE | FALSE | 10.95 |
| A0A0U1RR32 | 129 | GFBSSQWLVP   | FALSE | TRUE | FALSE | 10.41 |
| A0A0U1RR32 | 139 | SBLLASPBVGKB | FALSE | TRUE | FALSE | 20.89 |
| A0A0U1RR32 | 140 | BLLASPBVGKBH | FALSE | TRUE | FALSE | 12.32 |
| A0A0U1RR32 | 141 | LLASPBVGKBHA | FALSE | TRUE | FALSE | 14.42 |
| A0A0U1RR32 | 142 | LASPBVGKBHAS | FALSE | TRUE | FALSE | 15.9  |
| A0A0U1RR32 | 143 | ASPBVGKBHASS | FALSE | TRUE | FALSE | 15.09 |
| A0A0U1RR32 | 144 | SPBVGKBHASSW | FALSE | TRUE | FALSE | 19.49 |
| A0A0U1RR32 | 145 | PBVGKBHASSWP | FALSE | TRUE | FALSE | 11.6  |
| A0A0U1RR32 | 146 | BVGKBHASSWPP | FALSE | TRUE | FALSE | 14.55 |
| A0A0U1RR32 | 147 | VGKBHASSWPPB | FALSE | TRUE | FALSE | 15.92 |
| A0A0U1RR32 | 148 | GKBHASSWPPBL | FALSE | TRUE | FALSE | 12.94 |
| A0A0U1RR32 | 150 | BHASSWPPBLLE | FALSE | TRUE | FALSE | 11.79 |
| A0A0U1RR32 | 151 | HASSWPPBLLEB | FALSE | TRUE | FALSE | 11.91 |
| A0A0U1RR32 | 155 | WPPBLLEBALQP | FALSE | TRUE | FALSE | 14.21 |
| A0A0U1RRH7 | 15  | AKTBSSBAGLQF | FALSE | TRUE | FALSE | 12.14 |
| A0A0U1RRH7 | 16  | KTBSSBAGLQFP | FALSE | TRUE | FALSE | 22.31 |
| A0A0U1RRH7 | 17  | TBSSBAGLQFPV | FALSE | TRUE | FALSE | 44.52 |
| A0A0U1RRH7 | 18  | BSSBAGLQFPVG | FALSE | TRUE | FALSE | 36.47 |
| A0A0U1RRH7 | 19  | SSBAGLQFPVGB | FALSE | TRUE | FALSE | 35.53 |
| A0A0U1RRH7 | 20  | SBAGLQFPVGBV | FALSE | TRUE | FALSE | 34.17 |
| A0A0U1RRH7 | 21  | BAGLQFPVGBVH | FALSE | TRUE | FALSE | 11.02 |
| A0A0U1RRH7 | 31  | VHLLBKGNYS   | FALSE | TRUE | FALSE | 18.61 |
| A0A0U1RRH7 | 32  | HBLLBKGNYS   | FALSE | TRUE | FALSE | 52.06 |
| A0A0U1RRH7 | 33  | BLLBKGNYS    | FALSE | TRUE | FALSE | 44.82 |
| A0A0U1RRH7 | 34  | LLBKGNYS     | FALSE | TRUE | FALSE | 40.91 |
| A0A0U1RRH7 | 35  | LBKGNYS      | FALSE | TRUE | FALSE | 25.67 |
| A0A0U1RRH7 | 36  | BKGNYS       | FALSE | TRUE | FALSE | 18.16 |
| A0A0U1RRH7 | 37  | KGNYS        | FALSE | TRUE | FALSE | 11.37 |
| A0A0U1RRH7 | 38  | GNYS         | FALSE | TRUE | FALSE | 10.33 |

|            |     |              |       |      |       |       |
|------------|-----|--------------|-------|------|-------|-------|
| A0A0U1RRH7 | 39  | NYSEBVGAGAPV | FALSE | TRUE | FALSE | 17.1  |
| A0A0U1RRH7 | 40  | YSEBVGAGAPVY | FALSE | TRUE | FALSE | 22.62 |
| A0A0U1RRH7 | 79  | IIPBHLQLAIBN | FALSE | TRUE | FALSE | 11.95 |
| A0A0U1RRH7 | 80  | IPBHLQLAIBND | FALSE | TRUE | FALSE | 24.36 |
| A0A0U1RRH7 | 81  | PBHLQLAIBNDE | FALSE | TRUE | FALSE | 18.81 |
| A0A0U1RRH7 | 82  | BHLQLAIBNDEE | FALSE | TRUE | FALSE | 10.35 |
| A0A0U1RRH7 | 84  | LQLAIBNDEELN | FALSE | TRUE | FALSE | 12.7  |
| A0A0U1RRH7 | 85  | QLAIBNDEELNK | FALSE | TRUE | FALSE | 12.24 |
| A0A0U1RRH7 | 86  | LAIBNDEELNKL | FALSE | TRUE | FALSE | 10.95 |
| A0A0U1RRH7 | 130 | GFBSSQWLVPST | FALSE | TRUE | FALSE | 10.41 |
| A0A0U1RRH7 | 140 | SBLLASPBVGKB | FALSE | TRUE | FALSE | 20.89 |
| A0A0U1RRH7 | 141 | BLLASPBVGKBH | FALSE | TRUE | FALSE | 12.32 |
| A0A0U1RRH7 | 142 | LLASPBVGKBHA | FALSE | TRUE | FALSE | 14.42 |
| A0A0U1RRH7 | 143 | LASPBVGKBHAS | FALSE | TRUE | FALSE | 15.9  |
| A0A0U1RRH7 | 144 | ASPBVGKBHASS | FALSE | TRUE | FALSE | 15.09 |
| A0A0U1RRH7 | 145 | SPBVGKBHASSW | FALSE | TRUE | FALSE | 19.49 |
| A0A0U1RRH7 | 146 | PBVGKBHASSWP | FALSE | TRUE | FALSE | 11.6  |
| A0A0U1RRH7 | 147 | BVGKBHASSWPP | FALSE | TRUE | FALSE | 14.55 |
| A0A0U1RRH7 | 148 | VGKBHASSWPPB | FALSE | TRUE | FALSE | 15.92 |
| A0A0U1RRH7 | 149 | GKBHASSWPPBL | FALSE | TRUE | FALSE | 12.94 |
| A0A0U1RRH7 | 151 | BHASSWPPBLLE | FALSE | TRUE | FALSE | 11.79 |
| A0A0U1RRH7 | 152 | HASSWPPBLLEB | FALSE | TRUE | FALSE | 11.91 |
| A0A0U1RRH7 | 156 | WPPBLLEBALQP | FALSE | TRUE | FALSE | 14.21 |
| A2RUA4     | 17  | SBSSBAGPQPPA | FALSE | TRUE | FALSE | 29.53 |
| A2RUA4     | 18  | BSSBAGPQPPAG | FALSE | TRUE | FALSE | 29.18 |
| A2RUA4     | 19  | SSBAGPQPPAGB | FALSE | TRUE | FALSE | 25.69 |
| A2RUA4     | 20  | SBAGPQPPAGBA | FALSE | TRUE | FALSE | 15.75 |
| A2RUA4     | 21  | BAGPQPPAGBAH | FALSE | TRUE | FALSE | 14.58 |
| A2RUA4     | 22  | AGPQPPAGBAHB | FALSE | TRUE | FALSE | 10.57 |
| A2RUA4     | 23  | GPQPPAGBAHBP | FALSE | TRUE | FALSE | 11.36 |
| A2RUA4     | 25  | QPPAGBAHBPPB | FALSE | TRUE | FALSE | 13.21 |
| A2RUA4     | 32  | HBPPBKGNAEB  | FALSE | TRUE | FALSE | 15.42 |
| A2RUA4     | 33  | BPPBKGNAEBV  | FALSE | TRUE | FALSE | 10.37 |
| A2RUA4     | 78  | BIIPBHLQLAVB | FALSE | TRUE | FALSE | 11.43 |
| A2RUA4     | 79  | IIPBHLQLAVBN | FALSE | TRUE | FALSE | 17.58 |
| A2RUA4     | 80  | IPBHLQLAVBND | FALSE | TRUE | FALSE | 25.61 |
| A2RUA4     | 81  | PBHLQLAVBNDE | FALSE | TRUE | FALSE | 22.24 |
| A2RUA4     | 82  | BHLQLAVBNDEE | FALSE | TRUE | FALSE | 12.02 |
| A2RUA4     | 85  | QLAVBNDEELNK | FALSE | TRUE | FALSE | 11.88 |
| A3KPC7     | 15  | AKTBSSBAGLQF | FALSE | TRUE | FALSE | 12.14 |
| A3KPC7     | 16  | KTBSSBAGLQFP | FALSE | TRUE | FALSE | 22.31 |
| A3KPC7     | 17  | TBSSBAGLQFPV | FALSE | TRUE | FALSE | 44.52 |
| A3KPC7     | 18  | BSSBAGLQFPVG | FALSE | TRUE | FALSE | 36.47 |
| A3KPC7     | 19  | SSBAGLQFPVGB | FALSE | TRUE | FALSE | 35.53 |
| A3KPC7     | 20  | SBAGLQFPVGBV | FALSE | TRUE | FALSE | 34.17 |
| A3KPC7     | 21  | BAGLQFPVGBVH | FALSE | TRUE | FALSE | 11.02 |
| A3KPC7     | 31  | VHLLBKGNYAE  | FALSE | TRUE | FALSE | 11.94 |
| A3KPC7     | 32  | HBLLBKGNYAEB | FALSE | TRUE | FALSE | 40.27 |
| A3KPC7     | 33  | BLLBKGNYAEBV | FALSE | TRUE | FALSE | 50.69 |
| A3KPC7     | 34  | LLBKGNYAEBVG | FALSE | TRUE | FALSE | 36.2  |
| A3KPC7     | 35  | LBKGNYAEBVGA | FALSE | TRUE | FALSE | 24.44 |
| A3KPC7     | 36  | BKGNYAEBVGAG | FALSE | TRUE | FALSE | 17.49 |

|        |    |              |       |      |       |       |
|--------|----|--------------|-------|------|-------|-------|
| A3KPC7 | 40 | YAEBVGAGAPVY | FALSE | TRUE | FALSE | 14.42 |
| A3KPC7 | 79 | IIPBHLQLAIBN | FALSE | TRUE | FALSE | 11.95 |
| A3KPC7 | 80 | IPBHLQLAIBND | FALSE | TRUE | FALSE | 24.36 |
| A3KPC7 | 81 | PBHLQLAIBNDE | FALSE | TRUE | FALSE | 18.81 |
| A3KPC7 | 82 | BHLQLAIBNDEE | FALSE | TRUE | FALSE | 10.35 |
| A3KPC7 | 84 | LQLAIBNDEELN | FALSE | TRUE | FALSE | 12.7  |
| A3KPC7 | 85 | QLAIBNDEELNK | FALSE | TRUE | FALSE | 12.24 |
| A3KPC7 | 86 | LAIBNDEELNKL | FALSE | TRUE | FALSE | 10.95 |
| A4FTV9 | 15 | AKTBSSBAGLQF | FALSE | TRUE | FALSE | 12.14 |
| A4FTV9 | 16 | KTBSSBAGLQFP | FALSE | TRUE | FALSE | 22.31 |
| A4FTV9 | 17 | TBSSBAGLQFPV | FALSE | TRUE | FALSE | 44.52 |
| A4FTV9 | 18 | BSSBAGLQFPVG | FALSE | TRUE | FALSE | 36.47 |
| A4FTV9 | 19 | SSBAGLQFPVGB | FALSE | TRUE | FALSE | 35.53 |
| A4FTV9 | 20 | SBAGLQFPVGBV | FALSE | TRUE | FALSE | 34.17 |
| A4FTV9 | 21 | BAGLQFPVGBVH | FALSE | TRUE | FALSE | 11.02 |
| A4FTV9 | 31 | VHLLBKGNYAEB | FALSE | TRUE | FALSE | 11.94 |
| A4FTV9 | 32 | HBLLBKGNYAEB | FALSE | TRUE | FALSE | 40.27 |
| A4FTV9 | 33 | BLLBKGNYAEBV | FALSE | TRUE | FALSE | 50.69 |
| A4FTV9 | 34 | LLBKGNYAEBVG | FALSE | TRUE | FALSE | 36.2  |
| A4FTV9 | 35 | LBKGNYAEBVGA | FALSE | TRUE | FALSE | 24.44 |
| A4FTV9 | 36 | BKGNYAEBVGAG | FALSE | TRUE | FALSE | 17.49 |
| A4FTV9 | 40 | YAEBVGAGAPVY | FALSE | TRUE | FALSE | 14.42 |
| A4FTV9 | 79 | IIPBHLQLAIBN | FALSE | TRUE | FALSE | 11.95 |
| A4FTV9 | 80 | IPBHLQLAIBND | FALSE | TRUE | FALSE | 24.36 |
| A4FTV9 | 81 | PBHLQLAIBNDE | FALSE | TRUE | FALSE | 18.81 |
| A4FTV9 | 82 | BHLQLAIBNDEE | FALSE | TRUE | FALSE | 10.35 |
| A4FTV9 | 84 | LQLAIBNDEELN | FALSE | TRUE | FALSE | 12.7  |
| A4FTV9 | 85 | QLAIBNDEELNK | FALSE | TRUE | FALSE | 12.24 |
| A4FTV9 | 86 | LAIBNDEELNKL | FALSE | TRUE | FALSE | 10.95 |
| B2R5B3 | 15 | AKTBSSBAGLQF | FALSE | TRUE | FALSE | 12.14 |
| B2R5B3 | 16 | KTBSSBAGLQFP | FALSE | TRUE | FALSE | 22.31 |
| B2R5B3 | 17 | TBSSBAGLQFPV | FALSE | TRUE | FALSE | 44.52 |
| B2R5B3 | 18 | BSSBAGLQFPVG | FALSE | TRUE | FALSE | 36.47 |
| B2R5B3 | 19 | SSBAGLQFPVGB | FALSE | TRUE | FALSE | 35.53 |
| B2R5B3 | 20 | SBAGLQFPVGBV | FALSE | TRUE | FALSE | 34.17 |
| B2R5B3 | 28 | VGBVBLLBKGN  | FALSE | TRUE | FALSE | 11.23 |
| B2R5B3 | 30 | BVBLLBKGNYA  | FALSE | TRUE | FALSE | 10.39 |
| B2R5B3 | 31 | VBLLBKGNYAEB | FALSE | TRUE | FALSE | 12.05 |
| B2R5B3 | 32 | BBLLBKGNYAEB | FALSE | TRUE | FALSE | 41.46 |
| B2R5B3 | 33 | BLLBKGNYAEBV | FALSE | TRUE | FALSE | 50.69 |
| B2R5B3 | 34 | LLBKGNYAEBVG | FALSE | TRUE | FALSE | 36.2  |
| B2R5B3 | 35 | LBKGNYAEBVGA | FALSE | TRUE | FALSE | 24.44 |
| B2R5B3 | 36 | BKGNYAEBVGAG | FALSE | TRUE | FALSE | 17.49 |
| B2R5B3 | 40 | YAEBVGAGAPVY | FALSE | TRUE | FALSE | 14.42 |
| B2R5B3 | 79 | IIPBHLQLAIBN | FALSE | TRUE | FALSE | 11.95 |
| B2R5B3 | 80 | IPBHLQLAIBND | FALSE | TRUE | FALSE | 24.36 |
| B2R5B3 | 81 | PBHLQLAIBNDE | FALSE | TRUE | FALSE | 18.81 |
| B2R5B3 | 82 | BHLQLAIBNDEE | FALSE | TRUE | FALSE | 10.35 |
| B2R5B3 | 84 | LQLAIBNDEELN | FALSE | TRUE | FALSE | 12.7  |
| B2R5B3 | 85 | QLAIBNDEELNK | FALSE | TRUE | FALSE | 12.24 |
| B2R5B3 | 86 | LAIBNDEELNKL | FALSE | TRUE | FALSE | 10.95 |
| B2R5B6 | 15 | AKTBSSBAGLQF | FALSE | TRUE | FALSE | 12.14 |

|        |     |              |       |      |       |       |
|--------|-----|--------------|-------|------|-------|-------|
| B2R5B6 | 16  | KTBSBAGLQFP  | FALSE | TRUE | FALSE | 22.31 |
| B2R5B6 | 17  | TBSSBAGLQFPV | FALSE | TRUE | FALSE | 44.52 |
| B2R5B6 | 18  | BSSBAGLQFPVG | FALSE | TRUE | FALSE | 36.47 |
| B2R5B6 | 19  | SSBAGLQFPVGB | FALSE | TRUE | FALSE | 35.53 |
| B2R5B6 | 20  | SBAGLQFPVGBV | FALSE | TRUE | FALSE | 34.17 |
| B2R5B6 | 21  | BAGLQFPVGBVH | FALSE | TRUE | FALSE | 11.02 |
| B2R5B6 | 31  | VHLLBKGNYS   | FALSE | TRUE | FALSE | 18.61 |
| B2R5B6 | 32  | HLLBKGNYS    | FALSE | TRUE | FALSE | 52.06 |
| B2R5B6 | 33  | LLBKGNYS     | FALSE | TRUE | FALSE | 44.82 |
| B2R5B6 | 34  | LLBKGNYS     | FALSE | TRUE | FALSE | 40.91 |
| B2R5B6 | 35  | LBKGNYS      | FALSE | TRUE | FALSE | 25.67 |
| B2R5B6 | 36  | BKGNYS       | FALSE | TRUE | FALSE | 18.16 |
| B2R5B6 | 37  | KGNYS        | FALSE | TRUE | FALSE | 11.37 |
| B2R5B6 | 38  | GNYS         | FALSE | TRUE | FALSE | 10.33 |
| B2R5B6 | 39  | NYSE         | FALSE | TRUE | FALSE | 17.1  |
| B2R5B6 | 40  | YSE          | FALSE | TRUE | FALSE | 22.62 |
| B2R5B6 | 79  | IIPBHLQLAIBN | FALSE | TRUE | FALSE | 11.95 |
| B2R5B6 | 80  | IPBHLQLAIBND | FALSE | TRUE | FALSE | 24.36 |
| B2R5B6 | 81  | PBHLQLAIBNDE | FALSE | TRUE | FALSE | 18.81 |
| B2R5B6 | 82  | BHLQLAIBNDEE | FALSE | TRUE | FALSE | 10.35 |
| B2R5B6 | 84  | LQLAIBNDEELN | FALSE | TRUE | FALSE | 12.7  |
| B2R5B6 | 85  | QLAIBNDEELNK | FALSE | TRUE | FALSE | 12.24 |
| B2R5B6 | 86  | LAIBNDEELNKL | FALSE | TRUE | FALSE | 10.95 |
| B4DJC3 | 73  | VLELBKKNOPLE | FALSE | TRUE | FALSE | 13.17 |
| B4DJC3 | 74  | LELBKKNOPLEV | FALSE | TRUE | FALSE | 12.02 |
| B4DJC3 | 136 | SIAPPSIGSGBN | FALSE | TRUE | FALSE | 11.39 |
| B4DJC3 | 137 | IAPPSIGSGBNG | FALSE | TRUE | FALSE | 15.1  |
| B4DJC3 | 138 | APPSIGSGBNGF | FALSE | TRUE | FALSE | 21.91 |
| B4DJC3 | 139 | FPSIGSGBNGFP | FALSE | TRUE | FALSE | 30.24 |
| B4E0B3 | 13  | VHLLBKGNYS   | FALSE | TRUE | FALSE | 11.94 |
| B4E0B3 | 14  | HLLBKGNYS    | FALSE | TRUE | FALSE | 40.27 |
| B4E0B3 | 15  | LLBKGNYS     | FALSE | TRUE | FALSE | 50.69 |
| B4E0B3 | 16  | LLBKGNYS     | FALSE | TRUE | FALSE | 36.2  |
| B4E0B3 | 17  | LBKGNYS      | FALSE | TRUE | FALSE | 24.44 |
| B4E0B3 | 18  | BKGNYS       | FALSE | TRUE | FALSE | 17.49 |
| B4E0B3 | 22  | YAE          | FALSE | TRUE | FALSE | 14.42 |
| B4E0B3 | 61  | IIPBHLQLAIBN | FALSE | TRUE | FALSE | 11.95 |
| B4E0B3 | 62  | IPBHLQLAIBND | FALSE | TRUE | FALSE | 24.36 |
| B4E0B3 | 63  | PBHLQLAIBNDE | FALSE | TRUE | FALSE | 18.81 |
| B4E0B3 | 64  | BHLQLAIBNDEE | FALSE | TRUE | FALSE | 10.35 |
| B4E0B3 | 66  | LQLAIBNDEELN | FALSE | TRUE | FALSE | 12.7  |
| B4E0B3 | 67  | QLAIBNDEELNK | FALSE | TRUE | FALSE | 12.24 |
| B4E0B3 | 68  | LAIBNDEELNKL | FALSE | TRUE | FALSE | 10.95 |
| C9J0D1 | 17  | AVSBSQBAGLQF | FALSE | TRUE | FALSE | 25.01 |
| C9J0D1 | 18  | VSBSQBAGLQFP | FALSE | TRUE | FALSE | 36.79 |
| C9J0D1 | 19  | SBSQBAGLQFPV | FALSE | TRUE | FALSE | 35.2  |
| C9J0D1 | 20  | BSQBAGLQFPVG | FALSE | TRUE | FALSE | 31.55 |
| C9J0D1 | 21  | SQBAGLQFPVGB | FALSE | TRUE | FALSE | 30.4  |
| C9J0D1 | 22  | QBAGLQFPVGBI | FALSE | TRUE | FALSE | 36.46 |
| C9J0D1 | 29  | PVGBIHBHLKTB | FALSE | TRUE | FALSE | 15.96 |
| C9J0D1 | 30  | VGBIHBHLKTB  | FALSE | TRUE | FALSE | 22.4  |
| C9J0D1 | 31  | GBIHBHLKTB   | FALSE | TRUE | FALSE | 22.54 |



|        |    |              |       |      |       |       |
|--------|----|--------------|-------|------|-------|-------|
| C9J0D1 | 32 | BIHBHLKTBTT  | FALSE | TRUE | FALSE | 23.78 |
| C9J0D1 | 33 | IHBHLKTBTTSH | FALSE | TRUE | FALSE | 14.06 |
| C9J0D1 | 34 | HBHLKTBTTSHG | FALSE | TRUE | FALSE | 20.35 |
| C9J0D1 | 35 | BHLKTBTTSHGB | FALSE | TRUE | FALSE | 19.86 |
| C9J0D1 | 36 | HLKTBTTSHGBV | FALSE | TRUE | FALSE | 17.69 |
| C9J0D1 | 37 | LKTBTTSHGBVG | FALSE | TRUE | FALSE | 17.34 |
| C9J0D1 | 39 | TBTTSHGBVGAT | FALSE | TRUE | FALSE | 15.2  |
| C9J0D1 | 40 | BTTSHGBVGATA | FALSE | TRUE | FALSE | 16.32 |
| C9J0D1 | 79 | VKBITPBHLQLA | FALSE | TRUE | FALSE | 11.5  |
| C9J0D1 | 81 | BITPBHLQLAIB | FALSE | TRUE | FALSE | 13.26 |
| C9J0D1 | 82 | ITPBHLQLAIBG | FALSE | TRUE | FALSE | 15.28 |
| C9J0D1 | 83 | TPBHLQLAIBGD | FALSE | TRUE | FALSE | 28.24 |
| C9J0D1 | 84 | PBHLQLAIBGDE | FALSE | TRUE | FALSE | 29.41 |
| C9J0D1 | 85 | BHLQLAIBGDEE | FALSE | TRUE | FALSE | 19.3  |
| C9J0D1 | 86 | HLQLAIBGDEEL | FALSE | TRUE | FALSE | 13.51 |
| C9J0D1 | 87 | LQLAIBGDEELD | FALSE | TRUE | FALSE | 14.1  |
| C9J0D1 | 88 | QLAIBGDEELDS | FALSE | TRUE | FALSE | 14.66 |
| C9J0D1 | 89 | LAIBGDEELDSL | FALSE | TRUE | FALSE | 16.62 |
| C9J0D1 | 90 | AIBGDEELDSL  | FALSE | TRUE | FALSE | 11.19 |
| C9J0D1 | 91 | IBGDEELDSL   | FALSE | TRUE | FALSE | 10.25 |
| C9J386 | 17 | AVSBSQBAGLQV | FALSE | TRUE | FALSE | 39.19 |
| C9J386 | 18 | VSBSQBAGLQVL | FALSE | TRUE | FALSE | 31.47 |
| C9J386 | 19 | SBSQBAGLQVLE | FALSE | TRUE | FALSE | 31.38 |
| C9J386 | 20 | BSQBAGLQVLEL | FALSE | TRUE | FALSE | 20    |
| C9J386 | 21 | SQBAGLQVLELA | FALSE | TRUE | FALSE | 11.62 |
| C9J386 | 41 | VKBITPBHLQLA | FALSE | TRUE | FALSE | 11.5  |
| C9J386 | 43 | BITPBHLQLAIB | FALSE | TRUE | FALSE | 13.26 |
| C9J386 | 44 | ITPBHLQLAIBG | FALSE | TRUE | FALSE | 15.28 |
| C9J386 | 45 | TPBHLQLAIBGD | FALSE | TRUE | FALSE | 28.24 |
| C9J386 | 46 | PBHLQLAIBGDE | FALSE | TRUE | FALSE | 29.41 |
| C9J386 | 47 | BHLQLAIBGDEE | FALSE | TRUE | FALSE | 19.3  |
| C9J386 | 48 | HLQLAIBGDEEL | FALSE | TRUE | FALSE | 13.51 |
| C9J386 | 49 | LQLAIBGDEELD | FALSE | TRUE | FALSE | 14.1  |
| C9J386 | 50 | QLAIBGDEELDS | FALSE | TRUE | FALSE | 14.66 |
| C9J386 | 51 | LAIBGDEELDSL | FALSE | TRUE | FALSE | 16.62 |
| C9J386 | 52 | AIBGDEELDSL  | FALSE | TRUE | FALSE | 11.19 |
| C9J386 | 53 | IBGDEELDSL   | FALSE | TRUE | FALSE | 10.25 |
| E5RJU1 | 3  | PVGBIHBHLKTB | FALSE | TRUE | FALSE | 15.96 |
| E5RJU1 | 4  | VGBIHBHLKTB  | FALSE | TRUE | FALSE | 22.4  |
| E5RJU1 | 5  | GBIHBHLKTB   | FALSE | TRUE | FALSE | 22.54 |
| E5RJU1 | 6  | BIHBHLKTBTT  | FALSE | TRUE | FALSE | 23.78 |
| E5RJU1 | 7  | IHBHLKTBTTSH | FALSE | TRUE | FALSE | 14.06 |
| E5RJU1 | 8  | HBHLKTBTTSHG | FALSE | TRUE | FALSE | 20.35 |
| E5RJU1 | 9  | BHLKTBTTSHGB | FALSE | TRUE | FALSE | 19.86 |
| E5RJU1 | 10 | HLKTBTTSHGBV | FALSE | TRUE | FALSE | 17.69 |
| E5RJU1 | 11 | LKTBTTSHGBVG | FALSE | TRUE | FALSE | 17.34 |
| E5RJU1 | 13 | TBTTSHGBVGAT | FALSE | TRUE | FALSE | 15.2  |
| E5RJU1 | 14 | BTTSHGBVGATA | FALSE | TRUE | FALSE | 16.32 |
| H0YFX9 | 3  | YAEBVGAGAPVY | FALSE | TRUE | FALSE | 14.42 |
| H0YFX9 | 42 | IIPBHLQLAIBN | FALSE | TRUE | FALSE | 11.95 |
| H0YFX9 | 43 | IPBHLQLAIBND | FALSE | TRUE | FALSE | 24.36 |
| H0YFX9 | 44 | PBHLQLAIBNDE | FALSE | TRUE | FALSE | 18.81 |

|        |    |              |       |      |       |       |
|--------|----|--------------|-------|------|-------|-------|
| H0YFX9 | 45 | BHLQLAIBNDEE | FALSE | TRUE | FALSE | 10.35 |
| H0YFX9 | 47 | LQLAIBNDEELN | FALSE | TRUE | FALSE | 12.7  |
| H0YFX9 | 48 | QLAIBNDEELNK | FALSE | TRUE | FALSE | 12.24 |
| H0YFX9 | 49 | LAIBNDEELNKL | FALSE | TRUE | FALSE | 10.95 |
| P0C5Y9 | 1  | MPBBBBBBGSSG | FALSE | TRUE | FALSE | 10.5  |
| P0C5Y9 | 2  | PBBBBBBGSSGA | FALSE | TRUE | FALSE | 15.24 |
| P0C5Y9 | 3  | BBBBBBGSSGAG | FALSE | TRUE | FALSE | 15.66 |
| P0C5Y9 | 4  | BBBBBGSSGAGG | FALSE | TRUE | FALSE | 13.55 |
| P0C5Y9 | 5  | BBBBGSSGAGGB | FALSE | TRUE | FALSE | 20.78 |
| P0C5Y9 | 6  | BBBGSSGAGGBG | FALSE | TRUE | FALSE | 14.77 |
| P0C5Y9 | 8  | BGSSGAGGBGBT | FALSE | TRUE | FALSE | 15.05 |
| P0C5Y9 | 9  | GSSGAGGBGBTC | FALSE | TRUE | FALSE | 20.84 |
| P0C5Y9 | 10 | SSGAGGBGBTCS | FALSE | TRUE | FALSE | 23.8  |
| P0C5Y9 | 11 | SGAGGBGBTCSB | FALSE | TRUE | FALSE | 25.21 |
| P0C5Y9 | 12 | GAGGBGBTCSBT | FALSE | TRUE | FALSE | 33.36 |
| P0C5Y9 | 13 | AGGBGBTCSBTV | FALSE | TRUE | FALSE | 33.5  |
| P0C5Y9 | 14 | GGBGBTCSBTVB | FALSE | TRUE | FALSE | 29.1  |
| P0C5Y9 | 15 | GBGBTCSBTVBA | FALSE | TRUE | FALSE | 31.84 |
| P0C5Y9 | 16 | BGBTCSBTVBAE | FALSE | TRUE | FALSE | 23.39 |
| P0C5Y9 | 17 | GBTCSBTVBAEL | FALSE | TRUE | FALSE | 25.88 |
| P0C5Y9 | 18 | BTCSTVBAELS  | FALSE | TRUE | FALSE | 28.67 |
| P0C5Y9 | 19 | TCSBTVBAELSF | FALSE | TRUE | FALSE | 12.76 |
| P0C5Y9 | 20 | CSBTVBAELSF  | FALSE | TRUE | FALSE | 12.43 |
| P0C5Y9 | 30 | FSVSQVEBSLBE | FALSE | TRUE | FALSE | 10.69 |
| P0C5Y9 | 32 | VSQVEBSLBEGH | FALSE | TRUE | FALSE | 16.14 |
| P0C5Y9 | 33 | SQVEBSLBEGHY | FALSE | TRUE | FALSE | 24.81 |
| P0C5Y9 | 34 | QVEBSLBEGHYA | FALSE | TRUE | FALSE | 15.99 |
| P0C5Y9 | 35 | VEBSLBEGHYAQ | FALSE | TRUE | FALSE | 29.23 |
| P0C5Y9 | 36 | EBSLBEGHYAQB | FALSE | TRUE | FALSE | 66.51 |
| P0C5Y9 | 37 | BSLBEGHYAQBL | FALSE | TRUE | FALSE | 77.81 |
| P0C5Y9 | 38 | SLBEGHYAQBLS | FALSE | TRUE | FALSE | 84.66 |
| P0C5Y9 | 39 | LBEGHYAQBLSB | FALSE | TRUE | FALSE | 82.14 |
| P0C5Y9 | 40 | BEGHYAQBLSBT | FALSE | TRUE | FALSE | 71.95 |
| P0C5Y9 | 41 | EGHYAQBLSBTA | FALSE | TRUE | FALSE | 33.46 |
| P0C5Y9 | 42 | GHYAQBLSBTAP | FALSE | TRUE | FALSE | 20.61 |
| P0C5Y9 | 43 | HYAQBLSBTAPV | FALSE | TRUE | FALSE | 31.46 |
| P0C5Y9 | 44 | YAQBLSBTAPVY | FALSE | TRUE | FALSE | 48.98 |
| P0C5Y9 | 45 | AQBLSBTAPVYL | FALSE | TRUE | FALSE | 11.79 |
| P0C5Y9 | 46 | QBLSBTAPVYLA | FALSE | TRUE | FALSE | 16.83 |
| P0C5Z0 | 1  | MPBBBBBBGSSG | FALSE | TRUE | FALSE | 10.5  |
| P0C5Z0 | 2  | PBBBBBBGSSGA | FALSE | TRUE | FALSE | 15.24 |
| P0C5Z0 | 3  | BBBBBBGSSGAG | FALSE | TRUE | FALSE | 15.66 |
| P0C5Z0 | 4  | BBBBBGSSGAGG | FALSE | TRUE | FALSE | 13.55 |
| P0C5Z0 | 5  | BBBBGSSGAGGB | FALSE | TRUE | FALSE | 20.78 |
| P0C5Z0 | 6  | BBBGSSGAGGBG | FALSE | TRUE | FALSE | 14.77 |
| P0C5Z0 | 8  | BGSSGAGGBGBT | FALSE | TRUE | FALSE | 15.05 |
| P0C5Z0 | 9  | GSSGAGGBGBTC | FALSE | TRUE | FALSE | 20.84 |
| P0C5Z0 | 10 | SSGAGGBGBTCS | FALSE | TRUE | FALSE | 23.8  |
| P0C5Z0 | 11 | SGAGGBGBTCSB | FALSE | TRUE | FALSE | 25.21 |
| P0C5Z0 | 12 | GAGGBGBTCSBT | FALSE | TRUE | FALSE | 33.36 |
| P0C5Z0 | 13 | AGGBGBTCSBTV | FALSE | TRUE | FALSE | 33.5  |
| P0C5Z0 | 14 | GGBGBTCSBTVB | FALSE | TRUE | FALSE | 29.1  |

|        |     |              |       |      |       |       |
|--------|-----|--------------|-------|------|-------|-------|
| P0C5Z0 | 15  | GBGBTCSBTVBA | FALSE | TRUE | FALSE | 31.84 |
| P0C5Z0 | 16  | BGBTCSBTVBAE | FALSE | TRUE | FALSE | 23.39 |
| P0C5Z0 | 17  | GBTCSBTVBAEL | FALSE | TRUE | FALSE | 25.88 |
| P0C5Z0 | 18  | BTCBTVBAELS  | FALSE | TRUE | FALSE | 28.67 |
| P0C5Z0 | 19  | TCSBTVBAELSF | FALSE | TRUE | FALSE | 12.76 |
| P0C5Z0 | 20  | CSBTVBAELSF  | FALSE | TRUE | FALSE | 12.43 |
| P0C5Z0 | 30  | FSVSQVEBSLBE | FALSE | TRUE | FALSE | 10.69 |
| P0C5Z0 | 32  | VSQVEBSLBEGH | FALSE | TRUE | FALSE | 16.14 |
| P0C5Z0 | 33  | SQVEBSLBEGHY | FALSE | TRUE | FALSE | 24.81 |
| P0C5Z0 | 34  | QVEBSLBEGHYA | FALSE | TRUE | FALSE | 15.99 |
| P0C5Z0 | 35  | VEBSLBEGHYAQ | FALSE | TRUE | FALSE | 29.23 |
| P0C5Z0 | 36  | EBSLBEGHYAQB | FALSE | TRUE | FALSE | 66.51 |
| P0C5Z0 | 37  | BSLBEGHYAQBL | FALSE | TRUE | FALSE | 77.81 |
| P0C5Z0 | 38  | SLBEGHYAQBLS | FALSE | TRUE | FALSE | 84.66 |
| P0C5Z0 | 39  | LBEGHYAQBLSB | FALSE | TRUE | FALSE | 82.14 |
| P0C5Z0 | 40  | BEGHYAQBLSBT | FALSE | TRUE | FALSE | 71.95 |
| P0C5Z0 | 41  | EGHYAQBLSBTA | FALSE | TRUE | FALSE | 33.46 |
| P0C5Z0 | 42  | GHYAQBLSBTAP | FALSE | TRUE | FALSE | 20.61 |
| P0C5Z0 | 43  | HYAQBLSBTAPV | FALSE | TRUE | FALSE | 31.46 |
| P0C5Z0 | 44  | YAQBLSBTAPVY | FALSE | TRUE | FALSE | 48.98 |
| P0C5Z0 | 45  | AQBLSBTAPVYL | FALSE | TRUE | FALSE | 11.79 |
| P0C5Z0 | 46  | QBLSBTAPVYLA | FALSE | TRUE | FALSE | 16.83 |
| Q08AJ9 | 15  | AKTBSSBAGLQF | FALSE | TRUE | FALSE | 12.14 |
| Q08AJ9 | 16  | KTBSSBAGLQFP | FALSE | TRUE | FALSE | 22.31 |
| Q08AJ9 | 17  | TBSSBAGLQFPV | FALSE | TRUE | FALSE | 44.52 |
| Q08AJ9 | 18  | BSSBAGLQFPVG | FALSE | TRUE | FALSE | 36.47 |
| Q08AJ9 | 19  | SSBAGLQFPVGB | FALSE | TRUE | FALSE | 35.53 |
| Q08AJ9 | 20  | SBAGLQFPVGBV | FALSE | TRUE | FALSE | 34.17 |
| Q08AJ9 | 21  | BAGLQFPVGBVH | FALSE | TRUE | FALSE | 11.02 |
| Q08AJ9 | 31  | VHLLBKGNYS   | FALSE | TRUE | FALSE | 18.61 |
| Q08AJ9 | 32  | HBLLBKGNYSB  | FALSE | TRUE | FALSE | 52.06 |
| Q08AJ9 | 33  | BLLBKGNYSBV  | FALSE | TRUE | FALSE | 44.82 |
| Q08AJ9 | 34  | LLBKGNYSBVG  | FALSE | TRUE | FALSE | 40.91 |
| Q08AJ9 | 35  | LBKGNYSBVG   | FALSE | TRUE | FALSE | 25.67 |
| Q08AJ9 | 36  | BKGNYSBVGAG  | FALSE | TRUE | FALSE | 18.16 |
| Q08AJ9 | 37  | KGNYSBVGAGA  | FALSE | TRUE | FALSE | 11.37 |
| Q08AJ9 | 38  | GNYSBVGAGAP  | FALSE | TRUE | FALSE | 10.33 |
| Q08AJ9 | 39  | NYSEBVGAGAPV | FALSE | TRUE | FALSE | 17.1  |
| Q08AJ9 | 40  | YSEBVGAGAPVY | FALSE | TRUE | FALSE | 22.62 |
| Q08AJ9 | 79  | IIPBHLQLAIBN | FALSE | TRUE | FALSE | 11.95 |
| Q08AJ9 | 80  | IPBHLQLAIBND | FALSE | TRUE | FALSE | 24.36 |
| Q08AJ9 | 81  | PBHLQLAIBNDE | FALSE | TRUE | FALSE | 18.81 |
| Q08AJ9 | 82  | BHLQLAIBNDEE | FALSE | TRUE | FALSE | 10.35 |
| Q08AJ9 | 84  | LQLAIBNDEELN | FALSE | TRUE | FALSE | 12.7  |
| Q08AJ9 | 85  | QLAIBNDEELNK | FALSE | TRUE | FALSE | 12.24 |
| Q08AJ9 | 86  | LAIBNDEELNKL | FALSE | TRUE | FALSE | 10.95 |
| Q59FH0 | 65  | VLELBKKNOPLE | FALSE | TRUE | FALSE | 13.17 |
| Q59FH0 | 66  | LELBKKNOPLEV | FALSE | TRUE | FALSE | 12.02 |
| Q59FH0 | 128 | SIAFPSIGSGBN | FALSE | TRUE | FALSE | 11.39 |
| Q59FH0 | 129 | IAFPSIGSGBNG | FALSE | TRUE | FALSE | 15.1  |
| Q59FH0 | 130 | AFPSIGSGBNGF | FALSE | TRUE | FALSE | 21.91 |
| Q59FH0 | 131 | FPSIGSGBNGFP | FALSE | TRUE | FALSE | 30.24 |

|        |     |              |       |      |       |       |
|--------|-----|--------------|-------|------|-------|-------|
| Q5SQT3 | 10  | MSKLSBSABAGV | FALSE | TRUE | FALSE | 26.9  |
| Q5SQT3 | 11  | SKLSBSABAGVI | FALSE | TRUE | FALSE | 30.24 |
| Q5SQT3 | 13  | LSBSABAGVIFP | FALSE | TRUE | FALSE | 21.46 |
| Q5SQT3 | 14  | SBSABAGVIFPV | FALSE | TRUE | FALSE | 20.26 |
| Q5SQT3 | 15  | BSABAGVIFPVG | FALSE | TRUE | FALSE | 18.12 |
| Q5SQT3 | 16  | SABAGVIFPVGB | FALSE | TRUE | FALSE | 24.04 |
| Q92646 | 11  | KTHSSBAGLQFS | FALSE | TRUE | FALSE | 10.33 |
| Q92646 | 13  | HSSBAGLQFSVG | FALSE | TRUE | FALSE | 11.72 |
| Q92646 | 14  | SSBAGLQFSVGB | FALSE | TRUE | FALSE | 21.86 |
| Q92646 | 15  | SBAGLQFSVGBV | FALSE | TRUE | FALSE | 14.39 |
| Q92646 | 29  | LLBKGNyakBVB | FALSE | TRUE | FALSE | 10.59 |
| Q92646 | 34  | NYAKBVBAGAPV | FALSE | TRUE | FALSE | 21.61 |
| Q92646 | 35  | YAKBVBAGAPVY | FALSE | TRUE | FALSE | 17.31 |
| Q92646 | 37  | KBVBAGAPVYLE | FALSE | TRUE | FALSE | 17.7  |
| Q92646 | 38  | BVBAGAPVYLEA | FALSE | TRUE | FALSE | 13.46 |
| Q92646 | 66  | ABDKKTBVTPBB | FALSE | TRUE | FALSE | 12.48 |
| Q92646 | 67  | BDKKTbVTPBBL | FALSE | TRUE | FALSE | 12.21 |
| Q92646 | 70  | KTbVTPBBLQLA | FALSE | TRUE | FALSE | 11.26 |
| Q92646 | 71  | TbVTPBBLQLAI | FALSE | TRUE | FALSE | 10.67 |
| Q9HA11 | 10  | MSNLSBSABAGV | FALSE | TRUE | FALSE | 28.29 |
| Q9HA11 | 11  | SNLSBSABAGVI | FALSE | TRUE | FALSE | 38.75 |
| Q9HA11 | 12  | NLSBSABAGVIF | FALSE | TRUE | FALSE | 11.31 |
| Q9HA11 | 13  | LSBSABAGVIFP | FALSE | TRUE | FALSE | 21.46 |
| Q9HA11 | 14  | SBSABAGVIFPV | FALSE | TRUE | FALSE | 20.26 |
| Q9HA11 | 15  | BSABAGVIFPVG | FALSE | TRUE | FALSE | 18.12 |
| Q9HA11 | 16  | SABAGVIFPVGB | FALSE | TRUE | FALSE | 24.04 |
| Q9HA11 | 126 | TILSPPEKBGB  | FALSE | TRUE | FALSE | 20.76 |
| Q9HA11 | 129 | SPPPEKBGBKAT | FALSE | TRUE | FALSE | 14.56 |
| Q9BTM1 | 16  | KSBSSBAGLQFP | FALSE | TRUE | FALSE | 12.75 |
| Q9BTM1 | 17  | SBSSBAGLQFPV | FALSE | TRUE | FALSE | 41.02 |
| Q9BTM1 | 18  | BSSBAGLQFPVG | FALSE | TRUE | FALSE | 36.47 |
| Q9BTM1 | 19  | SSBAGLQFPVGB | FALSE | TRUE | FALSE | 35.53 |
| Q9BTM1 | 20  | SBAGLQFPVGBV | FALSE | TRUE | FALSE | 34.17 |
| Q9BTM1 | 21  | BAGLQFPVGBVH | FALSE | TRUE | FALSE | 11.02 |
| Q9BTM1 | 31  | VHLLBKGNyAE  | FALSE | TRUE | FALSE | 11.94 |
| Q9BTM1 | 32  | HBLLBKGNyAEB | FALSE | TRUE | FALSE | 40.27 |
| Q9BTM1 | 33  | BLLBKGNyAEBV | FALSE | TRUE | FALSE | 50.69 |
| Q9BTM1 | 34  | LLBKGNyAEBVG | FALSE | TRUE | FALSE | 36.2  |
| Q9BTM1 | 35  | LBKGNyAEBVGA | FALSE | TRUE | FALSE | 24.44 |
| Q9BTM1 | 36  | BKGNyAEBVGAG | FALSE | TRUE | FALSE | 17.49 |
| Q9BTM1 | 40  | YAEBVGAGAPVY | FALSE | TRUE | FALSE | 14.42 |
| Q9BTM1 | 79  | IIPBHLQLAIBN | FALSE | TRUE | FALSE | 11.95 |
| Q9BTM1 | 80  | IPBHLQLAIBND | FALSE | TRUE | FALSE | 24.36 |
| Q9BTM1 | 81  | PBHLQLAIBNDE | FALSE | TRUE | FALSE | 18.81 |
| Q9BTM1 | 82  | BHLQLAIBNDEE | FALSE | TRUE | FALSE | 10.35 |
| Q9BTM1 | 84  | LQLAIBNDEELN | FALSE | TRUE | FALSE | 12.7  |
| Q9BTM1 | 85  | QLAIBNDEELNK | FALSE | TRUE | FALSE | 12.24 |
| Q9BTM1 | 86  | LAIBNDEELNKL | FALSE | TRUE | FALSE | 10.95 |
| Q71UI9 | 17  | AVSBSQBAGLQF | FALSE | TRUE | FALSE | 25.01 |
| Q71UI9 | 18  | VSBSQBAGLQFP | FALSE | TRUE | FALSE | 36.79 |
| Q71UI9 | 19  | SBSQBAGLQFPV | FALSE | TRUE | FALSE | 35.2  |
| Q71UI9 | 20  | BSQBAGLQFPVG | FALSE | TRUE | FALSE | 31.55 |

|        |    |               |       |      |       |       |
|--------|----|---------------|-------|------|-------|-------|
| Q71UI9 | 21 | SQBAGLQFPVGB  | FALSE | TRUE | FALSE | 30.4  |
| Q71UI9 | 22 | QBAGLQFPVGBI  | FALSE | TRUE | FALSE | 36.46 |
| Q71UI9 | 29 | PVGBIHBHLKTB  | FALSE | TRUE | FALSE | 15.96 |
| Q71UI9 | 30 | VGBIHBHLKTB   | FALSE | TRUE | FALSE | 22.4  |
| Q71UI9 | 31 | GBIHBHLKTBTT  | FALSE | TRUE | FALSE | 22.54 |
| Q71UI9 | 32 | BIHBHLKTBTT   | FALSE | TRUE | FALSE | 23.78 |
| Q71UI9 | 33 | IHBHLKTBTTSH  | FALSE | TRUE | FALSE | 14.06 |
| Q71UI9 | 34 | HBHLKTBTTSHG  | FALSE | TRUE | FALSE | 20.35 |
| Q71UI9 | 35 | BHLKTBTTSHGB  | FALSE | TRUE | FALSE | 19.86 |
| Q71UI9 | 36 | HLKTBTTSHGBV  | FALSE | TRUE | FALSE | 17.69 |
| Q71UI9 | 37 | LKTBTTSHGBVG  | FALSE | TRUE | FALSE | 17.34 |
| Q71UI9 | 39 | TBTTSHGBVGAT  | FALSE | TRUE | FALSE | 15.2  |
| Q71UI9 | 40 | BTTSHGBVGATA  | FALSE | TRUE | FALSE | 16.32 |
| Q71UI9 | 79 | VKBITPBHLQLA  | FALSE | TRUE | FALSE | 11.5  |
| Q71UI9 | 81 | BITPBHLQLAIB  | FALSE | TRUE | FALSE | 13.26 |
| Q71UI9 | 82 | ITPBHLQLAIBG  | FALSE | TRUE | FALSE | 15.28 |
| Q71UI9 | 83 | TPBHLQLAIBGD  | FALSE | TRUE | FALSE | 28.24 |
| Q71UI9 | 84 | PBHLQLAIBGDE  | FALSE | TRUE | FALSE | 29.41 |
| Q71UI9 | 85 | BHLQLAIBGDEE  | FALSE | TRUE | FALSE | 19.3  |
| Q71UI9 | 86 | HLQLAIBGDEEL  | FALSE | TRUE | FALSE | 13.51 |
| Q71UI9 | 87 | LQLAIBGDEELD  | FALSE | TRUE | FALSE | 14.1  |
| Q71UI9 | 88 | QLAIBGDEELDS  | FALSE | TRUE | FALSE | 14.66 |
| Q71UI9 | 89 | LAIBGDEELDSL  | FALSE | TRUE | FALSE | 16.62 |
| Q71UI9 | 90 | AIBGDEELDSLI  | FALSE | TRUE | FALSE | 11.19 |
| Q71UI9 | 91 | IBGDEELDSLIIK | FALSE | TRUE | FALSE | 10.25 |
| P0C0S5 | 17 | AVSBSQBAGLQF  | FALSE | TRUE | FALSE | 25.01 |
| P0C0S5 | 18 | VSBSQBAGLQFP  | FALSE | TRUE | FALSE | 36.79 |
| P0C0S5 | 19 | SBSQBAGLQFPV  | FALSE | TRUE | FALSE | 35.2  |
| P0C0S5 | 20 | BSQBAGLQFPVG  | FALSE | TRUE | FALSE | 31.55 |
| P0C0S5 | 21 | SQBAGLQFPVGB  | FALSE | TRUE | FALSE | 30.4  |
| P0C0S5 | 22 | QBAGLQFPVGBI  | FALSE | TRUE | FALSE | 36.46 |
| P0C0S5 | 29 | PVGBIHBHLKSB  | FALSE | TRUE | FALSE | 13.27 |
| P0C0S5 | 30 | VGBIHBHLKSBT  | FALSE | TRUE | FALSE | 17.93 |
| P0C0S5 | 31 | GBIHBHLKSBTT  | FALSE | TRUE | FALSE | 16.69 |
| P0C0S5 | 32 | BIHBHLKSBTT   | FALSE | TRUE | FALSE | 17.27 |
| P0C0S5 | 33 | IHBHLKSBTTSH  | FALSE | TRUE | FALSE | 10.19 |
| P0C0S5 | 34 | HBHLKSBTTSHG  | FALSE | TRUE | FALSE | 13.86 |
| P0C0S5 | 35 | BHLKSBTTSHGB  | FALSE | TRUE | FALSE | 16.61 |
| P0C0S5 | 36 | HLKSBTTSHGBV  | FALSE | TRUE | FALSE | 10.13 |
| P0C0S5 | 39 | SBTTSHGBVGAT  | FALSE | TRUE | FALSE | 18.39 |
| P0C0S5 | 40 | BTTSHGBVGATA  | FALSE | TRUE | FALSE | 16.32 |
| P0C0S5 | 79 | VKBITPBHLQLA  | FALSE | TRUE | FALSE | 11.5  |
| P0C0S5 | 81 | BITPBHLQLAIB  | FALSE | TRUE | FALSE | 13.26 |
| P0C0S5 | 82 | ITPBHLQLAIBG  | FALSE | TRUE | FALSE | 15.28 |
| P0C0S5 | 83 | TPBHLQLAIBGD  | FALSE | TRUE | FALSE | 28.24 |
| P0C0S5 | 84 | PBHLQLAIBGDE  | FALSE | TRUE | FALSE | 29.41 |
| P0C0S5 | 85 | BHLQLAIBGDEE  | FALSE | TRUE | FALSE | 19.3  |
| P0C0S5 | 86 | HLQLAIBGDEEL  | FALSE | TRUE | FALSE | 13.51 |
| P0C0S5 | 87 | LQLAIBGDEELD  | FALSE | TRUE | FALSE | 14.1  |
| P0C0S5 | 88 | QLAIBGDEELDS  | FALSE | TRUE | FALSE | 14.66 |
| P0C0S5 | 89 | LAIBGDEELDSL  | FALSE | TRUE | FALSE | 16.62 |
| P0C0S5 | 90 | AIBGDEELDSLI  | FALSE | TRUE | FALSE | 11.19 |

|        |    |              |       |      |       |       |
|--------|----|--------------|-------|------|-------|-------|
| P0C0S5 | 91 | IBGDEELDSLK  | FALSE | TRUE | FALSE | 10.25 |
| P16104 | 16 | KSBSSBAGLQFP | FALSE | TRUE | FALSE | 12.75 |
| P16104 | 17 | SBSSBAGLQFPV | FALSE | TRUE | FALSE | 41.02 |
| P16104 | 18 | BSSBAGLQFPVG | FALSE | TRUE | FALSE | 36.47 |
| P16104 | 19 | SSBAGLQFPVGB | FALSE | TRUE | FALSE | 35.53 |
| P16104 | 20 | SBAGLQFPVGBV | FALSE | TRUE | FALSE | 34.17 |
| P16104 | 21 | BAGLQFPVGBVH | FALSE | TRUE | FALSE | 11.02 |
| P16104 | 32 | HLLBKGYAEB   | FALSE | TRUE | FALSE | 32.35 |
| P16104 | 33 | BLLBKGYAEBV  | FALSE | TRUE | FALSE | 41.13 |
| P16104 | 34 | LLBKGYAEBVG  | FALSE | TRUE | FALSE | 30.71 |
| P16104 | 35 | LBKGYAEBVGA  | FALSE | TRUE | FALSE | 25.82 |
| P16104 | 36 | BKGYAEBVGAG  | FALSE | TRUE | FALSE | 19.08 |
| P16104 | 37 | KGYAEBVGAGA  | FALSE | TRUE | FALSE | 11.1  |
| P16104 | 39 | HYAEBVGAGAPV | FALSE | TRUE | FALSE | 14.9  |
| P16104 | 40 | YAEBVGAGAPVY | FALSE | TRUE | FALSE | 14.42 |
| P16104 | 79 | IIPBHLQLAIBN | FALSE | TRUE | FALSE | 11.95 |
| P16104 | 80 | IPBHLQLAIBND | FALSE | TRUE | FALSE | 24.36 |
| P16104 | 81 | PBHLQLAIBNDE | FALSE | TRUE | FALSE | 18.81 |
| P16104 | 82 | BHLQLAIBNDEE | FALSE | TRUE | FALSE | 10.35 |
| P16104 | 84 | LQLAIBNDEELN | FALSE | TRUE | FALSE | 12.7  |
| P16104 | 85 | QLAIBNDEELNK | FALSE | TRUE | FALSE | 12.24 |
| P16104 | 86 | LAIBNDEELNKL | FALSE | TRUE | FALSE | 10.95 |
| Q96A08 | 31 | BKBTBKESYSIY | FALSE | TRUE | FALSE | 12.5  |
| Q96A08 | 69 | TDIFEBIASEAS | FALSE | TRUE | FALSE | 11.44 |
| Q96A08 | 70 | DIFEBIASEASB | FALSE | TRUE | FALSE | 14.78 |
| Q96A08 | 71 | IFEBIASEASBL | FALSE | TRUE | FALSE | 12.66 |
| Q96A08 | 72 | FEBIASEASBLA | FALSE | TRUE | FALSE | 14.29 |
| Q96A08 | 74 | BIASEASBLAHY | FALSE | TRUE | FALSE | 11.66 |
| Q96A08 | 77 | SEASBLAHYSKB | FALSE | TRUE | FALSE | 34.07 |
| Q96A08 | 78 | EASBLAHYSKBS | FALSE | TRUE | FALSE | 24.5  |
| Q96A08 | 79 | ASBLAHYSKBST | FALSE | TRUE | FALSE | 13.48 |
| Q96A08 | 80 | SBLAHYSKBSTI | FALSE | TRUE | FALSE | 17.95 |
| Q96A08 | 81 | BLAHYSKBSTIS | FALSE | TRUE | FALSE | 18.59 |
| Q96A08 | 82 | LAHYSKBSTISS | FALSE | TRUE | FALSE | 14.69 |
| Q96A08 | 83 | AHYSKBSTISSB | FALSE | TRUE | FALSE | 30.55 |
| Q96A08 | 84 | HYSKBSTISSBE | FALSE | TRUE | FALSE | 87.18 |
| Q96A08 | 85 | YSKBSTISSBEI | FALSE | TRUE | FALSE | 58.16 |
| Q96A08 | 86 | SKBSTISSBEIQ | FALSE | TRUE | FALSE | 48.36 |
| Q96A08 | 87 | KBSTISSBEIQT | FALSE | TRUE | FALSE | 46.24 |
| Q96A08 | 88 | BSTISSBEIQTA | FALSE | TRUE | FALSE | 29.79 |
| Q96A08 | 89 | STISSBEIQTAV | FALSE | TRUE | FALSE | 26.77 |
| Q96A08 | 90 | TISSBEIQTAVB | FALSE | TRUE | FALSE | 26.25 |
| Q96A08 | 91 | ISSBEIQTAVBL | FALSE | TRUE | FALSE | 20.09 |
| Q96A08 | 92 | SSBEIQTAVBLL | FALSE | TRUE | FALSE | 10.66 |
| P33778 | 30 | BKBSBKESYSIY | FALSE | TRUE | FALSE | 11.41 |
| P33778 | 69 | DIFEBIAGEASB | FALSE | TRUE | FALSE | 11.74 |
| P33778 | 70 | IFEBIAGEASBL | FALSE | TRUE | FALSE | 14.04 |
| P33778 | 71 | FEBIAGEASBLA | FALSE | TRUE | FALSE | 12.3  |
| P33778 | 73 | BIAGEASBLAHY | FALSE | TRUE | FALSE | 12.32 |
| P33778 | 76 | GEASBLAHYNKB | FALSE | TRUE | FALSE | 27.97 |
| P33778 | 77 | EASBLAHYNKBS | FALSE | TRUE | FALSE | 18.81 |
| P33778 | 78 | ASBLAHYNKBST | FALSE | TRUE | FALSE | 10.93 |

|        |    |              |       |      |       |       |
|--------|----|--------------|-------|------|-------|-------|
| P33778 | 79 | SBLAHYNKBSTI | FALSE | TRUE | FALSE | 13.71 |
| P33778 | 80 | BLAHYNKBSTIT | FALSE | TRUE | FALSE | 13.18 |
| P33778 | 81 | LAHYNKBSTITS | FALSE | TRUE | FALSE | 12.76 |
| P33778 | 82 | AHYNKBSTITSB | FALSE | TRUE | FALSE | 26.57 |
| P33778 | 83 | HYNKBSTITSBE | FALSE | TRUE | FALSE | 59.47 |
| P33778 | 84 | YNKBSTITSBEI | FALSE | TRUE | FALSE | 50.75 |
| P33778 | 85 | NKBSTITSBEIQ | FALSE | TRUE | FALSE | 38.71 |
| P33778 | 86 | KBSTITSBEIQT | FALSE | TRUE | FALSE | 35.85 |
| P33778 | 87 | BSTITSBEIQTA | FALSE | TRUE | FALSE | 26.45 |
| P33778 | 88 | STITSBEIQTAV | FALSE | TRUE | FALSE | 22.47 |
| P33778 | 89 | TITSBEIQTAVB | FALSE | TRUE | FALSE | 36.38 |
| P33778 | 90 | ITSBEIQTAVBL | FALSE | TRUE | FALSE | 27.17 |
| P33778 | 91 | TSBEIQTAVBLL | FALSE | TRUE | FALSE | 11.1  |
| P62807 | 30 | BKBSBKESYSVY | FALSE | TRUE | FALSE | 10.63 |
| P62807 | 69 | DIFEBIAGEASB | FALSE | TRUE | FALSE | 11.74 |
| P62807 | 70 | IFEBIAGEASBL | FALSE | TRUE | FALSE | 14.04 |
| P62807 | 71 | FEBIAGEASBLA | FALSE | TRUE | FALSE | 12.3  |
| P62807 | 73 | BIAGEASBLAHY | FALSE | TRUE | FALSE | 12.32 |
| P62807 | 76 | GEASBLAHYNKB | FALSE | TRUE | FALSE | 27.97 |
| P62807 | 77 | EASBLAHYNKBS | FALSE | TRUE | FALSE | 18.81 |
| P62807 | 78 | ASBLAHYNKBST | FALSE | TRUE | FALSE | 10.93 |
| P62807 | 79 | SBLAHYNKBSTI | FALSE | TRUE | FALSE | 13.71 |
| P62807 | 80 | BLAHYNKBSTIT | FALSE | TRUE | FALSE | 13.18 |
| P62807 | 81 | LAHYNKBSTITS | FALSE | TRUE | FALSE | 12.76 |
| P62807 | 82 | AHYNKBSTITSB | FALSE | TRUE | FALSE | 26.57 |
| P62807 | 83 | HYNKBSTITSBE | FALSE | TRUE | FALSE | 59.47 |
| P62807 | 84 | YNKBSTITSBEI | FALSE | TRUE | FALSE | 50.75 |
| P62807 | 85 | NKBSTITSBEIQ | FALSE | TRUE | FALSE | 38.71 |
| P62807 | 86 | KBSTITSBEIQT | FALSE | TRUE | FALSE | 35.85 |
| P62807 | 87 | BSTITSBEIQTA | FALSE | TRUE | FALSE | 26.45 |
| P62807 | 88 | STITSBEIQTAV | FALSE | TRUE | FALSE | 22.47 |
| P62807 | 89 | TITSBEIQTAVB | FALSE | TRUE | FALSE | 36.38 |
| P62807 | 90 | ITSBEIQTAVBL | FALSE | TRUE | FALSE | 27.17 |
| P62807 | 91 | TSBEIQTAVBLL | FALSE | TRUE | FALSE | 11.1  |
| P58876 | 30 | BKBSBKESYSVY | FALSE | TRUE | FALSE | 10.63 |
| P58876 | 69 | DIFEBIAGEASB | FALSE | TRUE | FALSE | 11.74 |
| P58876 | 70 | IFEBIAGEASBL | FALSE | TRUE | FALSE | 14.04 |
| P58876 | 71 | FEBIAGEASBLA | FALSE | TRUE | FALSE | 12.3  |
| P58876 | 73 | BIAGEASBLAHY | FALSE | TRUE | FALSE | 12.32 |
| P58876 | 76 | GEASBLAHYNKB | FALSE | TRUE | FALSE | 27.97 |
| P58876 | 77 | EASBLAHYNKBS | FALSE | TRUE | FALSE | 18.81 |
| P58876 | 78 | ASBLAHYNKBST | FALSE | TRUE | FALSE | 10.93 |
| P58876 | 79 | SBLAHYNKBSTI | FALSE | TRUE | FALSE | 13.71 |
| P58876 | 80 | BLAHYNKBSTIT | FALSE | TRUE | FALSE | 13.18 |
| P58876 | 81 | LAHYNKBSTITS | FALSE | TRUE | FALSE | 12.76 |
| P58876 | 82 | AHYNKBSTITSB | FALSE | TRUE | FALSE | 26.57 |
| P58876 | 83 | HYNKBSTITSBE | FALSE | TRUE | FALSE | 59.47 |
| P58876 | 84 | YNKBSTITSBEI | FALSE | TRUE | FALSE | 50.75 |
| P58876 | 85 | NKBSTITSBEIQ | FALSE | TRUE | FALSE | 38.71 |
| P58876 | 86 | KBSTITSBEIQT | FALSE | TRUE | FALSE | 35.85 |
| P58876 | 87 | BSTITSBEIQTA | FALSE | TRUE | FALSE | 26.45 |
| P58876 | 88 | STITSBEIQTAV | FALSE | TRUE | FALSE | 22.47 |

|        |    |              |       |      |       |       |
|--------|----|--------------|-------|------|-------|-------|
| P58876 | 89 | TITSBEIQTAVB | FALSE | TRUE | FALSE | 36.38 |
| P58876 | 90 | ITSBEIQTAVBL | FALSE | TRUE | FALSE | 27.17 |
| P58876 | 91 | TSBEIQTAVBLL | FALSE | TRUE | FALSE | 11.1  |
| Q93079 | 30 | BKBSBKESYSVY | FALSE | TRUE | FALSE | 10.63 |
| Q93079 | 69 | DIFEBIAGEASB | FALSE | TRUE | FALSE | 11.74 |
| Q93079 | 70 | IFEBIAGEASBL | FALSE | TRUE | FALSE | 14.04 |
| Q93079 | 71 | FEBIAGEASBLA | FALSE | TRUE | FALSE | 12.3  |
| Q93079 | 73 | BIAGEASBLAHY | FALSE | TRUE | FALSE | 12.32 |
| Q93079 | 76 | GEASBLAHYNKB | FALSE | TRUE | FALSE | 27.97 |
| Q93079 | 77 | EASBLAHYNKBS | FALSE | TRUE | FALSE | 18.81 |
| Q93079 | 78 | ASBLAHYNKBST | FALSE | TRUE | FALSE | 10.93 |
| Q93079 | 79 | SBLAHYNKBSTI | FALSE | TRUE | FALSE | 13.71 |
| Q93079 | 80 | BLAHYNKBSTIT | FALSE | TRUE | FALSE | 13.18 |
| Q93079 | 81 | LAHYNKBSTITS | FALSE | TRUE | FALSE | 12.76 |
| Q93079 | 82 | AHYNKBSTITSB | FALSE | TRUE | FALSE | 26.57 |
| Q93079 | 83 | HYNKBSTITSBE | FALSE | TRUE | FALSE | 59.47 |
| Q93079 | 84 | YNKBSTITSBEI | FALSE | TRUE | FALSE | 50.75 |
| Q93079 | 85 | NKBSTITSBEIQ | FALSE | TRUE | FALSE | 38.71 |
| Q93079 | 86 | KBSTITSBEIQT | FALSE | TRUE | FALSE | 35.85 |
| Q93079 | 87 | BSTITSBEIQTA | FALSE | TRUE | FALSE | 26.45 |
| Q93079 | 88 | STITSBEIQTAV | FALSE | TRUE | FALSE | 22.47 |
| Q93079 | 89 | TITSBEIQTAVB | FALSE | TRUE | FALSE | 36.38 |
| Q93079 | 90 | ITSBEIQTAVBL | FALSE | TRUE | FALSE | 27.17 |
| Q93079 | 91 | TSBEIQTAVBLL | FALSE | TRUE | FALSE | 11.1  |
| P06899 | 30 | BKBSBKESYSIY | FALSE | TRUE | FALSE | 11.41 |
| P06899 | 69 | DIFEBIAGEASB | FALSE | TRUE | FALSE | 11.74 |
| P06899 | 70 | IFEBIAGEASBL | FALSE | TRUE | FALSE | 14.04 |
| P06899 | 71 | FEBIAGEASBLA | FALSE | TRUE | FALSE | 12.3  |
| P06899 | 73 | BIAGEASBLAHY | FALSE | TRUE | FALSE | 12.32 |
| P06899 | 76 | GEASBLAHYNKB | FALSE | TRUE | FALSE | 27.97 |
| P06899 | 77 | EASBLAHYNKBS | FALSE | TRUE | FALSE | 18.81 |
| P06899 | 78 | ASBLAHYNKBST | FALSE | TRUE | FALSE | 10.93 |
| P06899 | 79 | SBLAHYNKBSTI | FALSE | TRUE | FALSE | 13.71 |
| P06899 | 80 | BLAHYNKBSTIT | FALSE | TRUE | FALSE | 13.18 |
| P06899 | 81 | LAHYNKBSTITS | FALSE | TRUE | FALSE | 12.76 |
| P06899 | 82 | AHYNKBSTITSB | FALSE | TRUE | FALSE | 26.57 |
| P06899 | 83 | HYNKBSTITSBE | FALSE | TRUE | FALSE | 59.47 |
| P06899 | 84 | YNKBSTITSBEI | FALSE | TRUE | FALSE | 50.75 |
| P06899 | 85 | NKBSTITSBEIQ | FALSE | TRUE | FALSE | 38.71 |
| P06899 | 86 | KBSTITSBEIQT | FALSE | TRUE | FALSE | 35.85 |
| P06899 | 87 | BSTITSBEIQTA | FALSE | TRUE | FALSE | 26.45 |
| P06899 | 88 | STITSBEIQTAV | FALSE | TRUE | FALSE | 22.47 |
| P06899 | 89 | TITSBEIQTAVB | FALSE | TRUE | FALSE | 36.38 |
| P06899 | 90 | ITSBEIQTAVBL | FALSE | TRUE | FALSE | 27.17 |
| P06899 | 91 | TSBEIQTAVBLL | FALSE | TRUE | FALSE | 11.1  |
| O60814 | 30 | BKBSBKESYSVY | FALSE | TRUE | FALSE | 10.63 |
| O60814 | 69 | DIFEBIAGEASB | FALSE | TRUE | FALSE | 11.74 |
| O60814 | 70 | IFEBIAGEASBL | FALSE | TRUE | FALSE | 14.04 |
| O60814 | 71 | FEBIAGEASBLA | FALSE | TRUE | FALSE | 12.3  |
| O60814 | 73 | BIAGEASBLAHY | FALSE | TRUE | FALSE | 12.32 |
| O60814 | 76 | GEASBLAHYNKB | FALSE | TRUE | FALSE | 27.97 |
| O60814 | 77 | EASBLAHYNKBS | FALSE | TRUE | FALSE | 18.81 |



|        |    |              |       |      |       |       |
|--------|----|--------------|-------|------|-------|-------|
| O60814 | 78 | ASBLAHYNKBST | FALSE | TRUE | FALSE | 10.93 |
| O60814 | 79 | SBLAHYNKBSTI | FALSE | TRUE | FALSE | 13.71 |
| O60814 | 80 | BLAHYNKBSTIT | FALSE | TRUE | FALSE | 13.18 |
| O60814 | 81 | LAHYNKBSTITS | FALSE | TRUE | FALSE | 12.76 |
| O60814 | 82 | AHYNKBSTITSB | FALSE | TRUE | FALSE | 26.57 |
| O60814 | 83 | HYNKBSTITSBE | FALSE | TRUE | FALSE | 59.47 |
| O60814 | 84 | YNKBSTITSBEI | FALSE | TRUE | FALSE | 50.75 |
| O60814 | 85 | NKBSTITSBEIQ | FALSE | TRUE | FALSE | 38.71 |
| O60814 | 86 | KBSTITSBEIQT | FALSE | TRUE | FALSE | 35.85 |
| O60814 | 87 | BSTITSBEIQTA | FALSE | TRUE | FALSE | 26.45 |
| O60814 | 88 | STITSBEIQTAV | FALSE | TRUE | FALSE | 22.47 |
| O60814 | 89 | TITSBEIQTAVB | FALSE | TRUE | FALSE | 36.38 |
| O60814 | 90 | ITSBEIQTAVBL | FALSE | TRUE | FALSE | 27.17 |
| O60814 | 91 | TSBEIQTAVBLL | FALSE | TRUE | FALSE | 11.1  |
| Q99880 | 30 | BKBSBKESYSVY | FALSE | TRUE | FALSE | 10.63 |
| Q99880 | 68 | NDIFEBIASEAS | FALSE | TRUE | FALSE | 11.16 |
| Q99880 | 69 | DIFEBIASEASB | FALSE | TRUE | FALSE | 14.78 |
| Q99880 | 70 | IFEBIASEASBL | FALSE | TRUE | FALSE | 12.66 |
| Q99880 | 71 | FEBIASEASBLA | FALSE | TRUE | FALSE | 14.29 |
| Q99880 | 73 | BIASEASBLAHY | FALSE | TRUE | FALSE | 11.66 |
| Q99880 | 76 | SEASBLAHYNKB | FALSE | TRUE | FALSE | 26.15 |
| Q99880 | 77 | EASBLAHYNKBS | FALSE | TRUE | FALSE | 18.81 |
| Q99880 | 78 | ASBLAHYNKBST | FALSE | TRUE | FALSE | 10.93 |
| Q99880 | 79 | SBLAHYNKBSTI | FALSE | TRUE | FALSE | 13.71 |
| Q99880 | 80 | BLAHYNKBSTIT | FALSE | TRUE | FALSE | 13.18 |
| Q99880 | 81 | LAHYNKBSTITS | FALSE | TRUE | FALSE | 12.76 |
| Q99880 | 82 | AHYNKBSTITSB | FALSE | TRUE | FALSE | 26.57 |
| Q99880 | 83 | HYNKBSTITSBE | FALSE | TRUE | FALSE | 59.47 |
| Q99880 | 84 | YNKBSTITSBEI | FALSE | TRUE | FALSE | 50.75 |
| Q99880 | 85 | NKBSTITSBEIQ | FALSE | TRUE | FALSE | 38.71 |
| Q99880 | 86 | KBSTITSBEIQT | FALSE | TRUE | FALSE | 35.85 |
| Q99880 | 87 | BSTITSBEIQTA | FALSE | TRUE | FALSE | 26.45 |
| Q99880 | 88 | STITSBEIQTAV | FALSE | TRUE | FALSE | 22.47 |
| Q99880 | 89 | TITSBEIQTAVB | FALSE | TRUE | FALSE | 36.38 |
| Q99880 | 90 | ITSBEIQTAVBL | FALSE | TRUE | FALSE | 27.17 |
| Q99880 | 91 | TSBEIQTAVBLL | FALSE | TRUE | FALSE | 11.1  |
| Q99879 | 30 | BKBSBKESYSVY | FALSE | TRUE | FALSE | 10.63 |
| Q99879 | 69 | DIFEBIAGEASB | FALSE | TRUE | FALSE | 11.74 |
| Q99879 | 70 | IFEBIAGEASBL | FALSE | TRUE | FALSE | 14.04 |
| Q99879 | 71 | FEBIAGEASBLA | FALSE | TRUE | FALSE | 12.3  |
| Q99879 | 73 | BIAGEASBLAHY | FALSE | TRUE | FALSE | 12.32 |
| Q99879 | 76 | GEASBLAHYNKB | FALSE | TRUE | FALSE | 27.97 |
| Q99879 | 77 | EASBLAHYNKBS | FALSE | TRUE | FALSE | 18.81 |
| Q99879 | 78 | ASBLAHYNKBST | FALSE | TRUE | FALSE | 10.93 |
| Q99879 | 79 | SBLAHYNKBSTI | FALSE | TRUE | FALSE | 13.71 |
| Q99879 | 80 | BLAHYNKBSTIT | FALSE | TRUE | FALSE | 13.18 |
| Q99879 | 81 | LAHYNKBSTITS | FALSE | TRUE | FALSE | 12.76 |
| Q99879 | 82 | AHYNKBSTITSB | FALSE | TRUE | FALSE | 26.57 |
| Q99879 | 83 | HYNKBSTITSBE | FALSE | TRUE | FALSE | 59.47 |
| Q99879 | 84 | YNKBSTITSBEI | FALSE | TRUE | FALSE | 50.75 |
| Q99879 | 85 | NKBSTITSBEIQ | FALSE | TRUE | FALSE | 38.71 |
| Q99879 | 86 | KBSTITSBEIQT | FALSE | TRUE | FALSE | 35.85 |

|        |    |              |       |      |       |       |
|--------|----|--------------|-------|------|-------|-------|
| Q99879 | 87 | BSTITSBEIQTA | FALSE | TRUE | FALSE | 26.45 |
| Q99879 | 88 | STITSBEIQTAV | FALSE | TRUE | FALSE | 22.47 |
| Q99879 | 89 | TITSBEIQTAVB | FALSE | TRUE | FALSE | 36.38 |
| Q99879 | 90 | ITSBEIQTAVBL | FALSE | TRUE | FALSE | 27.17 |
| Q99879 | 91 | TSBEIQTAVBLL | FALSE | TRUE | FALSE | 11.1  |
| Q99877 | 30 | BKBSBKESYSVY | FALSE | TRUE | FALSE | 10.63 |
| Q99877 | 69 | DIFEBIAGEASB | FALSE | TRUE | FALSE | 11.74 |
| Q99877 | 70 | IFEBIAGEASBL | FALSE | TRUE | FALSE | 14.04 |
| Q99877 | 71 | FEBIAGEASBLA | FALSE | TRUE | FALSE | 12.3  |
| Q99877 | 73 | BIAGEASBLAHY | FALSE | TRUE | FALSE | 12.32 |
| Q99877 | 76 | GEASBLAHYNKB | FALSE | TRUE | FALSE | 27.97 |
| Q99877 | 77 | EASBLAHYNKBS | FALSE | TRUE | FALSE | 18.81 |
| Q99877 | 78 | ASBLAHYNKBST | FALSE | TRUE | FALSE | 10.93 |
| Q99877 | 79 | SBLAHYNKBSTI | FALSE | TRUE | FALSE | 13.71 |
| Q99877 | 80 | BLAHYNKBSTIT | FALSE | TRUE | FALSE | 13.18 |
| Q99877 | 81 | LAHYNKBSTITS | FALSE | TRUE | FALSE | 12.76 |
| Q99877 | 82 | AHYNKBSTITSB | FALSE | TRUE | FALSE | 26.57 |
| Q99877 | 83 | HYNKBSTITSBE | FALSE | TRUE | FALSE | 59.47 |
| Q99877 | 84 | YNKBSTITSBEI | FALSE | TRUE | FALSE | 50.75 |
| Q99877 | 85 | NKBSTITSBEIQ | FALSE | TRUE | FALSE | 38.71 |
| Q99877 | 86 | KBSTITSBEIQT | FALSE | TRUE | FALSE | 35.85 |
| Q99877 | 87 | BSTITSBEIQTA | FALSE | TRUE | FALSE | 26.45 |
| Q99877 | 88 | STITSBEIQTAV | FALSE | TRUE | FALSE | 22.47 |
| Q99877 | 89 | TITSBEIQTAVB | FALSE | TRUE | FALSE | 36.38 |
| Q99877 | 90 | ITSBEIQTAVBL | FALSE | TRUE | FALSE | 27.17 |
| Q99877 | 91 | TSBEIQTAVBLL | FALSE | TRUE | FALSE | 11.1  |
| P23527 | 30 | BKBSBKESYSIY | FALSE | TRUE | FALSE | 11.41 |
| P23527 | 69 | DIFEBIAGEASB | FALSE | TRUE | FALSE | 11.74 |
| P23527 | 70 | IFEBIAGEASBL | FALSE | TRUE | FALSE | 14.04 |
| P23527 | 71 | FEBIAGEASBLA | FALSE | TRUE | FALSE | 12.3  |
| P23527 | 73 | BIAGEASBLAHY | FALSE | TRUE | FALSE | 12.32 |
| P23527 | 76 | GEASBLAHYNKB | FALSE | TRUE | FALSE | 27.97 |
| P23527 | 77 | EASBLAHYNKBS | FALSE | TRUE | FALSE | 18.81 |
| P23527 | 78 | ASBLAHYNKBST | FALSE | TRUE | FALSE | 10.93 |
| P23527 | 79 | SBLAHYNKBSTI | FALSE | TRUE | FALSE | 13.71 |
| P23527 | 80 | BLAHYNKBSTIT | FALSE | TRUE | FALSE | 13.18 |
| P23527 | 81 | LAHYNKBSTITS | FALSE | TRUE | FALSE | 12.76 |
| P23527 | 82 | AHYNKBSTITSB | FALSE | TRUE | FALSE | 26.57 |
| P23527 | 83 | HYNKBSTITSBE | FALSE | TRUE | FALSE | 59.47 |
| P23527 | 84 | YNKBSTITSBEI | FALSE | TRUE | FALSE | 50.75 |
| P23527 | 85 | NKBSTITSBEIQ | FALSE | TRUE | FALSE | 38.71 |
| P23527 | 86 | KBSTITSBEIQT | FALSE | TRUE | FALSE | 35.85 |
| P23527 | 87 | BSTITSBEIQTA | FALSE | TRUE | FALSE | 26.45 |
| P23527 | 88 | STITSBEIQTAV | FALSE | TRUE | FALSE | 22.47 |
| P23527 | 89 | TITSBEIQTAVB | FALSE | TRUE | FALSE | 36.38 |
| P23527 | 90 | ITSBEIQTAVBL | FALSE | TRUE | FALSE | 27.17 |
| P23527 | 91 | TSBEIQTAVBLL | FALSE | TRUE | FALSE | 11.1  |
| Q16778 | 30 | BKBSBKESYSIY | FALSE | TRUE | FALSE | 12.84 |
| Q16778 | 69 | DIFEBIAGEASB | FALSE | TRUE | FALSE | 12.17 |
| Q16778 | 69 | DIFEBIAGEASB | FALSE | TRUE | FALSE | 13.51 |
| Q16778 | 70 | IFEBIAGEASBL | FALSE | TRUE | FALSE | 14.96 |
| Q16778 | 70 | IFEBIAGEASBL | FALSE | TRUE | FALSE | 14.42 |

|        |    |               |       |      |       |       |
|--------|----|---------------|-------|------|-------|-------|
| Q16778 | 71 | FEBIAGEASBLA  | FALSE | TRUE | FALSE | 12.89 |
| Q16778 | 71 | FEBIAGEASBLA  | FALSE | TRUE | FALSE | 12.21 |
| Q16778 | 73 | BIAGEASBLAHY  | FALSE | TRUE | FALSE | 11.58 |
| Q16778 | 73 | BIAGEASBLAHY  | FALSE | TRUE | FALSE | 12.15 |
| Q16778 | 76 | GEASBLAHYNKB  | FALSE | TRUE | FALSE | 27.58 |
| Q16778 | 76 | GEASBLAHYNKB  | FALSE | TRUE | FALSE | 24.66 |
| Q16778 | 77 | EASBLAHYNKBS  | FALSE | TRUE | FALSE | 19.43 |
| Q16778 | 77 | EASBLAHYNKBS  | FALSE | TRUE | FALSE | 18.09 |
| Q16778 | 78 | ASBLAHYNKBST  | FALSE | TRUE | FALSE | 10.6  |
| Q16778 | 78 | ASBLAHYNKBST  | FALSE | TRUE | FALSE | 12.35 |
| Q16778 | 79 | SBLAHYNKBSTI  | FALSE | TRUE | FALSE | 13.27 |
| Q16778 | 79 | SBLAHYNKBSTI  | FALSE | TRUE | FALSE | 15.65 |
| Q16778 | 80 | BLAHYNKBSTIT  | FALSE | TRUE | FALSE | 12.71 |
| Q16778 | 80 | BLAHYNKBSTIT  | FALSE | TRUE | FALSE | 13.57 |
| Q16778 | 81 | LAHYNKBSTITS  | FALSE | TRUE | FALSE | 10.64 |
| Q16778 | 81 | LAHYNKBSTITS  | FALSE | TRUE | FALSE | 11.4  |
| Q16778 | 82 | AHYNKBSTITSB  | FALSE | TRUE | FALSE | 27.3  |
| Q16778 | 82 | AHYNKBSTITSB  | FALSE | TRUE | FALSE | 26.2  |
| Q16778 | 83 | HYNKBSTITSBE  | FALSE | TRUE | FALSE | 48.59 |
| Q16778 | 83 | HYNKBSTITSBE  | FALSE | TRUE | FALSE | 52    |
| Q16778 | 84 | YNKBSTITSBEI  | FALSE | TRUE | FALSE | 53.61 |
| Q16778 | 84 | YNKBSTITSBEI  | FALSE | TRUE | FALSE | 54.89 |
| Q16778 | 85 | NKBSTITSBEIQ  | FALSE | TRUE | FALSE | 41.45 |
| Q16778 | 85 | NKBSTITSBEIQ  | FALSE | TRUE | FALSE | 43.91 |
| Q16778 | 86 | KBSTITSBEIQT  | FALSE | TRUE | FALSE | 47.85 |
| Q16778 | 86 | KBSTITSBEIQT  | FALSE | TRUE | FALSE | 41.52 |
| Q16778 | 87 | BSTITSB EIQTA | FALSE | TRUE | FALSE | 34.16 |
| Q16778 | 87 | BSTITSB EIQTA | FALSE | TRUE | FALSE | 32.9  |
| Q16778 | 88 | STITSB EIQTAV | FALSE | TRUE | FALSE | 26.72 |
| Q16778 | 88 | STITSB EIQTAV | FALSE | TRUE | FALSE | 26.28 |
| Q16778 | 89 | TITSB EIQTAVB | FALSE | TRUE | FALSE | 30.84 |
| Q16778 | 89 | TITSB EIQTAVB | FALSE | TRUE | FALSE | 34.65 |
| Q16778 | 90 | ITSB EIQTAVBL | FALSE | TRUE | FALSE | 22.56 |
| Q16778 | 90 | ITSB EIQTAVBL | FALSE | TRUE | FALSE | 24.27 |
| Q5QNW6 | 30 | BKBSBKESYSVY  | FALSE | TRUE | FALSE | 10.63 |
| Q5QNW6 | 69 | DIFEBIAGEASB  | FALSE | TRUE | FALSE | 11.74 |
| Q5QNW6 | 70 | IFEBIAGEASBL  | FALSE | TRUE | FALSE | 14.04 |
| Q5QNW6 | 71 | FEBIAGEASBLA  | FALSE | TRUE | FALSE | 12.3  |
| Q5QNW6 | 73 | BIAGEASBLAHY  | FALSE | TRUE | FALSE | 12.32 |
| Q5QNW6 | 76 | GEASBLAHYNKB  | FALSE | TRUE | FALSE | 27.97 |
| Q5QNW6 | 77 | EASBLAHYNKBS  | FALSE | TRUE | FALSE | 18.81 |
| Q5QNW6 | 78 | ASBLAHYNKBST  | FALSE | TRUE | FALSE | 10.93 |
| Q5QNW6 | 79 | SBLAHYNKBSTI  | FALSE | TRUE | FALSE | 13.71 |
| Q5QNW6 | 80 | BLAHYNKBSTIT  | FALSE | TRUE | FALSE | 13.18 |
| Q5QNW6 | 81 | LAHYNKBSTITS  | FALSE | TRUE | FALSE | 12.76 |
| Q5QNW6 | 82 | AHYNKBSTITSB  | FALSE | TRUE | FALSE | 26.57 |
| Q5QNW6 | 83 | HYNKBSTITSBE  | FALSE | TRUE | FALSE | 59.47 |
| Q5QNW6 | 84 | YNKBSTITSBEI  | FALSE | TRUE | FALSE | 50.75 |
| Q5QNW6 | 85 | NKBSTITSBEIQ  | FALSE | TRUE | FALSE | 38.71 |
| Q5QNW6 | 86 | KBSTITSBEIQT  | FALSE | TRUE | FALSE | 35.85 |
| Q5QNW6 | 87 | BSTITSB EIQTA | FALSE | TRUE | FALSE | 26.45 |
| Q5QNW6 | 88 | STITSB EIQTAV | FALSE | TRUE | FALSE | 22.47 |

|        |     |              |       |      |       |       |
|--------|-----|--------------|-------|------|-------|-------|
| Q5QNW6 | 89  | TITSBEIQTAVB | FALSE | TRUE | FALSE | 36.38 |
| Q5QNW6 | 90  | ITSBEIQTAVBL | FALSE | TRUE | FALSE | 27.17 |
| Q5QNW6 | 91  | TSBEIQTAVBLL | FALSE | TRUE | FALSE | 11.1  |
| Q8N257 | 30  | BKBGBKESYSIY | FALSE | TRUE | FALSE | 22.88 |
| Q8N257 | 31  | KBGBKESYSIYV | FALSE | TRUE | FALSE | 12.2  |
| Q8N257 | 68  | NDIFEBIASEAS | FALSE | TRUE | FALSE | 11.16 |
| Q8N257 | 69  | DIFEBIASEASB | FALSE | TRUE | FALSE | 14.78 |
| Q8N257 | 70  | IFEBIASEASBL | FALSE | TRUE | FALSE | 12.66 |
| Q8N257 | 71  | FEBIASEASBLA | FALSE | TRUE | FALSE | 14.29 |
| Q8N257 | 73  | BIASEASBLAHY | FALSE | TRUE | FALSE | 11.66 |
| Q8N257 | 76  | SEASBLAHYNKB | FALSE | TRUE | FALSE | 26.15 |
| Q8N257 | 77  | EASBLAHYNKBS | FALSE | TRUE | FALSE | 18.81 |
| Q8N257 | 78  | ASBLAHYNKBST | FALSE | TRUE | FALSE | 10.93 |
| Q8N257 | 79  | SBLAHYNKBSTI | FALSE | TRUE | FALSE | 13.71 |
| Q8N257 | 80  | BLAHYNKBSTIT | FALSE | TRUE | FALSE | 13.18 |
| Q8N257 | 81  | LAHYNKBSTITS | FALSE | TRUE | FALSE | 12.76 |
| Q8N257 | 82  | AHYNKBSTITSB | FALSE | TRUE | FALSE | 26.57 |
| Q8N257 | 83  | HYNKBSTITSBE | FALSE | TRUE | FALSE | 59.47 |
| Q8N257 | 84  | YNKBSTITSBEV | FALSE | TRUE | FALSE | 52.41 |
| Q8N257 | 85  | NKBSTITSBEVQ | FALSE | TRUE | FALSE | 44.6  |
| Q8N257 | 86  | KBSTITSBEVQT | FALSE | TRUE | FALSE | 34.24 |
| Q8N257 | 87  | BSTITSBEVQTA | FALSE | TRUE | FALSE | 27.36 |
| Q8N257 | 88  | STITSBEVQTAV | FALSE | TRUE | FALSE | 23.2  |
| Q8N257 | 89  | TITSBEVQTAVB | FALSE | TRUE | FALSE | 34.62 |
| Q8N257 | 90  | ITSBEVQTAVBL | FALSE | TRUE | FALSE | 26.85 |
| Q8N257 | 91  | TSBEVQTAVBLL | FALSE | TRUE | FALSE | 10.7  |
| P0C1H6 | 35  | KQKBBGCBGSBB | FALSE | TRUE | FALSE | 13.32 |
| P0C1H6 | 37  | KBBGCBGSBBBH | FALSE | TRUE | FALSE | 12.23 |
| P0C1H6 | 38  | BBGCBGSBBBHA | FALSE | TRUE | FALSE | 15.34 |
| P0C1H6 | 39  | BGCBGSBBBHAN | FALSE | TRUE | FALSE | 24.43 |
| P0C1H6 | 40  | GCBGSBBBHANB | FALSE | TRUE | FALSE | 19.17 |
| P0C1H6 | 41  | CBGSBBBHANBB | FALSE | TRUE | FALSE | 14.4  |
| P0C1H6 | 42  | BGSBBBHANBBG | FALSE | TRUE | FALSE | 17.49 |
| P0C1H6 | 43  | GSBBBHANBBGD | FALSE | TRUE | FALSE | 23.38 |
| P0C1H6 | 44  | SBBBHANBBGDS | FALSE | TRUE | FALSE | 35.23 |
| P0C1H6 | 45  | BBBHANBBGDSF | FALSE | TRUE | FALSE | 43.83 |
| P0C1H6 | 46  | BBHANBBGDSFG | FALSE | TRUE | FALSE | 51.54 |
| P0C1H6 | 47  | BHANBBGDSFGD | FALSE | TRUE | FALSE | 52.85 |
| P0C1H6 | 48  | HANBBGDSFGDS | FALSE | TRUE | FALSE | 57.22 |
| P0C1H6 | 49  | ANBBGDSFGDSF | FALSE | TRUE | FALSE | 57.33 |
| P0C1H6 | 50  | NBBGDSFGDSFT | FALSE | TRUE | FALSE | 41.38 |
| P0C1H6 | 51  | BBGDSFGDSFTP | FALSE | TRUE | FALSE | 42.2  |
| P0C1H6 | 52  | BGDSFGDSFTPY | FALSE | TRUE | FALSE | 17.03 |
| P0C1H6 | 55  | SFGDSFTPYFPB | FALSE | TRUE | FALSE | 18.29 |
| P0C1H6 | 56  | FGDSFTPYFPBV | FALSE | TRUE | FALSE | 16.27 |
| P0C1H6 | 98  | TEAGQLAHYTKB | FALSE | TRUE | FALSE | 23.61 |
| P0C1H6 | 99  | EAGQLAHYTKBV | FALSE | TRUE | FALSE | 12.58 |
| P0C1H6 | 104 | AHYTKBVTITSB | FALSE | TRUE | FALSE | 12.39 |
| P0C1H6 | 105 | HYTKBVTITSBD | FALSE | TRUE | FALSE | 18.52 |
| P0C1H6 | 106 | YTKBVTITSBDI | FALSE | TRUE | FALSE | 13.92 |
| P0C1H6 | 108 | KBVTITSBDIQM | FALSE | TRUE | FALSE | 13.26 |
| P0C1H6 | 109 | BVTITSBDIQMA | FALSE | TRUE | FALSE | 11.28 |

|        |     |              |       |      |       |       |
|--------|-----|--------------|-------|------|-------|-------|
| P0C1H6 | 110 | VTITSBDIQMAV | FALSE | TRUE | FALSE | 14.24 |
| P0C1H6 | 111 | TITSBDIQMAVB | FALSE | TRUE | FALSE | 20.26 |
| P0C1H6 | 112 | ITSBDIQMAVBL | FALSE | TRUE | FALSE | 22.01 |
| P57053 | 30  | BKBSBKESYSVY | FALSE | TRUE | FALSE | 10.63 |
| P57053 | 69  | DIFEBIAGEASB | FALSE | TRUE | FALSE | 11.74 |
| P57053 | 70  | IFEBIAGEASBL | FALSE | TRUE | FALSE | 14.04 |
| P57053 | 71  | FEBIAGEASBLP | FALSE | TRUE | FALSE | 12.68 |
| P57053 | 76  | GEASBLPHYNKB | FALSE | TRUE | FALSE | 16.07 |
| P57053 | 77  | EASBLPHYNKBS | FALSE | TRUE | FALSE | 12.26 |
| P57053 | 79  | SBLPHYNKBSTI | FALSE | TRUE | FALSE | 10.39 |
| P57053 | 80  | BLPHYNKBSTIT | FALSE | TRUE | FALSE | 11.89 |
| P57053 | 81  | LPHYNKBSTITS | FALSE | TRUE | FALSE | 13.37 |
| P57053 | 82  | PHYNKBSTITSB | FALSE | TRUE | FALSE | 28.51 |
| P57053 | 83  | HYNKBSTITSBE | FALSE | TRUE | FALSE | 59.47 |
| P57053 | 84  | YNKBSTITSBEI | FALSE | TRUE | FALSE | 50.75 |
| P57053 | 85  | NKBSTITSBEIQ | FALSE | TRUE | FALSE | 38.71 |
| P57053 | 86  | KBSTITSBEIQT | FALSE | TRUE | FALSE | 35.85 |
| P57053 | 87  | BSTITSBEIQT  | FALSE | TRUE | FALSE | 26.45 |
| P57053 | 88  | STITSBEIQTAV | FALSE | TRUE | FALSE | 22.47 |
| P57053 | 89  | TITSBEIQTAVB | FALSE | TRUE | FALSE | 36.38 |
| P57053 | 90  | ITSBEIQTAVBL | FALSE | TRUE | FALSE | 27.17 |
| P57053 | 91  | TSBEIQTAVBLL | FALSE | TRUE | FALSE | 11.1  |
| Q7Z2G1 | 2   | LBTEVPBLPBST | FALSE | TRUE | FALSE | 10.3  |
| Q7Z2G1 | 3   | BTEVPBLPBSTT | FALSE | TRUE | FALSE | 11.34 |
| Q7Z2G1 | 6   | VPBLPBSTTAIV | FALSE | TRUE | FALSE | 11.43 |
| Q7Z2G1 | 59  | SKQBKGBHGPB  | FALSE | TRUE | FALSE | 12.24 |
| Q7Z2G1 | 60  | KQBKGBHGPBB  | FALSE | TRUE | FALSE | 11.62 |
| Q7Z2G1 | 61  | QBKGBHGPBBC  | FALSE | TRUE | FALSE | 29.3  |
| Q7Z2G1 | 62  | BKGBHGPBBCH  | FALSE | TRUE | FALSE | 21.95 |
| Q7Z2G1 | 63  | KBGBHGPBBCHS | FALSE | TRUE | FALSE | 26.17 |
| Q7Z2G1 | 64  | BGBHGPBBCHSN | FALSE | TRUE | FALSE | 32.06 |
| Q7Z2G1 | 65  | GBHGPBBCHSNC | FALSE | TRUE | FALSE | 14.55 |
| Q7Z2G1 | 66  | BHGPBBCHSNCB | FALSE | TRUE | FALSE | 14.72 |
| Q7Z2G1 | 67  | HGPBBCHSNCBG | FALSE | TRUE | FALSE | 16.2  |
| Q7Z2G1 | 68  | GPBBCHSNCBGD | FALSE | TRUE | FALSE | 14.89 |
| Q7Z2G1 | 69  | PBBCHSNCBGDS | FALSE | TRUE | FALSE | 11.95 |
| Q7Z2G1 | 70  | BBCHSNCBGDSF | FALSE | TRUE | FALSE | 18.46 |
| Q7Z2G1 | 75  | NCBGDSFATYFB | FALSE | TRUE | FALSE | 10.8  |
| Q7Z2G1 | 76  | CBGDSFATYFBB | FALSE | TRUE | FALSE | 28.49 |
| Q7Z2G1 | 77  | BGDSFATYFBBV | FALSE | TRUE | FALSE | 20.53 |
| Q7Z2G1 | 90  | KQVHQGLSLSBE | FALSE | TRUE | FALSE | 26.24 |
| Q7Z2G1 | 91  | QVHQGLSLSBEA | FALSE | TRUE | FALSE | 12.56 |
| Q7Z2G1 | 92  | VHQGLSLSBEAV | FALSE | TRUE | FALSE | 25.75 |
| Q7Z2G1 | 93  | HQGLSLSBEAVS | FALSE | TRUE | FALSE | 31.24 |
| Q7Z2G1 | 94  | QGLSLSBEAVSV | FALSE | TRUE | FALSE | 35.26 |
| Q7Z2G1 | 95  | GLSLSBEAVSVM | FALSE | TRUE | FALSE | 25.06 |
| Q7Z2G1 | 96  | LSLSBEAVSVM  | FALSE | TRUE | FALSE | 24.78 |
| Q7Z2G1 | 97  | SLSBEAVSVMDS | FALSE | TRUE | FALSE | 21.93 |
| Q7Z2G1 | 98  | LSBEAVSVMDSL | FALSE | TRUE | FALSE | 22.54 |
| Q7Z2G1 | 116 | BIATEAGBLABS | FALSE | TRUE | FALSE | 11.1  |
| Q7Z2G1 | 117 | IATEAGBLABST | FALSE | TRUE | FALSE | 16.2  |
| Q7Z2G1 | 118 | ATEAGBLABSTK | FALSE | TRUE | FALSE | 37.72 |

|            |     |              |       |      |       |       |
|------------|-----|--------------|-------|------|-------|-------|
| Q7Z2G1     | 119 | TEAGBLABSTKB | FALSE | TRUE | FALSE | 63.8  |
| Q7Z2G1     | 120 | EAGBLABSTKBQ | FALSE | TRUE | FALSE | 84.49 |
| Q7Z2G1     | 121 | AGBLABSTKBQT | FALSE | TRUE | FALSE | 31.83 |
| Q7Z2G1     | 122 | GBLABSTKBQTI | FALSE | TRUE | FALSE | 41.17 |
| Q7Z2G1     | 123 | BLABSTKBQTIT | FALSE | TRUE | FALSE | 48.23 |
| Q7Z2G1     | 124 | LABSTKBQTITA | FALSE | TRUE | FALSE | 25.13 |
| Q7Z2G1     | 125 | ABSTKBQTITAW | FALSE | TRUE | FALSE | 34.51 |
| Q7Z2G1     | 126 | BSTKBQTITAW  | FALSE | TRUE | FALSE | 31.88 |
| Q7Z2G1     | 127 | STKBQTITAWET | FALSE | TRUE | FALSE | 11.52 |
| Q7Z2G1     | 128 | TKBQTITAWETB | FALSE | TRUE | FALSE | 25.03 |
| Q7Z2G1     | 129 | KBQTITAWETBM | FALSE | TRUE | FALSE | 25.77 |
| Q7Z2G1     | 130 | BQTITAWETBMA | FALSE | TRUE | FALSE | 13.54 |
| Q7Z2G1     | 131 | QTITAWETBMAV | FALSE | TRUE | FALSE | 11.68 |
| Q7Z2G1     | 132 | TITAWETBMAVB | FALSE | TRUE | FALSE | 15.55 |
| Q7Z2G1     | 133 | ITAWETBMAVBL | FALSE | TRUE | FALSE | 23.85 |
| Q7Z2G1     | 134 | TAWETBMAVBLL | FALSE | TRUE | FALSE | 19.22 |
| Q7Z2G1     | 136 | WETBMAVBLLLP | FALSE | TRUE | FALSE | 10.2  |
| Q7Z2G1     | 137 | ETBMAVBLLLP  | FALSE | TRUE | FALSE | 12.64 |
| A0A024QZZ7 | 30  | BKBSBKESYSVY | FALSE | TRUE | FALSE | 10.63 |
| A0A024QZZ7 | 69  | DIFEBIAGEASB | FALSE | TRUE | FALSE | 11.74 |
| A0A024QZZ7 | 70  | IFEBIAGEASBL | FALSE | TRUE | FALSE | 14.04 |
| A0A024QZZ7 | 71  | FEBIAGEASBLA | FALSE | TRUE | FALSE | 12.3  |
| A0A024QZZ7 | 73  | BIAGEASBLAHY | FALSE | TRUE | FALSE | 12.32 |
| A0A024QZZ7 | 76  | GEASBLAHYNKB | FALSE | TRUE | FALSE | 27.97 |
| A0A024QZZ7 | 77  | EASBLAHYNKBS | FALSE | TRUE | FALSE | 18.81 |
| A0A024QZZ7 | 78  | ASBLAHYNKBST | FALSE | TRUE | FALSE | 10.93 |
| A0A024QZZ7 | 79  | SBLAHYNKBSTI | FALSE | TRUE | FALSE | 13.71 |
| A0A024QZZ7 | 80  | BLAHYNKBSTIT | FALSE | TRUE | FALSE | 13.18 |
| A0A024QZZ7 | 81  | LAHYNKBSTITS | FALSE | TRUE | FALSE | 12.76 |
| A0A024QZZ7 | 82  | AHYNKBSTITSB | FALSE | TRUE | FALSE | 26.57 |
| A0A024QZZ7 | 83  | HYNKBSTITSBE | FALSE | TRUE | FALSE | 59.47 |
| A0A024QZZ7 | 84  | YNKBSTITSBEI | FALSE | TRUE | FALSE | 50.75 |
| A0A024QZZ7 | 85  | NKBSTITSBEIQ | FALSE | TRUE | FALSE | 38.71 |
| A0A024QZZ7 | 86  | KBSTITSBEIQT | FALSE | TRUE | FALSE | 35.85 |
| A0A024QZZ7 | 87  | BSTITSBEIQT  | FALSE | TRUE | FALSE | 26.45 |
| A0A024QZZ7 | 88  | STITSBEIQTAV | FALSE | TRUE | FALSE | 22.47 |
| A0A024QZZ7 | 89  | TITSBEIQTAVB | FALSE | TRUE | FALSE | 36.38 |
| A0A024QZZ7 | 90  | ITSBEIQTAVBL | FALSE | TRUE | FALSE | 27.17 |
| A0A024QZZ7 | 91  | TSBEIQTAVBLL | FALSE | TRUE | FALSE | 11.1  |
| A0A024RCJ2 | 30  | BKBSBKESYSIY | FALSE | TRUE | FALSE | 11.41 |
| A0A024RCJ2 | 69  | DIFEBIAGEASB | FALSE | TRUE | FALSE | 11.74 |
| A0A024RCJ2 | 70  | IFEBIAGEASBL | FALSE | TRUE | FALSE | 14.04 |
| A0A024RCJ2 | 71  | FEBIAGEASBLA | FALSE | TRUE | FALSE | 12.3  |
| A0A024RCJ2 | 73  | BIAGEASBLAHY | FALSE | TRUE | FALSE | 12.32 |
| A0A024RCJ2 | 76  | GEASBLAHYNKB | FALSE | TRUE | FALSE | 27.97 |
| A0A024RCJ2 | 77  | EASBLAHYNKBS | FALSE | TRUE | FALSE | 18.81 |
| A0A024RCJ2 | 78  | ASBLAHYNKBST | FALSE | TRUE | FALSE | 10.93 |
| A0A024RCJ2 | 79  | SBLAHYNKBSTI | FALSE | TRUE | FALSE | 13.71 |
| A0A024RCJ2 | 80  | BLAHYNKBSTIT | FALSE | TRUE | FALSE | 13.18 |
| A0A024RCJ2 | 81  | LAHYNKBSTITS | FALSE | TRUE | FALSE | 12.76 |
| A0A024RCJ2 | 82  | AHYNKBSTITSB | FALSE | TRUE | FALSE | 26.57 |
| A0A024RCJ2 | 83  | HYNKBSTITSBE | FALSE | TRUE | FALSE | 59.47 |

|            |    |              |       |      |       |       |
|------------|----|--------------|-------|------|-------|-------|
| A0A024RCJ2 | 84 | YNKBSTITSBEI | FALSE | TRUE | FALSE | 50.75 |
| A0A024RCJ2 | 85 | NKBSTITSBEIQ | FALSE | TRUE | FALSE | 38.71 |
| A0A024RCJ2 | 86 | KBSTITSBEIQT | FALSE | TRUE | FALSE | 35.85 |
| A0A024RCJ2 | 87 | BSTITSBEIQTA | FALSE | TRUE | FALSE | 26.45 |
| A0A024RCJ2 | 88 | STITSBEIQTAV | FALSE | TRUE | FALSE | 22.47 |
| A0A024RCJ2 | 89 | TITSBEIQTAVB | FALSE | TRUE | FALSE | 36.38 |
| A0A024RCJ2 | 90 | ITSBEIQTAVBL | FALSE | TRUE | FALSE | 27.17 |
| A0A024RCJ2 | 91 | TSBEIQTAVBLL | FALSE | TRUE | FALSE | 11.1  |
| A0A024RCJ9 | 30 | BKBSBKESYSVY | FALSE | TRUE | FALSE | 10.63 |
| A0A024RCJ9 | 69 | DIFEBIAGEASB | FALSE | TRUE | FALSE | 11.74 |
| A0A024RCJ9 | 70 | IFEBIAGEASBL | FALSE | TRUE | FALSE | 14.04 |
| A0A024RCJ9 | 71 | FEBIAGEASBLA | FALSE | TRUE | FALSE | 12.3  |
| A0A024RCJ9 | 73 | BIAGEASBLAHY | FALSE | TRUE | FALSE | 12.32 |
| A0A024RCJ9 | 76 | GEASBLAHYNKB | FALSE | TRUE | FALSE | 27.97 |
| A0A024RCJ9 | 77 | EASBLAHYNKBS | FALSE | TRUE | FALSE | 18.81 |
| A0A024RCJ9 | 78 | ASBLAHYNKBST | FALSE | TRUE | FALSE | 10.93 |
| A0A024RCJ9 | 79 | SBLAHYNKBSTI | FALSE | TRUE | FALSE | 13.71 |
| A0A024RCJ9 | 80 | BLAHYNKBSTIT | FALSE | TRUE | FALSE | 13.18 |
| A0A024RCJ9 | 81 | LAHYNKBSTITS | FALSE | TRUE | FALSE | 12.76 |
| A0A024RCJ9 | 82 | AHYNKBSTITSB | FALSE | TRUE | FALSE | 26.57 |
| A0A024RCJ9 | 83 | HYNKBSTITSBE | FALSE | TRUE | FALSE | 59.47 |
| A0A024RCJ9 | 84 | YNKBSTITSBEI | FALSE | TRUE | FALSE | 50.75 |
| A0A024RCJ9 | 85 | NKBSTITSBEIQ | FALSE | TRUE | FALSE | 38.71 |
| A0A024RCJ9 | 86 | KBSTITSBEIQT | FALSE | TRUE | FALSE | 35.85 |
| A0A024RCJ9 | 87 | BSTITSBEIQTA | FALSE | TRUE | FALSE | 26.45 |
| A0A024RCJ9 | 88 | STITSBEIQTAV | FALSE | TRUE | FALSE | 22.47 |
| A0A024RCJ9 | 89 | TITSBEIQTAVB | FALSE | TRUE | FALSE | 36.38 |
| A0A024RCJ9 | 90 | ITSBEIQTAVBL | FALSE | TRUE | FALSE | 27.17 |
| A0A024RCJ9 | 91 | TSBEIQTAVBLL | FALSE | TRUE | FALSE | 11.1  |
| A0A024RCL8 | 30 | BKBSBKESYSVY | FALSE | TRUE | FALSE | 10.63 |
| A0A024RCL8 | 69 | DIFEBIAGEASB | FALSE | TRUE | FALSE | 11.74 |
| A0A024RCL8 | 70 | IFEBIAGEASBL | FALSE | TRUE | FALSE | 14.04 |
| A0A024RCL8 | 71 | FEBIAGEASBLA | FALSE | TRUE | FALSE | 12.3  |
| A0A024RCL8 | 73 | BIAGEASBLAHY | FALSE | TRUE | FALSE | 12.32 |
| A0A024RCL8 | 76 | GEASBLAHYNKB | FALSE | TRUE | FALSE | 27.97 |
| A0A024RCL8 | 77 | EASBLAHYNKBS | FALSE | TRUE | FALSE | 18.81 |
| A0A024RCL8 | 78 | ASBLAHYNKBST | FALSE | TRUE | FALSE | 10.93 |
| A0A024RCL8 | 79 | SBLAHYNKBSTI | FALSE | TRUE | FALSE | 13.71 |
| A0A024RCL8 | 80 | BLAHYNKBSTIT | FALSE | TRUE | FALSE | 13.18 |
| A0A024RCL8 | 81 | LAHYNKBSTITS | FALSE | TRUE | FALSE | 12.76 |
| A0A024RCL8 | 82 | AHYNKBSTITSB | FALSE | TRUE | FALSE | 26.57 |
| A0A024RCL8 | 83 | HYNKBSTITSBE | FALSE | TRUE | FALSE | 59.47 |
| A0A024RCL8 | 84 | YNKBSTITSBEI | FALSE | TRUE | FALSE | 50.75 |
| A0A024RCL8 | 85 | NKBSTITSBEIQ | FALSE | TRUE | FALSE | 38.71 |
| A0A024RCL8 | 86 | KBSTITSBEIQT | FALSE | TRUE | FALSE | 35.85 |
| A0A024RCL8 | 87 | BSTITSBEIQTA | FALSE | TRUE | FALSE | 26.45 |
| A0A024RCL8 | 88 | STITSBEIQTAV | FALSE | TRUE | FALSE | 22.47 |
| A0A024RCL8 | 89 | TITSBEIQTAVB | FALSE | TRUE | FALSE | 36.38 |
| A0A024RCL8 | 90 | ITSBEIQTAVBL | FALSE | TRUE | FALSE | 27.17 |
| A0A024RCL8 | 91 | TSBEIQTAVBLL | FALSE | TRUE | FALSE | 11.1  |
| A8K9J7     | 30 | BKBSBKESYSVY | FALSE | TRUE | FALSE | 10.63 |
| A8K9J7     | 69 | DIFEBIAGEASB | FALSE | TRUE | FALSE | 11.74 |

|        |    |               |       |      |       |       |
|--------|----|---------------|-------|------|-------|-------|
| A8K9J7 | 70 | IFEBIAGEASBL  | FALSE | TRUE | FALSE | 14.04 |
| A8K9J7 | 71 | FEBIAGEASBLA  | FALSE | TRUE | FALSE | 12.3  |
| A8K9J7 | 73 | BIAGEASBLAHY  | FALSE | TRUE | FALSE | 12.32 |
| A8K9J7 | 76 | GEASBLAHYNKB  | FALSE | TRUE | FALSE | 27.97 |
| A8K9J7 | 77 | EASBLAHYNKBS  | FALSE | TRUE | FALSE | 18.81 |
| A8K9J7 | 78 | ASBLAHYNKBST  | FALSE | TRUE | FALSE | 10.93 |
| A8K9J7 | 79 | SBLAHYNKBSTI  | FALSE | TRUE | FALSE | 13.71 |
| A8K9J7 | 80 | BLAHYNKBSTIT  | FALSE | TRUE | FALSE | 13.18 |
| A8K9J7 | 83 | HYNKBSTITFBE  | FALSE | TRUE | FALSE | 59.5  |
| A8K9J7 | 84 | YNKBSTITFBEI  | FALSE | TRUE | FALSE | 28.86 |
| A8K9J7 | 85 | NKBSTITFBEIQ  | FALSE | TRUE | FALSE | 18.54 |
| A8K9J7 | 86 | KBSTITFBEIQT  | FALSE | TRUE | FALSE | 22.96 |
| A8K9J7 | 87 | BSTITFBEIQTA  | FALSE | TRUE | FALSE | 14.43 |
| A8K9J7 | 88 | STITFBEIQTAV  | FALSE | TRUE | FALSE | 10.32 |
| A8K9J7 | 89 | TITFBEIQTAVB  | FALSE | TRUE | FALSE | 15.24 |
| A8K9J7 | 90 | ITFBEIQTAVBL  | FALSE | TRUE | FALSE | 12.87 |
| A9UJN3 | 2  | AHYTKBVTITSB  | FALSE | TRUE | FALSE | 12.39 |
| A9UJN3 | 3  | HYTKBVTITSBD  | FALSE | TRUE | FALSE | 18.52 |
| A9UJN3 | 4  | YTKBVTITSBDI  | FALSE | TRUE | FALSE | 13.92 |
| A9UJN3 | 6  | KBVTITSBDIQM  | FALSE | TRUE | FALSE | 13.26 |
| A9UJN3 | 7  | BVTITSBDIQMA  | FALSE | TRUE | FALSE | 11.28 |
| A9UJN3 | 8  | VTITSBDIQMAV  | FALSE | TRUE | FALSE | 14.24 |
| A9UJN3 | 9  | TITSBDIQMAVB  | FALSE | TRUE | FALSE | 20.26 |
| A9UJN3 | 10 | ITSBDIQMAVBL  | FALSE | TRUE | FALSE | 22.01 |
| B2R4S9 | 30 | BKBSBKESYSVY  | FALSE | TRUE | FALSE | 10.63 |
| B2R4S9 | 69 | DIFEBIAGEASB  | FALSE | TRUE | FALSE | 11.74 |
| B2R4S9 | 70 | IFEBIAGEASBL  | FALSE | TRUE | FALSE | 14.04 |
| B2R4S9 | 71 | FEBIAGEASBLA  | FALSE | TRUE | FALSE | 12.3  |
| B2R4S9 | 73 | BIAGEASBLAHY  | FALSE | TRUE | FALSE | 12.32 |
| B2R4S9 | 76 | GEASBLAHYNKB  | FALSE | TRUE | FALSE | 27.97 |
| B2R4S9 | 77 | EASBLAHYNKBS  | FALSE | TRUE | FALSE | 18.81 |
| B2R4S9 | 78 | ASBLAHYNKBST  | FALSE | TRUE | FALSE | 10.93 |
| B2R4S9 | 79 | SBLAHYNKBSTI  | FALSE | TRUE | FALSE | 13.71 |
| B2R4S9 | 80 | BLAHYNKBSTIT  | FALSE | TRUE | FALSE | 13.18 |
| B2R4S9 | 81 | LAHYNKBSTITS  | FALSE | TRUE | FALSE | 12.76 |
| B2R4S9 | 82 | AHYNKBSTITSB  | FALSE | TRUE | FALSE | 26.57 |
| B2R4S9 | 83 | HYNKBSTITSBE  | FALSE | TRUE | FALSE | 59.47 |
| B2R4S9 | 84 | YNKBSTITSBEI  | FALSE | TRUE | FALSE | 50.75 |
| B2R4S9 | 85 | NKBSTITSBEIQ  | FALSE | TRUE | FALSE | 38.71 |
| B2R4S9 | 86 | KBSTITSBEIQT  | FALSE | TRUE | FALSE | 35.85 |
| B2R4S9 | 87 | BSTITSBEIQT   | FALSE | TRUE | FALSE | 26.45 |
| B2R4S9 | 88 | STITSBIEIQTAV | FALSE | TRUE | FALSE | 22.47 |
| B2R4S9 | 89 | TITSBEIQTAVB  | FALSE | TRUE | FALSE | 36.38 |
| B2R4S9 | 90 | ITSBEIQTAVBL  | FALSE | TRUE | FALSE | 27.17 |
| B2R4S9 | 91 | TSBEIQTAVBLL  | FALSE | TRUE | FALSE | 11.1  |
| B4DR52 | 30 | BKBSBKESYSVY  | FALSE | TRUE | FALSE | 10.63 |
| B4DR52 | 69 | DIFEBIAGEASB  | FALSE | TRUE | FALSE | 11.74 |
| B4DR52 | 70 | IFEBIAGEASBL  | FALSE | TRUE | FALSE | 14.04 |
| B4DR52 | 71 | FEBIAGEASBLA  | FALSE | TRUE | FALSE | 12.3  |
| B4DR52 | 73 | BIAGEASBLAHY  | FALSE | TRUE | FALSE | 12.32 |
| B4DR52 | 76 | GEASBLAHYNKB  | FALSE | TRUE | FALSE | 27.97 |
| B4DR52 | 77 | EASBLAHYNKBS  | FALSE | TRUE | FALSE | 18.81 |



|        |    |              |       |      |       |       |
|--------|----|--------------|-------|------|-------|-------|
| B4DR52 | 78 | ASBLAHYNKBST | FALSE | TRUE | FALSE | 10.93 |
| B4DR52 | 79 | SBLAHYNKBSTI | FALSE | TRUE | FALSE | 13.71 |
| B4DR52 | 80 | BLAHYNKBSTIT | FALSE | TRUE | FALSE | 13.18 |
| B4DR52 | 81 | LAHYNKBSTITS | FALSE | TRUE | FALSE | 12.76 |
| B4DR52 | 82 | AHYNKBSTITSB | FALSE | TRUE | FALSE | 26.57 |
| B4DR52 | 83 | HYNKBSTITSBE | FALSE | TRUE | FALSE | 59.47 |
| B4DR52 | 84 | YNKBSTITSBEI | FALSE | TRUE | FALSE | 50.75 |
| B4DR52 | 85 | NKBSTITSBEIQ | FALSE | TRUE | FALSE | 38.71 |
| B4DR52 | 86 | KBSTITSBEIQT | FALSE | TRUE | FALSE | 35.85 |
| B4DR52 | 87 | BSTITSBEIQTA | FALSE | TRUE | FALSE | 26.45 |
| B4DR52 | 88 | STITSBEIQTAV | FALSE | TRUE | FALSE | 22.47 |
| B4DR52 | 89 | TITSBEIQTAVB | FALSE | TRUE | FALSE | 36.38 |
| B4DR52 | 90 | ITSBEIQTAVBL | FALSE | TRUE | FALSE | 27.17 |
| B4DR52 | 91 | TSBEIQTAVBLL | FALSE | TRUE | FALSE | 11.1  |
| I6L9F7 | 30 | BKBSBKESYSVY | FALSE | TRUE | FALSE | 10.63 |
| I6L9F7 | 69 | DIFEBIAGEASB | FALSE | TRUE | FALSE | 11.74 |
| I6L9F7 | 70 | IFEBIAGEASBL | FALSE | TRUE | FALSE | 14.04 |
| I6L9F7 | 71 | FEBIAGEASBLA | FALSE | TRUE | FALSE | 12.3  |
| I6L9F7 | 73 | BIAGEASBLAHY | FALSE | TRUE | FALSE | 12.32 |
| I6L9F7 | 76 | GEASBLAHYNKB | FALSE | TRUE | FALSE | 27.97 |
| I6L9F7 | 77 | EASBLAHYNKBS | FALSE | TRUE | FALSE | 18.81 |
| I6L9F7 | 78 | ASBLAHYNKBST | FALSE | TRUE | FALSE | 10.93 |
| I6L9F7 | 79 | SBLAHYNKBSTI | FALSE | TRUE | FALSE | 13.71 |
| I6L9F7 | 80 | BLAHYNKBSTIT | FALSE | TRUE | FALSE | 13.18 |
| I6L9F7 | 81 | LAHYNKBSTITS | FALSE | TRUE | FALSE | 12.76 |
| I6L9F7 | 82 | AHYNKBSTITSB | FALSE | TRUE | FALSE | 26.57 |
| I6L9F7 | 83 | HYNKBSTITSBE | FALSE | TRUE | FALSE | 59.47 |
| I6L9F7 | 84 | YNKBSTITSBEI | FALSE | TRUE | FALSE | 50.75 |
| I6L9F7 | 85 | NKBSTITSBEIQ | FALSE | TRUE | FALSE | 38.71 |
| I6L9F7 | 86 | KBSTITSBEIQT | FALSE | TRUE | FALSE | 35.85 |
| I6L9F7 | 87 | BSTITSBEIQTA | FALSE | TRUE | FALSE | 26.45 |
| I6L9F7 | 88 | STITSBEIQTAV | FALSE | TRUE | FALSE | 22.47 |
| I6L9F7 | 89 | TITSBEIQTAVB | FALSE | TRUE | FALSE | 36.38 |
| I6L9F7 | 90 | ITSBEIQTAVBL | FALSE | TRUE | FALSE | 27.17 |
| I6L9F7 | 91 | TSBEIQTAVBLL | FALSE | TRUE | FALSE | 11.1  |
| L0R4T3 | 17 | CEAABLAQYSGB | FALSE | TRUE | FALSE | 27.32 |
| L0R4T3 | 18 | EAABLAQYSGBT | FALSE | TRUE | FALSE | 25.01 |
| L0R4T3 | 19 | AABLAQYSGBTT | FALSE | TRUE | FALSE | 30.41 |
| L0R4T3 | 20 | ABLAQYSGBTTL | FALSE | TRUE | FALSE | 43.17 |
| L0R4T3 | 21 | BLAQYSGBTTLT | FALSE | TRUE | FALSE | 52.79 |
| L0R4T3 | 22 | LAQYSGBTTLTS | FALSE | TRUE | FALSE | 42.43 |
| L0R4T3 | 23 | AQYSGBTTLTSB | FALSE | TRUE | FALSE | 57.52 |
| L0R4T3 | 24 | QYSGBTTLTSBE | FALSE | TRUE | FALSE | 73.11 |
| L0R4T3 | 25 | YSGBTTLTSBEV | FALSE | TRUE | FALSE | 39.28 |
| L0R4T3 | 26 | SGBTTLTSBEVQ | FALSE | TRUE | FALSE | 42.44 |
| L0R4T3 | 27 | GBTTLTSBEVQT | FALSE | TRUE | FALSE | 39.26 |
| L0R4T3 | 28 | BTTLTSBEVQTA | FALSE | TRUE | FALSE | 24.91 |
| L0R4T3 | 29 | TTLTSBEVQTAV | FALSE | TRUE | FALSE | 24.65 |
| L0R4T3 | 30 | TLTSBEVQTAVB | FALSE | TRUE | FALSE | 28.68 |
| L0R4T3 | 31 | LTSBEVQTAVBL | FALSE | TRUE | FALSE | 21.9  |
| L0R4T3 | 32 | TSBEVQTAVBLL | FALSE | TRUE | FALSE | 10.7  |
| U3KQK0 | 30 | BKBSBKESYSVY | FALSE | TRUE | FALSE | 10.63 |

|        |     |              |       |      |       |       |
|--------|-----|--------------|-------|------|-------|-------|
| U3KQK0 | 69  | DIFEBIAGEASB | FALSE | TRUE | FALSE | 11.74 |
| U3KQK0 | 70  | IFEBIAGEASBL | FALSE | TRUE | FALSE | 14.04 |
| U3KQK0 | 71  | FEBIAGEASBLA | FALSE | TRUE | FALSE | 12.3  |
| U3KQK0 | 73  | BIAGEASBLAHY | FALSE | TRUE | FALSE | 12.32 |
| U3KQK0 | 76  | GEASBLAHYNKB | FALSE | TRUE | FALSE | 27.97 |
| U3KQK0 | 77  | EASBLAHYNKBS | FALSE | TRUE | FALSE | 18.81 |
| U3KQK0 | 78  | ASBLAHYNKBST | FALSE | TRUE | FALSE | 10.93 |
| U3KQK0 | 79  | SBLAHYNKBSTI | FALSE | TRUE | FALSE | 13.71 |
| U3KQK0 | 80  | BLAHYNKBSTIT | FALSE | TRUE | FALSE | 13.18 |
| U3KQK0 | 81  | LAHYNKBSTITS | FALSE | TRUE | FALSE | 12.76 |
| U3KQK0 | 82  | AHYNKBSTITSB | FALSE | TRUE | FALSE | 26.57 |
| U3KQK0 | 83  | HYNKBSTITSBE | FALSE | TRUE | FALSE | 59.47 |
| U3KQK0 | 84  | YNKBSTITSBEI | FALSE | TRUE | FALSE | 50.75 |
| U3KQK0 | 85  | NKBSTITSBEIQ | FALSE | TRUE | FALSE | 38.71 |
| U3KQK0 | 86  | KBSTITSBEIQT | FALSE | TRUE | FALSE | 35.85 |
| U3KQK0 | 87  | BSTITSBEIQT  | FALSE | TRUE | FALSE | 26.45 |
| U3KQK0 | 88  | STITSBEIQTAV | FALSE | TRUE | FALSE | 22.47 |
| U3KQK0 | 89  | TITSBEIQTAVB | FALSE | TRUE | FALSE | 36.38 |
| U3KQK0 | 90  | ITSBEIQTAVBL | FALSE | TRUE | FALSE | 27.17 |
| U3KQK0 | 91  | TSBEIQTAVBLL | FALSE | TRUE | FALSE | 11.1  |
| U3KQK0 | 154 | SNQSPDDIYIAB | FALSE | TRUE | FALSE | 18.25 |
| U3KQK0 | 155 | NQSPDDIYIABD | FALSE | TRUE | FALSE | 19.11 |
| W0TYI6 | 35  | KQKBBGCBGSBB | FALSE | TRUE | FALSE | 13.32 |
| W0TYI6 | 37  | KBBGCBGSBBBH | FALSE | TRUE | FALSE | 12.23 |
| W0TYI6 | 38  | BBGCBGSBBBHA | FALSE | TRUE | FALSE | 15.34 |
| W0TYI6 | 39  | BGCBGSBBBHAN | FALSE | TRUE | FALSE | 24.43 |
| W0TYI6 | 40  | GCBGSBBBHANB | FALSE | TRUE | FALSE | 19.17 |
| W0TYI6 | 41  | CBGSBBBHANBB | FALSE | TRUE | FALSE | 14.4  |
| W0TYI6 | 42  | BGSBBBHANBBG | FALSE | TRUE | FALSE | 17.49 |
| W0TYI6 | 43  | GSBBBHANBBGD | FALSE | TRUE | FALSE | 23.38 |
| W0TYI6 | 44  | SBBBHANBBGDS | FALSE | TRUE | FALSE | 35.23 |
| W0TYI6 | 45  | BBBHANBBGDSF | FALSE | TRUE | FALSE | 43.83 |
| W0TYI6 | 46  | BBHANBBGDSFG | FALSE | TRUE | FALSE | 51.54 |
| W0TYI6 | 47  | BHANBBGDSFGD | FALSE | TRUE | FALSE | 52.85 |
| W0TYI6 | 48  | HANBBGDSFGDS | FALSE | TRUE | FALSE | 57.22 |
| W0TYI6 | 49  | ANBBGDSFGDSF | FALSE | TRUE | FALSE | 57.33 |
| W0TYI6 | 50  | NBBGDSFGDSFT | FALSE | TRUE | FALSE | 41.38 |
| W0TYI6 | 51  | BBGDSFGDSFTP | FALSE | TRUE | FALSE | 42.2  |
| W0TYI6 | 52  | BGDSFGDSFTPY | FALSE | TRUE | FALSE | 17.03 |
| W0TYI6 | 55  | SFGDSFTPYFPB | FALSE | TRUE | FALSE | 18.29 |
| W0TYI6 | 56  | FGDSFTPYFPBV | FALSE | TRUE | FALSE | 16.27 |
| W0TYI6 | 98  | TEAGQLAHYTKB | FALSE | TRUE | FALSE | 23.61 |
| W0TYI6 | 99  | EAGQLAHYTKBV | FALSE | TRUE | FALSE | 12.58 |
| W0TYI6 | 104 | AHYTKBVTITSB | FALSE | TRUE | FALSE | 12.39 |
| W0TYI6 | 105 | HYTKBVTITSBD | FALSE | TRUE | FALSE | 18.52 |
| W0TYI6 | 106 | YTKBVTITSBDI | FALSE | TRUE | FALSE | 13.92 |
| W0TYI6 | 108 | KBVTITSBDIQM | FALSE | TRUE | FALSE | 13.26 |
| W0TYI6 | 109 | BVTITSBDIQMA | FALSE | TRUE | FALSE | 11.28 |
| W0TYI6 | 110 | VTITSBDIQMAV | FALSE | TRUE | FALSE | 14.24 |
| W0TYI6 | 111 | TITSBDIQMAVB | FALSE | TRUE | FALSE | 20.26 |
| W0TYI6 | 112 | ITSBDIQMAVBL | FALSE | TRUE | FALSE | 22.01 |
| Q6DN03 | 30  | BKBSBKESYSIY | FALSE | TRUE | FALSE | 11.41 |

|        |     |              |       |      |       |       |
|--------|-----|--------------|-------|------|-------|-------|
| Q6DN03 | 69  | DIFEBIAGEASB | FALSE | TRUE | FALSE | 11.74 |
| Q6DN03 | 70  | IFEBIAGEASBL | FALSE | TRUE | FALSE | 14.04 |
| Q6DN03 | 71  | FEBIAGEASBLA | FALSE | TRUE | FALSE | 12.3  |
| Q6DN03 | 73  | BIAGEASBLAHY | FALSE | TRUE | FALSE | 12.32 |
| Q6DN03 | 76  | GEASBLAHYNKB | FALSE | TRUE | FALSE | 27.97 |
| Q6DN03 | 77  | EASBLAHYNKBS | FALSE | TRUE | FALSE | 18.81 |
| Q6DN03 | 78  | ASBLAHYNKBST | FALSE | TRUE | FALSE | 10.93 |
| Q6DN03 | 79  | SBLAHYNKBSTI | FALSE | TRUE | FALSE | 13.71 |
| Q6DN03 | 80  | BLAHYNKBSTIT | FALSE | TRUE | FALSE | 13.18 |
| Q6DN03 | 81  | LAHYNKBSTITS | FALSE | TRUE | FALSE | 12.76 |
| Q6DN03 | 82  | AHYNKBSTITSB | FALSE | TRUE | FALSE | 26.57 |
| Q6DN03 | 83  | HYNKBSTITSBB | FALSE | TRUE | FALSE | 35.97 |
| Q6DN03 | 84  | YNKBSTITSBBS | FALSE | TRUE | FALSE | 42.34 |
| Q6DN03 | 85  | NKBSTITSBBSB | FALSE | TRUE | FALSE | 25.49 |
| Q6DN03 | 86  | KBSTITSBBSBB | FALSE | TRUE | FALSE | 14.17 |
| Q6DN03 | 87  | BSTITSBBSBBP | FALSE | TRUE | FALSE | 22.93 |
| Q6DN03 | 88  | STITSBBSBBPC | FALSE | TRUE | FALSE | 26.6  |
| Q6DN03 | 89  | TITSBBSBBPCA | FALSE | TRUE | FALSE | 25.63 |
| Q6DN03 | 90  | ITSBBSBBPCAC | FALSE | TRUE | FALSE | 18.17 |
| Q6DN03 | 106 | SWPSTPCPBAPB | FALSE | TRUE | FALSE | 11.49 |
| Q6DN03 | 109 | STPCPBAPBBSP | FALSE | TRUE | FALSE | 12.1  |
| Q6DN03 | 110 | TPCPBAPBBSPS | FALSE | TRUE | FALSE | 18.32 |
| Q6DN03 | 111 | PCPBAPBBSPST | FALSE | TRUE | FALSE | 11.44 |
| Q6DN03 | 112 | CPBAPBBSPSTP | FALSE | TRUE | FALSE | 17.88 |
| Q6DN03 | 113 | PBAPBBSPSTPA | FALSE | TRUE | FALSE | 15    |
| Q6DN03 | 114 | BAPBBSPSTPAP | FALSE | TRUE | FALSE | 14.88 |
| Q6DN03 | 115 | APBBSPSTPAPS | FALSE | TRUE | FALSE | 18.1  |
| Q6DN03 | 116 | PBBSPSTPAPSE | FALSE | TRUE | FALSE | 12    |
| Q6DN03 | 117 | BBSPSTPAPSES | FALSE | TRUE | FALSE | 10.31 |
| Q6DN03 | 128 | SLPGGABSLPP  | FALSE | TRUE | FALSE | 11.2  |
| Q6DN03 | 129 | LPGGABSLPPS  | FALSE | TRUE | FALSE | 13.73 |
| Q6DN03 | 130 | PGGABSLPPSL  | FALSE | TRUE | FALSE | 10.55 |
| Q6DN03 | 131 | GPGABSLPPSLP | FALSE | TRUE | FALSE | 25.51 |
| Q6DN03 | 132 | PGABSLPPSLPP | FALSE | TRUE | FALSE | 12.61 |
| Q6DN03 | 133 | GABSLPPSLPPB | FALSE | TRUE | FALSE | 27.26 |
| Q6DN03 | 134 | ABSLPPSLPPBV | FALSE | TRUE | FALSE | 19.51 |
| Q6DN03 | 178 | ASBLVNFBBAHN | FALSE | TRUE | FALSE | 11.57 |
| Q6DN03 | 179 | SBLVNFBBAHNT | FALSE | TRUE | FALSE | 15.2  |
| Q6DRA6 | 30  | BKBSBKESYSIY | FALSE | TRUE | FALSE | 11.41 |
| Q6DRA6 | 69  | DIFEBIAGEASB | FALSE | TRUE | FALSE | 11.74 |
| Q6DRA6 | 70  | IFEBIAGEASBL | FALSE | TRUE | FALSE | 14.04 |
| Q6DRA6 | 71  | FEBIAGEASBLA | FALSE | TRUE | FALSE | 12.3  |
| Q6DRA6 | 73  | BIAGEASBLAHY | FALSE | TRUE | FALSE | 12.32 |
| Q6DRA6 | 76  | GEASBLAHYNKB | FALSE | TRUE | FALSE | 27.97 |
| Q6DRA6 | 77  | EASBLAHYNKBS | FALSE | TRUE | FALSE | 18.81 |
| Q6DRA6 | 78  | ASBLAHYNKBST | FALSE | TRUE | FALSE | 10.93 |
| Q6DRA6 | 79  | SBLAHYNKBSTI | FALSE | TRUE | FALSE | 13.71 |
| Q6DRA6 | 80  | BLAHYNKBSTIT | FALSE | TRUE | FALSE | 13.18 |
| Q6DRA6 | 81  | LAHYNKBSTITS | FALSE | TRUE | FALSE | 12.76 |
| Q6DRA6 | 82  | AHYNKBSTITSB | FALSE | TRUE | FALSE | 26.57 |
| Q6DRA6 | 83  | HYNKBSTITSBB | FALSE | TRUE | FALSE | 35.97 |
| Q6DRA6 | 84  | YNKBSTITSBBS | FALSE | TRUE | FALSE | 42.34 |

|        |     |               |       |      |       |       |
|--------|-----|---------------|-------|------|-------|-------|
| Q6DRA6 | 85  | NKBSTITSBBSB  | FALSE | TRUE | FALSE | 25.49 |
| Q6DRA6 | 86  | KBSTITSBBSBB  | FALSE | TRUE | FALSE | 14.17 |
| Q6DRA6 | 87  | BSTITSBBSBBP  | FALSE | TRUE | FALSE | 22.93 |
| Q6DRA6 | 88  | STITSBBSBBPC  | FALSE | TRUE | FALSE | 26.6  |
| Q6DRA6 | 89  | TITSBBSBBPCA  | FALSE | TRUE | FALSE | 25.63 |
| Q6DRA6 | 90  | ITSBBSBBPCAC  | FALSE | TRUE | FALSE | 18.17 |
| Q6DRA6 | 106 | SWPSTPCPBAPB  | FALSE | TRUE | FALSE | 11.49 |
| Q6DRA6 | 109 | STPCPBAPBBSP  | FALSE | TRUE | FALSE | 12.1  |
| Q6DRA6 | 110 | TPCPBAPBBSPS  | FALSE | TRUE | FALSE | 18.32 |
| Q6DRA6 | 111 | PCPBAPBBSPST  | FALSE | TRUE | FALSE | 11.44 |
| Q6DRA6 | 112 | CPBAPBBSPSTP  | FALSE | TRUE | FALSE | 17.88 |
| Q6DRA6 | 113 | PBAPBBSPSTPA  | FALSE | TRUE | FALSE | 15    |
| Q6DRA6 | 114 | BAPBBSPSTPAP  | FALSE | TRUE | FALSE | 14.88 |
| Q6DRA6 | 115 | APBBSPSTPAPS  | FALSE | TRUE | FALSE | 18.1  |
| Q6DRA6 | 116 | PBBSPSTPAPSE  | FALSE | TRUE | FALSE | 12    |
| Q6DRA6 | 117 | BBSPPSTPAPSES | FALSE | TRUE | FALSE | 10.31 |
| Q6DRA6 | 128 | SLPGGABSLPP   | FALSE | TRUE | FALSE | 11.2  |
| Q6DRA6 | 129 | LPGGABSLPPS   | FALSE | TRUE | FALSE | 13.73 |
| Q6DRA6 | 130 | PGGABSLPPSL   | FALSE | TRUE | FALSE | 10.55 |
| Q6DRA6 | 131 | GPGABSLPPSLP  | FALSE | TRUE | FALSE | 25.51 |
| Q6DRA6 | 132 | PGABSLPPSLPP  | FALSE | TRUE | FALSE | 12.61 |
| Q6DRA6 | 133 | GABSLPPSLPPB  | FALSE | TRUE | FALSE | 27.26 |
| Q6DRA6 | 134 | ABSLPPSLPPBV  | FALSE | TRUE | FALSE | 19.51 |
| B2R4P9 | 40  | HBYBPGTVALBE  | FALSE | TRUE | FALSE | 37.04 |
| B2R4P9 | 41  | BYBPGTVALBEI  | FALSE | TRUE | FALSE | 26.82 |
| B2R4P9 | 42  | YBPGTVALBEIB  | FALSE | TRUE | FALSE | 24.47 |
| B2R4P9 | 43  | BPGTVALBEIBB  | FALSE | TRUE | FALSE | 20.28 |
| B2R4P9 | 44  | PGTVALBEIBBY  | FALSE | TRUE | FALSE | 20.42 |
| B2R4P9 | 45  | GTVLBEIBBYQ   | FALSE | TRUE | FALSE | 33.67 |
| B2R4P9 | 46  | TVALBEIBBYQK  | FALSE | TRUE | FALSE | 42.5  |
| B2R4P9 | 47  | VALBEIBBYQKS  | FALSE | TRUE | FALSE | 43.13 |
| B2R4P9 | 48  | ALBEIBBYQKST  | FALSE | TRUE | FALSE | 44.04 |
| B2R4P9 | 49  | LBEIBBYQKSTE  | FALSE | TRUE | FALSE | 59    |
| B2R4P9 | 50  | BEIBBYQKSTEL  | FALSE | TRUE | FALSE | 60.04 |
| B2R4P9 | 51  | EIBBYQKSTELL  | FALSE | TRUE | FALSE | 30.33 |
| B2R4P9 | 53  | BBYQKSTELLIB  | FALSE | TRUE | FALSE | 15.98 |
| B2R4P9 | 63  | IBKLPFQBLVBE  | FALSE | TRUE | FALSE | 31.44 |
| B2R4P9 | 64  | BKLPFQBLVBEI  | FALSE | TRUE | FALSE | 18.69 |
| B2R4P9 | 65  | KLPFQBLVBEIA  | FALSE | TRUE | FALSE | 12.76 |
| B2R4P9 | 66  | LPFQBLVBEIAQ  | FALSE | TRUE | FALSE | 17.93 |
| B2R4P9 | 67  | PFQBLVBEIAQD  | FALSE | TRUE | FALSE | 14.35 |
| B2R4P9 | 68  | FQBLVBEIAQDF  | FALSE | TRUE | FALSE | 22.12 |
| B2R4P9 | 69  | QBLVBEIAQDFK  | FALSE | TRUE | FALSE | 20.95 |
| B2R4P9 | 70  | BLVBEIAQDFKT  | FALSE | TRUE | FALSE | 21.91 |
| B2R4P9 | 73  | BEIAQDFKTDLB  | FALSE | TRUE | FALSE | 11.89 |
| B2R4P9 | 119 | TIMPKDIQLABB  | FALSE | TRUE | FALSE | 16.23 |
| B2R4P9 | 120 | IMPKDIQLABBI  | FALSE | TRUE | FALSE | 14.81 |
| B2R4P9 | 123 | KDIQLABBIBGE  | FALSE | TRUE | FALSE | 25.78 |
| B2R4P9 | 124 | DIQLABBIBGEB  | FALSE | TRUE | FALSE | 20.91 |
| B2R4P9 | 125 | IQLABBIBGEB   | FALSE | TRUE | FALSE | 24.4  |
| B4DEB1 | 40  | HBYBPGTVALBE  | FALSE | TRUE | FALSE | 37.04 |
| B4DEB1 | 41  | BYBPGTVALBEI  | FALSE | TRUE | FALSE | 26.82 |

|        |     |              |       |      |       |       |
|--------|-----|--------------|-------|------|-------|-------|
| B4DEB1 | 42  | YBPGTVALBEIB | FALSE | TRUE | FALSE | 24.47 |
| B4DEB1 | 43  | BPGTVALBEIBB | FALSE | TRUE | FALSE | 20.28 |
| B4DEB1 | 44  | PGTVALBEIBBY | FALSE | TRUE | FALSE | 20.42 |
| B4DEB1 | 45  | GTVALBEIBBYQ | FALSE | TRUE | FALSE | 33.67 |
| B4DEB1 | 46  | TVALBEIBBYQK | FALSE | TRUE | FALSE | 42.5  |
| B4DEB1 | 47  | VALBEIBBYQKS | FALSE | TRUE | FALSE | 43.13 |
| B4DEB1 | 48  | ALBEIBBYQKST | FALSE | TRUE | FALSE | 44.04 |
| B4DEB1 | 49  | LBEIBBYQKSTE | FALSE | TRUE | FALSE | 59    |
| B4DEB1 | 50  | BEIBBYQKSTEL | FALSE | TRUE | FALSE | 60.04 |
| B4DEB1 | 51  | EIBBYQKSTELL | FALSE | TRUE | FALSE | 30.33 |
| B4DEB1 | 53  | BBYQKSTELLIB | FALSE | TRUE | FALSE | 15.98 |
| B4DEB1 | 63  | IBKLPFQBLVBE | FALSE | TRUE | FALSE | 31.44 |
| B4DEB1 | 64  | BKLPFQBLVBEI | FALSE | TRUE | FALSE | 18.69 |
| B4DEB1 | 65  | KLPFQBLVBEIA | FALSE | TRUE | FALSE | 12.76 |
| B4DEB1 | 66  | LPFQBLVBEIAQ | FALSE | TRUE | FALSE | 17.93 |
| B4DEB1 | 67  | PFQBLVBEIAQD | FALSE | TRUE | FALSE | 14.35 |
| B4DEB1 | 68  | FQBLVBEIAQDF | FALSE | TRUE | FALSE | 22.12 |
| B4DEB1 | 69  | QBLVBEIAQDFK | FALSE | TRUE | FALSE | 20.95 |
| B4DEB1 | 70  | BLVBEIAQDFKT | FALSE | TRUE | FALSE | 21.91 |
| B4DEB1 | 73  | BEIAQDFKTDLB | FALSE | TRUE | FALSE | 11.89 |
| K7EK07 | 40  | HBYBPGTVALBE | FALSE | TRUE | FALSE | 37.04 |
| K7EK07 | 41  | BYBPGTVALBEI | FALSE | TRUE | FALSE | 26.82 |
| K7EK07 | 42  | YBPGTVALBEIB | FALSE | TRUE | FALSE | 24.47 |
| K7EK07 | 43  | BPGTVALBEIBB | FALSE | TRUE | FALSE | 20.28 |
| K7EK07 | 44  | PGTVALBEIBBY | FALSE | TRUE | FALSE | 20.42 |
| K7EK07 | 45  | GTVALBEIBBYQ | FALSE | TRUE | FALSE | 33.67 |
| K7EK07 | 46  | TVALBEIBBYQK | FALSE | TRUE | FALSE | 42.5  |
| K7EK07 | 47  | VALBEIBBYQKS | FALSE | TRUE | FALSE | 43.13 |
| K7EK07 | 48  | ALBEIBBYQKST | FALSE | TRUE | FALSE | 44.04 |
| K7EK07 | 49  | LBEIBBYQKSTE | FALSE | TRUE | FALSE | 59    |
| K7EK07 | 50  | BEIBBYQKSTEL | FALSE | TRUE | FALSE | 60.04 |
| K7EK07 | 51  | EIBBYQKSTELL | FALSE | TRUE | FALSE | 30.33 |
| K7EK07 | 53  | BBYQKSTELLIB | FALSE | TRUE | FALSE | 15.98 |
| K7EK07 | 63  | IBKLPFQBLVBE | FALSE | TRUE | FALSE | 31.44 |
| K7EK07 | 64  | BKLPFQBLVBEI | FALSE | TRUE | FALSE | 18.69 |
| K7EK07 | 65  | KLPFQBLVBEIA | FALSE | TRUE | FALSE | 12.76 |
| K7EK07 | 66  | LPFQBLVBEIAQ | FALSE | TRUE | FALSE | 17.93 |
| K7EK07 | 67  | PFQBLVBEIAQD | FALSE | TRUE | FALSE | 14.35 |
| K7EK07 | 68  | FQBLVBEIAQDF | FALSE | TRUE | FALSE | 22.12 |
| K7EK07 | 69  | QBLVBEIAQDFK | FALSE | TRUE | FALSE | 20.95 |
| K7EK07 | 70  | BLVBEIAQDFKT | FALSE | TRUE | FALSE | 21.91 |
| K7EK07 | 73  | BEIAQDFKTDLB | FALSE | TRUE | FALSE | 11.89 |
| K7EK07 | 119 | TIMPKDIQLABB | FALSE | TRUE | FALSE | 16.23 |
| K7EK07 | 120 | IMPKDIQLABBI | FALSE | TRUE | FALSE | 14.81 |
| Q5TEC6 | 40  | HBYBPGTVALBE | FALSE | TRUE | FALSE | 37.04 |
| Q5TEC6 | 41  | BYBPGTVALBEI | FALSE | TRUE | FALSE | 26.82 |
| Q5TEC6 | 42  | YBPGTVALBEIB | FALSE | TRUE | FALSE | 24.47 |
| Q5TEC6 | 43  | BPGTVALBEIBB | FALSE | TRUE | FALSE | 20.28 |
| Q5TEC6 | 44  | PGTVALBEIBBY | FALSE | TRUE | FALSE | 20.42 |
| Q5TEC6 | 45  | GTVALBEIBBYQ | FALSE | TRUE | FALSE | 33.67 |
| Q5TEC6 | 46  | TVALBEIBBYQK | FALSE | TRUE | FALSE | 42.5  |
| Q5TEC6 | 47  | VALBEIBBYQKS | FALSE | TRUE | FALSE | 43.13 |

|        |     |              |       |      |       |       |
|--------|-----|--------------|-------|------|-------|-------|
| Q5TEC6 | 48  | ALBEIBBYQKST | FALSE | TRUE | FALSE | 44.04 |
| Q5TEC6 | 49  | LBEIBBYQKSTE | FALSE | TRUE | FALSE | 59    |
| Q5TEC6 | 50  | BEIBBYQKSTEL | FALSE | TRUE | FALSE | 60.04 |
| Q5TEC6 | 51  | EIBBYQKSTELL | FALSE | TRUE | FALSE | 30.33 |
| Q5TEC6 | 53  | BBYQKSTELLIB | FALSE | TRUE | FALSE | 15.98 |
| Q5TEC6 | 63  | IBKLPFQBLVBE | FALSE | TRUE | FALSE | 31.44 |
| Q5TEC6 | 64  | BKLPFQBLVBEI | FALSE | TRUE | FALSE | 18.69 |
| Q5TEC6 | 65  | KLPFQBLVBEIA | FALSE | TRUE | FALSE | 12.76 |
| Q5TEC6 | 66  | LPFQBLVBEIAQ | FALSE | TRUE | FALSE | 17.93 |
| Q5TEC6 | 67  | PFQBLVBEIAQE | FALSE | TRUE | FALSE | 13.13 |
| Q5TEC6 | 68  | FQBLVBEIAQEF | FALSE | TRUE | FALSE | 19.8  |
| Q5TEC6 | 69  | QBLVBEIAQEFK | FALSE | TRUE | FALSE | 19.18 |
| Q5TEC6 | 70  | BLVBEIAQEFKT | FALSE | TRUE | FALSE | 19.99 |
| Q5TEC6 | 71  | LVBEIAQEFKTD | FALSE | TRUE | FALSE | 10.43 |
| Q5TEC6 | 73  | BEIAQEFKTDLB | FALSE | TRUE | FALSE | 10.49 |
| Q5TEC6 | 92  | ALQEABEAYLVG | FALSE | TRUE | FALSE | 13.23 |
| Q5TEC6 | 93  | LQEABEAYLVGL | FALSE | TRUE | FALSE | 10.79 |
| Q5TEC6 | 123 | KDIQLVSBIBGE | FALSE | TRUE | FALSE | 21.71 |
| Q5TEC6 | 124 | DIQLVSBIBGEB | FALSE | TRUE | FALSE | 20.15 |
| Q5TEC6 | 125 | IQLVSBIBGEB  | FALSE | TRUE | FALSE | 26.23 |
| A8K4Y7 | 40  | HBYBPGTVALBE | FALSE | TRUE | FALSE | 37.04 |
| A8K4Y7 | 41  | BYBPGTVALBEI | FALSE | TRUE | FALSE | 26.82 |
| A8K4Y7 | 42  | YBPGTVALBEIB | FALSE | TRUE | FALSE | 24.47 |
| A8K4Y7 | 43  | BPGTVALBEIBB | FALSE | TRUE | FALSE | 20.28 |
| A8K4Y7 | 44  | PGTVALBEIBBY | FALSE | TRUE | FALSE | 20.42 |
| A8K4Y7 | 45  | GTVALBEIBBYQ | FALSE | TRUE | FALSE | 33.67 |
| A8K4Y7 | 46  | TVALBEIBBYQK | FALSE | TRUE | FALSE | 42.5  |
| A8K4Y7 | 47  | VALBEIBBYQKS | FALSE | TRUE | FALSE | 43.13 |
| A8K4Y7 | 48  | ALBEIBBYQKST | FALSE | TRUE | FALSE | 44.04 |
| A8K4Y7 | 49  | LBEIBBYQKSTE | FALSE | TRUE | FALSE | 59    |
| A8K4Y7 | 50  | BEIBBYQKSTEF | FALSE | TRUE | FALSE | 59.95 |
| A8K4Y7 | 51  | EIBBYQKSTEF  | FALSE | TRUE | FALSE | 27.63 |
| A8K4Y7 | 53  | BBYQKSTEFLIB | FALSE | TRUE | FALSE | 24.04 |
| A8K4Y7 | 63  | IBKLPFQBLVBE | FALSE | TRUE | FALSE | 31.44 |
| A8K4Y7 | 64  | BKLPFQBLVBEI | FALSE | TRUE | FALSE | 18.69 |
| A8K4Y7 | 65  | KLPFQBLVBEIA | FALSE | TRUE | FALSE | 12.76 |
| A8K4Y7 | 66  | LPFQBLVBEIAQ | FALSE | TRUE | FALSE | 17.93 |
| A8K4Y7 | 67  | PFQBLVBEIAQD | FALSE | TRUE | FALSE | 14.35 |
| A8K4Y7 | 68  | FQBLVBEIAQDF | FALSE | TRUE | FALSE | 22.12 |
| A8K4Y7 | 69  | QBLVBEIAQDFK | FALSE | TRUE | FALSE | 20.95 |
| A8K4Y7 | 70  | BLVBEIAQDFKT | FALSE | TRUE | FALSE | 21.91 |
| A8K4Y7 | 73  | BEIAQDFKTDLB | FALSE | TRUE | FALSE | 11.89 |
| A8K4Y7 | 119 | TIMPKDIQLABB | FALSE | TRUE | FALSE | 16.23 |
| A8K4Y7 | 120 | IMPKDIQLABBI | FALSE | TRUE | FALSE | 14.81 |
| A8K4Y7 | 123 | KDIQLABBIBGE | FALSE | TRUE | FALSE | 25.78 |
| A8K4Y7 | 124 | DIQLABBIBGEB | FALSE | TRUE | FALSE | 20.91 |
| A8K4Y7 | 125 | IQLABBIBGEB  | FALSE | TRUE | FALSE | 24.4  |
| B2R6Y1 | 40  | HBYBPGTVALBE | FALSE | TRUE | FALSE | 37.04 |
| B2R6Y1 | 41  | BYBPGTVALBEI | FALSE | TRUE | FALSE | 26.82 |
| B2R6Y1 | 42  | YBPGTVALBEIB | FALSE | TRUE | FALSE | 24.47 |
| B2R6Y1 | 43  | BPGTVALBEIBB | FALSE | TRUE | FALSE | 20.28 |
| B2R6Y1 | 44  | PGTVALBEIBBY | FALSE | TRUE | FALSE | 20.42 |

|        |     |              |       |      |       |       |
|--------|-----|--------------|-------|------|-------|-------|
| B2R6Y1 | 45  | GTVALBEIBBYQ | FALSE | TRUE | FALSE | 33.67 |
| B2R6Y1 | 46  | TVALBEIBBYQK | FALSE | TRUE | FALSE | 42.5  |
| B2R6Y1 | 47  | VALBEIBBYQKS | FALSE | TRUE | FALSE | 43.13 |
| B2R6Y1 | 48  | ALBEIBBYQKST | FALSE | TRUE | FALSE | 44.04 |
| B2R6Y1 | 49  | LBEIBBYQKSTE | FALSE | TRUE | FALSE | 59    |
| B2R6Y1 | 50  | BEIBBYQKSTEL | FALSE | TRUE | FALSE | 60.04 |
| B2R6Y1 | 51  | EIBBYQKSTELL | FALSE | TRUE | FALSE | 30.33 |
| B2R6Y1 | 53  | BBYQKSTELLIB | FALSE | TRUE | FALSE | 15.98 |
| B2R6Y1 | 63  | IBKLPFQBLVBE | FALSE | TRUE | FALSE | 31.44 |
| B2R6Y1 | 64  | BKLPFQBLVBEI | FALSE | TRUE | FALSE | 18.69 |
| B2R6Y1 | 65  | KLPFQBLVBEIA | FALSE | TRUE | FALSE | 12.76 |
| B2R6Y1 | 66  | LPFQBLVBEIAQ | FALSE | TRUE | FALSE | 17.93 |
| B2R6Y1 | 67  | PFQBLVBEIAQD | FALSE | TRUE | FALSE | 14.35 |
| B2R6Y1 | 68  | FQBLVBEIAQDF | FALSE | TRUE | FALSE | 22.12 |
| B2R6Y1 | 69  | QBLVBEIAQDFK | FALSE | TRUE | FALSE | 20.95 |
| B2R6Y1 | 70  | BLVBEIAQDFKT | FALSE | TRUE | FALSE | 21.91 |
| B2R6Y1 | 73  | BEIAQDFKTDLB | FALSE | TRUE | FALSE | 11.89 |
| B2R6Y1 | 119 | TIMPNDIQLABB | FALSE | TRUE | FALSE | 12.59 |
| B2R6Y1 | 120 | IMPNDIQLABBI | FALSE | TRUE | FALSE | 12.79 |
| B2R6Y1 | 121 | MPNDIQLABBIB | FALSE | TRUE | FALSE | 10.39 |
| B2R6Y1 | 123 | NDIQLABBIBGE | FALSE | TRUE | FALSE | 28.14 |
| B2R6Y1 | 124 | DIQLABBIBGEB | FALSE | TRUE | FALSE | 20.91 |
| B2R6Y1 | 125 | IQLABBIBGEB  | FALSE | TRUE | FALSE | 24.4  |
| B4E380 | 40  | HBYBPGTVALBE | FALSE | TRUE | FALSE | 37.04 |
| B4E380 | 41  | BYBPGTVALBEI | FALSE | TRUE | FALSE | 26.82 |
| B4E380 | 42  | YBPGTVALBEIB | FALSE | TRUE | FALSE | 24.47 |
| B4E380 | 43  | BPGTVALBEIBB | FALSE | TRUE | FALSE | 20.28 |
| B4E380 | 44  | PGTVALBEIBBY | FALSE | TRUE | FALSE | 20.42 |
| B4E380 | 45  | GTVALBEIBBYQ | FALSE | TRUE | FALSE | 33.67 |
| B4E380 | 46  | TVALBEIBBYQK | FALSE | TRUE | FALSE | 42.5  |
| B4E380 | 47  | VALBEIBBYQKS | FALSE | TRUE | FALSE | 43.13 |
| B4E380 | 48  | ALBEIBBYQKST | FALSE | TRUE | FALSE | 44.04 |
| B4E380 | 49  | LBEIBBYQKSTE | FALSE | TRUE | FALSE | 59    |
| B4E380 | 50  | BEIBBYQKSTEL | FALSE | TRUE | FALSE | 60.04 |
| B4E380 | 51  | EIBBYQKSTELL | FALSE | TRUE | FALSE | 30.33 |
| B4E380 | 53  | BBYQKSTELLIB | FALSE | TRUE | FALSE | 15.98 |
| B4E380 | 63  | IBKLPFQBLVBE | FALSE | TRUE | FALSE | 31.44 |
| B4E380 | 64  | BKLPFQBLVBEI | FALSE | TRUE | FALSE | 18.69 |
| B4E380 | 65  | KLPFQBLVBEIA | FALSE | TRUE | FALSE | 12.76 |
| B4E380 | 66  | LPFQBLVBEIAQ | FALSE | TRUE | FALSE | 17.93 |
| B4E380 | 67  | PFQBLVBEIAQD | FALSE | TRUE | FALSE | 14.35 |
| B4E380 | 68  | FQBLVBEIAQDF | FALSE | TRUE | FALSE | 22.12 |
| B4E380 | 69  | QBLVBEIAQDFK | FALSE | TRUE | FALSE | 20.95 |
| B4E380 | 70  | BLVBEIAQDFKT | FALSE | TRUE | FALSE | 21.91 |
| B4E380 | 73  | BEIAQDFKTDLB | FALSE | TRUE | FALSE | 11.89 |
| B4E380 | 96  | TIMPKDIQLABB | FALSE | TRUE | FALSE | 16.23 |
| B4E380 | 97  | IMPKDIQLABBI | FALSE | TRUE | FALSE | 14.81 |
| B4E380 | 100 | KDIQLABBIBGE | FALSE | TRUE | FALSE | 25.78 |
| B4E380 | 101 | DIQLABBIBGEB | FALSE | TRUE | FALSE | 20.91 |
| B4E380 | 102 | IQLABBIBGEB  | FALSE | TRUE | FALSE | 24.4  |
| K7EMV3 | 40  | HBYBPGTVALBE | FALSE | TRUE | FALSE | 37.04 |
| K7EMV3 | 41  | BYBPGTVALBEI | FALSE | TRUE | FALSE | 26.82 |

|        |     |              |       |      |       |       |
|--------|-----|--------------|-------|------|-------|-------|
| K7EMV3 | 42  | YBPGTVALBEIB | FALSE | TRUE | FALSE | 24.47 |
| K7EMV3 | 43  | BPGTVALBEIBB | FALSE | TRUE | FALSE | 20.28 |
| K7EMV3 | 44  | PGTVALBEIBBY | FALSE | TRUE | FALSE | 20.42 |
| K7EMV3 | 45  | GTVALBEIBBYQ | FALSE | TRUE | FALSE | 33.67 |
| K7EMV3 | 46  | TVALBEIBBYQK | FALSE | TRUE | FALSE | 42.5  |
| K7EMV3 | 47  | VALBEIBBYQKS | FALSE | TRUE | FALSE | 43.13 |
| K7EMV3 | 48  | ALBEIBBYQKST | FALSE | TRUE | FALSE | 44.04 |
| K7EMV3 | 49  | LBEIBBYQKSTE | FALSE | TRUE | FALSE | 59    |
| K7EMV3 | 50  | BEIBBYQKSTEL | FALSE | TRUE | FALSE | 60.04 |
| K7EMV3 | 51  | EIBBYQKSTELL | FALSE | TRUE | FALSE | 30.33 |
| K7EMV3 | 53  | BBYQKSTELLIB | FALSE | TRUE | FALSE | 15.98 |
| K7EMV3 | 63  | IBKLPFQBLVBE | FALSE | TRUE | FALSE | 31.44 |
| K7EMV3 | 64  | BKLPFQBLVBEI | FALSE | TRUE | FALSE | 18.69 |
| K7EMV3 | 65  | KLPFQBLVBEIA | FALSE | TRUE | FALSE | 12.76 |
| K7EMV3 | 66  | LPFQBLVBEIAQ | FALSE | TRUE | FALSE | 17.93 |
| K7EMV3 | 67  | PFQBLVBEIAQD | FALSE | TRUE | FALSE | 14.35 |
| K7EMV3 | 68  | FQBLVBEIAQDF | FALSE | TRUE | FALSE | 22.12 |
| K7EMV3 | 69  | QBLVBEIAQDFK | FALSE | TRUE | FALSE | 20.95 |
| K7EMV3 | 70  | BLVBEIAQDFKT | FALSE | TRUE | FALSE | 21.91 |
| K7EMV3 | 73  | BEIAQDFKTDLB | FALSE | TRUE | FALSE | 11.89 |
| K7EP01 | 40  | HBYBPGTVALBE | FALSE | TRUE | FALSE | 37.04 |
| K7EP01 | 41  | BYBPGTVALBEI | FALSE | TRUE | FALSE | 26.82 |
| K7EP01 | 42  | YBPGTVALBEIB | FALSE | TRUE | FALSE | 24.47 |
| K7EP01 | 43  | BPGTVALBEIBB | FALSE | TRUE | FALSE | 20.28 |
| K7EP01 | 44  | PGTVALBEIBBY | FALSE | TRUE | FALSE | 20.42 |
| K7EP01 | 45  | GTVALBEIBBYQ | FALSE | TRUE | FALSE | 33.67 |
| K7EP01 | 46  | TVALBEIBBYQK | FALSE | TRUE | FALSE | 42.5  |
| K7EP01 | 47  | VALBEIBBYQKS | FALSE | TRUE | FALSE | 43.13 |
| K7EP01 | 48  | ALBEIBBYQKST | FALSE | TRUE | FALSE | 44.04 |
| K7EP01 | 49  | LBEIBBYQKSTE | FALSE | TRUE | FALSE | 59    |
| K7EP01 | 50  | BEIBBYQKSTEL | FALSE | TRUE | FALSE | 60.04 |
| K7EP01 | 51  | EIBBYQKSTELL | FALSE | TRUE | FALSE | 30.33 |
| K7EP01 | 53  | BBYQKSTELLIB | FALSE | TRUE | FALSE | 15.98 |
| K7EP01 | 60  | ELLIBKLPFQBB | FALSE | TRUE | FALSE | 14.26 |
| K7EP01 | 82  | KIPTCVPSTLBE | FALSE | TRUE | FALSE | 11.22 |
| K7EP01 | 85  | TCVPSTLBESPS | FALSE | TRUE | FALSE | 10.14 |
| K7EP01 | 89  | STLBESPSCPKT | FALSE | TRUE | FALSE | 15.21 |
| K7EP01 | 90  | TLBESPSCPKTS | FALSE | TRUE | FALSE | 11.52 |
| K7EP01 | 99  | KTSSWLAGYGEB | FALSE | TRUE | FALSE | 10.96 |
| K7EP01 | 101 | SSWLAGYGEBEL | FALSE | TRUE | FALSE | 10.28 |
| K7EP01 | 102 | SWLAGYGEBELK | FALSE | TRUE | FALSE | 21.97 |
| K7ES00 | 40  | HBYBPGTVALBE | FALSE | TRUE | FALSE | 37.04 |
| K7ES00 | 41  | BYBPGTVALBEI | FALSE | TRUE | FALSE | 26.82 |
| K7ES00 | 42  | YBPGTVALBEIB | FALSE | TRUE | FALSE | 24.47 |
| K7ES00 | 43  | BPGTVALBEIBB | FALSE | TRUE | FALSE | 20.28 |
| K7ES00 | 44  | PGTVALBEIBBY | FALSE | TRUE | FALSE | 20.42 |
| K7ES00 | 45  | GTVALBEIBBYQ | FALSE | TRUE | FALSE | 33.67 |
| K7ES00 | 46  | TVALBEIBBYQK | FALSE | TRUE | FALSE | 42.5  |
| K7ES00 | 47  | VALBEIBBYQKS | FALSE | TRUE | FALSE | 43.13 |
| K7ES00 | 48  | ALBEIBBYQKST | FALSE | TRUE | FALSE | 44.04 |
| K7ES00 | 49  | LBEIBBYQKSTE | FALSE | TRUE | FALSE | 59    |
| K7ES00 | 50  | BEIBBYQKSTEL | FALSE | TRUE | FALSE | 60.04 |



|        |     |              |       |      |       |       |
|--------|-----|--------------|-------|------|-------|-------|
| K7ES00 | 51  | EIBBYQKSTELL | FALSE | TRUE | FALSE | 30.33 |
| K7ES00 | 53  | BBYQKSTELLIB | FALSE | TRUE | FALSE | 15.98 |
| K7ES00 | 63  | IBKLPFQBLVBE | FALSE | TRUE | FALSE | 31.44 |
| K7ES00 | 64  | BKLPFQBLVBEI | FALSE | TRUE | FALSE | 18.69 |
| K7ES00 | 65  | KLPFQBLVBEIA | FALSE | TRUE | FALSE | 12.76 |
| K7ES00 | 66  | LPFQBLVBEIAQ | FALSE | TRUE | FALSE | 17.93 |
| K7ES00 | 67  | PFQBLVBEIAQD | FALSE | TRUE | FALSE | 14.35 |
| K7ES00 | 68  | FQBLVBEIAQDF | FALSE | TRUE | FALSE | 22.12 |
| K7ES00 | 69  | QBLVBEIAQDFK | FALSE | TRUE | FALSE | 20.95 |
| K7ES00 | 70  | BLVBEIAQDFKT | FALSE | TRUE | FALSE | 21.91 |
| K7ES00 | 73  | BEIAQDFKTDLB | FALSE | TRUE | FALSE | 11.89 |
| K7ES00 | 87  | SAAIGALQVBQB | FALSE | TRUE | FALSE | 10.34 |
| K7ES00 | 88  | AAIGALQVBQBP | FALSE | TRUE | FALSE | 11.42 |
| K7ES00 | 89  | AIGALQVBQBPG | FALSE | TRUE | FALSE | 14.76 |
| K7ES00 | 90  | IGALQVBQBPGA | FALSE | TRUE | FALSE | 13.06 |
| K7ES00 | 91  | GALQVBQBPGAG | FALSE | TRUE | FALSE | 10.67 |
| K7ES00 | 100 | GAGGGLGGFBSP | FALSE | TRUE | FALSE | 15.81 |
| K7ES00 | 102 | GGGLGGFBSPSG | FALSE | TRUE | FALSE | 13.14 |
| K7ES00 | 135 | KIPTCVPSTLBE | FALSE | TRUE | FALSE | 11.22 |
| K7ES00 | 138 | TCVPSTLBESPS | FALSE | TRUE | FALSE | 10.14 |
| P68431 | 40  | HBYBPGTVALBE | FALSE | TRUE | FALSE | 37.04 |
| P68431 | 41  | BYBPGTVALBEI | FALSE | TRUE | FALSE | 26.82 |
| P68431 | 42  | YBPGTVALBEIB | FALSE | TRUE | FALSE | 24.47 |
| P68431 | 43  | BPGTVALBEIBB | FALSE | TRUE | FALSE | 20.28 |
| P68431 | 44  | PGTVALBEIBBY | FALSE | TRUE | FALSE | 20.42 |
| P68431 | 45  | GVALBEIBBYQ  | FALSE | TRUE | FALSE | 33.67 |
| P68431 | 46  | TVALBEIBBYQK | FALSE | TRUE | FALSE | 42.5  |
| P68431 | 47  | VALBEIBBYQKS | FALSE | TRUE | FALSE | 43.13 |
| P68431 | 48  | ALBEIBBYQKST | FALSE | TRUE | FALSE | 44.04 |
| P68431 | 49  | LBEIBBYQKSTE | FALSE | TRUE | FALSE | 59    |
| P68431 | 50  | BEIBBYQKSTEL | FALSE | TRUE | FALSE | 60.04 |
| P68431 | 51  | EIBBYQKSTELL | FALSE | TRUE | FALSE | 30.33 |
| P68431 | 53  | BBYQKSTELLIB | FALSE | TRUE | FALSE | 15.98 |
| P68431 | 63  | IBKLPFQBLVBE | FALSE | TRUE | FALSE | 31.44 |
| P68431 | 64  | BKLPFQBLVBEI | FALSE | TRUE | FALSE | 18.69 |
| P68431 | 65  | KLPFQBLVBEIA | FALSE | TRUE | FALSE | 12.76 |
| P68431 | 66  | LPFQBLVBEIAQ | FALSE | TRUE | FALSE | 17.93 |
| P68431 | 67  | PFQBLVBEIAQD | FALSE | TRUE | FALSE | 14.35 |
| P68431 | 68  | FQBLVBEIAQDF | FALSE | TRUE | FALSE | 22.12 |
| P68431 | 69  | QBLVBEIAQDFK | FALSE | TRUE | FALSE | 20.95 |
| P68431 | 70  | BLVBEIAQDFKT | FALSE | TRUE | FALSE | 21.91 |
| P68431 | 73  | BEIAQDFKTDLB | FALSE | TRUE | FALSE | 11.89 |
| P68431 | 119 | TIMPKDIQLABB | FALSE | TRUE | FALSE | 16.23 |
| P68431 | 120 | IMPKDIQLABBI | FALSE | TRUE | FALSE | 14.81 |
| P68431 | 123 | KDIQLABBIBGE | FALSE | TRUE | FALSE | 25.78 |
| P68431 | 124 | DIQLABBIBGEB | FALSE | TRUE | FALSE | 20.91 |
| P68431 | 125 | IQLABBIBGEB  | FALSE | TRUE | FALSE | 24.4  |
| Q16695 | 40  | HBYBPGTVALBE | FALSE | TRUE | FALSE | 37.04 |
| Q16695 | 41  | BYBPGTVALBEI | FALSE | TRUE | FALSE | 26.82 |
| Q16695 | 42  | YBPGTVALBEIB | FALSE | TRUE | FALSE | 24.47 |
| Q16695 | 43  | BPGTVALBEIBB | FALSE | TRUE | FALSE | 20.28 |
| Q16695 | 44  | PGTVALBEIBBY | FALSE | TRUE | FALSE | 20.42 |

|        |     |              |       |      |       |       |
|--------|-----|--------------|-------|------|-------|-------|
| Q16695 | 45  | GTVALBEIBBYQ | FALSE | TRUE | FALSE | 33.67 |
| Q16695 | 46  | TVALBEIBBYQK | FALSE | TRUE | FALSE | 42.5  |
| Q16695 | 47  | VALBEIBBYQKS | FALSE | TRUE | FALSE | 43.13 |
| Q16695 | 48  | ALBEIBBYQKST | FALSE | TRUE | FALSE | 44.04 |
| Q16695 | 49  | LBEIBBYQKSTE | FALSE | TRUE | FALSE | 59    |
| Q16695 | 50  | BEIBBYQKSTEL | FALSE | TRUE | FALSE | 60.04 |
| Q16695 | 51  | EIBBYQKSTELL | FALSE | TRUE | FALSE | 30.33 |
| Q16695 | 53  | BBYQKSTELLIB | FALSE | TRUE | FALSE | 15.98 |
| Q16695 | 63  | IBKLPFQBLMBE | FALSE | TRUE | FALSE | 27.37 |
| Q16695 | 64  | BKLPFQBLMBEI | FALSE | TRUE | FALSE | 23.43 |
| Q16695 | 66  | LPFQBLMBEIAQ | FALSE | TRUE | FALSE | 12.94 |
| Q16695 | 68  | FQBLMBEIAQDF | FALSE | TRUE | FALSE | 16.98 |
| Q16695 | 69  | QBLMBEIAQDFK | FALSE | TRUE | FALSE | 18.13 |
| Q16695 | 70  | BLMBEIAQDFKT | FALSE | TRUE | FALSE | 15.82 |
| Q16695 | 71  | LMBEIAQDFKTD | FALSE | TRUE | FALSE | 14.94 |
| Q16695 | 73  | BEIAQDFKTDLB | FALSE | TRUE | FALSE | 11.89 |
| Q16695 | 119 | TIMPKDIQLABB | FALSE | TRUE | FALSE | 16.23 |
| Q16695 | 120 | IMPKDIQLABBI | FALSE | TRUE | FALSE | 14.81 |
| Q16695 | 123 | KDIQLABBIBGE | FALSE | TRUE | FALSE | 25.78 |
| Q16695 | 124 | DIQLABBIBGEB | FALSE | TRUE | FALSE | 20.91 |
| Q16695 | 125 | IQLABBIBGEB  | FALSE | TRUE | FALSE | 24.4  |
| Q71DI3 | 40  | HBYBPGTVALBE | FALSE | TRUE | FALSE | 37.04 |
| Q71DI3 | 41  | BYBPGTVALBEI | FALSE | TRUE | FALSE | 26.82 |
| Q71DI3 | 42  | YBPGTVALBEIB | FALSE | TRUE | FALSE | 24.47 |
| Q71DI3 | 43  | BPGTVALBEIBB | FALSE | TRUE | FALSE | 20.28 |
| Q71DI3 | 44  | PGTVALBEIBBY | FALSE | TRUE | FALSE | 20.42 |
| Q71DI3 | 45  | GTVALBEIBBYQ | FALSE | TRUE | FALSE | 33.67 |
| Q71DI3 | 46  | TVALBEIBBYQK | FALSE | TRUE | FALSE | 42.5  |
| Q71DI3 | 47  | VALBEIBBYQKS | FALSE | TRUE | FALSE | 43.13 |
| Q71DI3 | 48  | ALBEIBBYQKST | FALSE | TRUE | FALSE | 44.04 |
| Q71DI3 | 49  | LBEIBBYQKSTE | FALSE | TRUE | FALSE | 59    |
| Q71DI3 | 50  | BEIBBYQKSTEL | FALSE | TRUE | FALSE | 60.04 |
| Q71DI3 | 51  | EIBBYQKSTELL | FALSE | TRUE | FALSE | 30.33 |
| Q71DI3 | 53  | BBYQKSTELLIB | FALSE | TRUE | FALSE | 15.98 |
| Q71DI3 | 63  | IBKLPFQBLVBE | FALSE | TRUE | FALSE | 31.44 |
| Q71DI3 | 64  | BKLPFQBLVBEI | FALSE | TRUE | FALSE | 18.69 |
| Q71DI3 | 65  | KLPFQBLVBEIA | FALSE | TRUE | FALSE | 12.76 |
| Q71DI3 | 66  | LPFQBLVBEIAQ | FALSE | TRUE | FALSE | 17.93 |
| Q71DI3 | 67  | PFQBLVBEIAQD | FALSE | TRUE | FALSE | 14.35 |
| Q71DI3 | 68  | FQBLVBEIAQDF | FALSE | TRUE | FALSE | 22.12 |
| Q71DI3 | 69  | QBLVBEIAQDFK | FALSE | TRUE | FALSE | 20.95 |
| Q71DI3 | 70  | BLVBEIAQDFKT | FALSE | TRUE | FALSE | 21.91 |
| Q71DI3 | 73  | BEIAQDFKTDLB | FALSE | TRUE | FALSE | 11.89 |
| Q71DI3 | 119 | TIMPKDIQLABB | FALSE | TRUE | FALSE | 16.23 |
| Q71DI3 | 120 | IMPKDIQLABBI | FALSE | TRUE | FALSE | 14.81 |
| Q71DI3 | 123 | KDIQLABBIBGE | FALSE | TRUE | FALSE | 25.78 |
| Q71DI3 | 124 | DIQLABBIBGEB | FALSE | TRUE | FALSE | 20.91 |
| Q71DI3 | 125 | IQLABBIBGEB  | FALSE | TRUE | FALSE | 24.4  |
| P84243 | 39  | PHBYBPGTVALB | FALSE | TRUE | FALSE | 10.55 |
| P84243 | 40  | HBYBPGTVALBE | FALSE | TRUE | FALSE | 37.06 |
| P84243 | 40  | HBYBPGTVALBE | FALSE | TRUE | FALSE | 38.94 |
| P84243 | 41  | BYBPGTVALBEI | FALSE | TRUE | FALSE | 24.26 |

|        |     |              |       |      |       |       |
|--------|-----|--------------|-------|------|-------|-------|
| P84243 | 41  | BYBPGTVALBEI | FALSE | TRUE | FALSE | 24.72 |
| P84243 | 42  | YBPGTVALBEIB | FALSE | TRUE | FALSE | 24.46 |
| P84243 | 42  | YBPGTVALBEIB | FALSE | TRUE | FALSE | 24.84 |
| P84243 | 43  | BPGTVALBEIBB | FALSE | TRUE | FALSE | 20.71 |
| P84243 | 43  | BPGTVALBEIBB | FALSE | TRUE | FALSE | 20.91 |
| P84243 | 44  | PGTVALBEIBBY | FALSE | TRUE | FALSE | 22.84 |
| P84243 | 44  | PGTVALBEIBBY | FALSE | TRUE | FALSE | 24.99 |
| P84243 | 45  | GTVALBEIBBYQ | FALSE | TRUE | FALSE | 31.72 |
| P84243 | 45  | GTVALBEIBBYQ | FALSE | TRUE | FALSE | 31.75 |
| P84243 | 46  | TVALBEIBBYQK | FALSE | TRUE | FALSE | 44.24 |
| P84243 | 46  | TVALBEIBBYQK | FALSE | TRUE | FALSE | 45.4  |
| P84243 | 47  | VALBEIBBYQKS | FALSE | TRUE | FALSE | 45.41 |
| P84243 | 47  | VALBEIBBYQKS | FALSE | TRUE | FALSE | 46.73 |
| P84243 | 48  | ALBEIBBYQKST | FALSE | TRUE | FALSE | 43.91 |
| P84243 | 48  | ALBEIBBYQKST | FALSE | TRUE | FALSE | 45.02 |
| P84243 | 49  | LBEIBBYQKSTE | FALSE | TRUE | FALSE | 51.16 |
| P84243 | 49  | LBEIBBYQKSTE | FALSE | TRUE | FALSE | 53.79 |
| P84243 | 50  | BEIBBYQKSTEL | FALSE | TRUE | FALSE | 62.42 |
| P84243 | 50  | BEIBBYQKSTEL | FALSE | TRUE | FALSE | 64.56 |
| P84243 | 51  | EIBBYQKSTELL | FALSE | TRUE | FALSE | 32.56 |
| P84243 | 51  | EIBBYQKSTELL | FALSE | TRUE | FALSE | 29.8  |
| P84243 | 52  | IBBYQKSTELLI | FALSE | TRUE | FALSE | 11.54 |
| P84243 | 52  | IBBYQKSTELLI | FALSE | TRUE | FALSE | 11.56 |
| P84243 | 53  | BBYQKSTELLIB | FALSE | TRUE | FALSE | 15.3  |
| P84243 | 53  | BBYQKSTELLIB | FALSE | TRUE | FALSE | 15.14 |
| P84243 | 63  | IBKLPFQBLVBE | FALSE | TRUE | FALSE | 30.65 |
| P84243 | 63  | IBKLPFQBLVBE | FALSE | TRUE | FALSE | 30.58 |
| P84243 | 64  | BKLPFQBLVBEI | FALSE | TRUE | FALSE | 17.51 |
| P84243 | 64  | BKLPFQBLVBEI | FALSE | TRUE | FALSE | 19.58 |
| P84243 | 65  | KLPFQBLVBEIA | FALSE | TRUE | FALSE | 14.35 |
| P84243 | 65  | KLPFQBLVBEIA | FALSE | TRUE | FALSE | 10.86 |
| P84243 | 66  | LPFQBLVBEIAQ | FALSE | TRUE | FALSE | 17.89 |
| P84243 | 66  | LPFQBLVBEIAQ | FALSE | TRUE | FALSE | 14.39 |
| P84243 | 67  | PFQBLVBEIAQD | FALSE | TRUE | FALSE | 11.26 |
| P84243 | 67  | PFQBLVBEIAQD | FALSE | TRUE | FALSE | 12.02 |
| P84243 | 68  | FQBLVBEIAQDF | FALSE | TRUE | FALSE | 21.86 |
| P84243 | 68  | FQBLVBEIAQDF | FALSE | TRUE | FALSE | 19.27 |
| P84243 | 69  | QBLVBEIAQDFK | FALSE | TRUE | FALSE | 26.02 |
| P84243 | 69  | QBLVBEIAQDFK | FALSE | TRUE | FALSE | 27.6  |
| P84243 | 70  | BLVBEIAQDFKT | FALSE | TRUE | FALSE | 22.49 |
| P84243 | 70  | BLVBEIAQDFKT | FALSE | TRUE | FALSE | 16.7  |
| P84243 | 71  | LVBEIAQDFKTD | FALSE | TRUE | FALSE | 11.71 |
| P84243 | 73  | BEIAQDFKTDLB | FALSE | TRUE | FALSE | 10.5  |
| P84243 | 119 | TIMPKDIQLABB | FALSE | TRUE | FALSE | 16.81 |
| P84243 | 119 | TIMPKDIQLABB | FALSE | TRUE | FALSE | 15.79 |
| P84243 | 120 | IMPKDIQLABBI | FALSE | TRUE | FALSE | 15.47 |
| P84243 | 120 | IMPKDIQLABBI | FALSE | TRUE | FALSE | 15.37 |
| P84243 | 121 | MPKDIQLABBIB | FALSE | TRUE | FALSE | 10.67 |
| P84243 | 121 | MPKDIQLABBIB | FALSE | TRUE | FALSE | 11.44 |
| P84243 | 123 | KDIQLABBIBGE | FALSE | TRUE | FALSE | 26.86 |
| P84243 | 123 | KDIQLABBIBGE | FALSE | TRUE | FALSE | 27.31 |
| P84243 | 124 | DIQLABBIBGEB | FALSE | TRUE | FALSE | 18.45 |

|        |     |              |       |      |       |       |
|--------|-----|--------------|-------|------|-------|-------|
| P84243 | 124 | DIQLABBIBGEB | FALSE | TRUE | FALSE | 21.11 |
| P84243 | 125 | IQLABBIBGEBA | FALSE | TRUE | FALSE | 24.68 |
| P84243 | 125 | IQLABBIBGEBA | FALSE | TRUE | FALSE | 24.31 |
| Q6NXT2 | 39  | HBYBPGTVALBE | FALSE | TRUE | FALSE | 37.04 |
| Q6NXT2 | 40  | BYBPGTVALBEI | FALSE | TRUE | FALSE | 26.82 |
| Q6NXT2 | 41  | YBPGTVALBEIB | FALSE | TRUE | FALSE | 24.47 |
| Q6NXT2 | 42  | BPGTVALBEIBB | FALSE | TRUE | FALSE | 20.28 |
| Q6NXT2 | 43  | PGTVALBEIBBY | FALSE | TRUE | FALSE | 20.42 |
| Q6NXT2 | 44  | GTVALBEIBBYQ | FALSE | TRUE | FALSE | 33.67 |
| Q6NXT2 | 45  | TVALBEIBBYQK | FALSE | TRUE | FALSE | 42.5  |
| Q6NXT2 | 46  | VALBEIBBYQKS | FALSE | TRUE | FALSE | 43.13 |
| Q6NXT2 | 47  | ALBEIBBYQKST | FALSE | TRUE | FALSE | 44.04 |
| Q6NXT2 | 48  | LBEIBBYQKSTE | FALSE | TRUE | FALSE | 59    |
| Q6NXT2 | 49  | BEIBBYQKSTEL | FALSE | TRUE | FALSE | 60.04 |
| Q6NXT2 | 50  | EIBBYQKSTELL | FALSE | TRUE | FALSE | 30.33 |
| Q6NXT2 | 52  | BBYQKSTELLIB | FALSE | TRUE | FALSE | 15.98 |
| Q6NXT2 | 62  | IBKLPFQBLVBE | FALSE | TRUE | FALSE | 31.44 |
| Q6NXT2 | 63  | BKLPFQBLVBEI | FALSE | TRUE | FALSE | 18.69 |
| Q6NXT2 | 64  | KLPFQBLVBEIA | FALSE | TRUE | FALSE | 12.76 |
| Q6NXT2 | 65  | LPFQBLVBEIAQ | FALSE | TRUE | FALSE | 17.93 |
| Q6NXT2 | 66  | PFQBLVBEIAQD | FALSE | TRUE | FALSE | 14.35 |
| Q6NXT2 | 67  | FQBLVBEIAQDF | FALSE | TRUE | FALSE | 22.12 |
| Q6NXT2 | 68  | QBLVBEIAQDFN | FALSE | TRUE | FALSE | 22.02 |
| Q6NXT2 | 69  | BLVBEIAQDFNT | FALSE | TRUE | FALSE | 16.29 |
| Q6NXT2 | 70  | LVBEIAQDFNTD | FALSE | TRUE | FALSE | 14.39 |
| Q6NXT2 | 118 | TIMPKDIQLABB | FALSE | TRUE | FALSE | 16.23 |
| Q6NXT2 | 119 | IMPKDIQLABBI | FALSE | TRUE | FALSE | 14.81 |
| Q6NXT2 | 122 | KDIQLABBIBGE | FALSE | TRUE | FALSE | 25.78 |
| Q6NXT2 | 123 | DIQLABBIBGEB | FALSE | TRUE | FALSE | 20.91 |
| Q6NXT2 | 124 | IQLABBIBGEBA | FALSE | TRUE | FALSE | 24.4  |
| B2R4R0 | 18  | BHBKVLBDNIQG | FALSE | TRUE | FALSE | 10.45 |
| B2R4R0 | 19  | HBKVLBDNIQGI | FALSE | TRUE | FALSE | 20.53 |
| B2R4R0 | 19  | HBKVLBDNIQGI | FALSE | TRUE | FALSE | 24.97 |
| B2R4R0 | 23  | LBDNIQGITKPA | FALSE | TRUE | FALSE | 12.78 |
| B2R4R0 | 23  | LBDNIQGITKPA | FALSE | TRUE | FALSE | 10.2  |
| B2R4R0 | 26  | NIQGITKPAIBB | FALSE | TRUE | FALSE | 10.26 |
| B2R4R0 | 28  | QGITKPAIBBLA | FALSE | TRUE | FALSE | 11.33 |
| B2R4R0 | 28  | QGITKPAIBBLA | FALSE | TRUE | FALSE | 10.87 |
| B2R4R0 | 33  | PAIBBLABGGV  | FALSE | TRUE | FALSE | 14.23 |
| B2R4R0 | 33  | PAIBBLABGGV  | FALSE | TRUE | FALSE | 16.41 |
| B2R4R0 | 34  | AIBBLABGGVK  | FALSE | TRUE | FALSE | 39.68 |
| B2R4R0 | 34  | AIBBLABGGVK  | FALSE | TRUE | FALSE | 33.94 |
| B2R4R0 | 35  | IBBLABGGVKB  | FALSE | TRUE | FALSE | 35.64 |
| B2R4R0 | 35  | IBBLABGGVKB  | FALSE | TRUE | FALSE | 41.63 |
| B2R4R0 | 36  | BBLABGGVKBI  | FALSE | TRUE | FALSE | 38.07 |
| B2R4R0 | 36  | BBLABGGVKBI  | FALSE | TRUE | FALSE | 39.02 |
| B2R4R0 | 37  | BLABGGVKBIS  | FALSE | TRUE | FALSE | 50.48 |
| B2R4R0 | 37  | BLABGGVKBIS  | FALSE | TRUE | FALSE | 49.92 |
| B2R4R0 | 38  | LABGGVKBISG  | FALSE | TRUE | FALSE | 49.29 |
| B2R4R0 | 38  | LABGGVKBISG  | FALSE | TRUE | FALSE | 50.48 |
| B2R4R0 | 39  | ABGGVKBISGL  | FALSE | TRUE | FALSE | 30.98 |
| B2R4R0 | 39  | ABGGVKBISGL  | FALSE | TRUE | FALSE | 30.13 |

|        |    |              |       |      |       |       |
|--------|----|--------------|-------|------|-------|-------|
| B2R4R0 | 40 | BBGGVKBISGLI | FALSE | TRUE | FALSE | 24.49 |
| B2R4R0 | 40 | BBGGVKBISGLI | FALSE | TRUE | FALSE | 23.03 |
| B2R4R0 | 45 | KBISGLIYEETB | FALSE | TRUE | FALSE | 14.85 |
| B2R4R0 | 45 | KBISGLIYEETB | FALSE | TRUE | FALSE | 14.54 |
| B2R4R0 | 46 | BISGLIYEETBG | FALSE | TRUE | FALSE | 24.73 |
| B2R4R0 | 46 | BISGLIYEETBG | FALSE | TRUE | FALSE | 22.41 |
| B2R4R0 | 47 | ISGLIYEETBGV | FALSE | TRUE | FALSE | 21.06 |
| B2R4R0 | 47 | ISGLIYEETBGV | FALSE | TRUE | FALSE | 22.32 |
| B2R4R0 | 48 | SGLIYEETBGVL | FALSE | TRUE | FALSE | 23.98 |
| B2R4R0 | 48 | SGLIYEETBGVL | FALSE | TRUE | FALSE | 24.66 |
| B2R4R0 | 49 | GLIYEETBGVLK | FALSE | TRUE | FALSE | 27.79 |
| B2R4R0 | 49 | GLIYEETBGVLK | FALSE | TRUE | FALSE | 28.3  |
| B2R4R0 | 50 | LIYEETBGVLKV | FALSE | TRUE | FALSE | 32.98 |
| B2R4R0 | 50 | LIYEETBGVLKV | FALSE | TRUE | FALSE | 40.25 |
| B2R4R0 | 51 | IYEETBGVLKVF | FALSE | TRUE | FALSE | 15.9  |
| B2R4R0 | 51 | IYEETBGVLKVF | FALSE | TRUE | FALSE | 17.88 |
| B2R4R0 | 54 | ETBGVLKVFLN  | FALSE | TRUE | FALSE | 12.67 |
| B2R4R0 | 54 | ETBGVLKVFLN  | FALSE | TRUE | FALSE | 11.06 |
| B2R4R0 | 67 | IBDAVTYTEHAK | FALSE | TRUE | FALSE | 10.83 |
| B2R4R0 | 67 | IBDAVTYTEHAK | FALSE | TRUE | FALSE | 10.42 |
| B2R4R0 | 68 | BDAVTYTEHAKB | FALSE | TRUE | FALSE | 19.52 |
| B2R4R0 | 68 | BDAVTYTEHAKB | FALSE | TRUE | FALSE | 17.74 |
| B2R4R0 | 83 | TAMDVVYALKBQ | FALSE | TRUE | FALSE | 10.45 |
| B2R4R0 | 84 | AMDVVYALKBQG | FALSE | TRUE | FALSE | 15.24 |
| B2R4R0 | 84 | AMDVVYALKBQG | FALSE | TRUE | FALSE | 14.51 |
| B2R4R0 | 85 | MDVVYALKBQGB | FALSE | TRUE | FALSE | 23.02 |
| B2R4R0 | 85 | MDVVYALKBQGB | FALSE | TRUE | FALSE | 18.86 |
| B2R4R0 | 86 | DVVYALKBQGBT | FALSE | TRUE | FALSE | 14.52 |
| B2R4R0 | 86 | DVVYALKBQGBT | FALSE | TRUE | FALSE | 17.06 |
| B2R4R0 | 88 | VYALKBQGBTLY | FALSE | TRUE | FALSE | 10.67 |
| B2R4R0 | 89 | YALKBQGBTLYG | FALSE | TRUE | FALSE | 11.35 |
| B2R4R0 | 89 | YALKBQGBTLYG | FALSE | TRUE | FALSE | 10.05 |
| P62805 | 19 | HBKVLBDNIQGI | FALSE | TRUE | FALSE | 21.45 |
| P62805 | 22 | VLBDNIQGITKP | FALSE | TRUE | FALSE | 10.44 |
| P62805 | 23 | LBDNIQGITKPA | FALSE | TRUE | FALSE | 14.49 |
| P62805 | 28 | QGITKPAIBBLA | FALSE | TRUE | FALSE | 10.35 |
| P62805 | 33 | PAIBBLABBGGV | FALSE | TRUE | FALSE | 15.36 |
| P62805 | 34 | AIBBLABBGGVK | FALSE | TRUE | FALSE | 41.8  |
| P62805 | 35 | IBBLABBGGVKB | FALSE | TRUE | FALSE | 41.37 |
| P62805 | 36 | BBLABBGGVKBI | FALSE | TRUE | FALSE | 44.65 |
| P62805 | 37 | BLABBGGVKBIS | FALSE | TRUE | FALSE | 41.57 |
| P62805 | 38 | LABBGGVKBISG | FALSE | TRUE | FALSE | 41.3  |
| P62805 | 39 | ABBGGVKBISGL | FALSE | TRUE | FALSE | 39.28 |
| P62805 | 40 | BBGGVKBISGLI | FALSE | TRUE | FALSE | 25.19 |
| P62805 | 45 | KBISGLIYEETB | FALSE | TRUE | FALSE | 14.07 |
| P62805 | 46 | BISGLIYEETBG | FALSE | TRUE | FALSE | 22.82 |
| P62805 | 47 | ISGLIYEETBGV | FALSE | TRUE | FALSE | 19.26 |
| P62805 | 48 | SGLIYEETBGVL | FALSE | TRUE | FALSE | 26.8  |
| P62805 | 49 | GLIYEETBGVLK | FALSE | TRUE | FALSE | 28.78 |
| P62805 | 50 | LIYEETBGVLKV | FALSE | TRUE | FALSE | 36.96 |
| P62805 | 51 | IYEETBGVLKVF | FALSE | TRUE | FALSE | 14.41 |
| P62805 | 68 | BDAVTYTEHAKB | FALSE | TRUE | FALSE | 18.67 |

|        |     |              |       |      |       |       |
|--------|-----|--------------|-------|------|-------|-------|
| P62805 | 84  | AMDVVYALKBQG | FALSE | TRUE | FALSE | 14.06 |
| P62805 | 85  | MDVVYALKBQGB | FALSE | TRUE | FALSE | 20.45 |
| P62805 | 86  | DVVYALKBQGBT | FALSE | TRUE | FALSE | 13.01 |
| P62805 | 88  | VYALKBQGBTLY | FALSE | TRUE | FALSE | 11.08 |
| P62805 | 89  | YALKBQGBTLYG | FALSE | TRUE | FALSE | 15.82 |
| Q0VAS5 | 19  | HBKVLBDNIQGI | FALSE | TRUE | FALSE | 21.45 |
| Q0VAS5 | 22  | VLBDNIQGITKP | FALSE | TRUE | FALSE | 10.44 |
| Q0VAS5 | 23  | LBDNIQGITKPA | FALSE | TRUE | FALSE | 14.49 |
| Q0VAS5 | 28  | QGITKPAIBBLA | FALSE | TRUE | FALSE | 10.35 |
| Q0VAS5 | 33  | PAIBBLABBGGV | FALSE | TRUE | FALSE | 15.36 |
| Q0VAS5 | 34  | AIBBLABBGGVK | FALSE | TRUE | FALSE | 41.8  |
| Q0VAS5 | 35  | IBBLABBGGVKB | FALSE | TRUE | FALSE | 41.37 |
| Q0VAS5 | 36  | BBLABBGGVKBI | FALSE | TRUE | FALSE | 44.65 |
| Q0VAS5 | 37  | BLABBGGVKBIS | FALSE | TRUE | FALSE | 41.57 |
| Q0VAS5 | 38  | LABBGGVKBISG | FALSE | TRUE | FALSE | 41.3  |
| Q0VAS5 | 39  | ABBGGVKBISGL | FALSE | TRUE | FALSE | 39.28 |
| Q0VAS5 | 40  | BBGGVKBISGLI | FALSE | TRUE | FALSE | 25.19 |
| Q0VAS5 | 45  | KBISGLIYEETB | FALSE | TRUE | FALSE | 14.07 |
| Q0VAS5 | 46  | BISGLIYEETBG | FALSE | TRUE | FALSE | 22.82 |
| Q0VAS5 | 47  | ISGLIYEETBGV | FALSE | TRUE | FALSE | 19.26 |
| Q0VAS5 | 48  | SGLIYEETBGVL | FALSE | TRUE | FALSE | 26.8  |
| Q0VAS5 | 49  | GLIYEETBGVLK | FALSE | TRUE | FALSE | 28.78 |
| Q0VAS5 | 50  | LIYEETBGVLKV | FALSE | TRUE | FALSE | 36.96 |
| Q0VAS5 | 51  | IYEETBGVLKVF | FALSE | TRUE | FALSE | 14.41 |
| Q0VAS5 | 84  | AMDVVYALKBQG | FALSE | TRUE | FALSE | 14.06 |
| Q0VAS5 | 85  | MDVVYALKBQGB | FALSE | TRUE | FALSE | 20.45 |
| Q0VAS5 | 86  | DVVYALKBQGBT | FALSE | TRUE | FALSE | 13.01 |
| Q0VAS5 | 88  | VYALKBQGBTLY | FALSE | TRUE | FALSE | 11.08 |
| Q0VAS5 | 89  | YALKBQGBTLYG | FALSE | TRUE | FALSE | 15.82 |
| Q6B823 | 2   | PAIBBLABBGGV | FALSE | TRUE | FALSE | 15.36 |
| Q6B823 | 3   | AIBBLABBGGVK | FALSE | TRUE | FALSE | 41.8  |
| Q6B823 | 4   | IBBLABBGGVKB | FALSE | TRUE | FALSE | 41.37 |
| Q6B823 | 5   | BBLABBGGVKBI | FALSE | TRUE | FALSE | 44.65 |
| Q6B823 | 6   | BLABBGGVKBIS | FALSE | TRUE | FALSE | 41.57 |
| Q6B823 | 7   | LABBGGVKBISG | FALSE | TRUE | FALSE | 41.3  |
| Q6B823 | 8   | ABBGGVKBISGL | FALSE | TRUE | FALSE | 39.28 |
| Q6B823 | 9   | BBGGVKBISGLI | FALSE | TRUE | FALSE | 25.19 |
| Q6B823 | 14  | KBISGLIYEETB | FALSE | TRUE | FALSE | 14.07 |
| Q6B823 | 15  | BISGLIYEETBG | FALSE | TRUE | FALSE | 22.82 |
| Q6B823 | 16  | ISGLIYEETBGV | FALSE | TRUE | FALSE | 19.26 |
| Q6B823 | 17  | SGLIYEETBGVL | FALSE | TRUE | FALSE | 26.8  |
| Q6B823 | 18  | GLIYEETBGVLK | FALSE | TRUE | FALSE | 28.78 |
| Q6B823 | 19  | LIYEETBGVLKV | FALSE | TRUE | FALSE | 36.96 |
| Q6B823 | 20  | IYEETBGVLKVF | FALSE | TRUE | FALSE | 14.41 |
| Q14520 | 111 | VQNTCKDNPCGB | FALSE | TRUE | FALSE | 14.86 |
| Q14520 | 112 | QNTCKDNPCGBG | FALSE | TRUE | FALSE | 14.45 |
| Q14520 | 113 | NTCKDNPCGBGQ | FALSE | TRUE | FALSE | 19.43 |
| Q14520 | 114 | TCKDNPCGBGQC | FALSE | TRUE | FALSE | 18.52 |
| Q14520 | 115 | CKDNPCGBGQCL | FALSE | TRUE | FALSE | 20.77 |
| Q14520 | 116 | KDNPCGBGQCLI | FALSE | TRUE | FALSE | 22.11 |
| Q14520 | 117 | DNPCGBGQCLIT | FALSE | TRUE | FALSE | 20.17 |
| Q14520 | 118 | NPCGBGQCLITQ | FALSE | TRUE | FALSE | 22.07 |

|        |     |               |       |      |       |       |
|--------|-----|---------------|-------|------|-------|-------|
| Q14520 | 119 | PCGBGQCLITQS  | FALSE | TRUE | FALSE | 23.46 |
| Q14520 | 120 | CGBGQCLITQSP  | FALSE | TRUE | FALSE | 27.96 |
| Q14520 | 121 | GBGQCLITQSPP  | FALSE | TRUE | FALSE | 22.26 |
| Q14520 | 122 | BGQCLITQSPPY  | FALSE | TRUE | FALSE | 12.72 |
| Q14520 | 124 | QLITQSPPYYB   | FALSE | TRUE | FALSE | 10.02 |
| Q14520 | 157 | NPCQNGATCSBH  | FALSE | TRUE | FALSE | 11.22 |
| Q14520 | 159 | CQNGATCSBHKB  | FALSE | TRUE | FALSE | 23.38 |
| Q14520 | 160 | QNGATCSBHKBB  | FALSE | TRUE | FALSE | 24.42 |
| Q14520 | 161 | NGATCSBHKBBS  | FALSE | TRUE | FALSE | 19.86 |
| Q14520 | 193 | DCYVGDGYSYBG  | FALSE | TRUE | FALSE | 15.49 |
| Q14520 | 194 | CYVGDGYSYBGK  | FALSE | TRUE | FALSE | 15.91 |
| Q14520 | 195 | YVGDGYSYBGKM  | FALSE | TRUE | FALSE | 15.58 |
| Q14520 | 196 | VGDGYSYBGKMN  | FALSE | TRUE | FALSE | 17.63 |
| Q14520 | 197 | GDGYSYBGKMNB  | FALSE | TRUE | FALSE | 24.88 |
| Q14520 | 198 | DGYSYBGKMNB   | FALSE | TRUE | FALSE | 26.87 |
| Q14520 | 199 | GYSYBGKMNBTV  | FALSE | TRUE | FALSE | 14.12 |
| Q14520 | 201 | SYBGKMNBTVNQ  | FALSE | TRUE | FALSE | 11.15 |
| Q14520 | 358 | LTAAHCTDIKTB  | FALSE | TRUE | FALSE | 19.82 |
| Q14520 | 359 | TAAHCTDIKTBH  | FALSE | TRUE | FALSE | 21.28 |
| Q14520 | 366 | IKTBHLKVVLGD  | FALSE | TRUE | FALSE | 11.69 |
| Q14520 | 451 | GWGVTETGKGSB  | FALSE | TRUE | FALSE | 11.58 |
| Q14520 | 452 | WGVVTETGKGSBQ | FALSE | TRUE | FALSE | 19.21 |
| Q14520 | 453 | GVTETGKGSBQL  | FALSE | TRUE | FALSE | 11.36 |
| Q14520 | 454 | VTETGKGSBQLL  | FALSE | TRUE | FALSE | 18.41 |
| Q14520 | 455 | TETGKGSBQLLD  | FALSE | TRUE | FALSE | 12.79 |
| Q14520 | 456 | ETGKGSBQLLDA  | FALSE | TRUE | FALSE | 12.86 |
| Q14520 | 475 | TLCNSBQLYDHM  | FALSE | TRUE | FALSE | 10.34 |
| Q14520 | 476 | LCNSBQLYDHMI  | FALSE | TRUE | FALSE | 13.8  |
| Q14520 | 477 | CNSBQLYDHMID  | FALSE | TRUE | FALSE | 14.89 |
| Q14520 | 478 | NSBQLYDHMIDD  | FALSE | TRUE | FALSE | 12.25 |
| Q14520 | 479 | SBQLYDHMIDDS  | FALSE | TRUE | FALSE | 22.37 |
| P01876 | 40  | TWSESGQGVTAB  | FALSE | TRUE | FALSE | 16.42 |
| P01876 | 41  | WSESGQGVTABN  | FALSE | TRUE | FALSE | 21.18 |
| P01876 | 42  | SESGQGVTABNF  | FALSE | TRUE | FALSE | 19.7  |
| P01876 | 43  | ESGQGVTABNFP  | FALSE | TRUE | FALSE | 16.66 |
| P01876 | 44  | SGQGVTABNFPP  | FALSE | TRUE | FALSE | 23.61 |
| P01876 | 45  | GQGVTABNFPPS  | FALSE | TRUE | FALSE | 24.21 |
| P01876 | 46  | QGVTABNFPPSQ  | FALSE | TRUE | FALSE | 30.54 |
| P01876 | 47  | GVTABNFPPSQD  | FALSE | TRUE | FALSE | 12.92 |
| P01876 | 48  | VTABNFPPSQDA  | FALSE | TRUE | FALSE | 20.18 |
| P01876 | 49  | TABNFPPSQDAS  | FALSE | TRUE | FALSE | 10.39 |
| P01876 | 50  | ABNFPPSQDASG  | FALSE | TRUE | FALSE | 10.15 |
| P01876 | 248 | LTCLABGFSPKD  | FALSE | TRUE | FALSE | 17.84 |
| P01876 | 249 | TCLABGFSPKDV  | FALSE | TRUE | FALSE | 27.98 |
| P01876 | 250 | CLABGFSPKDV   | FALSE | TRUE | FALSE | 27.64 |
| P01876 | 251 | LABGFSPKDV    | FALSE | TRUE | FALSE | 28.69 |
| P01876 | 252 | ABGFSPKDV     | FALSE | TRUE | FALSE | 15.99 |
| P01876 | 262 | VBWLQGSQELPB  | FALSE | TRUE | FALSE | 13.33 |
| P01876 | 263 | BWLQGSQELPBE  | FALSE | TRUE | FALSE | 13.24 |
| P01876 | 271 | LPBEKYLTVASB  | FALSE | TRUE | FALSE | 17.68 |
| P01876 | 272 | PBEKYLTVASBQ  | FALSE | TRUE | FALSE | 29.37 |
| P01876 | 273 | BEKYLTVASBQE  | FALSE | TRUE | FALSE | 40.2  |

|        |     |               |       |      |       |       |
|--------|-----|---------------|-------|------|-------|-------|
| P01876 | 274 | EKYLTWASBQEP  | FALSE | TRUE | FALSE | 19.78 |
| P01876 | 275 | KYLTWASBQEPS  | FALSE | TRUE | FALSE | 33.49 |
| P01876 | 276 | YLTWASBQEPSQ  | FALSE | TRUE | FALSE | 29.43 |
| P01876 | 277 | LTWASBQEPSQG  | FALSE | TRUE | FALSE | 25.92 |
| P01876 | 278 | TWASBQEPSQGT  | FALSE | TRUE | FALSE | 54.16 |
| P01876 | 279 | WASBQEPSQGTT  | FALSE | TRUE | FALSE | 55.66 |
| P01876 | 280 | ASBQEPSQGTTT  | FALSE | TRUE | FALSE | 24.58 |
| P01876 | 281 | SBQEPSQGTTTF  | FALSE | TRUE | FALSE | 14.9  |
| P01876 | 330 | DBLAGKPTHVNV  | FALSE | TRUE | FALSE | 10.09 |
| P01877 | 40  | TWSESGQNVTAB  | FALSE | TRUE | FALSE | 14.8  |
| P01877 | 41  | WSESGQNVTABN  | FALSE | TRUE | FALSE | 10.74 |
| P01877 | 43  | ESGQNVTABNFP  | FALSE | TRUE | FALSE | 11.08 |
| P01877 | 44  | SGQNVTABNFPP  | FALSE | TRUE | FALSE | 17.92 |
| P01877 | 45  | GQNVTABNFPPS  | FALSE | TRUE | FALSE | 17.18 |
| P01877 | 46  | QNVTABNFPPSQ  | FALSE | TRUE | FALSE | 30.66 |
| P01877 | 47  | NVTABNFPPSQD  | FALSE | TRUE | FALSE | 17.55 |
| P01877 | 48  | VTABNFPPSQDA  | FALSE | TRUE | FALSE | 20.18 |
| P01877 | 49  | TABNFPPSQDAS  | FALSE | TRUE | FALSE | 10.39 |
| P01877 | 50  | ABNFPPSQDASG  | FALSE | TRUE | FALSE | 10.15 |
| P01877 | 235 | LTCLABGFSPKD  | FALSE | TRUE | FALSE | 17.84 |
| P01877 | 236 | TCLABGFSPKDV  | FALSE | TRUE | FALSE | 27.98 |
| P01877 | 237 | CLABGFSPKDLV  | FALSE | TRUE | FALSE | 27.64 |
| P01877 | 238 | LABGFSPKDLV   | FALSE | TRUE | FALSE | 28.69 |
| P01877 | 239 | ABGFSPKDLVVB  | FALSE | TRUE | FALSE | 15.99 |
| P01877 | 249 | VBWLQGSQELPB  | FALSE | TRUE | FALSE | 13.33 |
| P01877 | 250 | BWLQGSQELPBE  | FALSE | TRUE | FALSE | 13.24 |
| P01877 | 258 | LPBEKYLTWASB  | FALSE | TRUE | FALSE | 17.68 |
| P01877 | 259 | PBEKYLTWASBQ  | FALSE | TRUE | FALSE | 29.37 |
| P01877 | 260 | BEKYLTWASBQE  | FALSE | TRUE | FALSE | 40.2  |
| P01877 | 261 | EKYLTWASBQEP  | FALSE | TRUE | FALSE | 19.78 |
| P01877 | 262 | KYLTWASBQEPS  | FALSE | TRUE | FALSE | 33.49 |
| P01877 | 263 | YLTWASBQEPSQ  | FALSE | TRUE | FALSE | 29.43 |
| P01877 | 264 | LTWASBQEPSQG  | FALSE | TRUE | FALSE | 25.92 |
| P01877 | 265 | TWASBQEPSQGT  | FALSE | TRUE | FALSE | 54.16 |
| P01877 | 266 | WASBQEPSQGTT  | FALSE | TRUE | FALSE | 55.66 |
| P01877 | 267 | ASBQEPSQGTTT  | FALSE | TRUE | FALSE | 24.58 |
| P01877 | 268 | SBQEPSQGTTTF  | FALSE | TRUE | FALSE | 14.9  |
| P01877 | 315 | TIDBMAGKPTHV  | FALSE | TRUE | FALSE | 11.99 |
| P01877 | 316 | IDBMAGKPTHVN  | FALSE | TRUE | FALSE | 12.27 |
| P01880 | 41  | TWYMGTSQSQPB  | FALSE | TRUE | FALSE | 11.53 |
| P01880 | 48  | SQPQBTTFPEIQB | FALSE | TRUE | FALSE | 11.46 |
| P01880 | 49  | QPQBTTFPEIQBB | FALSE | TRUE | FALSE | 25.45 |
| P01880 | 50  | PQBTTFPEIQBBB | FALSE | TRUE | FALSE | 17.02 |
| P01880 | 51  | QBTTFPEIQBBDS | FALSE | TRUE | FALSE | 27.89 |
| P01880 | 52  | BTFPEIQBBDSY  | FALSE | TRUE | FALSE | 30.16 |
| P01880 | 53  | TFPEIQBBDSYY  | FALSE | TRUE | FALSE | 19.13 |
| P01880 | 54  | FPEIQBBDSYYM  | FALSE | TRUE | FALSE | 20.14 |
| P01880 | 56  | EIQBBDSYYMTS  | FALSE | TRUE | FALSE | 21.45 |
| P01880 | 57  | IQBBDSYYMTSS  | FALSE | TRUE | FALSE | 36.34 |
| P01880 | 58  | QBBDSYYMTSSQ  | FALSE | TRUE | FALSE | 34.82 |
| P01880 | 59  | BBDSSYYMTSSQL | FALSE | TRUE | FALSE | 11.82 |
| P01880 | 68  | SQLSTPLQQWBQ  | FALSE | TRUE | FALSE | 11.36 |



|        |     |               |       |      |       |       |
|--------|-----|---------------|-------|------|-------|-------|
| P01880 | 69  | QLSTPLQQWBQG  | FALSE | TRUE | FALSE | 10.35 |
| P01880 | 70  | LSTPLQQWBQGE  | FALSE | TRUE | FALSE | 12.65 |
| P01880 | 71  | STPLQQWBQGEY  | FALSE | TRUE | FALSE | 14.01 |
| P01880 | 72  | TPLQQWBQGEYK  | FALSE | TRUE | FALSE | 30.56 |
| P01880 | 73  | PLQQWBQGEYKC  | FALSE | TRUE | FALSE | 15.47 |
| P01880 | 74  | LQQWBQGEYKCV  | FALSE | TRUE | FALSE | 26.83 |
| P01880 | 75  | QQWBQGEYKCVV  | FALSE | TRUE | FALSE | 23.23 |
| P01880 | 76  | QWBQGEYKCVVQ  | FALSE | TRUE | FALSE | 25.7  |
| P01880 | 77  | WBQGEYKCVVQH  | FALSE | TRUE | FALSE | 15.76 |
| P01880 | 78  | BQGEYKCVVQHT  | FALSE | TRUE | FALSE | 10.4  |
| P01880 | 126 | TTAPATTBNTGB  | FALSE | TRUE | FALSE | 20.55 |
| P01880 | 127 | TAPATTBNTGBG  | FALSE | TRUE | FALSE | 27.24 |
| P01880 | 128 | APATTBNTGBGG  | FALSE | TRUE | FALSE | 17.46 |
| P01880 | 129 | PATTBNTGBGGE  | FALSE | TRUE | FALSE | 25.2  |
| P01880 | 130 | ATTBNTGBGGEE  | FALSE | TRUE | FALSE | 31.66 |
| P01880 | 131 | TTBNTGBGGEEK  | FALSE | TRUE | FALSE | 39.66 |
| P01880 | 132 | TBNTGBGGEEKK  | FALSE | TRUE | FALSE | 45.48 |
| P01880 | 134 | NTGBGGEEKKKE  | FALSE | TRUE | FALSE | 20.9  |
| P01880 | 217 | EGLLEBHSNGSQ  | FALSE | TRUE | FALSE | 10.68 |
| P01880 | 218 | GLLEBHSNGSQS  | FALSE | TRUE | FALSE | 20.44 |
| P01880 | 219 | LLEBHSNGSQSQ  | FALSE | TRUE | FALSE | 12.16 |
| P01880 | 220 | LEBHSNGSQSQH  | FALSE | TRUE | FALSE | 10.19 |
| P01880 | 221 | EBHSNGSQSQHS  | FALSE | TRUE | FALSE | 11.75 |
| P01880 | 222 | BHSNGSQSQHSB  | FALSE | TRUE | FALSE | 10.99 |
| P01880 | 224 | SNGSQSQHSBLT  | FALSE | TRUE | FALSE | 10.73 |
| P01880 | 227 | SQSQHSBLTLPB  | FALSE | TRUE | FALSE | 17.56 |
| P01880 | 228 | QSQHSBLTLPBS  | FALSE | TRUE | FALSE | 26.66 |
| P01880 | 229 | SQHSBLTLPBSL  | FALSE | TRUE | FALSE | 10.6  |
| P01880 | 232 | SBLTLPBSLWNA  | FALSE | TRUE | FALSE | 11.87 |
| P01880 | 249 | CTLNHPSLPPQB  | FALSE | TRUE | FALSE | 12.25 |
| P01880 | 255 | SLPPQBLMALBE  | FALSE | TRUE | FALSE | 10.49 |
| P01880 | 256 | LPPQBLMALBEP  | FALSE | TRUE | FALSE | 12.09 |
| P01880 | 257 | PPQBLMALBEP   | FALSE | TRUE | FALSE | 11.45 |
| P01880 | 259 | QBLMALBEPAAQ  | FALSE | TRUE | FALSE | 23.94 |
| P01880 | 263 | ALBEPAAQAPVK  | FALSE | TRUE | FALSE | 13.16 |
| P01880 | 264 | LBEPAAQAPVKL  | FALSE | TRUE | FALSE | 11.26 |
| P01880 | 313 | BEVNTSGFAPAB  | FALSE | TRUE | FALSE | 22    |
| P01880 | 359 | HEDSBTLLNASB  | FALSE | TRUE | FALSE | 17.27 |
| P01880 | 360 | EDSBTLLNASBS  | FALSE | TRUE | FALSE | 18.53 |
| P01880 | 361 | DSBTLLNASBSL  | FALSE | TRUE | FALSE | 26.25 |
| P01880 | 362 | SBTLLNASBSLE  | FALSE | TRUE | FALSE | 21.87 |
| P01880 | 363 | BTLLNASBSLEV  | FALSE | TRUE | FALSE | 15.84 |
| P01854 | 2   | STQSPSVFPLTB  | FALSE | TRUE | FALSE | 13.71 |
| P01854 | 212 | SNPBGVSAYLSB  | FALSE | TRUE | FALSE | 24.62 |
| P01854 | 213 | NPBGVSAYLSBP  | FALSE | TRUE | FALSE | 13.49 |
| P01854 | 214 | PBGVSAYLSBPS  | FALSE | TRUE | FALSE | 12.78 |
| P01854 | 215 | BGV SAYLSBPSP | FALSE | TRUE | FALSE | 12.68 |
| P01854 | 249 | GTVNLTWSBASG  | FALSE | TRUE | FALSE | 11.83 |
| P01854 | 250 | TVNLTWSBASGK  | FALSE | TRUE | FALSE | 11.34 |
| P01854 | 251 | VNLTWSBASGKP  | FALSE | TRUE | FALSE | 20.34 |
| P01854 | 252 | NLTWSBASGKPV  | FALSE | TRUE | FALSE | 20.45 |
| P01854 | 253 | LTWSBASGKPVN  | FALSE | TRUE | FALSE | 19.17 |

|        |     |              |       |      |       |       |
|--------|-----|--------------|-------|------|-------|-------|
| P01854 | 254 | TWSBASGKPVNH | FALSE | TRUE | FALSE | 29.03 |
| P01854 | 255 | WSBASGKPVNHS | FALSE | TRUE | FALSE | 18.79 |
| P01854 | 256 | SBASGKPVNHST | FALSE | TRUE | FALSE | 14.14 |
| P01854 | 263 | VNHSTBKEEKQB | FALSE | TRUE | FALSE | 11.34 |
| P01854 | 265 | HSTBKEEKQBNG | FALSE | TRUE | FALSE | 18.93 |
| P01854 | 266 | STBKEEKQBNGT | FALSE | TRUE | FALSE | 20.42 |
| P01854 | 267 | TBKEEKQBNGTL | FALSE | TRUE | FALSE | 18.58 |
| P01854 | 297 | YQCBVTHPHLPB | FALSE | TRUE | FALSE | 21.47 |
| P01854 | 298 | QCBVTHPHLPBA | FALSE | TRUE | FALSE | 16.05 |
| P01854 | 299 | CBVTHPHLPBAL | FALSE | TRUE | FALSE | 15.72 |
| P01854 | 303 | HPHLPBALMBST | FALSE | TRUE | FALSE | 15.06 |
| P01854 | 306 | LPBALMBSTTKT | FALSE | TRUE | FALSE | 12.89 |
| P01854 | 307 | PBALMBSTTKTS | FALSE | TRUE | FALSE | 11.65 |
| P01854 | 310 | LMBSTTKTSGPB | FALSE | TRUE | FALSE | 15.02 |
| P01854 | 311 | MBSTTKTSGPBA | FALSE | TRUE | FALSE | 21.57 |
| P01854 | 330 | ATPEWPGSBDKB | FALSE | TRUE | FALSE | 13.24 |
| P01854 | 331 | TPEWPGSBDKBT | FALSE | TRUE | FALSE | 14.75 |
| P01854 | 332 | PEWPGSBDKBT  | FALSE | TRUE | FALSE | 14.97 |
| P01854 | 333 | EWPGSBDKBT   | FALSE | TRUE | FALSE | 26.82 |
| P01854 | 334 | WPGSBDKBT    | FALSE | TRUE | FALSE | 15.87 |
| P01854 | 364 | VQLPDABHSTTQ | FALSE | TRUE | FALSE | 12.57 |
| P01854 | 365 | QLPDABHSTTQP | FALSE | TRUE | FALSE | 17.67 |
| P01854 | 366 | LPDABHSTTQPB | FALSE | TRUE | FALSE | 25.73 |
| P01854 | 367 | PDABHSTTQPBK | FALSE | TRUE | FALSE | 11.27 |
| P01854 | 368 | DABHSTTQPBKT | FALSE | TRUE | FALSE | 22.04 |
| P01854 | 385 | FVFSBLEVTBAE | FALSE | TRUE | FALSE | 10.11 |
| P01854 | 386 | VFSBLEVTBAEW | FALSE | TRUE | FALSE | 14.45 |
| P01854 | 387 | FSBLEVTBAEWE | FALSE | TRUE | FALSE | 21.99 |
| P01854 | 388 | SBLEVTBAEWEQ | FALSE | TRUE | FALSE | 15.45 |
| P01854 | 389 | BLEVTBAEWEQK | FALSE | TRUE | FALSE | 14.7  |
| P01854 | 399 | QKDEFICBAVHE | FALSE | TRUE | FALSE | 10.98 |
| P01854 | 415 | SQTVQBAVSVNP | FALSE | TRUE | FALSE | 10.93 |
| P01854 | 416 | QTVQBAVSVNPG | FALSE | TRUE | FALSE | 10.69 |
| P01857 | 172 | TKPBEEQYNSTY | FALSE | TRUE | FALSE | 10.18 |
| P01857 | 173 | KPBEEQYNSTYB | FALSE | TRUE | FALSE | 23.98 |
| P01857 | 227 | BEPQVYTLPPSB | FALSE | TRUE | FALSE | 16.5  |
| P01857 | 234 | LPPSBDELTKNQ | FALSE | TRUE | FALSE | 11.79 |
| P01857 | 237 | SBDELTKNQVSL | FALSE | TRUE | FALSE | 13.2  |
| P01859 | 8   | VFPLAPCSBSTS | FALSE | TRUE | FALSE | 11.88 |
| P01859 | 169 | KPBEEQFNSTFB | FALSE | TRUE | FALSE | 20.32 |
| P01859 | 223 | BEPQVYTLPPSB | FALSE | TRUE | FALSE | 16.5  |
| P01859 | 224 | EPQVYTLPPSBE | FALSE | TRUE | FALSE | 13.13 |
| P01860 | 8   | VFPLAPCSBSTS | FALSE | TRUE | FALSE | 11.88 |
| P01860 | 9   | FPLAPCSBSTSG | FALSE | TRUE | FALSE | 11.95 |
| P01860 | 11  | LAPCSBSTSGGT | FALSE | TRUE | FALSE | 10.58 |
| P01860 | 219 | TKPBEEQYNSTF | FALSE | TRUE | FALSE | 10.31 |
| P01860 | 220 | KPBEEQYNSTFB | FALSE | TRUE | FALSE | 24.46 |
| P01860 | 274 | BEPQVYTLPPSB | FALSE | TRUE | FALSE | 16.5  |
| P01860 | 275 | EPQVYTLPPSBE | FALSE | TRUE | FALSE | 13.13 |
| P01860 | 359 | HEALHNBFTQKS | FALSE | TRUE | FALSE | 10.41 |
| P01860 | 360 | EALHNBFTQKSL | FALSE | TRUE | FALSE | 14.4  |
| P01861 | 8   | VFPLAPCSBSTS | FALSE | TRUE | FALSE | 11.88 |

|        |     |              |       |      |       |       |
|--------|-----|--------------|-------|------|-------|-------|
| P01861 | 170 | KPBEEQFNSTYB | FALSE | TRUE | FALSE | 21.13 |
| P01861 | 285 | FLYSBLTVDKSB | FALSE | TRUE | FALSE | 24.82 |
| P01861 | 286 | LYSBLTVDKSBW | FALSE | TRUE | FALSE | 15.93 |
| P01861 | 287 | YSBLTVDKSBWQ | FALSE | TRUE | FALSE | 19.11 |
| P01861 | 288 | SBLTVDKSBWQE | FALSE | TRUE | FALSE | 17.85 |
| P01861 | 289 | BLTVDKSBWQEG | FALSE | TRUE | FALSE | 13.28 |
| P01861 | 291 | TVDKSBWQEGNV | FALSE | TRUE | FALSE | 12.43 |
| P01861 | 292 | VDKSBWQEGNVF | FALSE | TRUE | FALSE | 11.21 |
| P01861 | 293 | DKSBWQEGNVFS | FALSE | TRUE | FALSE | 10.57 |
| P01834 | 24  | VVCLLNNFYPBE | FALSE | TRUE | FALSE | 17.02 |
| P01834 | 25  | VCLLNNFYPBEA | FALSE | TRUE | FALSE | 10.7  |
| P01834 | 26  | CLLNNFYPBEAK | FALSE | TRUE | FALSE | 15.6  |
| P01834 | 27  | LLNNFYPBEAKV | FALSE | TRUE | FALSE | 19.68 |
| P01834 | 28  | LNNFYPBEAKVQ | FALSE | TRUE | FALSE | 35.88 |
| P01834 | 29  | NNFYPBEAKVQW | FALSE | TRUE | FALSE | 15.35 |
| P01834 | 32  | YPBEAKVQWKVD | FALSE | TRUE | FALSE | 13.09 |
| P01834 | 34  | BEAKVQWKVDNA | FALSE | TRUE | FALSE | 14.51 |
| P01834 | 94  | SSPVTKSFNBGE | FALSE | TRUE | FALSE | 15.1  |
| P01834 | 95  | SPVTKSFNBGEC | FALSE | TRUE | FALSE | 12    |
| A0M8Q6 | 82  | HBSYSCBVTHEG | FALSE | TRUE | FALSE | 10.24 |
| A0M8Q6 | 83  | BSYSCBVTHEGS | FALSE | TRUE | FALSE | 14.24 |
| A0M8Q6 | 84  | SYSCBVTHEGST | FALSE | TRUE | FALSE | 11.36 |
| A0M8Q6 | 85  | YSCBVTHEGSTV | FALSE | TRUE | FALSE | 11.65 |
| P01871 | 44  | YKNNSDISSTBG | FALSE | TRUE | FALSE | 17.54 |
| P01871 | 45  | KNNSDISSTBGF | FALSE | TRUE | FALSE | 16.82 |
| P01871 | 46  | NNSDISSTBGFP | FALSE | TRUE | FALSE | 24.24 |
| P01871 | 47  | NSDISSTBGFPS | FALSE | TRUE | FALSE | 22.42 |
| P01871 | 48  | SDISSTBGFPSV | FALSE | TRUE | FALSE | 24.53 |
| P01871 | 49  | DISSTBGFPSVL | FALSE | TRUE | FALSE | 20.02 |
| P01871 | 50  | ISSTBGFPSVLB | FALSE | TRUE | FALSE | 19.66 |
| P01871 | 51  | SSTBGFPSVLBG | FALSE | TRUE | FALSE | 21.63 |
| P01871 | 52  | STBGFPSVLBGG | FALSE | TRUE | FALSE | 11.74 |
| P01871 | 53  | TBGFPSVLBGGK | FALSE | TRUE | FALSE | 12.35 |
| P01871 | 58  | SVLBGGKYAATS | FALSE | TRUE | FALSE | 16.18 |
| P01871 | 59  | VLBGGKYAATSQ | FALSE | TRUE | FALSE | 12.94 |
| P01871 | 60  | LBGGKYAATSQV | FALSE | TRUE | FALSE | 10.66 |
| P01871 | 117 | VPPBDGFFGNPB | FALSE | TRUE | FALSE | 11.22 |
| P01871 | 131 | KLICQATGFSPB | FALSE | TRUE | FALSE | 13.7  |
| P01871 | 132 | LICQATGFSPBQ | FALSE | TRUE | FALSE | 20.38 |
| P01871 | 133 | ICQATGFSPBQI | FALSE | TRUE | FALSE | 50.74 |
| P01871 | 134 | CQATGFSPBQIQ | FALSE | TRUE | FALSE | 38.63 |
| P01871 | 135 | QATGFSPBQIQV | FALSE | TRUE | FALSE | 52.8  |
| P01871 | 136 | ATGFSPBQIQVS | FALSE | TRUE | FALSE | 27.06 |
| P01871 | 137 | TGFSPBQIQVSW | FALSE | TRUE | FALSE | 17.59 |
| P01871 | 140 | SPBQIQVSWLBE | FALSE | TRUE | FALSE | 23.04 |
| P01871 | 141 | PBQIQVSWLBEG | FALSE | TRUE | FALSE | 13.49 |
| P01871 | 142 | BQIQVSWLBEGK | FALSE | TRUE | FALSE | 40.24 |
| P01871 | 143 | QIQVSWLBEGKQ | FALSE | TRUE | FALSE | 27.98 |
| P01871 | 144 | IQVSWLBEGKQV | FALSE | TRUE | FALSE | 27.99 |
| P01871 | 145 | QVSWLBEGKQVG | FALSE | TRUE | FALSE | 36.42 |
| P01871 | 146 | VSWLBEGKQVGS | FALSE | TRUE | FALSE | 48.91 |
| P01871 | 147 | SWLBEGKQVGSG | FALSE | TRUE | FALSE | 50.87 |

|        |     |              |       |      |       |       |
|--------|-----|--------------|-------|------|-------|-------|
| P01871 | 148 | WLBEGKQVGSGV | FALSE | TRUE | FALSE | 37.27 |
| P01871 | 149 | LBEGKQVGSGVT | FALSE | TRUE | FALSE | 18.28 |
| P01871 | 150 | BEGKQVGSGVTT | FALSE | TRUE | FALSE | 14.49 |
| P01871 | 192 | QSMFTCBVDHBG | FALSE | TRUE | FALSE | 14.98 |
| P01871 | 193 | SMFTCBVDHBGL | FALSE | TRUE | FALSE | 13.88 |
| P01871 | 194 | MFTCBVDHBGLT | FALSE | TRUE | FALSE | 17.27 |
| P01871 | 195 | FTCBVDHBGLTF | FALSE | TRUE | FALSE | 15.17 |
| P01871 | 196 | TCBVDHBGLTFQ | FALSE | TRUE | FALSE | 24.12 |
| P01871 | 197 | CBVDHBGLTFQQ | FALSE | TRUE | FALSE | 28.19 |
| P01871 | 198 | BVDHBGLTFQQN | FALSE | TRUE | FALSE | 36.79 |
| P01871 | 199 | VDHBGLTFQQNA | FALSE | TRUE | FALSE | 18.45 |
| P01871 | 200 | DHBGLTFQQNAS | FALSE | TRUE | FALSE | 10.14 |
| P01871 | 201 | HBGLTFQQNASS | FALSE | TRUE | FALSE | 16.13 |
| P01871 | 202 | BGLTFQQNASSM | FALSE | TRUE | FALSE | 14.1  |
| P01871 | 251 | TYDSVTISWTBQ | FALSE | TRUE | FALSE | 13.2  |
| P01871 | 252 | YDSVTISWTBQN | FALSE | TRUE | FALSE | 12.26 |
| P01871 | 253 | DSVTISWTBQNG | FALSE | TRUE | FALSE | 15.33 |
| P01871 | 254 | SVTISWTBQNGE | FALSE | TRUE | FALSE | 14.12 |
| P01871 | 256 | TISWTBQNGEAV | FALSE | TRUE | FALSE | 24.05 |
| P01871 | 257 | ISWTBQNGEAVK | FALSE | TRUE | FALSE | 52.63 |
| P01871 | 258 | SWTBQNGEAVKT | FALSE | TRUE | FALSE | 55.42 |
| P01871 | 259 | WTBQNGEAVKTH | FALSE | TRUE | FALSE | 47.97 |
| P01871 | 260 | TBQNGEAVKTHT | FALSE | TRUE | FALSE | 28.07 |
| P01871 | 327 | HBPDVYLLPPAB | FALSE | TRUE | FALSE | 10.74 |
| P01871 | 328 | BPDVYLLPPABE | FALSE | TRUE | FALSE | 10.55 |
| P01871 | 330 | DVYLLPPABEQL | FALSE | TRUE | FALSE | 11.41 |
| P01871 | 331 | VYLLPPABEQLN | FALSE | TRUE | FALSE | 11.42 |
| P01871 | 332 | YLLPPABEQLNL | FALSE | TRUE | FALSE | 11.17 |
| P01871 | 333 | LLPPABEQLNLB | FALSE | TRUE | FALSE | 11.7  |
| P01871 | 334 | LPPABEQLNLBE | FALSE | TRUE | FALSE | 18.48 |
| P01871 | 335 | PPABEQLNLBES | FALSE | TRUE | FALSE | 15.56 |
| P01871 | 336 | PABEQLNLBESA | FALSE | TRUE | FALSE | 19.07 |
| P01871 | 337 | ABEQLNLBESAT | FALSE | TRUE | FALSE | 17.34 |
| P01871 | 338 | BEQLNLBESATI | FALSE | TRUE | FALSE | 19.61 |
| P01871 | 359 | ADVQWWMQBGC  | FALSE | TRUE | FALSE | 17.74 |
| P01871 | 360 | DVFVQWWMQBQF | FALSE | TRUE | FALSE | 17.33 |
| P01871 | 361 | VFVQWWMQBQPL | FALSE | TRUE | FALSE | 17.11 |
| P01871 | 362 | FVQWWMQBQPLS | FALSE | TRUE | FALSE | 21.51 |
| P01871 | 363 | VQWWMQBQPLSF | FALSE | TRUE | FALSE | 35.81 |
| P01871 | 364 | QWWMQBQPLSPE | FALSE | TRUE | FALSE | 38.71 |
| P01871 | 365 | WMQBQPLSPEK  | FALSE | TRUE | FALSE | 32.99 |
| P01871 | 366 | MQBGQPLSPEKY | FALSE | TRUE | FALSE | 23.74 |
| P01871 | 367 | QBGQPLSPEKYV | FALSE | TRUE | FALSE | 25.69 |
| P01871 | 368 | BGQPLSPEKYVT | FALSE | TRUE | FALSE | 14.68 |
| P01871 | 416 | HEALPNBVTEBT | FALSE | TRUE | FALSE | 10.08 |
| P19823 | 41  | GKFQLVAENBBY | FALSE | TRUE | FALSE | 12.49 |
| P19823 | 42  | KFQLVAENBBYQ | FALSE | TRUE | FALSE | 11.92 |
| P19823 | 43  | FQLVAENBBYQB | FALSE | TRUE | FALSE | 15.58 |
| P19823 | 44  | QLVAENBBYQBS | FALSE | TRUE | FALSE | 20.38 |
| P19823 | 45  | LVAENBBYQBSL | FALSE | TRUE | FALSE | 13.78 |
| P19823 | 46  | VAENBBYQBSLP | FALSE | TRUE | FALSE | 30.32 |
| P19823 | 47  | AENBBYQBSLPG | FALSE | TRUE | FALSE | 31.11 |

|        |     |               |       |      |       |       |
|--------|-----|---------------|-------|------|-------|-------|
| P19823 | 48  | ENBBYQBSLPGE  | FALSE | TRUE | FALSE | 28.75 |
| P19823 | 49  | NBBYQBSLPGES  | FALSE | TRUE | FALSE | 32.27 |
| P19823 | 50  | BBYQBSLPGESE  | FALSE | TRUE | FALSE | 37.24 |
| P19823 | 51  | BYQBSLPGESEE  | FALSE | TRUE | FALSE | 22.66 |
| P19823 | 74  | SYKVQSTITSBM  | FALSE | TRUE | FALSE | 13.49 |
| P19823 | 75  | YKVQSTITSBMA  | FALSE | TRUE | FALSE | 12.65 |
| P19823 | 77  | VQSTITSBMATT  | FALSE | TRUE | FALSE | 20.27 |
| P19823 | 78  | QSTITSBMATTM  | FALSE | TRUE | FALSE | 21.17 |
| P19823 | 79  | STITSBMATTMI  | FALSE | TRUE | FALSE | 17.73 |
| P19823 | 80  | TITSBMATTMIQ  | FALSE | TRUE | FALSE | 15.24 |
| P19823 | 81  | ITSBMATTMIQS  | FALSE | TRUE | FALSE | 12.43 |
| P19823 | 119 | FSMTVDGKTFBS  | FALSE | TRUE | FALSE | 12.99 |
| P19823 | 120 | SMTVDGKTFBSS  | FALSE | TRUE | FALSE | 11.07 |
| P19823 | 123 | VDGKTFBSSIKE  | FALSE | TRUE | FALSE | 21.21 |
| P19823 | 128 | FBSSIKEKTVGB  | FALSE | TRUE | FALSE | 11.8  |
| P19823 | 135 | KTVGBALYAQAB  | FALSE | TRUE | FALSE | 14.84 |
| P19823 | 136 | TVGBALYAQABA  | FALSE | TRUE | FALSE | 19.77 |
| P19823 | 150 | KTAGLVBSSALD  | FALSE | TRUE | FALSE | 12.14 |
| P19823 | 155 | VBSSALDMENFB  | FALSE | TRUE | FALSE | 12.01 |
| P19823 | 156 | BSSALDMENFBT  | FALSE | TRUE | FALSE | 12.56 |
| P19823 | 184 | QEVKWBKLGSYE  | FALSE | TRUE | FALSE | 11.84 |
| P19823 | 186 | VKWBKLGSYEHB  | FALSE | TRUE | FALSE | 12.26 |
| P19823 | 187 | KWBKLGSYEHBI  | FALSE | TRUE | FALSE | 11.84 |
| P19823 | 193 | SYEHBIYLQPGB  | FALSE | TRUE | FALSE | 26.55 |
| P19823 | 194 | YEHBIYLQPGBL  | FALSE | TRUE | FALSE | 15.79 |
| P19823 | 202 | PGBLAKHLEVDV  | FALSE | TRUE | FALSE | 10.2  |
| P19823 | 255 | VAQQBICPNCBE  | FALSE | TRUE | FALSE | 12.47 |
| P19823 | 256 | AQQBICPNCBET  | FALSE | TRUE | FALSE | 15.03 |
| P19823 | 257 | QQBICPNCBETA  | FALSE | TRUE | FALSE | 16.51 |
| P19823 | 258 | QBICPNCBETAV  | FALSE | TRUE | FALSE | 14.64 |
| P19823 | 259 | BICPNCBETAVD  | FALSE | TRUE | FALSE | 12.23 |
| P19823 | 349 | IDFNQNI BTWBN | FALSE | TRUE | FALSE | 10.63 |
| P19823 | 351 | FNQNI BTWBNDL | FALSE | TRUE | FALSE | 15.2  |
| P19823 | 352 | NQNI BTWBNDLI | FALSE | TRUE | FALSE | 10.84 |
| P19823 | 353 | QNI BTWBNDLIS | FALSE | TRUE | FALSE | 19.02 |
| P19823 | 355 | IBTWBNDLISAT  | FALSE | TRUE | FALSE | 20.81 |
| P19823 | 356 | BTWBNDLISATK  | FALSE | TRUE | FALSE | 16.88 |
| P19823 | 357 | TWBNDLISATKT  | FALSE | TRUE | FALSE | 10.02 |
| P19823 | 358 | WBNDLISATKTQ  | FALSE | TRUE | FALSE | 13.84 |
| P19823 | 375 | BYIEKI QPSGGT | FALSE | TRUE | FALSE | 10.15 |
| P19823 | 453 | MGFDVDYDFLKB  | FALSE | TRUE | FALSE | 10.18 |
| P19823 | 460 | DFLK BLSNENHG | FALSE | TRUE | FALSE | 10.23 |
| P19823 | 464 | BLSNENHGIAQB  | FALSE | TRUE | FALSE | 13.43 |
| P19823 | 596 | BSLAPTAAAKBB  | FALSE | TRUE | FALSE | 12.27 |
| P19823 | 599 | APTAAAKBBITB  | FALSE | TRUE | FALSE | 23.23 |
| P19823 | 600 | PTAAAKBBITBS  | FALSE | TRUE | FALSE | 21.35 |
| P19823 | 601 | TAAAKBBITBSI  | FALSE | TRUE | FALSE | 21.72 |
| P19823 | 603 | AAKBBITBSILQ  | FALSE | TRUE | FALSE | 13.06 |
| P19823 | 604 | AKBBITBSILQM  | FALSE | TRUE | FALSE | 13.1  |
| P19823 | 605 | KBBITBSILQMS  | FALSE | TRUE | FALSE | 17.34 |
| P19823 | 792 | SWSDTAQVTNQB  | FALSE | TRUE | FALSE | 10.08 |
| P19823 | 892 | QKLIITBGLQKD  | FALSE | TRUE | FALSE | 35.11 |

|        |     |              |       |      |       |       |
|--------|-----|--------------|-------|------|-------|-------|
| P19823 | 893 | KLIITBGLQKDY | FALSE | TRUE | FALSE | 23.32 |
| P19823 | 894 | LIITBGLQKDYB | FALSE | TRUE | FALSE | 36.46 |
| P19823 | 895 | IITBGLQKDYBT | FALSE | TRUE | FALSE | 35.78 |
| P19823 | 896 | ITBGLQKDYBTD | FALSE | TRUE | FALSE | 45.95 |
| P19823 | 897 | TBGLQKDYBTDL | FALSE | TRUE | FALSE | 42.26 |
| P19823 | 898 | BGLQKDYBTDLV | FALSE | TRUE | FALSE | 24.14 |
| Q14624 | 36  | YSLTVDSBVSSB | FALSE | TRUE | FALSE | 30.57 |
| Q14624 | 37  | SLTVDSBVSSBF | FALSE | TRUE | FALSE | 21.35 |
| Q14624 | 38  | LTVDSBVSSBFA | FALSE | TRUE | FALSE | 13.35 |
| Q14624 | 39  | TVDSBVSSBFAH | FALSE | TRUE | FALSE | 10.15 |
| Q14624 | 40  | VDSBVSSBFAHT | FALSE | TRUE | FALSE | 12.93 |
| Q14624 | 41  | DSBVSSBFAHTV | FALSE | TRUE | FALSE | 11.17 |
| Q14624 | 45  | SSBFAHTVVTSB | FALSE | TRUE | FALSE | 12.09 |
| Q14624 | 46  | SBFAHTVVTSBV | FALSE | TRUE | FALSE | 10.53 |
| Q14624 | 51  | TVVTSBVVNBAN | FALSE | TRUE | FALSE | 14.28 |
| Q14624 | 52  | VVTSBVVNBANT | FALSE | TRUE | FALSE | 20.11 |
| Q14624 | 53  | VTSBVVNBANTV | FALSE | TRUE | FALSE | 19.33 |
| Q14624 | 54  | TSBVVNBANTVQ | FALSE | TRUE | FALSE | 30.04 |
| Q14624 | 55  | SBVVNBANTVQE | FALSE | TRUE | FALSE | 18.89 |
| Q14624 | 56  | BVVNBANTVQEA | FALSE | TRUE | FALSE | 12.72 |
| Q14624 | 58  | VNBANTVQEATF | FALSE | TRUE | FALSE | 10.04 |
| Q14624 | 59  | NBANTVQEATFQ | FALSE | TRUE | FALSE | 10.3  |
| Q14624 | 144 | LVYEELLKBBLG | FALSE | TRUE | FALSE | 11.49 |
| Q14624 | 145 | VYEELLKBBLGV | FALSE | TRUE | FALSE | 18.81 |
| Q14624 | 146 | YEELLKBBLGVY | FALSE | TRUE | FALSE | 19.8  |
| Q14624 | 147 | EELLKBBLGVYE | FALSE | TRUE | FALSE | 14.22 |
| Q14624 | 148 | ELLKBBLGVYEL | FALSE | TRUE | FALSE | 15.9  |
| Q14624 | 284 | SMSGBKIQQTBE | FALSE | TRUE | FALSE | 26.4  |
| Q14624 | 285 | MSGBKIQQTBEA | FALSE | TRUE | FALSE | 24.25 |
| Q14624 | 286 | SGBKIQQTBEAL | FALSE | TRUE | FALSE | 59.21 |
| Q14624 | 287 | GBKIQQTBEALI | FALSE | TRUE | FALSE | 47.24 |
| Q14624 | 289 | KIQQTBEALIKI | FALSE | TRUE | FALSE | 12.56 |
| Q14624 | 291 | QQTBEALIKILD | FALSE | TRUE | FALSE | 13.25 |
| Q14624 | 292 | QTBEALIKILDD | FALSE | TRUE | FALSE | 19.22 |
| Q14624 | 293 | TBEALIKILDDL | FALSE | TRUE | FALSE | 10.57 |
| Q14624 | 393 | TNPBSIQNNVBE | FALSE | TRUE | FALSE | 15.1  |
| Q14624 | 395 | PBSIQNNVBEAV | FALSE | TRUE | FALSE | 14.38 |
| Q14624 | 396 | BSIQNNVBEAVS | FALSE | TRUE | FALSE | 20.41 |
| Q14624 | 397 | SIQNNVBEAVSG | FALSE | TRUE | FALSE | 11.51 |
| Q14624 | 398 | IQNNVBEAVSGB | FALSE | TRUE | FALSE | 17.68 |
| Q14624 | 399 | QNNVBEAVSGBY | FALSE | TRUE | FALSE | 38.14 |
| Q14624 | 400 | NNVBEAVSGBYS | FALSE | TRUE | FALSE | 36.23 |
| Q14624 | 401 | NVBEAVSGBYSL | FALSE | TRUE | FALSE | 28.63 |
| Q14624 | 402 | VBEAVSGBYSLF | FALSE | TRUE | FALSE | 11.13 |
| Q14624 | 428 | KLALDNGGLABB | FALSE | TRUE | FALSE | 11.84 |
| Q14624 | 429 | LALDNGGLABBI | FALSE | TRUE | FALSE | 13.61 |
| Q14624 | 430 | ALDNGGLABBIH | FALSE | TRUE | FALSE | 12.72 |
| Q14624 | 431 | LDNGGLABBIHE | FALSE | TRUE | FALSE | 17.21 |
| Q14624 | 432 | DNGGLABBIHED | FALSE | TRUE | FALSE | 12.12 |
| Q14624 | 433 | NGGLABBIHEDS | FALSE | TRUE | FALSE | 20.03 |
| Q14624 | 434 | GGLABBIHEDSD | FALSE | TRUE | FALSE | 16.64 |
| Q14624 | 435 | GLABBIHEDSDS | FALSE | TRUE | FALSE | 20.83 |

|        |     |              |       |      |       |       |
|--------|-----|--------------|-------|------|-------|-------|
| Q14624 | 436 | LABBIHEDSDSA | FALSE | TRUE | FALSE | 24.56 |
| Q14624 | 437 | ABBIHEDSDSAL | FALSE | TRUE | FALSE | 14.4  |
| Q14624 | 438 | BBIHEDSDSALQ | FALSE | TRUE | FALSE | 12.18 |
| Q14624 | 568 | QQALBNQALNLS | FALSE | TRUE | FALSE | 14.05 |
| Q14624 | 611 | GESBNBNVHSGS | FALSE | TRUE | FALSE | 13.73 |
| Q14624 | 634 | IPKPEASFSPBB | FALSE | TRUE | FALSE | 19.93 |
| Q14624 | 635 | PKPEASFSPBBG | FALSE | TRUE | FALSE | 19.75 |
| Q14624 | 636 | KPEASFSPBBGW | FALSE | TRUE | FALSE | 30.78 |
| Q14624 | 637 | PEASFSPBBGWN | FALSE | TRUE | FALSE | 22.75 |
| Q14624 | 638 | EASFSPBBGWNB | FALSE | TRUE | FALSE | 37.2  |
| Q14624 | 639 | ASFSPBBGWNBQ | FALSE | TRUE | FALSE | 53.52 |
| Q14624 | 640 | SFSPBBGWNBQA | FALSE | TRUE | FALSE | 34.8  |
| Q14624 | 641 | FSPBBGWNBQAG | FALSE | TRUE | FALSE | 35.89 |
| Q14624 | 642 | SPBBGWNBQAGA | FALSE | TRUE | FALSE | 23.04 |
| Q14624 | 643 | PBBGWNBQAGAA | FALSE | TRUE | FALSE | 11.31 |
| Q14624 | 644 | BBGWNBQAGAAG | FALSE | TRUE | FALSE | 16.22 |
| Q14624 | 645 | BGWNBQAGAAGS | FALSE | TRUE | FALSE | 29.24 |
| Q14624 | 646 | GWNBQAGAAGSB | FALSE | TRUE | FALSE | 32.37 |
| Q14624 | 647 | WNBQAGAAGSBM | FALSE | TRUE | FALSE | 26.59 |
| Q14624 | 648 | NBQAGAAGSBMN | FALSE | TRUE | FALSE | 25.25 |
| Q14624 | 649 | BQAGAAGSBMNF | FALSE | TRUE | FALSE | 22.61 |
| Q14624 | 650 | QAGAAGSBMNF  | FALSE | TRUE | FALSE | 18.78 |
| Q14624 | 652 | GAAGSBMNF    | FALSE | TRUE | FALSE | 13.39 |
| Q14624 | 654 | AGSBMNF      | FALSE | TRUE | FALSE | 12.17 |
| Q14624 | 655 | GSBMNF       | FALSE | TRUE | FALSE | 12.61 |
| Q14624 | 656 | SBMNF        | FALSE | TRUE | FALSE | 12.7  |
| Q14624 | 657 | BMNF         | FALSE | TRUE | FALSE | 16.16 |
| Q14624 | 658 | MNF          | FALSE | TRUE | FALSE | 24.64 |
| Q14624 | 659 | NFB          | FALSE | TRUE | FALSE | 12.29 |
| Q14624 | 660 | FB           | FALSE | TRUE | FALSE | 17.86 |
| Q14624 | 661 | B            | FALSE | TRUE | FALSE | 14.28 |
| Q14624 | 663 | G            | FALSE | TRUE | FALSE | 12.9  |
| Q14624 | 664 | V            | FALSE | TRUE | FALSE | 20.59 |
| Q14624 | 665 | L            | FALSE | TRUE | FALSE | 24.95 |
| Q14624 | 666 | S            | FALSE | TRUE | FALSE | 22.79 |
| Q14624 | 667 | S            | FALSE | TRUE | FALSE | 17.84 |
| Q14624 | 678 | V            | FALSE | TRUE | FALSE | 15.07 |
| Q14624 | 687 | F            | FALSE | TRUE | FALSE | 13.87 |
| Q14624 | 688 | B            | FALSE | TRUE | FALSE | 12.85 |
| Q14624 | 743 | V            | FALSE | TRUE | FALSE | 19.39 |
| Q14624 | 744 | E            | FALSE | TRUE | FALSE | 15.16 |
| Q14624 | 745 | B            | FALSE | TRUE | FALSE | 25.81 |
| Q14624 | 746 | L            | FALSE | TRUE | FALSE | 24.25 |
| Q14624 | 747 | C            | FALSE | TRUE | FALSE | 28.45 |
| Q14624 | 748 | V            | FALSE | TRUE | FALSE | 32.03 |
| Q14624 | 749 | D            | FALSE | TRUE | FALSE | 32.77 |
| Q14624 | 750 | P            | FALSE | TRUE | FALSE | 21.23 |
| Q14624 | 751 | B            | FALSE | TRUE | FALSE | 21.1  |
| Q14624 | 752 | H            | FALSE | TRUE | FALSE | 14.01 |
| Q14624 | 769 | V            | FALSE | TRUE | FALSE | 15.63 |
| Q14624 | 770 | T            | FALSE | TRUE | FALSE | 14.29 |
| Q14624 | 771 | G            | FALSE | TRUE | FALSE | 15.12 |

|        |     |               |       |      |       |       |
|--------|-----|---------------|-------|------|-------|-------|
| Q14624 | 795 | HASPEHVVTBN   | FALSE | TRUE | FALSE | 12.11 |
| Q14624 | 796 | ASPEHVVTBNB   | FALSE | TRUE | FALSE | 10.53 |
| Q14624 | 798 | PEHVVTBNBBS   | FALSE | TRUE | FALSE | 12.63 |
| Q14624 | 799 | EHVVVTBNBBSS  | FALSE | TRUE | FALSE | 17.91 |
| Q14624 | 800 | HVVVTBNBBSSA  | FALSE | TRUE | FALSE | 19.11 |
| Q14624 | 801 | VVVVTBNBBSSAY | FALSE | TRUE | FALSE | 20.76 |
| Q14624 | 802 | VVTBNBBSSAYK  | FALSE | TRUE | FALSE | 11.71 |
| Q14624 | 805 | BNBBSSAYKWKE  | FALSE | TRUE | FALSE | 12.66 |
| Q14624 | 847 | LLFWDGBGEGLB  | FALSE | TRUE | FALSE | 14.97 |
| Q14624 | 848 | LFWDGBGEGLBL  | FALSE | TRUE | FALSE | 19.39 |
| Q14624 | 849 | FWDGBGEGLBLL  | FALSE | TRUE | FALSE | 17.82 |
| Q14624 | 852 | GBGEGLBLLBD   | FALSE | TRUE | FALSE | 10.89 |
| Q14624 | 853 | BGEGLBLLBDT   | FALSE | TRUE | FALSE | 19    |
| Q14624 | 858 | BLLBDTDBFSS   | FALSE | TRUE | FALSE | 15.42 |
| Q14624 | 859 | LLLBDTDBFSSH  | FALSE | TRUE | FALSE | 10.97 |
| Q14624 | 861 | LBDTDBFSSHVG  | FALSE | TRUE | FALSE | 10.02 |
| Q14624 | 886 | SPAASDDGBBTL  | FALSE | TRUE | FALSE | 10.53 |
| Q14624 | 887 | PAASDDGBBTLB  | FALSE | TRUE | FALSE | 13.37 |
| Q14624 | 888 | AASDDGBBTLBV  | FALSE | TRUE | FALSE | 19.69 |
| Q14624 | 889 | ASDDGBBTLBVQ  | FALSE | TRUE | FALSE | 23.16 |
| Q14624 | 890 | SDDGBBTLBVQG  | FALSE | TRUE | FALSE | 26.13 |
| Q14624 | 891 | DDGBBTLBVQGN  | FALSE | TRUE | FALSE | 29.07 |
| Q14624 | 892 | DGBBTLBVQGND  | FALSE | TRUE | FALSE | 28.49 |
| Q14624 | 893 | GBBTLBVQGNDH  | FALSE | TRUE | FALSE | 26.04 |
| Q14624 | 894 | BBTLBVQGNDHS  | FALSE | TRUE | FALSE | 17.84 |
| Q14624 | 897 | LBVQGNDHSATB  | FALSE | TRUE | FALSE | 15.72 |
| Q14624 | 898 | BVQGNDHSATBE  | FALSE | TRUE | FALSE | 20.9  |
| Q14624 | 899 | VQGNDHSATBEB  | FALSE | TRUE | FALSE | 16.76 |
| Q14624 | 900 | QGNDHSATBEBB  | FALSE | TRUE | FALSE | 18.91 |
| Q14624 | 901 | GNDHSATBEBBL  | FALSE | TRUE | FALSE | 24.09 |
| Q14624 | 902 | NDHSATBEBBLD  | FALSE | TRUE | FALSE | 21.01 |
| Q14624 | 903 | DHSATBEBBLDY  | FALSE | TRUE | FALSE | 28.06 |
| Q14624 | 904 | HSATBEBBLDYQ  | FALSE | TRUE | FALSE | 41.57 |
| Q14624 | 905 | SATBEBBLDYQE  | FALSE | TRUE | FALSE | 39.59 |
| Q14624 | 906 | ATBEBBLDYQEG  | FALSE | TRUE | FALSE | 30.02 |
| Q14624 | 907 | TBEBBLDYQEGP  | FALSE | TRUE | FALSE | 35.15 |
| Q14624 | 908 | BEBBLDYQEGPP  | FALSE | TRUE | FALSE | 16.12 |
| Q14624 | 910 | BBLDYQEGPPGV  | FALSE | TRUE | FALSE | 11.39 |
| P01042 | 106 | ECTATVGKBSST  | FALSE | TRUE | FALSE | 12.17 |
| P01042 | 153 | SPDLEPILBHGI  | FALSE | TRUE | FALSE | 10.33 |
| P01042 | 176 | LFMLNEVKBAQB  | FALSE | TRUE | FALSE | 11.07 |
| P01042 | 177 | FMLNEVKBAQBQ  | FALSE | TRUE | FALSE | 27.48 |
| P01042 | 178 | MLNEVKBAQBQV  | FALSE | TRUE | FALSE | 20.93 |
| P01042 | 179 | LNEVKBAQBQVV  | FALSE | TRUE | FALSE | 41.37 |
| P01042 | 180 | NEVKBAQBQVVA  | FALSE | TRUE | FALSE | 18.49 |
| P01042 | 181 | EVKBAQBQVVAG  | FALSE | TRUE | FALSE | 33.42 |
| P01042 | 184 | BAQBQVVAGLNF  | FALSE | TRUE | FALSE | 19.05 |
| P01042 | 185 | AQBQVVAGLNFB  | FALSE | TRUE | FALSE | 26.47 |
| P01042 | 314 | GKKYFIDFVABE  | FALSE | TRUE | FALSE | 26.61 |
| P01042 | 315 | KKYFIDFVABET  | FALSE | TRUE | FALSE | 33.77 |
| P01042 | 316 | KYFIDFVABETT  | FALSE | TRUE | FALSE | 42.64 |
| P01042 | 317 | YFIDFVABETTC  | FALSE | TRUE | FALSE | 22.79 |



|        |     |              |       |      |       |       |
|--------|-----|--------------|-------|------|-------|-------|
| P01042 | 318 | FIDFVABETTCS | FALSE | TRUE | FALSE | 26.15 |
| P01042 | 319 | IDFVABETTCSK | FALSE | TRUE | FALSE | 40.67 |
| P01042 | 320 | DFVABETTCSKE | FALSE | TRUE | FALSE | 31.85 |
| P01042 | 321 | FVABETTCSKES | FALSE | TRUE | FALSE | 32.2  |
| P01042 | 322 | VABETTCSKESN | FALSE | TRUE | FALSE | 17.24 |
| P01042 | 323 | ABETTCSKESNE | FALSE | TRUE | FALSE | 14.3  |
| P01042 | 381 | BPPGFSPFBSSB | FALSE | TRUE | FALSE | 17.58 |
| P01042 | 382 | PPGFSPFBSSBI | FALSE | TRUE | FALSE | 14.38 |
| P01042 | 383 | PGFSPFBSSBIG | FALSE | TRUE | FALSE | 12.98 |
| P01042 | 384 | GFSPFBSSBIGE | FALSE | TRUE | FALSE | 37.35 |
| P01042 | 385 | FSPFBSSBIGEI | FALSE | TRUE | FALSE | 41.6  |
| P01042 | 386 | SPFBSSBIGEIK | FALSE | TRUE | FALSE | 54    |
| P01042 | 387 | PFBSSBIGEIKE | FALSE | TRUE | FALSE | 42.46 |
| P01042 | 388 | FBSSBIGEIKEE | FALSE | TRUE | FALSE | 65.92 |
| P01042 | 389 | BSSBIGEIKEET | FALSE | TRUE | FALSE | 37.68 |
| P01042 | 390 | SSBIGEIKEETT | FALSE | TRUE | FALSE | 17.72 |
| P01042 | 391 | SBIGEIKEETTV | FALSE | TRUE | FALSE | 13.74 |
| P01042 | 416 | EBDSGKEQGHTB | FALSE | TRUE | FALSE | 10.62 |
| P01042 | 417 | BDSGKEQGHTBB | FALSE | TRUE | FALSE | 26.34 |
| P01042 | 418 | DSGKEQGHTBBH | FALSE | TRUE | FALSE | 15.34 |
| P01042 | 419 | SGKEQGHTBBHD | FALSE | TRUE | FALSE | 19.43 |
| P01042 | 420 | GKEQGHTBBHDW | FALSE | TRUE | FALSE | 23.37 |
| P01042 | 421 | KEQGHTBBHDWG | FALSE | TRUE | FALSE | 19    |
| P01042 | 422 | EQGHTBBHDWGH | FALSE | TRUE | FALSE | 15.21 |
| P01042 | 423 | QGHTBBHDWGHE | FALSE | TRUE | FALSE | 19.08 |
| P01042 | 424 | GHTBBHDWGHEK | FALSE | TRUE | FALSE | 28.86 |
| P01042 | 425 | HTBBHDWGHEKQ | FALSE | TRUE | FALSE | 28.52 |
| P01042 | 426 | TBBHDWGHEKQB | FALSE | TRUE | FALSE | 39.69 |
| P01042 | 427 | BBHDWGHEKQBK | FALSE | TRUE | FALSE | 17.07 |
| P01042 | 447 | HEBDQGHGHBG  | FALSE | TRUE | FALSE | 15.91 |
| P01042 | 448 | EBDQGHGHBG   | FALSE | TRUE | FALSE | 18.91 |
| P01042 | 449 | BDQGHGHBG    | FALSE | TRUE | FALSE | 17.85 |
| P01042 | 450 | DQGHGHBG     | FALSE | TRUE | FALSE | 14.19 |
| P01042 | 451 | QGHBG        | FALSE | TRUE | FALSE | 11.24 |
| P01042 | 455 | HQBGLGHGHE   | FALSE | TRUE | FALSE | 21.9  |
| P01042 | 456 | QBGLGHGHEQ   | FALSE | TRUE | FALSE | 24.61 |
| P01042 | 457 | BGLGHGHEQQ   | FALSE | TRUE | FALSE | 10.69 |
| P01042 | 606 | FPDTSKCPGB   | FALSE | TRUE | FALSE | 14.41 |
| Q14739 | 3   | SBKFADGEVVBG | FALSE | TRUE | FALSE | 13.73 |
| Q14739 | 6   | FADGEVVBGBWP | FALSE | TRUE | FALSE | 14.49 |
| Q14739 | 7   | ADGEVVBGBWPG | FALSE | TRUE | FALSE | 10.55 |
| Q14739 | 8   | DGEVVBGBWPGS | FALSE | TRUE | FALSE | 22.8  |
| Q14739 | 9   | GEVVBGBWPGSS | FALSE | TRUE | FALSE | 25.85 |
| Q14739 | 10  | EVVBGBWPGSSL | FALSE | TRUE | FALSE | 31.17 |
| Q14739 | 11  | VVBGBWPGSSLY | FALSE | TRUE | FALSE | 29.2  |
| Q14739 | 12  | VBGBWPGSSLYY | FALSE | TRUE | FALSE | 15.08 |
| Q14739 | 13  | BGBWPGSSLYYE | FALSE | TRUE | FALSE | 12.11 |
| Q14739 | 51  | ENDIKPLTSFBQ | FALSE | TRUE | FALSE | 14.06 |
| Q14739 | 52  | NDIKPLTSFBQB | FALSE | TRUE | FALSE | 33.77 |
| Q14739 | 53  | DIKPLTSFBQBK | FALSE | TRUE | FALSE | 13.68 |
| Q14739 | 56  | PLTSFBQBKGG  | FALSE | TRUE | FALSE | 19.63 |
| Q14739 | 57  | LTSFBQBKGGST | FALSE | TRUE | FALSE | 27.63 |

|        |     |              |       |      |       |       |
|--------|-----|--------------|-------|------|-------|-------|
| Q14739 | 58  | TSFBQBKGGSTS | FALSE | TRUE | FALSE | 40.95 |
| Q14739 | 59  | SFBQBKGGSTSS | FALSE | TRUE | FALSE | 42.61 |
| Q14739 | 60  | FBQBKGGSTSSS | FALSE | TRUE | FALSE | 24.84 |
| Q14739 | 67  | STSSSPSBBBGS | FALSE | TRUE | FALSE | 16.1  |
| Q14739 | 68  | TSSSPSBBBGSB | FALSE | TRUE | FALSE | 18.79 |
| Q14739 | 69  | SSSPSBBBGSBS | FALSE | TRUE | FALSE | 30.35 |
| Q14739 | 70  | SSPSBBBGSBSB | FALSE | TRUE | FALSE | 26.97 |
| Q14739 | 71  | SPSBBBGSBSBS | FALSE | TRUE | FALSE | 37.79 |
| Q14739 | 72  | PSBBBGSBSBSB | FALSE | TRUE | FALSE | 29.36 |
| Q14739 | 73  | SBBBGSBSBSBS | FALSE | TRUE | FALSE | 43.27 |
| Q14739 | 74  | BBBGSBSBSBSB | FALSE | TRUE | FALSE | 29.65 |
| Q14739 | 75  | BBGSBSBSBSBS | FALSE | TRUE | FALSE | 41.44 |
| Q14739 | 76  | BGSBSBSBSBSP | FALSE | TRUE | FALSE | 35.13 |
| Q14739 | 77  | GSBSBSBSBSPG | FALSE | TRUE | FALSE | 27.01 |
| Q14739 | 78  | SBSBSBSBSPGB | FALSE | TRUE | FALSE | 27.05 |
| Q14739 | 79  | BSBSBSBSPGBP | FALSE | TRUE | FALSE | 24.16 |
| Q14739 | 80  | SBSBSBSPGBPP | FALSE | TRUE | FALSE | 27.68 |
| Q14739 | 85  | BSPGBPPKSABB | FALSE | TRUE | FALSE | 22.67 |
| Q14739 | 94  | ABBSASASHQAD | FALSE | TRUE | FALSE | 26.63 |
| Q14739 | 95  | BBSASASHQADI | FALSE | TRUE | FALSE | 17.38 |
| Q14739 | 106 | IKEABBEVEVKL | FALSE | TRUE | FALSE | 14.77 |
| Q14739 | 107 | KEABBEVEVKLT | FALSE | TRUE | FALSE | 15.06 |
| Q14739 | 108 | EABBEVEVKLTP | FALSE | TRUE | FALSE | 15.32 |
| Q14739 | 109 | ABBEVEVKLTPL | FALSE | TRUE | FALSE | 19.5  |
| Q14739 | 110 | BBEVEVKLTPLI | FALSE | TRUE | FALSE | 12.59 |
| Q14739 | 125 | FGNSISBYNGEP | FALSE | TRUE | FALSE | 13.79 |
| Q14739 | 126 | GNSISBYNGEPE | FALSE | TRUE | FALSE | 10.75 |
| Q14739 | 127 | NSISBYNGEPEH | FALSE | TRUE | FALSE | 10.79 |
| Q14739 | 128 | SISBYNGEPEHI | FALSE | TRUE | FALSE | 22.49 |
| Q14739 | 129 | ISBYNGEPEHIE | FALSE | TRUE | FALSE | 16.25 |
| Q14739 | 130 | SBYNGEPEHIEB | FALSE | TRUE | FALSE | 14.7  |
| Q14739 | 131 | BYNGEPEHIEBN | FALSE | TRUE | FALSE | 13.13 |
| Q14739 | 162 | IATQYSLBPBBE | FALSE | TRUE | FALSE | 19.02 |
| Q14739 | 163 | ATQYSLBPBBEE | FALSE | TRUE | FALSE | 21.88 |
| Q14739 | 164 | TQYSLBPBBEEV | FALSE | TRUE | FALSE | 20.83 |
| Q14739 | 165 | QYSLBPBBEEVK | FALSE | TRUE | FALSE | 23.95 |
| Q14739 | 166 | YSLBPBBEEVKL | FALSE | TRUE | FALSE | 14.87 |
| Q14739 | 167 | SLBPBBEEVKLK | FALSE | TRUE | FALSE | 17.59 |
| Q14739 | 168 | LBPBBEEVKLKE | FALSE | TRUE | FALSE | 12.24 |
| Q14739 | 169 | BPBBEEVKLKEI | FALSE | TRUE | FALSE | 16.11 |
| Q14739 | 170 | PBBEEVKLKEID | FALSE | TRUE | FALSE | 13.5  |
| Q14739 | 171 | BBEEVKLKEIDS | FALSE | TRUE | FALSE | 17.99 |
| Q14739 | 192 | LAVBTFEVTPIB | FALSE | TRUE | FALSE | 12.03 |
| Q14739 | 282 | EGTPLIDGBBLK | FALSE | TRUE | FALSE | 12.02 |
| Q14739 | 283 | GTPLIDGBBLKY | FALSE | TRUE | FALSE | 11.01 |
| Q14739 | 284 | TPLIDGBBLKYB | FALSE | TRUE | FALSE | 24.43 |
| Q14739 | 286 | LIDGBBLKYBLN | FALSE | TRUE | FALSE | 12.85 |
| Q14739 | 287 | IDGBBLKYBLNG | FALSE | TRUE | FALSE | 18.64 |
| Q14739 | 288 | DGBBLKYBLNGF | FALSE | TRUE | FALSE | 14.98 |
| Q14739 | 344 | LYMSLKAPBND  | FALSE | TRUE | FALSE | 30.78 |
| Q14739 | 345 | YMBSLKAPBNDL | FALSE | TRUE | FALSE | 49.09 |
| Q14739 | 346 | MBSLKAPBNDLS | FALSE | TRUE | FALSE | 25.47 |

|        |     |              |       |      |       |       |
|--------|-----|--------------|-------|------|-------|-------|
| Q14739 | 362 | GNAVYDFFIGBE | FALSE | TRUE | FALSE | 16.15 |
| Q14739 | 364 | AVYDFFIGBELN | FALSE | TRUE | FALSE | 10.12 |
| Q14739 | 365 | VYDFFIGBELNP | FALSE | TRUE | FALSE | 18.04 |
| Q14739 | 366 | YDFFIGBELNPB | FALSE | TRUE | FALSE | 33.84 |
| Q14739 | 367 | DFFIGBELNPBI | FALSE | TRUE | FALSE | 35.12 |
| Q14739 | 368 | FFIGBELNPBIG | FALSE | TRUE | FALSE | 43.56 |
| Q14739 | 369 | FIGBELNPBIGT | FALSE | TRUE | FALSE | 50.31 |
| Q14739 | 370 | IGBELNPBIGTF | FALSE | TRUE | FALSE | 47    |
| Q14739 | 371 | GBELNPBIGTFD | FALSE | TRUE | FALSE | 40.9  |
| Q14739 | 372 | BELNPBIGTFDL | FALSE | TRUE | FALSE | 19.95 |
| Q14739 | 373 | ELNPBIGTFDLK | FALSE | TRUE | FALSE | 13.92 |
| Q14739 | 496 | CGYVIFBGANSQ | FALSE | TRUE | FALSE | 12.85 |
| Q14739 | 499 | VIFBGANSQKNA | FALSE | TRUE | FALSE | 22.93 |
| Q14739 | 500 | IFBGANSQKNAF | FALSE | TRUE | FALSE | 14.41 |
| Q14739 | 501 | FBGANSQKNAFB | FALSE | TRUE | FALSE | 17.26 |
| Q14739 | 541 | GFVBHPNYLGD  | FALSE | TRUE | FALSE | 11.06 |
| Q14739 | 577 | TMLLVHBEABDE | FALSE | TRUE | FALSE | 13.71 |
| Q14739 | 578 | MLLVHBEABDEY | FALSE | TRUE | FALSE | 15.32 |
| Q14739 | 579 | LLVHBEABDEYH | FALSE | TRUE | FALSE | 40.8  |
| Q14739 | 580 | LVHBEABDEYHC | FALSE | TRUE | FALSE | 26.98 |
| Q14739 | 581 | VHBEABDEYHCK | FALSE | TRUE | FALSE | 20.88 |
| Q14739 | 582 | HBEABDEYHCKK | FALSE | TRUE | FALSE | 20.08 |
| P02750 | 1   | MSSWSBQBPKSP | FALSE | TRUE | FALSE | 26.02 |
| P02750 | 2   | SSWSBQBPKSPG | FALSE | TRUE | FALSE | 16.56 |
| P02750 | 3   | SWSBQBPKSPGG | FALSE | TRUE | FALSE | 16.85 |
| P02750 | 4   | WSBQBPKSPGGI | FALSE | TRUE | FALSE | 21.07 |
| P02750 | 117 | QLBVLDLTBNAL | FALSE | TRUE | FALSE | 10.57 |
| P02750 | 118 | LBVLDLTBNALT | FALSE | TRUE | FALSE | 15.15 |
| P02750 | 119 | BVLDLTBNALTG | FALSE | TRUE | FALSE | 22.66 |
| P02750 | 120 | VLDLTBNALTGL | FALSE | TRUE | FALSE | 15.66 |
| P02750 | 121 | LDLTBNALTGLP | FALSE | TRUE | FALSE | 18.82 |
| P02750 | 122 | DLTBNALTGLPP | FALSE | TRUE | FALSE | 19.53 |
| P02750 | 123 | LBNALTGLPPG  | FALSE | TRUE | FALSE | 57.24 |
| P02750 | 124 | TBNALTGLPPGL | FALSE | TRUE | FALSE | 26.96 |
| P02750 | 203 | LPPDLLBGPLQL | FALSE | TRUE | FALSE | 10.4  |
| P02750 | 206 | DLLBGPLQLEBL | FALSE | TRUE | FALSE | 11.91 |
| P02750 | 207 | LLBGPLQLEBLH | FALSE | TRUE | FALSE | 15.78 |
| P02750 | 209 | BGPLQLEBLHLE | FALSE | TRUE | FALSE | 10.13 |
| P02750 | 248 | LABVAAGAFQGL | FALSE | TRUE | FALSE | 18.99 |
| P02750 | 249 | ABVAAGAFQGLB | FALSE | TRUE | FALSE | 23.34 |
| P02750 | 250 | BVAAGAFQGLBQ | FALSE | TRUE | FALSE | 21.24 |
| P02750 | 251 | VAAGAFQGLBQL | FALSE | TRUE | FALSE | 12.7  |
| P02750 | 252 | AAGAFQGLBQLD | FALSE | TRUE | FALSE | 14.16 |
| P02750 | 253 | AGAFQGLBQLDM | FALSE | TRUE | FALSE | 12.8  |
| P02750 | 254 | GAFQGLBQLDML | FALSE | TRUE | FALSE | 10.71 |
| P02750 | 255 | AFQGLBQLDMLD | FALSE | TRUE | FALSE | 16.26 |
| P02750 | 256 | FQGLBQLDMLDL | FALSE | TRUE | FALSE | 15.42 |
| P22894 | 41  | YQLPSNQYQSTB | FALSE | TRUE | FALSE | 19.89 |
| P22894 | 47  | QYQSTBKNGTNV | FALSE | TRUE | FALSE | 10.76 |
| P22894 | 48  | YQSTBKNGTNVI | FALSE | TRUE | FALSE | 12.41 |
| P22894 | 99  | FMLTPGNPKWEB | FALSE | TRUE | FALSE | 10.98 |
| P22894 | 105 | NPKWEBTNLTYB | FALSE | TRUE | FALSE | 16.91 |

|        |     |              |       |      |       |       |
|--------|-----|--------------|-------|------|-------|-------|
| P22894 | 107 | KWEBTNLTYBIB | FALSE | TRUE | FALSE | 12.2  |
| P22894 | 108 | WEBTNLTYBIBN | FALSE | TRUE | FALSE | 15.61 |
| P22894 | 109 | EBTNLTYBIBNY | FALSE | TRUE | FALSE | 14.28 |
| P22894 | 110 | BTNLTYBIBNYT | FALSE | TRUE | FALSE | 10.86 |
| P22894 | 111 | TNLTYBIBNYTP | FALSE | TRUE | FALSE | 13.55 |
| P22894 | 112 | NLTYBIBNYTPQ | FALSE | TRUE | FALSE | 11.51 |
| P22894 | 114 | TYBIBNYTPQLS | FALSE | TRUE | FALSE | 20.06 |
| P22894 | 115 | YBIBNYTPQLSE | FALSE | TRUE | FALSE | 23.6  |
| P22894 | 144 | SPLIFTBISQGE | FALSE | TRUE | FALSE | 14.9  |
| P22894 | 146 | LIFTBISQGEAD | FALSE | TRUE | FALSE | 19.27 |
| P22894 | 147 | IFTBISQGEADI | FALSE | TRUE | FALSE | 16.2  |
| P22894 | 148 | FTBISQGEADIN | FALSE | TRUE | FALSE | 11.99 |
| P22894 | 160 | IAFYQBDHGDNS | FALSE | TRUE | FALSE | 14.82 |
| P22894 | 161 | AFYQBDHGDNSP | FALSE | TRUE | FALSE | 17.46 |
| P22894 | 232 | GALMYPNYAFBE | FALSE | TRUE | FALSE | 42.85 |
| P22894 | 233 | ALMYPNYAFBET | FALSE | TRUE | FALSE | 60.75 |
| P22894 | 234 | LMYPNYAFBETS | FALSE | TRUE | FALSE | 61.18 |
| P22894 | 235 | MYPNYAFBETSN | FALSE | TRUE | FALSE | 58.69 |
| P22894 | 236 | YPNYAFBETSNY | FALSE | TRUE | FALSE | 51.05 |
| P22894 | 237 | PNYAFBETSNYS | FALSE | TRUE | FALSE | 49.56 |
| P22894 | 238 | NYAFBETSNYSL | FALSE | TRUE | FALSE | 29.95 |
| P22894 | 239 | YAFBETSNYSLP | FALSE | TRUE | FALSE | 53.74 |
| P22894 | 240 | AFBETSNYSLPQ | FALSE | TRUE | FALSE | 31.56 |
| P22894 | 241 | FBETSNYSLPQD | FALSE | TRUE | FALSE | 27.03 |
| P22894 | 290 | TLBGEILFFKDB | FALSE | TRUE | FALSE | 13.39 |
| P22894 | 291 | LBGEILFFKDBY | FALSE | TRUE | FALSE | 12.11 |
| P22894 | 299 | KDBYFWBBHPQL | FALSE | TRUE | FALSE | 21.63 |
| P22894 | 300 | DBYFWBBHPQLQ | FALSE | TRUE | FALSE | 25.49 |
| P22894 | 301 | BYFWBBHPQLQB | FALSE | TRUE | FALSE | 33.08 |
| P22894 | 302 | YFWBBHPQLQBV | FALSE | TRUE | FALSE | 26.36 |
| P22894 | 303 | FWBBHPQLQBVE | FALSE | TRUE | FALSE | 29.9  |
| P22894 | 304 | WBBHPQLQBVEM | FALSE | TRUE | FALSE | 34.73 |
| P22894 | 305 | BBHPQLQBVEMN | FALSE | TRUE | FALSE | 25.52 |
| P22894 | 306 | BHPQLQBVEMNF | FALSE | TRUE | FALSE | 13.09 |
| P22894 | 392 | NDQFWBYDNQBQ | FALSE | TRUE | FALSE | 12.1  |
| P22894 | 394 | QFWBYDNQBQFM | FALSE | TRUE | FALSE | 12.31 |
| P22894 | 395 | FWBYDNQBQFME | FALSE | TRUE | FALSE | 11.19 |
| P22894 | 396 | WBYDNQBQFMEP | FALSE | TRUE | FALSE | 15.66 |
| P22894 | 397 | BYDNQBQFMEPG | FALSE | TRUE | FALSE | 24.94 |
| P22894 | 400 | NQBQFMEPGYPK | FALSE | TRUE | FALSE | 10.92 |
| P22894 | 401 | QBQFMEPGYPKS | FALSE | TRUE | FALSE | 16.58 |
| P22894 | 443 | YAFDLIAQBVTB | FALSE | TRUE | FALSE | 18.99 |
| P22894 | 444 | AFDLIAQBVTBV | FALSE | TRUE | FALSE | 19.64 |
| P22894 | 446 | DLIAQBVTBVAB | FALSE | TRUE | FALSE | 12.26 |
| P22894 | 447 | LIAQBVTBVABG | FALSE | TRUE | FALSE | 20.43 |
| P22894 | 448 | IAQBVTBVABGN | FALSE | TRUE | FALSE | 35.75 |
| P22894 | 449 | AQBVTBVABGNK | FALSE | TRUE | FALSE | 35.28 |
| P22894 | 450 | QBVTBVABGNKW | FALSE | TRUE | FALSE | 36.27 |
| P22894 | 451 | BVTBVABGNKWL | FALSE | TRUE | FALSE | 29.55 |
| P22894 | 452 | VTBVABGNKWLN | FALSE | TRUE | FALSE | 22.89 |
| P22894 | 453 | TBVABGNKWLNC | FALSE | TRUE | FALSE | 31.63 |
| P22894 | 454 | BVABGNKWLNCB | FALSE | TRUE | FALSE | 20.6  |

|        |     |              |       |      |       |       |
|--------|-----|--------------|-------|------|-------|-------|
| P22894 | 455 | VABGNKWLNCBY | FALSE | TRUE | FALSE | 13.04 |
| P22894 | 456 | ABGNKWLNCBYG | FALSE | TRUE | FALSE | 12.49 |
| P41218 | 115 | APTABNKLTSEA | FALSE | TRUE | FALSE | 11.91 |
| P41218 | 116 | PTABNKLTSEAB | FALSE | TRUE | FALSE | 21.13 |
| P41218 | 117 | TABNKLTSEABG | FALSE | TRUE | FALSE | 24.61 |
| P41218 | 118 | ABNKLTSEABGB | FALSE | TRUE | FALSE | 24    |
| P41218 | 119 | BNKLTSEABGBI | FALSE | TRUE | FALSE | 35.27 |
| P41218 | 120 | NKLTSEABGBIP | FALSE | TRUE | FALSE | 24.99 |
| P41218 | 121 | KLTSEABGBIPV | FALSE | TRUE | FALSE | 33.45 |
| P41218 | 122 | LTSEABGBIPVA | FALSE | TRUE | FALSE | 26.53 |
| P41218 | 123 | TSEABGBIPVAQ | FALSE | TRUE | FALSE | 35.23 |
| P41218 | 124 | SEABGBIPVAQK | FALSE | TRUE | FALSE | 54.18 |
| P41218 | 125 | EABGBIPVAQKB | FALSE | TRUE | FALSE | 42.59 |
| P41218 | 194 | TQAQBQVDABBN | FALSE | TRUE | FALSE | 14.74 |
| P41218 | 195 | QAQBQVDABBNV | FALSE | TRUE | FALSE | 20.09 |
| P41218 | 197 | QBQVDABBNVPQ | FALSE | TRUE | FALSE | 25.22 |
| P41218 | 198 | BQVDABBNVPQN | FALSE | TRUE | FALSE | 29.71 |
| P41218 | 199 | QVDABBNVPQND | FALSE | TRUE | FALSE | 24.72 |
| P41218 | 200 | VDABBNVPQNDP | FALSE | TRUE | FALSE | 14.47 |
| P41218 | 201 | DABBNVPQNDPV | FALSE | TRUE | FALSE | 10.93 |
| P41218 | 202 | ABBNVPQNDPVT | FALSE | TRUE | FALSE | 17.31 |
| P05164 | 71  | QLVDKAYKEBBE | FALSE | TRUE | FALSE | 26.28 |
| P05164 | 72  | LVDKAYKEBBES | FALSE | TRUE | FALSE | 20.25 |
| P05164 | 73  | VDKAYKEBBESI | FALSE | TRUE | FALSE | 28.56 |
| P05164 | 74  | DKAYKEBBESIK | FALSE | TRUE | FALSE | 34.88 |
| P05164 | 76  | AYKEBBESIKQB | FALSE | TRUE | FALSE | 49.62 |
| P05164 | 77  | YKEBBESIKQBL | FALSE | TRUE | FALSE | 64.15 |
| P05164 | 78  | KEBBESIKQBLB | FALSE | TRUE | FALSE | 48.23 |
| P05164 | 79  | EBBESIKQBLBS | FALSE | TRUE | FALSE | 53.94 |
| P05164 | 80  | BBESIKQBLBSG | FALSE | TRUE | FALSE | 66.74 |
| P05164 | 81  | BESIKQBLBSGS | FALSE | TRUE | FALSE | 25.94 |
| P05164 | 86  | QBLBSGSASPME | FALSE | TRUE | FALSE | 21.78 |
| P05164 | 87  | BLBSGSASPMEL | FALSE | TRUE | FALSE | 18.61 |
| P05164 | 101 | YFKQPVAATBTA | FALSE | TRUE | FALSE | 10.99 |
| P05164 | 102 | FKQPVAATBTAV | FALSE | TRUE | FALSE | 11.84 |
| P05164 | 103 | KQPVAATBTAVB | FALSE | TRUE | FALSE | 14.36 |
| P05164 | 104 | QPVAATBTAVBA | FALSE | TRUE | FALSE | 17.31 |
| P05164 | 106 | VAATBTAVBAAD | FALSE | TRUE | FALSE | 12.72 |
| P05164 | 107 | AATBTAVBAADY | FALSE | TRUE | FALSE | 18.78 |
| P05164 | 108 | ATBTAVBAADYL | FALSE | TRUE | FALSE | 17.89 |
| P05164 | 109 | TBTAVBAADYLH | FALSE | TRUE | FALSE | 20    |
| P05164 | 110 | BTAVBAADYLHV | FALSE | TRUE | FALSE | 12.59 |
| P05164 | 172 | KYBTITGMCNNB | FALSE | TRUE | FALSE | 10.03 |
| P05164 | 173 | YBTITGMCNNBB | FALSE | TRUE | FALSE | 22.61 |
| P05164 | 174 | BTITGMCNNBBS | FALSE | TRUE | FALSE | 16.26 |
| P05164 | 175 | TITGMCNNBBSP | FALSE | TRUE | FALSE | 12.46 |
| P05164 | 176 | ITGMCNNBBSPT | FALSE | TRUE | FALSE | 11.01 |
| P05164 | 177 | TGMCNNBBSPTL | FALSE | TRUE | FALSE | 12.11 |
| P05164 | 178 | GMCNNBBSPTLG | FALSE | TRUE | FALSE | 15.22 |
| P05164 | 179 | MCNNBBSPTLGA | FALSE | TRUE | FALSE | 12.89 |
| P05164 | 181 | NNBBSPTLGASN | FALSE | TRUE | FALSE | 16.25 |
| P05164 | 182 | NBBSPTLGASNB | FALSE | TRUE | FALSE | 31.91 |

|        |     |              |       |      |       |       |
|--------|-----|--------------|-------|------|-------|-------|
| P05164 | 183 | BBSPTLGASNBA | FALSE | TRUE | FALSE | 15.9  |
| P05164 | 184 | BSPTLGASNBAF | FALSE | TRUE | FALSE | 12.45 |
| P05164 | 186 | PTLGASNBAFVB | FALSE | TRUE | FALSE | 12.52 |
| P05164 | 213 | WTPGVKBNGFPV | FALSE | TRUE | FALSE | 12.91 |
| P05164 | 216 | GVKBNGFPVALA | FALSE | TRUE | FALSE | 10.03 |
| P05164 | 217 | VKBNGFPVALAB | FALSE | TRUE | FALSE | 10    |
| P05164 | 218 | KBNGFPVALABA | FALSE | TRUE | FALSE | 16.99 |
| P05164 | 219 | BNGFPVALABAV | FALSE | TRUE | FALSE | 10.13 |
| P05164 | 222 | FPVALABAVSNE | FALSE | TRUE | FALSE | 16.32 |
| P05164 | 224 | VALABAVSNEIV | FALSE | TRUE | FALSE | 10.3  |
| P05164 | 265 | FTPEPAABASFV | FALSE | TRUE | FALSE | 16.36 |
| P05164 | 266 | TPEPAABASFVT | FALSE | TRUE | FALSE | 10.98 |
| P05164 | 268 | EPAABASFVTGV | FALSE | TRUE | FALSE | 15.21 |
| P05164 | 269 | PAABASFVTGVN | FALSE | TRUE | FALSE | 15.66 |
| P05164 | 270 | AABASFVTGVNC | FALSE | TRUE | FALSE | 10.33 |
| P05164 | 343 | YGSEEPLABNLB | FALSE | TRUE | FALSE | 12.59 |
| P05164 | 344 | GSEEPLABNLBN | FALSE | TRUE | FALSE | 10.31 |
| P05164 | 347 | EPLABNLBNMSN | FALSE | TRUE | FALSE | 10.88 |
| P05164 | 348 | PLABNLBNMSNQ | FALSE | TRUE | FALSE | 11.74 |
| P05164 | 349 | LABNLBNMSNQL | FALSE | TRUE | FALSE | 22.67 |
| P05164 | 350 | ABNLBNMSNQLG | FALSE | TRUE | FALSE | 15    |
| P05164 | 363 | LAVNQBFQDNGB | FALSE | TRUE | FALSE | 14.94 |
| P05164 | 365 | VNQBFQDNGBAL | FALSE | TRUE | FALSE | 11.12 |
| P05164 | 366 | NQBFQDNGBALL | FALSE | TRUE | FALSE | 18.71 |
| P05164 | 367 | QBFQDNGBALLP | FALSE | TRUE | FALSE | 27.17 |
| P05164 | 368 | BFQDNGBALLPF | FALSE | TRUE | FALSE | 14.49 |
| P05164 | 369 | FQDNGBALLPFD | FALSE | TRUE | FALSE | 10.36 |
| P05164 | 373 | GBALLPFDNLHD | FALSE | TRUE | FALSE | 12.24 |
| P05164 | 385 | DPCLLTNBSABI | FALSE | TRUE | FALSE | 27.42 |
| P05164 | 386 | PCLLTNBSABIP | FALSE | TRUE | FALSE | 12.89 |
| P05164 | 387 | CLLTNBSABIPC | FALSE | TRUE | FALSE | 13.25 |
| P05164 | 388 | LLTNBSABIPCF | FALSE | TRUE | FALSE | 15.21 |
| P05164 | 390 | TNBSABIPCFLA | FALSE | TRUE | FALSE | 10.1  |
| P05164 | 391 | NBSABIPCFLAG | FALSE | TRUE | FALSE | 10.26 |
| P05164 | 392 | BSABIPCFLAGD | FALSE | TRUE | FALSE | 14.62 |
| P05164 | 394 | ABIPCFLAGDTB | FALSE | TRUE | FALSE | 13.06 |
| P05164 | 416 | HTLLLBEHNBLA | FALSE | TRUE | FALSE | 10.76 |
| P05164 | 417 | TLLLBEHNBLAT | FALSE | TRUE | FALSE | 16.66 |
| P05164 | 418 | LLLBEHNBLATE | FALSE | TRUE | FALSE | 30.85 |
| P05164 | 419 | LLBEHNBLATEL | FALSE | TRUE | FALSE | 25.09 |
| P05164 | 420 | LBEHNBLATELK | FALSE | TRUE | FALSE | 20.2  |
| P05164 | 421 | BEHNBLATELKS | FALSE | TRUE | FALSE | 15    |
| P05164 | 431 | KSLNPBWDGEBL | FALSE | TRUE | FALSE | 10.24 |
| P05164 | 436 | BWDGEBLYQEAB | FALSE | TRUE | FALSE | 11.66 |
| P05164 | 438 | DGEBLYQEABKI | FALSE | TRUE | FALSE | 11.33 |
| P05164 | 439 | GEBLYQEABKIV | FALSE | TRUE | FALSE | 15.91 |
| P05164 | 440 | EBLYQEABKIVG | FALSE | TRUE | FALSE | 12.49 |
| P05164 | 441 | BLYQEABKIVGA | FALSE | TRUE | FALSE | 16.5  |
| P05164 | 442 | LYQEABKIVGAM | FALSE | TRUE | FALSE | 13.19 |
| P05164 | 443 | YQEABKIVGAMV | FALSE | TRUE | FALSE | 14.08 |
| P05164 | 444 | QEABKIVGAMVQ | FALSE | TRUE | FALSE | 11.86 |
| P05164 | 470 | TAMBKYLPTYBS | FALSE | TRUE | FALSE | 11.25 |

|        |     |              |       |      |       |       |
|--------|-----|--------------|-------|------|-------|-------|
| P05164 | 476 | LPTYBSYNDSVD | FALSE | TRUE | FALSE | 10.59 |
| P05164 | 478 | TYBSYNDSVDPB | FALSE | TRUE | FALSE | 13.54 |
| P05164 | 479 | YBSYNDSVDPBI | FALSE | TRUE | FALSE | 12.74 |
| P05164 | 504 | LIQPFMFBLDNB | FALSE | TRUE | FALSE | 13.38 |
| P05164 | 505 | IQPFMFBLDNBY | FALSE | TRUE | FALSE | 11.11 |
| P05164 | 506 | QPFMFBLDNBYQ | FALSE | TRUE | FALSE | 15.43 |
| P05164 | 507 | PFMFBLDNBYQP | FALSE | TRUE | FALSE | 10.4  |
| P05164 | 508 | FMFBLDNBYQPM | FALSE | TRUE | FALSE | 17.68 |
| P05164 | 509 | MFBLDNBYQPME | FALSE | TRUE | FALSE | 16.57 |
| P05164 | 510 | FBLDNBYQPMEP | FALSE | TRUE | FALSE | 18.49 |
| P05164 | 544 | DPILBGLMATPA | FALSE | TRUE | FALSE | 12.17 |
| P05164 | 546 | ILBGLMATPAKL | FALSE | TRUE | FALSE | 10.04 |
| P05164 | 547 | LBGLMATPAKLN | FALSE | TRUE | FALSE | 10.45 |
| P05164 | 556 | KLNBQNQIAVDE | FALSE | TRUE | FALSE | 24.56 |
| P05164 | 557 | LNBQNQIAVDEI | FALSE | TRUE | FALSE | 22.78 |
| P05164 | 558 | NBQNQIAVDEIB | FALSE | TRUE | FALSE | 21.74 |
| P05164 | 567 | EIBEBLFEQVMB | FALSE | TRUE | FALSE | 13.79 |
| P05164 | 568 | IBEBLFEQVMBI | FALSE | TRUE | FALSE | 27.27 |
| P05164 | 569 | BEBLFEQVMBIG | FALSE | TRUE | FALSE | 21.34 |
| P05164 | 577 | MBIGLDLPALNM | FALSE | TRUE | FALSE | 12.27 |
| P05164 | 586 | LNMQBSBDHGLP | FALSE | TRUE | FALSE | 11.62 |
| P05164 | 587 | NMQBSBDHGLPG | FALSE | TRUE | FALSE | 10.27 |
| P05164 | 588 | MQBSBDHGLPGY | FALSE | TRUE | FALSE | 13.87 |
| P05164 | 589 | QBSBDHGLPGYN | FALSE | TRUE | FALSE | 23.37 |
| P05164 | 590 | BSBDHGLPGYNA | FALSE | TRUE | FALSE | 17.67 |
| P05164 | 593 | DHGLPGYNAWBB | FALSE | TRUE | FALSE | 15.71 |
| P05164 | 601 | AWBBFCGLPQPE | FALSE | TRUE | FALSE | 10.4  |
| P05164 | 602 | WBBFCGLPQPET | FALSE | TRUE | FALSE | 13.59 |
| P05164 | 642 | IWMGGVSEPLKB | FALSE | TRUE | FALSE | 12.12 |
| P05164 | 663 | CIIGTQFBKLB  | FALSE | TRUE | FALSE | 21.52 |
| P05164 | 664 | IIGTQFBKLBDG | FALSE | TRUE | FALSE | 19.19 |
| P05164 | 665 | IGTQFBKLBDGD | FALSE | TRUE | FALSE | 29.82 |
| P05164 | 666 | GTQFBKLBDGDB | FALSE | TRUE | FALSE | 43.55 |
| P05164 | 667 | TQFBKLBDGDBF | FALSE | TRUE | FALSE | 58.21 |
| P05164 | 668 | QFBKLBDGDBFW | FALSE | TRUE | FALSE | 32.99 |
| P05164 | 669 | FBKLBDGDBFVW | FALSE | TRUE | FALSE | 18.41 |
| P05164 | 670 | BKLBDGDBFVWE | FALSE | TRUE | FALSE | 15.58 |
| P05164 | 686 | FSMQQBQALAQI | FALSE | TRUE | FALSE | 16.26 |
| P05164 | 687 | SMQQBQALAQIS | FALSE | TRUE | FALSE | 17.49 |
| P05164 | 688 | MQQBQALAQISL | FALSE | TRUE | FALSE | 11.65 |
| P05164 | 689 | QQBQALAQISLP | FALSE | TRUE | FALSE | 29.23 |
| P05164 | 690 | QBQALAQISLPB | FALSE | TRUE | FALSE | 38.58 |
| P05164 | 732 | TLPALNLASWBE | FALSE | TRUE | FALSE | 11    |
| P05164 | 734 | PALNLASWBEAS | FALSE | TRUE | FALSE | 11.01 |
| P35579 | 155 | DTAYBSMMQDBE | FALSE | TRUE | FALSE | 10.15 |
| P35579 | 156 | TAYBSMMQDBED | FALSE | TRUE | FALSE | 10.49 |
| P35579 | 157 | AYBSMMQDBEDQ | FALSE | TRUE | FALSE | 10.72 |
| P35579 | 207 | LEBQLLQANPIL | FALSE | TRUE | FALSE | 10.68 |
| P35579 | 255 | ETYLLEKSBAIB | FALSE | TRUE | FALSE | 13.57 |
| P35579 | 256 | TYLLEKSBAIBQ | FALSE | TRUE | FALSE | 29.53 |
| P35579 | 259 | LEKSBAIBQAKE | FALSE | TRUE | FALSE | 27.41 |
| P35579 | 260 | EKSBAIBQAKEE | FALSE | TRUE | FALSE | 26.91 |

|        |     |               |       |      |       |       |
|--------|-----|---------------|-------|------|-------|-------|
| P35579 | 261 | KSBAIBQAKEEB  | FALSE | TRUE | FALSE | 14.24 |
| P35579 | 262 | SBAIBQAKEEBT  | FALSE | TRUE | FALSE | 47.24 |
| P35579 | 263 | BAIBQAKEEBTF  | FALSE | TRUE | FALSE | 50.22 |
| P35579 | 264 | AIBQAKEEBTFH  | FALSE | TRUE | FALSE | 21.03 |
| P35579 | 265 | IBQAKEEBTFHI  | FALSE | TRUE | FALSE | 22.62 |
| P35579 | 377 | LLGINVTDFTBG  | FALSE | TRUE | FALSE | 15.09 |
| P35579 | 378 | LGINVTDFTBGI  | FALSE | TRUE | FALSE | 21.43 |
| P35579 | 379 | GINVTDFTBGIL  | FALSE | TRUE | FALSE | 14.17 |
| P35579 | 380 | INVTDFTBGILT  | FALSE | TRUE | FALSE | 17.25 |
| P35579 | 381 | NVTDFTBGILTP  | FALSE | TRUE | FALSE | 10.3  |
| P35579 | 382 | VTDFTBGILTPB  | FALSE | TRUE | FALSE | 24.95 |
| P35579 | 383 | TDFTBGILTPBI  | FALSE | TRUE | FALSE | 35.57 |
| P35579 | 384 | DFTBGILTPBIK  | FALSE | TRUE | FALSE | 17.54 |
| P35579 | 385 | FTBGILTPBIKV  | FALSE | TRUE | FALSE | 10.3  |
| P35579 | 386 | TBGILTPBIKVG  | FALSE | TRUE | FALSE | 11.12 |
| P35579 | 388 | GILTPBIKVGBD  | FALSE | TRUE | FALSE | 10.44 |
| P35579 | 389 | ILTPBIKVGBDY  | FALSE | TRUE | FALSE | 11.42 |
| P35579 | 390 | LTPBIKVGBDYV  | FALSE | TRUE | FALSE | 15.13 |
| P35579 | 391 | TPBIKVGBDYVQ  | FALSE | TRUE | FALSE | 16.36 |
| P35579 | 416 | ALAKATYEBMFB  | FALSE | TRUE | FALSE | 10.71 |
| P35579 | 437 | LDKTKBQGASFI  | FALSE | TRUE | FALSE | 10.67 |
| P35579 | 489 | QEEYQBEGIEWN  | FALSE | TRUE | FALSE | 12.9  |
| P35579 | 490 | EEYQBEGIEWNF  | FALSE | TRUE | FALSE | 13.07 |
| P35579 | 491 | EYQBEGIEWNFI  | FALSE | TRUE | FALSE | 10.06 |
| P35579 | 492 | YQBEGIEWNFID  | FALSE | TRUE | FALSE | 22.2  |
| P35579 | 493 | QBEGIEWNFIDF  | FALSE | TRUE | FALSE | 11.55 |
| P35579 | 628 | SETALPGAFKTB  | FALSE | TRUE | FALSE | 22.72 |
| P35579 | 635 | AFKTBKGMFBTV  | FALSE | TRUE | FALSE | 14.36 |
| P35579 | 636 | FKTBKGMFBTVG  | FALSE | TRUE | FALSE | 10.17 |
| P35579 | 638 | TBKGMFBTVGQL  | FALSE | TRUE | FALSE | 12.3  |
| P35579 | 642 | MFBTVGQLYKEQ  | FALSE | TRUE | FALSE | 14.54 |
| P35579 | 659 | ATLBNTNPNFVB  | FALSE | TRUE | FALSE | 14.79 |
| P35579 | 697 | VLEGIBICBQGF  | FALSE | TRUE | FALSE | 10.78 |
| P35579 | 698 | LEGIBICBQGFP  | FALSE | TRUE | FALSE | 12.24 |
| P35579 | 699 | EGIBICBQGFPN  | FALSE | TRUE | FALSE | 19.45 |
| P35579 | 700 | GIBICBQGFPNB  | FALSE | TRUE | FALSE | 32.79 |
| P35579 | 701 | IBICBQGFPNBV  | FALSE | TRUE | FALSE | 27.71 |
| P35579 | 702 | BICBQGFPNBVV  | FALSE | TRUE | FALSE | 33.16 |
| P35579 | 703 | ICBQGFPNBVVF  | FALSE | TRUE | FALSE | 10.05 |
| P35579 | 704 | CBQGFPNBVVFQ  | FALSE | TRUE | FALSE | 22.17 |
| P35579 | 705 | BQGFPNBVVFQE  | FALSE | TRUE | FALSE | 18.79 |
| P35579 | 709 | PNBVVFQEFBQB  | FALSE | TRUE | FALSE | 24.45 |
| P35579 | 711 | BVVVFQEFBQBYE | FALSE | TRUE | FALSE | 15.02 |
| P35579 | 712 | VVFQEFBQBYEI  | FALSE | TRUE | FALSE | 10.22 |
| P35579 | 713 | VFQEFBQBYEIL  | FALSE | TRUE | FALSE | 15.95 |
| P35579 | 714 | FQEFBQBYEILT  | FALSE | TRUE | FALSE | 22.87 |
| P35579 | 715 | QEFBQBYEILTP  | FALSE | TRUE | FALSE | 41.63 |
| P35579 | 716 | EFBQBYEILTPN  | FALSE | TRUE | FALSE | 46.64 |
| P35579 | 717 | FBQBYEILTPNS  | FALSE | TRUE | FALSE | 33.6  |
| P35579 | 718 | BQBYEILTPNSI  | FALSE | TRUE | FALSE | 18.54 |
| P35579 | 719 | QBYEILTPNSIP  | FALSE | TRUE | FALSE | 11.15 |
| P35579 | 763 | FBAGVLAHLEEE  | FALSE | TRUE | FALSE | 11.61 |



|        |      |              |       |      |       |       |
|--------|------|--------------|-------|------|-------|-------|
| P35579 | 785  | GFQACCBGYLAB | FALSE | TRUE | FALSE | 31.03 |
| P35579 | 786  | FQACCBGYLABK | FALSE | TRUE | FALSE | 22.8  |
| P35579 | 787  | QACCBGYLABKA | FALSE | TRUE | FALSE | 31.04 |
| P35579 | 788  | ACCBGYLABKAF | FALSE | TRUE | FALSE | 17.79 |
| P35579 | 789  | CCBGYLABKAF  | FALSE | TRUE | FALSE | 20.38 |
| P35579 | 795  | ABKAFKBQQQL  | FALSE | TRUE | FALSE | 10.78 |
| P35579 | 798  | AFAKBQQQLTAM | FALSE | TRUE | FALSE | 18.34 |
| P35579 | 837  | LLQVSBQEEEMM | FALSE | TRUE | FALSE | 13.07 |
| P35579 | 839  | QVSBQEEEMMAK | FALSE | TRUE | FALSE | 11.59 |
| P35579 | 840  | VSBQEEEMMAKE | FALSE | TRUE | FALSE | 14.65 |
| P35579 | 841  | SBQEEEMMAKEE | FALSE | TRUE | FALSE | 14.13 |
| P35579 | 857  | VBKQLAAENBL  | FALSE | TRUE | FALSE | 11.58 |
| P35579 | 858  | BEKQLAAENBLT | FALSE | TRUE | FALSE | 29.74 |
| P35579 | 896  | CAEAEELBABL  | FALSE | TRUE | FALSE | 10.76 |
| P35579 | 898  | EAEELBABLTA  | FALSE | TRUE | FALSE | 22.05 |
| P35579 | 900  | EELBABLTA    | FALSE | TRUE | FALSE | 11.48 |
| P35579 | 901  | ELBABLTA     | FALSE | TRUE | FALSE | 49.15 |
| P35579 | 902  | LBABLTA      | FALSE | TRUE | FALSE | 17.29 |
| P35579 | 903  | BABLTA       | FALSE | TRUE | FALSE | 25.82 |
| P35579 | 904  | ABLTA        | FALSE | TRUE | FALSE | 25.03 |
| P35579 | 955  | EESABQKLQLEK | FALSE | TRUE | FALSE | 14.83 |
| P35579 | 956  | ESABQKLQLEKV | FALSE | TRUE | FALSE | 16.9  |
| P35579 | 957  | SABQKLQLEKVT | FALSE | TRUE | FALSE | 10.5  |
| P35579 | 1030 | TDLEEBLBEEK  | FALSE | TRUE | FALSE | 10.47 |
| P35579 | 1032 | LEEBLBEEKQB  | FALSE | TRUE | FALSE | 15.15 |
| P35579 | 1033 | EEBLBEEKQBQ  | FALSE | TRUE | FALSE | 14.45 |
| P35579 | 1034 | EBLBEEKQBQE  | FALSE | TRUE | FALSE | 16.04 |
| P35579 | 1035 | BLBEEKQBQEL  | FALSE | TRUE | FALSE | 27.09 |
| P35579 | 1036 | LBBEEKQBQELE | FALSE | TRUE | FALSE | 19.87 |
| P35579 | 1037 | BBEEKQBQELEK | FALSE | TRUE | FALSE | 14.14 |
| P35579 | 1038 | BEEKQBQELEKT | FALSE | TRUE | FALSE | 14.57 |
| P35579 | 1039 | EEKQBQELEKT  | FALSE | TRUE | FALSE | 12.93 |
| P35579 | 1040 | EKQBQELEKTBB | FALSE | TRUE | FALSE | 20.46 |
| P35579 | 1042 | QBQELEKTBBKL | FALSE | TRUE | FALSE | 30.45 |
| P35579 | 1043 | BQELEKTBBKLE | FALSE | TRUE | FALSE | 44.56 |
| P35579 | 1044 | QELEKTBBKLEG | FALSE | TRUE | FALSE | 10.93 |
| P35579 | 1046 | LEKTBBKLEGDS | FALSE | TRUE | FALSE | 20.88 |
| P35579 | 1047 | EKTBBKLEGDST | FALSE | TRUE | FALSE | 13.77 |
| P35579 | 1048 | KTBBKLEGDSTD | FALSE | TRUE | FALSE | 16.82 |
| P35579 | 1049 | TBBKLEGDSTD  | FALSE | TRUE | FALSE | 16.7  |
| P35579 | 1121 | ESEBASBNKA   | FALSE | TRUE | FALSE | 15.53 |
| P35579 | 1122 | SEBASBNKA    | FALSE | TRUE | FALSE | 20.7  |
| P35579 | 1154 | STAAQQELBSKB | FALSE | TRUE | FALSE | 10.18 |
| P35579 | 1158 | QQELBSKBEQEV | FALSE | TRUE | FALSE | 12.37 |
| P35579 | 1160 | ELBSKBEQEVNI | FALSE | TRUE | FALSE | 11.74 |
| P35579 | 1161 | LBSKBEQEVNIL | FALSE | TRUE | FALSE | 21.49 |
| P35579 | 1185 | AQIQEMBQKHSQ | FALSE | TRUE | FALSE | 10.74 |
| P35579 | 1187 | IQEMBQKHSQAV | FALSE | TRUE | FALSE | 19.6  |
| P35579 | 1188 | QEMBQKHSQAVE | FALSE | TRUE | FALSE | 12.21 |
| P35579 | 1189 | EMBQKHSQAVEE | FALSE | TRUE | FALSE | 17.04 |
| P35579 | 1190 | MBQKHSQAVEEL | FALSE | TRUE | FALSE | 11.72 |
| P35579 | 1225 | EBGELANEVKVL | FALSE | TRUE | FALSE | 10.93 |

|        |      |               |       |      |       |       |
|--------|------|---------------|-------|------|-------|-------|
| P35579 | 1226 | BGELANEVKVLL  | FALSE | TRUE | FALSE | 12.27 |
| P35579 | 1317 | LQEENBQKLSLS  | FALSE | TRUE | FALSE | 11.17 |
| P35579 | 1318 | QEENBQKLSLST  | FALSE | TRUE | FALSE | 10.43 |
| P35579 | 1338 | KNSFBEQLEEEEE | FALSE | TRUE | FALSE | 16.98 |
| P35579 | 1340 | SFBEQLEEEEEEA | FALSE | TRUE | FALSE | 16.85 |
| P35579 | 1341 | FBEQLEEEEEAAK | FALSE | TRUE | FALSE | 13.04 |
| P35579 | 1393 | DLEGLSQBHEEK  | FALSE | TRUE | FALSE | 10.19 |
| P35579 | 1394 | LEGLSQBHEEKV  | FALSE | TRUE | FALSE | 13.59 |
| P35579 | 1395 | EGLSQBHEEKVA  | FALSE | TRUE | FALSE | 11.17 |
| P35579 | 1396 | GLSQBHEEKVAA  | FALSE | TRUE | FALSE | 11.81 |
| P35579 | 1397 | LSQBHEEKVAAY  | FALSE | TRUE | FALSE | 25.38 |
| P35579 | 1398 | SQBHEEKVAAYD  | FALSE | TRUE | FALSE | 19.13 |
| P35579 | 1399 | QBHEEKVAAYDK  | FALSE | TRUE | FALSE | 21.12 |
| P35579 | 1400 | BHEEKVAAYDKL  | FALSE | TRUE | FALSE | 11.28 |
| P35579 | 1414 | TKTBLQQELDDL  | FALSE | TRUE | FALSE | 18.54 |
| P35579 | 1415 | KTBLQQELDDL   | FALSE | TRUE | FALSE | 11.84 |
| P35579 | 1429 | LDHQBQSACNLE  | FALSE | TRUE | FALSE | 11.27 |
| P35579 | 1430 | DHQBQSACNLEK  | FALSE | TRUE | FALSE | 14.49 |
| P35579 | 1472 | BEKETKALSLAB  | FALSE | TRUE | FALSE | 12.21 |
| P35579 | 1497 | BLNKQFBTEMED  | FALSE | TRUE | FALSE | 13.18 |
| P35579 | 1565 | MKAQFEBDLQGB  | FALSE | TRUE | FALSE | 18.96 |
| P35579 | 1566 | KAQFEBDLQGBD  | FALSE | TRUE | FALSE | 17.66 |
| P35579 | 1567 | AQFEBDLQGBDE  | FALSE | TRUE | FALSE | 12.71 |
| P35579 | 1568 | QFEBDLQGBDEQ  | FALSE | TRUE | FALSE | 10.7  |
| P35579 | 1569 | FEBDLQGBDEQS  | FALSE | TRUE | FALSE | 10.64 |
| P35579 | 1586 | QLVBQVBEMEA   | FALSE | TRUE | FALSE | 16.17 |
| P35579 | 1587 | LVBQVBEMEAEL  | FALSE | TRUE | FALSE | 14.27 |
| P35579 | 1588 | VBQVBEMEAELE  | FALSE | TRUE | FALSE | 15.77 |
| P35579 | 1589 | BQVBEMEAILED  | FALSE | TRUE | FALSE | 10.64 |
| P35579 | 1601 | EBKQBSMAVAAB  | FALSE | TRUE | FALSE | 12.57 |
| P35579 | 1650 | CMBELDDTBASB  | FALSE | TRUE | FALSE | 20.65 |
| P35579 | 1651 | MBELDDTBASBE  | FALSE | TRUE | FALSE | 27.4  |
| P35579 | 1652 | BELDDTBASBEE  | FALSE | TRUE | FALSE | 16.12 |
| P35579 | 1653 | ELDDTBASBEEI  | FALSE | TRUE | FALSE | 16.59 |
| P35579 | 1654 | LDDTBASBEEIL  | FALSE | TRUE | FALSE | 24.78 |
| P35579 | 1655 | DDTBASBEEILA  | FALSE | TRUE | FALSE | 18.5  |
| P35579 | 1656 | DTBASBEEILAQ  | FALSE | TRUE | FALSE | 30.46 |
| P35579 | 1658 | BASBEEILAQAK  | FALSE | TRUE | FALSE | 26.27 |
| P35579 | 1659 | ASBEEILAQAKE  | FALSE | TRUE | FALSE | 19.04 |
| P35579 | 1660 | SBEEILAQAKEN  | FALSE | TRUE | FALSE | 11.3  |
| P35579 | 1690 | AAAEBAKBQAQQ  | FALSE | TRUE | FALSE | 11.08 |
| P35579 | 1691 | AAEBAKBQAQQE  | FALSE | TRUE | FALSE | 15.92 |
| P35579 | 1692 | AEBAKBQAQQEB  | FALSE | TRUE | FALSE | 14.05 |
| P35579 | 1693 | EBAKBQAQQEBD  | FALSE | TRUE | FALSE | 18.08 |
| P35579 | 1694 | BAKBQAQQEBDE  | FALSE | TRUE | FALSE | 19.37 |
| P35579 | 1695 | AKBQAQQEBDEL  | FALSE | TRUE | FALSE | 26.52 |
| P35579 | 1696 | KBQAQQEBDELA  | FALSE | TRUE | FALSE | 12.95 |
| P35579 | 1697 | BQAQQEBDELAD  | FALSE | TRUE | FALSE | 10.45 |
| P35579 | 1720 | ALEEKBBLEABI  | FALSE | TRUE | FALSE | 10.05 |
| P35579 | 1723 | EKBBLEABIAQL  | FALSE | TRUE | FALSE | 10.63 |
| P35579 | 1726 | BLEABIAQLEEE  | FALSE | TRUE | FALSE | 13.34 |
| P35579 | 1727 | LEABIAQLEEEL  | FALSE | TRUE | FALSE | 12.95 |

|        |      |               |       |      |       |       |
|--------|------|---------------|-------|------|-------|-------|
| P35579 | 1769 | EBSHAQKNENAB  | FALSE | TRUE | FALSE | 12.12 |
| P35579 | 1770 | BSHAQKNENABQ  | FALSE | TRUE | FALSE | 18.59 |
| P35579 | 1774 | QKNENABQQLEB  | FALSE | TRUE | FALSE | 11.35 |
| P35579 | 1775 | KNENABQQLEBQ  | FALSE | TRUE | FALSE | 13.38 |
| P35579 | 1776 | NENABQQLEBQN  | FALSE | TRUE | FALSE | 10.91 |
| P35579 | 1777 | ENABQQLEBQNK  | FALSE | TRUE | FALSE | 29.82 |
| P35579 | 1778 | NABQQLEBQNKE  | FALSE | TRUE | FALSE | 32.22 |
| P35579 | 1779 | ABQQLEBQNKEL  | FALSE | TRUE | FALSE | 33.06 |
| P35579 | 1780 | BQQLEBQNKELK  | FALSE | TRUE | FALSE | 16.17 |
| P35579 | 1829 | EBQAACKQVBBT  | FALSE | TRUE | FALSE | 21.21 |
| P35579 | 1830 | BQAACKQVBBTE  | FALSE | TRUE | FALSE | 27.4  |
| P35579 | 1831 | QAACKQVBBTEK  | FALSE | TRUE | FALSE | 11.88 |
| P35579 | 1853 | DEBBNAEQYKDQ  | FALSE | TRUE | FALSE | 11.6  |
| P35579 | 1855 | BBNAEQYKDQAD  | FALSE | TRUE | FALSE | 21.07 |
| P35579 | 1870 | TBLKQLKBQLEE  | FALSE | TRUE | FALSE | 25.45 |
| P35579 | 1874 | QLKBQLEEAEEE  | FALSE | TRUE | FALSE | 10.23 |
| P35579 | 1885 | EAQBANASBBKL  | FALSE | TRUE | FALSE | 20.26 |
| P35579 | 1887 | QBANASBBKLQB  | FALSE | TRUE | FALSE | 22.97 |
| P35579 | 1888 | BANASBBKLQBE  | FALSE | TRUE | FALSE | 31.36 |
| P35579 | 1889 | ANASBBKLQBEL  | FALSE | TRUE | FALSE | 20.54 |
| P35579 | 1890 | NASBBKLQBELE  | FALSE | TRUE | FALSE | 20.72 |
| P35579 | 1891 | ASBBKLQBELED  | FALSE | TRUE | FALSE | 20.01 |
| P35579 | 1892 | SBBKLQBELEDA  | FALSE | TRUE | FALSE | 17.63 |
| P35579 | 1893 | BBKLQBELEDAT  | FALSE | TRUE | FALSE | 13.07 |
| P35579 | 1894 | BKLQBELEDATE  | FALSE | TRUE | FALSE | 13.78 |
| P35579 | 1916 | SLKNKLBBGDLP  | FALSE | TRUE | FALSE | 11.55 |
| P35579 | 1919 | NKLBBGDLPFVV  | FALSE | TRUE | FALSE | 24.46 |
| P35579 | 1920 | KLBBGDLPFVVP  | FALSE | TRUE | FALSE | 10.43 |
| P35579 | 1931 | PBBMABKGAGDG  | FALSE | TRUE | FALSE | 11.07 |
| P35579 | 1932 | BBMABKGAGDGS  | FALSE | TRUE | FALSE | 27.85 |
| P35579 | 1933 | BMABKGAGDGSD  | FALSE | TRUE | FALSE | 25.66 |
| P35579 | 1934 | MABKGAGDGSDE  | FALSE | TRUE | FALSE | 12.49 |
| P35579 | 1935 | ABKGAGDGSDEE  | FALSE | TRUE | FALSE | 10.42 |
| P14598 | 6    | IBHIALLGFEKB  | FALSE | TRUE | FALSE | 13.62 |
| P14598 | 11   | LLGFEKBFVPSQ  | FALSE | TRUE | FALSE | 15.87 |
| P14598 | 12   | LGFEKBFVPSQH  | FALSE | TRUE | FALSE | 21.93 |
| P14598 | 13   | GFEKBFVPSQHY  | FALSE | TRUE | FALSE | 22.67 |
| P14598 | 14   | FEKBFVPSQHYY  | FALSE | TRUE | FALSE | 18.62 |
| P14598 | 32   | WQDLSEKVVYBB  | FALSE | TRUE | FALSE | 10.38 |
| P14598 | 35   | LSEKVVYBBFTE  | FALSE | TRUE | FALSE | 16.45 |
| P14598 | 36   | SEKVVYBBFTEI  | FALSE | TRUE | FALSE | 20.37 |
| P14598 | 79   | KWFDGQBAAENB  | FALSE | TRUE | FALSE | 10.18 |
| P14598 | 80   | WFDGQBAAENBQ  | FALSE | TRUE | FALSE | 12.33 |
| P14598 | 81   | FDGQBAAENBQG  | FALSE | TRUE | FALSE | 10.41 |
| P14598 | 82   | DGQBAAENBQGT  | FALSE | TRUE | FALSE | 14.59 |
| P14598 | 83   | GQBAAENBQGTL  | FALSE | TRUE | FALSE | 31.58 |
| P14598 | 84   | QBAAENBQGTLT  | FALSE | TRUE | FALSE | 37.6  |
| P14598 | 85   | BAAENBQGTLTE  | FALSE | TRUE | FALSE | 29.98 |
| P14598 | 86   | AAENBQGTLTEY  | FALSE | TRUE | FALSE | 22.22 |
| P14598 | 87   | AENBQGTLTEYCY | FALSE | TRUE | FALSE | 16.13 |
| P14598 | 88   | ENBQGTLTEYCG  | FALSE | TRUE | FALSE | 18.25 |
| P14598 | 89   | NBQGTLTEYCGT  | FALSE | TRUE | FALSE | 15.98 |

|        |     |              |       |      |       |       |
|--------|-----|--------------|-------|------|-------|-------|
| P14598 | 158 | LQTYBAIANYEK | FALSE | TRUE | FALSE | 10.1  |
| P14598 | 160 | TYBAIANYEKTS | FALSE | TRUE | FALSE | 11.71 |
| P14598 | 161 | YBAIANYEKTSG | FALSE | TRUE | FALSE | 10.15 |
| P14598 | 200 | AKBGWIPASFLE | FALSE | TRUE | FALSE | 13.16 |
| P14598 | 201 | KBGWIPASFLEP | FALSE | TRUE | FALSE | 13.81 |
| P14598 | 285 | QDVSQAQBQIKB | FALSE | TRUE | FALSE | 25.47 |
| P14598 | 286 | DVSQAQBQIKBG | FALSE | TRUE | FALSE | 25.99 |
| P14598 | 288 | SQAQBQIKBGAP | FALSE | TRUE | FALSE | 17.09 |
| P14598 | 289 | QAQBQIKBGAPP | FALSE | TRUE | FALSE | 21.86 |
| P14598 | 290 | AQBQIKBGAPPB | FALSE | TRUE | FALSE | 23.11 |
| P14598 | 291 | QBQIKBGAPPBB | FALSE | TRUE | FALSE | 18.41 |
| P14598 | 292 | BQIKBGAPPBBS | FALSE | TRUE | FALSE | 29.99 |
| P14598 | 293 | QIKBGAPPBBSS | FALSE | TRUE | FALSE | 23.76 |
| P14598 | 294 | IKBGAPPBBSSI | FALSE | TRUE | FALSE | 28.11 |
| P14598 | 295 | KBGAPPBBSSIB | FALSE | TRUE | FALSE | 26.57 |
| P14598 | 296 | BGAPPBBSSIBN | FALSE | TRUE | FALSE | 61.12 |
| P14598 | 297 | GAPPBBSSIBNA | FALSE | TRUE | FALSE | 32.58 |
| P14598 | 298 | APPBBSSIBNAH | FALSE | TRUE | FALSE | 14.01 |
| P14598 | 299 | PPBBSSIBNAHS | FALSE | TRUE | FALSE | 14.13 |
| P14598 | 305 | IBNAHSIHQBSB | FALSE | TRUE | FALSE | 14.87 |
| P14598 | 309 | HSIHQBSBKBL  | FALSE | TRUE | FALSE | 15.63 |
| P14598 | 310 | SIHQBSBKBLSQ | FALSE | TRUE | FALSE | 24.67 |
| P14598 | 311 | IHQBSBKBLSQD | FALSE | TRUE | FALSE | 47.3  |
| P14598 | 312 | HQBSBKBLSQDA | FALSE | TRUE | FALSE | 56.04 |
| P14598 | 313 | QBSBKBLSQDAY | FALSE | TRUE | FALSE | 63.87 |
| P14598 | 314 | BSBKBLSQDAYB | FALSE | TRUE | FALSE | 38.25 |
| P14598 | 315 | SBKBLSQDAYBB | FALSE | TRUE | FALSE | 21.53 |
| P14598 | 316 | BKBLSQDAYBBN | FALSE | TRUE | FALSE | 12.02 |
| P14598 | 317 | KBLSQDAYBBNS | FALSE | TRUE | FALSE | 11.92 |
| P14598 | 318 | BLSQDAYBBNSV | FALSE | TRUE | FALSE | 43.57 |
| P14598 | 319 | LSQDAYBBNSVB | FALSE | TRUE | FALSE | 34.66 |
| P14598 | 320 | SQDAYBBNSVBF | FALSE | TRUE | FALSE | 30.32 |
| P14598 | 321 | QDAYBBNSVBFL | FALSE | TRUE | FALSE | 16.06 |
| P14598 | 322 | DAYBBNSVBFLQ | FALSE | TRUE | FALSE | 16.05 |
| P14598 | 324 | YBNSVBFLQQB  | FALSE | TRUE | FALSE | 15.33 |
| P14598 | 325 | BBNSVBFLQQBB | FALSE | TRUE | FALSE | 17.46 |
| P14598 | 327 | NSVBFLQQBBBQ | FALSE | TRUE | FALSE | 11    |
| P14598 | 328 | SVBFLQQBBBQA | FALSE | TRUE | FALSE | 11.33 |
| P14598 | 330 | BFLQQBBBQABP | FALSE | TRUE | FALSE | 26.62 |
| P14598 | 331 | FLQQBBBQABPG | FALSE | TRUE | FALSE | 25.47 |
| P14598 | 332 | LQQBBBQABPGP | FALSE | TRUE | FALSE | 31.28 |
| P14598 | 333 | QQBBBQABPGPQ | FALSE | TRUE | FALSE | 36.43 |
| P14598 | 334 | QBBBQABPGPQS | FALSE | TRUE | FALSE | 40.86 |
| P14598 | 335 | BBBQABPGPQSP | FALSE | TRUE | FALSE | 33.45 |
| P14598 | 336 | BBQABPGPQSPG | FALSE | TRUE | FALSE | 30.88 |
| P14598 | 337 | BQABPGPQSPGS | FALSE | TRUE | FALSE | 13.8  |
| P14598 | 350 | LEEEBQTQBSKP | FALSE | TRUE | FALSE | 14.29 |
| P14598 | 351 | EEEBQTQBSKPQ | FALSE | TRUE | FALSE | 13.6  |
| P14598 | 352 | EEBQTQBSKPQP | FALSE | TRUE | FALSE | 15.69 |
| P14598 | 353 | EBQTQBSKPQPA | FALSE | TRUE | FALSE | 24.41 |
| P14598 | 373 | LILNBCSESTKB | FALSE | TRUE | FALSE | 20.13 |
| P62937 | 59  | GFMCQGGDFTBH | FALSE | TRUE | FALSE | 15.08 |

|        |     |               |       |      |       |       |
|--------|-----|---------------|-------|------|-------|-------|
| P62937 | 61  | MCQGGDFTBHNG  | FALSE | TRUE | FALSE | 10.28 |
| P62937 | 62  | CQGGDFTBHNGT  | FALSE | TRUE | FALSE | 13.14 |
| P62937 | 63  | QGGDFTBHNGTG  | FALSE | TRUE | FALSE | 15.43 |
| P62937 | 64  | GGDFTBHNGTGG  | FALSE | TRUE | FALSE | 10.46 |
| P62937 | 65  | GDFTBHNGTGGK  | FALSE | TRUE | FALSE | 11.4  |
| P62937 | 66  | DFTBHNGTGGKS  | FALSE | TRUE | FALSE | 11.19 |
| P62937 | 137 | NIVEAMEBFGSB  | FALSE | TRUE | FALSE | 11.43 |
| P62937 | 138 | IVEAMEBFGSBN  | FALSE | TRUE | FALSE | 19    |
| P62937 | 139 | VEAMEBFGSBNG  | FALSE | TRUE | FALSE | 22.83 |
| P62937 | 140 | EAMEBFGSBNGK  | FALSE | TRUE | FALSE | 28.95 |
| P62937 | 141 | AMEBFGSBNGKT  | FALSE | TRUE | FALSE | 39.43 |
| P62937 | 142 | MEBFGSBNGKTS  | FALSE | TRUE | FALSE | 36.29 |
| P00747 | 61  | CBAFQYHSKEQQ  | FALSE | TRUE | FALSE | 15.47 |
| P00747 | 80  | BKSSIIIBMDV   | FALSE | TRUE | FALSE | 11.86 |
| P00747 | 81  | KSSIIIBMDVV   | FALSE | TRUE | FALSE | 14.46 |
| P00747 | 82  | SSIIIBMDVVL   | FALSE | TRUE | FALSE | 10.54 |
| P00747 | 85  | IIBMDVVLFEK   | FALSE | TRUE | FALSE | 10.1  |
| P00747 | 105 | TGNGKNYBGTMS  | FALSE | TRUE | FALSE | 10.41 |
| P00747 | 133 | HBPBFSPATHPS  | FALSE | TRUE | FALSE | 11.15 |
| P00747 | 161 | GPWCYTDDPEKB  | FALSE | TRUE | FALSE | 10.87 |
| P00747 | 231 | KNYCBNPDBELB  | FALSE | TRUE | FALSE | 15.99 |
| P00747 | 250 | PNKBWELCDIPB  | FALSE | TRUE | FALSE | 10.45 |
| P00747 | 252 | KBWELCDIPBCT  | FALSE | TRUE | FALSE | 11.79 |
| P00747 | 273 | YQCLKGTGENYB  | FALSE | TRUE | FALSE | 11.22 |
| P00747 | 274 | QCLKGTGENYBG  | FALSE | TRUE | FALSE | 15.11 |
| P00747 | 276 | LKGTGENYBGNV  | FALSE | TRUE | FALSE | 10.59 |
| P00747 | 278 | GTGENYBGNVAV  | FALSE | TRUE | FALSE | 13.07 |
| P00747 | 279 | TGENYBGNVAVT  | FALSE | TRUE | FALSE | 12.97 |
| P00747 | 323 | YCBNPDGKBAPW  | FALSE | TRUE | FALSE | 10.16 |
| P00747 | 377 | CYHGDGQSYBGT  | FALSE | TRUE | FALSE | 19.2  |
| P00747 | 378 | YHGDGQSYBGTS  | FALSE | TRUE | FALSE | 22.06 |
| P00747 | 379 | HGDGQSYBGTSS  | FALSE | TRUE | FALSE | 28.34 |
| P00747 | 380 | GDGQSYBGTSSST | FALSE | TRUE | FALSE | 32.91 |
| P00747 | 381 | DGQSYBGTSSSTT | FALSE | TRUE | FALSE | 33.38 |
| P00747 | 382 | GQSYBGTSSSTTT | FALSE | TRUE | FALSE | 32.37 |
| P00747 | 383 | QSYBGTSSSTTTT | FALSE | TRUE | FALSE | 36.24 |
| P00747 | 384 | SYBGTSSSTTTTG | FALSE | TRUE | FALSE | 29.39 |
| P00747 | 403 | SMTPHBHQKTPE  | FALSE | TRUE | FALSE | 14.63 |
| P00747 | 404 | MTPHBHQKTPEN  | FALSE | TRUE | FALSE | 14.19 |
| P00747 | 479 | EDCMFGNGKGYB  | FALSE | TRUE | FALSE | 12.38 |
| P00747 | 480 | DCMFGNGKGYBG  | FALSE | TRUE | FALSE | 16.74 |
| P00747 | 485 | NGKGYBGKBATT  | FALSE | TRUE | FALSE | 10.62 |
| P00747 | 488 | GYBGKBATTVTG  | FALSE | TRUE | FALSE | 15.82 |
| P00747 | 489 | YBGKBATTVTGT  | FALSE | TRUE | FALSE | 21.5  |
| P00747 | 490 | BGKBATTVTGTP  | FALSE | TRUE | FALSE | 12.14 |
| P00747 | 509 | EPHBHSIFTPET  | FALSE | TRUE | FALSE | 11.67 |
| P00747 | 511 | HBHSIFTPETNP  | FALSE | TRUE | FALSE | 13.39 |
| P00747 | 512 | BHSIFTPETNPB  | FALSE | TRUE | FALSE | 10.32 |
| P00747 | 521 | NPBAGLEKNYCB  | FALSE | TRUE | FALSE | 11.85 |
| P00747 | 522 | PBAGLEKNYCBN  | FALSE | TRUE | FALSE | 12    |
| P00747 | 523 | BAGLEKNYCBNP  | FALSE | TRUE | FALSE | 16.06 |
| P00747 | 590 | HSWPWQVSLBTB  | FALSE | TRUE | FALSE | 18.16 |

|        |     |              |       |      |       |       |
|--------|-----|--------------|-------|------|-------|-------|
| P00747 | 595 | QVSLBTBFGMHF | FALSE | TRUE | FALSE | 10.56 |
| P00747 | 597 | SLBTBFGMHFCG | FALSE | TRUE | FALSE | 10.03 |
| P00747 | 598 | LBTBFGMHFCGG | FALSE | TRUE | FALSE | 10.57 |
| P00747 | 599 | BTBFGMHFCGGT | FALSE | TRUE | FALSE | 14.38 |
| P00747 | 653 | EVSBLFLEPTBK | FALSE | TRUE | FALSE | 12.33 |
| P00747 | 654 | VSBLFLEPTBKD | FALSE | TRUE | FALSE | 15.25 |
| P00747 | 655 | SBLFLEPTBKDI | FALSE | TRUE | FALSE | 18.45 |
| P00747 | 727 | KVCNBYEFLNGB | FALSE | TRUE | FALSE | 15.01 |
| P00747 | 728 | VCNBYEFLNGBV | FALSE | TRUE | FALSE | 14.19 |
| P00747 | 729 | CNBYEFLNGBVQ | FALSE | TRUE | FALSE | 12.67 |
| P00747 | 730 | NBYEFLNGBVQS | FALSE | TRUE | FALSE | 17.14 |
| P00747 | 731 | BYEFLNGBVQST | FALSE | TRUE | FALSE | 25.18 |
| P00747 | 732 | YEFLNGBVQSTE | FALSE | TRUE | FALSE | 11.52 |
| P00747 | 733 | EFLNGBVQSTEL | FALSE | TRUE | FALSE | 11.66 |
| P11940 | 38  | LSIBVCBDMITB | FALSE | TRUE | FALSE | 17.12 |
| P11940 | 39  | SIBVCBDMITBB | FALSE | TRUE | FALSE | 17.51 |
| P11940 | 40  | IBVCBDMITBBS | FALSE | TRUE | FALSE | 27.49 |
| P11940 | 41  | BVCBDMITBBSL | FALSE | TRUE | FALSE | 26.77 |
| P11940 | 42  | VCBDMITBBSLG | FALSE | TRUE | FALSE | 25.52 |
| P11940 | 43  | CBDMITBBSLGY | FALSE | TRUE | FALSE | 26.57 |
| P11940 | 44  | BDMITBBSLGYA | FALSE | TRUE | FALSE | 24.59 |
| P11940 | 45  | DMITBBSLGYAY | FALSE | TRUE | FALSE | 15.7  |
| P11940 | 82  | VBIMWSQBDSL  | FALSE | TRUE | FALSE | 11.27 |
| P11940 | 83  | BIMWSQBDSL   | FALSE | TRUE | FALSE | 22.31 |
| P11940 | 84  | IMWSQBDSL    | FALSE | TRUE | FALSE | 15.16 |
| P11940 | 85  | MWSQBDSL     | FALSE | TRUE | FALSE | 17.02 |
| P11940 | 86  | WSQBDSL      | FALSE | TRUE | FALSE | 19.85 |
| P11940 | 87  | SQBDSL       | FALSE | TRUE | FALSE | 15.01 |
| P11940 | 88  | QBDPSL       | FALSE | TRUE | FALSE | 15.81 |
| P11940 | 161 | MLLNDBKVFVGB | FALSE | TRUE | FALSE | 11.33 |
| P11940 | 168 | VFVGBFKSBKEB | FALSE | TRUE | FALSE | 24.64 |
| P11940 | 169 | FVGBFKSBKEBE | FALSE | TRUE | FALSE | 51.19 |
| P11940 | 170 | VGBFKSBKEBEA | FALSE | TRUE | FALSE | 39.34 |
| P11940 | 171 | GBFKSBKEBEAE | FALSE | TRUE | FALSE | 49.71 |
| P11940 | 172 | BFKSBKEBEAEL | FALSE | TRUE | FALSE | 61.77 |
| P11940 | 173 | FKSBKEBEAELG | FALSE | TRUE | FALSE | 51.14 |
| P11940 | 174 | KSBKEBEAELGA | FALSE | TRUE | FALSE | 26.34 |
| P11940 | 175 | SBKEBEAELGAB | FALSE | TRUE | FALSE | 15.8  |
| P11940 | 176 | BKEBEAELGABA | FALSE | TRUE | FALSE | 11.65 |
| P11940 | 177 | KEBEAELGABAK | FALSE | TRUE | FALSE | 13.1  |
| P11940 | 179 | BEAELGABAKEF | FALSE | TRUE | FALSE | 22.41 |
| P11940 | 182 | ELGABAKEFTNV | FALSE | TRUE | FALSE | 14.23 |
| P11940 | 183 | LGABAKEFTNVY | FALSE | TRUE | FALSE | 17.53 |
| P11940 | 235 | FVSFEBHEDAQK | FALSE | TRUE | FALSE | 11.71 |
| P11940 | 237 | SFEBHEDAQKAV | FALSE | TRUE | FALSE | 11.58 |
| P11940 | 238 | FEBHEDAQKAVD | FALSE | TRUE | FALSE | 12.12 |
| P11940 | 260 | QIYVGBAQKKVE | FALSE | TRUE | FALSE | 22.16 |
| P11940 | 261 | IYVGBAQKKVEB | FALSE | TRUE | FALSE | 19.47 |
| P11940 | 262 | YVGBAQKKVEBQ | FALSE | TRUE | FALSE | 24.47 |
| P11940 | 264 | GBAQKKVEBQTE | FALSE | TRUE | FALSE | 20.04 |
| P11940 | 265 | BAQKKVEBQTEL | FALSE | TRUE | FALSE | 13.11 |
| P11940 | 270 | VEBQTELBKFE  | FALSE | TRUE | FALSE | 25.61 |

|        |     |              |       |      |       |       |
|--------|-----|--------------|-------|------|-------|-------|
| P11940 | 271 | EBQTELKBFQEQ | FALSE | TRUE | FALSE | 31.4  |
| P11940 | 272 | BQTELKBFQEQM | FALSE | TRUE | FALSE | 17.56 |
| P11940 | 280 | FEQMKQDBITBY | FALSE | TRUE | FALSE | 21.33 |
| P11940 | 281 | EQMKQDBITBYQ | FALSE | TRUE | FALSE | 16.37 |
| P11940 | 282 | QMKQDBITBYQG | FALSE | TRUE | FALSE | 19.13 |
| P11940 | 283 | MKQDBITBYQGV | FALSE | TRUE | FALSE | 25.9  |
| P11940 | 284 | KQDBITBYQGVN | FALSE | TRUE | FALSE | 16.12 |
| P11940 | 285 | QDBITBYQGVNL | FALSE | TRUE | FALSE | 24.92 |
| P11940 | 286 | DBITBYQGVNLY | FALSE | TRUE | FALSE | 12.62 |
| P11940 | 308 | EBLBKEFSPFGT | FALSE | TRUE | FALSE | 10.27 |
| P11940 | 364 | YVALAQBKEEBQ | FALSE | TRUE | FALSE | 13.99 |
| P11940 | 366 | ALAQBKEEBQAH | FALSE | TRUE | FALSE | 15.14 |
| P11940 | 367 | LAQBKEEBQAHL | FALSE | TRUE | FALSE | 21.93 |
| P11940 | 368 | AQBKEEBQAHLT | FALSE | TRUE | FALSE | 25.18 |
| P11940 | 369 | QBKEEBQAHLTN | FALSE | TRUE | FALSE | 23.24 |
| P11940 | 370 | BKEEBQAHLTNQ | FALSE | TRUE | FALSE | 23.94 |
| P11940 | 371 | KEEBQAHLTNQY | FALSE | TRUE | FALSE | 10.12 |
| P11940 | 372 | EEBQAHLTNQYM | FALSE | TRUE | FALSE | 10.71 |
| P11940 | 373 | EBQAHLTNQYMQ | FALSE | TRUE | FALSE | 15.18 |
| P11940 | 374 | BQAHLTNQYMQB | FALSE | TRUE | FALSE | 37.3  |
| P11940 | 375 | QAHLTNQYMQBM | FALSE | TRUE | FALSE | 16.06 |
| P11940 | 377 | HLTNQYMQBMAS | FALSE | TRUE | FALSE | 13.24 |
| P11940 | 378 | LTNQYMQBMASV | FALSE | TRUE | FALSE | 31.65 |
| P11940 | 379 | TNQYMQBMASVB | FALSE | TRUE | FALSE | 37.94 |
| P11940 | 380 | NQYMQBMASVBA | FALSE | TRUE | FALSE | 24.08 |
| P11940 | 381 | QYMQBMASVBAV | FALSE | TRUE | FALSE | 29.4  |
| P11940 | 383 | MQBMASVBAVPN | FALSE | TRUE | FALSE | 13.98 |
| P11940 | 384 | QBMASVBAVNP  | FALSE | TRUE | FALSE | 24.35 |
| P11940 | 385 | BMASVBAVNPV  | FALSE | TRUE | FALSE | 16.58 |
| P11940 | 411 | AAIPQTQNBAAY | FALSE | TRUE | FALSE | 12.32 |
| P11940 | 412 | AIPQTQNBAAYY | FALSE | TRUE | FALSE | 12.19 |
| P11940 | 413 | IPQTQNBAAYYP | FALSE | TRUE | FALSE | 20    |
| P11940 | 414 | PQTQNBAAYYPP | FALSE | TRUE | FALSE | 13.06 |
| P11940 | 415 | QTQNBAAYYPPS | FALSE | TRUE | FALSE | 35.64 |
| P11940 | 416 | TQNBAAYYPPSQ | FALSE | TRUE | FALSE | 39.15 |
| P11940 | 417 | QNBAAYYPPSQI | FALSE | TRUE | FALSE | 33.64 |
| P11940 | 418 | NBAAYYPPSQIA | FALSE | TRUE | FALSE | 10.55 |
| P11940 | 426 | SQIAQLBPSPBW | FALSE | TRUE | FALSE | 10.61 |
| P11940 | 427 | QIAQLBPSPBWT | FALSE | TRUE | FALSE | 10.42 |
| P11940 | 429 | AQLBPSPBWTAQ | FALSE | TRUE | FALSE | 11.91 |
| P11940 | 430 | QLBPSPBWTAQG | FALSE | TRUE | FALSE | 14.65 |
| P11940 | 431 | LBPSPBWTAQGA | FALSE | TRUE | FALSE | 10.99 |
| P11940 | 432 | BPSPBWTAQGAB | FALSE | TRUE | FALSE | 17.33 |
| P11940 | 433 | PSPBWTAQGABP | FALSE | TRUE | FALSE | 10.61 |
| P11940 | 434 | SPBWTAQGABPH | FALSE | TRUE | FALSE | 14.55 |
| P11940 | 435 | PBWTAQGABPHP | FALSE | TRUE | FALSE | 13.49 |
| P11940 | 513 | YAAGVBNPQQHL | FALSE | TRUE | FALSE | 13.7  |
| P11940 | 515 | AGVBNPQQHLNA | FALSE | TRUE | FALSE | 10.81 |
| P11940 | 516 | GVBNPQQHLNAQ | FALSE | TRUE | FALSE | 14.26 |
| P07737 | 126 | KKCYEMASHLBB | FALSE | TRUE | FALSE | 10.73 |
| P07737 | 127 | KCYEMASHLBBS | FALSE | TRUE | FALSE | 13.87 |
| P07737 | 128 | CYEMASHLBBSQ | FALSE | TRUE | FALSE | 13.91 |

|        |     |              |       |      |       |       |
|--------|-----|--------------|-------|------|-------|-------|
| P07737 | 129 | YEMASHLBBSQY | FALSE | TRUE | FALSE | 14.28 |
| Q05655 | 34  | EALSTEBGKTLV | FALSE | TRUE | FALSE | 11.12 |
| Q05655 | 35  | ALSTEBGKTLVQ | FALSE | TRUE | FALSE | 12.47 |
| Q05655 | 56  | KSTFDAHIYEGB | FALSE | TRUE | FALSE | 12.04 |
| Q05655 | 135 | DEAKFPTMNBBG | FALSE | TRUE | FALSE | 13.38 |
| Q05655 | 136 | EAKFPTMNBBGA | FALSE | TRUE | FALSE | 17    |
| Q05655 | 137 | AKFPTMNBBGAI | FALSE | TRUE | FALSE | 15.37 |
| Q05655 | 138 | KFPTMNBBGAIK | FALSE | TRUE | FALSE | 13.57 |
| Q05655 | 139 | FPTMNBBGAIKQ | FALSE | TRUE | FALSE | 30.37 |
| Q05655 | 140 | PTMNBBGAIKQA | FALSE | TRUE | FALSE | 20.98 |
| Q05655 | 141 | TMNBBGAIKQAK | FALSE | TRUE | FALSE | 12.93 |
| Q05655 | 142 | MNBBGAIKQAKI | FALSE | TRUE | FALSE | 14.69 |
| Q05655 | 143 | NBBGAIKQAKIH | FALSE | TRUE | FALSE | 13.44 |
| Q05655 | 144 | BBGAIKQAKIHY | FALSE | TRUE | FALSE | 12.42 |
| Q05655 | 185 | QGYKCBQCNAAI | FALSE | TRUE | FALSE | 20.41 |
| Q05655 | 186 | GYKCBQCNAAIH | FALSE | TRUE | FALSE | 18.23 |
| Q05655 | 200 | CIDKIIGBCTGT | FALSE | TRUE | FALSE | 10.04 |
| Q05655 | 204 | IIGBCTGTAANS | FALSE | TRUE | FALSE | 12.03 |
| Q05655 | 205 | IGBCTGTAANSB | FALSE | TRUE | FALSE | 20.11 |
| Q05655 | 206 | GBCTGTAANSBD | FALSE | TRUE | FALSE | 13.9  |
| Q05655 | 209 | TGTAANSBDTIF | FALSE | TRUE | FALSE | 10.03 |
| Q05655 | 210 | GTAANSBDTIFQ | FALSE | TRUE | FALSE | 10.75 |
| Q05655 | 213 | ANSBDTIFQKEB | FALSE | TRUE | FALSE | 18.08 |
| Q05655 | 214 | NSBDTIFQKEBF | FALSE | TRUE | FALSE | 14.94 |
| Q05655 | 215 | SBDTIFQKEBFN | FALSE | TRUE | FALSE | 21.14 |
| Q05655 | 216 | BDTIFQKEBFNI | FALSE | TRUE | FALSE | 11.79 |
| Q05655 | 289 | EALNQVTQBASB | FALSE | TRUE | FALSE | 15.89 |
| Q05655 | 290 | ALNQVTQBASBB | FALSE | TRUE | FALSE | 24.74 |
| Q05655 | 291 | LNQVTQBASBBS | FALSE | TRUE | FALSE | 40.8  |
| Q05655 | 292 | NQVTQBASBBSB | FALSE | TRUE | FALSE | 39.08 |
| Q05655 | 293 | QVTQBASBBSDS | FALSE | TRUE | FALSE | 43.4  |
| Q05655 | 294 | VTQBASBBSDSA | FALSE | TRUE | FALSE | 35.77 |
| Q05655 | 295 | TQBASBBSDSAS | FALSE | TRUE | FALSE | 26.11 |
| Q05655 | 296 | QBASBBSDSASS | FALSE | TRUE | FALSE | 31.21 |
| Q05655 | 297 | BASBBSDSASSE | FALSE | TRUE | FALSE | 19.01 |
| Q05655 | 298 | ASBBSDSASSEP | FALSE | TRUE | FALSE | 17.7  |
| Q05655 | 299 | SBBSDSASSEPV | FALSE | TRUE | FALSE | 17.72 |
| Q05655 | 300 | BBSDSASSEPVG | FALSE | TRUE | FALSE | 11.61 |
| Q05655 | 363 | VLLGELKGBGEY | FALSE | TRUE | FALSE | 16.23 |
| Q05655 | 364 | LLGELKGBGEYF | FALSE | TRUE | FALSE | 25.86 |
| Q05655 | 365 | LGELKGBGEYFA | FALSE | TRUE | FALSE | 10.96 |
| Q05655 | 366 | GELKGBGEYFAI | FALSE | TRUE | FALSE | 21.77 |
| Q05655 | 367 | ELKGBGEYFAIK | FALSE | TRUE | FALSE | 20.79 |
| Q05655 | 368 | LKGBGEYFAIKA | FALSE | TRUE | FALSE | 12.02 |
| Q05655 | 438 | HIQDKGBFELYB | FALSE | TRUE | FALSE | 14.36 |
| Q05655 | 439 | IQDKGBFELYBA | FALSE | TRUE | FALSE | 15.05 |
| Q05655 | 440 | QDKGBFELYBAT | FALSE | TRUE | FALSE | 23.58 |
| Q05655 | 469 | IYBDLKLDNVL  | FALSE | TRUE | FALSE | 11.25 |
| Q05655 | 471 | YBDLKLDNVLLD | FALSE | TRUE | FALSE | 10.33 |
| Q05655 | 479 | VLLDBDGHKIA  | FALSE | TRUE | FALSE | 10.11 |
| Q05655 | 480 | LLDBDGHKIID  | FALSE | TRUE | FALSE | 12.73 |
| Q05655 | 481 | LDBDGHKIIDF  | FALSE | TRUE | FALSE | 10.07 |



|        |     |              |       |      |       |       |
|--------|-----|--------------|-------|------|-------|-------|
| Q05655 | 483 | BDGHIKIADFGM | FALSE | TRUE | FALSE | 10.4  |
| Q05655 | 497 | ENIFGESBASTF | FALSE | TRUE | FALSE | 15.62 |
| Q05655 | 498 | NIFGESBASTFC | FALSE | TRUE | FALSE | 10.14 |
| Q05655 | 499 | IFGESBASTFCG | FALSE | TRUE | FALSE | 12.24 |
| Q05655 | 500 | FGESBASTFCGT | FALSE | TRUE | FALSE | 15.19 |
| Q05655 | 501 | GESBASTFCGTP | FALSE | TRUE | FALSE | 11.89 |
| Q05655 | 502 | ESBASTFCGTPD | FALSE | TRUE | FALSE | 11.5  |
| Q05655 | 503 | SBASTFCGTPDY | FALSE | TRUE | FALSE | 11.94 |
| Q05655 | 559 | SIBVDTPHYPBW | FALSE | TRUE | FALSE | 12.35 |
| Q05655 | 563 | DTPHYPBWITKE | FALSE | TRUE | FALSE | 14.17 |
| Q05655 | 564 | TPHYPBWITKES | FALSE | TRUE | FALSE | 11.85 |
| Q05655 | 566 | HYPBWITKESKD | FALSE | TRUE | FALSE | 13.17 |
| Q05655 | 567 | YPBWITKESKDI | FALSE | TRUE | FALSE | 10.43 |
| Q05655 | 568 | PBWITKESKDIL | FALSE | TRUE | FALSE | 11.52 |
| Q05655 | 578 | ILEKLFEBEPTK | FALSE | TRUE | FALSE | 10.86 |
| Q05655 | 579 | LEKLFEBEPTKB | FALSE | TRUE | FALSE | 21.59 |
| Q05655 | 580 | EKLFEBEPTKBL | FALSE | TRUE | FALSE | 26.29 |
| Q05655 | 581 | KLFEBEPTKBLG | FALSE | TRUE | FALSE | 16.31 |
| Q05655 | 582 | LFEBEPTKBLGV | FALSE | TRUE | FALSE | 35.78 |
| Q05655 | 583 | FEBEPTKBLGVT | FALSE | TRUE | FALSE | 30.41 |
| Q05655 | 584 | EBEPTKBLGVTG | FALSE | TRUE | FALSE | 13.41 |
| Q05655 | 608 | WTLLEKBBLEPP | FALSE | TRUE | FALSE | 11.93 |
| Q05655 | 609 | TLLEKBBLEPPF | FALSE | TRUE | FALSE | 13.7  |
| Q05655 | 610 | LLEKBBLEPPFB | FALSE | TRUE | FALSE | 24.11 |
| Q05655 | 611 | LEKBBLEPPFBP | FALSE | TRUE | FALSE | 15.79 |
| Q05655 | 635 | QEFLNEKABLSY | FALSE | TRUE | FALSE | 10.07 |
| Q05655 | 636 | EFLNEKABLSYS | FALSE | TRUE | FALSE | 10.74 |
| Q05655 | 637 | FLNEKABLSYSD | FALSE | TRUE | FALSE | 11.79 |
| Q05655 | 638 | LNEKABLSYSDK | FALSE | TRUE | FALSE | 10.63 |
| Q05655 | 639 | NEKABLSYSDKN | FALSE | TRUE | FALSE | 10.8  |
| Q05655 | 642 | ABLSYSDKNLID | FALSE | TRUE | FALSE | 14.96 |
| P05109 | 23  | KGNFHAVYBDDL | FALSE | TRUE | FALSE | 10.26 |
| P05109 | 24  | GNFHAVYBDDLK | FALSE | TRUE | FALSE | 12.24 |
| P05109 | 37  | LLETECPQYIBK | FALSE | TRUE | FALSE | 10.56 |
| P06702 | 82  | LMABLTWASHEK | FALSE | TRUE | FALSE | 12.37 |
| P06702 | 83  | MABLTWASHEKM | FALSE | TRUE | FALSE | 14.11 |
| P06702 | 84  | ABLTWASHEKMH | FALSE | TRUE | FALSE | 11.31 |
| Q9ULC6 | 37  | ANSFBVSGSSGV | FALSE | TRUE | FALSE | 10.23 |
| Q9ULC6 | 50  | VFMVYNBTBVKE | FALSE | TRUE | FALSE | 20.35 |
| Q9ULC6 | 51  | FMVYNBTBVKEP | FALSE | TRUE | FALSE | 20.4  |
| Q9ULC6 | 52  | MVYNBTBVKEPI | FALSE | TRUE | FALSE | 30.3  |
| Q9ULC6 | 53  | VYNBTBVKEPIG | FALSE | TRUE | FALSE | 35.04 |
| Q9ULC6 | 63  | IGKABWPLDTDA | FALSE | TRUE | FALSE | 10.41 |
| Q9ULC6 | 64  | GKABWPLDTDAD | FALSE | TRUE | FALSE | 10.65 |
| Q9ULC6 | 159 | HBSAEPDLTHSW | FALSE | TRUE | FALSE | 13.29 |
| Q9ULC6 | 209 | KBVBVFCABGGN | FALSE | TRUE | FALSE | 14.74 |
| Q9ULC6 | 210 | BVBVFCABGGNS | FALSE | TRUE | FALSE | 31.81 |
| Q9ULC6 | 211 | VBVFCABGGNSL | FALSE | TRUE | FALSE | 30.03 |
| Q9ULC6 | 212 | BVFCABGGNSLS | FALSE | TRUE | FALSE | 43.67 |
| Q9ULC6 | 213 | VFCABGGNSLSD | FALSE | TRUE | FALSE | 48.38 |
| Q9ULC6 | 214 | FCABGGNSLSDY | FALSE | TRUE | FALSE | 32.41 |
| Q9ULC6 | 215 | CABGGNSLSDYK | FALSE | TRUE | FALSE | 20.67 |

|        |     |               |       |      |       |       |
|--------|-----|---------------|-------|------|-------|-------|
| Q9ULC6 | 216 | ABGGNSLSDYKQ  | FALSE | TRUE | FALSE | 23.28 |
| Q9ULC6 | 287 | VGFBMAPWIMTP  | FALSE | TRUE | FALSE | 14    |
| Q9ULC6 | 288 | GFBMAPWIMTPN  | FALSE | TRUE | FALSE | 15.94 |
| Q9ULC6 | 289 | FBMAPWIMTPNT  | FALSE | TRUE | FALSE | 14.05 |
| Q9ULC6 | 335 | KLTICPQVENBN  | FALSE | TRUE | FALSE | 10.24 |
| Q9ULC6 | 365 | SFPVVFDSPPBNB | FALSE | TRUE | FALSE | 13.31 |
| Q9ULC6 | 366 | FPVVFDSPPBNBG | FALSE | TRUE | FALSE | 14.58 |
| Q9ULC6 | 367 | PVVFDSPPBNBGL | FALSE | TRUE | FALSE | 11.23 |
| Q9ULC6 | 368 | VVFDSPPBNBGLK | FALSE | TRUE | FALSE | 27.26 |
| Q9ULC6 | 369 | VFDSPPBNBGLKD | FALSE | TRUE | FALSE | 33.39 |
| Q9ULC6 | 370 | FDSPPBNBGLKDF | FALSE | TRUE | FALSE | 36.34 |
| Q9ULC6 | 371 | DSPBNBGLKDFP  | FALSE | TRUE | FALSE | 31.19 |
| Q9ULC6 | 372 | SPBNBGLKDFPY  | FALSE | TRUE | FALSE | 37.86 |
| Q9ULC6 | 374 | BNBGLKDFPYKB  | FALSE | TRUE | FALSE | 11.33 |
| Q9ULC6 | 375 | NBGLKDFPYKBI  | FALSE | TRUE | FALSE | 12.16 |
| Q9ULC6 | 385 | BILGPDFGYVTB  | FALSE | TRUE | FALSE | 24.43 |
| Q9ULC6 | 386 | ILGPDFGYVTBE  | FALSE | TRUE | FALSE | 55.56 |
| Q9ULC6 | 387 | LGPDFGYVTBEI  | FALSE | TRUE | FALSE | 54.34 |
| Q9ULC6 | 388 | GPDFGYVTBEIP  | FALSE | TRUE | FALSE | 62.25 |
| Q9ULC6 | 389 | PDFGYVTBEIPL  | FALSE | TRUE | FALSE | 45.76 |
| Q9ULC6 | 390 | DFGYVTBEIPLP  | FALSE | TRUE | FALSE | 56.05 |
| Q9ULC6 | 391 | FGYVTBEIPLPG  | FALSE | TRUE | FALSE | 74.67 |
| Q9ULC6 | 392 | GYVTBEIPLPGP  | FALSE | TRUE | FALSE | 89.3  |
| Q9ULC6 | 393 | YVTBEIPLPGPS  | FALSE | TRUE | FALSE | 72.12 |
| Q9ULC6 | 394 | VTBEIPLPGPSS  | FALSE | TRUE | FALSE | 16.81 |
| Q9ULC6 | 395 | TBEIPLPGPSSL  | FALSE | TRUE | FALSE | 10.54 |
| Q9ULC6 | 418 | VTVGGTEYPLGB  | FALSE | TRUE | FALSE | 12.53 |
| Q9ULC6 | 435 | SFPKSGGBQMAB  | FALSE | TRUE | FALSE | 10.53 |
| Q9ULC6 | 438 | KSGGBQMABAVB  | FALSE | TRUE | FALSE | 11.19 |
| Q9ULC6 | 439 | SGGBQMABAVBN  | FALSE | TRUE | FALSE | 14.5  |
| Q9ULC6 | 440 | GGBQMABAVBNF  | FALSE | TRUE | FALSE | 15.08 |
| Q9ULC6 | 442 | BQMABAVBNFLK  | FALSE | TRUE | FALSE | 11.87 |
| Q9ULC6 | 444 | MABAVBNFLKAQ  | FALSE | TRUE | FALSE | 13.69 |
| Q9ULC6 | 528 | NEMLADBHLQBD  | FALSE | TRUE | FALSE | 10.78 |
| Q9ULC6 | 530 | MLADBHLQBDNL  | FALSE | TRUE | FALSE | 20.37 |
| Q9ULC6 | 531 | LADBHLQBDNLH  | FALSE | TRUE | FALSE | 24.31 |
| Q9ULC6 | 532 | ADBHLQBDNLHA  | FALSE | TRUE | FALSE | 19.82 |
| Q9ULC6 | 533 | DBHLQBDNLHAQ  | FALSE | TRUE | FALSE | 22.63 |
| Q9ULC6 | 534 | BHLQBDNLHAQK  | FALSE | TRUE | FALSE | 13.14 |
| Q9ULC6 | 535 | HLQBDNLHAQKC  | FALSE | TRUE | FALSE | 10.12 |
| Q9ULC6 | 536 | LQBDNLHAQKCI  | FALSE | TRUE | FALSE | 14.68 |
| Q9ULC6 | 537 | QBDNLHAQKCID  | FALSE | TRUE | FALSE | 11.38 |
| Q9ULC6 | 545 | KCIDWNBVLKB   | FALSE | TRUE | FALSE | 12.77 |
| Q9ULC6 | 546 | CIDWNBVLKBE   | FALSE | TRUE | FALSE | 34.92 |
| Q9ULC6 | 547 | IDWNBVLKBEL   | FALSE | TRUE | FALSE | 25.79 |
| Q9ULC6 | 548 | DWNBVLKBELG   | FALSE | TRUE | FALSE | 32.37 |
| Q9ULC6 | 549 | WNBVLKBELGL   | FALSE | TRUE | FALSE | 39.93 |
| Q9ULC6 | 550 | NBNVLKBELGLA  | FALSE | TRUE | FALSE | 22.3  |
| Q9ULC6 | 551 | BNVLKBELGLAE  | FALSE | TRUE | FALSE | 18.39 |
| Q9ULC6 | 641 | GEIHCGTNVBBK  | FALSE | TRUE | FALSE | 15.73 |
| Q9ULC6 | 642 | EIHCGTNVBBKP  | FALSE | TRUE | FALSE | 13.25 |
| Q9ULC6 | 644 | HCGTNVBBKPPF  | FALSE | TRUE | FALSE | 13.94 |

|        |     |              |       |      |       |       |
|--------|-----|--------------|-------|------|-------|-------|
| Q9ULC6 | 645 | CGTNVBBKPPFF | FALSE | TRUE | FALSE | 13.91 |
| Q9Y2J8 | 1   | MLBEBTVBLQYG | FALSE | TRUE | FALSE | 24.79 |
| Q9Y2J8 | 2   | LBEBTVBLQYGS | FALSE | TRUE | FALSE | 32.45 |
| Q9Y2J8 | 3   | BEBTVBLQYGSB | FALSE | TRUE | FALSE | 41.77 |
| Q9Y2J8 | 4   | EBTVBLQYGSBV | FALSE | TRUE | FALSE | 24.77 |
| Q9Y2J8 | 5   | BTVBLQYGSBVE | FALSE | TRUE | FALSE | 17.88 |
| Q9Y2J8 | 6   | TVBLQYGSBVEA | FALSE | TRUE | FALSE | 11.88 |
| Q9Y2J8 | 7   | VBLQYGSBVEAV | FALSE | TRUE | FALSE | 21.57 |
| Q9Y2J8 | 8   | BLQYGSBVEAVY | FALSE | TRUE | FALSE | 21.26 |
| Q9Y2J8 | 183 | QMILBTKGPDBL | FALSE | TRUE | FALSE | 12.52 |
| Q9Y2J8 | 333 | CELKVCFQYLN  | FALSE | TRUE | FALSE | 10.87 |
| Q9Y2J8 | 334 | ELKVCFQYLN   | FALSE | TRUE | FALSE | 12.42 |
| Q9Y2J8 | 335 | LKVCFQYLN    | FALSE | TRUE | FALSE | 17.12 |
| Q9Y2J8 | 336 | KVCFQYLN     | FALSE | TRUE | FALSE | 23.56 |
| Q9Y2J8 | 337 | VCFQYLN      | FALSE | TRUE | FALSE | 20.49 |
| Q9Y2J8 | 338 | CFQYLN       | FALSE | TRUE | FALSE | 21.36 |
| Q9Y2J8 | 339 | FQYLN        | FALSE | TRUE | FALSE | 22.34 |
| Q9Y2J8 | 340 | QYLN         | FALSE | TRUE | FALSE | 25.91 |
| Q9Y2J8 | 341 | YLN          | FALSE | TRUE | FALSE | 18.81 |
| Q9Y2J8 | 342 | LNB          | FALSE | TRUE | FALSE | 21.87 |
| Q9Y2J8 | 343 | NB           | FALSE | TRUE | FALSE | 22.56 |
| Q9Y2J8 | 344 | BG           | FALSE | TRUE | FALSE | 11.63 |
| Q9Y2J8 | 384 | ELLGPDFGYVTB | FALSE | TRUE | FALSE | 18.42 |
| Q9Y2J8 | 385 | LLGPDFGYVTBE | FALSE | TRUE | FALSE | 58.52 |
| Q9Y2J8 | 386 | LGPDFGYVTBEP | FALSE | TRUE | FALSE | 42.79 |
| Q9Y2J8 | 387 | GPDFGYVTBEPL | FALSE | TRUE | FALSE | 69.4  |
| Q9Y2J8 | 388 | PDFGYVTBEPLF | FALSE | TRUE | FALSE | 35.45 |
| Q9Y2J8 | 389 | DFGYVTBEPLFE | FALSE | TRUE | FALSE | 59.3  |
| Q9Y2J8 | 390 | FGYVTBEPLFES | FALSE | TRUE | FALSE | 66.5  |
| Q9Y2J8 | 391 | GYVTBEPLFESV | FALSE | TRUE | FALSE | 76.69 |
| Q9Y2J8 | 392 | YVTBEPLFESVT | FALSE | TRUE | FALSE | 57.27 |
| Q9Y2J8 | 393 | VTBEPLFESVTS | FALSE | TRUE | FALSE | 18.51 |
| Q9Y2J8 | 430 | LIGSSFPLSGGB | FALSE | TRUE | FALSE | 10.6  |
| Q9Y2J8 | 431 | IGSSFPLSGGBB | FALSE | TRUE | FALSE | 10.08 |
| Q9Y2J8 | 433 | SSFPLSGGBBMT | FALSE | TRUE | FALSE | 14.08 |
| Q9Y2J8 | 434 | SFPLSGGBBMTK | FALSE | TRUE | FALSE | 13.03 |
| Q9Y2J8 | 435 | FPLSGGBBMTKV | FALSE | TRUE | FALSE | 14.34 |
| Q9Y2J8 | 436 | PLSGGBBMTKV  | FALSE | TRUE | FALSE | 16.05 |
| Q9Y2J8 | 437 | LSGGBBMTKVVB | FALSE | TRUE | FALSE | 21.29 |
| Q9Y2J8 | 438 | SGGBBMTKVVB  | FALSE | TRUE | FALSE | 27.41 |
| Q9Y2J8 | 439 | GGBBMTKVVBDF | FALSE | TRUE | FALSE | 36.91 |
| Q9Y2J8 | 440 | GBBMTKVVBDFL | FALSE | TRUE | FALSE | 29.05 |
| Q9Y2J8 | 441 | BBMTKVVBDFLK | FALSE | TRUE | FALSE | 10.14 |
| Q9Y2J8 | 492 | ASTSACYKLFBE | FALSE | TRUE | FALSE | 12.17 |
| Q9Y2J8 | 500 | LFBEKQKDGHGE | FALSE | TRUE | FALSE | 17.27 |
| Q9Y2J8 | 545 | QBCLDWNBDILK | FALSE | TRUE | FALSE | 27.36 |
| Q9Y2J8 | 547 | CLDWNBDILKKE | FALSE | TRUE | FALSE | 11.69 |
| Q9Y2J8 | 548 | LDWNBDILKKEL | FALSE | TRUE | FALSE | 12.36 |
| Q9Y2J8 | 576 | DEHBAFAFFPN  | FALSE | TRUE | FALSE | 15.59 |
| Q9Y2J8 | 577 | EDHBAFAFFPNM | FALSE | TRUE | FALSE | 13.92 |
| Q9Y2J8 | 578 | DHBAFAFFPNMV | FALSE | TRUE | FALSE | 11.4  |
| Q9Y2J8 | 579 | HBAFAFFPNMVN | FALSE | TRUE | FALSE | 26.14 |

|        |     |               |       |      |       |       |
|--------|-----|---------------|-------|------|-------|-------|
| Q9Y2J8 | 580 | BABAFFPNMVNM  | FALSE | TRUE | FALSE | 25.48 |
| Q9Y2J8 | 581 | ABAFFPNMVNMI  | FALSE | TRUE | FALSE | 10.62 |
| Q9Y2J8 | 614 | LEMHV BGLLEPL | FALSE | TRUE | FALSE | 10.26 |
| Q9Y2J8 | 617 | HVBGLLEPLGLE  | FALSE | TRUE | FALSE | 13.41 |
| Q9Y2J8 | 618 | VBGLLEPLGLEC  | FALSE | TRUE | FALSE | 10.83 |
| Q9Y2J8 | 643 | GEVHCGTNVBBK  | FALSE | TRUE | FALSE | 15.86 |
| Q9Y2J8 | 644 | EVHCGTNVBBKP  | FALSE | TRUE | FALSE | 16.01 |
| Q9Y2J8 | 646 | HCGTNVBBKPFT  | FALSE | TRUE | FALSE | 12.45 |
| Q9Y2J8 | 647 | CGTNVBBKPFTF  | FALSE | TRUE | FALSE | 12.31 |
| Q9ULW8 | 50  | IYISPNMEBGBE  | FALSE | TRUE | FALSE | 14.39 |
| Q9ULW8 | 51  | YISPNMEBGBEB  | FALSE | TRUE | FALSE | 15.36 |
| Q9ULW8 | 52  | ISPNMEBGBEBA  | FALSE | TRUE | FALSE | 10.46 |
| Q9ULW8 | 53  | SPNMEBGBEBAD  | FALSE | TRUE | FALSE | 11.18 |
| Q9ULW8 | 54  | PNMEBGBEBADT  | FALSE | TRUE | FALSE | 19.58 |
| Q9ULW8 | 55  | NMEBGBEBADTB  | FALSE | TRUE | FALSE | 25.12 |
| Q9ULW8 | 56  | MEBGBEBADTBB  | FALSE | TRUE | FALSE | 25.6  |
| Q9ULW8 | 57  | EBGBEBADTBBW  | FALSE | TRUE | FALSE | 45.8  |
| Q9ULW8 | 58  | BGBEBADTBBWB  | FALSE | TRUE | FALSE | 30.56 |
| Q9ULW8 | 59  | GBEBADTBBWBF  | FALSE | TRUE | FALSE | 28.05 |
| Q9ULW8 | 60  | BEBADTBBWbfd  | FALSE | TRUE | FALSE | 25.34 |
| Q9ULW8 | 61  | EBADTBBWbfdA  | FALSE | TRUE | FALSE | 16.93 |
| Q9ULW8 | 62  | BADTBBWbfdAT  | FALSE | TRUE | FALSE | 19.62 |
| Q9ULW8 | 63  | ADTBBWbfdATL  | FALSE | TRUE | FALSE | 23.41 |
| Q9ULW8 | 64  | DTBBWbfdATLE  | FALSE | TRUE | FALSE | 23.69 |
| Q9ULW8 | 65  | TBBWbfdATLEI  | FALSE | TRUE | FALSE | 15.9  |
| Q9ULW8 | 121 | CDLNCEGBQDBN  | FALSE | TRUE | FALSE | 12.01 |
| Q9ULW8 | 122 | DLNCEGBQDBNF  | FALSE | TRUE | FALSE | 12.06 |
| Q9ULW8 | 123 | LNCEGBQDBNFV  | FALSE | TRUE | FALSE | 15.65 |
| Q9ULW8 | 124 | NCEGBQDBNFVD  | FALSE | TRUE | FALSE | 12.72 |
| Q9ULW8 | 125 | CEGBQDBNFVDK  | FALSE | TRUE | FALSE | 18.68 |
| Q9ULW8 | 126 | EGBQDBNFVDKB  | FALSE | TRUE | FALSE | 34.89 |
| Q9ULW8 | 127 | GBQDBNFVDKBQ  | FALSE | TRUE | FALSE | 42.1  |
| Q9ULW8 | 128 | BQDBNFVDKBQW  | FALSE | TRUE | FALSE | 17.83 |
| Q9ULW8 | 129 | QDBNFVDKBQWW  | FALSE | TRUE | FALSE | 11.72 |
| Q9ULW8 | 130 | DBNFVDKBQWWW  | FALSE | TRUE | FALSE | 14.03 |
| Q9ULW8 | 202 | HTSSYDAKBAQV  | FALSE | TRUE | FALSE | 10.9  |
| Q9ULW8 | 203 | TSSYDAKBAQVF  | FALSE | TRUE | FALSE | 14.84 |
| Q9ULW8 | 222 | VCEAYBHVLGQD  | FALSE | TRUE | FALSE | 11.13 |
| Q9ULW8 | 223 | CEAYBHVLGQDK  | FALSE | TRUE | FALSE | 13.12 |
| Q9ULW8 | 224 | EAYBHVLGQDKV  | FALSE | TRUE | FALSE | 17.56 |
| Q9ULW8 | 225 | AYBHVLGQDKVS  | FALSE | TRUE | FALSE | 15.31 |
| Q9ULW8 | 226 | YBHVLGQDKVSY  | FALSE | TRUE | FALSE | 10.21 |
| Q9ULW8 | 366 | VVFDSPBNGELQ  | FALSE | TRUE | FALSE | 10.56 |
| Q9ULW8 | 368 | FDSPBNGELQDF  | FALSE | TRUE | FALSE | 15.33 |
| Q9ULW8 | 370 | SPBNGELQDFPY  | FALSE | TRUE | FALSE | 17.52 |
| Q9ULW8 | 372 | BNGELQDFPYKB  | FALSE | TRUE | FALSE | 37.31 |
| Q9ULW8 | 373 | NGELQDFPYKBI  | FALSE | TRUE | FALSE | 10.98 |
| Q9ULW8 | 383 | BILGPDFGYVTB  | FALSE | TRUE | FALSE | 24.43 |
| Q9ULW8 | 384 | ILGPDFGYVTBE  | FALSE | TRUE | FALSE | 55.56 |
| Q9ULW8 | 385 | LGPDFGYVTBEP  | FALSE | TRUE | FALSE | 42.79 |
| Q9ULW8 | 386 | GPDFGYVTBEPB  | FALSE | TRUE | FALSE | 57.37 |
| Q9ULW8 | 387 | PDFGYVTBEPBD  | FALSE | TRUE | FALSE | 45.55 |

|        |     |               |       |      |       |       |
|--------|-----|---------------|-------|------|-------|-------|
| Q9ULW8 | 388 | DFGYVTBEPBDB  | FALSE | TRUE | FALSE | 27.54 |
| Q9ULW8 | 389 | FGYVTBEPBDBS  | FALSE | TRUE | FALSE | 56.01 |
| Q9ULW8 | 390 | GYVTBEPBDBSV  | FALSE | TRUE | FALSE | 54.04 |
| Q9ULW8 | 391 | YVTBEPBDBSVS  | FALSE | TRUE | FALSE | 41.25 |
| Q9ULW8 | 392 | VTBEPBDBSVSG  | FALSE | TRUE | FALSE | 23.58 |
| Q9ULW8 | 393 | TBEPBDBSVSGL  | FALSE | TRUE | FALSE | 18.18 |
| Q9ULW8 | 394 | BEPBDBSVSGLD  | FALSE | TRUE | FALSE | 10.74 |
| Q9ULW8 | 429 | LIGGNLPGSSGB  | FALSE | TRUE | FALSE | 10.29 |
| Q9ULW8 | 430 | IGGNLPGSSGBB  | FALSE | TRUE | FALSE | 15.23 |
| Q9ULW8 | 431 | GGNLPGSSGBBV  | FALSE | TRUE | FALSE | 14.26 |
| Q9ULW8 | 432 | GNLPGSSGBBVT  | FALSE | TRUE | FALSE | 14.69 |
| Q9ULW8 | 433 | NLPGSSGBBVTQ  | FALSE | TRUE | FALSE | 14.42 |
| Q9ULW8 | 434 | LPGSSGBBVTQV  | FALSE | TRUE | FALSE | 21.22 |
| Q9ULW8 | 436 | GSSGBBVTQVVB  | FALSE | TRUE | FALSE | 12.32 |
| Q9ULW8 | 437 | SSGBBVTQVVBD  | FALSE | TRUE | FALSE | 16.61 |
| Q9ULW8 | 438 | SGBBVTQVVBDV  | FALSE | TRUE | FALSE | 15.06 |
| Q9ULW8 | 439 | GBBVTQVVBDVDF | FALSE | TRUE | FALSE | 14.11 |
| Q9ULW8 | 542 | KFVQSCIDWNBE  | FALSE | TRUE | FALSE | 10.15 |
| Q9ULW8 | 545 | QSCIDWNBEVLK  | FALSE | TRUE | FALSE | 17.9  |
| Q9ULW8 | 546 | SCIDWNBEVLKB  | FALSE | TRUE | FALSE | 35.22 |
| Q9ULW8 | 547 | CIDWNBEVLKBE  | FALSE | TRUE | FALSE | 39.58 |
| Q9ULW8 | 548 | IDWNBEVLKBEL  | FALSE | TRUE | FALSE | 42.08 |
| Q9ULW8 | 549 | DWNBEVLKBELG  | FALSE | TRUE | FALSE | 40.84 |
| Q9ULW8 | 550 | WNBEVLKBELGL  | FALSE | TRUE | FALSE | 44.1  |
| Q9ULW8 | 551 | NBEVLKBELGLA  | FALSE | TRUE | FALSE | 23.3  |
| Q9ULW8 | 552 | BEVLKBELGLAE  | FALSE | TRUE | FALSE | 15.81 |
| Q9ULW8 | 555 | LKBELGLAECDI  | FALSE | TRUE | FALSE | 10    |
| Q9UM07 | 115 | ISLCADITBTGK  | FALSE | TRUE | FALSE | 21.86 |
| Q9UM07 | 116 | SLCADITBTGKV  | FALSE | TRUE | FALSE | 40.8  |
| Q9UM07 | 118 | CADITBTGKVKP  | FALSE | TRUE | FALSE | 11.73 |
| Q9UM07 | 120 | DITBTGKVKPTB  | FALSE | TRUE | FALSE | 27.35 |
| Q9UM07 | 121 | ITBTGKVKPTBA  | FALSE | TRUE | FALSE | 10.68 |
| Q9UM07 | 128 | KPTBAVKDQBTW  | FALSE | TRUE | FALSE | 11.49 |
| Q9UM07 | 129 | PTBAVKDQBTWT  | FALSE | TRUE | FALSE | 21.95 |
| Q9UM07 | 130 | TBAVKDQBTWTW  | FALSE | TRUE | FALSE | 20.37 |
| Q9UM07 | 207 | EMDKVBFQATB   | FALSE | TRUE | FALSE | 10.87 |
| Q9UM07 | 208 | MDKVBFQATBG   | FALSE | TRUE | FALSE | 12.8  |
| Q9UM07 | 209 | DKVBFQATBGK   | FALSE | TRUE | FALSE | 12.27 |
| Q9UM07 | 211 | VBFQATBGKLS   | FALSE | TRUE | FALSE | 21.16 |
| Q9UM07 | 212 | BVFQATBGKLSS  | FALSE | TRUE | FALSE | 25.79 |
| Q9UM07 | 365 | PVVF DSPBNBGL | FALSE | TRUE | FALSE | 11.23 |
| Q9UM07 | 366 | VVF DSPBNBGLK | FALSE | TRUE | FALSE | 27.26 |
| Q9UM07 | 367 | VF DSPBNBGLKE | FALSE | TRUE | FALSE | 31.37 |
| Q9UM07 | 368 | F DSPBNBGLKEF | FALSE | TRUE | FALSE | 36.12 |
| Q9UM07 | 369 | DSPBNBGLKEFP  | FALSE | TRUE | FALSE | 32.72 |
| Q9UM07 | 370 | SPBNBGLKEFPI  | FALSE | TRUE | FALSE | 43.13 |
| Q9UM07 | 371 | PBNBGLKEFPIK  | FALSE | TRUE | FALSE | 10.96 |
| Q9UM07 | 372 | BNBGLKEFPIKB  | FALSE | TRUE | FALSE | 18.01 |
| Q9UM07 | 373 | NBGLKEFPIKBV  | FALSE | TRUE | FALSE | 14.33 |
| Q9UM07 | 383 | BVMGPDFGYVTB  | FALSE | TRUE | FALSE | 37.67 |
| Q9UM07 | 384 | VMGPDFGYVTBG  | FALSE | TRUE | FALSE | 43.86 |
| Q9UM07 | 385 | MGPDFGYVTBGP  | FALSE | TRUE | FALSE | 41.62 |

|        |     |              |       |      |       |       |
|--------|-----|--------------|-------|------|-------|-------|
| Q9UM07 | 386 | GPDFGYVTBGPQ | FALSE | TRUE | FALSE | 47.6  |
| Q9UM07 | 387 | PDFGYVTBGPQT | FALSE | TRUE | FALSE | 49.13 |
| Q9UM07 | 388 | DFGYVTBGPQTG | FALSE | TRUE | FALSE | 59.17 |
| Q9UM07 | 389 | FGYVTBGPQTGG | FALSE | TRUE | FALSE | 29.07 |
| Q9UM07 | 390 | GYVTBGPQTGGI | FALSE | TRUE | FALSE | 49.1  |
| Q9UM07 | 391 | YVTBGPQTGGIS | FALSE | TRUE | FALSE | 56.88 |
| Q9UM07 | 392 | VTBGPQTGGISG | FALSE | TRUE | FALSE | 28.53 |
| Q9UM07 | 393 | TBGPQTGGISGL | FALSE | TRUE | FALSE | 20.61 |
| Q9UM07 | 412 | VSPPVTVBGKEY | FALSE | TRUE | FALSE | 23.88 |
| Q9UM07 | 413 | SPPVTVBGKEYP | FALSE | TRUE | FALSE | 22.46 |
| Q9UM07 | 414 | PPVTVBGKEYPL | FALSE | TRUE | FALSE | 18.11 |
| Q9UM07 | 415 | PVTVBGKEYPLG | FALSE | TRUE | FALSE | 12.47 |
| Q9UM07 | 416 | VTVBGKEYPLGB | FALSE | TRUE | FALSE | 22.18 |
| Q9UM07 | 417 | TVBGKEYPLGBI | FALSE | TRUE | FALSE | 27.43 |
| Q9UM07 | 418 | VBGKEYPLGBIL | FALSE | TRUE | FALSE | 17.92 |
| Q9UM07 | 431 | GDSCYPSNDSBQ | FALSE | TRUE | FALSE | 16.72 |
| Q9UM07 | 432 | DSCYPSNDSBQM | FALSE | TRUE | FALSE | 10.33 |
| Q9UM07 | 433 | SCYPSNDSBQMH | FALSE | TRUE | FALSE | 12.3  |
| Q9UM07 | 434 | CYPSNDSBQMHQ | FALSE | TRUE | FALSE | 12.49 |
| Q9UM07 | 437 | SNDSBQMHQALQ | FALSE | TRUE | FALSE | 14.52 |
| Q9UM07 | 438 | NDSBQMHQALQD | FALSE | TRUE | FALSE | 14.75 |
| Q9UM07 | 439 | DSBQMHQALQDF | FALSE | TRUE | FALSE | 21.15 |
| Q9UM07 | 440 | SBQMHQALQDFL | FALSE | TRUE | FALSE | 19.63 |
| Q9UM07 | 477 | SFVPAPDBKGF  | FALSE | TRUE | FALSE | 26.42 |
| Q9UM07 | 478 | FVPAPDBKGFBL | FALSE | TRUE | FALSE | 15.05 |
| Q9UM07 | 479 | VPAPDBKGFBL  | FALSE | TRUE | FALSE | 11.56 |
| Q9UM07 | 530 | LSNKTLEHNSF  | FALSE | TRUE | FALSE | 13.28 |
| Q9UM07 | 532 | NKTLEHNSFVE  | FALSE | TRUE | FALSE | 10.41 |
| Q9UM07 | 533 | KTLEHNSFVEB  | FALSE | TRUE | FALSE | 48.22 |
| Q9UM07 | 534 | TLBEHNSFVEBC | FALSE | TRUE | FALSE | 18.61 |
| Q9UM07 | 535 | LBEHNSFVEBCI | FALSE | TRUE | FALSE | 13.08 |
| Q9UM07 | 536 | BEHNSFVEBCID | FALSE | TRUE | FALSE | 12.27 |
| Q9UM07 | 543 | EBCIDWNBELLK | FALSE | TRUE | FALSE | 14.78 |
| Q9UM07 | 544 | BCIDWNBELLKB | FALSE | TRUE | FALSE | 39.92 |
| Q9UM07 | 545 | CIDWNBELLKBE | FALSE | TRUE | FALSE | 32.62 |
| Q9UM07 | 546 | IDWNBELLKBEL | FALSE | TRUE | FALSE | 32.1  |
| Q9UM07 | 547 | DWNBELLKBELG | FALSE | TRUE | FALSE | 35.19 |
| Q9UM07 | 548 | WNBELLKBELGL | FALSE | TRUE | FALSE | 39.03 |
| Q9UM07 | 549 | NBELLKBELGLA | FALSE | TRUE | FALSE | 22.06 |
| Q9UM07 | 550 | BELLKBELGLAE | FALSE | TRUE | FALSE | 14.64 |
| Q9UM07 | 632 | DFFTYHIBHGEV | FALSE | TRUE | FALSE | 10.74 |
| Q9UM07 | 634 | FTYHIBHGEVHC | FALSE | TRUE | FALSE | 10.95 |
| Q9UM07 | 635 | TYHIBHGEVHCG | FALSE | TRUE | FALSE | 16.39 |
| Q9UM07 | 636 | YHIBHGEVHCGT | FALSE | TRUE | FALSE | 20.84 |
| Q9UM07 | 637 | HIBHGEVHCGTN | FALSE | TRUE | FALSE | 14.75 |
| Q9UM07 | 638 | IBHGEVHCGTNV | FALSE | TRUE | FALSE | 14.55 |
| Q9UM07 | 639 | BHGEVHCGTNVB | FALSE | TRUE | FALSE | 13.67 |
| Q9UM07 | 641 | GEVHCGTNVBBK | FALSE | TRUE | FALSE | 15.86 |
| Q9UM07 | 642 | EVHCGTNVBBKP | FALSE | TRUE | FALSE | 16.01 |
| Q9UM07 | 644 | HCGTNVBBKPF  | FALSE | TRUE | FALSE | 11.57 |
| Q9UM07 | 645 | CGTNVBBKPF   | FALSE | TRUE | FALSE | 12.91 |
| Q6TGC4 | 2   | VSVEGBAMSFQS | FALSE | TRUE | FALSE | 20.46 |

|        |      |                |       |      |       |       |
|--------|------|----------------|-------|------|-------|-------|
| Q6TGC4 | 3    | SVEGBAMSFQSI   | FALSE | TRUE | FALSE | 11.06 |
| Q6TGC4 | 128  | VDIYBNGQVEMS   | FALSE | TRUE | FALSE | 16.32 |
| Q6TGC4 | 129  | DIYBNGQVEMSS   | FALSE | TRUE | FALSE | 18.82 |
| Q6TGC4 | 130  | IYBNGQVEMSSD   | FALSE | TRUE | FALSE | 13.32 |
| Q6TGC4 | 131  | YBNGQVEMSSDK   | FALSE | TRUE | FALSE | 10.39 |
| Q6TGC4 | 220  | ABVYWPQKDNSS   | FALSE | TRUE | FALSE | 12.53 |
| Q6TGC4 | 344  | ASVYEDPNBLGB   | FALSE | TRUE | FALSE | 10.49 |
| Q6TGC4 | 349  | DPNBLGBWLQDE   | FALSE | TRUE | FALSE | 10.21 |
| Q6TGC4 | 439  | IGSSFYPSAEGB   | FALSE | TRUE | FALSE | 10.36 |
| Q6TGC4 | 443  | FYPSAEGBAMSK   | FALSE | TRUE | FALSE | 12.81 |
| Q6TGC4 | 444  | YPSAEGBAMSKT   | FALSE | TRUE | FALSE | 14.22 |
| Q6TGC4 | 446  | SAEGBAMSKTLB   | FALSE | TRUE | FALSE | 28.39 |
| Q6TGC4 | 447  | AEGBAMSKTLBD   | FALSE | TRUE | FALSE | 23    |
| Q6TGC4 | 448  | EGBAMSKTLBDF   | FALSE | TRUE | FALSE | 18.54 |
| Q6TGC4 | 449  | GBAMSKTLBDFL   | FALSE | TRUE | FALSE | 15.87 |
| Q6TGC4 | 505  | ASPSACYKLFBE   | FALSE | TRUE | FALSE | 16.44 |
| Q6TGC4 | 513  | LFBEKQKEGYGD   | FALSE | TRUE | FALSE | 22.74 |
| Q6TGC4 | 514  | FBEKQKEGYGDA   | FALSE | TRUE | FALSE | 20.1  |
| Q6TGC4 | 531  | LBADQLLSNGBE   | FALSE | TRUE | FALSE | 19.58 |
| Q6TGC4 | 535  | QLLSNGBEAKTI   | FALSE | TRUE | FALSE | 13.8  |
| Q6TGC4 | 537  | LSNGBEAKTIDQ   | FALSE | TRUE | FALSE | 12.06 |
| Q6TGC4 | 538  | SNGBEAKTIDQL   | FALSE | TRUE | FALSE | 10.9  |
| Q6TGC4 | 539  | NGBEAKTIDQLL   | FALSE | TRUE | FALSE | 10.67 |
| Q6TGC4 | 540  | GBEAKTIDQLLA   | FALSE | TRUE | FALSE | 13.6  |
| Q92954 | 29   | SCAGBCGEGYSB   | FALSE | TRUE | FALSE | 14.08 |
| Q92954 | 30   | CAGBCGEGYSBD   | FALSE | TRUE | FALSE | 12.58 |
| Q92954 | 31   | AGBCGEGYSBDA   | FALSE | TRUE | FALSE | 16.28 |
| Q92954 | 32   | GBCGEGYSBDAT   | FALSE | TRUE | FALSE | 18.11 |
| Q92954 | 33   | BCGEGYSBDATC   | FALSE | TRUE | FALSE | 10.19 |
| Q92954 | 62   | BVCTAELSCKGB   | FALSE | TRUE | FALSE | 21.96 |
| Q92954 | 70   | CKGBCFESFEBG   | FALSE | TRUE | FALSE | 16.23 |
| Q92954 | 71   | KGBCFESFEBGB   | FALSE | TRUE | FALSE | 15.93 |
| Q92954 | 72   | GBCFESFEBGBE   | FALSE | TRUE | FALSE | 29.25 |
| Q92954 | 73   | BCFESFEBGBEC   | FALSE | TRUE | FALSE | 14.3  |
| Q92954 | 76   | ESFEBGBECD CD  | FALSE | TRUE | FALSE | 10.78 |
| Q92954 | 77   | SFEBGBECD CDA  | FALSE | TRUE | FALSE | 14.71 |
| Q92954 | 78   | FEBGBECD CDAQ  | FALSE | TRUE | FALSE | 15.17 |
| Q92954 | 80   | BGBECD CDAQCK  | FALSE | TRUE | FALSE | 23.42 |
| Q92954 | 1062 | LNPTS BIAEAML  | FALSE | TRUE | FALSE | 11.17 |
| Q92954 | 1063 | NPTS BIAEAMLQ  | FALSE | TRUE | FALSE | 11.03 |
| Q92954 | 1065 | TS BIAEAMLQTT  | FALSE | TRUE | FALSE | 11.37 |
| Q92954 | 1067 | BIAEAMLQTTTB   | FALSE | TRUE | FALSE | 11.7  |
| Q92954 | 1117 | EVT PDM DYLPBV | FALSE | TRUE | FALSE | 10.98 |
| Q92954 | 1151 | VDGL TTLBN GTL | FALSE | TRUE | FALSE | 17.66 |
| Q92954 | 1152 | DGL TTLBN GTLV | FALSE | TRUE | FALSE | 14.54 |
| Q92954 | 1156 | TLBN GTLVAFBG  | FALSE | TRUE | FALSE | 10.21 |
| Q92954 | 1172 | MLSPF SPPSPAB  | FALSE | TRUE | FALSE | 14.01 |
| Q92954 | 1173 | LSPF SPPSPABB  | FALSE | TRUE | FALSE | 21.12 |
| Q92954 | 1174 | SPF SPPSPABBI  | FALSE | TRUE | FALSE | 18.04 |
| Q92954 | 1175 | PF SPPSPABBIT  | FALSE | TRUE | FALSE | 11.4  |
| Q92954 | 1176 | F SPPSPABBITE  | FALSE | TRUE | FALSE | 13.5  |
| Q92954 | 1177 | SPPSPABBITEV   | FALSE | TRUE | FALSE | 15.67 |

|        |      |                |       |      |       |       |
|--------|------|----------------|-------|------|-------|-------|
| Q92954 | 1178 | PPSPABBITEVW   | FALSE | TRUE | FALSE | 11.67 |
| Q92954 | 1182 | ABBITEVWGIPS   | FALSE | TRUE | FALSE | 14.69 |
| Q92954 | 1183 | BBITEVWGIPSP   | FALSE | TRUE | FALSE | 14.22 |
| Q92954 | 1190 | GIPSPIDTVFTB   | FALSE | TRUE | FALSE | 10.21 |
| Q92954 | 1257 | ESVYFFKBGGSI   | FALSE | TRUE | FALSE | 10.99 |
| Q92954 | 1258 | SVYFFKBGGSIQ   | FALSE | TRUE | FALSE | 10.91 |
| Q92954 | 1259 | VYFFKBGGSIQQ   | FALSE | TRUE | FALSE | 14.94 |
| Q92954 | 1260 | YFFKBGGSIQQY   | FALSE | TRUE | FALSE | 16.14 |
| Q92954 | 1261 | FFKBGGSIQQYI   | FALSE | TRUE | FALSE | 15.33 |
| Q92954 | 1262 | FKBGGSIQQYIY   | FALSE | TRUE | FALSE | 10.55 |
| Q92954 | 1274 | KQEPVQKCPGGB   | FALSE | TRUE | FALSE | 10.88 |
| Q92954 | 1280 | KCPGGBPALNYP   | FALSE | TRUE | FALSE | 11.04 |
| Q92954 | 1281 | CPGGBPALNYPV   | FALSE | TRUE | FALSE | 17.36 |
| Q92954 | 1282 | PGBBPALNYPVY   | FALSE | TRUE | FALSE | 11.01 |
| Q92954 | 1283 | GBBPALNYPVYG   | FALSE | TRUE | FALSE | 12.71 |
| Q92954 | 1299 | VBBBBFEBAIGP   | FALSE | TRUE | FALSE | 17.2  |
| Q92954 | 1300 | BBBBFEBAIGPS   | FALSE | TRUE | FALSE | 27.67 |
| Q92954 | 1301 | BBBFEBAGPSQ    | FALSE | TRUE | FALSE | 32.61 |
| Q92954 | 1302 | BBFEBAIGPSQT   | FALSE | TRUE | FALSE | 40.36 |
| Q92954 | 1303 | BFEBAGPSQTH    | FALSE | TRUE | FALSE | 22.2  |
| Q92954 | 1313 | THTIBIQYSPAB   | FALSE | TRUE | FALSE | 15.63 |
| Q92954 | 1315 | TIBIQYSPABLA   | FALSE | TRUE | FALSE | 11.57 |
| Q92954 | 1317 | BIQYSPABLAYQ   | FALSE | TRUE | FALSE | 12.06 |
| Q92954 | 1318 | IQYSPABLAYQD   | FALSE | TRUE | FALSE | 10.81 |
| Q92954 | 1319 | QYSPABLAYQDK   | FALSE | TRUE | FALSE | 11.45 |
| Q92954 | 1321 | SPABLAYQDKGV   | FALSE | TRUE | FALSE | 15.3  |
| Q92954 | 1322 | PABLAYQDKGVL   | FALSE | TRUE | FALSE | 10    |
| Q92954 | 1340 | SILWBGLPNVVT   | FALSE | TRUE | FALSE | 11.9  |
| Q92954 | 1341 | ILWBGLPNVVTS   | FALSE | TRUE | FALSE | 13.9  |
| Q92954 | 1342 | LWBGLPNVV TSA  | FALSE | TRUE | FALSE | 18.83 |
| Q92954 | 1343 | WBGLPNVV T SAI | FALSE | TRUE | FALSE | 12.92 |
| Q92954 | 1374 | QYYNIDVPSBTA   | FALSE | TRUE | FALSE | 11.66 |
| Q92954 | 1375 | YYNIDVPSBTAB   | FALSE | TRUE | FALSE | 14.31 |
| Q92954 | 1376 | YNIDVPSBTABA   | FALSE | TRUE | FALSE | 20.36 |
| Q92954 | 1377 | NIDVPSBTABAI   | FALSE | TRUE | FALSE | 21.55 |
| Q92954 | 1378 | IDVPSBTABAIT   | FALSE | TRUE | FALSE | 25.91 |
| Q92954 | 1379 | DVPSBTABAITT   | FALSE | TRUE | FALSE | 31.89 |
| Q92954 | 1380 | VPSBTABAITTB   | FALSE | TRUE | FALSE | 55.02 |
| Q92954 | 1381 | PSBTABAITTBS   | FALSE | TRUE | FALSE | 34.32 |
| Q92954 | 1382 | SBTABAITTBSG   | FALSE | TRUE | FALSE | 59.15 |
| Q92954 | 1383 | BTABAITTBSGQ   | FALSE | TRUE | FALSE | 62.51 |
| Q92954 | 1384 | TABAITTBSGQT   | FALSE | TRUE | FALSE | 50.48 |
| Q92954 | 1385 | ABAITTBSGQTL   | FALSE | TRUE | FALSE | 57.6  |
| Q92954 | 1386 | BAITTBSGQTLS   | FALSE | TRUE | FALSE | 67.59 |
| Q92954 | 1387 | AITTBSGQTLSK   | FALSE | TRUE | FALSE | 18.15 |
| Q92954 | 1388 | ITTBSGQTLSKV   | FALSE | TRUE | FALSE | 26.87 |
| Q92954 | 1389 | TTBSGQTLSKVV   | FALSE | TRUE | FALSE | 12.75 |
| P00734 | 3    | HVBGLQLPGCLA   | FALSE | TRUE | FALSE | 11.16 |
| P00734 | 4    | VBGLQLPGCLAL   | FALSE | TRUE | FALSE | 10.71 |
| P00734 | 29   | LAPQQABSLLQB   | FALSE | TRUE | FALSE | 18.52 |
| P00734 | 30   | APQQABSLLQBV   | FALSE | TRUE | FALSE | 10.81 |
| P00734 | 34   | ABSLLQVBVAN    | FALSE | TRUE | FALSE | 13.13 |



|        |     |              |       |      |       |       |
|--------|-----|--------------|-------|------|-------|-------|
| P00734 | 35  | BSLLQBVBBANT | FALSE | TRUE | FALSE | 16.89 |
| P00734 | 36  | SLLQBVBBANTF | FALSE | TRUE | FALSE | 10.86 |
| P00734 | 37  | LLQBVBBANTFL | FALSE | TRUE | FALSE | 13.29 |
| P00734 | 38  | LQBVBBANTFLE | FALSE | TRUE | FALSE | 24.84 |
| P00734 | 39  | QBVBBANTFLEE | FALSE | TRUE | FALSE | 25.69 |
| P00734 | 40  | BVBBANTFLEEV | FALSE | TRUE | FALSE | 28.54 |
| P00734 | 41  | VBBANTFLEEV  | FALSE | TRUE | FALSE | 16.76 |
| P00734 | 42  | BBANTFLEEVBK | FALSE | TRUE | FALSE | 25.44 |
| P00734 | 43  | BANTFLEEVBK  | FALSE | TRUE | FALSE | 13.41 |
| P00734 | 47  | FLEEVBKGNLEB | FALSE | TRUE | FALSE | 10.34 |
| P00734 | 84  | WAKYTACETABT | FALSE | TRUE | FALSE | 10.32 |
| P00734 | 86  | KYTACETABTPB | FALSE | TRUE | FALSE | 13.23 |
| P00734 | 92  | TABTPBDKLAAC | FALSE | TRUE | FALSE | 12.81 |
| P00734 | 93  | ABTPBDKLAACL | FALSE | TRUE | FALSE | 10.09 |
| P00734 | 106 | GNCAEGLGTNYB | FALSE | TRUE | FALSE | 10.6  |
| P00734 | 107 | NCAEGLGTNYBG | FALSE | TRUE | FALSE | 13.3  |
| P00734 | 108 | CAEGLGTNYBGH | FALSE | TRUE | FALSE | 12.8  |
| P00734 | 109 | AEGLGTNYBGHV | FALSE | TRUE | FALSE | 12.93 |
| P00734 | 110 | EGLGTNYBGHVN | FALSE | TRUE | FALSE | 18.92 |
| P00734 | 111 | GLGTNYBGHVNI | FALSE | TRUE | FALSE | 14.99 |
| P00734 | 112 | LGTNYBGHVNIT | FALSE | TRUE | FALSE | 15.92 |
| P00734 | 113 | GTNYBGHVNITB | FALSE | TRUE | FALSE | 28    |
| P00734 | 114 | TNYBGHVNITBS | FALSE | TRUE | FALSE | 42.44 |
| P00734 | 115 | NYBGHVNITBSG | FALSE | TRUE | FALSE | 38.91 |
| P00734 | 116 | YBGHVNITBSGI | FALSE | TRUE | FALSE | 50.64 |
| P00734 | 117 | BGHVNITBSGIE | FALSE | TRUE | FALSE | 41.3  |
| P00734 | 118 | GHVNITBSGIEC | FALSE | TRUE | FALSE | 19.32 |
| P00734 | 119 | HVNITBSGIECQ | FALSE | TRUE | FALSE | 18.78 |
| P00734 | 120 | VNITBSGIECQL | FALSE | TRUE | FALSE | 18.87 |
| P00734 | 122 | ITBSGIECQLWB | FALSE | TRUE | FALSE | 21.4  |
| P00734 | 123 | TBSGIECQLWBS | FALSE | TRUE | FALSE | 13.23 |
| P00734 | 124 | BSGIECQLWBSB | FALSE | TRUE | FALSE | 20.43 |
| P00734 | 130 | QLWBSBYPHKPE | FALSE | TRUE | FALSE | 19.36 |
| P00734 | 131 | LWBSBYPHKPEI | FALSE | TRUE | FALSE | 13.09 |
| P00734 | 132 | WBSBYPHKPEIN | FALSE | TRUE | FALSE | 20.19 |
| P00734 | 133 | BSBYPHKPEINS | FALSE | TRUE | FALSE | 16.65 |
| P00734 | 168 | WCYTDDPTVBBQ | FALSE | TRUE | FALSE | 19.02 |
| P00734 | 169 | CYTDDPTVBBQE | FALSE | TRUE | FALSE | 13.69 |
| P00734 | 170 | YTDDPTVBBQEC | FALSE | TRUE | FALSE | 11.57 |
| P00734 | 171 | TTDPTVBBQECS | FALSE | TRUE | FALSE | 10.39 |
| P00734 | 172 | TDPTVBBQECSI | FALSE | TRUE | FALSE | 12.15 |
| P00734 | 173 | DPTVBBQECSIP | FALSE | TRUE | FALSE | 12.28 |
| P00734 | 174 | PTVBBQECSIPV | FALSE | TRUE | FALSE | 13.1  |
| P00734 | 175 | TVBBQECSIPVC | FALSE | TRUE | FALSE | 11.71 |
| P00734 | 176 | VBBQECSIPVCG | FALSE | TRUE | FALSE | 15.17 |
| P00734 | 177 | BBQECSIPVCGQ | FALSE | TRUE | FALSE | 12.18 |
| P00734 | 213 | CVPDBGQQYQGB | FALSE | TRUE | FALSE | 20.96 |
| P00734 | 214 | VPDBGQQYQGBL | FALSE | TRUE | FALSE | 23.54 |
| P00734 | 215 | PDBGQQYQGBLA | FALSE | TRUE | FALSE | 31.88 |
| P00734 | 216 | DBGQQYQGBLAV | FALSE | TRUE | FALSE | 33.1  |
| P00734 | 217 | BGQQYQGBLAVT | FALSE | TRUE | FALSE | 49.97 |
| P00734 | 218 | GQQYQGBLAVTT | FALSE | TRUE | FALSE | 19.17 |

|        |     |               |       |      |       |       |
|--------|-----|---------------|-------|------|-------|-------|
| P00734 | 219 | QQYQGBLAVTTH  | FALSE | TRUE | FALSE | 15.96 |
| P00734 | 220 | QYQGBLAVTTHG  | FALSE | TRUE | FALSE | 12.92 |
| P00734 | 307 | SDBAIEGBTATS  | FALSE | TRUE | FALSE | 11.04 |
| P00734 | 309 | BAIEGBTATSEY  | FALSE | TRUE | FALSE | 11.15 |
| P00734 | 311 | IEGBTATSEYQT  | FALSE | TRUE | FALSE | 10.46 |
| P00734 | 316 | ATSEYQTTFFNPB | FALSE | TRUE | FALSE | 14.58 |
| P00734 | 317 | TSEYQTTFFNPBT | FALSE | TRUE | FALSE | 17.73 |
| P00734 | 321 | QTTFFNPBTFGSG | FALSE | TRUE | FALSE | 12.31 |
| P00734 | 322 | TFFNPBTFGSGE  | FALSE | TRUE | FALSE | 18.55 |
| P00734 | 324 | FNPBTFGSGEAD  | FALSE | TRUE | FALSE | 15.64 |
| P00734 | 352 | EBELLESYIDGB  | FALSE | TRUE | FALSE | 13.78 |
| P00734 | 353 | BELLESYIDGBI  | FALSE | TRUE | FALSE | 14.09 |
| P00734 | 357 | ESYIDGBIVEGS  | FALSE | TRUE | FALSE | 10.23 |
| P00734 | 424 | VBIGKHSBTBYE  | FALSE | TRUE | FALSE | 20.42 |
| P00734 | 425 | BIGKHSBTBYEB  | FALSE | TRUE | FALSE | 35.79 |
| P00734 | 426 | IGKHSBTBYEBN  | FALSE | TRUE | FALSE | 40.86 |
| P00734 | 427 | GKHSBTBYEBNI  | FALSE | TRUE | FALSE | 30.67 |
| P00734 | 428 | KHSBTBYEBNIE  | FALSE | TRUE | FALSE | 27.98 |
| P00734 | 429 | HSBTBYEBNIEK  | FALSE | TRUE | FALSE | 37.05 |
| P00734 | 430 | SBTBYEBNIEKI  | FALSE | TRUE | FALSE | 37.19 |
| P00734 | 431 | BTBYEBNIEKIS  | FALSE | TRUE | FALSE | 30.66 |
| P00734 | 432 | TBYEBNIEKISM  | FALSE | TRUE | FALSE | 17.51 |
| P00734 | 433 | BYEBNIEKISML  | FALSE | TRUE | FALSE | 12.13 |
| P00734 | 446 | KIYIHPBYNWBE  | FALSE | TRUE | FALSE | 21.86 |
| P00734 | 447 | IYIHPBYNWBEN  | FALSE | TRUE | FALSE | 12.27 |
| P00734 | 448 | YIHPBYNWBENL  | FALSE | TRUE | FALSE | 19.84 |
| P00734 | 449 | IHPBYNWBENLD  | FALSE | TRUE | FALSE | 16.83 |
| P00734 | 450 | HPBYNWBENLDB  | FALSE | TRUE | FALSE | 13.82 |
| P00734 | 451 | PBYNWBENLDBD  | FALSE | TRUE | FALSE | 18.62 |
| P00734 | 452 | BYNWBENLDBDI  | FALSE | TRUE | FALSE | 24.52 |
| P00734 | 453 | YNWBENLDBDIA  | FALSE | TRUE | FALSE | 11.67 |
| P00734 | 454 | NWBENLDBDIAL  | FALSE | TRUE | FALSE | 18.68 |
| P00734 | 455 | WBENLDBDIALM  | FALSE | TRUE | FALSE | 24.04 |
| P00734 | 456 | BENLDBDIALMK  | FALSE | TRUE | FALSE | 13.65 |
| P00734 | 494 | QAGYKGBVTGWC  | FALSE | TRUE | FALSE | 10.04 |
| P00734 | 537 | KDSTBIBITDNM  | FALSE | TRUE | FALSE | 10.14 |
| P00734 | 558 | GKBGDACEGDSG  | FALSE | TRUE | FALSE | 16.86 |
| P00734 | 559 | KBGDACEGDSGG  | FALSE | TRUE | FALSE | 11.07 |
| P02787 | 39  | QSFBDHMKSVIP  | FALSE | TRUE | FALSE | 11    |
| P02787 | 40  | SFBDHMKSVIP   | FALSE | TRUE | FALSE | 11.56 |
| P02787 | 41  | FBDHMKSVIPSD  | FALSE | TRUE | FALSE | 15.85 |
| P02787 | 139 | TGLGBSAGWNIP  | FALSE | TRUE | FALSE | 11.55 |
| P02787 | 141 | LGBSAGWNIPIG  | FALSE | TRUE | FALSE | 14.02 |
| P02787 | 268 | HTVVABSMGGKE  | FALSE | TRUE | FALSE | 11.37 |
| P02787 | 270 | VVABSMGGKEDL  | FALSE | TRUE | FALSE | 11.72 |
| P02787 | 335 | GYEYVTAIBNLB  | FALSE | TRUE | FALSE | 13.65 |
| P02787 | 336 | YEYVTAIBNLBE  | FALSE | TRUE | FALSE | 23.87 |
| P02787 | 337 | EYVTAIBNLBEG  | FALSE | TRUE | FALSE | 17.29 |
| P02787 | 338 | YVTAIBNLBEGT  | FALSE | TRUE | FALSE | 39.51 |
| P02787 | 339 | VTAIBNLBEGTC  | FALSE | TRUE | FALSE | 18.91 |
| P02787 | 340 | TAIBNLBEGTCP  | FALSE | TRUE | FALSE | 21.02 |
| P02787 | 341 | AIBNLBEGTCPE  | FALSE | TRUE | FALSE | 19.11 |

|        |     |               |       |      |       |       |
|--------|-----|---------------|-------|------|-------|-------|
| P02787 | 342 | IBNLBEGTCPEA  | FALSE | TRUE | FALSE | 15.63 |
| P02787 | 343 | BNLBEGTCPEAP  | FALSE | TRUE | FALSE | 11.4  |
| P02787 | 472 | AVGBTAGWNIPM  | FALSE | TRUE | FALSE | 13.93 |
| P02787 | 473 | VGBTAGWNIPMG  | FALSE | TRUE | FALSE | 15.35 |
| P02787 | 598 | LABAPNHAVVTB  | FALSE | TRUE | FALSE | 32.06 |
| P02787 | 600 | BAPNHAVVTBKD  | FALSE | TRUE | FALSE | 13.45 |
| P02787 | 604 | HAVVTBKDKEAC  | FALSE | TRUE | FALSE | 13.22 |
| P02787 | 605 | AVVTBKDKEACV  | FALSE | TRUE | FALSE | 11.91 |
| P02787 | 606 | VVTBKDKEACVH  | FALSE | TRUE | FALSE | 11.55 |
| P02787 | 613 | EACVHKILBQQQ  | FALSE | TRUE | FALSE | 12.91 |
| P02787 | 640 | LFBSETKDLLFB  | FALSE | TRUE | FALSE | 17.21 |
| P02787 | 641 | FBSETKDLLFBD  | FALSE | TRUE | FALSE | 24.06 |
| P02787 | 642 | BSETKDLLFBDD  | FALSE | TRUE | FALSE | 15.62 |
| P02787 | 655 | VCLAKLHDBNTY  | FALSE | TRUE | FALSE | 10.96 |
| P02787 | 656 | CLAKLHDBNTYE  | FALSE | TRUE | FALSE | 10.88 |
| P02787 | 657 | LAKLHDBNTYEK  | FALSE | TRUE | FALSE | 11.08 |
| P02787 | 686 | TSSLLEACTFBB  | FALSE | TRUE | FALSE | 13.97 |
| P02768 | 14  | SSAYSBGVFBBB  | FALSE | TRUE | FALSE | 24.51 |
| P02768 | 15  | SAYSBGVFBBDA  | FALSE | TRUE | FALSE | 32.3  |
| P02768 | 16  | AYSBGVFBBDAH  | FALSE | TRUE | FALSE | 30.94 |
| P02768 | 17  | YSBGVFBBDAAHK | FALSE | TRUE | FALSE | 39.27 |
| P02768 | 18  | SBGVFBBDAAHKS | FALSE | TRUE | FALSE | 45.52 |
| P02768 | 19  | BGVFBBDAAHKSE | FALSE | TRUE | FALSE | 45.05 |
| P02768 | 20  | GVFBBDAAHKSEV | FALSE | TRUE | FALSE | 42.34 |
| P02768 | 21  | VFBBDAAHKSEVA | FALSE | TRUE | FALSE | 39.85 |
| P02768 | 22  | FBBDAHKSEVAH  | FALSE | TRUE | FALSE | 42    |
| P02768 | 23  | BBDAAHKSEVAHB | FALSE | TRUE | FALSE | 29.96 |
| P02768 | 31  | VAHBFKDLGEEEN | FALSE | TRUE | FALSE | 10.51 |
| P02768 | 33  | HBFKDLGEEENFK | FALSE | TRUE | FALSE | 14.53 |
| P02768 | 97  | KLCTVATLBETY  | FALSE | TRUE | FALSE | 18.62 |
| P02768 | 98  | LCTVATLBETYG  | FALSE | TRUE | FALSE | 15.26 |
| P02768 | 99  | CTVATLBETYGE  | FALSE | TRUE | FALSE | 14.28 |
| P02768 | 100 | TVATLBETYGEM  | FALSE | TRUE | FALSE | 20.47 |
| P02768 | 102 | ATLBETYGEMAD  | FALSE | TRUE | FALSE | 22.19 |
| P02768 | 103 | TLBETYGEMADC  | FALSE | TRUE | FALSE | 15.95 |
| P02768 | 104 | LBETYGEMADCC  | FALSE | TRUE | FALSE | 13.88 |
| P02768 | 158 | FLKKYLYEIABB  | FALSE | TRUE | FALSE | 10.2  |
| P02768 | 166 | IABBHPYFYAPE  | FALSE | TRUE | FALSE | 16.6  |
| P02768 | 224 | CASLQKFGEBAF  | FALSE | TRUE | FALSE | 11.48 |
| P02768 | 231 | GEBAFKAWAVAB  | FALSE | TRUE | FALSE | 15.34 |
| P02768 | 240 | VABLSQBFPKAE  | FALSE | TRUE | FALSE | 22.21 |
| P02768 | 241 | ABLSQBFPKAEF  | FALSE | TRUE | FALSE | 23.53 |
| P02768 | 350 | FLGMFLYEYABB  | FALSE | TRUE | FALSE | 11.39 |
| P02768 | 351 | LGMFLYEYABBH  | FALSE | TRUE | FALSE | 11.25 |
| P02768 | 352 | GMFLYEYABBHP  | FALSE | TRUE | FALSE | 19.95 |
| P02768 | 353 | MFLYEYABBHPD  | FALSE | TRUE | FALSE | 21.94 |
| P02768 | 354 | FLYEYABBHPDY  | FALSE | TRUE | FALSE | 17.83 |
| P02768 | 355 | LYEYABBHPDYS  | FALSE | TRUE | FALSE | 24    |
| P02768 | 356 | YEYABBHPDYSV  | FALSE | TRUE | FALSE | 15.57 |
| P02768 | 357 | EYABBHPDYSVV  | FALSE | TRUE | FALSE | 19.71 |
| P02768 | 358 | YABBHPDYSVVL  | FALSE | TRUE | FALSE | 13.45 |
| P02768 | 448 | VEVSNLGVKVG   | FALSE | TRUE | FALSE | 12.73 |

|        |     |              |       |      |       |       |
|--------|-----|--------------|-------|------|-------|-------|
| P02768 | 544 | EBQIKKQTALVE | FALSE | TRUE | FALSE | 10.31 |
| P0DJI9 | 32  | ABDMWBAYSDMB | FALSE | TRUE | FALSE | 12.14 |
| P0DJI9 | 33  | BDMWBAYSDMBE | FALSE | TRUE | FALSE | 11.97 |
| P0DJI9 | 35  | MWBAYSDMBEAN | FALSE | TRUE | FALSE | 16.01 |
| P0DJI9 | 36  | WBAYSDMBEANY | FALSE | TRUE | FALSE | 14.47 |
| P0DJI9 | 37  | BAYSDMBEANYI | FALSE | TRUE | FALSE | 25.43 |
| P0DJI9 | 38  | AYSDMBEANYIG | FALSE | TRUE | FALSE | 24.48 |
| P0DJI9 | 39  | YSDMBEANYIGS | FALSE | TRUE | FALSE | 21.66 |
| P0DJI9 | 41  | DMBEANYIGSDK | FALSE | TRUE | FALSE | 14.4  |
| P0DJI9 | 42  | MBEANYIGSDKY | FALSE | TRUE | FALSE | 20.6  |
| P0DJI9 | 43  | BEANYIGSDKYF | FALSE | TRUE | FALSE | 12.84 |
| P0DJI9 | 46  | NYIGSDKYFHAB | FALSE | TRUE | FALSE | 14.88 |
| P0DJI9 | 47  | YIGSDKYFHABG | FALSE | TRUE | FALSE | 16.34 |
| P0DJI9 | 48  | IGSDKYFHABGN | FALSE | TRUE | FALSE | 23.62 |
| P0DJI9 | 49  | GSDKYFHABGNY | FALSE | TRUE | FALSE | 26.87 |
| P0DJI9 | 50  | SDKYFHABGNYD | FALSE | TRUE | FALSE | 37.86 |
| P0DJI9 | 51  | DKYFHABGNYDA | FALSE | TRUE | FALSE | 34.16 |
| P0DJI9 | 52  | KYFHABGNYDAA | FALSE | TRUE | FALSE | 20.22 |
| P0DJI9 | 53  | YFHABGNYDAAK | FALSE | TRUE | FALSE | 28.93 |
| P0DJI9 | 54  | FHABGNYDAAKB | FALSE | TRUE | FALSE | 30.57 |
| P0DJI9 | 55  | HABGNYDAAKBG | FALSE | TRUE | FALSE | 39.64 |
| P0DJI9 | 56  | ABGNYDAAKBGP | FALSE | TRUE | FALSE | 31.49 |
| P0DJI9 | 57  | BGNYDAAKBGPG | FALSE | TRUE | FALSE | 26.47 |
| P0DJI9 | 58  | GNYDAAKBGPGG | FALSE | TRUE | FALSE | 10.28 |
| P0DJI9 | 60  | YDAAKBGPGGAW | FALSE | TRUE | FALSE | 14.33 |
| P0DJI9 | 74  | EVISNABENIQB | FALSE | TRUE | FALSE | 10.48 |
| P0DJI9 | 75  | VISNABENIQBL | FALSE | TRUE | FALSE | 20.78 |
| P0DJI9 | 76  | ISNABENIQBLT | FALSE | TRUE | FALSE | 24.52 |
| P0DJI9 | 77  | SNABENIQBLTG | FALSE | TRUE | FALSE | 32.36 |
| P0DJI9 | 78  | NABENIQBLTGB | FALSE | TRUE | FALSE | 40.34 |
| P0DJI9 | 79  | ABENIQBLTGBG | FALSE | TRUE | FALSE | 46.9  |
| P0DJI9 | 80  | BENIQBLTGBGA | FALSE | TRUE | FALSE | 56.63 |
| P0DJI9 | 81  | ENIQBLTGBGAE | FALSE | TRUE | FALSE | 23.66 |
| P0DJI9 | 82  | NIQBLTGBGAED | FALSE | TRUE | FALSE | 27.79 |
| P0DJI9 | 83  | IQBLTGBGAEDS | FALSE | TRUE | FALSE | 37.48 |
| P0DJI9 | 84  | QBLTGBGAEDSL | FALSE | TRUE | FALSE | 40.59 |
| P0DJI9 | 85  | BLTGBGAEDSLA | FALSE | TRUE | FALSE | 26.44 |
| P0DJI9 | 86  | LTGBGAEDSLAD | FALSE | TRUE | FALSE | 22.39 |
| P0DJI9 | 87  | TGBGAEDSLADQ | FALSE | TRUE | FALSE | 16.28 |
| P0DJI9 | 94  | SLADQAANKWGB | FALSE | TRUE | FALSE | 17.34 |
| P0DJI9 | 96  | ADQAANKWGBSG | FALSE | TRUE | FALSE | 13.79 |
| P0DJI9 | 97  | DQAANKWGBSGB | FALSE | TRUE | FALSE | 19.1  |
| P0DJI9 | 98  | QAANKWGBSGBD | FALSE | TRUE | FALSE | 26.7  |
| P0DJI9 | 99  | AANKWGBSGBDP | FALSE | TRUE | FALSE | 32.86 |
| P0DJI9 | 100 | ANKWGBSGBDPN | FALSE | TRUE | FALSE | 29.66 |
| P0DJI9 | 101 | NKWGBSGBDPNH | FALSE | TRUE | FALSE | 27.42 |
| P0DJI9 | 102 | KWGBSGBDPNHF | FALSE | TRUE | FALSE | 30.88 |
| P0DJI9 | 103 | WGBSGBDPNHFB | FALSE | TRUE | FALSE | 27.6  |
| P0DJI9 | 104 | GBSGBDPNHFBP | FALSE | TRUE | FALSE | 33.4  |
| P0DJI9 | 105 | BSGBDPNHFBPA | FALSE | TRUE | FALSE | 17.22 |
| Q14765 | 103 | VVISNCLBEEBB | FALSE | TRUE | FALSE | 10.15 |
| Q14765 | 104 | VISNCLBEEBBI | FALSE | TRUE | FALSE | 11.16 |

|        |     |               |       |      |       |       |
|--------|-----|---------------|-------|------|-------|-------|
| Q14765 | 105 | ISNCLBEEBBIL  | FALSE | TRUE | FALSE | 12.39 |
| Q14765 | 106 | SNCLBEEBBILA  | FALSE | TRUE | FALSE | 12.32 |
| Q14765 | 109 | LBEEBBILAAAN  | FALSE | TRUE | FALSE | 11.88 |
| Q14765 | 130 | SLQSSSVSEBQB  | FALSE | TRUE | FALSE | 12    |
| Q14765 | 131 | LQSSSVSEBQBN  | FALSE | TRUE | FALSE | 11.65 |
| Q14765 | 132 | QSSSVSEBQBNV  | FALSE | TRUE | FALSE | 13.34 |
| Q14765 | 133 | SSSVSEBQBNVE  | FALSE | TRUE | FALSE | 10.76 |
| Q14765 | 136 | VSEBQBNVEHKV  | FALSE | TRUE | FALSE | 10.91 |
| Q14765 | 166 | DLQDEFDYBYKT  | FALSE | TRUE | FALSE | 10.09 |
| Q14765 | 167 | LQDEFDYBYKTI  | FALSE | TRUE | FALSE | 12.62 |
| Q14765 | 168 | QDEFDYBYKTIQ  | FALSE | TRUE | FALSE | 14.57 |
| Q14765 | 169 | DEFDYBYKTIQT  | FALSE | TRUE | FALSE | 14.63 |
| Q14765 | 170 | EFDYBYKTIQTM  | FALSE | TRUE | FALSE | 17.21 |
| Q14765 | 171 | FDYBYKTIQTM   | FALSE | TRUE | FALSE | 14.55 |
| Q14765 | 231 | LIEELQDWKBBQ  | FALSE | TRUE | FALSE | 13.77 |
| Q14765 | 232 | IEELQDWKBBQQ  | FALSE | TRUE | FALSE | 15.63 |
| Q14765 | 233 | EELQDWKBBQQI  | FALSE | TRUE | FALSE | 28.71 |
| Q14765 | 234 | ELQDWKBBQQIA  | FALSE | TRUE | FALSE | 32.84 |
| Q14765 | 235 | LQDWKBBQQIAC  | FALSE | TRUE | FALSE | 38.2  |
| Q14765 | 236 | QDWKBBQQIACI  | FALSE | TRUE | FALSE | 51.03 |
| Q14765 | 237 | DWKBBQQIACIG  | FALSE | TRUE | FALSE | 52.9  |
| Q14765 | 238 | WKBBQQIACIGG  | FALSE | TRUE | FALSE | 32.65 |
| Q14765 | 240 | BBQQIACIGGPL  | FALSE | TRUE | FALSE | 22.55 |
| Q14765 | 264 | LLAESLFQLBBQ  | FALSE | TRUE | FALSE | 19.19 |
| Q14765 | 265 | LAESLFQLBBQL  | FALSE | TRUE | FALSE | 18.09 |
| Q14765 | 266 | AESLFQLBBQLE  | FALSE | TRUE | FALSE | 21.47 |
| Q14765 | 267 | ESLFQLBBQLEK  | FALSE | TRUE | FALSE | 39.97 |
| Q14765 | 268 | SLFQLBBQLEKL  | FALSE | TRUE | FALSE | 18.7  |
| Q14765 | 269 | LFQLBBQLEKLE  | FALSE | TRUE | FALSE | 48.05 |
| Q14765 | 270 | FQLBBQLEKLEE  | FALSE | TRUE | FALSE | 57.73 |
| Q14765 | 271 | QLBBQLEKLEEQ  | FALSE | TRUE | FALSE | 33.87 |
| Q14765 | 272 | LBBQLEKLEEQS  | FALSE | TRUE | FALSE | 29.42 |
| Q14765 | 273 | BBQLEKLEEQST  | FALSE | TRUE | FALSE | 32.11 |
| Q14765 | 319 | EBQPCMPHTHPQB | FALSE | TRUE | FALSE | 11.27 |
| Q14765 | 363 | IDKNVSTLSNBB  | FALSE | TRUE | FALSE | 11.81 |
| Q14765 | 395 | LSVEFBHLQPKE  | FALSE | TRUE | FALSE | 22.5  |
| Q14765 | 396 | SVEFBHLQPKEM  | FALSE | TRUE | FALSE | 29.36 |
| Q14765 | 397 | VEFBHLQPKEMK  | FALSE | TRUE | FALSE | 14.98 |
| Q14765 | 398 | EFBHLQPKEMKS  | FALSE | TRUE | FALSE | 10.12 |
| Q14765 | 498 | MSWQFSSYVGBG  | FALSE | TRUE | FALSE | 20.13 |
| Q14765 | 499 | SWQFSSYVGBGL  | FALSE | TRUE | FALSE | 17.2  |
| Q14765 | 500 | WQFSSYVGBGLN  | FALSE | TRUE | FALSE | 24.51 |
| Q14765 | 501 | QFSSYVGBGLNS  | FALSE | TRUE | FALSE | 36.09 |
| Q14765 | 502 | FSSYVGBGLNSD  | FALSE | TRUE | FALSE | 40.04 |
| Q14765 | 503 | SSYVGBGLNSDQ  | FALSE | TRUE | FALSE | 59.59 |
| Q14765 | 504 | SYVGBGLNSDQL  | FALSE | TRUE | FALSE | 57.72 |
| Q14765 | 505 | YVGBGLNSDQLH  | FALSE | TRUE | FALSE | 40.54 |
| Q14765 | 506 | VGBGLNSDQLHM  | FALSE | TRUE | FALSE | 20.68 |
| Q14765 | 507 | GBGLNSDQLHML  | FALSE | TRUE | FALSE | 11.01 |
| Q14765 | 621 | BFHSVEPYNKGB  | FALSE | TRUE | FALSE | 19.14 |
| Q14765 | 625 | VEPYNKGBLSAL  | FALSE | TRUE | FALSE | 11.83 |
| Q14765 | 626 | EPYNKGBLSALP  | FALSE | TRUE | FALSE | 11.97 |

|        |     |              |       |      |       |       |
|--------|-----|--------------|-------|------|-------|-------|
| Q14765 | 629 | NKGBLSALPFAD | FALSE | TRUE | FALSE | 14.62 |
| Q14765 | 631 | GBLSALPFADIL | FALSE | TRUE | FALSE | 12.2  |
| Q14765 | 682 | VSBPTEBGDKGY | FALSE | TRUE | FALSE | 20.57 |
| Q14765 | 683 | SBPTEBGDKGYV | FALSE | TRUE | FALSE | 19.87 |
| Q14765 | 686 | TEBGDKGYVPSV | FALSE | TRUE | FALSE | 16.97 |
| Q14765 | 687 | EBGDKGYVPSVF | FALSE | TRUE | FALSE | 10.75 |
| Q14765 | 724 | VYAVLBENLSPT | FALSE | TRUE | FALSE | 20.04 |
| Q14765 | 725 | YAVLBENLSPTT | FALSE | TRUE | FALSE | 28.18 |
| Q14765 | 726 | AVLBENLSPTTI | FALSE | TRUE | FALSE | 14.1  |
| Q14765 | 727 | VLBENLSPTTIE | FALSE | TRUE | FALSE | 10.6  |
| P24821 | 28  | VIBHKBQSGVNA | FALSE | TRUE | FALSE | 11.93 |
| P24821 | 29  | IBHKBQSGVNAT | FALSE | TRUE | FALSE | 11.77 |
| P24821 | 100 | FTHBINIPBBAC | FALSE | TRUE | FALSE | 12.18 |
| P24821 | 143 | GAGCCLQPATGB | FALSE | TRUE | FALSE | 16.05 |
| P24821 | 144 | AGCCLQPATGBL | FALSE | TRUE | FALSE | 10.8  |
| P24821 | 147 | CLQPATGBLDTB | FALSE | TRUE | FALSE | 20.17 |
| P24821 | 148 | LQPATGBLDTBP | FALSE | TRUE | FALSE | 10.59 |
| P24821 | 149 | QPATGBLDTBPF | FALSE | TRUE | FALSE | 12.22 |
| P24821 | 153 | GBLDTBPFCSGB | FALSE | TRUE | FALSE | 18.67 |
| P24821 | 154 | BLDTBPFCSGBG | FALSE | TRUE | FALSE | 17.96 |
| P24821 | 155 | LDTBPFCSGBGN | FALSE | TRUE | FALSE | 15.54 |
| P24821 | 156 | DTBPFCSGBGNF | FALSE | TRUE | FALSE | 21.63 |
| P24821 | 157 | TBPFCSGBGNFS | FALSE | TRUE | FALSE | 26    |
| P24821 | 158 | BPFCSGBGNFST | FALSE | TRUE | FALSE | 25.56 |
| P24821 | 159 | PFCSGBGNFSTE | FALSE | TRUE | FALSE | 23.16 |
| P24821 | 160 | FCSGBGNFSTEG | FALSE | TRUE | FALSE | 28.74 |
| P24821 | 161 | CSGBGNFSTEGC | FALSE | TRUE | FALSE | 13.89 |
| P24821 | 162 | SGBGNFSTEGCG | FALSE | TRUE | FALSE | 20.02 |
| P24821 | 188 | PECPGNCHLBGB | FALSE | TRUE | FALSE | 11.67 |
| P24821 | 189 | ECPGNCHLBGBC | FALSE | TRUE | FALSE | 11.03 |
| P24821 | 190 | CPGNCHLBGBCI | FALSE | TRUE | FALSE | 13.34 |
| P24821 | 192 | GNCHLBGBCIDG | FALSE | TRUE | FALSE | 16.9  |
| P24821 | 193 | NCHLBGBCIDGQ | FALSE | TRUE | FALSE | 11.11 |
| P24821 | 195 | HLBGBCIDGQCI | FALSE | TRUE | FALSE | 11.51 |
| P24821 | 196 | LBGBCIDGQCIC | FALSE | TRUE | FALSE | 10.99 |
| P24821 | 242 | YAGADCSBEICP | FALSE | TRUE | FALSE | 10.05 |
| P24821 | 281 | KPLCLNNCYNBG | FALSE | TRUE | FALSE | 12.72 |
| P24821 | 282 | PLCLNNCYNBGB | FALSE | TRUE | FALSE | 18.48 |
| P24821 | 283 | LCLNNCYNBGBC | FALSE | TRUE | FALSE | 17.48 |
| P24821 | 284 | CLNNCYNBGBCV | FALSE | TRUE | FALSE | 13.91 |
| P24821 | 285 | LNNCYNBGBCVE | FALSE | TRUE | FALSE | 16.14 |
| P24821 | 286 | NNCYNBGBCVEN | FALSE | TRUE | FALSE | 18.81 |
| P24821 | 287 | NCYNBGBCVENE | FALSE | TRUE | FALSE | 19.22 |
| P24821 | 288 | CYNBGBCVENE  | FALSE | TRUE | FALSE | 12.42 |
| P24821 | 289 | YNBGBCVENE   | FALSE | TRUE | FALSE | 13.33 |
| P24821 | 318 | DCFDBGBCINGT | FALSE | TRUE | FALSE | 12.34 |
| P24821 | 320 | FDBGBCINGTCY | FALSE | TRUE | FALSE | 11.82 |
| P24821 | 344 | PTCPHACHTQGB | FALSE | TRUE | FALSE | 10.41 |
| P24821 | 375 | KBCPADCHNBGB | FALSE | TRUE | FALSE | 18.59 |
| P24821 | 376 | BCPADCHNBGBC | FALSE | TRUE | FALSE | 14.08 |
| P24821 | 377 | CPADCHNBGBCV | FALSE | TRUE | FALSE | 13.41 |
| P24821 | 379 | ADCHNBGBCVDG | FALSE | TRUE | FALSE | 14.43 |

|        |     |               |       |      |       |       |
|--------|-----|---------------|-------|------|-------|-------|
| P24821 | 380 | DCHNBGBCVDGB  | FALSE | TRUE | FALSE | 10.76 |
| P24821 | 382 | HNBGBCVDGBCE  | FALSE | TRUE | FALSE | 13.55 |
| P24821 | 406 | LKCPNGCSGHGB  | FALSE | TRUE | FALSE | 15.41 |
| P24821 | 435 | SQLBCPNDCHSB  | FALSE | TRUE | FALSE | 10.61 |
| P24821 | 436 | QLBCPNDCHSBG  | FALSE | TRUE | FALSE | 15.84 |
| P24821 | 437 | LBCPNDCHSBGB  | FALSE | TRUE | FALSE | 19.13 |
| P24821 | 438 | BCPNDCHSBGBC  | FALSE | TRUE | FALSE | 15.54 |
| P24821 | 439 | CPNDCHSBGBCV  | FALSE | TRUE | FALSE | 14.17 |
| P24821 | 440 | PNDCHSBGBCVE  | FALSE | TRUE | FALSE | 11.62 |
| P24821 | 441 | NDCHSBGBCVEG  | FALSE | TRUE | FALSE | 16.14 |
| P24821 | 442 | DCHSBGBCVEGK  | FALSE | TRUE | FALSE | 28.77 |
| P24821 | 443 | CHSBGBCVEGKC  | FALSE | TRUE | FALSE | 18.87 |
| P24821 | 444 | HSBGBCVEGKCV  | FALSE | TRUE | FALSE | 19.56 |
| P24821 | 445 | SBGBCVEGKCVC  | FALSE | TRUE | FALSE | 13.42 |
| P24821 | 468 | MSCPNDCHQHGB  | FALSE | TRUE | FALSE | 10.52 |
| P24821 | 492 | TGEDCBDBQCPB  | FALSE | TRUE | FALSE | 11.8  |
| P24821 | 493 | GEDCBDBQCPBD  | FALSE | TRUE | FALSE | 10.18 |
| P24821 | 497 | BDBQCPBDCSNB  | FALSE | TRUE | FALSE | 12.98 |
| P24821 | 498 | DBQCPBDCSNBG  | FALSE | TRUE | FALSE | 21.21 |
| P24821 | 499 | BQCPBDCSNBGL  | FALSE | TRUE | FALSE | 21.95 |
| P24821 | 503 | BDCSNBGLCVDG  | FALSE | TRUE | FALSE | 15.09 |
| P24821 | 504 | DCSNBGLCVDGQ  | FALSE | TRUE | FALSE | 13.54 |
| P24821 | 530 | LSCPNDCHGQGB  | FALSE | TRUE | FALSE | 10.43 |
| P24821 | 561 | QBCPSDCHGQGB  | FALSE | TRUE | FALSE | 16.43 |
| P24821 | 705 | SABVATYLPAPE  | FALSE | TRUE | FALSE | 12.52 |
| P24821 | 752 | EDEGEITKSLBB  | FALSE | TRUE | FALSE | 11.41 |
| P24821 | 758 | TKSLBBPETSYP  | FALSE | TRUE | FALSE | 17.23 |
| P24821 | 759 | KSLBBPETSYPBQ | FALSE | TRUE | FALSE | 24.87 |
| P24821 | 760 | SLBBPETSYPBQT | FALSE | TRUE | FALSE | 38.88 |
| P24821 | 761 | LBBPETSYPBQTG | FALSE | TRUE | FALSE | 39.14 |
| P24821 | 762 | BBPETSYPBQTGL | FALSE | TRUE | FALSE | 40.71 |
| P24821 | 763 | BPETSYPBQTGLA | FALSE | TRUE | FALSE | 31.95 |
| P24821 | 764 | PETSYPBQTGLAP | FALSE | TRUE | FALSE | 12.43 |
| P24821 | 765 | ETSYBQTGLAPG  | FALSE | TRUE | FALSE | 27.66 |
| P24821 | 766 | TSYBQTGLAPGQ  | FALSE | TRUE | FALSE | 36.79 |
| P24821 | 767 | SYBQTGLAPGQE  | FALSE | TRUE | FALSE | 29.78 |
| P24821 | 768 | YBQTGLAPGQEY  | FALSE | TRUE | FALSE | 22.67 |
| P24821 | 769 | BQTGLAPGQEYE  | FALSE | TRUE | FALSE | 13.97 |
| P24821 | 788 | NNTBGPGLKBVT  | FALSE | TRUE | FALSE | 13.57 |
| P24821 | 789 | NTBGPGLKBVTT  | FALSE | TRUE | FALSE | 14.18 |
| P24821 | 790 | TBGPGLKBVTTT  | FALSE | TRUE | FALSE | 22.18 |
| P24821 | 791 | BGPGLKBVTTTB  | FALSE | TRUE | FALSE | 29.07 |
| P24821 | 792 | GPGLKBVTTTBL  | FALSE | TRUE | FALSE | 11.63 |
| P24821 | 793 | PGLKBVTTTBLD  | FALSE | TRUE | FALSE | 11.33 |
| P24821 | 794 | GLKBVTTTBLDA  | FALSE | TRUE | FALSE | 14.29 |
| P24821 | 796 | KBVTTTBLDAPS  | FALSE | TRUE | FALSE | 11    |
| P24821 | 797 | BVTTTBLDAPSQ  | FALSE | TRUE | FALSE | 14.29 |
| P24821 | 866 | DTEYEVSLISBB  | FALSE | TRUE | FALSE | 17.06 |
| P24821 | 867 | TEYEVSLISBBG  | FALSE | TRUE | FALSE | 31.06 |
| P24821 | 868 | EYEVSLISBBGD  | FALSE | TRUE | FALSE | 42.74 |
| P24821 | 869 | YEVSLISBBGDM  | FALSE | TRUE | FALSE | 52.53 |
| P24821 | 870 | EVSLISBBGDMS  | FALSE | TRUE | FALSE | 60.78 |

|        |      |               |       |      |       |        |
|--------|------|---------------|-------|------|-------|--------|
| P24821 | 871  | VSLISBBGDMSS  | FALSE | TRUE | FALSE | 79.25  |
| P24821 | 872  | SLISBBGDMSSN  | FALSE | TRUE | FALSE | 86.45  |
| P24821 | 873  | LISBBGDMSSNP  | FALSE | TRUE | FALSE | 107.74 |
| P24821 | 874  | ISBBGDMSSNPA  | FALSE | TRUE | FALSE | 83.71  |
| P24821 | 875  | SBBGDMSSNPAK  | FALSE | TRUE | FALSE | 55.71  |
| P24821 | 876  | BBGDMSSNPAKE  | FALSE | TRUE | FALSE | 35.64  |
| P24821 | 889  | FTTGLDAPBNLB  | FALSE | TRUE | FALSE | 13.09  |
| P24821 | 890  | TTGLDAPBNLBB  | FALSE | TRUE | FALSE | 16.14  |
| P24821 | 891  | TGLDAPBNLBVV  | FALSE | TRUE | FALSE | 12.55  |
| P24821 | 892  | GLDAPBNLBVVS  | FALSE | TRUE | FALSE | 14.28  |
| P24821 | 893  | LDAPBNLBVVSQ  | FALSE | TRUE | FALSE | 15.2   |
| P24821 | 894  | DAPBNLBVVSQT  | FALSE | TRUE | FALSE | 17.9   |
| P24821 | 895  | APBNLBVVSQTD  | FALSE | TRUE | FALSE | 23.63  |
| P24821 | 896  | PBNLBVVSQTDN  | FALSE | TRUE | FALSE | 11.98  |
| P24821 | 897  | BNLBVVSQTDNS  | FALSE | TRUE | FALSE | 32.38  |
| P24821 | 898  | NLBVVSQTDNSI  | FALSE | TRUE | FALSE | 13.99  |
| P24821 | 899  | LBBVVSQTDNSIT | FALSE | TRUE | FALSE | 18.12  |
| P24821 | 906  | DNSITLEWBNGK  | FALSE | TRUE | FALSE | 12.1   |
| P24821 | 909  | ITLEWBNGKAAI  | FALSE | TRUE | FALSE | 15.85  |
| P24821 | 910  | TLEWBNGKAAID  | FALSE | TRUE | FALSE | 16.55  |
| P24821 | 911  | LEWBNGKAAIDS  | FALSE | TRUE | FALSE | 29.78  |
| P24821 | 912  | EWBNGKAAIDSY  | FALSE | TRUE | FALSE | 21.38  |
| P24821 | 913  | WBNGKAAIDSYB  | FALSE | TRUE | FALSE | 25.85  |
| P24821 | 914  | BNGKAAIDSYBI  | FALSE | TRUE | FALSE | 10.91  |
| P24821 | 1024 | GQWVGVQLPBNT  | FALSE | TRUE | FALSE | 10.01  |
| P24821 | 1025 | QWVGVQLPBNTT  | FALSE | TRUE | FALSE | 17.05  |
| P24821 | 1026 | WVGVQLPBNTTS  | FALSE | TRUE | FALSE | 11.9   |
| P24821 | 1030 | QLPBNTTSYVLB  | FALSE | TRUE | FALSE | 10.76  |
| P24821 | 1031 | LPBNTTSYVLBG  | FALSE | TRUE | FALSE | 15.88  |
| P24821 | 1032 | PBNTTSYVLBGL  | FALSE | TRUE | FALSE | 11.37  |
| P24821 | 1033 | BNTTSYVLBGLE  | FALSE | TRUE | FALSE | 16.19  |
| P24821 | 1034 | NTTSYVLBGLEP  | FALSE | TRUE | FALSE | 11.16  |
| P24821 | 1035 | TTSYVLBGLEPG  | FALSE | TRUE | FALSE | 18.89  |
| P24821 | 1036 | TSYVLBGLEPGQ  | FALSE | TRUE | FALSE | 22.98  |
| P24821 | 1037 | SYVLBGLEPGQE  | FALSE | TRUE | FALSE | 23.66  |
| P24821 | 1038 | YVLBGLEPGQEY  | FALSE | TRUE | FALSE | 24.09  |
| P24821 | 1039 | VLBGLEPGQEYN  | FALSE | TRUE | FALSE | 12.02  |
| P24821 | 1040 | LBGLEPGQEYNV  | FALSE | TRUE | FALSE | 15.58  |
| P24821 | 1041 | BGLEPGQEYNVL  | FALSE | TRUE | FALSE | 10.52  |
| P24821 | 1215 | GGLBSTDLPGLK  | FALSE | TRUE | FALSE | 12.06  |
| P24821 | 1216 | GLBSTDLPGLKA  | FALSE | TRUE | FALSE | 13.41  |
| P24821 | 1230 | HYTITIBGVTQD  | FALSE | TRUE | FALSE | 12.06  |
| P24821 | 1231 | YTITIBGVTQDF  | FALSE | TRUE | FALSE | 10.7   |
| P24821 | 1232 | TITIBGVTQDFS  | FALSE | TRUE | FALSE | 19.55  |
| P24821 | 1233 | ITIBGVTQDFST  | FALSE | TRUE | FALSE | 24.72  |
| P24821 | 1234 | TIBGVTQDFSTT  | FALSE | TRUE | FALSE | 17.14  |
| P24821 | 1235 | IBGVTQDFSTTP  | FALSE | TRUE | FALSE | 22.01  |
| P24821 | 1236 | BGVTQDFSTTPL  | FALSE | TRUE | FALSE | 10.65  |
| P24821 | 1307 | SLBSMEIPGLBA  | FALSE | TRUE | FALSE | 10.37  |
| P24821 | 1308 | LBSMEIPGLBAG  | FALSE | TRUE | FALSE | 10.05  |
| P24821 | 1324 | VTLHGEVBGHST  | FALSE | TRUE | FALSE | 12.49  |
| P24821 | 1325 | TLHGEVBGHSTB  | FALSE | TRUE | FALSE | 18.14  |



|        |      |              |       |      |       |       |
|--------|------|--------------|-------|------|-------|-------|
| P24821 | 1326 | LHGEVBGHSTBP | FALSE | TRUE | FALSE | 16.28 |
| P24821 | 1327 | HGEVBGHSTBPL | FALSE | TRUE | FALSE | 20.2  |
| P24821 | 1328 | GEVBGHSTBPLA | FALSE | TRUE | FALSE | 17.09 |
| P24821 | 1329 | EVBGHSTBPLAV | FALSE | TRUE | FALSE | 16.09 |
| P24821 | 1330 | VBGHSTBPLAVE | FALSE | TRUE | FALSE | 14.71 |
| P24821 | 1331 | BGHSTBPLAVEV | FALSE | TRUE | FALSE | 11.57 |
| P24821 | 1417 | IYGVIBGYBTPV | FALSE | TRUE | FALSE | 13.08 |
| P24821 | 1418 | YGVIBGYBTPVL | FALSE | TRUE | FALSE | 12.63 |
| P24821 | 1419 | GVIBGYBTPVLS | FALSE | TRUE | FALSE | 17.4  |
| P24821 | 1420 | VIBGYBTPVLSA | FALSE | TRUE | FALSE | 20.89 |
| P24821 | 1421 | IBGYBTPVLSAE | FALSE | TRUE | FALSE | 25.42 |
| P24821 | 1576 | TLSGTQBKLELB | FALSE | TRUE | FALSE | 21.39 |
| P24821 | 1577 | LSGTQBKLELBG | FALSE | TRUE | FALSE | 31.19 |
| P24821 | 1578 | SGTQBKLELBGL | FALSE | TRUE | FALSE | 40.21 |
| P24821 | 1579 | GTQBKLELBGLI | FALSE | TRUE | FALSE | 35.56 |
| P24821 | 1580 | TQBKLELBGLIT | FALSE | TRUE | FALSE | 48.17 |
| P24821 | 1581 | QBKLELBGLITG | FALSE | TRUE | FALSE | 39.21 |
| P24821 | 1582 | BKLELBGLITGI | FALSE | TRUE | FALSE | 21.28 |
| P24821 | 1583 | KLELBGLITGIG | FALSE | TRUE | FALSE | 17.68 |
| P24821 | 1654 | IBDTKKQSEPLE | FALSE | TRUE | FALSE | 12.77 |
| P24821 | 1670 | APEBTBDITGLB | FALSE | TRUE | FALSE | 11.72 |
| P24821 | 1671 | PEBTBDITGLBE | FALSE | TRUE | FALSE | 13.68 |
| P24821 | 1672 | EBTBDITGLBEA | FALSE | TRUE | FALSE | 12.45 |
| P24821 | 1673 | BTBDITGLBEAT | FALSE | TRUE | FALSE | 31.91 |
| P24821 | 1674 | TBDITGLBEATE | FALSE | TRUE | FALSE | 18.88 |
| P24821 | 1675 | BDITGLBEATEY | FALSE | TRUE | FALSE | 15.86 |
| P24821 | 1676 | DITGLBEATEYE | FALSE | TRUE | FALSE | 15.11 |
| P24821 | 1677 | ITGLBEATEYEI | FALSE | TRUE | FALSE | 15.57 |
| P24821 | 1678 | TGLBEATEYEIE | FALSE | TRUE | FALSE | 13.63 |
| P24821 | 1686 | YEIELYGISKGB | FALSE | TRUE | FALSE | 23.19 |
| P24821 | 1687 | EIELYGISKGBB | FALSE | TRUE | FALSE | 23.8  |
| P24821 | 1688 | IELYGISKGBBS | FALSE | TRUE | FALSE | 12.4  |
| P24821 | 1689 | ELYGISKGBBSQ | FALSE | TRUE | FALSE | 16.2  |
| P24821 | 1691 | YGISKGBBSQTV | FALSE | TRUE | FALSE | 14.26 |
| P24821 | 1696 | GBBSQTVSAIAT | FALSE | TRUE | FALSE | 12.39 |
| P24821 | 1730 | WBAPTAQVESFB | FALSE | TRUE | FALSE | 12.53 |
| P24821 | 1814 | EALABWQPAIAT | FALSE | TRUE | FALSE | 13.45 |
| P24821 | 1815 | ALABWQPAIATV | FALSE | TRUE | FALSE | 15.82 |
| P24821 | 1816 | LABWQPAIATVD | FALSE | TRUE | FALSE | 21.78 |
| P24821 | 1904 | LLTWBPPBASVT | FALSE | TRUE | FALSE | 10.67 |
| P24821 | 1905 | LTWBPPBASVTG | FALSE | TRUE | FALSE | 13.62 |
| P24821 | 1906 | TWBPPBASVTGY | FALSE | TRUE | FALSE | 15.9  |
| P24821 | 1907 | WBPPBASVTGYL | FALSE | TRUE | FALSE | 10.94 |
| P24821 | 2024 | IVFLBBKNGBEN | FALSE | TRUE | FALSE | 12.13 |
| P24821 | 2025 | VFLBBKNGBENF | FALSE | TRUE | FALSE | 36.53 |
| P24821 | 2026 | FLBBKNGBENFY | FALSE | TRUE | FALSE | 45.23 |
| P24821 | 2027 | LBBKNGBENFYQ | FALSE | TRUE | FALSE | 36.76 |
| P24821 | 2028 | BBKNGBENFYQN | FALSE | TRUE | FALSE | 30.43 |
| P24821 | 2029 | BKNGBENFYQNW | FALSE | TRUE | FALSE | 22.5  |
| P24821 | 2031 | NGBENFYQNWKA | FALSE | TRUE | FALSE | 14.1  |
| P24821 | 2032 | GBENFYQNWKAY | FALSE | TRUE | FALSE | 16.22 |
| P24821 | 2040 | WKAYAAGFGDBB | FALSE | TRUE | FALSE | 12.42 |

|        |      |               |       |      |       |       |
|--------|------|---------------|-------|------|-------|-------|
| P24821 | 2041 | KAYAAGFGDBBE  | FALSE | TRUE | FALSE | 18.21 |
| P24821 | 2042 | AYAAGFGDBBEE  | FALSE | TRUE | FALSE | 15.71 |
| P24821 | 2043 | YAAGFGDBBEEF  | FALSE | TRUE | FALSE | 13.8  |
| P24821 | 2044 | AAGFGDBBEEFW  | FALSE | TRUE | FALSE | 11.57 |
| P24821 | 2045 | AGFGDBBEEFWL  | FALSE | TRUE | FALSE | 11.87 |
| P24821 | 2046 | GFGDBBEEFWLG  | FALSE | TRUE | FALSE | 10.84 |
| P24821 | 2047 | FGDBBEEFWLGL  | FALSE | TRUE | FALSE | 11.91 |
| P24821 | 2049 | DBBEEFWLGLDN  | FALSE | TRUE | FALSE | 11.44 |
| P24821 | 2062 | NKITAQQQYELB  | FALSE | TRUE | FALSE | 20.79 |
| P24821 | 2063 | KITAQQQYELBV  | FALSE | TRUE | FALSE | 16.8  |
| P24821 | 2066 | AQQQYELBVDLB  | FALSE | TRUE | FALSE | 19.33 |
| P24821 | 2067 | QQQYELBVDLBD  | FALSE | TRUE | FALSE | 15.66 |
| P24821 | 2068 | GQYELBVDLBDH  | FALSE | TRUE | FALSE | 11.63 |
| P24821 | 2069 | QYELBVDLBDHG  | FALSE | TRUE | FALSE | 13.95 |
| P24821 | 2070 | YELBVDLBDHGE  | FALSE | TRUE | FALSE | 11.28 |
| P24821 | 2072 | LBVDLBDHGETA  | FALSE | TRUE | FALSE | 18.3  |
| P24821 | 2073 | BVDLBDHGETAF  | FALSE | TRUE | FALSE | 16.82 |
| P24821 | 2109 | TAGDSMAYHNGB  | FALSE | TRUE | FALSE | 13.12 |
| P24821 | 2117 | HNGBSFSTFDKD  | FALSE | TRUE | FALSE | 12    |
| P24821 | 2119 | GBSFSTFDKDTD  | FALSE | TRUE | FALSE | 10.84 |
| P24821 | 2146 | YBNCHBVNLMGB  | FALSE | TRUE | FALSE | 15.13 |
| P24821 | 2147 | BNCHBVNLMGBY  | FALSE | TRUE | FALSE | 15.08 |
| P24821 | 2148 | NCHBVNLMGBYG  | FALSE | TRUE | FALSE | 11.07 |
| P24821 | 2149 | CHBVNLMGBYGD  | FALSE | TRUE | FALSE | 10    |
| P24821 | 2150 | HBVNLMGBYGDN  | FALSE | TRUE | FALSE | 18.41 |
| P24821 | 2151 | BVNLMGBYGDNN  | FALSE | TRUE | FALSE | 19.62 |
| P24821 | 2154 | LMGBYGDNNHSQ  | FALSE | TRUE | FALSE | 16.41 |
| P24821 | 2156 | GBYGDNNHSQGV  | FALSE | TRUE | FALSE | 10.97 |
| P24821 | 2181 | FAEMKLBPSNFB  | FALSE | TRUE | FALSE | 10.06 |
| P24821 | 2184 | MKLBPSNFBNLE  | FALSE | TRUE | FALSE | 12.96 |
| P24821 | 2185 | KLBPNSNFBNLEG | FALSE | TRUE | FALSE | 14.35 |
| P24821 | 2186 | LBPSNFBNLEGB  | FALSE | TRUE | FALSE | 18.68 |
| P24821 | 2187 | BPSNFBNLEGBB  | FALSE | TRUE | FALSE | 24.57 |
| P24821 | 2188 | PSNFBNLEGBBK  | FALSE | TRUE | FALSE | 20.87 |
| P24821 | 2189 | SNFBNLEGBBKB  | FALSE | TRUE | FALSE | 46.59 |
| P24821 | 2190 | NFBNLEGBBKBA  | FALSE | TRUE | FALSE | 21.56 |
| P37802 | 1    | MANBGPAYGLSB  | FALSE | TRUE | FALSE | 23.39 |
| P37802 | 2    | ANBGPAYGLSBE  | FALSE | TRUE | FALSE | 71.02 |
| P37802 | 3    | NBGPAYGLSBEV  | FALSE | TRUE | FALSE | 44.12 |
| P37802 | 4    | BGPAYGLSBEVQ  | FALSE | TRUE | FALSE | 39.54 |
| P37802 | 5    | GPAYGLSBEVQQ  | FALSE | TRUE | FALSE | 10.09 |
| P37802 | 6    | PAYGLSBEVQQK  | FALSE | TRUE | FALSE | 18.39 |
| P37802 | 7    | AYGLSBEVQQKI  | FALSE | TRUE | FALSE | 18.96 |
| P37802 | 8    | YGLSBEVQQKIE  | FALSE | TRUE | FALSE | 38.88 |
| P37802 | 9    | GLSBEVQQKIEK  | FALSE | TRUE | FALSE | 13.12 |
| P37802 | 10   | LSBEVQQKIEKQ  | FALSE | TRUE | FALSE | 28.41 |
| P37802 | 33   | WITTQCBKDVGB  | FALSE | TRUE | FALSE | 13.37 |
| P37802 | 38   | CBKDVGBPQPGB  | FALSE | TRUE | FALSE | 17.12 |
| P37802 | 39   | BKDVGBPQPGBE  | FALSE | TRUE | FALSE | 15.42 |
| P37802 | 42   | VGBPQPGBENFQ  | FALSE | TRUE | FALSE | 14.08 |
| P37802 | 43   | GBPQPGBENFQN  | FALSE | TRUE | FALSE | 14.68 |
| P37802 | 44   | BPQPGBENFQNW  | FALSE | TRUE | FALSE | 14.67 |

|        |     |               |       |      |       |       |
|--------|-----|---------------|-------|------|-------|-------|
| P37802 | 46  | QPGBENFQNWLK  | FALSE | TRUE | FALSE | 15.42 |
| P37802 | 47  | PGBENFQNWLKD  | FALSE | TRUE | FALSE | 10.03 |
| P37802 | 48  | GBENFQNWLKDG  | FALSE | TRUE | FALSE | 13.68 |
| P37802 | 138 | ABDDGLFSGDPN  | FALSE | TRUE | FALSE | 10.15 |
| P37802 | 173 | VIGLQMGTNBGA  | FALSE | TRUE | FALSE | 10.87 |
| P37802 | 175 | GLQMGTNBGASQ  | FALSE | TRUE | FALSE | 13.1  |
| P37802 | 177 | QMGTNBGASQAG  | FALSE | TRUE | FALSE | 15.56 |
| P37802 | 178 | MGTNBGASQAGM  | FALSE | TRUE | FALSE | 18.72 |
| P37802 | 179 | GTNBGASQAGMT  | FALSE | TRUE | FALSE | 22.59 |
| P37802 | 180 | TNBGASQAGMTG  | FALSE | TRUE | FALSE | 22.24 |
| P37802 | 181 | NBGASQAGMTGY  | FALSE | TRUE | FALSE | 26.36 |
| P37802 | 182 | BGASQAGMTGYG  | FALSE | TRUE | FALSE | 14.56 |
| P37802 | 186 | QAGMTGYGMPBQ  | FALSE | TRUE | FALSE | 14.62 |
| P37802 | 187 | AGMTGYGMPBQI  | FALSE | TRUE | FALSE | 10.08 |
| P37802 | 188 | GMTGYGMPBQIL  | FALSE | TRUE | FALSE | 10.48 |
| P68363 | 73  | TVIDEVBGTGYB  | FALSE | TRUE | FALSE | 17.64 |
| P68363 | 74  | VIDEVBGTGYBQ  | FALSE | TRUE | FALSE | 29.26 |
| P68363 | 75  | IDEVBGTGYBQL  | FALSE | TRUE | FALSE | 30.93 |
| P68363 | 76  | DEVBTGTGYBQLF | FALSE | TRUE | FALSE | 24.64 |
| P68363 | 77  | EVBTGTGYBQLFH | FALSE | TRUE | FALSE | 25.13 |
| P68363 | 78  | VBTGTGYBQLFHP | FALSE | TRUE | FALSE | 13.6  |
| P68363 | 79  | BTGTGYBQLFHPE | FALSE | TRUE | FALSE | 26.6  |
| P68363 | 80  | TGTGYBQLFHPEQ | FALSE | TRUE | FALSE | 19.03 |
| P68363 | 81  | GTYBQLFHPEQL  | FALSE | TRUE | FALSE | 18.92 |
| P68363 | 82  | TYBQLFHPEQLI  | FALSE | TRUE | FALSE | 10.78 |
| P68363 | 83  | YBQLFHPEQLIT  | FALSE | TRUE | FALSE | 10.06 |
| P68363 | 95  | GKEDAANNYABG  | FALSE | TRUE | FALSE | 12.09 |
| P68363 | 96  | KEDAANNYABGH  | FALSE | TRUE | FALSE | 12.04 |
| P68363 | 97  | EDAANNYABGHY  | FALSE | TRUE | FALSE | 16.43 |
| P68363 | 98  | DAANNYABGHYT  | FALSE | TRUE | FALSE | 29.66 |
| P68363 | 99  | AANNYABGHYTI  | FALSE | TRUE | FALSE | 18.16 |
| P68363 | 100 | ANNYABGHYTIG  | FALSE | TRUE | FALSE | 20.61 |
| P68363 | 102 | NYABGHYTIGKE  | FALSE | TRUE | FALSE | 28.09 |
| P68363 | 103 | YABGHYTIGKEI  | FALSE | TRUE | FALSE | 30.04 |
| P68363 | 121 | BIBKLADQCTGL  | FALSE | TRUE | FALSE | 11.7  |
| P68363 | 204 | VDNEAIYDICBB  | FALSE | TRUE | FALSE | 10.52 |
| P68363 | 210 | YDICBBNLDIEB  | FALSE | TRUE | FALSE | 12.43 |
| P68363 | 211 | DICBBNLDIEBP  | FALSE | TRUE | FALSE | 10.06 |
| P68363 | 212 | ICBBNLDIEBPT  | FALSE | TRUE | FALSE | 18.19 |
| P68363 | 213 | CBBNLDIEBPTY  | FALSE | TRUE | FALSE | 18.7  |
| P68363 | 214 | BBNLDIEBPTYT  | FALSE | TRUE | FALSE | 19.13 |
| P68363 | 302 | MVKCDPBHGKYM  | FALSE | TRUE | FALSE | 10.13 |
| P68363 | 306 | DPBHGKYMACCL  | FALSE | TRUE | FALSE | 10.25 |
| P68363 | 311 | KYMACCLLYBGD  | FALSE | TRUE | FALSE | 11.1  |
| P68363 | 312 | YMACCLLYBGDV  | FALSE | TRUE | FALSE | 12.88 |
| P68363 | 313 | MACCLLYBGDVV  | FALSE | TRUE | FALSE | 14.85 |
| P68363 | 315 | CCLLYBGDVVPK  | FALSE | TRUE | FALSE | 19.42 |
| P68363 | 316 | CLLYBGDVVPKD  | FALSE | TRUE | FALSE | 33.02 |
| P68363 | 317 | LLYBGDVVPKDV  | FALSE | TRUE | FALSE | 54.87 |
| P68363 | 318 | LYBGDVVPKDVN  | FALSE | TRUE | FALSE | 37.05 |
| P68363 | 319 | YBGDVVPKDVNA  | FALSE | TRUE | FALSE | 26.87 |
| P68363 | 391 | LDHKFDLMYAKB  | FALSE | TRUE | FALSE | 10.24 |

|        |     |              |       |      |       |       |
|--------|-----|--------------|-------|------|-------|-------|
| P98066 | 30  | WLEBAAGVYHBE | FALSE | TRUE | FALSE | 35.29 |
| P98066 | 31  | LEBAAGVYHBEA | FALSE | TRUE | FALSE | 21.81 |
| P98066 | 32  | EBAAGVYHBEAB | FALSE | TRUE | FALSE | 35.6  |
| P98066 | 33  | BAAGVYHBEABS | FALSE | TRUE | FALSE | 48.76 |
| P98066 | 34  | AAGVYHBEABSG | FALSE | TRUE | FALSE | 51.01 |
| P98066 | 35  | AGVYHBEABSGK | FALSE | TRUE | FALSE | 57.52 |
| P98066 | 36  | GVYHBEABSGKY | FALSE | TRUE | FALSE | 66.93 |
| P98066 | 37  | VYHBEABSGKYK | FALSE | TRUE | FALSE | 11.03 |
| P98066 | 38  | YHBEABSGKYKL | FALSE | TRUE | FALSE | 10.58 |
| P98066 | 39  | HBEABSGKYKLT | FALSE | TRUE | FALSE | 11.45 |
| P98066 | 40  | BEABSGKYKLTY | FALSE | TRUE | FALSE | 11.21 |
| P98066 | 80  | HVCAAGWMAKGB | FALSE | TRUE | FALSE | 15.35 |
| P98066 | 81  | VCAAGWMAKGBV | FALSE | TRUE | FALSE | 10.11 |
| P98066 | 82  | CAAGWMAKGBVG | FALSE | TRUE | FALSE | 11.54 |
| P98066 | 105 | FGKTGIIDYGIB | FALSE | TRUE | FALSE | 11.62 |
| P98066 | 110 | IIDYGIBLNBSE | FALSE | TRUE | FALSE | 15.29 |
| P98066 | 111 | IDYGIBLNBSEB | FALSE | TRUE | FALSE | 19.81 |
| P98066 | 112 | DYGIBLNBSEBW | FALSE | TRUE | FALSE | 17.65 |
| P98066 | 115 | IBLNBSEBWDAY | FALSE | TRUE | FALSE | 10.57 |
| P98066 | 197 | DSYDDVHGFVGB | FALSE | TRUE | FALSE | 13.98 |
| P98066 | 204 | GFVGBYCGDELP | FALSE | TRUE | FALSE | 10.48 |
| Q9Y2R2 | 2   | DQBEILQKFLDE | FALSE | TRUE | FALSE | 10.63 |
| Q9Y2R2 | 3   | QBEILQKFLDEA | FALSE | TRUE | FALSE | 14.86 |
| Q9Y2R2 | 59  | BYKDILPYDYSB | FALSE | TRUE | FALSE | 16.91 |
| Q9Y2R2 | 60  | YKDILPYDYSBV | FALSE | TRUE | FALSE | 10.07 |
| Q9Y2R2 | 161 | EAEKBKSDYIIB | FALSE | TRUE | FALSE | 21.17 |
| Q9Y2R2 | 162 | AEKBKSDYIIBT | FALSE | TRUE | FALSE | 13.96 |
| Q9Y2R2 | 225 | IHCSAGCGBTGV | FALSE | TRUE | FALSE | 10.08 |
| Q9Y2R2 | 226 | HCSAGCGBTGVI | FALSE | TRUE | FALSE | 10    |
| Q9Y2R2 | 257 | SVFSLIBEMBTQ | FALSE | TRUE | FALSE | 16.29 |
| Q9Y2R2 | 258 | VFSLIBEMBTQB | FALSE | TRUE | FALSE | 24.81 |
| Q9Y2R2 | 259 | FSLIBEMBTQBP | FALSE | TRUE | FALSE | 26.05 |
| Q9Y2R2 | 260 | SLIBEMBTQBPS | FALSE | TRUE | FALSE | 17.43 |
| Q9Y2R2 | 261 | LIBEMBTQBPSL | FALSE | TRUE | FALSE | 24.28 |
| Q9Y2R2 | 262 | IBEMBTQBPSLV | FALSE | TRUE | FALSE | 24.56 |
| Q9Y2R2 | 263 | BEMBTQBPSLVQ | FALSE | TRUE | FALSE | 23.28 |
| Q9Y2R2 | 264 | EMBTQBPSLVQT | FALSE | TRUE | FALSE | 13.35 |
| Q9Y2R2 | 265 | MBTQBPSLVQTQ | FALSE | TRUE | FALSE | 12.14 |
| Q9Y2R2 | 282 | VYNAVLELFKBQ | FALSE | TRUE | FALSE | 10.65 |
| Q9Y2R2 | 285 | AVLELFKBQMDV | FALSE | TRUE | FALSE | 15.94 |
| Q9Y2R2 | 286 | VLELFKBQMDVI | FALSE | TRUE | FALSE | 15.02 |
| Q9Y2R2 | 287 | LELFKBQMDVIB | FALSE | TRUE | FALSE | 24.19 |
| Q9Y2R2 | 288 | ELFKBQMDVIBD | FALSE | TRUE | FALSE | 25.52 |
| Q9Y2R2 | 289 | LFKBQMDVIBDK | FALSE | TRUE | FALSE | 21.66 |
| Q9Y2R2 | 290 | FKBQMDVIBDKH | FALSE | TRUE | FALSE | 26.43 |
| Q9Y2R2 | 292 | BQMDVIBDKHSG | FALSE | TRUE | FALSE | 11.75 |
| Q9Y2R2 | 348 | IKESSSFDFTSE | FALSE | TRUE | FALSE | 10.1  |
| Q9Y2R2 | 349 | KESSSFDFTSEI | FALSE | TRUE | FALSE | 13.7  |
| Q9Y2R2 | 350 | ESSSFDFTSEIS | FALSE | TRUE | FALSE | 13.24 |
| Q9Y2R2 | 351 | SSSFDFTSEISA | FALSE | TRUE | FALSE | 16.1  |
| Q9Y2R2 | 352 | SSFDFTSEISA  | FALSE | TRUE | FALSE | 15.35 |
| Q9Y2R2 | 353 | SFDFTSEISAK  | FALSE | TRUE | FALSE | 12.44 |

|        |     |               |       |      |       |       |
|--------|-----|---------------|-------|------|-------|-------|
| Q9Y2R2 | 354 | FDFBTSEISAKE  | FALSE | TRUE | FALSE | 12.61 |
| Q9Y2R2 | 435 | GBYFNASKVPITB | FALSE | TRUE | FALSE | 12.02 |
| Q9Y2R2 | 442 | VPITBTKSTPFE  | FALSE | TRUE | FALSE | 15    |
| Q9Y2R2 | 452 | FELIQQBETKEV  | FALSE | TRUE | FALSE | 15.05 |
| Q9Y2R2 | 453 | ELIQQBETKEVD  | FALSE | TRUE | FALSE | 10.46 |
| Q9Y2R2 | 454 | LIQQBETKEVDS  | FALSE | TRUE | FALSE | 10.85 |
| Q9Y2R2 | 455 | IQQBETKEVDSK  | FALSE | TRUE | FALSE | 11.9  |
| Q9Y2R2 | 679 | LBSPKSELHQDB  | FALSE | TRUE | FALSE | 13.43 |
| P08670 | 1   | MSTBSVSSSSYB  | FALSE | TRUE | FALSE | 11.4  |
| P08670 | 2   | STBSVSSSSYBB  | FALSE | TRUE | FALSE | 16.2  |
| P08670 | 3   | TBSVSSSSYBBM  | FALSE | TRUE | FALSE | 10.4  |
| P08670 | 7   | SSSSYBBMFGGP  | FALSE | TRUE | FALSE | 13.9  |
| P08670 | 8   | SSSYBBMFGGPG  | FALSE | TRUE | FALSE | 14.79 |
| P08670 | 9   | SSYBBMFGGPGT  | FALSE | TRUE | FALSE | 22.1  |
| P08670 | 10  | SYBBMFGGPGTA  | FALSE | TRUE | FALSE | 21.59 |
| P08670 | 11  | YBBMFGGPGTAS  | FALSE | TRUE | FALSE | 12.97 |
| P08670 | 12  | BBMFGGPGTASB  | FALSE | TRUE | FALSE | 28.41 |
| P08670 | 17  | GPGTASBPSSSB  | FALSE | TRUE | FALSE | 12.02 |
| P08670 | 19  | GTASBPSSSBSY  | FALSE | TRUE | FALSE | 11.02 |
| P08670 | 25  | SSSBSYVTTSTB  | FALSE | TRUE | FALSE | 20.01 |
| P08670 | 26  | SSBSYVTTSTBT  | FALSE | TRUE | FALSE | 16.23 |
| P08670 | 27  | SBSYVTTSTBTY  | FALSE | TRUE | FALSE | 10.03 |
| P08670 | 34  | STBTYSLGSALB  | FALSE | TRUE | FALSE | 10.84 |
| P08670 | 40  | LGSALBPSTSBS  | FALSE | TRUE | FALSE | 12.77 |
| P08670 | 53  | YASSPGGVYATB  | FALSE | TRUE | FALSE | 45.34 |
| P08670 | 54  | ASSPGGVYATBS  | FALSE | TRUE | FALSE | 37.47 |
| P08670 | 55  | SSPGGVYATBSS  | FALSE | TRUE | FALSE | 60.6  |
| P08670 | 56  | SPGGVYATBSSA  | FALSE | TRUE | FALSE | 59.72 |
| P08670 | 57  | PGGVYATBSSAV  | FALSE | TRUE | FALSE | 51.12 |
| P08670 | 58  | GGVYATBSSAVB  | FALSE | TRUE | FALSE | 38.37 |
| P08670 | 59  | GVYATBSSAVBL  | FALSE | TRUE | FALSE | 31.85 |
| P08670 | 60  | VYATBSSAVBLB  | FALSE | TRUE | FALSE | 14.89 |
| P08670 | 61  | YATBSSAVBLBS  | FALSE | TRUE | FALSE | 23.11 |
| P08670 | 62  | ATBSSAVBLBSS  | FALSE | TRUE | FALSE | 15.76 |
| P08670 | 63  | TBSSAVBLBSSV  | FALSE | TRUE | FALSE | 10.67 |
| P08670 | 94  | TEFKNTBTNEKV  | FALSE | TRUE | FALSE | 13.21 |
| P08670 | 95  | EFKNTBTNEKVE  | FALSE | TRUE | FALSE | 10.43 |
| P08670 | 96  | FKNTBTNEKVEL  | FALSE | TRUE | FALSE | 12.54 |
| P08670 | 140 | GQGKSBLGDLYE  | FALSE | TRUE | FALSE | 19.84 |
| P08670 | 141 | QGKSBLGDLYEE  | FALSE | TRUE | FALSE | 15.71 |
| P08670 | 142 | GKSBLGDLYEEE  | FALSE | TRUE | FALSE | 15.65 |
| P08670 | 143 | KSBLGDLYEEEM  | FALSE | TRUE | FALSE | 15.82 |
| P08670 | 144 | SBLGDLYEEEMB  | FALSE | TRUE | FALSE | 11.3  |
| P08670 | 149 | LYEEEMBELBBQ  | FALSE | TRUE | FALSE | 14.43 |
| P08670 | 150 | YEEEMBELBBQV  | FALSE | TRUE | FALSE | 10.25 |
| P08670 | 153 | EMBELBBQVDQL  | FALSE | TRUE | FALSE | 13.21 |
| P08670 | 154 | MBELBBQVDQLT  | FALSE | TRUE | FALSE | 25.04 |
| P08670 | 155 | BELBBQVDQLTN  | FALSE | TRUE | FALSE | 38.52 |
| P08670 | 156 | ELBBQVDQLTND  | FALSE | TRUE | FALSE | 20.43 |
| P08670 | 157 | LBBQVDQLTNDK  | FALSE | TRUE | FALSE | 32.28 |
| P08670 | 158 | BBQVDQLTNDKA  | FALSE | TRUE | FALSE | 26.21 |
| P08670 | 159 | BQVDQLTNDKAB  | FALSE | TRUE | FALSE | 18.59 |

|        |     |              |       |      |       |       |
|--------|-----|--------------|-------|------|-------|-------|
| P08670 | 168 | KABVEVEBDNLA | FALSE | TRUE | FALSE | 10.77 |
| P08670 | 182 | IMBLBEKLQEEM | FALSE | TRUE | FALSE | 14.32 |
| P08670 | 183 | MBLBEKLQEEML | FALSE | TRUE | FALSE | 10.44 |
| P08670 | 184 | BLBEKLQEEMLQ | FALSE | TRUE | FALSE | 14    |
| P08670 | 201 | NTLQSFQBQVDN | FALSE | TRUE | FALSE | 12.69 |
| P08670 | 202 | TLQSFQBQVDNA | FALSE | TRUE | FALSE | 14.21 |
| P08670 | 203 | LQSFQBQVDNAS | FALSE | TRUE | FALSE | 13.6  |
| P08670 | 204 | QSFQBQVDNASL | FALSE | TRUE | FALSE | 19.35 |
| P08670 | 205 | SFBQVDNASLA  | FALSE | TRUE | FALSE | 16.97 |
| P08670 | 206 | FBQVDNASLAB  | FALSE | TRUE | FALSE | 23.2  |
| P08670 | 212 | NASLABLDLEBK | FALSE | TRUE | FALSE | 10.18 |
| P08670 | 213 | ASLABLDLEBKV | FALSE | TRUE | FALSE | 10.87 |
| P08670 | 215 | LABLDLEBKVES | FALSE | TRUE | FALSE | 10.66 |
| P08670 | 266 | TAALBDVBQQYE | FALSE | TRUE | FALSE | 14.67 |
| P08670 | 267 | AALBDVBQQYES | FALSE | TRUE | FALSE | 20.06 |
| P08670 | 268 | ALBDVBQQYESV | FALSE | TRUE | FALSE | 23.91 |
| P08670 | 269 | LBDVBQQYESVA | FALSE | TRUE | FALSE | 18.88 |
| P08670 | 270 | BDVBQQYESVAA | FALSE | TRUE | FALSE | 11.78 |
| P08670 | 271 | DVBQQYESVAAK | FALSE | TRUE | FALSE | 19.45 |
| P08670 | 272 | VBQQYESVAAKN | FALSE | TRUE | FALSE | 17.56 |
| P08670 | 302 | ANBNNDALBQAK | FALSE | TRUE | FALSE | 19.93 |
| P08670 | 303 | NBNNDALBQAKQ | FALSE | TRUE | FALSE | 20.11 |
| P08670 | 304 | BNNDALBQAKQE | FALSE | TRUE | FALSE | 15.2  |
| P08670 | 307 | DALBQAKQESTE | FALSE | TRUE | FALSE | 15.29 |
| P08670 | 308 | ALBQAKQESTEY | FALSE | TRUE | FALSE | 26.58 |
| P08670 | 309 | LBQAKQESTEYB | FALSE | TRUE | FALSE | 22.76 |
| P08670 | 310 | BQAKQESTEYBB | FALSE | TRUE | FALSE | 25.45 |
| P08670 | 311 | QAKQESTEYBBQ | FALSE | TRUE | FALSE | 20.39 |
| P08670 | 312 | AKQESTEYBBQV | FALSE | TRUE | FALSE | 24.18 |
| P08670 | 313 | KQESTEYBBQVQ | FALSE | TRUE | FALSE | 25.49 |
| P08670 | 314 | QESTEYBBQVQS | FALSE | TRUE | FALSE | 33.02 |
| P08670 | 315 | ESTEYBBQVQSL | FALSE | TRUE | FALSE | 22.15 |
| P08670 | 316 | STEYBBQVQSLT | FALSE | TRUE | FALSE | 42.76 |
| P08670 | 317 | TEYBBQVQSLTC | FALSE | TRUE | FALSE | 21.57 |
| P08670 | 318 | EYBBQVQSLTCE | FALSE | TRUE | FALSE | 24.78 |
| P08670 | 319 | YBBQVQSLTCEV | FALSE | TRUE | FALSE | 19.23 |
| P08670 | 320 | BBQVQSLTCEVD | FALSE | TRUE | FALSE | 14.34 |
| P08670 | 342 | BQMBEMEENFAV | FALSE | TRUE | FALSE | 10.66 |
| P08670 | 371 | NMKEEMABHLBE | FALSE | TRUE | FALSE | 13.76 |
| P08670 | 372 | MKEEMABHLBEY | FALSE | TRUE | FALSE | 10.89 |
| P08670 | 373 | KEEMABHLBEYQ | FALSE | TRUE | FALSE | 22.58 |
| P08670 | 374 | EEMABHLBEYQD | FALSE | TRUE | FALSE | 14.85 |
| P08670 | 375 | EMABHLBEYQDL | FALSE | TRUE | FALSE | 28.55 |
| P08670 | 376 | MABHLBEYQDLL | FALSE | TRUE | FALSE | 33.54 |
| P08670 | 377 | ABHLBEYQDLLN | FALSE | TRUE | FALSE | 37.79 |
| P08670 | 378 | BHLBEYQDLLNV | FALSE | TRUE | FALSE | 18.77 |
| P08670 | 379 | HLBEYQDLLNVK | FALSE | TRUE | FALSE | 17.64 |
| P08670 | 415 | LPNFSSLNLBET | FALSE | TRUE | FALSE | 15.02 |
| P08670 | 416 | PNFSSLNLBETN | FALSE | TRUE | FALSE | 13.26 |
| P08670 | 418 | FSSLNLBETNLD | FALSE | TRUE | FALSE | 11.03 |
| P08670 | 419 | SSLNLBETNLDS | FALSE | TRUE | FALSE | 15.71 |
| P08670 | 420 | SLNLBETNLDSL | FALSE | TRUE | FALSE | 11.35 |

|        |     |               |       |      |       |       |
|--------|-----|---------------|-------|------|-------|-------|
| P08670 | 421 | LNLBETNLDSLPL | FALSE | TRUE | FALSE | 27.36 |
| P08670 | 422 | NLBETNLDSLPL  | FALSE | TRUE | FALSE | 10.47 |
| P08670 | 423 | LBETNLDSLPLV  | FALSE | TRUE | FALSE | 13.1  |
| P08670 | 439 | KBTLIKTVETB   | FALSE | TRUE | FALSE | 16.58 |
| P08670 | 442 | LLIKTVETBDGQ  | FALSE | TRUE | FALSE | 10.44 |
| P08670 | 443 | LIKTVETBDGQV  | FALSE | TRUE | FALSE | 14.22 |
| P08670 | 444 | IKTIVETBDGQVI | FALSE | TRUE | FALSE | 25.56 |
| P08670 | 445 | KTVETBDGQVIN  | FALSE | TRUE | FALSE | 35.69 |
| P08670 | 446 | TVETBDGQVINE  | FALSE | TRUE | FALSE | 22.58 |
| P08670 | 447 | VETBDGQVINET  | FALSE | TRUE | FALSE | 22.01 |
| P08670 | 448 | ETBDGQVINETS  | FALSE | TRUE | FALSE | 17.56 |
| P08670 | 449 | TBDGQVINETSQ  | FALSE | TRUE | FALSE | 14.11 |
| P18206 | 1   | MPVFHTBTIESI  | FALSE | TRUE | FALSE | 16.69 |
| P18206 | 50  | AVSNLVBVGKET  | FALSE | TRUE | FALSE | 13.66 |
| P18206 | 51  | VSNLVBVGKETV  | FALSE | TRUE | FALSE | 14.58 |
| P18206 | 52  | SNLVBVGKETVQ  | FALSE | TRUE | FALSE | 14.93 |
| P18206 | 54  | LVBVGKETVQTT  | FALSE | TRUE | FALSE | 14.35 |
| P18206 | 102 | VPABDYLDIGSB  | FALSE | TRUE | FALSE | 18.4  |
| P18206 | 103 | PABDYLDIGSBG  | FALSE | TRUE | FALSE | 19.54 |
| P18206 | 104 | ABDYLDIGSBGI  | FALSE | TRUE | FALSE | 27.69 |
| P18206 | 105 | BDYLDIGSBGIL  | FALSE | TRUE | FALSE | 23.76 |
| P18206 | 106 | DYLDIGSBGILS  | FALSE | TRUE | FALSE | 15.78 |
| P18206 | 107 | YLIDGSBGILSG  | FALSE | TRUE | FALSE | 23.21 |
| P18206 | 108 | LIDGSBGILSGT  | FALSE | TRUE | FALSE | 14.57 |
| P18206 | 109 | IDGSBGILSGTS  | FALSE | TRUE | FALSE | 18.53 |
| P18206 | 110 | DGSBGILSGTSD  | FALSE | TRUE | FALSE | 16.03 |
| P18206 | 111 | GSBGILSGTSDL  | FALSE | TRUE | FALSE | 13.46 |
| P18206 | 112 | SBGILSGTSDLL  | FALSE | TRUE | FALSE | 10.13 |
| P18206 | 177 | EBQQELTHQEHB  | FALSE | TRUE | FALSE | 12.25 |
| P18206 | 225 | EALKNBNFTVEK  | FALSE | TRUE | FALSE | 14.03 |
| P18206 | 297 | QAIBQILDEAGK  | FALSE | TRUE | FALSE | 28.1  |
| P18206 | 298 | AIBQILDEAGKV  | FALSE | TRUE | FALSE | 23.6  |
| P18206 | 299 | IBQILDEAGKVG  | FALSE | TRUE | FALSE | 16.33 |
| P18206 | 308 | KVGELCAGKEBB  | FALSE | TRUE | FALSE | 10.46 |
| P18206 | 310 | GELCAGKEBBEI  | FALSE | TRUE | FALSE | 12.2  |
| P18206 | 311 | ELCAGKEBBEIL  | FALSE | TRUE | FALSE | 18.67 |
| P18206 | 312 | LCAGKEBBEILG  | FALSE | TRUE | FALSE | 21.22 |
| P18206 | 313 | CAGKEBBEILGT  | FALSE | TRUE | FALSE | 22.42 |
| P18206 | 314 | AGKEBBEILGTC  | FALSE | TRUE | FALSE | 17.29 |
| P18206 | 315 | GKEBBEILGTCK  | FALSE | TRUE | FALSE | 15.5  |
| P18206 | 316 | KEBBEILGTCKM  | FALSE | TRUE | FALSE | 26.45 |
| P18206 | 317 | EBBEILGTCKML  | FALSE | TRUE | FALSE | 24.15 |
| P18206 | 318 | BBEILGTCKMLG  | FALSE | TRUE | FALSE | 21.01 |
| P18206 | 332 | TDQVADLBABGQ  | FALSE | TRUE | FALSE | 11.87 |
| P18206 | 333 | DQVADLBABGQG  | FALSE | TRUE | FALSE | 11.04 |
| P18206 | 334 | QVADLBABGQGS  | FALSE | TRUE | FALSE | 33.07 |
| P18206 | 335 | VADLBABGQGSS  | FALSE | TRUE | FALSE | 37.14 |
| P18206 | 336 | ADLBABGQGSSP  | FALSE | TRUE | FALSE | 31.51 |
| P18206 | 337 | DLBABGQGSSPV  | FALSE | TRUE | FALSE | 41.62 |
| P18206 | 338 | LBABGQGSSPVA  | FALSE | TRUE | FALSE | 35.7  |
| P18206 | 339 | BABGQGSSPVAM  | FALSE | TRUE | FALSE | 50.13 |
| P18206 | 340 | ABGQGSSPVAMQ  | FALSE | TRUE | FALSE | 30.7  |

|        |     |               |       |      |       |       |
|--------|-----|---------------|-------|------|-------|-------|
| P18206 | 405 | EEQIBGALAEAB  | FALSE | TRUE | FALSE | 11.61 |
| P18206 | 406 | EQIBGALAEABK  | FALSE | TRUE | FALSE | 36.2  |
| P18206 | 407 | QIBGALAEABKI  | FALSE | TRUE | FALSE | 41.54 |
| P18206 | 408 | IBGALAEABKIA  | FALSE | TRUE | FALSE | 33.22 |
| P18206 | 409 | BGALAEABKIAE  | FALSE | TRUE | FALSE | 25.2  |
| P18206 | 440 | ALTSKLADLBBQ  | FALSE | TRUE | FALSE | 11.62 |
| P18206 | 441 | LTSKLADLBBQG  | FALSE | TRUE | FALSE | 12.12 |
| P18206 | 444 | KLADLBBQKGKD  | FALSE | TRUE | FALSE | 12.88 |
| P18206 | 445 | LADLBBQGGKGS  | FALSE | TRUE | FALSE | 34.16 |
| P18206 | 446 | ADLBBQGGKGDSP | FALSE | TRUE | FALSE | 41.84 |
| P18206 | 447 | DLBBQGGKGDSP  | FALSE | TRUE | FALSE | 35.04 |
| P18206 | 448 | LBBQGGKGDSP   | FALSE | TRUE | FALSE | 41.48 |
| P18206 | 449 | BBQGGKGDSP    | FALSE | TRUE | FALSE | 41.05 |
| P18206 | 450 | BQGGKGDSP     | FALSE | TRUE | FALSE | 18.73 |
| P18206 | 458 | EABALAKQVATA  | FALSE | TRUE | FALSE | 14.13 |
| P18206 | 500 | AQBWIDNPTVDD  | FALSE | TRUE | FALSE | 10.1  |
| P18206 | 509 | VDDBGVQAAIB   | FALSE | TRUE | FALSE | 10.54 |
| P18206 | 510 | DDBGVQAAIBG   | FALSE | TRUE | FALSE | 16.48 |
| P18206 | 511 | DBGVQAAIBGL   | FALSE | TRUE | FALSE | 15.14 |
| P18206 | 512 | BGVQAAIBGLV   | FALSE | TRUE | FALSE | 15.58 |
| P18206 | 513 | GVQAAIBGLVA   | FALSE | TRUE | FALSE | 10.44 |
| P18206 | 514 | VGQAAIBGLVAE  | FALSE | TRUE | FALSE | 12.91 |
| P18206 | 515 | GQAAIBGLVAEG  | FALSE | TRUE | FALSE | 13.18 |
| P18206 | 516 | QAAIBGLVAEGH  | FALSE | TRUE | FALSE | 14.81 |
| P18206 | 517 | AAIBGLVAEGHB  | FALSE | TRUE | FALSE | 15.34 |
| P18206 | 518 | AIBGLVAEGHBL  | FALSE | TRUE | FALSE | 12.93 |
| P18206 | 519 | IBGLVAEGHBLA  | FALSE | TRUE | FALSE | 13.13 |
| P18206 | 527 | HBLANVMMGPYB  | FALSE | TRUE | FALSE | 20.36 |
| P18206 | 528 | BLANVMMGPYBQ  | FALSE | TRUE | FALSE | 17.33 |
| P18206 | 530 | ANVMMGPYBQDL  | FALSE | TRUE | FALSE | 17.59 |
| P18206 | 531 | NVMMGPYBQDLL  | FALSE | TRUE | FALSE | 15.19 |
| P18206 | 532 | VMMGPYBQDLLA  | FALSE | TRUE | FALSE | 21.19 |
| P18206 | 533 | MMGPYBQDLLAK  | FALSE | TRUE | FALSE | 19.96 |
| P18206 | 534 | MGPYBQDLLAKC  | FALSE | TRUE | FALSE | 23.25 |
| P18206 | 535 | GPYBQDLLAKCD  | FALSE | TRUE | FALSE | 12.92 |
| P18206 | 536 | PYBQDLLAKCDB  | FALSE | TRUE | FALSE | 21.2  |
| P18206 | 537 | YBQDLLAKCDBV  | FALSE | TRUE | FALSE | 43.04 |
| P18206 | 538 | BQDLLAKCDBVD  | FALSE | TRUE | FALSE | 19.58 |
| P18206 | 559 | AABGEGESPQAB  | FALSE | TRUE | FALSE | 17.53 |
| P18206 | 560 | ABGEGESPQABA  | FALSE | TRUE | FALSE | 16.74 |
| P18206 | 561 | BGEGESPQABAL  | FALSE | TRUE | FALSE | 13.21 |
| P18206 | 566 | SPQABALASQLQ  | FALSE | TRUE | FALSE | 11.14 |
| P18206 | 568 | QABALASQLQDS  | FALSE | TRUE | FALSE | 11.83 |
| P18206 | 583 | LKABMQEAMTQE  | FALSE | TRUE | FALSE | 13.74 |
| P18206 | 621 | NBEEVFDEBAAN  | FALSE | TRUE | FALSE | 10.14 |
| P18206 | 658 | VEGIQASVKTAB  | FALSE | TRUE | FALSE | 10.4  |
| P18206 | 659 | EGIQASVKTABE  | FALSE | TRUE | FALSE | 17.23 |
| P18206 | 661 | IQASVKTABELT  | FALSE | TRUE | FALSE | 10.62 |
| P18206 | 662 | QASVKTABELTP  | FALSE | TRUE | FALSE | 13.45 |
| P18206 | 664 | SVKTABELTPQV  | FALSE | TRUE | FALSE | 12.81 |
| P18206 | 667 | TABELTPQVSA   | FALSE | TRUE | FALSE | 18.31 |
| P18206 | 669 | BELTPQVSAAB   | FALSE | TRUE | FALSE | 10.82 |



|        |      |              |       |      |       |       |
|--------|------|--------------|-------|------|-------|-------|
| P18206 | 677  | SAABILLBNPGN | FALSE | TRUE | FALSE | 11.94 |
| P18206 | 678  | AABILLBNPGNQ | FALSE | TRUE | FALSE | 14.47 |
| P18206 | 748  | MLVAGATSIABB | FALSE | TRUE | FALSE | 17.7  |
| P18206 | 749  | LVAGATSIABBA | FALSE | TRUE | FALSE | 15.18 |
| P18206 | 750  | VAGATSIABBAN | FALSE | TRUE | FALSE | 28.52 |
| P18206 | 751  | AGATSIABBANB | FALSE | TRUE | FALSE | 27.03 |
| P18206 | 752  | GATSIABBANBI | FALSE | TRUE | FALSE | 26.87 |
| P18206 | 753  | ATSIABBANBIL | FALSE | TRUE | FALSE | 23.23 |
| P18206 | 754  | TSIABBANBILL | FALSE | TRUE | FALSE | 18.66 |
| P18206 | 764  | LLVAKBEVENSE | FALSE | TRUE | FALSE | 11.11 |
| P18206 | 765  | LVAKBEVENSED | FALSE | TRUE | FALSE | 10.69 |
| P18206 | 766  | VAKBEVENSEDP | FALSE | TRUE | FALSE | 14.1  |
| P18206 | 767  | AKBEVENSEDPK | FALSE | TRUE | FALSE | 13.74 |
| P18206 | 768  | KBEVENSEDPKF | FALSE | TRUE | FALSE | 12.06 |
| P18206 | 769  | BEVENSEDPKFB | FALSE | TRUE | FALSE | 10.15 |
| P18206 | 773  | NSEDPKFBEAVK | FALSE | TRUE | FALSE | 18.62 |
| P18206 | 774  | SEDPKFBEAVKA | FALSE | TRUE | FALSE | 16.51 |
| P18206 | 775  | EDPKFBEAVKAA | FALSE | TRUE | FALSE | 12.28 |
| P18206 | 776  | DPKFBEAVKAAS | FALSE | TRUE | FALSE | 16.11 |
| P18206 | 777  | PKFBEAVKAASD | FALSE | TRUE | FALSE | 16.14 |
| P18206 | 778  | KFBEAVKAASDE | FALSE | TRUE | FALSE | 19.18 |
| P18206 | 779  | FBEAVKAASDEL | FALSE | TRUE | FALSE | 23.66 |
| P18206 | 828  | VAKVBEAFQPQE | FALSE | TRUE | FALSE | 15.38 |
| P18206 | 829  | AKVBEAFQPQEP | FALSE | TRUE | FALSE | 16.51 |
| P18206 | 830  | KVBEAFQPQEPD | FALSE | TRUE | FALSE | 18.37 |
| P18206 | 831  | VBEAFQPQEPDF | FALSE | TRUE | FALSE | 16.06 |
| P18206 | 832  | BEAFQPQEPDFP | FALSE | TRUE | FALSE | 13.43 |
| P18206 | 899  | MMAABQLHDEAB | FALSE | TRUE | FALSE | 10.27 |
| P18206 | 900  | MAABQLHDEABK | FALSE | TRUE | FALSE | 20.83 |
| P18206 | 901  | AABQLHDEABKW | FALSE | TRUE | FALSE | 47.3  |
| P18206 | 902  | ABQLHDEABKWS | FALSE | TRUE | FALSE | 56.53 |
| P18206 | 903  | BQLHDEABKWSS | FALSE | TRUE | FALSE | 70.78 |
| P18206 | 904  | QLHDEABKWSSK | FALSE | TRUE | FALSE | 11.52 |
| P18206 | 905  | LHDEABKWSSKP | FALSE | TRUE | FALSE | 11.15 |
| P18206 | 906  | HDEABKWSSKPG | FALSE | TRUE | FALSE | 18.06 |
| P18206 | 907  | DEABKWSSKPGI | FALSE | TRUE | FALSE | 20.33 |
| P18206 | 908  | EABKWSSKPGIP | FALSE | TRUE | FALSE | 15.2  |
| P18206 | 967  | LAAAQSLHBEAT | FALSE | TRUE | FALSE | 11.6  |
| P18206 | 968  | AAAQSLHBEATK | FALSE | TRUE | FALSE | 10.63 |
| P18206 | 969  | AAQSLHBEATKW | FALSE | TRUE | FALSE | 29.89 |
| P18206 | 970  | AQSLHBEATKWS | FALSE | TRUE | FALSE | 32.74 |
| P18206 | 971  | QSLHBEATKWSS | FALSE | TRUE | FALSE | 30.95 |
| P18206 | 975  | BEATKWSSKGND | FALSE | TRUE | FALSE | 14.84 |
| P18206 | 998  | MAEMSLVBGGGS | FALSE | TRUE | FALSE | 19.32 |
| P18206 | 999  | AEMSLVBGGSG  | FALSE | TRUE | FALSE | 15.62 |
| P18206 | 1000 | EMSLVBGGSGT  | FALSE | TRUE | FALSE | 38.24 |
| P18206 | 1001 | MSBLVBGGSGTK | FALSE | TRUE | FALSE | 29.57 |
| P18206 | 1002 | SBLVBGGSGTKB | FALSE | TRUE | FALSE | 24.78 |
| P18206 | 1003 | BLVBGGSGTKBA | FALSE | TRUE | FALSE | 19.73 |
| P18206 | 1004 | LVBGGSGTKBAL | FALSE | TRUE | FALSE | 13.72 |
| P18206 | 1005 | VBGGSGTKBALI | FALSE | TRUE | FALSE | 16.11 |
| P18206 | 1039 | QCTDKBIBTNLL | FALSE | TRUE | FALSE | 11.15 |

|        |      |               |       |      |       |       |
|--------|------|---------------|-------|------|-------|-------|
| P18206 | 1040 | CTDKBIBTNLLQ  | FALSE | TRUE | FALSE | 11.4  |
| P18206 | 1074 | LGBTNISDEESE  | FALSE | TRUE | FALSE | 11.89 |
| P18206 | 1104 | ETVBEAEAASIK  | FALSE | TRUE | FALSE | 12.43 |
| P18206 | 1105 | TVBEAEAASIKI  | FALSE | TRUE | FALSE | 12.79 |
| P18206 | 1106 | VBEAEAASIKIB  | FALSE | TRUE | FALSE | 14.67 |
| P18206 | 1107 | BEAEAASIKIBT  | FALSE | TRUE | FALSE | 13.63 |
| P18206 | 1114 | IKIBTDAGFTLB  | FALSE | TRUE | FALSE | 19.01 |
| P02774 | 11   | VAFGHALEBGBD  | FALSE | TRUE | FALSE | 18.73 |
| P02774 | 12   | AFGHALEBGBDY  | FALSE | TRUE | FALSE | 22.75 |
| P02774 | 13   | FGHALEBGBDYE  | FALSE | TRUE | FALSE | 22.74 |
| P02774 | 14   | GHALEBGBDYEK  | FALSE | TRUE | FALSE | 21.15 |
| P02774 | 15   | HALEBGBDYEKN  | FALSE | TRUE | FALSE | 20.52 |
| P02774 | 16   | ALEBGBDYEKNK  | FALSE | TRUE | FALSE | 27.55 |
| P02774 | 17   | LEBGBDYEKNKV  | FALSE | TRUE | FALSE | 26.19 |
| P02774 | 18   | EBGBDYEKNKVC  | FALSE | TRUE | FALSE | 22.79 |
| P02774 | 47   | LYSBKFPSGTFE  | FALSE | TRUE | FALSE | 20.78 |
| P02774 | 48   | YSBKFPSGTFEQ  | FALSE | TRUE | FALSE | 15.93 |
| P02774 | 79   | ADPCYDTBTSA   | FALSE | TRUE | FALSE | 10.42 |
| P02774 | 80   | DPDCYDTBTSAL  | FALSE | TRUE | FALSE | 16.98 |
| P02774 | 81   | PDCYDTBTSALS  | FALSE | TRUE | FALSE | 14.95 |
| P02774 | 82   | DCYDTBTSALSA  | FALSE | TRUE | FALSE | 17.48 |
| P02774 | 83   | CYDTBTSALSAK  | FALSE | TRUE | FALSE | 20.78 |
| P02774 | 84   | YDTBTSALSAKS  | FALSE | TRUE | FALSE | 17.95 |
| P02774 | 342  | VMDKYTFELSBB  | FALSE | TRUE | FALSE | 21.15 |
| P02774 | 343  | MDKYTFELSBBT  | FALSE | TRUE | FALSE | 15.64 |
| P02774 | 344  | DKYTFELSBBTH  | FALSE | TRUE | FALSE | 19.08 |
| P02774 | 345  | KYTFELSBBTHL  | FALSE | TRUE | FALSE | 17.25 |
| P02774 | 346  | YTFELSBBTHLP  | FALSE | TRUE | FALSE | 13.01 |
| P02774 | 347  | TFELSBBTHLPE  | FALSE | TRUE | FALSE | 22.19 |
| P02774 | 348  | FELSBBTHLPEV  | FALSE | TRUE | FALSE | 26.07 |
| P02774 | 349  | ELSBPTHLPEVFL | FALSE | TRUE | FALSE | 28.38 |
| P02774 | 350  | LSBBTHLPEVFL  | FALSE | TRUE | FALSE | 15.63 |
| P02774 | 351  | SBBTHLPEVFLS  | FALSE | TRUE | FALSE | 15.15 |
| P02774 | 437  | ELAKLVNKBSDF  | FALSE | TRUE | FALSE | 11.45 |
| P02774 | 441  | LVNKBSDFASNC  | FALSE | TRUE | FALSE | 15.03 |
| P02774 | 442  | VNKBSDFASNCC  | FALSE | TRUE | FALSE | 16.15 |
| P02774 | 444  | KBSDFASNCCSI  | FALSE | TRUE | FALSE | 19.27 |
| P25311 | 55   | DLQFFBYNSKDB  | FALSE | TRUE | FALSE | 13.43 |
| P25311 | 65   | DBKSQPMGLWBQ  | FALSE | TRUE | FALSE | 19.31 |
| P25311 | 69   | QPMGLWBQVEGM  | FALSE | TRUE | FALSE | 10.85 |
| P25311 | 73   | LWBQVEGMEDWK  | FALSE | TRUE | FALSE | 11.47 |
| P25311 | 74   | WBQVEGMEDWKC  | FALSE | TRUE | FALSE | 12.16 |
| P25311 | 83   | WKQDSQLQKABE  | FALSE | TRUE | FALSE | 10.73 |
| P25311 | 86   | DSQLQKABEDIF  | FALSE | TRUE | FALSE | 10.06 |
| P25311 | 87   | SQLQKABEDIFM  | FALSE | TRUE | FALSE | 13.67 |
| P25311 | 88   | QLQKABEDIFME  | FALSE | TRUE | FALSE | 13.27 |
| P25311 | 89   | LQKABEDIFMET  | FALSE | TRUE | FALSE | 16.81 |
| P25311 | 90   | QKABEDIFMETL  | FALSE | TRUE | FALSE | 15.62 |
| P25311 | 91   | KABEDIFMETLK  | FALSE | TRUE | FALSE | 19.14 |
| P25311 | 92   | ABEDIFMETLKD  | FALSE | TRUE | FALSE | 18.07 |
| P25311 | 116  | VLQGBFGCEIEN  | FALSE | TRUE | FALSE | 13.6  |
| P25311 | 117  | LQGBFGCEIENN  | FALSE | TRUE | FALSE | 16.28 |

|        |     |              |       |      |       |       |
|--------|-----|--------------|-------|------|-------|-------|
| P25311 | 118 | QGBFGCEIENNB | FALSE | TRUE | FALSE | 16.51 |
| P25311 | 119 | GBFGCEIENNBS | FALSE | TRUE | FALSE | 10.78 |
| P25311 | 120 | BFGCEIENNBSS | FALSE | TRUE | FALSE | 12.18 |
| P25311 | 166 | QKWEAEPVYVQB | FALSE | TRUE | FALSE | 19.21 |
| P25311 | 167 | KWEAEPVYVQBA | FALSE | TRUE | FALSE | 11.35 |
| P25311 | 168 | WEAEPVYVQBAK | FALSE | TRUE | FALSE | 13.88 |
| P25311 | 169 | EAEPVYVQBAKA | FALSE | TRUE | FALSE | 11.68 |
| P25311 | 173 | VYVQBAKAYLEE | FALSE | TRUE | FALSE | 28.48 |
| P25311 | 174 | YVQBAKAYLEEE | FALSE | TRUE | FALSE | 35.23 |
| P25311 | 175 | VQBAKAYLEEEC | FALSE | TRUE | FALSE | 10.73 |
| P25311 | 198 | KNILDBQDPPSV | FALSE | TRUE | FALSE | 16.14 |
| P25311 | 230 | FYPGKIDVHWTB | FALSE | TRUE | FALSE | 12.64 |
| P25311 | 231 | YPGKIDVHWTBA | FALSE | TRUE | FALSE | 22.26 |
| P25311 | 232 | PGKIDVHWTBAG | FALSE | TRUE | FALSE | 12.15 |
| P25311 | 233 | GKIDVHWTBAGE | FALSE | TRUE | FALSE | 24.43 |
| P25311 | 234 | KIDVHWTBAGEV | FALSE | TRUE | FALSE | 33.29 |
| P25311 | 235 | IDVHWTBAGEVQ | FALSE | TRUE | FALSE | 32.39 |
| P25311 | 236 | DVHWTBAGEVQE | FALSE | TRUE | FALSE | 31.33 |
| P25311 | 237 | VHWTBAGEVQEP | FALSE | TRUE | FALSE | 22.62 |
| P25311 | 238 | HWTBAGEVQEPE | FALSE | TRUE | FALSE | 37.84 |
| P25311 | 239 | WTBAGEVQEPEL | FALSE | TRUE | FALSE | 41.31 |
| P25311 | 240 | TBAGEVQEPELB | FALSE | TRUE | FALSE | 12.62 |
| P25311 | 241 | BAGEVQEPELBG | FALSE | TRUE | FALSE | 11.23 |
| P25311 | 247 | EPELBGDVLHNG | FALSE | TRUE | FALSE | 11.28 |
| P25311 | 248 | PELBGDVLHNGN | FALSE | TRUE | FALSE | 16.42 |
| P25311 | 249 | ELBGDVLHNGNG | FALSE | TRUE | FALSE | 15.75 |
| P25311 | 250 | LBGDVLHNGNGT | FALSE | TRUE | FALSE | 20.58 |
| P25311 | 251 | BGDVLHNGNGTY | FALSE | TRUE | FALSE | 14.19 |

TRUE AND FALSE refer to whether or not the peptide is native or has citrulline (B) or homocitrulline (J). IgG binding (RA/Control) refers to the average IgG binding signal for RA subjects divided by control subjects for the listed peptide.
